# Supplementary material for: Identification of orphan ligand-receptor relationships using a cell-based CRISPRa enrichment screening platform
Source: eLife. 2022 Sep 30;11:e81398. doi: 10.7554/eLife.81398 (PMC9578707; doi:10.7554/eLife.81398)
Supplement: Figure 1—source data 1. — Information for both customized cell surface libraries, library ID, target ID, and gRNA sequences for the single-pass transmembrane (TM1) and multi-pass transmembrane (TM2+) libraries. [file elife-81398-fig1-data1.xlsx]

## Sheet: KCGS_TM1
Library	Library ID	Type	Target ID	gRNA
TM1	A1	Targeting	A3GALT2_+_33786914.23-ENST00000442999.3	TGCAAGTGTACAAATCCAGCCCACCTTGTTGGCAGGTGATTGGCCCCAAAAGTTTAAGAGCTAAGCTGTAGGAAAGGGATCACCGTTC
TM1	A1	Targeting	A3GALT2_-_33786835.23-ENST00000442999.3	TGCAAGTGTACAAATCCAGCCCACCTTGTTGGTGCACCCACAGGAGCAGTCGTTTAAGAGCTAAGCTGTAGGAAAGGGATCACCGTTC
TM1	A1	Targeting	A3GALT2_-_33786839.23-ENST00000442999.3	TGCAAGTGTACAAATCCAGCCCACCTTGTTGGCCCACAGGAGCAGTCAGGAGTTTAAGAGCTAAGCTGTAGGAAAGGGATCACCGTTC
TM1	A1	Targeting	A3GALT2_-_33786853.23-ENST00000442999.3	TGCAAGTGTACAAATCCAGCCCACCTTGTTGGCAGGATGGACTGCCTGCGAGTTTAAGAGCTAAGCTGTAGGAAAGGGATCACCGTTC
TM1	A1	Targeting	A3GALT2_-_33786863.23-ENST00000442999.3	TGCAAGTGTACAAATCCAGCCCACCTTGTTGGTGCCTGCGAGGGACCTGCCGTTTAAGAGCTAAGCTGTAGGAAAGGGATCACCGTTC
TM1	A1	Targeting	A3GALT2_-_33786879.23-ENST00000442999.3	TGCAAGTGTACAAATCCAGCCCACCTTGTTGGGCCGGGGATGCAACCTTTTGTTTAAGAGCTAAGCTGTAGGAAAGGGATCACCGTTC
TM1	A1	Targeting	A3GALT2_-_33786924.23-ENST00000442999.3	TGCAAGTGTACAAATCCAGCCCACCTTGTTGGGGGGCTGGCAACCCTTTTGGTTTAAGAGCTAAGCTGTAGGAAAGGGATCACCGTTC
TM1	A1	Targeting	A3GALT2_-_33786947.23-ENST00000442999.3	TGCAAGTGTACAAATCCAGCCCACCTTGTTGGCAATCACCTGGAAGAGGGTGTTTAAGAGCTAAGCTGTAGGAAAGGGATCACCGTTC
TM1	A1	Targeting	A3GALT2_-_33786967.23-ENST00000442999.3	TGCAAGTGTACAAATCCAGCCCACCTTGTTGGGGTCTGAGTAGGCCAGTTCGTTTAAGAGCTAAGCTGTAGGAAAGGGATCACCGTTC
TM1	A1	Targeting	A3GALT2_-_33786971.23-ENST00000442999.3	TGCAAGTGTACAAATCCAGCCCACCTTGTTGGTGAGTAGGCCAGTTCTGGTGTTTAAGAGCTAAGCTGTAGGAAAGGGATCACCGTTC
TM1	A1	Targeting	AADACL4_+_12704309.23-P1P2	TGCAAGTGTACAAATCCAGCCCACCTTGTTGGCATCATGGGGAGTCTTGGAGTTTAAGAGCTAAGCTGTAGGAAAGGGATCACCGTTC
TM1	A1	Targeting	AADACL4_+_12704385.23-P1P2	TGCAAGTGTACAAATCCAGCCCACCTTGTTGGGCACAAAAAGGCCAATGGGGTTTAAGAGCTAAGCTGTAGGAAAGGGATCACCGTTC
TM1	A1	Targeting	AADACL4_+_12704396.23-P1P2	TGCAAGTGTACAAATCCAGCCCACCTTGTTGGTCTCAGGGTAAGCACAAAAGTTTAAGAGCTAAGCTGTAGGAAAGGGATCACCGTTC
TM1	A1	Targeting	AADACL4_+_12704411.23-P1P2	TGCAAGTGTACAAATCCAGCCCACCTTGTTGGTGGCCTGACACAGCTTCTCGTTTAAGAGCTAAGCTGTAGGAAAGGGATCACCGTTC
TM1	A1	Targeting	AADACL4_-_12704055.23-P1P2	TGCAAGTGTACAAATCCAGCCCACCTTGTTGGGGCCCAGAGGGTACATAGGGTTTAAGAGCTAAGCTGTAGGAAAGGGATCACCGTTC
TM1	A1	Targeting	AADACL4_-_12704118.23-P1P2	TGCAAGTGTACAAATCCAGCCCACCTTGTTGGGGGTTAGGGAAGCTAGCTAGTTTAAGAGCTAAGCTGTAGGAAAGGGATCACCGTTC
TM1	A1	Targeting	AADACL4_-_12704126.23-P1P2	TGCAAGTGTACAAATCCAGCCCACCTTGTTGGGAAGCTAGCTAGGGAGCTGGTTTAAGAGCTAAGCTGTAGGAAAGGGATCACCGTTC
TM1	A1	Targeting	AADACL4_-_12704216.23-P1P2	TGCAAGTGTACAAATCCAGCCCACCTTGTTGGTTGAAAGATCAGGCCCTGGGTTTAAGAGCTAAGCTGTAGGAAAGGGATCACCGTTC
TM1	A1	Targeting	AADACL4_-_12704368.23-P1P2	TGCAAGTGTACAAATCCAGCCCACCTTGTTGGCTGGGTCCCCACATTGCTTGTTTAAGAGCTAAGCTGTAGGAAAGGGATCACCGTTC
TM1	A1	Targeting	AADACL4_-_12704476.23-P1P2	TGCAAGTGTACAAATCCAGCCCACCTTGTTGGCCCAGAGAGAGTGAGGTGGGTTTAAGAGCTAAGCTGTAGGAAAGGGATCACCGTTC
TM1	A1	Targeting	AATK_+_79139934.23-ENST00000326724.4	TGCAAGTGTACAAATCCAGCCCACCTTGTTGGCCCACCGGTGCGGGCTCTGGTTTAAGAGCTAAGCTGTAGGAAAGGGATCACCGTTC
TM1	A1	Targeting	AATK_-_79140109.23-ENST00000326724.4	TGCAAGTGTACAAATCCAGCCCACCTTGTTGGCATGGGGGGAGCACGGAGAGTTTAAGAGCTAAGCTGTAGGAAAGGGATCACCGTTC
TM1	A1	Targeting	AATK_-_79140120.23-ENST00000326724.4	TGCAAGTGTACAAATCCAGCCCACCTTGTTGGCACGGAGAGGGGGACACGGGTTTAAGAGCTAAGCTGTAGGAAAGGGATCACCGTTC
TM1	A1	Targeting	AATK_-_79140160.23-ENST00000326724.4	TGCAAGTGTACAAATCCAGCCCACCTTGTTGGCGGAGTGGGGGACACAGAAGTTTAAGAGCTAAGCTGTAGGAAAGGGATCACCGTTC
TM1	A1	Targeting	AATK_-_79140171.23-ENST00000326724.4	TGCAAGTGTACAAATCCAGCCCACCTTGTTGGACACAGAAGGGGGCTTGGAGTTTAAGAGCTAAGCTGTAGGAAAGGGATCACCGTTC
TM1	A1	Targeting	AATK_-_79140196.23-ENST00000326724.4	TGCAAGTGTACAAATCCAGCCCACCTTGTTGGACACGGAGGGGAGGCATGGGTTTAAGAGCTAAGCTGTAGGAAAGGGATCACCGTTC
TM1	A1	Targeting	AATK_-_79140243.23-ENST00000326724.4	TGCAAGTGTACAAATCCAGCCCACCTTGTTGGAGCGGGGATGGCACGGAGTGTTTAAGAGCTAAGCTGTAGGAAAGGGATCACCGTTC
TM1	A1	Targeting	AATK_-_79140288.23-ENST00000326724.4	TGCAAGTGTACAAATCCAGCCCACCTTGTTGGCGGCGGCCTGGGGCTGAGGGTTTAAGAGCTAAGCTGTAGGAAAGGGATCACCGTTC
TM1	A1	Targeting	AATK_-_79140332.23-ENST00000326724.4	TGCAAGTGTACAAATCCAGCCCACCTTGTTGGGGGAAACGGAAGTCGTGAAGTTTAAGAGCTAAGCTGTAGGAAAGGGATCACCGTTC
TM1	A1	Targeting	AATK_-_79140437.23-ENST00000326724.4	TGCAAGTGTACAAATCCAGCCCACCTTGTTGGGAACCCGGGAGCACACCCAGTTTAAGAGCTAAGCTGTAGGAAAGGGATCACCGTTC
TM1	A1	Targeting	ABHD13_+_108870634.23-P1P2	TGCAAGTGTACAAATCCAGCCCACCTTGTTGGGCTCCCTGCTCCAGGACCTGTTTAAGAGCTAAGCTGTAGGAAAGGGATCACCGTTC
TM1	A1	Targeting	ABHD13_+_108870666.23-P1P2	TGCAAGTGTACAAATCCAGCCCACCTTGTTGGGACGGAAAAGATACCTCGGGTTTAAGAGCTAAGCTGTAGGAAAGGGATCACCGTTC
TM1	A1	Targeting	ABHD13_+_108870669.23-P1P2	TGCAAGTGTACAAATCCAGCCCACCTTGTTGGCCGGACGGAAAAGATACCTGTTTAAGAGCTAAGCTGTAGGAAAGGGATCACCGTTC
TM1	A1	Targeting	ABHD13_+_108870683.23-P1P2	TGCAAGTGTACAAATCCAGCCCACCTTGTTGGCCCGCGACGGTGGCCCGGAGTTTAAGAGCTAAGCTGTAGGAAAGGGATCACCGTTC
TM1	A1	Targeting	ABHD13_+_108870692.23-P1P2	TGCAAGTGTACAAATCCAGCCCACCTTGTTGGCAGTGAGCCCCCGCGACGGGTTTAAGAGCTAAGCTGTAGGAAAGGGATCACCGTTC
TM1	A1	Targeting	ABHD13_+_108870695.23-P1P2	TGCAAGTGTACAAATCCAGCCCACCTTGTTGGTGCCAGTGAGCCCCCGCGAGTTTAAGAGCTAAGCTGTAGGAAAGGGATCACCGTTC
TM1	A1	Targeting	ABHD13_-_108870596.23-P1P2	TGCAAGTGTACAAATCCAGCCCACCTTGTTGGCCTCGGGTACGGAACTGGAGTTTAAGAGCTAAGCTGTAGGAAAGGGATCACCGTTC
TM1	A1	Targeting	ABHD13_-_108870639.23-P1P2	TGCAAGTGTACAAATCCAGCCCACCTTGTTGGGTGGAAGGCCAAGATCCCTGTTTAAGAGCTAAGCTGTAGGAAAGGGATCACCGTTC
TM1	A1	Targeting	ABHD13_-_108870652.23-P1P2	TGCAAGTGTACAAATCCAGCCCACCTTGTTGGATCCCTAGGTCCTGGAGCAGTTTAAGAGCTAAGCTGTAGGAAAGGGATCACCGTTC
TM1	A1	Targeting	ABHD13_-_108870764.23-P1P2	TGCAAGTGTACAAATCCAGCCCACCTTGTTGGCGGGCAGGGTTCCCACTCCGTTTAAGAGCTAAGCTGTAGGAAAGGGATCACCGTTC
TM1	A1	Targeting	ABHD14A_+_52008867.23-P1P2	TGCAAGTGTACAAATCCAGCCCACCTTGTTGGGGCCTGTATAATGGAGTTAGTTTAAGAGCTAAGCTGTAGGAAAGGGATCACCGTTC
TM1	A1	Targeting	ABHD14A_+_52008900.23-P1P2	TGCAAGTGTACAAATCCAGCCCACCTTGTTGGCAGTGGAACATCTCCACCCGTTTAAGAGCTAAGCTGTAGGAAAGGGATCACCGTTC
TM1	A1	Targeting	ABHD14A_+_52008930.23-P1P2	TGCAAGTGTACAAATCCAGCCCACCTTGTTGGGAGCCGGCGGAGAGCCATGGTTTAAGAGCTAAGCTGTAGGAAAGGGATCACCGTTC
TM1	A1	Targeting	ABHD14A_+_52008969.23-P1P2	TGCAAGTGTACAAATCCAGCCCACCTTGTTGGCGCTCCCCGCCCAGATTTTGTTTAAGAGCTAAGCTGTAGGAAAGGGATCACCGTTC
TM1	A1	Targeting	ABHD14A_+_52008993.23-P1P2	TGCAAGTGTACAAATCCAGCCCACCTTGTTGGGCAGAGCCCCAGCGCTCTCGTTTAAGAGCTAAGCTGTAGGAAAGGGATCACCGTTC
TM1	A1	Targeting	ABHD14A_+_52009025.23-P1P2	TGCAAGTGTACAAATCCAGCCCACCTTGTTGGACCGAGTCGTCTGCGTGGAGTTTAAGAGCTAAGCTGTAGGAAAGGGATCACCGTTC
TM1	A1	Targeting	ABHD14A_-_52008686.23-P1P2	TGCAAGTGTACAAATCCAGCCCACCTTGTTGGCAGCCCAGGCTCTGACCGTGTTTAAGAGCTAAGCTGTAGGAAAGGGATCACCGTTC
TM1	A1	Targeting	ABHD14A_-_52008702.23-P1P2	TGCAAGTGTACAAATCCAGCCCACCTTGTTGGCGTGGGTGTGCGTCGGGGAGTTTAAGAGCTAAGCTGTAGGAAAGGGATCACCGTTC
TM1	A1	Targeting	ABHD14A_-_52008842.23-P1P2	TGCAAGTGTACAAATCCAGCCCACCTTGTTGGGACCCGTCCTTAAGAACCTGTTTAAGAGCTAAGCTGTAGGAAAGGGATCACCGTTC
TM1	A1	Targeting	ABHD14A_-_52008948.23-P1P2	TGCAAGTGTACAAATCCAGCCCACCTTGTTGGAAGCCACATGGCTCTCCGCGTTTAAGAGCTAAGCTGTAGGAAAGGGATCACCGTTC
TM1	A1	Targeting	ABHD2_+_89631401.23-P1P2	TGCAAGTGTACAAATCCAGCCCACCTTGTTGGGATAAGGCCAGCCCGGAGTGTTTAAGAGCTAAGCTGTAGGAAAGGGATCACCGTTC
TM1	A1	Targeting	ABHD2_+_89631483.23-P1P2	TGCAAGTGTACAAATCCAGCCCACCTTGTTGGGTGGAGGCGGGATTCTTAGGTTTAAGAGCTAAGCTGTAGGAAAGGGATCACCGTTC
TM1	A1	Targeting	ABHD2_+_89631536.23-P1P2	TGCAAGTGTACAAATCCAGCCCACCTTGTTGGGCGCTCATTGCGTCTAGGAGTTTAAGAGCTAAGCTGTAGGAAAGGGATCACCGTTC
TM1	A1	Targeting	ABHD2_+_89631540.23-P1P2	TGCAAGTGTACAAATCCAGCCCACCTTGTTGGCCGCGCGCTCATTGCGTCTGTTTAAGAGCTAAGCTGTAGGAAAGGGATCACCGTTC
TM1	A1	Targeting	ABHD2_-_89631511.23-P1P2	TGCAAGTGTACAAATCCAGCCCACCTTGTTGGGAATCCCGCCTCCACTCTGGTTTAAGAGCTAAGCTGTAGGAAAGGGATCACCGTTC
TM1	A1	Targeting	ABHD2_-_89631532.23-P1P2	TGCAAGTGTACAAATCCAGCCCACCTTGTTGGGAACAGCTTCGCTGATCAAGTTTAAGAGCTAAGCTGTAGGAAAGGGATCACCGTTC
TM1	A1	Targeting	ABHD2_-_89631570.23-P1P2	TGCAAGTGTACAAATCCAGCCCACCTTGTTGGAATGAGCGCGCGGGGCAAGGTTTAAGAGCTAAGCTGTAGGAAAGGGATCACCGTTC
TM1	A1	Targeting	ABHD2_-_89631578.23-P1P2	TGCAAGTGTACAAATCCAGCCCACCTTGTTGGCGCGGGGCAAGTGGAGAAGGTTTAAGAGCTAAGCTGTAGGAAAGGGATCACCGTTC
TM1	A1	Targeting	ABHD2_-_89631602.23-P1P2	TGCAAGTGTACAAATCCAGCCCACCTTGTTGGGAACTGCCCAATGAACAAGGTTTAAGAGCTAAGCTGTAGGAAAGGGATCACCGTTC
TM1	A1	Targeting	ABHD2_-_89631642.23-P1P2	TGCAAGTGTACAAATCCAGCCCACCTTGTTGGTGGCAGAAGCGGTCGTCAGGTTTAAGAGCTAAGCTGTAGGAAAGGGATCACCGTTC
TM1	A1	Targeting	ACPP_+_132036046.23-P1P2	TGCAAGTGTACAAATCCAGCCCACCTTGTTGGCGGGGAAAGCTGTTGATCAGTTTAAGAGCTAAGCTGTAGGAAAGGGATCACCGTTC
TM1	A1	Targeting	ACPP_+_132036084.23-P1P2	TGCAAGTGTACAAATCCAGCCCACCTTGTTGGCAGTTTCCCCATTTAAGTTGTTTAAGAGCTAAGCTGTAGGAAAGGGATCACCGTTC
TM1	A1	Targeting	ACPP_+_132036148.23-P1P2	TGCAAGTGTACAAATCCAGCCCACCTTGTTGGAGGAAGCGTAGGGCAGGTTGTTTAAGAGCTAAGCTGTAGGAAAGGGATCACCGTTC
TM1	A1	Targeting	ACPP_+_132036153.23-P1P2	TGCAAGTGTACAAATCCAGCCCACCTTGTTGGTTTCCAGGAAGCGTAGGGCGTTTAAGAGCTAAGCTGTAGGAAAGGGATCACCGTTC
TM1	A1	Targeting	ACPP_+_132036157.23-P1P2	TGCAAGTGTACAAATCCAGCCCACCTTGTTGGAAAGTTTCCAGGAAGCGTAGTTTAAGAGCTAAGCTGTAGGAAAGGGATCACCGTTC
TM1	A1	Targeting	ACPP_+_132036167.23-P1P2	TGCAAGTGTACAAATCCAGCCCACCTTGTTGGCATAAGTAGTAAAGTTTCCGTTTAAGAGCTAAGCTGTAGGAAAGGGATCACCGTTC
TM1	A1	Targeting	ACPP_+_132036216.23-P1P2	TGCAAGTGTACAAATCCAGCCCACCTTGTTGGAGGGGAAGCTATTTAATTAGTTTAAGAGCTAAGCTGTAGGAAAGGGATCACCGTTC
TM1	A1	Targeting	ACPP_+_132036233.23-P1P2	TGCAAGTGTACAAATCCAGCCCACCTTGTTGGACTTCAAAAGCCTGTAGAGGTTTAAGAGCTAAGCTGTAGGAAAGGGATCACCGTTC
TM1	A1	Targeting	ACPP_-_132036074.23-P1P2	TGCAAGTGTACAAATCCAGCCCACCTTGTTGGCAACAGCTTTCCCCGCTCTGTTTAAGAGCTAAGCTGTAGGAAAGGGATCACCGTTC
TM1	A1	Targeting	ACPP_-_132036098.23-P1P2	TGCAAGTGTACAAATCCAGCCCACCTTGTTGGTTGGTGTCCTAACTTAAATGTTTAAGAGCTAAGCTGTAGGAAAGGGATCACCGTTC
TM1	A1	Targeting	ACVR1B_+_52345257.23-P1P2	TGCAAGTGTACAAATCCAGCCCACCTTGTTGGCACGCCTCGGCCAACTTCGGTTTAAGAGCTAAGCTGTAGGAAAGGGATCACCGTTC
TM1	A1	Targeting	ACVR1B_+_52345287.23-P1P2	TGCAAGTGTACAAATCCAGCCCACCTTGTTGGAGTGTCCCTGTTAAAGGGGGTTTAAGAGCTAAGCTGTAGGAAAGGGATCACCGTTC
TM1	A1	Targeting	ACVR1B_+_52345290.23-P1P2	TGCAAGTGTACAAATCCAGCCCACCTTGTTGGGGGAGTGTCCCTGTTAAAGGTTTAAGAGCTAAGCTGTAGGAAAGGGATCACCGTTC
TM1	A1	Targeting	ACVR1B_+_52345310.23-P1P2	TGCAAGTGTACAAATCCAGCCCACCTTGTTGGCGCGGGCGCCCGCCTTAAAGTTTAAGAGCTAAGCTGTAGGAAAGGGATCACCGTTC
TM1	A1	Targeting	ACVR1B_+_52345347.23-P1P2	TGCAAGTGTACAAATCCAGCCCACCTTGTTGGCGCCGCGCGCGCCCCCGAAGTTTAAGAGCTAAGCTGTAGGAAAGGGATCACCGTTC
TM1	A1	Targeting	ACVR1B_+_52345384.23-P1P2	TGCAAGTGTACAAATCCAGCCCACCTTGTTGGCCTGCACGTGCGCTCCCGGGTTTAAGAGCTAAGCTGTAGGAAAGGGATCACCGTTC
TM1	A1	Targeting	ACVR1B_-_52345222.23-P1P2	TGCAAGTGTACAAATCCAGCCCACCTTGTTGGAGGGAGGAGACTGCACGTTGTTTAAGAGCTAAGCTGTAGGAAAGGGATCACCGTTC
TM1	A1	Targeting	ACVR1B_-_52345228.23-P1P2	TGCAAGTGTACAAATCCAGCCCACCTTGTTGGGAGACTGCACGTTCGGCTCGTTTAAGAGCTAAGCTGTAGGAAAGGGATCACCGTTC
TM1	A1	Targeting	ACVR1B_-_52345303.23-P1P2	TGCAAGTGTACAAATCCAGCCCACCTTGTTGGCCCGCCCACCCCTTTAACAGTTTAAGAGCTAAGCTGTAGGAAAGGGATCACCGTTC
TM1	A1	Targeting	ACVR1B_-_52345415.23-P1P2	TGCAAGTGTACAAATCCAGCCCACCTTGTTGGCGCACGTGCAGGCGCCGGGGTTTAAGAGCTAAGCTGTAGGAAAGGGATCACCGTTC
TM1	A1	Targeting	ACVR1C_+_158485445.23-P1P2	TGCAAGTGTACAAATCCAGCCCACCTTGTTGGGCGGCTGCGAGAGGGCGCAGTTTAAGAGCTAAGCTGTAGGAAAGGGATCACCGTTC
TM1	A1	Targeting	ACVR1C_+_158485452.23-P1P2	TGCAAGTGTACAAATCCAGCCCACCTTGTTGGGGCCCGGGCGGCTGCGAGAGTTTAAGAGCTAAGCTGTAGGAAAGGGATCACCGTTC
TM1	A1	Targeting	ACVR1C_+_158485575.23-P1P2	TGCAAGTGTACAAATCCAGCCCACCTTGTTGGCCTGAGTATCTAGTCCCGGGTTTAAGAGCTAAGCTGTAGGAAAGGGATCACCGTTC
TM1	A1	Targeting	ACVR1C_+_158485677.23-P1P2	TGCAAGTGTACAAATCCAGCCCACCTTGTTGGTCTGCGGGAGGTTATAGAGGTTTAAGAGCTAAGCTGTAGGAAAGGGATCACCGTTC
TM1	A1	Targeting	ACVR1C_-_158485515.23-P1P2	TGCAAGTGTACAAATCCAGCCCACCTTGTTGGGCAAAGGCGGCCCTGTGCCGTTTAAGAGCTAAGCTGTAGGAAAGGGATCACCGTTC
TM1	A1	Targeting	ACVR1C_-_158485538.23-P1P2	TGCAAGTGTACAAATCCAGCCCACCTTGTTGGAGTGAGATCGCCCAGAGCTGTTTAAGAGCTAAGCTGTAGGAAAGGGATCACCGTTC
TM1	A1	Targeting	ACVR1C_-_158485560.23-P1P2	TGCAAGTGTACAAATCCAGCCCACCTTGTTGGGCGAAGAAAGAGGGGGCGTGTTTAAGAGCTAAGCTGTAGGAAAGGGATCACCGTTC
TM1	A1	Targeting	ACVR1C_-_158485601.23-P1P2	TGCAAGTGTACAAATCCAGCCCACCTTGTTGGGGGACTAGATACTCAGGAAGTTTAAGAGCTAAGCTGTAGGAAAGGGATCACCGTTC
TM1	A1	Targeting	ACVR1C_-_158485614.23-P1P2	TGCAAGTGTACAAATCCAGCCCACCTTGTTGGCAGGAATGGGGCTTCTCACGTTTAAGAGCTAAGCTGTAGGAAAGGGATCACCGTTC
TM1	A1	Targeting	ACVR1C_-_158485791.23-P1P2	TGCAAGTGTACAAATCCAGCCCACCTTGTTGGAGCCCCGCGGGCTTCCTACGTTTAAGAGCTAAGCTGTAGGAAAGGGATCACCGTTC
TM1	A1	Targeting	ACVR1_+_158732601.23-P1P2	TGCAAGTGTACAAATCCAGCCCACCTTGTTGGCTCCCCCGGCTCTTTCCCCGTTTAAGAGCTAAGCTGTAGGAAAGGGATCACCGTTC
TM1	A1	Targeting	ACVR1_+_158732795.23-P1P2	TGCAAGTGTACAAATCCAGCCCACCTTGTTGGGCAGCCTCCCCCTCGGCGCGTTTAAGAGCTAAGCTGTAGGAAAGGGATCACCGTTC
TM1	A1	Targeting	ACVR1_-_158732701.23-P1P2	TGCAAGTGTACAAATCCAGCCCACCTTGTTGGTCCCGAGGCGCAGAGGCTCGTTTAAGAGCTAAGCTGTAGGAAAGGGATCACCGTTC
TM1	A1	Targeting	ACVR1_-_158732725.23-P1P2	TGCAAGTGTACAAATCCAGCCCACCTTGTTGGGGGAGCACGACCGCGGGCGGTTTAAGAGCTAAGCTGTAGGAAAGGGATCACCGTTC
TM1	A1	Targeting	ACVR1_-_158732742.23-P1P2	TGCAAGTGTACAAATCCAGCCCACCTTGTTGGCGGGGCGGGCGGACCAGCTGTTTAAGAGCTAAGCTGTAGGAAAGGGATCACCGTTC
TM1	A1	Targeting	ACVR1_-_158732756.23-P1P2	TGCAAGTGTACAAATCCAGCCCACCTTGTTGGCAGCTGGGCTTGCCCCCGGGTTTAAGAGCTAAGCTGTAGGAAAGGGATCACCGTTC
TM1	A1	Targeting	ACVR1_-_158732809.23-P1P2	TGCAAGTGTACAAATCCAGCCCACCTTGTTGGAGTTCCCCCTGCGCCGAGGGTTTAAGAGCTAAGCTGTAGGAAAGGGATCACCGTTC
TM1	A1	Targeting	ACVR1_-_158732855.23-P1P2	TGCAAGTGTACAAATCCAGCCCACCTTGTTGGCAAAGAGCAGGAGCCGGAGGTTTAAGAGCTAAGCTGTAGGAAAGGGATCACCGTTC
TM1	A1	Targeting	ACVR1_-_158732916.23-P1P2	TGCAAGTGTACAAATCCAGCCCACCTTGTTGGCGCTCGGCCAATGAGTGTCGTTTAAGAGCTAAGCTGTAGGAAAGGGATCACCGTTC
TM1	A1	Targeting	ACVR1_-_158732970.23-P1P2	TGCAAGTGTACAAATCCAGCCCACCTTGTTGGTCCTCCCGGCGCGGATCCAGTTTAAGAGCTAAGCTGTAGGAAAGGGATCACCGTTC
TM1	A1	Targeting	ACVR2A_+_148601616.23-P1P2	TGCAAGTGTACAAATCCAGCCCACCTTGTTGGAGGAAGAGGACCCCGAGGTGTTTAAGAGCTAAGCTGTAGGAAAGGGATCACCGTTC
TM1	A1	Targeting	ACVR2A_+_148601904.23-P1P2	TGCAAGTGTACAAATCCAGCCCACCTTGTTGGCGGGGAAGCGAGGCGGGAGGTTTAAGAGCTAAGCTGTAGGAAAGGGATCACCGTTC
TM1	A1	Targeting	ACVR2A_+_148601913.23-P1P2	TGCAAGTGTACAAATCCAGCCCACCTTGTTGGGGAGATTGTCGGGGAAGCGGTTTAAGAGCTAAGCTGTAGGAAAGGGATCACCGTTC
TM1	A1	Targeting	ACVR2A_+_148601921.23-P1P2	TGCAAGTGTACAAATCCAGCCCACCTTGTTGGGAGCGCGAGGAGATTGTCGGTTTAAGAGCTAAGCTGTAGGAAAGGGATCACCGTTC
TM1	A1	Targeting	ACVR2A_+_148601943.23-P1P2	TGCAAGTGTACAAATCCAGCCCACCTTGTTGGCGCAGCGCGCGTGCCGGGCGTTTAAGAGCTAAGCTGTAGGAAAGGGATCACCGTTC
TM1	A1	Targeting	ACVR2A_+_148601947.23-P1P2	TGCAAGTGTACAAATCCAGCCCACCTTGTTGGCGGGCGCAGCGCGCGTGCCGTTTAAGAGCTAAGCTGTAGGAAAGGGATCACCGTTC
TM1	A1	Targeting	ACVR2A_+_148601997.23-P1P2	TGCAAGTGTACAAATCCAGCCCACCTTGTTGGGAGGAACGCTCGGCGGCAGGTTTAAGAGCTAAGCTGTAGGAAAGGGATCACCGTTC
TM1	A1	Targeting	ACVR2A_+_148602034.23-P1P2	TGCAAGTGTACAAATCCAGCCCACCTTGTTGGTCCGGTTCCGGCCCGAAGCGTTTAAGAGCTAAGCTGTAGGAAAGGGATCACCGTTC
TM1	A1	Targeting	ACVR2A_+_148602340.23-P1P2	TGCAAGTGTACAAATCCAGCCCACCTTGTTGGTGAGGCGACGAAGAGGCGGGTTTAAGAGCTAAGCTGTAGGAAAGGGATCACCGTTC
TM1	A1	Targeting	ACVR2A_-_148602063.23-P1P2	TGCAAGTGTACAAATCCAGCCCACCTTGTTGGGGGCCGGAACCGGAAGTTTGTTTAAGAGCTAAGCTGTAGGAAAGGGATCACCGTTC
TM1	A1	Targeting	ACVR2B_+_38495162.23-P1P2	TGCAAGTGTACAAATCCAGCCCACCTTGTTGGCGGGGCGCGCGGACGGAGGGTTTAAGAGCTAAGCTGTAGGAAAGGGATCACCGTTC
TM1	A1	Targeting	ACVR2B_+_38495193.23-P1P2	TGCAAGTGTACAAATCCAGCCCACCTTGTTGGCGCGCGTGCACCAACTTGCGTTTAAGAGCTAAGCTGTAGGAAAGGGATCACCGTTC
TM1	A1	Targeting	ACVR2B_+_38495249.23-P1P2	TGCAAGTGTACAAATCCAGCCCACCTTGTTGGCCCCAGAGAAACAACAACAGTTTAAGAGCTAAGCTGTAGGAAAGGGATCACCGTTC
TM1	A1	Targeting	ACVR2B_+_38495273.23-P1P2	TGCAAGTGTACAAATCCAGCCCACCTTGTTGGTCCGCGCCCCCCTGAGGGGGTTTAAGAGCTAAGCTGTAGGAAAGGGATCACCGTTC
TM1	A1	Targeting	ACVR2B_+_38495276.23-P1P2	TGCAAGTGTACAAATCCAGCCCACCTTGTTGGTGGTCCGCGCCCCCCTGAGGTTTAAGAGCTAAGCTGTAGGAAAGGGATCACCGTTC
TM1	A1	Targeting	ACVR2B_-_38494967.23-P1P2	TGCAAGTGTACAAATCCAGCCCACCTTGTTGGTAGAGATCCGACTTTCCCAGTTTAAGAGCTAAGCTGTAGGAAAGGGATCACCGTTC
TM1	A1	Targeting	ACVR2B_-_38495034.23-P1P2	TGCAAGTGTACAAATCCAGCCCACCTTGTTGGGGCGTCTGGGCCAGAGTCCGTTTAAGAGCTAAGCTGTAGGAAAGGGATCACCGTTC
TM1	A1	Targeting	ACVR2B_-_38495149.23-P1P2	TGCAAGTGTACAAATCCAGCCCACCTTGTTGGGCTCCCGGGCAAAGTGGTCGTTTAAGAGCTAAGCTGTAGGAAAGGGATCACCGTTC
TM1	A1	Targeting	ACVR2B_-_38495232.23-P1P2	TGCAAGTGTACAAATCCAGCCCACCTTGTTGGCGCGTCCTCCCACAGGGCGGTTTAAGAGCTAAGCTGTAGGAAAGGGATCACCGTTC
TM1	A1	Targeting	ACVR2B_-_38495238.23-P1P2	TGCAAGTGTACAAATCCAGCCCACCTTGTTGGCTCCCACAGGGCGCGGGATGTTTAAGAGCTAAGCTGTAGGAAAGGGATCACCGTTC
TM1	A1	Targeting	ACVRL1_+_52300550.23-P1P2	TGCAAGTGTACAAATCCAGCCCACCTTGTTGGCAGGGGTATACAGGCCCAGGTTTAAGAGCTAAGCTGTAGGAAAGGGATCACCGTTC
TM1	A1	Targeting	ACVRL1_+_52300558.23-P1P2	TGCAAGTGTACAAATCCAGCCCACCTTGTTGGACTCAGCACAGGGGTATACGTTTAAGAGCTAAGCTGTAGGAAAGGGATCACCGTTC
TM1	A1	Targeting	ACVRL1_+_52300726.23-P1P2	TGCAAGTGTACAAATCCAGCCCACCTTGTTGGAGGAGGCTTGCAGCAATGAGTTTAAGAGCTAAGCTGTAGGAAAGGGATCACCGTTC
TM1	A1	Targeting	ACVRL1_+_52300820.23-P1P2	TGCAAGTGTACAAATCCAGCCCACCTTGTTGGGGGAAGGGGCCACCGAGGAGTTTAAGAGCTAAGCTGTAGGAAAGGGATCACCGTTC
TM1	A1	Targeting	ACVRL1_-_52300534.23-P1P2	TGCAAGTGTACAAATCCAGCCCACCTTGTTGGAGGGCTCAAACCATCCTCAGTTTAAGAGCTAAGCTGTAGGAAAGGGATCACCGTTC
TM1	A1	Targeting	ACVRL1_-_52300545.23-P1P2	TGCAAGTGTACAAATCCAGCCCACCTTGTTGGCATCCTCAGGGCTAACCCAGTTTAAGAGCTAAGCTGTAGGAAAGGGATCACCGTTC
TM1	A1	Targeting	ACVRL1_-_52300556.23-P1P2	TGCAAGTGTACAAATCCAGCCCACCTTGTTGGCTAACCCAAGGCCGTCCTCGTTTAAGAGCTAAGCTGTAGGAAAGGGATCACCGTTC
TM1	A1	Targeting	ACVRL1_-_52300589.23-P1P2	TGCAAGTGTACAAATCCAGCCCACCTTGTTGGCCTGTGCTGAGTGCGGATCGTTTAAGAGCTAAGCTGTAGGAAAGGGATCACCGTTC
TM1	A1	Targeting	ACVRL1_-_52300594.23-P1P2	TGCAAGTGTACAAATCCAGCCCACCTTGTTGGGCTGAGTGCGGATCGGGAGGTTTAAGAGCTAAGCTGTAGGAAAGGGATCACCGTTC
TM1	A1	Targeting	ACVRL1_-_52300624.23-P1P2	TGCAAGTGTACAAATCCAGCCCACCTTGTTGGGACAGGAGGGGACAAATGGGTTTAAGAGCTAAGCTGTAGGAAAGGGATCACCGTTC
TM1	A1	Targeting	ADCK2_+_140372564.23-P1P2	TGCAAGTGTACAAATCCAGCCCACCTTGTTGGGAGATGGATGGGACGGGTTGTTTAAGAGCTAAGCTGTAGGAAAGGGATCACCGTTC
TM1	A1	Targeting	ADCK2_+_140372570.23-P1P2	TGCAAGTGTACAAATCCAGCCCACCTTGTTGGGCGCGGGAGATGGATGGGAGTTTAAGAGCTAAGCTGTAGGAAAGGGATCACCGTTC
TM1	A1	Targeting	ADCK2_+_140372574.23-P1P2	TGCAAGTGTACAAATCCAGCCCACCTTGTTGGAGGGGCGCGGGAGATGGATGTTTAAGAGCTAAGCTGTAGGAAAGGGATCACCGTTC
TM1	A1	Targeting	ADCK2_+_140372592.23-P1P2	TGCAAGTGTACAAATCCAGCCCACCTTGTTGGAGGGCTGTGGTGGAGCGGAGTTTAAGAGCTAAGCTGTAGGAAAGGGATCACCGTTC
TM1	A1	Targeting	ADCK2_+_140372619.23-P1P2	TGCAAGTGTACAAATCCAGCCCACCTTGTTGGGTGCAGGTGCAGGGAACCGGTTTAAGAGCTAAGCTGTAGGAAAGGGATCACCGTTC
TM1	A1	Targeting	ADCK2_+_140372650.23-P1P2	TGCAAGTGTACAAATCCAGCCCACCTTGTTGGGTCGGGGGCGGAGCGTCGGGTTTAAGAGCTAAGCTGTAGGAAAGGGATCACCGTTC
TM1	A1	Targeting	ADCK2_+_140372664.23-P1P2	TGCAAGTGTACAAATCCAGCCCACCTTGTTGGAGGGCGGGCGGAGCGTCGGGTTTAAGAGCTAAGCTGTAGGAAAGGGATCACCGTTC
TM1	A1	Targeting	ADCK2_+_140372683.23-P1P2	TGCAAGTGTACAAATCCAGCCCACCTTGTTGGAGGGCGGGGCGGAGCGTGGGTTTAAGAGCTAAGCTGTAGGAAAGGGATCACCGTTC
TM1	A1	Targeting	ADCK2_+_140372748.23-P1P2	TGCAAGTGTACAAATCCAGCCCACCTTGTTGGGGCCAGTATGAGATCGCTGGTTTAAGAGCTAAGCTGTAGGAAAGGGATCACCGTTC
TM1	A1	Targeting	ADCK2_+_140372825.23-P1P2	TGCAAGTGTACAAATCCAGCCCACCTTGTTGGGCGCCCGCGACCTGAGCGAGTTTAAGAGCTAAGCTGTAGGAAAGGGATCACCGTTC
TM1	A1	Targeting	ADCK5_+_145597444.23-P1P2	TGCAAGTGTACAAATCCAGCCCACCTTGTTGGATAATCCGGGGAGGGCTGAGTTTAAGAGCTAAGCTGTAGGAAAGGGATCACCGTTC
TM1	A1	Targeting	ADCK5_+_145597451.23-P1P2	TGCAAGTGTACAAATCCAGCCCACCTTGTTGGCACGTGGATAATCCGGGGAGTTTAAGAGCTAAGCTGTAGGAAAGGGATCACCGTTC
TM1	A1	Targeting	ADCK5_+_145597614.23-P1P2	TGCAAGTGTACAAATCCAGCCCACCTTGTTGGGTCGTGCCGGCCTCCGCGGGTTTAAGAGCTAAGCTGTAGGAAAGGGATCACCGTTC
TM1	A1	Targeting	ADCK5_+_145597626.23-P1P2	TGCAAGTGTACAAATCCAGCCCACCTTGTTGGGCCACGCCCCGAGTCGTGCGTTTAAGAGCTAAGCTGTAGGAAAGGGATCACCGTTC
TM1	A1	Targeting	ADCK5_-_145596369.23-P1P2	TGCAAGTGTACAAATCCAGCCCACCTTGTTGGGAGACACGCCATAACAGAAGTTTAAGAGCTAAGCTGTAGGAAAGGGATCACCGTTC
TM1	A1	Targeting	ADCK5_-_145597531.23-P1P2	TGCAAGTGTACAAATCCAGCCCACCTTGTTGGGGAATGCGCAGTGCGCCGAGTTTAAGAGCTAAGCTGTAGGAAAGGGATCACCGTTC
TM1	A1	Targeting	ADCK5_-_145597557.23-P1P2	TGCAAGTGTACAAATCCAGCCCACCTTGTTGGACTGGAACCCTCCGCTCTCGTTTAAGAGCTAAGCTGTAGGAAAGGGATCACCGTTC
TM1	A1	Targeting	ADCK5_-_145597560.23-P1P2	TGCAAGTGTACAAATCCAGCCCACCTTGTTGGGGAACCCTCCGCTCTCAGGGTTTAAGAGCTAAGCTGTAGGAAAGGGATCACCGTTC
TM1	A1	Targeting	ADCK5_-_145597595.23-P1P2	TGCAAGTGTACAAATCCAGCCCACCTTGTTGGCCAAAAGGTAAGCCTCTGGGTTTAAGAGCTAAGCTGTAGGAAAGGGATCACCGTTC
TM1	A1	Targeting	ADCK5_-_145597641.23-P1P2	TGCAAGTGTACAAATCCAGCCCACCTTGTTGGCGGAGGCCGGCACGACTCGGTTTAAGAGCTAAGCTGTAGGAAAGGGATCACCGTTC
TM1	A1	Targeting	ADIG_+_37209411.23-P1P2	TGCAAGTGTACAAATCCAGCCCACCTTGTTGGTGCCCACGTCCACACTTGGGTTTAAGAGCTAAGCTGTAGGAAAGGGATCACCGTTC
TM1	A1	Targeting	ADIG_+_37209602.23-P1P2	TGCAAGTGTACAAATCCAGCCCACCTTGTTGGTCTCAGTCCAGTAGCTATTGTTTAAGAGCTAAGCTGTAGGAAAGGGATCACCGTTC
TM1	A1	Targeting	ADIG_+_37209702.23-P1P2	TGCAAGTGTACAAATCCAGCCCACCTTGTTGGGAGAGCTGTTCTGGATGAAGTTTAAGAGCTAAGCTGTAGGAAAGGGATCACCGTTC
TM1	A1	Targeting	ADIG_+_37209723.23-P1P2	TGCAAGTGTACAAATCCAGCCCACCTTGTTGGCATGCAGGGGACACTTTGAGTTTAAGAGCTAAGCTGTAGGAAAGGGATCACCGTTC
TM1	A1	Targeting	ADIG_+_37209824.23-P1P2	TGCAAGTGTACAAATCCAGCCCACCTTGTTGGCTGCCCCATGGGACCTGGCGTTTAAGAGCTAAGCTGTAGGAAAGGGATCACCGTTC
TM1	A1	Targeting	ADIG_-_37209430.23-P1P2	TGCAAGTGTACAAATCCAGCCCACCTTGTTGGCCCCACCAAGTGTGGACGTGTTTAAGAGCTAAGCTGTAGGAAAGGGATCACCGTTC
TM1	A1	Targeting	ADIG_-_37209481.23-P1P2	TGCAAGTGTACAAATCCAGCCCACCTTGTTGGGACCCAGCTGGCTCCTGGAGTTTAAGAGCTAAGCTGTAGGAAAGGGATCACCGTTC
TM1	A1	Targeting	ADIG_-_37209590.23-P1P2	TGCAAGTGTACAAATCCAGCCCACCTTGTTGGTTACAAGAAAAAGGGTCAGGTTTAAGAGCTAAGCTGTAGGAAAGGGATCACCGTTC
TM1	A1	Targeting	ADIG_-_37209653.23-P1P2	TGCAAGTGTACAAATCCAGCCCACCTTGTTGGCAGGCCTGCCTGGAAACCTGTTTAAGAGCTAAGCTGTAGGAAAGGGATCACCGTTC
TM1	A1	Targeting	ADIG_-_37209801.23-P1P2	TGCAAGTGTACAAATCCAGCCCACCTTGTTGGTCACAGCTTAGTCACAGTTGTTTAAGAGCTAAGCTGTAGGAAAGGGATCACCGTTC
TM1	A1	Targeting	AGER_+_32152088.23-P1P2	TGCAAGTGTACAAATCCAGCCCACCTTGTTGGTGACAAGACGACTGAAAGAGTTTAAGAGCTAAGCTGTAGGAAAGGGATCACCGTTC
TM1	A1	Targeting	AGER_+_32152132.23-P1P2	TGCAAGTGTACAAATCCAGCCCACCTTGTTGGTGAAGGACTCTTGTCCCAAGTTTAAGAGCTAAGCTGTAGGAAAGGGATCACCGTTC
TM1	A1	Targeting	AGER_+_32152177.23-P1P2	TGCAAGTGTACAAATCCAGCCCACCTTGTTGGGCTGGTAGTACCCAGGGGTGTTTAAGAGCTAAGCTGTAGGAAAGGGATCACCGTTC
TM1	A1	Targeting	AGER_+_32152182.23-P1P2	TGCAAGTGTACAAATCCAGCCCACCTTGTTGGCAGAGGCTGGTAGTACCCAGTTTAAGAGCTAAGCTGTAGGAAAGGGATCACCGTTC
TM1	A1	Targeting	AGER_+_32152198.23-P1P2	TGCAAGTGTACAAATCCAGCCCACCTTGTTGGGGGAAGTGACTGTACCCAGGTTTAAGAGCTAAGCTGTAGGAAAGGGATCACCGTTC
TM1	A1	Targeting	AGER_+_32152264.23-P1P2	TGCAAGTGTACAAATCCAGCCCACCTTGTTGGATGGAATAAATAGGATCGGGTTTAAGAGCTAAGCTGTAGGAAAGGGATCACCGTTC
TM1	A1	Targeting	AGER_+_32152282.23-P1P2	TGCAAGTGTACAAATCCAGCCCACCTTGTTGGGGCAGCCCTGATGGACTGAGTTTAAGAGCTAAGCTGTAGGAAAGGGATCACCGTTC
TM1	A1	Targeting	AGER_+_32152290.23-P1P2	TGCAAGTGTACAAATCCAGCCCACCTTGTTGGGGTCACCAGGCAGCCCTGAGTTTAAGAGCTAAGCTGTAGGAAAGGGATCACCGTTC
TM1	A1	Targeting	AGER_-_32152066.23-P1P2	TGCAAGTGTACAAATCCAGCCCACCTTGTTGGGTGGCCTCCGCCCTAGGTGGTTTAAGAGCTAAGCTGTAGGAAAGGGATCACCGTTC
TM1	A1	Targeting	AGER_-_32152247.23-P1P2	TGCAAGTGTACAAATCCAGCCCACCTTGTTGGATGGGGAGTGTACCCTCTAGTTTAAGAGCTAAGCTGTAGGAAAGGGATCACCGTTC
TM1	A1	Targeting	AJAP1_+_4714336.23-P1P2	TGCAAGTGTACAAATCCAGCCCACCTTGTTGGCCGCCGGATGGTGTTGCCAGTTTAAGAGCTAAGCTGTAGGAAAGGGATCACCGTTC
TM1	A1	Targeting	AJAP1_+_4714455.23-P1P2	TGCAAGTGTACAAATCCAGCCCACCTTGTTGGAGGGGCGACAGCGCAGGCGGTTTAAGAGCTAAGCTGTAGGAAAGGGATCACCGTTC
TM1	A1	Targeting	AJAP1_+_4714491.23-P1P2	TGCAAGTGTACAAATCCAGCCCACCTTGTTGGGGGTCGCCGCGGGTGGTGGGTTTAAGAGCTAAGCTGTAGGAAAGGGATCACCGTTC
TM1	A1	Targeting	AJAP1_+_4714516.23-P1P2	TGCAAGTGTACAAATCCAGCCCACCTTGTTGGTCGCCGCCCCACCTTGCGGGTTTAAGAGCTAAGCTGTAGGAAAGGGATCACCGTTC
TM1	A1	Targeting	AJAP1_+_4714556.23-P1P2	TGCAAGTGTACAAATCCAGCCCACCTTGTTGGGAACGGGAGCTCGAGCCCCGTTTAAGAGCTAAGCTGTAGGAAAGGGATCACCGTTC
TM1	A1	Targeting	AJAP1_-_4714137.23-P1P2	TGCAAGTGTACAAATCCAGCCCACCTTGTTGGGAGCAGAGGAGTCCCTCGTGTTTAAGAGCTAAGCTGTAGGAAAGGGATCACCGTTC
TM1	A1	Targeting	AJAP1_-_4714303.23-P1P2	TGCAAGTGTACAAATCCAGCCCACCTTGTTGGGGCGCCCCCGTAACCGGGTGTTTAAGAGCTAAGCTGTAGGAAAGGGATCACCGTTC
TM1	A1	Targeting	AJAP1_-_4714530.23-P1P2	TGCAAGTGTACAAATCCAGCCCACCTTGTTGGACCCCGGCCCCCGCAAGGTGTTTAAGAGCTAAGCTGTAGGAAAGGGATCACCGTTC
TM1	A1	Targeting	AJAP1_-_4714542.23-P1P2	TGCAAGTGTACAAATCCAGCCCACCTTGTTGGGCAAGGTGGGGCGGCGAGCGTTTAAGAGCTAAGCTGTAGGAAAGGGATCACCGTTC
TM1	A1	Targeting	AJAP1_-_4714582.23-P1P2	TGCAAGTGTACAAATCCAGCCCACCTTGTTGGGGCTCGAGCTCCCGTTCGAGTTTAAGAGCTAAGCTGTAGGAAAGGGATCACCGTTC
TM1	A1	Targeting	ALCAM_+_105085530.23-P1P2	TGCAAGTGTACAAATCCAGCCCACCTTGTTGGGTCCTGGAGCCCGGATGAGGTTTAAGAGCTAAGCTGTAGGAAAGGGATCACCGTTC
TM1	A1	Targeting	ALCAM_+_105085545.23-P1P2	TGCAAGTGTACAAATCCAGCCCACCTTGTTGGGAACCGCGTGCCCCGGTCCGTTTAAGAGCTAAGCTGTAGGAAAGGGATCACCGTTC
TM1	A1	Targeting	ALCAM_+_105085551.23-P1P2	TGCAAGTGTACAAATCCAGCCCACCTTGTTGGCAGGGAGAACCGCGTGCCCGTTTAAGAGCTAAGCTGTAGGAAAGGGATCACCGTTC
TM1	A1	Targeting	ALCAM_-_105085311.23-P1P2	TGCAAGTGTACAAATCCAGCCCACCTTGTTGGCGGCGGAGAAAAATCTCTGGTTTAAGAGCTAAGCTGTAGGAAAGGGATCACCGTTC
TM1	A1	Targeting	ALCAM_-_105085416.23-P1P2	TGCAAGTGTACAAATCCAGCCCACCTTGTTGGAGCCAGAGGCCTTATCACTGTTTAAGAGCTAAGCTGTAGGAAAGGGATCACCGTTC
TM1	A1	Targeting	ALCAM_-_105085450.23-P1P2	TGCAAGTGTACAAATCCAGCCCACCTTGTTGGCACAGAAAGTGTTAGTCCCGTTTAAGAGCTAAGCTGTAGGAAAGGGATCACCGTTC
TM1	A1	Targeting	ALCAM_-_105085579.23-P1P2	TGCAAGTGTACAAATCCAGCCCACCTTGTTGGACGCGGTTCTCCCTGATCCGTTTAAGAGCTAAGCTGTAGGAAAGGGATCACCGTTC
TM1	A1	Targeting	ALCAM_-_105085585.23-P1P2	TGCAAGTGTACAAATCCAGCCCACCTTGTTGGTTCTCCCTGATCCCGGAGCGTTTAAGAGCTAAGCTGTAGGAAAGGGATCACCGTTC
TM1	A1	Targeting	ALCAM_-_105085628.23-P1P2	TGCAAGTGTACAAATCCAGCCCACCTTGTTGGCTGCAGCGCCTCTAGGCTGGTTTAAGAGCTAAGCTGTAGGAAAGGGATCACCGTTC
TM1	A1	Targeting	ALCAM_-_105085675.23-P1P2	TGCAAGTGTACAAATCCAGCCCACCTTGTTGGCGCTGCGTCCGGGGAAGTGGTTTAAGAGCTAAGCTGTAGGAAAGGGATCACCGTTC
TM1	A1	Targeting	ALK_+_30144556.23-P1P2	TGCAAGTGTACAAATCCAGCCCACCTTGTTGGAGGCCGGACTGCGTGGGTCGTTTAAGAGCTAAGCTGTAGGAAAGGGATCACCGTTC
TM1	A1	Targeting	ALK_+_30144561.23-P1P2	TGCAAGTGTACAAATCCAGCCCACCTTGTTGGGGGCGAGGCCGGACTGCGTGTTTAAGAGCTAAGCTGTAGGAAAGGGATCACCGTTC
TM1	A1	Targeting	ALK_+_30144627.23-P1P2	TGCAAGTGTACAAATCCAGCCCACCTTGTTGGGGCCTCTGCAGATTTGCATGTTTAAGAGCTAAGCTGTAGGAAAGGGATCACCGTTC
TM1	A1	Targeting	ALK_+_30144690.23-P1P2	TGCAAGTGTACAAATCCAGCCCACCTTGTTGGGAGACTGGAGAGGGAACAGGTTTAAGAGCTAAGCTGTAGGAAAGGGATCACCGTTC
TM1	A1	Targeting	ALK_+_30144704.23-P1P2	TGCAAGTGTACAAATCCAGCCCACCTTGTTGGGAGGGGAAGAACAAGAGACGTTTAAGAGCTAAGCTGTAGGAAAGGGATCACCGTTC
TM1	A1	Targeting	ALK_+_30144725.23-P1P2	TGCAAGTGTACAAATCCAGCCCACCTTGTTGGAATAGGGCAGGGAATCTAGGTTTAAGAGCTAAGCTGTAGGAAAGGGATCACCGTTC
TM1	A1	Targeting	ALK_-_30144574.23-P1P2	TGCAAGTGTACAAATCCAGCCCACCTTGTTGGCTGCCCGACCCACGCAGTCGTTTAAGAGCTAAGCTGTAGGAAAGGGATCACCGTTC
TM1	A1	Targeting	ALK_-_30144610.23-P1P2	TGCAAGTGTACAAATCCAGCCCACCTTGTTGGACCCGCACCCTCCAACCAAGTTTAAGAGCTAAGCTGTAGGAAAGGGATCACCGTTC
TM1	A1	Targeting	ALK_-_30144615.23-P1P2	TGCAAGTGTACAAATCCAGCCCACCTTGTTGGCACCCTCCAACCAATGGCGGTTTAAGAGCTAAGCTGTAGGAAAGGGATCACCGTTC
TM1	A1	Targeting	ALK_-_30144646.23-P1P2	TGCAAGTGTACAAATCCAGCCCACCTTGTTGGCTCCTATGCAAATCTGCAGGTTTAAGAGCTAAGCTGTAGGAAAGGGATCACCGTTC
TM1	A1	Targeting	AMICA1_+_118095915.23-P1P2	TGCAAGTGTACAAATCCAGCCCACCTTGTTGGCTGAAGAGGTCTGAGTGTGGTTTAAGAGCTAAGCTGTAGGAAAGGGATCACCGTTC
TM1	A1	Targeting	AMICA1_+_118095928.23-P1P2	TGCAAGTGTACAAATCCAGCCCACCTTGTTGGGGGGAGATGGCACCTGAAGGTTTAAGAGCTAAGCTGTAGGAAAGGGATCACCGTTC
TM1	A1	Targeting	AMICA1_+_118095940.23-P1P2	TGCAAGTGTACAAATCCAGCCCACCTTGTTGGTGTCATCTAAAAGGGGAGAGTTTAAGAGCTAAGCTGTAGGAAAGGGATCACCGTTC
TM1	A1	Targeting	AMICA1_+_118095946.23-P1P2	TGCAAGTGTACAAATCCAGCCCACCTTGTTGGAGGGCTTGTCATCTAAAAGGTTTAAGAGCTAAGCTGTAGGAAAGGGATCACCGTTC
TM1	A1	Targeting	AMICA1_+_118096258.23-P1P2	TGCAAGTGTACAAATCCAGCCCACCTTGTTGGTCACCCAAGAGGTTCTCTAGTTTAAGAGCTAAGCTGTAGGAAAGGGATCACCGTTC
TM1	A1	Targeting	AMICA1_-_118095825.23-P1P2	TGCAAGTGTACAAATCCAGCCCACCTTGTTGGAACAGGAACCTCTAAATCAGTTTAAGAGCTAAGCTGTAGGAAAGGGATCACCGTTC
TM1	A1	Targeting	AMICA1_-_118095910.23-P1P2	TGCAAGTGTACAAATCCAGCCCACCTTGTTGGTGACAAATTCAACCTACTGGTTTAAGAGCTAAGCTGTAGGAAAGGGATCACCGTTC
TM1	A1	Targeting	AMICA1_-_118095989.23-P1P2	TGCAAGTGTACAAATCCAGCCCACCTTGTTGGCTGAGGGTAGGAGCTTGAAGTTTAAGAGCTAAGCTGTAGGAAAGGGATCACCGTTC
TM1	A1	Targeting	AMICA1_-_118095996.23-P1P2	TGCAAGTGTACAAATCCAGCCCACCTTGTTGGTAGGAGCTTGAATGGCACCGTTTAAGAGCTAAGCTGTAGGAAAGGGATCACCGTTC
TM1	A1	Targeting	AMICA1_-_118096004.23-P1P2	TGCAAGTGTACAAATCCAGCCCACCTTGTTGGTGAATGGCACCAGGCAAATGTTTAAGAGCTAAGCTGTAGGAAAGGGATCACCGTTC
TM1	A1	Targeting	AMIGO1_+_110052371.23-P1P2	TGCAAGTGTACAAATCCAGCCCACCTTGTTGGACGCGCCCCGAGGCTCCGGGTTTAAGAGCTAAGCTGTAGGAAAGGGATCACCGTTC
TM1	A1	Targeting	AMIGO1_+_110052374.23-P1P2	TGCAAGTGTACAAATCCAGCCCACCTTGTTGGCGCACGCGCCCCGAGGCTCGTTTAAGAGCTAAGCTGTAGGAAAGGGATCACCGTTC
TM1	A1	Targeting	AMIGO1_+_110052467.23-P1P2	TGCAAGTGTACAAATCCAGCCCACCTTGTTGGTCCGGAGCTCGCTGGTTGAGTTTAAGAGCTAAGCTGTAGGAAAGGGATCACCGTTC
TM1	A1	Targeting	AMIGO1_+_110052542.23-P1P2	TGCAAGTGTACAAATCCAGCCCACCTTGTTGGGGGATGGAGGAAGTTATAGGTTTAAGAGCTAAGCTGTAGGAAAGGGATCACCGTTC
TM1	A1	Targeting	AMIGO1_+_110052579.23-P1P2	TGCAAGTGTACAAATCCAGCCCACCTTGTTGGTGTGTAGCGAGAAGGGTGCGTTTAAGAGCTAAGCTGTAGGAAAGGGATCACCGTTC
TM1	A1	Targeting	AMIGO1_+_110052585.23-P1P2	TGCAAGTGTACAAATCCAGCCCACCTTGTTGGCCGGTCTGTGTAGCGAGAAGTTTAAGAGCTAAGCTGTAGGAAAGGGATCACCGTTC
TM1	A1	Targeting	AMIGO1_-_110052338.23-P1P2	TGCAAGTGTACAAATCCAGCCCACCTTGTTGGCCAGCGGAGGGAGCGGCGTGTTTAAGAGCTAAGCTGTAGGAAAGGGATCACCGTTC
TM1	A1	Targeting	AMIGO1_-_110052441.23-P1P2	TGCAAGTGTACAAATCCAGCCCACCTTGTTGGCGTGTGTTTGTGTCGGAGCGTTTAAGAGCTAAGCTGTAGGAAAGGGATCACCGTTC
TM1	A1	Targeting	AMIGO1_-_110052487.23-P1P2	TGCAAGTGTACAAATCCAGCCCACCTTGTTGGTCCCTCAACCAGCGAGCTCGTTTAAGAGCTAAGCTGTAGGAAAGGGATCACCGTTC
TM1	A1	Targeting	AMIGO1_-_110052524.23-P1P2	TGCAAGTGTACAAATCCAGCCCACCTTGTTGGCGAAAATTGGCAGGAAGAGGTTTAAGAGCTAAGCTGTAGGAAAGGGATCACCGTTC
TM1	A1	Targeting	AMIGO2_+_47473623.23-P1P2	TGCAAGTGTACAAATCCAGCCCACCTTGTTGGTCCTGCAGCCTCCCGAGTGGTTTAAGAGCTAAGCTGTAGGAAAGGGATCACCGTTC
TM1	A1	Targeting	AMIGO2_+_47473819.23-P1P2	TGCAAGTGTACAAATCCAGCCCACCTTGTTGGGGGCGGTATGAGGGGGCGCGTTTAAGAGCTAAGCTGTAGGAAAGGGATCACCGTTC
TM1	A1	Targeting	AMIGO2_+_47473827.23-P1P2	TGCAAGTGTACAAATCCAGCCCACCTTGTTGGAGGCCGCGGGGCGGTATGAGTTTAAGAGCTAAGCTGTAGGAAAGGGATCACCGTTC
TM1	A1	Targeting	AMIGO2_+_47473987.23-P1P2	TGCAAGTGTACAAATCCAGCCCACCTTGTTGGCTGGACGAAGGGACGTAATGTTTAAGAGCTAAGCTGTAGGAAAGGGATCACCGTTC
TM1	A1	Targeting	AMIGO2_-_47473572.23-P1P2	TGCAAGTGTACAAATCCAGCCCACCTTGTTGGCGCCCCGCTCCCAGAGCCGGTTTAAGAGCTAAGCTGTAGGAAAGGGATCACCGTTC
TM1	A1	Targeting	AMIGO2_-_47473815.23-P1P2	TGCAAGTGTACAAATCCAGCCCACCTTGTTGGGCGGCGCAGCCAATCCGAGGTTTAAGAGCTAAGCTGTAGGAAAGGGATCACCGTTC
TM1	A1	Targeting	AMIGO2_-_47473941.23-P1P2	TGCAAGTGTACAAATCCAGCCCACCTTGTTGGGGGCAGGGGTCCACACCAGGTTTAAGAGCTAAGCTGTAGGAAAGGGATCACCGTTC
TM1	A1	Targeting	AMIGO2_-_47474031.23-P1P2	TGCAAGTGTACAAATCCAGCCCACCTTGTTGGTCCAAGCCGGGCGGTAATGGTTTAAGAGCTAAGCTGTAGGAAAGGGATCACCGTTC
TM1	A1	Targeting	AMIGO2_-_47474037.23-P1P2	TGCAAGTGTACAAATCCAGCCCACCTTGTTGGCCGGGCGGTAATGGGGTCCGTTTAAGAGCTAAGCTGTAGGAAAGGGATCACCGTTC
TM1	A1	Targeting	AMIGO2_-_47474050.23-P1P2	TGCAAGTGTACAAATCCAGCCCACCTTGTTGGGGGTCCAGGAAGGCTAAAGGTTTAAGAGCTAAGCTGTAGGAAAGGGATCACCGTTC
TM1	A1	Targeting	AMIGO3_+_49757138.23-P2	TGCAAGTGTACAAATCCAGCCCACCTTGTTGGGCCCCTGGGGGGAGTATTTGTTTAAGAGCTAAGCTGTAGGAAAGGGATCACCGTTC
TM1	A1	Targeting	AMIGO3_+_49757172.23-P2	TGCAAGTGTACAAATCCAGCCCACCTTGTTGGTCCTCAAACGGGAACCAATGTTTAAGAGCTAAGCTGTAGGAAAGGGATCACCGTTC
TM1	A1	Targeting	AMIGO3_+_49757183.23-P2	TGCAAGTGTACAAATCCAGCCCACCTTGTTGGGCCGCCCCGCCTCCTCAAAGTTTAAGAGCTAAGCTGTAGGAAAGGGATCACCGTTC
TM1	A1	Targeting	AMIGO3_+_49757210.23-P2	TGCAAGTGTACAAATCCAGCCCACCTTGTTGGCGGGGCCATTGGGCACAAAGTTTAAGAGCTAAGCTGTAGGAAAGGGATCACCGTTC
TM1	A1	Targeting	AMIGO3_+_49757262.23-P2	TGCAAGTGTACAAATCCAGCCCACCTTGTTGGAAAGGCTGACGGGGACTTTGTTTAAGAGCTAAGCTGTAGGAAAGGGATCACCGTTC
TM1	A1	Targeting	AMIGO3_+_49757297.23-P2	TGCAAGTGTACAAATCCAGCCCACCTTGTTGGCCCGAGGAAAAACGAGCGGGTTTAAGAGCTAAGCTGTAGGAAAGGGATCACCGTTC
TM1	A1	Targeting	AMIGO3_+_49757300.23-P2	TGCAAGTGTACAAATCCAGCCCACCTTGTTGGCTCCCCGAGGAAAAACGAGGTTTAAGAGCTAAGCTGTAGGAAAGGGATCACCGTTC
TM1	A1	Targeting	AMIGO3_+_49761435.23-P1	TGCAAGTGTACAAATCCAGCCCACCTTGTTGGGGCGGCCGTGCCACGTACGGTTTAAGAGCTAAGCTGTAGGAAAGGGATCACCGTTC
TM1	A1	Targeting	AMIGO3_+_49761525.23-P1	TGCAAGTGTACAAATCCAGCCCACCTTGTTGGGTCCCGGCCCGGGTCTCCAGTTTAAGAGCTAAGCTGTAGGAAAGGGATCACCGTTC
TM1	A1	Targeting	AMIGO3_+_49761540.23-P1	TGCAAGTGTACAAATCCAGCCCACCTTGTTGGCCAGCTGACCCGCGGGTCCGTTTAAGAGCTAAGCTGTAGGAAAGGGATCACCGTTC
TM1	A1	Targeting	AMIGO3_+_49761547.23-P1	TGCAAGTGTACAAATCCAGCCCACCTTGTTGGCCAATGGCCAGCTGACCCGGTTTAAGAGCTAAGCTGTAGGAAAGGGATCACCGTTC
TM1	A1	Targeting	AMIGO3_-_49757179.23-P2	TGCAAGTGTACAAATCCAGCCCACCTTGTTGGGCGGGGCCCGGGCTCCTATGTTTAAGAGCTAAGCTGTAGGAAAGGGATCACCGTTC
TM1	A1	Targeting	AMIGO3_-_49757247.23-P2	TGCAAGTGTACAAATCCAGCCCACCTTGTTGGGCCCCGCATGACCGCCAGAGTTTAAGAGCTAAGCTGTAGGAAAGGGATCACCGTTC
TM1	A1	Targeting	AMIGO3_-_49757331.23-P2	TGCAAGTGTACAAATCCAGCCCACCTTGTTGGTTCCTCGGGGAGTAAAAGGGTTTAAGAGCTAAGCTGTAGGAAAGGGATCACCGTTC
TM1	A1	Targeting	AMIGO3_-_49761472.23-P1	TGCAAGTGTACAAATCCAGCCCACCTTGTTGGGCCGCCGGCGTCGGAACGTGTTTAAGAGCTAAGCTGTAGGAAAGGGATCACCGTTC
TM1	A1	Targeting	AMIGO3_-_49761520.23-P1	TGCAAGTGTACAAATCCAGCCCACCTTGTTGGAATGAGCGCCCGAGTACGCGTTTAAGAGCTAAGCTGTAGGAAAGGGATCACCGTTC
TM1	A1	Targeting	AMIGO3_-_49761530.23-P1	TGCAAGTGTACAAATCCAGCCCACCTTGTTGGCGAGTACGCCGGGCTGCCAGTTTAAGAGCTAAGCTGTAGGAAAGGGATCACCGTTC
TM1	A1	Targeting	AMIGO3_-_49761543.23-P1	TGCAAGTGTACAAATCCAGCCCACCTTGTTGGCTGCCATGGAGACCCGGGCGTTTAAGAGCTAAGCTGTAGGAAAGGGATCACCGTTC
TM1	A1	Targeting	AMIGO3_-_49761580.23-P1	TGCAAGTGTACAAATCCAGCCCACCTTGTTGGTGGCCATTGGCGGATCCAAGTTTAAGAGCTAAGCTGTAGGAAAGGGATCACCGTTC
TM1	A1	Targeting	AMIGO3_-_49761683.23-P1	TGCAAGTGTACAAATCCAGCCCACCTTGTTGGCTCGCCCCGAGGGTGACCAGTTTAAGAGCTAAGCTGTAGGAAAGGGATCACCGTTC
TM1	A1	Targeting	AMN_+_103388454.23-P1	TGCAAGTGTACAAATCCAGCCCACCTTGTTGGTGGACGCATGGCAGATGAAGTTTAAGAGCTAAGCTGTAGGAAAGGGATCACCGTTC
TM1	A1	Targeting	AMN_+_103388894.23-P1	TGCAAGTGTACAAATCCAGCCCACCTTGTTGGCGCCCAGGGCCGACTCTTCGTTTAAGAGCTAAGCTGTAGGAAAGGGATCACCGTTC
TM1	A1	Targeting	AMN_+_103388907.23-P1	TGCAAGTGTACAAATCCAGCCCACCTTGTTGGTTACCTCCAGACCCGCCCAGTTTAAGAGCTAAGCTGTAGGAAAGGGATCACCGTTC
TM1	A1	Targeting	AMN_+_103388960.23-P1	TGCAAGTGTACAAATCCAGCCCACCTTGTTGGTGGACCCACGTGACCAGGCGTTTAAGAGCTAAGCTGTAGGAAAGGGATCACCGTTC
TM1	A1	Targeting	AMN_+_103394740.23-P2	TGCAAGTGTACAAATCCAGCCCACCTTGTTGGCTGCAAGAGACACGGGCTGGTTTAAGAGCTAAGCTGTAGGAAAGGGATCACCGTTC
TM1	A1	Targeting	AMN_+_103394833.23-P2	TGCAAGTGTACAAATCCAGCCCACCTTGTTGGCTCACCCGCGCCACAGTCCGTTTAAGAGCTAAGCTGTAGGAAAGGGATCACCGTTC
TM1	A1	Targeting	AMN_-_103388871.23-P1	TGCAAGTGTACAAATCCAGCCCACCTTGTTGGTGCAGGGGCGGGTAAGGGGGTTTAAGAGCTAAGCTGTAGGAAAGGGATCACCGTTC
TM1	A1	Targeting	AMN_-_103388893.23-P1	TGCAAGTGTACAAATCCAGCCCACCTTGTTGGCTGAGAAGGTGCCTCCCAGGTTTAAGAGCTAAGCTGTAGGAAAGGGATCACCGTTC
TM1	A1	Targeting	AMN_-_103388906.23-P1	TGCAAGTGTACAAATCCAGCCCACCTTGTTGGTCCCAGGGGCCTGAAGAGTGTTTAAGAGCTAAGCTGTAGGAAAGGGATCACCGTTC
TM1	A1	Targeting	AMN_-_103388912.23-P1	TGCAAGTGTACAAATCCAGCCCACCTTGTTGGGGGCCTGAAGAGTCGGCCCGTTTAAGAGCTAAGCTGTAGGAAAGGGATCACCGTTC
TM1	A1	Targeting	AMN_-_103388977.23-P1	TGCAAGTGTACAAATCCAGCCCACCTTGTTGGCCGACCTGCCTGGTCACGTGTTTAAGAGCTAAGCTGTAGGAAAGGGATCACCGTTC
TM1	A1	Targeting	AMN_-_103388987.23-P1	TGCAAGTGTACAAATCCAGCCCACCTTGTTGGTGGTCACGTGGGTCCAGTGGTTTAAGAGCTAAGCTGTAGGAAAGGGATCACCGTTC
TM1	A1	Targeting	AMN_-_103394799.23-P2	TGCAAGTGTACAAATCCAGCCCACCTTGTTGGGGGAACTCGTCCTGGCTTCGTTTAAGAGCTAAGCTGTAGGAAAGGGATCACCGTTC
TM1	A1	Targeting	AMN_-_103394826.23-P2	TGCAAGTGTACAAATCCAGCCCACCTTGTTGGGATTCGGCGTCTCAGACGTGTTTAAGAGCTAAGCTGTAGGAAAGGGATCACCGTTC
TM1	A1	Targeting	AMN_-_103394844.23-P2	TGCAAGTGTACAAATCCAGCCCACCTTGTTGGTGGGCTCGCACCTGGACTGGTTTAAGAGCTAAGCTGTAGGAAAGGGATCACCGTTC
TM1	A1	Targeting	AMN_-_103394850.23-P2	TGCAAGTGTACAAATCCAGCCCACCTTGTTGGCGCACCTGGACTGTGGCGCGTTTAAGAGCTAAGCTGTAGGAAAGGGATCACCGTTC
TM1	A1	Targeting	AMN_-_103394862.23-P2	TGCAAGTGTACAAATCCAGCCCACCTTGTTGGGTGGCGCGGGTGAGGCGGTGTTTAAGAGCTAAGCTGTAGGAAAGGGATCACCGTTC
TM1	A1	Targeting	AMN_-_103394868.23-P2	TGCAAGTGTACAAATCCAGCCCACCTTGTTGGCGGGTGAGGCGGTCGGGCAGTTTAAGAGCTAAGCTGTAGGAAAGGGATCACCGTTC
TM1	A1	Targeting	AMN_-_103394897.23-P2	TGCAAGTGTACAAATCCAGCCCACCTTGTTGGTCTGGAAAGGCATGTTCAGGTTTAAGAGCTAAGCTGTAGGAAAGGGATCACCGTTC
TM1	A1	Targeting	AMN_-_103394926.23-P2	TGCAAGTGTACAAATCCAGCCCACCTTGTTGGTGGAGGGAAGGCGCGTCGAGTTTAAGAGCTAAGCTGTAGGAAAGGGATCACCGTTC
TM1	A1	Targeting	ANTXR1_+_69240109.23-P1P2	TGCAAGTGTACAAATCCAGCCCACCTTGTTGGGGGACCCGCGGGAGTGCGTGTTTAAGAGCTAAGCTGTAGGAAAGGGATCACCGTTC
TM1	A1	Targeting	ANTXR1_+_69240120.23-P1P2	TGCAAGTGTACAAATCCAGCCCACCTTGTTGGAAAGCACGCGTGGGACCCGGTTTAAGAGCTAAGCTGTAGGAAAGGGATCACCGTTC
TM1	A1	Targeting	ANTXR1_+_69240128.23-P1P2	TGCAAGTGTACAAATCCAGCCCACCTTGTTGGAGGCGGCGAAAGCACGCGTGTTTAAGAGCTAAGCTGTAGGAAAGGGATCACCGTTC
TM1	A1	Targeting	ANTXR1_+_69240144.23-P1P2	TGCAAGTGTACAAATCCAGCCCACCTTGTTGGGCCACCTTGTGGACAAAGGGTTTAAGAGCTAAGCTGTAGGAAAGGGATCACCGTTC
TM1	A1	Targeting	ANTXR1_+_69240185.23-P1P2	TGCAAGTGTACAAATCCAGCCCACCTTGTTGGCCCCCCTTTCGCGTTCTTAGTTTAAGAGCTAAGCTGTAGGAAAGGGATCACCGTTC
TM1	A1	Targeting	ANTXR1_-_69239887.23-P1P2	TGCAAGTGTACAAATCCAGCCCACCTTGTTGGGAGCCGGAGTCACCGTGGTGTTTAAGAGCTAAGCTGTAGGAAAGGGATCACCGTTC
TM1	A1	Targeting	ANTXR1_-_69239947.23-P1P2	TGCAAGTGTACAAATCCAGCCCACCTTGTTGGAAAAGATGCAGGATAGGGAGTTTAAGAGCTAAGCTGTAGGAAAGGGATCACCGTTC
TM1	A1	Targeting	ANTXR1_-_69240126.23-P1P2	TGCAAGTGTACAAATCCAGCCCACCTTGTTGGGCCCCCGACGCACTCCCGCGTTTAAGAGCTAAGCTGTAGGAAAGGGATCACCGTTC
TM1	A1	Targeting	ANTXR1_-_69240203.23-P1P2	TGCAAGTGTACAAATCCAGCCCACCTTGTTGGTCCCCGTAAGAACGCGAAAGTTTAAGAGCTAAGCTGTAGGAAAGGGATCACCGTTC
TM1	A1	Targeting	ANTXR1_-_69240449.23-P1P2	TGCAAGTGTACAAATCCAGCCCACCTTGTTGGCGAAACCCAGAAACAGCATGTTTAAGAGCTAAGCTGTAGGAAAGGGATCACCGTTC
TM1	A1	Targeting	ANTXR2_+_80994336.23-P1P2	TGCAAGTGTACAAATCCAGCCCACCTTGTTGGCGGGCTCCTGCCCTCGGCGGTTTAAGAGCTAAGCTGTAGGAAAGGGATCACCGTTC
TM1	A1	Targeting	ANTXR2_+_80994355.23-P1P2	TGCAAGTGTACAAATCCAGCCCACCTTGTTGGAGCCCAGACCCGGCCCGAGGTTTAAGAGCTAAGCTGTAGGAAAGGGATCACCGTTC
TM1	A1	Targeting	ANTXR2_+_80994456.23-P1P2	TGCAAGTGTACAAATCCAGCCCACCTTGTTGGTAGTCATCTTCAACTCGGCGTTTAAGAGCTAAGCTGTAGGAAAGGGATCACCGTTC
TM1	A1	Targeting	ANTXR2_+_80994633.23-P1P2	TGCAAGTGTACAAATCCAGCCCACCTTGTTGGAGGAGGCCGTCACCTCCCAGTTTAAGAGCTAAGCTGTAGGAAAGGGATCACCGTTC
TM1	A1	Targeting	ANTXR2_-_80994293.23-P1P2	TGCAAGTGTACAAATCCAGCCCACCTTGTTGGCTGACAGGCCGTCCCCTTTGTTTAAGAGCTAAGCTGTAGGAAAGGGATCACCGTTC
TM1	A1	Targeting	ANTXR2_-_80994328.23-P1P2	TGCAAGTGTACAAATCCAGCCCACCTTGTTGGTGGCCCTGGGACTCCCGGCGTTTAAGAGCTAAGCTGTAGGAAAGGGATCACCGTTC
TM1	A1	Targeting	ANTXR2_-_80994346.23-P1P2	TGCAAGTGTACAAATCCAGCCCACCTTGTTGGCTGGAGAGAAGCCACGCCGGTTTAAGAGCTAAGCTGTAGGAAAGGGATCACCGTTC
TM1	A1	Targeting	ANTXR2_-_80994407.23-P1P2	TGCAAGTGTACAAATCCAGCCCACCTTGTTGGAGTGTGCGCCTGGGGACGAGTTTAAGAGCTAAGCTGTAGGAAAGGGATCACCGTTC
TM1	A1	Targeting	ANTXR2_-_80994501.23-P1P2	TGCAAGTGTACAAATCCAGCCCACCTTGTTGGGCTTGCCAGATTTGGGAAAGTTTAAGAGCTAAGCTGTAGGAAAGGGATCACCGTTC
TM1	A1	Targeting	ANTXR2_-_80994639.23-P1P2	TGCAAGTGTACAAATCCAGCCCACCTTGTTGGCCAAGACTAAGGATTCCATGTTTAAGAGCTAAGCTGTAGGAAAGGGATCACCGTTC
TM1	A1	Targeting	AP5S1_+_3800869.23-P1P2	TGCAAGTGTACAAATCCAGCCCACCTTGTTGGAGCGCGGAGTCTGCGGAAAGTTTAAGAGCTAAGCTGTAGGAAAGGGATCACCGTTC
TM1	A1	Targeting	AP5S1_+_3800915.23-P1P2	TGCAAGTGTACAAATCCAGCCCACCTTGTTGGCCCAGGCTGCCGACCCCGGGTTTAAGAGCTAAGCTGTAGGAAAGGGATCACCGTTC
TM1	A1	Targeting	AP5S1_+_3801003.23-P1P2	TGCAAGTGTACAAATCCAGCCCACCTTGTTGGCGGCCCCGAGCTGCCGGCAGTTTAAGAGCTAAGCTGTAGGAAAGGGATCACCGTTC
TM1	A1	Targeting	AP5S1_+_3801159.23-P1P2	TGCAAGTGTACAAATCCAGCCCACCTTGTTGGCGCCTGCGCACGTCGGTCGGTTTAAGAGCTAAGCTGTAGGAAAGGGATCACCGTTC
TM1	A1	Targeting	AP5S1_+_3801197.23-P1P2	TGCAAGTGTACAAATCCAGCCCACCTTGTTGGCGTGGCAGGAGAGCAATGGGTTTAAGAGCTAAGCTGTAGGAAAGGGATCACCGTTC
TM1	A1	Targeting	AP5S1_+_3801363.23-P1P2	TGCAAGTGTACAAATCCAGCCCACCTTGTTGGGAGGCGCAAGGCACTTCGGGTTTAAGAGCTAAGCTGTAGGAAAGGGATCACCGTTC
TM1	A1	Targeting	AP5S1_-_3800862.23-P1P2	TGCAAGTGTACAAATCCAGCCCACCTTGTTGGCCGCCCTCCGGGGACAACTGTTTAAGAGCTAAGCTGTAGGAAAGGGATCACCGTTC
TM1	A1	Targeting	AP5S1_-_3800953.23-P1P2	TGCAAGTGTACAAATCCAGCCCACCTTGTTGGCTGGGGCTCCGCTGATCTAGTTTAAGAGCTAAGCTGTAGGAAAGGGATCACCGTTC
TM1	A1	Targeting	AP5S1_-_3800966.23-P1P2	TGCAAGTGTACAAATCCAGCCCACCTTGTTGGGATCTAGGGCAACGAGCGGGTTTAAGAGCTAAGCTGTAGGAAAGGGATCACCGTTC
TM1	A1	Targeting	AP5S1_-_3801316.23-P1P2	TGCAAGTGTACAAATCCAGCCCACCTTGTTGGTGCAGGGGCAACACATTCAGTTTAAGAGCTAAGCTGTAGGAAAGGGATCACCGTTC
TM1	A1	Targeting	APCDD1L_+_57090476.23-P1P2	TGCAAGTGTACAAATCCAGCCCACCTTGTTGGAGGAGGAGTTGCGAGAAGGGTTTAAGAGCTAAGCTGTAGGAAAGGGATCACCGTTC
TM1	A1	Targeting	APCDD1L_+_57090479.23-P1P2	TGCAAGTGTACAAATCCAGCCCACCTTGTTGGAGGAGGAGGAGTTGCGAGAGTTTAAGAGCTAAGCTGTAGGAAAGGGATCACCGTTC
TM1	A1	Targeting	APCDD1L_+_57090595.23-P1P2	TGCAAGTGTACAAATCCAGCCCACCTTGTTGGGGGCTGGAGCGCACCCTTTGTTTAAGAGCTAAGCTGTAGGAAAGGGATCACCGTTC
TM1	A1	Targeting	APCDD1L_-_57090577.23-P1P2	TGCAAGTGTACAAATCCAGCCCACCTTGTTGGAAGCGAGGCAGCCGTGAGGGTTTAAGAGCTAAGCTGTAGGAAAGGGATCACCGTTC
TM1	A1	Targeting	APCDD1L_-_57090580.23-P1P2	TGCAAGTGTACAAATCCAGCCCACCTTGTTGGCGAGGCAGCCGTGAGGCGGGTTTAAGAGCTAAGCTGTAGGAAAGGGATCACCGTTC
TM1	A1	Targeting	APCDD1L_-_57090585.23-P1P2	TGCAAGTGTACAAATCCAGCCCACCTTGTTGGCAGCCGTGAGGCGGAGGACGTTTAAGAGCTAAGCTGTAGGAAAGGGATCACCGTTC
TM1	A1	Targeting	APCDD1L_-_57090590.23-P1P2	TGCAAGTGTACAAATCCAGCCCACCTTGTTGGGTGAGGCGGAGGACAGGCTGTTTAAGAGCTAAGCTGTAGGAAAGGGATCACCGTTC
TM1	A1	Targeting	APCDD1L_-_57090602.23-P1P2	TGCAAGTGTACAAATCCAGCCCACCTTGTTGGACAGGCTGGGGGATCCCAAGTTTAAGAGCTAAGCTGTAGGAAAGGGATCACCGTTC
TM1	A1	Targeting	APCDD1L_-_57090655.23-P1P2	TGCAAGTGTACAAATCCAGCCCACCTTGTTGGACTCTGGTGGCACCCTGGGGTTTAAGAGCTAAGCTGTAGGAAAGGGATCACCGTTC
TM1	A1	Targeting	APCDD1L_-_57090808.23-P1P2	TGCAAGTGTACAAATCCAGCCCACCTTGTTGGGATCACCGGGTAACTGCAGGTTTAAGAGCTAAGCTGTAGGAAAGGGATCACCGTTC
TM1	A1	Targeting	APCDD1_+_10454111.23-P1P2	TGCAAGTGTACAAATCCAGCCCACCTTGTTGGGCGTGGGATCCAAGCAAAGGTTTAAGAGCTAAGCTGTAGGAAAGGGATCACCGTTC
TM1	A1	Targeting	APCDD1_+_10454483.23-P1P2	TGCAAGTGTACAAATCCAGCCCACCTTGTTGGGAGACTTGAAAGGGCGCGTGTTTAAGAGCTAAGCTGTAGGAAAGGGATCACCGTTC
TM1	A1	Targeting	APCDD1_+_10454491.23-P1P2	TGCAAGTGTACAAATCCAGCCCACCTTGTTGGGGAGCGCGGAGACTTGAAAGTTTAAGAGCTAAGCTGTAGGAAAGGGATCACCGTTC
TM1	A1	Targeting	APCDD1_+_10454504.23-P1P2	TGCAAGTGTACAAATCCAGCCCACCTTGTTGGCCGCCGCCGGGGGGGAGCGGTTTAAGAGCTAAGCTGTAGGAAAGGGATCACCGTTC
TM1	A1	Targeting	APCDD1_+_10454529.23-P1P2	TGCAAGTGTACAAATCCAGCCCACCTTGTTGGACGCCGAGCCACCGCCCCCGTTTAAGAGCTAAGCTGTAGGAAAGGGATCACCGTTC
TM1	A1	Targeting	APCDD1_+_10454580.23-P1P2	TGCAAGTGTACAAATCCAGCCCACCTTGTTGGCCTGGCCGCGGCACGGAGGGTTTAAGAGCTAAGCTGTAGGAAAGGGATCACCGTTC
TM1	A1	Targeting	APCDD1_+_10454583.23-P1P2	TGCAAGTGTACAAATCCAGCCCACCTTGTTGGCAGCCTGGCCGCGGCACGGGTTTAAGAGCTAAGCTGTAGGAAAGGGATCACCGTTC
TM1	A1	Targeting	APCDD1_-_10454291.23-P1P2	TGCAAGTGTACAAATCCAGCCCACCTTGTTGGAGGAAGCGCGCCCGGAATGGTTTAAGAGCTAAGCTGTAGGAAAGGGATCACCGTTC
TM1	A1	Targeting	APCDD1_-_10454298.23-P1P2	TGCAAGTGTACAAATCCAGCCCACCTTGTTGGGCGCCCGGAATGGGGGACGGTTTAAGAGCTAAGCTGTAGGAAAGGGATCACCGTTC
TM1	A1	Targeting	APCDD1_-_10454522.23-P1P2	TGCAAGTGTACAAATCCAGCCCACCTTGTTGGTCTCCGCGCTCCCCCCCGGGTTTAAGAGCTAAGCTGTAGGAAAGGGATCACCGTTC
TM1	A1	Targeting	APLP1_+_36359242.23-P1P2	TGCAAGTGTACAAATCCAGCCCACCTTGTTGGCCAGCCAGGAGTCCGGCTAGTTTAAGAGCTAAGCTGTAGGAAAGGGATCACCGTTC
TM1	A1	Targeting	APLP1_+_36359359.23-P1P2	TGCAAGTGTACAAATCCAGCCCACCTTGTTGGGGTCAGGACAATAGCGTGGGTTTAAGAGCTAAGCTGTAGGAAAGGGATCACCGTTC
TM1	A1	Targeting	APLP1_+_36359374.23-P1P2	TGCAAGTGTACAAATCCAGCCCACCTTGTTGGCGGCCCCGCCTTCCTGGTCGTTTAAGAGCTAAGCTGTAGGAAAGGGATCACCGTTC
TM1	A1	Targeting	APLP1_-_36359197.23-P1P2	TGCAAGTGTACAAATCCAGCCCACCTTGTTGGTGAGTGTCTGGGTCTAAAGGTTTAAGAGCTAAGCTGTAGGAAAGGGATCACCGTTC
TM1	A1	Targeting	APLP1_-_36359251.23-P1P2	TGCAAGTGTACAAATCCAGCCCACCTTGTTGGAACGGGCGGAGCCCATAGCGTTTAAGAGCTAAGCTGTAGGAAAGGGATCACCGTTC
TM1	A1	Targeting	APLP1_-_36359275.23-P1P2	TGCAAGTGTACAAATCCAGCCCACCTTGTTGGTCCTGGCTGGGCCCTTCATGTTTAAGAGCTAAGCTGTAGGAAAGGGATCACCGTTC
TM1	A1	Targeting	APLP1_-_36359299.23-P1P2	TGCAAGTGTACAAATCCAGCCCACCTTGTTGGGGGACGCCTGGAATCTCGAGTTTAAGAGCTAAGCTGTAGGAAAGGGATCACCGTTC
TM1	A1	Targeting	APLP1_-_36359303.23-P1P2	TGCAAGTGTACAAATCCAGCCCACCTTGTTGGCGCCTGGAATCTCGAGGGGGTTTAAGAGCTAAGCTGTAGGAAAGGGATCACCGTTC
TM1	A1	Targeting	APLP1_-_36359306.23-P1P2	TGCAAGTGTACAAATCCAGCCCACCTTGTTGGCTGGAATCTCGAGGGGCGGGTTTAAGAGCTAAGCTGTAGGAAAGGGATCACCGTTC
TM1	A1	Targeting	APLP1_-_36359489.23-P1P2	TGCAAGTGTACAAATCCAGCCCACCTTGTTGGGGAGCTCCTGTCACCGCTGGTTTAAGAGCTAAGCTGTAGGAAAGGGATCACCGTTC
TM1	A1	Targeting	APLP2_+_129939493.23-P1P2	TGCAAGTGTACAAATCCAGCCCACCTTGTTGGTCTGGGGCCGCAACCCTGTGTTTAAGAGCTAAGCTGTAGGAAAGGGATCACCGTTC
TM1	A1	Targeting	APLP2_+_129939555.23-P1P2	TGCAAGTGTACAAATCCAGCCCACCTTGTTGGGATGGCCCCGCCCCCGCTCGTTTAAGAGCTAAGCTGTAGGAAAGGGATCACCGTTC
TM1	A1	Targeting	APLP2_+_129939647.23-P1P2	TGCAAGTGTACAAATCCAGCCCACCTTGTTGGTTGCGGTCCAGACCCAATCGTTTAAGAGCTAAGCTGTAGGAAAGGGATCACCGTTC
TM1	A1	Targeting	APLP2_+_129939711.23-P1P2	TGCAAGTGTACAAATCCAGCCCACCTTGTTGGTTACCACGCCCTCCTTCTGGTTTAAGAGCTAAGCTGTAGGAAAGGGATCACCGTTC
TM1	A1	Targeting	APLP2_-_129939566.23-P1P2	TGCAAGTGTACAAATCCAGCCCACCTTGTTGGGCCACAGGGTCCGGAGCGGGTTTAAGAGCTAAGCTGTAGGAAAGGGATCACCGTTC
TM1	A1	Targeting	APLP2_-_129939621.23-P1P2	TGCAAGTGTACAAATCCAGCCCACCTTGTTGGGGGGGGCGCGCGGTTGGACGTTTAAGAGCTAAGCTGTAGGAAAGGGATCACCGTTC
TM1	A1	Targeting	APLP2_-_129939625.23-P1P2	TGCAAGTGTACAAATCCAGCCCACCTTGTTGGGGCGCGCGGTTGGACCGGGGTTTAAGAGCTAAGCTGTAGGAAAGGGATCACCGTTC
TM1	A1	Targeting	APLP2_-_129939676.23-P1P2	TGCAAGTGTACAAATCCAGCCCACCTTGTTGGGGTCTGGACCGCAAGGGGGGTTTAAGAGCTAAGCTGTAGGAAAGGGATCACCGTTC
TM1	A1	Targeting	APLP2_-_129939724.23-P1P2	TGCAAGTGTACAAATCCAGCCCACCTTGTTGGATTGGGAGCCGCAGAAGGAGTTTAAGAGCTAAGCTGTAGGAAAGGGATCACCGTTC
TM1	A1	Targeting	APLP2_-_129939772.23-P1P2	TGCAAGTGTACAAATCCAGCCCACCTTGTTGGTGGTGTAAAACCCCCGGGGGTTTAAGAGCTAAGCTGTAGGAAAGGGATCACCGTTC
TM1	A1	Targeting	APMAP_+_24973425.23-P1P2	TGCAAGTGTACAAATCCAGCCCACCTTGTTGGAACGCTGCGGAATGGTCCCGTTTAAGAGCTAAGCTGTAGGAAAGGGATCACCGTTC
TM1	A1	Targeting	APMAP_+_24973432.23-P1P2	TGCAAGTGTACAAATCCAGCCCACCTTGTTGGCGGGGAGAACGCTGCGGAAGTTTAAGAGCTAAGCTGTAGGAAAGGGATCACCGTTC
TM1	A1	Targeting	APMAP_+_24973437.23-P1P2	TGCAAGTGTACAAATCCAGCCCACCTTGTTGGAGGGGCGGGGAGAACGCTGGTTTAAGAGCTAAGCTGTAGGAAAGGGATCACCGTTC
TM1	A1	Targeting	APMAP_+_24973454.23-P1P2	TGCAAGTGTACAAATCCAGCCCACCTTGTTGGCCGCCCATGAGGCCGGAAGGTTTAAGAGCTAAGCTGTAGGAAAGGGATCACCGTTC
TM1	A1	Targeting	APMAP_+_24973460.23-P1P2	TGCAAGTGTACAAATCCAGCCCACCTTGTTGGGACCTCCCGCCCATGAGGCGTTTAAGAGCTAAGCTGTAGGAAAGGGATCACCGTTC
TM1	A1	Targeting	APMAP_+_24973483.23-P1P2	TGCAAGTGTACAAATCCAGCCCACCTTGTTGGGCGCCGAGCAACGACGCGCGTTTAAGAGCTAAGCTGTAGGAAAGGGATCACCGTTC
TM1	A1	Targeting	APMAP_-_24973472.23-P1P2	TGCAAGTGTACAAATCCAGCCCACCTTGTTGGCCGCCCCTTCCGGCCTCATGTTTAAGAGCTAAGCTGTAGGAAAGGGATCACCGTTC
TM1	A1	Targeting	APMAP_-_24973486.23-P1P2	TGCAAGTGTACAAATCCAGCCCACCTTGTTGGCTCATGGGCGGGAGGTCCCGTTTAAGAGCTAAGCTGTAGGAAAGGGATCACCGTTC
TM1	A1	Targeting	APMAP_-_24973501.23-P1P2	TGCAAGTGTACAAATCCAGCCCACCTTGTTGGTCCCCGGCGCGTCGTTGCTGTTTAAGAGCTAAGCTGTAGGAAAGGGATCACCGTTC
TM1	A1	Targeting	APMAP_-_24973577.23-P1P2	TGCAAGTGTACAAATCCAGCCCACCTTGTTGGATAGCACCGGGAGCTGCCGGTTTAAGAGCTAAGCTGTAGGAAAGGGATCACCGTTC
TM1	A1	Targeting	APOL4_+_36597964.23-P1P2	TGCAAGTGTACAAATCCAGCCCACCTTGTTGGGCACAATTGGGCAGGGCTTGTTTAAGAGCTAAGCTGTAGGAAAGGGATCACCGTTC
TM1	A1	Targeting	APOL4_+_36597970.23-P1P2	TGCAAGTGTACAAATCCAGCCCACCTTGTTGGTGGGCTGCACAATTGGGCAGTTTAAGAGCTAAGCTGTAGGAAAGGGATCACCGTTC
TM1	A1	Targeting	APOL4_+_36598037.23-P1P2	TGCAAGTGTACAAATCCAGCCCACCTTGTTGGAATCTTTGTCGTCTGCATCGTTTAAGAGCTAAGCTGTAGGAAAGGGATCACCGTTC
TM1	A1	Targeting	APOL4_+_36598075.23-P1P2	TGCAAGTGTACAAATCCAGCCCACCTTGTTGGAGGCCCCGCAGCGACATGGGTTTAAGAGCTAAGCTGTAGGAAAGGGATCACCGTTC
TM1	A1	Targeting	APOL4_+_36598100.23-P1P2	TGCAAGTGTACAAATCCAGCCCACCTTGTTGGACCCCTCTTTTCCTGCCCAGTTTAAGAGCTAAGCTGTAGGAAAGGGATCACCGTTC
TM1	A1	Targeting	APOL4_-_36597907.23-P1P2	TGCAAGTGTACAAATCCAGCCCACCTTGTTGGTCTAGGCGAGTCTACCAGTGTTTAAGAGCTAAGCTGTAGGAAAGGGATCACCGTTC
TM1	A1	Targeting	APOL4_-_36597998.23-P1P2	TGCAAGTGTACAAATCCAGCCCACCTTGTTGGCAATTGTGCAGCCCAGACAGTTTAAGAGCTAAGCTGTAGGAAAGGGATCACCGTTC
TM1	A1	Targeting	APOL4_-_36598093.23-P1P2	TGCAAGTGTACAAATCCAGCCCACCTTGTTGGCTCCCTCCATGTCGCTGCGGTTTAAGAGCTAAGCTGTAGGAAAGGGATCACCGTTC
TM1	A1	Targeting	APOL4_-_36598246.23-P1P2	TGCAAGTGTACAAATCCAGCCCACCTTGTTGGCATTGCTGCCTAGATCTGCGTTTAAGAGCTAAGCTGTAGGAAAGGGATCACCGTTC
TM1	A1	Targeting	APOL4_-_36598464.23-P1P2	TGCAAGTGTACAAATCCAGCCCACCTTGTTGGTAGTGCTTTCTATCTTGATGTTTAAGAGCTAAGCTGTAGGAAAGGGATCACCGTTC
TM1	A1	Targeting	APP_+_27543156.23-P1P2	TGCAAGTGTACAAATCCAGCCCACCTTGTTGGGCCGCTAGGGGTCTCTCTCGTTTAAGAGCTAAGCTGTAGGAAAGGGATCACCGTTC
TM1	A1	Targeting	APP_+_27543168.23-P1P2	TGCAAGTGTACAAATCCAGCCCACCTTGTTGGTTCCCCGGCGGCGCCGCTAGTTTAAGAGCTAAGCTGTAGGAAAGGGATCACCGTTC
TM1	A1	Targeting	APP_+_27543215.23-P1P2	TGCAAGTGTACAAATCCAGCCCACCTTGTTGGCTGTGGGCGCGGGGCGCGAGTTTAAGAGCTAAGCTGTAGGAAAGGGATCACCGTTC
TM1	A1	Targeting	APP_+_27543230.23-P1P2	TGCAAGTGTACAAATCCAGCCCACCTTGTTGGCAAGGGCGCGTGCACCTGTGTTTAAGAGCTAAGCTGTAGGAAAGGGATCACCGTTC
TM1	A1	Targeting	APP_+_27543246.23-P1P2	TGCAAGTGTACAAATCCAGCCCACCTTGTTGGGGGGTGCAGGCGGCGCCAAGTTTAAGAGCTAAGCTGTAGGAAAGGGATCACCGTTC
TM1	A1	Targeting	APP_+_27543279.23-P1P2	TGCAAGTGTACAAATCCAGCCCACCTTGTTGGTGGGCCGTCGGCCGGGGAGGTTTAAGAGCTAAGCTGTAGGAAAGGGATCACCGTTC
TM1	A1	Targeting	APP_+_27543413.23-P1P2	TGCAAGTGTACAAATCCAGCCCACCTTGTTGGCAAGCTCACGGGGACGAGCGTTTAAGAGCTAAGCTGTAGGAAAGGGATCACCGTTC
TM1	A1	Targeting	APP_-_27543306.23-P1P2	TGCAAGTGTACAAATCCAGCCCACCTTGTTGGCCCGGCCGACGGCCCACCTGTTTAAGAGCTAAGCTGTAGGAAAGGGATCACCGTTC
TM1	A1	Targeting	APP_-_27543326.23-P1P2	TGCAAGTGTACAAATCCAGCCCACCTTGTTGGGGCTTCGTGAACAGTGGGAGTTTAAGAGCTAAGCTGTAGGAAAGGGATCACCGTTC
TM1	A1	Targeting	APP_-_27543365.23-P1P2	TGCAAGTGTACAAATCCAGCCCACCTTGTTGGGAGGGACGGTGCAGGATCAGTTTAAGAGCTAAGCTGTAGGAAAGGGATCACCGTTC
TM1	A1	Targeting	AREG_+_75310772.23-P1P2	TGCAAGTGTACAAATCCAGCCCACCTTGTTGGGACGTCAAGGCCCGGCCGTGTTTAAGAGCTAAGCTGTAGGAAAGGGATCACCGTTC
TM1	A1	Targeting	AREG_+_75310821.23-P1P2	TGCAAGTGTACAAATCCAGCCCACCTTGTTGGCGCGCACCTGCCGCTTTATGTTTAAGAGCTAAGCTGTAGGAAAGGGATCACCGTTC
TM1	A1	Targeting	AREG_+_75310843.23-P1P2	TGCAAGTGTACAAATCCAGCCCACCTTGTTGGTGTGCGAACGTCTGTAGGGGTTTAAGAGCTAAGCTGTAGGAAAGGGATCACCGTTC
TM1	A1	Targeting	AREG_+_75310880.23-P1P2	TGCAAGTGTACAAATCCAGCCCACCTTGTTGGGGGCTGTCCCGGGACCTCTGTTTAAGAGCTAAGCTGTAGGAAAGGGATCACCGTTC
TM1	A1	Targeting	AREG_+_75310889.23-P1P2	TGCAAGTGTACAAATCCAGCCCACCTTGTTGGCGGCGCCTCGGGCTGTCCCGTTTAAGAGCTAAGCTGTAGGAAAGGGATCACCGTTC
TM1	A1	Targeting	AREG_+_75310917.23-P1P2	TGCAAGTGTACAAATCCAGCCCACCTTGTTGGAGGCTTGGGGAGCTCGGGGGTTTAAGAGCTAAGCTGTAGGAAAGGGATCACCGTTC
TM1	A1	Targeting	AREG_+_75310936.23-P1P2	TGCAAGTGTACAAATCCAGCCCACCTTGTTGGGAGTGTGCGCCGCTCTCGAGTTTAAGAGCTAAGCTGTAGGAAAGGGATCACCGTTC
TM1	A1	Targeting	AREG_+_75310958.23-P1P2	TGCAAGTGTACAAATCCAGCCCACCTTGTTGGTGGAAGAGCGAGTGGAGACGTTTAAGAGCTAAGCTGTAGGAAAGGGATCACCGTTC
TM1	A1	Targeting	AREG_-_75310798.23-P1P2	TGCAAGTGTACAAATCCAGCCCACCTTGTTGGGGCCGGGCCTTGACGTCATGTTTAAGAGCTAAGCTGTAGGAAAGGGATCACCGTTC
TM1	A1	Targeting	AREG_-_75310948.23-P1P2	TGCAAGTGTACAAATCCAGCCCACCTTGTTGGCTCCCCAAGCCTTCGAGAGGTTTAAGAGCTAAGCTGTAGGAAAGGGATCACCGTTC
TM1	A1	Targeting	AREL1_+_75179803.23-P1P2	TGCAAGTGTACAAATCCAGCCCACCTTGTTGGGCAAAGGATAGCCCGGAAGGTTTAAGAGCTAAGCTGTAGGAAAGGGATCACCGTTC
TM1	A1	Targeting	AREL1_+_75179898.23-P1P2	TGCAAGTGTACAAATCCAGCCCACCTTGTTGGGGACCGTCTTCTCTCACCAGTTTAAGAGCTAAGCTGTAGGAAAGGGATCACCGTTC
TM1	A1	Targeting	AREL1_+_75179918.23-P1P2	TGCAAGTGTACAAATCCAGCCCACCTTGTTGGGCCTGATAACGTCCCTTCTGTTTAAGAGCTAAGCTGTAGGAAAGGGATCACCGTTC
TM1	A1	Targeting	AREL1_-_75179892.23-P1P2	TGCAAGTGTACAAATCCAGCCCACCTTGTTGGTACGGAAGAACCAGGAGTTGTTTAAGAGCTAAGCTGTAGGAAAGGGATCACCGTTC
TM1	A1	Targeting	AREL1_-_75179903.23-P1P2	TGCAAGTGTACAAATCCAGCCCACCTTGTTGGCAGGAGTTTGGCGTGACCAGTTTAAGAGCTAAGCTGTAGGAAAGGGATCACCGTTC
TM1	A1	Targeting	AREL1_-_75179927.23-P1P2	TGCAAGTGTACAAATCCAGCCCACCTTGTTGGAGAGAAGACGGTCCAAGAAGTTTAAGAGCTAAGCTGTAGGAAAGGGATCACCGTTC
TM1	A1	Targeting	AREL1_-_75179938.23-P1P2	TGCAAGTGTACAAATCCAGCCCACCTTGTTGGTCCAAGAAGGGACGTTATCGTTTAAGAGCTAAGCTGTAGGAAAGGGATCACCGTTC
TM1	A1	Targeting	AREL1_-_75179950.23-P1P2	TGCAAGTGTACAAATCCAGCCCACCTTGTTGGCGTTATCAGGCCACTTTTTGTTTAAGAGCTAAGCTGTAGGAAAGGGATCACCGTTC
TM1	A1	Targeting	AREL1_-_75179953.23-P1P2	TGCAAGTGTACAAATCCAGCCCACCTTGTTGGTATCAGGCCACTTTTTGGGGTTTAAGAGCTAAGCTGTAGGAAAGGGATCACCGTTC
TM1	A1	Targeting	AREL1_-_75179976.23-P1P2	TGCAAGTGTACAAATCCAGCCCACCTTGTTGGGAAGGAGGTAGTCAGACCGGTTTAAGAGCTAAGCTGTAGGAAAGGGATCACCGTTC
TM1	A1	Targeting	ARL10_+_175792256.23-P1P2	TGCAAGTGTACAAATCCAGCCCACCTTGTTGGTCCACCAGGGGTTAGCTCAGTTTAAGAGCTAAGCTGTAGGAAAGGGATCACCGTTC
TM1	A1	Targeting	ARL10_+_175792293.23-P1P2	TGCAAGTGTACAAATCCAGCCCACCTTGTTGGGCCTGGGGAGGACGGGAGAGTTTAAGAGCTAAGCTGTAGGAAAGGGATCACCGTTC
TM1	A1	Targeting	ARL10_+_175792307.23-P1P2	TGCAAGTGTACAAATCCAGCCCACCTTGTTGGGAAGGAGAGGCTGTGCCTGGTTTAAGAGCTAAGCTGTAGGAAAGGGATCACCGTTC
TM1	A1	Targeting	ARL10_+_175792354.23-P1P2	TGCAAGTGTACAAATCCAGCCCACCTTGTTGGGCCGGCGCGCGGGGACCTCGTTTAAGAGCTAAGCTGTAGGAAAGGGATCACCGTTC
TM1	A1	Targeting	ARL10_-_175791995.23-P1P2	TGCAAGTGTACAAATCCAGCCCACCTTGTTGGAAAACCCCTGTGGTCCGGGGTTTAAGAGCTAAGCTGTAGGAAAGGGATCACCGTTC
TM1	A1	Targeting	ARL10_-_175792141.23-P1P2	TGCAAGTGTACAAATCCAGCCCACCTTGTTGGACCGGGAGACAGATCGCTTGTTTAAGAGCTAAGCTGTAGGAAAGGGATCACCGTTC
TM1	A1	Targeting	ARL10_-_175792273.23-P1P2	TGCAAGTGTACAAATCCAGCCCACCTTGTTGGAAAGCCGTGAGCTAACCCCGTTTAAGAGCTAAGCTGTAGGAAAGGGATCACCGTTC
TM1	A1	Targeting	ARL10_-_175792313.23-P1P2	TGCAAGTGTACAAATCCAGCCCACCTTGTTGGGCCGTCTCCCGTCCTCCCCGTTTAAGAGCTAAGCTGTAGGAAAGGGATCACCGTTC
TM1	A1	Targeting	ARL10_-_175792443.23-P1P2	TGCAAGTGTACAAATCCAGCCCACCTTGTTGGACAGCGGCAGTGCATTGTGGTTTAAGAGCTAAGCTGTAGGAAAGGGATCACCGTTC
TM1	A1	Targeting	ARL10_-_175792468.23-P1P2	TGCAAGTGTACAAATCCAGCCCACCTTGTTGGGTAGTGCGGGACTGGGTCTGTTTAAGAGCTAAGCTGTAGGAAAGGGATCACCGTTC
TM1	A1	Targeting	ARMC10_+_102715089.23-P1P2	TGCAAGTGTACAAATCCAGCCCACCTTGTTGGCGTCGGTGGGGAGTTAGAAGTTTAAGAGCTAAGCTGTAGGAAAGGGATCACCGTTC
TM1	A1	Targeting	ARMC10_+_102715422.23-P1P2	TGCAAGTGTACAAATCCAGCCCACCTTGTTGGGCGCCCCACGCGGAGACGCGTTTAAGAGCTAAGCTGTAGGAAAGGGATCACCGTTC
TM1	A1	Targeting	ARMC10_+_102715455.23-P1P2	TGCAAGTGTACAAATCCAGCCCACCTTGTTGGGCGCTGCACACCGGGAGGGGTTTAAGAGCTAAGCTGTAGGAAAGGGATCACCGTTC
TM1	A1	Targeting	ARMC10_+_102715459.23-P1P2	TGCAAGTGTACAAATCCAGCCCACCTTGTTGGCGGGGCGCTGCACACCGGGGTTTAAGAGCTAAGCTGTAGGAAAGGGATCACCGTTC
TM1	A1	Targeting	ARMC10_-_102715351.23-P1P2	TGCAAGTGTACAAATCCAGCCCACCTTGTTGGGCCCCGCGCTCCGCTGCCAGTTTAAGAGCTAAGCTGTAGGAAAGGGATCACCGTTC
TM1	A1	Targeting	ARMC10_-_102715387.23-P1P2	TGCAAGTGTACAAATCCAGCCCACCTTGTTGGTGGTTGCTTCACGCCCCGGGTTTAAGAGCTAAGCTGTAGGAAAGGGATCACCGTTC
TM1	A1	Targeting	ARMC10_-_102715412.23-P1P2	TGCAAGTGTACAAATCCAGCCCACCTTGTTGGAGACGGGAAGCTCGGCTCTGTTTAAGAGCTAAGCTGTAGGAAAGGGATCACCGTTC
TM1	A1	Targeting	ARMC10_-_102715439.23-P1P2	TGCAAGTGTACAAATCCAGCCCACCTTGTTGGGGCCCCGGCGTCTCCGCGTGTTTAAGAGCTAAGCTGTAGGAAAGGGATCACCGTTC
TM1	A1	Targeting	ARMC10_-_102715466.23-P1P2	TGCAAGTGTACAAATCCAGCCCACCTTGTTGGCCGTCCGACCCCCCCCTCCGTTTAAGAGCTAAGCTGTAGGAAAGGGATCACCGTTC
TM1	A1	Targeting	ARMC10_-_102715523.23-P1P2	TGCAAGTGTACAAATCCAGCCCACCTTGTTGGAGAAGCCGCCGGGACGCGCGTTTAAGAGCTAAGCTGTAGGAAAGGGATCACCGTTC
TM1	A1	Targeting	ARMCX1_+_100805496.23-P1P2	TGCAAGTGTACAAATCCAGCCCACCTTGTTGGTCGGCTCCAGCTCACGTGAGTTTAAGAGCTAAGCTGTAGGAAAGGGATCACCGTTC
TM1	A1	Targeting	ARMCX1_-_100805218.23-P1P2	TGCAAGTGTACAAATCCAGCCCACCTTGTTGGCATGACTTGTGATGGGGGGGTTTAAGAGCTAAGCTGTAGGAAAGGGATCACCGTTC
TM1	A1	Targeting	ARMCX1_-_100805243.23-P1P2	TGCAAGTGTACAAATCCAGCCCACCTTGTTGGAGAGAGAGACAGTTGGACTGTTTAAGAGCTAAGCTGTAGGAAAGGGATCACCGTTC
TM1	A1	Targeting	ARMCX1_-_100805375.23-P1P2	TGCAAGTGTACAAATCCAGCCCACCTTGTTGGAAGCTACTTCTAGTCTCCGGTTTAAGAGCTAAGCTGTAGGAAAGGGATCACCGTTC
TM1	A1	Targeting	ARMCX1_-_100805379.23-P1P2	TGCAAGTGTACAAATCCAGCCCACCTTGTTGGTACTTCTAGTCTCCGGGGTGTTTAAGAGCTAAGCTGTAGGAAAGGGATCACCGTTC
TM1	A1	Targeting	ARMCX1_-_100805387.23-P1P2	TGCAAGTGTACAAATCCAGCCCACCTTGTTGGGTCTCCGGGGTTGGCAAAGGTTTAAGAGCTAAGCTGTAGGAAAGGGATCACCGTTC
TM1	A1	Targeting	ARMCX1_-_100805417.23-P1P2	TGCAAGTGTACAAATCCAGCCCACCTTGTTGGTGACAGGACCTGATGTGTCGTTTAAGAGCTAAGCTGTAGGAAAGGGATCACCGTTC
TM1	A1	Targeting	ARMCX1_-_100805458.23-P1P2	TGCAAGTGTACAAATCCAGCCCACCTTGTTGGCTTCTGCGGCGCTGCTGATGTTTAAGAGCTAAGCTGTAGGAAAGGGATCACCGTTC
TM1	A1	Targeting	ARMCX1_-_100805472.23-P1P2	TGCAAGTGTACAAATCCAGCCCACCTTGTTGGCTGATGGGAGTGGTAATTGGTTTAAGAGCTAAGCTGTAGGAAAGGGATCACCGTTC
TM1	A1	Targeting	ARMCX1_-_100805486.23-P1P2	TGCAAGTGTACAAATCCAGCCCACCTTGTTGGAATTGGGGTCCTGATCTCAGTTTAAGAGCTAAGCTGTAGGAAAGGGATCACCGTTC
TM1	A1	Targeting	ARMCX2_+_100914690.23-P1P2	TGCAAGTGTACAAATCCAGCCCACCTTGTTGGCCCTGAATAGGGTAATCTAGTTTAAGAGCTAAGCTGTAGGAAAGGGATCACCGTTC
TM1	A1	Targeting	ARMCX2_+_100914871.23-P1P2	TGCAAGTGTACAAATCCAGCCCACCTTGTTGGCGTGACCAGGAGCTGACGTGTTTAAGAGCTAAGCTGTAGGAAAGGGATCACCGTTC
TM1	A1	Targeting	ARMCX2_+_100914937.23-P1P2	TGCAAGTGTACAAATCCAGCCCACCTTGTTGGAGGGGGCTCGTACTCTTGGGTTTAAGAGCTAAGCTGTAGGAAAGGGATCACCGTTC
TM1	A1	Targeting	ARMCX2_+_100914955.23-P1P2	TGCAAGTGTACAAATCCAGCCCACCTTGTTGGTGGGAATGGAAGTAAAGGAGTTTAAGAGCTAAGCTGTAGGAAAGGGATCACCGTTC
TM1	A1	Targeting	ARMCX2_+_100914983.23-P1P2	TGCAAGTGTACAAATCCAGCCCACCTTGTTGGTGACAGGACCTGATGTGGTGTTTAAGAGCTAAGCTGTAGGAAAGGGATCACCGTTC
TM1	A1	Targeting	ARMCX2_+_100915155.23-P1P2	TGCAAGTGTACAAATCCAGCCCACCTTGTTGGGTGTCCAGTAGCCCAGGAAGTTTAAGAGCTAAGCTGTAGGAAAGGGATCACCGTTC
TM1	A1	Targeting	ARMCX2_+_100915160.23-P1P2	TGCAAGTGTACAAATCCAGCCCACCTTGTTGGGAAGAGTGTCCAGTAGCCCGTTTAAGAGCTAAGCTGTAGGAAAGGGATCACCGTTC
TM1	A1	Targeting	ARMCX2_-_100914855.23-P1P2	TGCAAGTGTACAAATCCAGCCCACCTTGTTGGGGACGGAGAACGACGGTCAGTTTAAGAGCTAAGCTGTAGGAAAGGGATCACCGTTC
TM1	A1	Targeting	ARMCX2_-_100914920.23-P1P2	TGCAAGTGTACAAATCCAGCCCACCTTGTTGGCTGCATCGCCAGTAAGCTTGTTTAAGAGCTAAGCTGTAGGAAAGGGATCACCGTTC
TM1	A1	Targeting	ARMCX2_-_100915112.23-P1P2	TGCAAGTGTACAAATCCAGCCCACCTTGTTGGAGGGGCTGCATCTTCTCGGGTTTAAGAGCTAAGCTGTAGGAAAGGGATCACCGTTC
TM1	A1	Targeting	ARMCX3_+_100877922.23-P1P2	TGCAAGTGTACAAATCCAGCCCACCTTGTTGGAGGGACGGCATCTTCCCCTGTTTAAGAGCTAAGCTGTAGGAAAGGGATCACCGTTC
TM1	A1	Targeting	ARMCX3_+_100878049.23-P1P2	TGCAAGTGTACAAATCCAGCCCACCTTGTTGGACCAGCAGTGCGGCAGAAGGTTTAAGAGCTAAGCTGTAGGAAAGGGATCACCGTTC
TM1	A1	Targeting	ARMCX3_-_100877836.23-P1P2	TGCAAGTGTACAAATCCAGCCCACCTTGTTGGGTAGACTTTCATAGCTCGGGTTTAAGAGCTAAGCTGTAGGAAAGGGATCACCGTTC
TM1	A1	Targeting	ARMCX3_-_100877882.23-P1P2	TGCAAGTGTACAAATCCAGCCCACCTTGTTGGTGTCCCAGGAGCCTAGGGAGTTTAAGAGCTAAGCTGTAGGAAAGGGATCACCGTTC
TM1	A1	Targeting	ARMCX3_-_100877929.23-P1P2	TGCAAGTGTACAAATCCAGCCCACCTTGTTGGAAGTGGCCCATAGCCCCAGGTTTAAGAGCTAAGCTGTAGGAAAGGGATCACCGTTC
TM1	A1	Targeting	ARMCX3_-_100877956.23-P1P2	TGCAAGTGTACAAATCCAGCCCACCTTGTTGGGCCGTCCCTTTCTGGTAATGTTTAAGAGCTAAGCTGTAGGAAAGGGATCACCGTTC
TM1	A1	Targeting	ARMCX3_-_100877959.23-P1P2	TGCAAGTGTACAAATCCAGCCCACCTTGTTGGGTCCCTTTCTGGTAATCGGGTTTAAGAGCTAAGCTGTAGGAAAGGGATCACCGTTC
TM1	A1	Targeting	ARMCX3_-_100878026.23-P1P2	TGCAAGTGTACAAATCCAGCCCACCTTGTTGGAGTAATAAGGCCTGGTGTGGTTTAAGAGCTAAGCTGTAGGAAAGGGATCACCGTTC
TM1	A1	Targeting	ARMCX3_-_100878098.23-P1P2	TGCAAGTGTACAAATCCAGCCCACCTTGTTGGGGAAATTGGGGACCCGAGTGTTTAAGAGCTAAGCTGTAGGAAAGGGATCACCGTTC
TM1	A1	Targeting	ARMCX3_-_100878101.23-P1P2	TGCAAGTGTACAAATCCAGCCCACCTTGTTGGAATTGGGGACCCGAGTTGGGTTTAAGAGCTAAGCTGTAGGAAAGGGATCACCGTTC
TM1	A1	Targeting	ARMCX6_+_100872938.23-P1P2	TGCAAGTGTACAAATCCAGCCCACCTTGTTGGCCTGCTAGTCGCCTCCGTCGTTTAAGAGCTAAGCTGTAGGAAAGGGATCACCGTTC
TM1	A1	Targeting	ARMCX6_+_100873032.23-P1P2	TGCAAGTGTACAAATCCAGCCCACCTTGTTGGCGCCTGCCGCACTGCTTGTGTTTAAGAGCTAAGCTGTAGGAAAGGGATCACCGTTC
TM1	A1	Targeting	ARMCX6_+_100873058.23-P1P2	TGCAAGTGTACAAATCCAGCCCACCTTGTTGGTGAGGGGGAGATACAAGGCGTTTAAGAGCTAAGCTGTAGGAAAGGGATCACCGTTC
TM1	A1	Targeting	ARMCX6_+_100873083.23-P1P2	TGCAAGTGTACAAATCCAGCCCACCTTGTTGGAAGTGACAGGGCCCACTGTGTTTAAGAGCTAAGCTGTAGGAAAGGGATCACCGTTC
TM1	A1	Targeting	ARMCX6_+_100873220.23-P1P2	TGCAAGTGTACAAATCCAGCCCACCTTGTTGGGTAAATGAAGGGTAGACTCGTTTAAGAGCTAAGCTGTAGGAAAGGGATCACCGTTC
TM1	A1	Targeting	ARMCX6_+_100873231.23-P1P2	TGCAAGTGTACAAATCCAGCCCACCTTGTTGGCCCCAAGAAGTGTAAATGAGTTTAAGAGCTAAGCTGTAGGAAAGGGATCACCGTTC
TM1	A1	Targeting	ARMCX6_+_100873318.23-P1P2	TGCAAGTGTACAAATCCAGCCCACCTTGTTGGTTGGTGTAGAGACTGAACAGTTTAAGAGCTAAGCTGTAGGAAAGGGATCACCGTTC
TM1	A1	Targeting	ARMCX6_-_100873016.23-P1P2	TGCAAGTGTACAAATCCAGCCCACCTTGTTGGCCACGTCACCAGTGCGCTCGTTTAAGAGCTAAGCTGTAGGAAAGGGATCACCGTTC
TM1	A1	Targeting	ARMCX6_-_100873202.23-P1P2	TGCAAGTGTACAAATCCAGCCCACCTTGTTGGAGGAAGGGGCAGCATCTTTGTTTAAGAGCTAAGCTGTAGGAAAGGGATCACCGTTC
TM1	A1	Targeting	ARMCX6_-_100873206.23-P1P2	TGCAAGTGTACAAATCCAGCCCACCTTGTTGGAGGGGCAGCATCTTTAGGAGTTTAAGAGCTAAGCTGTAGGAAAGGGATCACCGTTC
TM1	A1	Targeting	ARSD_+_2847390.23-P1P2	TGCAAGTGTACAAATCCAGCCCACCTTGTTGGGATCCCGCAGCTGAGAGGGGTTTAAGAGCTAAGCTGTAGGAAAGGGATCACCGTTC
TM1	A1	Targeting	ARSD_+_2847393.23-P1P2	TGCAAGTGTACAAATCCAGCCCACCTTGTTGGCCAGATCCCGCAGCTGAGAGTTTAAGAGCTAAGCTGTAGGAAAGGGATCACCGTTC
TM1	A1	Targeting	ARSD_+_2847439.23-P1P2	TGCAAGTGTACAAATCCAGCCCACCTTGTTGGCGAGAGCCAGGAGATGACGGTTTAAGAGCTAAGCTGTAGGAAAGGGATCACCGTTC
TM1	A1	Targeting	ARSD_+_2847464.23-P1P2	TGCAAGTGTACAAATCCAGCCCACCTTGTTGGTTCCACGCGCAGGTCCCGGGTTTAAGAGCTAAGCTGTAGGAAAGGGATCACCGTTC
TM1	A1	Targeting	ARSD_+_2847495.23-P1P2	TGCAAGTGTACAAATCCAGCCCACCTTGTTGGCCTTCCCGTGTGACGACCTGTTTAAGAGCTAAGCTGTAGGAAAGGGATCACCGTTC
TM1	A1	Targeting	ARSD_+_2847540.23-P1P2	TGCAAGTGTACAAATCCAGCCCACCTTGTTGGCGCCCGGTCAATCGTAACTGTTTAAGAGCTAAGCTGTAGGAAAGGGATCACCGTTC
TM1	A1	Targeting	ARSD_-_2847490.23-P1P2	TGCAAGTGTACAAATCCAGCCCACCTTGTTGGGGGACCTGCGCGTGGAAACGTTTAAGAGCTAAGCTGTAGGAAAGGGATCACCGTTC
TM1	A1	Targeting	ARSD_-_2847500.23-P1P2	TGCAAGTGTACAAATCCAGCCCACCTTGTTGGCGTGGAAACAGGTTTTCCCGTTTAAGAGCTAAGCTGTAGGAAAGGGATCACCGTTC
TM1	A1	Targeting	ARSD_-_2847522.23-P1P2	TGCAAGTGTACAAATCCAGCCCACCTTGTTGGTCGTCACACGGGAAGGCCTGTTTAAGAGCTAAGCTGTAGGAAAGGGATCACCGTTC
TM1	A1	Targeting	ARSD_-_2847558.23-P1P2	TGCAAGTGTACAAATCCAGCCCACCTTGTTGGAAACCCAGTTACGATTGACGTTTAAGAGCTAAGCTGTAGGAAAGGGATCACCGTTC
TM1	A1	Targeting	ASGR2_+_7018215.23-P1P2	TGCAAGTGTACAAATCCAGCCCACCTTGTTGGCCAGGGGACCCCCCTCTCTGTTTAAGAGCTAAGCTGTAGGAAAGGGATCACCGTTC
TM1	A1	Targeting	ASGR2_+_7018250.23-P1P2	TGCAAGTGTACAAATCCAGCCCACCTTGTTGGGAGTGGGGTGAGTGGCGTGGTTTAAGAGCTAAGCTGTAGGAAAGGGATCACCGTTC
TM1	A1	Targeting	ASGR2_+_7018344.23-P1P2	TGCAAGTGTACAAATCCAGCCCACCTTGTTGGTCGGAGGCAGGAAGTGAGAGTTTAAGAGCTAAGCTGTAGGAAAGGGATCACCGTTC
TM1	A1	Targeting	ASGR2_+_7018398.23-P1P2	TGCAAGTGTACAAATCCAGCCCACCTTGTTGGGGTCGCTGTGATCCTGGTCGTTTAAGAGCTAAGCTGTAGGAAAGGGATCACCGTTC
TM1	A1	Targeting	ASGR2_+_7018623.23-P1P2	TGCAAGTGTACAAATCCAGCCCACCTTGTTGGGCAGGGTCTGGGCCGGACGGTTTAAGAGCTAAGCTGTAGGAAAGGGATCACCGTTC
TM1	A1	Targeting	ASGR2_-_7018036.23-P1P2	TGCAAGTGTACAAATCCAGCCCACCTTGTTGGTGGGGCAGGTGGAGCTCACGTTTAAGAGCTAAGCTGTAGGAAAGGGATCACCGTTC
TM1	A1	Targeting	ASGR2_-_7018083.23-P1P2	TGCAAGTGTACAAATCCAGCCCACCTTGTTGGGTCCGGGCAAGGCCTGCACGTTTAAGAGCTAAGCTGTAGGAAAGGGATCACCGTTC
TM1	A1	Targeting	ASGR2_-_7018135.23-P1P2	TGCAAGTGTACAAATCCAGCCCACCTTGTTGGACCTCCTGGCCTGGGACTTGTTTAAGAGCTAAGCTGTAGGAAAGGGATCACCGTTC
TM1	A1	Targeting	ASGR2_-_7018179.23-P1P2	TGCAAGTGTACAAATCCAGCCCACCTTGTTGGGAGCTGTAACTCATTTGTGGTTTAAGAGCTAAGCTGTAGGAAAGGGATCACCGTTC
TM1	A1	Targeting	ASGR2_-_7018525.23-P1P2	TGCAAGTGTACAAATCCAGCCCACCTTGTTGGCCAACTCGCTTCACTCTCCGTTTAAGAGCTAAGCTGTAGGAAAGGGATCACCGTTC
TM1	A1	Targeting	AVL9_+_32534875.23-P1P2	TGCAAGTGTACAAATCCAGCCCACCTTGTTGGTTACGTGACCCGGGCGGCTGTTTAAGAGCTAAGCTGTAGGAAAGGGATCACCGTTC
TM1	A1	Targeting	AVL9_+_32534880.23-P1P2	TGCAAGTGTACAAATCCAGCCCACCTTGTTGGGGGGCTTACGTGACCCGGGGTTTAAGAGCTAAGCTGTAGGAAAGGGATCACCGTTC
TM1	A1	Targeting	AVL9_+_32534908.23-P1P2	TGCAAGTGTACAAATCCAGCCCACCTTGTTGGGGTGGGACTTGACGAGGAGGTTTAAGAGCTAAGCTGTAGGAAAGGGATCACCGTTC
TM1	A1	Targeting	AVL9_+_32534968.23-P1P2	TGCAAGTGTACAAATCCAGCCCACCTTGTTGGAGAGATCGACTCTGTGGGGGTTTAAGAGCTAAGCTGTAGGAAAGGGATCACCGTTC
TM1	A1	Targeting	AVL9_+_32534971.23-P1P2	TGCAAGTGTACAAATCCAGCCCACCTTGTTGGAGGAGAGATCGACTCTGTGGTTTAAGAGCTAAGCTGTAGGAAAGGGATCACCGTTC
TM1	A1	Targeting	AVL9_+_32534990.23-P1P2	TGCAAGTGTACAAATCCAGCCCACCTTGTTGGAGCGGGGTGGGTCTAGGAGGTTTAAGAGCTAAGCTGTAGGAAAGGGATCACCGTTC
TM1	A1	Targeting	AVL9_+_32535046.23-P1P2	TGCAAGTGTACAAATCCAGCCCACCTTGTTGGAGGCCGGGAGGGCCCTGACGTTTAAGAGCTAAGCTGTAGGAAAGGGATCACCGTTC
TM1	A1	Targeting	AVL9_+_32535095.23-P1P2	TGCAAGTGTACAAATCCAGCCCACCTTGTTGGGGGCTGTCACCTGACACGGGTTTAAGAGCTAAGCTGTAGGAAAGGGATCACCGTTC
TM1	A1	Targeting	AVL9_-_32534855.23-P1P2	TGCAAGTGTACAAATCCAGCCCACCTTGTTGGGCCGCACCTCCAGGTCCCGGTTTAAGAGCTAAGCTGTAGGAAAGGGATCACCGTTC
TM1	A1	Targeting	AVL9_-_32535140.23-P1P2	TGCAAGTGTACAAATCCAGCCCACCTTGTTGGAAGCTGCGGAAGCGGATGAGTTTAAGAGCTAAGCTGTAGGAAAGGGATCACCGTTC
TM1	A1	Targeting	AXL_+_41724580.23-P1P2	TGCAAGTGTACAAATCCAGCCCACCTTGTTGGACGGGCAGGGGCATGCTACGTTTAAGAGCTAAGCTGTAGGAAAGGGATCACCGTTC
TM1	A1	Targeting	AXL_+_41724881.23-P1P2	TGCAAGTGTACAAATCCAGCCCACCTTGTTGGAGGCCGTGTCTCTCTATCCGTTTAAGAGCTAAGCTGTAGGAAAGGGATCACCGTTC
TM1	A1	Targeting	AXL_+_41724970.23-P1P2	TGCAAGTGTACAAATCCAGCCCACCTTGTTGGAGGATCAGCTCTTTCTTAAGTTTAAGAGCTAAGCTGTAGGAAAGGGATCACCGTTC
TM1	A1	Targeting	AXL_+_41724994.23-P1P2	TGCAAGTGTACAAATCCAGCCCACCTTGTTGGTCAGGGGTTAACTCAAGAGGTTTAAGAGCTAAGCTGTAGGAAAGGGATCACCGTTC
TM1	A1	Targeting	AXL_+_41725009.23-P1P2	TGCAAGTGTACAAATCCAGCCCACCTTGTTGGGGGCCACCTGGACAATCAGGTTTAAGAGCTAAGCTGTAGGAAAGGGATCACCGTTC
TM1	A1	Targeting	AXL_-_41724835.23-P1P2	TGCAAGTGTACAAATCCAGCCCACCTTGTTGGTGAGAGGGGAGTGGAGTTCGTTTAAGAGCTAAGCTGTAGGAAAGGGATCACCGTTC
TM1	A1	Targeting	AXL_-_41724899.23-P1P2	TGCAAGTGTACAAATCCAGCCCACCTTGTTGGGAGCCCGGATAGAGAGACAGTTTAAGAGCTAAGCTGTAGGAAAGGGATCACCGTTC
TM1	A1	Targeting	AXL_-_41724908.23-P1P2	TGCAAGTGTACAAATCCAGCCCACCTTGTTGGTAGAGAGACACGGCCTCACGTTTAAGAGCTAAGCTGTAGGAAAGGGATCACCGTTC
TM1	A1	Targeting	AXL_-_41725065.23-P1P2	TGCAAGTGTACAAATCCAGCCCACCTTGTTGGCTGGTGGGCGGAGGCAAAGGTTTAAGAGCTAAGCTGTAGGAAAGGGATCACCGTTC
TM1	A1	Targeting	AXL_-_41725086.23-P1P2	TGCAAGTGTACAAATCCAGCCCACCTTGTTGGGGAGCCAGGGGCGGAGAAAGTTTAAGAGCTAAGCTGTAGGAAAGGGATCACCGTTC
TM1	A1	Targeting	BAMBI_+_28966257.23-P1P2	TGCAAGTGTACAAATCCAGCCCACCTTGTTGGCGAGCGGCGCCGGCGTCTGGTTTAAGAGCTAAGCTGTAGGAAAGGGATCACCGTTC
TM1	A1	Targeting	BAMBI_+_28966357.23-P1P2	TGCAAGTGTACAAATCCAGCCCACCTTGTTGGCCGCCCCACGGCGTCCGATGTTTAAGAGCTAAGCTGTAGGAAAGGGATCACCGTTC
TM1	A1	Targeting	BAMBI_-_28966154.23-P1P2	TGCAAGTGTACAAATCCAGCCCACCTTGTTGGGGGTTCCCGAGCCGGTCCCGTTTAAGAGCTAAGCTGTAGGAAAGGGATCACCGTTC
TM1	A1	Targeting	BAMBI_-_28966182.23-P1P2	TGCAAGTGTACAAATCCAGCCCACCTTGTTGGCTCCCCCGGCGCCTCGCGAGTTTAAGAGCTAAGCTGTAGGAAAGGGATCACCGTTC
TM1	A1	Targeting	BAMBI_-_28966197.23-P1P2	TGCAAGTGTACAAATCCAGCCCACCTTGTTGGGCGAAGGTCACTGACGCGCGTTTAAGAGCTAAGCTGTAGGAAAGGGATCACCGTTC
TM1	A1	Targeting	BAMBI_-_28966209.23-P1P2	TGCAAGTGTACAAATCCAGCCCACCTTGTTGGGACGCGCAGGCCTCCGCAAGTTTAAGAGCTAAGCTGTAGGAAAGGGATCACCGTTC
TM1	A1	Targeting	BAMBI_-_28966254.23-P1P2	TGCAAGTGTACAAATCCAGCCCACCTTGTTGGCCAGCCGGGCGCCCCAGCCGTTTAAGAGCTAAGCTGTAGGAAAGGGATCACCGTTC
TM1	A1	Targeting	BAMBI_-_28966269.23-P1P2	TGCAAGTGTACAAATCCAGCCCACCTTGTTGGAGCCGGGCGCCCCAGACGCGTTTAAGAGCTAAGCTGTAGGAAAGGGATCACCGTTC
TM1	A1	Targeting	BAMBI_-_28966314.23-P1P2	TGCAAGTGTACAAATCCAGCCCACCTTGTTGGGTCCCCCAGCGCTCGCGTCGTTTAAGAGCTAAGCTGTAGGAAAGGGATCACCGTTC
TM1	A1	Targeting	BAMBI_-_28966346.23-P1P2	TGCAAGTGTACAAATCCAGCCCACCTTGTTGGCGCTGCGGGGCGGATTGACGTTTAAGAGCTAAGCTGTAGGAAAGGGATCACCGTTC
TM1	A1	Targeting	BCAM_+_45312155.23-P1P2	TGCAAGTGTACAAATCCAGCCCACCTTGTTGGCCCAAGCCTAGAGCTGTCCGTTTAAGAGCTAAGCTGTAGGAAAGGGATCACCGTTC
TM1	A1	Targeting	BCAM_+_45312188.23-P1P2	TGCAAGTGTACAAATCCAGCCCACCTTGTTGGAGTGCACGGGGCCAGGCTCGTTTAAGAGCTAAGCTGTAGGAAAGGGATCACCGTTC
TM1	A1	Targeting	BCAM_+_45312194.23-P1P2	TGCAAGTGTACAAATCCAGCCCACCTTGTTGGCCTCCCAGTGCACGGGGCCGTTTAAGAGCTAAGCTGTAGGAAAGGGATCACCGTTC
TM1	A1	Targeting	BCAM_+_45312244.23-P1P2	TGCAAGTGTACAAATCCAGCCCACCTTGTTGGTCCCCCGATGCCCGGGCGCGTTTAAGAGCTAAGCTGTAGGAAAGGGATCACCGTTC
TM1	A1	Targeting	BCAM_-_45312063.23-P1P2	TGCAAGTGTACAAATCCAGCCCACCTTGTTGGGCCCCTGGTCAGAATAACGGTTTAAGAGCTAAGCTGTAGGAAAGGGATCACCGTTC
TM1	A1	Targeting	BCAM_-_45312170.23-P1P2	TGCAAGTGTACAAATCCAGCCCACCTTGTTGGAGTAAGCCCGGACAGCTCTGTTTAAGAGCTAAGCTGTAGGAAAGGGATCACCGTTC
TM1	A1	Targeting	BCAM_-_45312225.23-P1P2	TGCAAGTGTACAAATCCAGCCCACCTTGTTGGTGCACTGGGAGGTCCGCTCGTTTAAGAGCTAAGCTGTAGGAAAGGGATCACCGTTC
TM1	A1	Targeting	BCAM_-_45312261.23-P1P2	TGCAAGTGTACAAATCCAGCCCACCTTGTTGGTGGCCCCGCGCCCGGGCATGTTTAAGAGCTAAGCTGTAGGAAAGGGATCACCGTTC
TM1	A1	Targeting	BCAM_-_45312264.23-P1P2	TGCAAGTGTACAAATCCAGCCCACCTTGTTGGCCCCGCGCCCGGGCATCGGGTTTAAGAGCTAAGCTGTAGGAAAGGGATCACCGTTC
TM1	A1	Targeting	BCAM_-_45312271.23-P1P2	TGCAAGTGTACAAATCCAGCCCACCTTGTTGGCCCGGGCATCGGGGGACGAGTTTAAGAGCTAAGCTGTAGGAAAGGGATCACCGTTC
TM1	A1	Targeting	BDNF_+_27722135.23-P1P2	TGCAAGTGTACAAATCCAGCCCACCTTGTTGGACGCGGCGTTCCCTTTAAGGTTTAAGAGCTAAGCTGTAGGAAAGGGATCACCGTTC
TM1	A1	Targeting	BDNF_+_27722162.23-P1P2	TGCAAGTGTACAAATCCAGCCCACCTTGTTGGCCCCTCGGTTCCCCGCGCGGTTTAAGAGCTAAGCTGTAGGAAAGGGATCACCGTTC
TM1	A1	Targeting	BDNF_+_27722197.23-P1P2	TGCAAGTGTACAAATCCAGCCCACCTTGTTGGAGGACAGGCCCCGGGGGAGGTTTAAGAGCTAAGCTGTAGGAAAGGGATCACCGTTC
TM1	A1	Targeting	BDNF_+_27722224.23-P1P2	TGCAAGTGTACAAATCCAGCCCACCTTGTTGGTGTCGCGGGGCCCTAGGGGGTTTAAGAGCTAAGCTGTAGGAAAGGGATCACCGTTC
TM1	A1	Targeting	BDNF_+_27722227.23-P1P2	TGCAAGTGTACAAATCCAGCCCACCTTGTTGGCGATGTCGCGGGGCCCTAGGTTTAAGAGCTAAGCTGTAGGAAAGGGATCACCGTTC
TM1	A1	Targeting	BDNF_+_27722329.23-P1P2	TGCAAGTGTACAAATCCAGCCCACCTTGTTGGCGGGACGCGGGGTTCCCCGGTTTAAGAGCTAAGCTGTAGGAAAGGGATCACCGTTC
TM1	A1	Targeting	BDNF_+_27722457.23-P1P2	TGCAAGTGTACAAATCCAGCCCACCTTGTTGGAGAACTTGGGTGCTGGGATGTTTAAGAGCTAAGCTGTAGGAAAGGGATCACCGTTC
TM1	A1	Targeting	BDNF_-_27722182.23-P1P2	TGCAAGTGTACAAATCCAGCCCACCTTGTTGGTCCTCGCGCGGGGAACCGAGTTTAAGAGCTAAGCTGTAGGAAAGGGATCACCGTTC
TM1	A1	Targeting	BDNF_-_27722210.23-P1P2	TGCAAGTGTACAAATCCAGCCCACCTTGTTGGGGAACTCCCCGCTCCCCCGGTTTAAGAGCTAAGCTGTAGGAAAGGGATCACCGTTC
TM1	A1	Targeting	BDNF_-_27722307.23-P1P2	TGCAAGTGTACAAATCCAGCCCACCTTGTTGGAGGACGCCCGCGGCTTCGAGTTTAAGAGCTAAGCTGTAGGAAAGGGATCACCGTTC
TM1	A1	Targeting	BET1L_+_207443.23-P1P2	TGCAAGTGTACAAATCCAGCCCACCTTGTTGGGGCTATCTAGGGGCGTGGTGTTTAAGAGCTAAGCTGTAGGAAAGGGATCACCGTTC
TM1	A1	Targeting	BET1L_+_207452.23-P1P2	TGCAAGTGTACAAATCCAGCCCACCTTGTTGGAAGGGGCTGGGCTATCTAGGTTTAAGAGCTAAGCTGTAGGAAAGGGATCACCGTTC
TM1	A1	Targeting	BET1L_+_207470.23-P1P2	TGCAAGTGTACAAATCCAGCCCACCTTGTTGGTCAGCGAGCCCGAAGCGGAGTTTAAGAGCTAAGCTGTAGGAAAGGGATCACCGTTC
TM1	A1	Targeting	BET1L_+_207474.23-P1P2	TGCAAGTGTACAAATCCAGCCCACCTTGTTGGGAAGTCAGCGAGCCCGAAGGTTTAAGAGCTAAGCTGTAGGAAAGGGATCACCGTTC
TM1	A1	Targeting	BET1L_-_207505.23-P1P2	TGCAAGTGTACAAATCCAGCCCACCTTGTTGGCTCGCTGACTTCCGGCTTAGTTTAAGAGCTAAGCTGTAGGAAAGGGATCACCGTTC
TM1	A1	Targeting	BET1L_-_207512.23-P1P2	TGCAAGTGTACAAATCCAGCCCACCTTGTTGGACTTCCGGCTTAGGGCCGAGTTTAAGAGCTAAGCTGTAGGAAAGGGATCACCGTTC
TM1	A1	Targeting	BET1L_-_207516.23-P1P2	TGCAAGTGTACAAATCCAGCCCACCTTGTTGGCCGGCTTAGGGCCGAGGGTGTTTAAGAGCTAAGCTGTAGGAAAGGGATCACCGTTC
TM1	A1	Targeting	BET1L_-_207542.23-P1P2	TGCAAGTGTACAAATCCAGCCCACCTTGTTGGTGCCGGGCGCGGAAGCGATGTTTAAGAGCTAAGCTGTAGGAAAGGGATCACCGTTC
TM1	A1	Targeting	BET1L_-_207553.23-P1P2	TGCAAGTGTACAAATCCAGCCCACCTTGTTGGGAAGCGATGGGCATATCTGGTTTAAGAGCTAAGCTGTAGGAAAGGGATCACCGTTC
TM1	A1	Targeting	BET1L_-_207685.23-P1P2	TGCAAGTGTACAAATCCAGCCCACCTTGTTGGTTGGTGTTCCTGTGAACGTGTTTAAGAGCTAAGCTGTAGGAAAGGGATCACCGTTC
TM1	A1	Targeting	BET1_+_93633761.23-P1P2	TGCAAGTGTACAAATCCAGCCCACCTTGTTGGTCAGCAACACGTTATGCGTGTTTAAGAGCTAAGCTGTAGGAAAGGGATCACCGTTC
TM1	A1	Targeting	BET1_+_93633872.23-P1P2	TGCAAGTGTACAAATCCAGCCCACCTTGTTGGAGCGGAACAGCGGGAACGTGTTTAAGAGCTAAGCTGTAGGAAAGGGATCACCGTTC
TM1	A1	Targeting	BET1_+_93633880.23-P1P2	TGCAAGTGTACAAATCCAGCCCACCTTGTTGGGGGCTGCGAGCGGAACAGCGTTTAAGAGCTAAGCTGTAGGAAAGGGATCACCGTTC
TM1	A1	Targeting	BET1_-_93633705.23-P1P2	TGCAAGTGTACAAATCCAGCCCACCTTGTTGGCCGGATGATGGCGTCACCAGTTTAAGAGCTAAGCTGTAGGAAAGGGATCACCGTTC
TM1	A1	Targeting	BET1_-_93633801.23-P1P2	TGCAAGTGTACAAATCCAGCCCACCTTGTTGGTGAGGGCGTGATGTGAACCGTTTAAGAGCTAAGCTGTAGGAAAGGGATCACCGTTC
TM1	A1	Targeting	BET1_-_93633832.23-P1P2	TGCAAGTGTACAAATCCAGCCCACCTTGTTGGCGGACGGGGCGTCCGGAAAGTTTAAGAGCTAAGCTGTAGGAAAGGGATCACCGTTC
TM1	A1	Targeting	BET1_-_93633835.23-P1P2	TGCAAGTGTACAAATCCAGCCCACCTTGTTGGACGGGGCGTCCGGAAAAGGGTTTAAGAGCTAAGCTGTAGGAAAGGGATCACCGTTC
TM1	A1	Targeting	BET1_-_93633838.23-P1P2	TGCAAGTGTACAAATCCAGCCCACCTTGTTGGGGGCGTCCGGAAAAGGGGGGTTTAAGAGCTAAGCTGTAGGAAAGGGATCACCGTTC
TM1	A1	Targeting	BET1_-_93633850.23-P1P2	TGCAAGTGTACAAATCCAGCCCACCTTGTTGGAAGGGGGCGGCTTCGACTGGTTTAAGAGCTAAGCTGTAGGAAAGGGATCACCGTTC
TM1	A1	Targeting	BET1_-_93633863.23-P1P2	TGCAAGTGTACAAATCCAGCCCACCTTGTTGGCGACTGCGGCTCTGATTCTGTTTAAGAGCTAAGCTGTAGGAAAGGGATCACCGTTC
TM1	A1	Targeting	BMPR1A_+_88515992.23-P1P2	TGCAAGTGTACAAATCCAGCCCACCTTGTTGGAGCACGCGATGGAACGCGGGTTTAAGAGCTAAGCTGTAGGAAAGGGATCACCGTTC
TM1	A1	Targeting	BMPR1A_+_88516101.23-P1P2	TGCAAGTGTACAAATCCAGCCCACCTTGTTGGCTGGTGCGGGCGGGAGTCGGTTTAAGAGCTAAGCTGTAGGAAAGGGATCACCGTTC
TM1	A1	Targeting	BMPR1A_+_88516134.23-P1P2	TGCAAGTGTACAAATCCAGCCCACCTTGTTGGAGGGCCAGCCGCCGGCAAGGTTTAAGAGCTAAGCTGTAGGAAAGGGATCACCGTTC
TM1	A1	Targeting	BMPR1A_+_88516161.23-P1P2	TGCAAGTGTACAAATCCAGCCCACCTTGTTGGGAGCCCGGCGCCCAGTTGCGTTTAAGAGCTAAGCTGTAGGAAAGGGATCACCGTTC
TM1	A1	Targeting	BMPR1A_+_88516182.23-P1P2	TGCAAGTGTACAAATCCAGCCCACCTTGTTGGGAAGCGCCCGAAGAGTTCGGTTTAAGAGCTAAGCTGTAGGAAAGGGATCACCGTTC
TM1	A1	Targeting	BMPR1A_+_88516253.23-P1P2	TGCAAGTGTACAAATCCAGCCCACCTTGTTGGCGCCGCGCGCACCCGACCAGTTTAAGAGCTAAGCTGTAGGAAAGGGATCACCGTTC
TM1	A1	Targeting	BMPR1A_+_88516285.23-P1P2	TGCAAGTGTACAAATCCAGCCCACCTTGTTGGCGGCGCGCGCGCACTGGGAGTTTAAGAGCTAAGCTGTAGGAAAGGGATCACCGTTC
TM1	A1	Targeting	BMPR1A_-_88516074.23-P1P2	TGCAAGTGTACAAATCCAGCCCACCTTGTTGGTGGGGCTGGCTTGTGGGGAGTTTAAGAGCTAAGCTGTAGGAAAGGGATCACCGTTC
TM1	A1	Targeting	BMPR1A_-_88516196.23-P1P2	TGCAAGTGTACAAATCCAGCCCACCTTGTTGGCCGGGCTCCGCGAACTCTTGTTTAAGAGCTAAGCTGTAGGAAAGGGATCACCGTTC
TM1	A1	Targeting	BMPR1A_-_88516386.23-P1P2	TGCAAGTGTACAAATCCAGCCCACCTTGTTGGCCCTCCTGGCAAGAGTCGGGTTTAAGAGCTAAGCTGTAGGAAAGGGATCACCGTTC
TM1	A1	Targeting	BMPR1B_+_95678821.23-P1P2	TGCAAGTGTACAAATCCAGCCCACCTTGTTGGCGGAGGCAGCCCGGGTACAGTTTAAGAGCTAAGCTGTAGGAAAGGGATCACCGTTC
TM1	A1	Targeting	BMPR1B_+_95678880.23-P1P2	TGCAAGTGTACAAATCCAGCCCACCTTGTTGGCAGCGCCGCCGCCTGTGTGGTTTAAGAGCTAAGCTGTAGGAAAGGGATCACCGTTC
TM1	A1	Targeting	BMPR1B_+_95678962.23-P1P2	TGCAAGTGTACAAATCCAGCCCACCTTGTTGGTCCAGCTCCCACTAGTGATGTTTAAGAGCTAAGCTGTAGGAAAGGGATCACCGTTC
TM1	A1	Targeting	BMPR1B_-_95678784.23-P1P2	TGCAAGTGTACAAATCCAGCCCACCTTGTTGGACCCATGAGGGAAATCTTGGTTTAAGAGCTAAGCTGTAGGAAAGGGATCACCGTTC
TM1	A1	Targeting	BMPR1B_-_95678800.23-P1P2	TGCAAGTGTACAAATCCAGCCCACCTTGTTGGTTGGGGATGCTCTGAGCAGGTTTAAGAGCTAAGCTGTAGGAAAGGGATCACCGTTC
TM1	A1	Targeting	BMPR1B_-_95678806.23-P1P2	TGCAAGTGTACAAATCCAGCCCACCTTGTTGGATGCTCTGAGCAGCGGACGGTTTAAGAGCTAAGCTGTAGGAAAGGGATCACCGTTC
TM1	A1	Targeting	BMPR1B_-_95678833.23-P1P2	TGCAAGTGTACAAATCCAGCCCACCTTGTTGGGAAGCGCACCCCTGTACCCGTTTAAGAGCTAAGCTGTAGGAAAGGGATCACCGTTC
TM1	A1	Targeting	BMPR1B_-_95678896.23-P1P2	TGCAAGTGTACAAATCCAGCCCACCTTGTTGGGCACTCCGCACACAGGCGGGTTTAAGAGCTAAGCTGTAGGAAAGGGATCACCGTTC
TM1	A1	Targeting	BMPR1B_-_95678951.23-P1P2	TGCAAGTGTACAAATCCAGCCCACCTTGTTGGAATCCCTCCGCTAAGTACTGTTTAAGAGCTAAGCTGTAGGAAAGGGATCACCGTTC
TM1	A1	Targeting	BMPR1B_-_95678988.23-P1P2	TGCAAGTGTACAAATCCAGCCCACCTTGTTGGCACTAGTGGGAGCTGGAGAGTTTAAGAGCTAAGCTGTAGGAAAGGGATCACCGTTC
TM1	A1	Targeting	BOC_+_112929920.23-P1P2	TGCAAGTGTACAAATCCAGCCCACCTTGTTGGTCAGAAAATGGGACAGCGGGTTTAAGAGCTAAGCTGTAGGAAAGGGATCACCGTTC
TM1	A1	Targeting	BOC_+_112930232.23-P1P2	TGCAAGTGTACAAATCCAGCCCACCTTGTTGGAAAAGTCCCCCAAACTCTAGTTTAAGAGCTAAGCTGTAGGAAAGGGATCACCGTTC
TM1	A1	Targeting	BOC_-_112929863.23-P1P2	TGCAAGTGTACAAATCCAGCCCACCTTGTTGGCCTCCCCAACCGACCGAGGGTTTAAGAGCTAAGCTGTAGGAAAGGGATCACCGTTC
TM1	A1	Targeting	BOC_-_112930047.23-P1P2	TGCAAGTGTACAAATCCAGCCCACCTTGTTGGAAGAGACTAGGCGAAAGGAGTTTAAGAGCTAAGCTGTAGGAAAGGGATCACCGTTC
TM1	A1	Targeting	BOC_-_112930137.23-P1P2	TGCAAGTGTACAAATCCAGCCCACCTTGTTGGCCCCTGGGTTCGGGGAAAAGTTTAAGAGCTAAGCTGTAGGAAAGGGATCACCGTTC
TM1	A1	Targeting	BOC_-_112930181.23-P1P2	TGCAAGTGTACAAATCCAGCCCACCTTGTTGGGGAAAGCAAAAGAAGTTGGGTTTAAGAGCTAAGCTGTAGGAAAGGGATCACCGTTC
TM1	A1	Targeting	BOC_-_112930198.23-P1P2	TGCAAGTGTACAAATCCAGCCCACCTTGTTGGGGAGGAGAGCGCGGGTCTGGTTTAAGAGCTAAGCTGTAGGAAAGGGATCACCGTTC
TM1	A1	Targeting	BOC_-_112930214.23-P1P2	TGCAAGTGTACAAATCCAGCCCACCTTGTTGGCTGAGGCACAGCAAAAAGTGTTTAAGAGCTAAGCTGTAGGAAAGGGATCACCGTTC
TM1	A1	Targeting	BOC_-_112930224.23-P1P2	TGCAAGTGTACAAATCCAGCCCACCTTGTTGGGCAAAAAGTGGGTGTTAACGTTTAAGAGCTAAGCTGTAGGAAAGGGATCACCGTTC
TM1	A1	Targeting	BOC_-_112930245.23-P1P2	TGCAAGTGTACAAATCCAGCCCACCTTGTTGGGAAAACTGCCCTAGAGTTTGTTTAAGAGCTAAGCTGTAGGAAAGGGATCACCGTTC
TM1	A1	Targeting	BRICD5_+_2260990.23-P1P2	TGCAAGTGTACAAATCCAGCCCACCTTGTTGGTGACAGGCATCCCCCAGGTGTTTAAGAGCTAAGCTGTAGGAAAGGGATCACCGTTC
TM1	A1	Targeting	BRICD5_+_2260994.23-P1P2	TGCAAGTGTACAAATCCAGCCCACCTTGTTGGCTGGTGACAGGCATCCCCCGTTTAAGAGCTAAGCTGTAGGAAAGGGATCACCGTTC
TM1	A1	Targeting	BRICD5_+_2261120.23-P1P2	TGCAAGTGTACAAATCCAGCCCACCTTGTTGGAGTCACCCTGGCCGGGCCTGTTTAAGAGCTAAGCTGTAGGAAAGGGATCACCGTTC
TM1	A1	Targeting	BRICD5_-_2261057.23-P1P2	TGCAAGTGTACAAATCCAGCCCACCTTGTTGGCCTGTGCAGACTGGAGCTCGTTTAAGAGCTAAGCTGTAGGAAAGGGATCACCGTTC
TM1	A1	Targeting	BRICD5_-_2261064.23-P1P2	TGCAAGTGTACAAATCCAGCCCACCTTGTTGGAGACTGGAGCTCAGGGTCTGTTTAAGAGCTAAGCTGTAGGAAAGGGATCACCGTTC
TM1	A1	Targeting	BRICD5_-_2261074.23-P1P2	TGCAAGTGTACAAATCCAGCCCACCTTGTTGGTCAGGGTCTGGGAGGCGTAGTTTAAGAGCTAAGCTGTAGGAAAGGGATCACCGTTC
TM1	A1	Targeting	BRICD5_-_2261079.23-P1P2	TGCAAGTGTACAAATCCAGCCCACCTTGTTGGGTCTGGGAGGCGTAGGGCTGTTTAAGAGCTAAGCTGTAGGAAAGGGATCACCGTTC
TM1	A1	Targeting	BRICD5_-_2261100.23-P1P2	TGCAAGTGTACAAATCCAGCCCACCTTGTTGGGCCGCGTGGAAATCCAGTCGTTTAAGAGCTAAGCTGTAGGAAAGGGATCACCGTTC
TM1	A1	Targeting	BRICD5_-_2261153.23-P1P2	TGCAAGTGTACAAATCCAGCCCACCTTGTTGGCAGGGTGACTCGCTAAGTGGTTTAAGAGCTAAGCTGTAGGAAAGGGATCACCGTTC
TM1	A1	Targeting	BRICD5_-_2261159.23-P1P2	TGCAAGTGTACAAATCCAGCCCACCTTGTTGGGACTCGCTAAGTGTGGTTGGTTTAAGAGCTAAGCTGTAGGAAAGGGATCACCGTTC
TM1	A1	Targeting	BST2_+_17516569.23-P1P2	TGCAAGTGTACAAATCCAGCCCACCTTGTTGGAAAAAGCCCACCTCCTTTCGTTTAAGAGCTAAGCTGTAGGAAAGGGATCACCGTTC
TM1	A1	Targeting	BST2_+_17516597.23-P1P2	TGCAAGTGTACAAATCCAGCCCACCTTGTTGGGCCCAAGGGCTTTTAAAGCGTTTAAGAGCTAAGCTGTAGGAAAGGGATCACCGTTC
TM1	A1	Targeting	BST2_+_17516610.23-P1P2	TGCAAGTGTACAAATCCAGCCCACCTTGTTGGCCAGCTGGGAAGGGCCCAAGTTTAAGAGCTAAGCTGTAGGAAAGGGATCACCGTTC
TM1	A1	Targeting	BST2_+_17516639.23-P1P2	TGCAAGTGTACAAATCCAGCCCACCTTGTTGGTGTCCCAGGCAGCCACAGTGTTTAAGAGCTAAGCTGTAGGAAAGGGATCACCGTTC
TM1	A1	Targeting	BST2_+_17516663.23-P1P2	TGCAAGTGTACAAATCCAGCCCACCTTGTTGGGAGGCACAGGGACTTAAGAGTTTAAGAGCTAAGCTGTAGGAAAGGGATCACCGTTC
TM1	A1	Targeting	BST2_-_17516535.23-P1P2	TGCAAGTGTACAAATCCAGCCCACCTTGTTGGTCTTGCATGAGGCACCTACGTTTAAGAGCTAAGCTGTAGGAAAGGGATCACCGTTC
TM1	A1	Targeting	BST2_-_17516541.23-P1P2	TGCAAGTGTACAAATCCAGCCCACCTTGTTGGATGAGGCACCTACAGGCAGGTTTAAGAGCTAAGCTGTAGGAAAGGGATCACCGTTC
TM1	A1	Targeting	BST2_-_17516551.23-P1P2	TGCAAGTGTACAAATCCAGCCCACCTTGTTGGTACAGGCAGAGGATTAATTGTTTAAGAGCTAAGCTGTAGGAAAGGGATCACCGTTC
TM1	A1	Targeting	BST2_-_17516815.23-P1P2	TGCAAGTGTACAAATCCAGCCCACCTTGTTGGAGGTTGCACAGTTGCGTGGGTTTAAGAGCTAAGCTGTAGGAAAGGGATCACCGTTC
TM1	A1	Targeting	BST2_-_17516960.23-P1P2	TGCAAGTGTACAAATCCAGCCCACCTTGTTGGGGACTATGGGAGACATGGAGTTTAAGAGCTAAGCTGTAGGAAAGGGATCACCGTTC
TM1	A1	Targeting	BTC_+_75719831.23-P1P2	TGCAAGTGTACAAATCCAGCCCACCTTGTTGGGGTGTGGGGCAATTTGGGTGTTTAAGAGCTAAGCTGTAGGAAAGGGATCACCGTTC
TM1	A1	Targeting	BTC_+_75719835.23-P1P2	TGCAAGTGTACAAATCCAGCCCACCTTGTTGGTATGGGTGTGGGGCAATTTGTTTAAGAGCTAAGCTGTAGGAAAGGGATCACCGTTC
TM1	A1	Targeting	BTC_+_75719851.23-P1P2	TGCAAGTGTACAAATCCAGCCCACCTTGTTGGTGTCCCTGGGTGTGGGTATGTTTAAGAGCTAAGCTGTAGGAAAGGGATCACCGTTC
TM1	A1	Targeting	BTC_+_75719863.23-P1P2	TGCAAGTGTACAAATCCAGCCCACCTTGTTGGGCAGCCCGAATATGTCCCTGTTTAAGAGCTAAGCTGTAGGAAAGGGATCACCGTTC
TM1	A1	Targeting	BTC_+_75719884.23-P1P2	TGCAAGTGTACAAATCCAGCCCACCTTGTTGGGAGTGGTGAGCTGGTCCGAGTTTAAGAGCTAAGCTGTAGGAAAGGGATCACCGTTC
TM1	A1	Targeting	BTC_+_75719922.23-P1P2	TGCAAGTGTACAAATCCAGCCCACCTTGTTGGGGGAAATGAACAGTCAGTCGTTTAAGAGCTAAGCTGTAGGAAAGGGATCACCGTTC
TM1	A1	Targeting	BTC_-_75719879.23-P1P2	TGCAAGTGTACAAATCCAGCCCACCTTGTTGGCCACACCCAGGGACATATTGTTTAAGAGCTAAGCTGTAGGAAAGGGATCACCGTTC
TM1	A1	Targeting	BTC_-_75719975.23-P1P2	TGCAAGTGTACAAATCCAGCCCACCTTGTTGGGGCGTAAACAAGGTAGGGAGTTTAAGAGCTAAGCTGTAGGAAAGGGATCACCGTTC
TM1	A1	Targeting	BTC_-_75720007.23-P1P2	TGCAAGTGTACAAATCCAGCCCACCTTGTTGGAATCCGCGTGGAGGGGTGTGTTTAAGAGCTAAGCTGTAGGAAAGGGATCACCGTTC
TM1	A1	Targeting	BTC_-_75720010.23-P1P2	TGCAAGTGTACAAATCCAGCCCACCTTGTTGGCCGCGTGGAGGGGTGTCGGGTTTAAGAGCTAAGCTGTAGGAAAGGGATCACCGTTC
TM1	A1	Targeting	BTLA_+_112218504.23-P1P2	TGCAAGTGTACAAATCCAGCCCACCTTGTTGGAAAAACGTGGTAGAGCGGAGTTTAAGAGCTAAGCTGTAGGAAAGGGATCACCGTTC
TM1	A1	Targeting	BTLA_+_112218508.23-P1P2	TGCAAGTGTACAAATCCAGCCCACCTTGTTGGGGGCAAAAACGTGGTAGAGGTTTAAGAGCTAAGCTGTAGGAAAGGGATCACCGTTC
TM1	A1	Targeting	BTLA_+_112218516.23-P1P2	TGCAAGTGTACAAATCCAGCCCACCTTGTTGGTCAACCTGGGGCAAAAACGGTTTAAGAGCTAAGCTGTAGGAAAGGGATCACCGTTC
TM1	A1	Targeting	BTLA_+_112218529.23-P1P2	TGCAAGTGTACAAATCCAGCCCACCTTGTTGGTGCAGGAAAAACCTCAACCGTTTAAGAGCTAAGCTGTAGGAAAGGGATCACCGTTC
TM1	A1	Targeting	BTLA_+_112218545.23-P1P2	TGCAAGTGTACAAATCCAGCCCACCTTGTTGGTTCACTGAACATTGAGTGCGTTTAAGAGCTAAGCTGTAGGAAAGGGATCACCGTTC
TM1	A1	Targeting	BTLA_+_112218682.23-P1P2	TGCAAGTGTACAAATCCAGCCCACCTTGTTGGAATCACAAGCTATCACAAAGTTTAAGAGCTAAGCTGTAGGAAAGGGATCACCGTTC
TM1	A1	Targeting	BTLA_+_112218791.23-P1P2	TGCAAGTGTACAAATCCAGCCCACCTTGTTGGACCTGAGATAAATCTTCACGTTTAAGAGCTAAGCTGTAGGAAAGGGATCACCGTTC
TM1	A1	Targeting	BTLA_-_112218375.23-P1P2	TGCAAGTGTACAAATCCAGCCCACCTTGTTGGGAGGAGAGTAGGAAGAGCCGTTTAAGAGCTAAGCTGTAGGAAAGGGATCACCGTTC
TM1	A1	Targeting	BTLA_-_112218414.23-P1P2	TGCAAGTGTACAAATCCAGCCCACCTTGTTGGAGTGAACAGAAAGACGATGGTTTAAGAGCTAAGCTGTAGGAAAGGGATCACCGTTC
TM1	A1	Targeting	BTLA_-_112218429.23-P1P2	TGCAAGTGTACAAATCCAGCCCACCTTGTTGGGATGTGGTACTCTGTTCTGGTTTAAGAGCTAAGCTGTAGGAAAGGGATCACCGTTC
TM1	A1	Targeting	BTN1A1_+_26501219.23-ENST00000244513.6	TGCAAGTGTACAAATCCAGCCCACCTTGTTGGAGGCATAACACTCATTAGTGTTTAAGAGCTAAGCTGTAGGAAAGGGATCACCGTTC
TM1	A1	Targeting	BTN1A1_+_26501248.23-ENST00000244513.6	TGCAAGTGTACAAATCCAGCCCACCTTGTTGGACTCTAAAACTTAGGAGAAGTTTAAGAGCTAAGCTGTAGGAAAGGGATCACCGTTC
TM1	A1	Targeting	BTN1A1_+_26501255.23-ENST00000244513.6	TGCAAGTGTACAAATCCAGCCCACCTTGTTGGTACTCTAACTCTAAAACTTGTTTAAGAGCTAAGCTGTAGGAAAGGGATCACCGTTC
TM1	A1	Targeting	BTN1A1_+_26501316.23-ENST00000244513.6	TGCAAGTGTACAAATCCAGCCCACCTTGTTGGTCAGCCTCCATCCCCAGTAGTTTAAGAGCTAAGCTGTAGGAAAGGGATCACCGTTC
TM1	A1	Targeting	BTN1A1_-_26501285.23-ENST00000244513.6	TGCAAGTGTACAAATCCAGCCCACCTTGTTGGTAGAGTTAGAGTAGTGGGTGTTTAAGAGCTAAGCTGTAGGAAAGGGATCACCGTTC
TM1	A1	Targeting	BTN1A1_-_26501325.23-ENST00000244513.6	TGCAAGTGTACAAATCCAGCCCACCTTGTTGGTAAACTAAAAATCCATACTGTTTAAGAGCTAAGCTGTAGGAAAGGGATCACCGTTC
TM1	A1	Targeting	BTN1A1_-_26501330.23-ENST00000244513.6	TGCAAGTGTACAAATCCAGCCCACCTTGTTGGTAAAAATCCATACTGGGGAGTTTAAGAGCTAAGCTGTAGGAAAGGGATCACCGTTC
TM1	A1	Targeting	BTN1A1_-_26501333.23-ENST00000244513.6	TGCAAGTGTACAAATCCAGCCCACCTTGTTGGAAATCCATACTGGGGATGGGTTTAAGAGCTAAGCTGTAGGAAAGGGATCACCGTTC
TM1	A1	Targeting	BTN1A1_-_26501396.23-ENST00000244513.6	TGCAAGTGTACAAATCCAGCCCACCTTGTTGGGCTGGAAAGAACTGTAGAGGTTTAAGAGCTAAGCTGTAGGAAAGGGATCACCGTTC
TM1	A1	Targeting	BTN1A1_-_26501414.23-ENST00000244513.6	TGCAAGTGTACAAATCCAGCCCACCTTGTTGGGAGGACTTTGGAAAGCGGAGTTTAAGAGCTAAGCTGTAGGAAAGGGATCACCGTTC
TM1	A1	Targeting	BTN2A1_+_26457711.23-P1P2	TGCAAGTGTACAAATCCAGCCCACCTTGTTGGGGAGCGCAGGAGGGCTTGGGTTTAAGAGCTAAGCTGTAGGAAAGGGATCACCGTTC
TM1	A1	Targeting	BTN2A1_+_26457820.23-P1P2	TGCAAGTGTACAAATCCAGCCCACCTTGTTGGGTAGAGGGCAATTTTGCTGGTTTAAGAGCTAAGCTGTAGGAAAGGGATCACCGTTC
TM1	A1	Targeting	BTN2A1_+_26457851.23-P1P2	TGCAAGTGTACAAATCCAGCCCACCTTGTTGGTGCTGGTGTCCACAAGGAGGTTTAAGAGCTAAGCTGTAGGAAAGGGATCACCGTTC
TM1	A1	Targeting	BTN2A1_+_26457876.23-P1P2	TGCAAGTGTACAAATCCAGCCCACCTTGTTGGGGTTTGTCACTGAGGTCGGGTTTAAGAGCTAAGCTGTAGGAAAGGGATCACCGTTC
TM1	A1	Targeting	BTN2A1_+_26457896.23-P1P2	TGCAAGTGTACAAATCCAGCCCACCTTGTTGGTCCTTGGGGAGATTCCCTGGTTTAAGAGCTAAGCTGTAGGAAAGGGATCACCGTTC
TM1	A1	Targeting	BTN2A1_+_26457910.23-P1P2	TGCAAGTGTACAAATCCAGCCCACCTTGTTGGTCTCGCTTTGAGATTCCTTGTTTAAGAGCTAAGCTGTAGGAAAGGGATCACCGTTC
TM1	A1	Targeting	BTN2A1_-_26457766.23-P1P2	TGCAAGTGTACAAATCCAGCCCACCTTGTTGGCAAAGCCAGCAACTTGAACGTTTAAGAGCTAAGCTGTAGGAAAGGGATCACCGTTC
TM1	A1	Targeting	BTN2A1_-_26457903.23-P1P2	TGCAAGTGTACAAATCCAGCCCACCTTGTTGGACCTCAGTGACAAACCCCAGTTTAAGAGCTAAGCTGTAGGAAAGGGATCACCGTTC
TM1	A1	Targeting	BTN2A1_-_26458133.23-P1P2	TGCAAGTGTACAAATCCAGCCCACCTTGTTGGCTCACACCCGGCCAATCCTGTTTAAGAGCTAAGCTGTAGGAAAGGGATCACCGTTC
TM1	A1	Targeting	BTN2A1_-_26458167.23-P1P2	TGCAAGTGTACAAATCCAGCCCACCTTGTTGGTAGGGAACTCTTGGGACTGGTTTAAGAGCTAAGCTGTAGGAAAGGGATCACCGTTC
TM1	A1	Targeting	BTN3A1_+_26401925.23-P1P2	TGCAAGTGTACAAATCCAGCCCACCTTGTTGGCAGGTGCTCGCCCCATGCCGTTTAAGAGCTAAGCTGTAGGAAAGGGATCACCGTTC
TM1	A1	Targeting	BTN3A1_+_26401951.23-P1P2	TGCAAGTGTACAAATCCAGCCCACCTTGTTGGCCTCAGCTCCTGAATAACTGTTTAAGAGCTAAGCTGTAGGAAAGGGATCACCGTTC
TM1	A1	Targeting	BTN3A1_+_26402100.23-P1P2	TGCAAGTGTACAAATCCAGCCCACCTTGTTGGAGTCAAATAAACGTATGAAGTTTAAGAGCTAAGCTGTAGGAAAGGGATCACCGTTC
TM1	A1	Targeting	BTN3A1_+_26402139.23-P1P2	TGCAAGTGTACAAATCCAGCCCACCTTGTTGGGAATATGGGTACATGGAGGGTTTAAGAGCTAAGCTGTAGGAAAGGGATCACCGTTC
TM1	A1	Targeting	BTN3A1_+_26402145.23-P1P2	TGCAAGTGTACAAATCCAGCCCACCTTGTTGGTTGCATGAATATGGGTACAGTTTAAGAGCTAAGCTGTAGGAAAGGGATCACCGTTC
TM1	A1	Targeting	BTN3A1_+_26402226.23-P1P2	TGCAAGTGTACAAATCCAGCCCACCTTGTTGGATGGGAAAAGATTTTAATGGTTTAAGAGCTAAGCTGTAGGAAAGGGATCACCGTTC
TM1	A1	Targeting	BTN3A1_+_26402243.23-P1P2	TGCAAGTGTACAAATCCAGCCCACCTTGTTGGAATATCAGCAGAACACAATGTTTAAGAGCTAAGCTGTAGGAAAGGGATCACCGTTC
TM1	A1	Targeting	BTN3A1_-_26402348.23-P1P2	TGCAAGTGTACAAATCCAGCCCACCTTGTTGGTGAAAGAGATAAACAGTAAGTTTAAGAGCTAAGCTGTAGGAAAGGGATCACCGTTC
TM1	A1	Targeting	BTN3A1_-_26402351.23-P1P2	TGCAAGTGTACAAATCCAGCCCACCTTGTTGGAAGAGATAAACAGTAAGGGGTTTAAGAGCTAAGCTGTAGGAAAGGGATCACCGTTC
TM1	A1	Targeting	BTN3A1_-_26402355.23-P1P2	TGCAAGTGTACAAATCCAGCCCACCTTGTTGGGATAAACAGTAAGGGAGGTGTTTAAGAGCTAAGCTGTAGGAAAGGGATCACCGTTC
TM1	A1	Targeting	BTN3A2_+_26364953.23-P1P2	TGCAAGTGTACAAATCCAGCCCACCTTGTTGGGGCATTTAGGCTTAGGATAGTTTAAGAGCTAAGCTGTAGGAAAGGGATCACCGTTC
TM1	A1	Targeting	BTN3A2_+_26364959.23-P1P2	TGCAAGTGTACAAATCCAGCCCACCTTGTTGGACTTCTGGCATTTAGGCTTGTTTAAGAGCTAAGCTGTAGGAAAGGGATCACCGTTC
TM1	A1	Targeting	BTN3A2_+_26365049.23-P1P2	TGCAAGTGTACAAATCCAGCCCACCTTGTTGGGATAGGTACGTAGAAGAGGGTTTAAGAGCTAAGCTGTAGGAAAGGGATCACCGTTC
TM1	A1	Targeting	BTN3A2_+_26365052.23-P1P2	TGCAAGTGTACAAATCCAGCCCACCTTGTTGGGTAGATAGGTACGTAGAAGGTTTAAGAGCTAAGCTGTAGGAAAGGGATCACCGTTC
TM1	A1	Targeting	BTN3A2_+_26365065.23-P1P2	TGCAAGTGTACAAATCCAGCCCACCTTGTTGGAGTTTGCTTGCATGTAGATGTTTAAGAGCTAAGCTGTAGGAAAGGGATCACCGTTC
TM1	A1	Targeting	BTN3A2_+_26365150.23-P1P2	TGCAAGTGTACAAATCCAGCCCACCTTGTTGGAATATTAGCAGAATGGAGTGTTTAAGAGCTAAGCTGTAGGAAAGGGATCACCGTTC
TM1	A1	Targeting	BTN3A2_+_26365416.23-P1P2	TGCAAGTGTACAAATCCAGCCCACCTTGTTGGAACAGTAAGAGTCGCTCTTGTTTAAGAGCTAAGCTGTAGGAAAGGGATCACCGTTC
TM1	A1	Targeting	BTN3A2_-_26365201.23-P1P2	TGCAAGTGTACAAATCCAGCCCACCTTGTTGGCATGTAAAAGACACGAGACGTTTAAGAGCTAAGCTGTAGGAAAGGGATCACCGTTC
TM1	A1	Targeting	BTN3A2_-_26365356.23-P1P2	TGCAAGTGTACAAATCCAGCCCACCTTGTTGGTCATTTCAACGTTCCTCAGGTTTAAGAGCTAAGCTGTAGGAAAGGGATCACCGTTC
TM1	A1	Targeting	BTN3A2_-_26365445.23-P1P2	TGCAAGTGTACAAATCCAGCCCACCTTGTTGGCGACTCTTACTGTTTCTCAGTTTAAGAGCTAAGCTGTAGGAAAGGGATCACCGTTC
TM1	A1	Targeting	BTN3A3_+_26440191.23-P1P2	TGCAAGTGTACAAATCCAGCCCACCTTGTTGGGACATTTTTTACCTTTTTCGTTTAAGAGCTAAGCTGTAGGAAAGGGATCACCGTTC
TM1	A1	Targeting	BTN3A3_+_26440234.23-P1P2	TGCAAGTGTACAAATCCAGCCCACCTTGTTGGTCAAATAATATAATGTTTCGTTTAAGAGCTAAGCTGTAGGAAAGGGATCACCGTTC
TM1	A1	Targeting	BTN3A3_+_26440319.23-P1P2	TGCAAGTGTACAAATCCAGCCCACCTTGTTGGCGTCAAATAAATGTATACAGTTTAAGAGCTAAGCTGTAGGAAAGGGATCACCGTTC
TM1	A1	Targeting	BTN3A3_+_26440355.23-P1P2	TGCAAGTGTACAAATCCAGCCCACCTTGTTGGGAATATGGGTACCTGAAGGGTTTAAGAGCTAAGCTGTAGGAAAGGGATCACCGTTC
TM1	A1	Targeting	BTN3A3_+_26440358.23-P1P2	TGCAAGTGTACAAATCCAGCCCACCTTGTTGGCATGAATATGGGTACCTGAGTTTAAGAGCTAAGCTGTAGGAAAGGGATCACCGTTC
TM1	A1	Targeting	BTN3A3_+_26440442.23-P1P2	TGCAAGTGTACAAATCCAGCCCACCTTGTTGGATGAGAAAAGATTATAATGGTTTAAGAGCTAAGCTGTAGGAAAGGGATCACCGTTC
TM1	A1	Targeting	BTN3A3_+_26440647.23-P1P2	TGCAAGTGTACAAATCCAGCCCACCTTGTTGGTGGGAGGAAACCACTGAGGGTTTAAGAGCTAAGCTGTAGGAAAGGGATCACCGTTC
TM1	A1	Targeting	BTN3A3_-_26440310.23-P1P2	TGCAAGTGTACAAATCCAGCCCACCTTGTTGGTAAAAATGTGCATTGCGTCGTTTAAGAGCTAAGCTGTAGGAAAGGGATCACCGTTC
TM1	A1	Targeting	BTN3A3_-_26440365.23-P1P2	TGCAAGTGTACAAATCCAGCCCACCTTGTTGGTAGTAAAATCTCCTCCTTCGTTTAAGAGCTAAGCTGTAGGAAAGGGATCACCGTTC
TM1	A1	Targeting	BTN3A3_-_26440532.23-P1P2	TGCAAGTGTACAAATCCAGCCCACCTTGTTGGGTAGAAATACTTATATACAGTTTAAGAGCTAAGCTGTAGGAAAGGGATCACCGTTC
TM1	A1	Targeting	BTNL2_+_32379629.23-P1P2	TGCAAGTGTACAAATCCAGCCCACCTTGTTGGTGTGTGAGGACCTAACTGGGTTTAAGAGCTAAGCTGTAGGAAAGGGATCACCGTTC
TM1	A1	Targeting	BTNL2_+_32379632.23-P1P2	TGCAAGTGTACAAATCCAGCCCACCTTGTTGGGTCTGTGTGAGGACCTAACGTTTAAGAGCTAAGCTGTAGGAAAGGGATCACCGTTC
TM1	A1	Targeting	BTNL2_+_32379654.23-P1P2	TGCAAGTGTACAAATCCAGCCCACCTTGTTGGCGCTGATGTGTGGGACGGTGTTTAAGAGCTAAGCTGTAGGAAAGGGATCACCGTTC
TM1	A1	Targeting	BTNL2_+_32379662.23-P1P2	TGCAAGTGTACAAATCCAGCCCACCTTGTTGGATAGCACCCGCTGATGTGTGTTTAAGAGCTAAGCTGTAGGAAAGGGATCACCGTTC
TM1	A1	Targeting	BTNL2_+_32379692.23-P1P2	TGCAAGTGTACAAATCCAGCCCACCTTGTTGGTGATGTGTGGCAAGGTGGAGTTTAAGAGCTAAGCTGTAGGAAAGGGATCACCGTTC
TM1	A1	Targeting	BTNL2_+_32379720.23-P1P2	TGCAAGTGTACAAATCCAGCCCACCTTGTTGGTGGAGACTTGGCACTAGTTGTTTAAGAGCTAAGCTGTAGGAAAGGGATCACCGTTC
TM1	A1	Targeting	BTNL2_-_32379615.23-P1P2	TGCAAGTGTACAAATCCAGCCCACCTTGTTGGAAAGCCAAGGCCTTCATGGGTTTAAGAGCTAAGCTGTAGGAAAGGGATCACCGTTC
TM1	A1	Targeting	BTNL2_-_32379640.23-P1P2	TGCAAGTGTACAAATCCAGCCCACCTTGTTGGCATCTGCAACCCCCCAGTTGTTTAAGAGCTAAGCTGTAGGAAAGGGATCACCGTTC
TM1	A1	Targeting	BTNL2_-_32379763.23-P1P2	TGCAAGTGTACAAATCCAGCCCACCTTGTTGGCCAGAGCATGGCACTCATCGTTTAAGAGCTAAGCTGTAGGAAAGGGATCACCGTTC
TM1	A1	Targeting	BTNL2_-_32379889.23-P1P2	TGCAAGTGTACAAATCCAGCCCACCTTGTTGGCTGGGCCAAGGTCCCTTGTGTTTAAGAGCTAAGCTGTAGGAAAGGGATCACCGTTC
TM1	A1	Targeting	BTNL3_+_180415293.23-P1P2	TGCAAGTGTACAAATCCAGCCCACCTTGTTGGAAAGAGATCATCTCAGCACGTTTAAGAGCTAAGCTGTAGGAAAGGGATCACCGTTC
TM1	A1	Targeting	BTNL3_+_180415618.23-P1P2	TGCAAGTGTACAAATCCAGCCCACCTTGTTGGCTGTCCCTGAAAGAGAGATGTTTAAGAGCTAAGCTGTAGGAAAGGGATCACCGTTC
TM1	A1	Targeting	BTNL3_+_180415715.23-P1P2	TGCAAGTGTACAAATCCAGCCCACCTTGTTGGTCTGGGTTGTGCCCCACATGTTTAAGAGCTAAGCTGTAGGAAAGGGATCACCGTTC
TM1	A1	Targeting	BTNL3_+_180415731.23-P1P2	TGCAAGTGTACAAATCCAGCCCACCTTGTTGGCTTGGAGGGACTTTGTTCTGTTTAAGAGCTAAGCTGTAGGAAAGGGATCACCGTTC
TM1	A1	Targeting	BTNL3_+_180415744.23-P1P2	TGCAAGTGTACAAATCCAGCCCACCTTGTTGGAGAGTAGGGTACACTTGGAGTTTAAGAGCTAAGCTGTAGGAAAGGGATCACCGTTC
TM1	A1	Targeting	BTNL3_+_180415748.23-P1P2	TGCAAGTGTACAAATCCAGCCCACCTTGTTGGAAAGAGAGTAGGGTACACTGTTTAAGAGCTAAGCTGTAGGAAAGGGATCACCGTTC
TM1	A1	Targeting	BTNL3_+_180415757.23-P1P2	TGCAAGTGTACAAATCCAGCCCACCTTGTTGGTGATAATGGAAAGAGAGTAGTTTAAGAGCTAAGCTGTAGGAAAGGGATCACCGTTC
TM1	A1	Targeting	BTNL3_+_180415808.23-P1P2	TGCAAGTGTACAAATCCAGCCCACCTTGTTGGAGTCACTGCATTTATTGGCGTTTAAGAGCTAAGCTGTAGGAAAGGGATCACCGTTC
TM1	A1	Targeting	BTNL3_+_180415850.23-P1P2	TGCAAGTGTACAAATCCAGCCCACCTTGTTGGAAACATGGCTGTATGAATGGTTTAAGAGCTAAGCTGTAGGAAAGGGATCACCGTTC
TM1	A1	Targeting	BTNL3_-_180415723.23-P1P2	TGCAAGTGTACAAATCCAGCCCACCTTGTTGGCATTCCTTTACCACCTATGGTTTAAGAGCTAAGCTGTAGGAAAGGGATCACCGTTC
TM1	A1	Targeting	BTNL8_+_180325743.23-P1P2	TGCAAGTGTACAAATCCAGCCCACCTTGTTGGGGCCAGGACTGTAATCATGGTTTAAGAGCTAAGCTGTAGGAAAGGGATCACCGTTC
TM1	A1	Targeting	BTNL8_+_180325920.23-P1P2	TGCAAGTGTACAAATCCAGCCCACCTTGTTGGAGGCAGGGCTGTATGGCCAGTTTAAGAGCTAAGCTGTAGGAAAGGGATCACCGTTC
TM1	A1	Targeting	BTNL8_+_180325934.23-P1P2	TGCAAGTGTACAAATCCAGCCCACCTTGTTGGACGTCCAATCTGGCAGGCAGTTTAAGAGCTAAGCTGTAGGAAAGGGATCACCGTTC
TM1	A1	Targeting	BTNL8_+_180325981.23-P1P2	TGCAAGTGTACAAATCCAGCCCACCTTGTTGGTGCCCTGTGTGGGTGAAACGTTTAAGAGCTAAGCTGTAGGAAAGGGATCACCGTTC
TM1	A1	Targeting	BTNL8_+_180325990.23-P1P2	TGCAAGTGTACAAATCCAGCCCACCTTGTTGGGCAAAACGATGCCCTGTGTGTTTAAGAGCTAAGCTGTAGGAAAGGGATCACCGTTC
TM1	A1	Targeting	BTNL8_+_180326027.23-P1P2	TGCAAGTGTACAAATCCAGCCCACCTTGTTGGATAGTGTGGATAAGATTGGGTTTAAGAGCTAAGCTGTAGGAAAGGGATCACCGTTC
TM1	A1	Targeting	BTNL8_+_180326030.23-P1P2	TGCAAGTGTACAAATCCAGCCCACCTTGTTGGGAAATAGTGTGGATAAGATGTTTAAGAGCTAAGCTGTAGGAAAGGGATCACCGTTC
TM1	A1	Targeting	BTNL8_-_180325911.23-P1P2	TGCAAGTGTACAAATCCAGCCCACCTTGTTGGTGCTAACATGAGGTTTTTCGTTTAAGAGCTAAGCTGTAGGAAAGGGATCACCGTTC
TM1	A1	Targeting	BTNL8_-_180326016.23-P1P2	TGCAAGTGTACAAATCCAGCCCACCTTGTTGGACAGGGCATCGTTTTGCCCGTTTAAGAGCTAAGCTGTAGGAAAGGGATCACCGTTC
TM1	A1	Targeting	BTNL8_-_180326122.23-P1P2	TGCAAGTGTACAAATCCAGCCCACCTTGTTGGTCTAGAGTCCCTACACTTCGTTTAAGAGCTAAGCTGTAGGAAAGGGATCACCGTTC
TM1	A1	Targeting	BTNL9_+_180466852.23-P1	TGCAAGTGTACAAATCCAGCCCACCTTGTTGGTCAGTAAGGAACAAATCCTGTTTAAGAGCTAAGCTGTAGGAAAGGGATCACCGTTC
TM1	A1	Targeting	BTNL9_+_180466865.23-P1	TGCAAGTGTACAAATCCAGCCCACCTTGTTGGCCTCAGGACAAGGTCAGTAGTTTAAGAGCTAAGCTGTAGGAAAGGGATCACCGTTC
TM1	A1	Targeting	BTNL9_+_180466921.23-P1	TGCAAGTGTACAAATCCAGCCCACCTTGTTGGCTAACTAACCACGAGGAAGGTTTAAGAGCTAAGCTGTAGGAAAGGGATCACCGTTC
TM1	A1	Targeting	BTNL9_+_180466991.23-P1	TGCAAGTGTACAAATCCAGCCCACCTTGTTGGTGAAGCTCGGACTCCAAGGGTTTAAGAGCTAAGCTGTAGGAAAGGGATCACCGTTC
TM1	A1	Targeting	BTNL9_+_180467026.23-P1	TGCAAGTGTACAAATCCAGCCCACCTTGTTGGAAACGCTCCAGCTGGGTTCGTTTAAGAGCTAAGCTGTAGGAAAGGGATCACCGTTC
TM1	A1	Targeting	BTNL9_+_180467032.23-P1	TGCAAGTGTACAAATCCAGCCCACCTTGTTGGAGGAGAAAACGCTCCAGCTGTTTAAGAGCTAAGCTGTAGGAAAGGGATCACCGTTC
TM1	A1	Targeting	BTNL9_+_180467107.23-P1	TGCAAGTGTACAAATCCAGCCCACCTTGTTGGTCTCCAGGGTCACAGAAGGGTTTAAGAGCTAAGCTGTAGGAAAGGGATCACCGTTC
TM1	A1	Targeting	BTNL9_+_180467110.23-P1	TGCAAGTGTACAAATCCAGCCCACCTTGTTGGATCTCTCCAGGGTCACAGAGTTTAAGAGCTAAGCTGTAGGAAAGGGATCACCGTTC
TM1	A1	Targeting	BTNL9_+_180467121.23-P1	TGCAAGTGTACAAATCCAGCCCACCTTGTTGGCCATGTAAAATATCTCTCCGTTTAAGAGCTAAGCTGTAGGAAAGGGATCACCGTTC
TM1	A1	Targeting	BTNL9_+_180479848.23-P2	TGCAAGTGTACAAATCCAGCCCACCTTGTTGGGGCTGGCGGCGGATGTCCGGTTTAAGAGCTAAGCTGTAGGAAAGGGATCACCGTTC
TM1	A1	Targeting	BTNL9_+_180479874.23-P2	TGCAAGTGTACAAATCCAGCCCACCTTGTTGGCGCAGGCGGGAGGGTCCCAGTTTAAGAGCTAAGCTGTAGGAAAGGGATCACCGTTC
TM1	A1	Targeting	BTNL9_+_180479977.23-P2	TGCAAGTGTACAAATCCAGCCCACCTTGTTGGCGCCGCGGGGCGTGCGGGAGTTTAAGAGCTAAGCTGTAGGAAAGGGATCACCGTTC
TM1	A1	Targeting	BTNL9_-_180467248.23-P1	TGCAAGTGTACAAATCCAGCCCACCTTGTTGGGCAAACGGCATATATCTTAGTTTAAGAGCTAAGCTGTAGGAAAGGGATCACCGTTC
TM1	A1	Targeting	BTNL9_-_180479692.23-P2	TGCAAGTGTACAAATCCAGCCCACCTTGTTGGTGCGGGCGGGTCCTCCCTGGTTTAAGAGCTAAGCTGTAGGAAAGGGATCACCGTTC
TM1	A1	Targeting	BTNL9_-_180479739.23-P2	TGCAAGTGTACAAATCCAGCCCACCTTGTTGGAGGCCGCGCGCACGTGGTTGTTTAAGAGCTAAGCTGTAGGAAAGGGATCACCGTTC
TM1	A1	Targeting	BTNL9_-_180479818.23-P2	TGCAAGTGTACAAATCCAGCCCACCTTGTTGGCAAGCGAGGAGACGACTTGGTTTAAGAGCTAAGCTGTAGGAAAGGGATCACCGTTC
TM1	A1	Targeting	BTNL9_-_180479902.23-P2	TGCAAGTGTACAAATCCAGCCCACCTTGTTGGACCCTCCCGCCTGCGGACGGTTTAAGAGCTAAGCTGTAGGAAAGGGATCACCGTTC
TM1	A1	Targeting	BTNL9_-_180479925.23-P2	TGCAAGTGTACAAATCCAGCCCACCTTGTTGGGCGAGGGCGGGAAGACGCGGTTTAAGAGCTAAGCTGTAGGAAAGGGATCACCGTTC
TM1	A1	Targeting	BTNL9_-_180479931.23-P2	TGCAAGTGTACAAATCCAGCCCACCTTGTTGGGCGGGAAGACGCGGGGCGAGTTTAAGAGCTAAGCTGTAGGAAAGGGATCACCGTTC
TM1	A1	Targeting	BTNL9_-_180479963.23-P2	TGCAAGTGTACAAATCCAGCCCACCTTGTTGGGCCGCAGAAGCCTCGAGCCGTTTAAGAGCTAAGCTGTAGGAAAGGGATCACCGTTC
TM1	A1	Targeting	C10orf35_+_71389559.23-P1P2	TGCAAGTGTACAAATCCAGCCCACCTTGTTGGACGGGGCAGAACCCTCTGTGTTTAAGAGCTAAGCTGTAGGAAAGGGATCACCGTTC
TM1	A1	Targeting	C10orf35_+_71389725.23-P1P2	TGCAAGTGTACAAATCCAGCCCACCTTGTTGGGAGGAAAAACCCAGGGGGTGTTTAAGAGCTAAGCTGTAGGAAAGGGATCACCGTTC
TM1	A1	Targeting	C10orf35_+_71389731.23-P1P2	TGCAAGTGTACAAATCCAGCCCACCTTGTTGGTCCACGGAGGAAAAACCCAGTTTAAGAGCTAAGCTGTAGGAAAGGGATCACCGTTC
TM1	A1	Targeting	C10orf35_+_71389794.23-P1P2	TGCAAGTGTACAAATCCAGCCCACCTTGTTGGAGAAGACACGTGGAAAAGAGTTTAAGAGCTAAGCTGTAGGAAAGGGATCACCGTTC
TM1	A1	Targeting	C10orf35_+_71389858.23-P1P2	TGCAAGTGTACAAATCCAGCCCACCTTGTTGGGGTCGGGGAGATGGGGCGTGTTTAAGAGCTAAGCTGTAGGAAAGGGATCACCGTTC
TM1	A1	Targeting	C10orf35_+_71389865.23-P1P2	TGCAAGTGTACAAATCCAGCCCACCTTGTTGGTGCTGGGGGTCGGGGAGATGTTTAAGAGCTAAGCTGTAGGAAAGGGATCACCGTTC
TM1	A1	Targeting	C10orf35_+_71389900.23-P1P2	TGCAAGTGTACAAATCCAGCCCACCTTGTTGGCACCTGCCCGGCCCAGGGTGTTTAAGAGCTAAGCTGTAGGAAAGGGATCACCGTTC
TM1	A1	Targeting	C10orf35_+_71389905.23-P1P2	TGCAAGTGTACAAATCCAGCCCACCTTGTTGGAATTGCACCTGCCCGGCCCGTTTAAGAGCTAAGCTGTAGGAAAGGGATCACCGTTC
TM1	A1	Targeting	C10orf35_+_71389927.23-P1P2	TGCAAGTGTACAAATCCAGCCCACCTTGTTGGGCCCTCTGTAGGCCGCCTGGTTTAAGAGCTAAGCTGTAGGAAAGGGATCACCGTTC
TM1	A1	Targeting	C10orf35_-_71389947.23-P1P2	TGCAAGTGTACAAATCCAGCCCACCTTGTTGGTCCTCAGGCGGCCTACAGAGTTTAAGAGCTAAGCTGTAGGAAAGGGATCACCGTTC
TM1	A1	Targeting	C10orf54_+_73533332.23-P1P2	TGCAAGTGTACAAATCCAGCCCACCTTGTTGGCGGGGGCGCTGCGCGAAGGGTTTAAGAGCTAAGCTGTAGGAAAGGGATCACCGTTC
TM1	A1	Targeting	C10orf54_+_73533348.23-P1P2	TGCAAGTGTACAAATCCAGCCCACCTTGTTGGCCCCCACACGGCCCCCCGGGTTTAAGAGCTAAGCTGTAGGAAAGGGATCACCGTTC
TM1	A1	Targeting	C10orf54_+_73533412.23-P1P2	TGCAAGTGTACAAATCCAGCCCACCTTGTTGGGGCTCCCCACCCACGGGGCGTTTAAGAGCTAAGCTGTAGGAAAGGGATCACCGTTC
TM1	A1	Targeting	C10orf54_+_73533443.23-P1P2	TGCAAGTGTACAAATCCAGCCCACCTTGTTGGCAAGTGGAGCTGACTCGCTGTTTAAGAGCTAAGCTGTAGGAAAGGGATCACCGTTC
TM1	A1	Targeting	C10orf54_-_73533367.23-P1P2	TGCAAGTGTACAAATCCAGCCCACCTTGTTGGCGCCCCCGGGGGGCCGTGTGTTTAAGAGCTAAGCTGTAGGAAAGGGATCACCGTTC
TM1	A1	Targeting	C10orf54_-_73533395.23-P1P2	TGCAAGTGTACAAATCCAGCCCACCTTGTTGGGCCTCTCCGAGGGCCGCGTGTTTAAGAGCTAAGCTGTAGGAAAGGGATCACCGTTC
TM1	A1	Targeting	C10orf54_-_73533415.23-P1P2	TGCAAGTGTACAAATCCAGCCCACCTTGTTGGGGAGGGGCTTCCCGGAGGCGTTTAAGAGCTAAGCTGTAGGAAAGGGATCACCGTTC
TM1	A1	Targeting	C10orf54_-_73533424.23-P1P2	TGCAAGTGTACAAATCCAGCCCACCTTGTTGGTCCCGGAGGCCGGCCCCGTGTTTAAGAGCTAAGCTGTAGGAAAGGGATCACCGTTC
TM1	A1	Targeting	C10orf54_-_73533428.23-P1P2	TGCAAGTGTACAAATCCAGCCCACCTTGTTGGGGAGGCCGGCCCCGTGGGTGTTTAAGAGCTAAGCTGTAGGAAAGGGATCACCGTTC
TM1	A1	Targeting	C10orf54_-_73533469.23-P1P2	TGCAAGTGTACAAATCCAGCCCACCTTGTTGGCGAGTCAGCTCCACTTGATGTTTAAGAGCTAAGCTGTAGGAAAGGGATCACCGTTC
TM1	A1	Targeting	C11orf24_+_68039500.23-P1P2	TGCAAGTGTACAAATCCAGCCCACCTTGTTGGCCGCAGCCGCTCTTCGCCCGTTTAAGAGCTAAGCTGTAGGAAAGGGATCACCGTTC
TM1	A1	Targeting	C11orf24_+_68039594.23-P1P2	TGCAAGTGTACAAATCCAGCCCACCTTGTTGGCGCAAGAAGTGGCCCGAGCGTTTAAGAGCTAAGCTGTAGGAAAGGGATCACCGTTC
TM1	A1	Targeting	C11orf24_+_68039604.23-P1P2	TGCAAGTGTACAAATCCAGCCCACCTTGTTGGTCTGGCAGCGCGCAAGAAGGTTTAAGAGCTAAGCTGTAGGAAAGGGATCACCGTTC
TM1	A1	Targeting	C11orf24_+_68039698.23-P1P2	TGCAAGTGTACAAATCCAGCCCACCTTGTTGGGCACCCCGGGACCCCAAGAGTTTAAGAGCTAAGCTGTAGGAAAGGGATCACCGTTC
TM1	A1	Targeting	C11orf24_-_68039540.23-P1P2	TGCAAGTGTACAAATCCAGCCCACCTTGTTGGCGGCGGGGCCTGTGGCGAAGTTTAAGAGCTAAGCTGTAGGAAAGGGATCACCGTTC
TM1	A1	Targeting	C11orf24_-_68039543.23-P1P2	TGCAAGTGTACAAATCCAGCCCACCTTGTTGGCGGGGCCTGTGGCGAACGGGTTTAAGAGCTAAGCTGTAGGAAAGGGATCACCGTTC
TM1	A1	Targeting	C11orf24_-_68039558.23-P1P2	TGCAAGTGTACAAATCCAGCCCACCTTGTTGGACGGAGGCGAGCCGGAAGTGTTTAAGAGCTAAGCTGTAGGAAAGGGATCACCGTTC
TM1	A1	Targeting	C11orf24_-_68039660.23-P1P2	TGCAAGTGTACAAATCCAGCCCACCTTGTTGGAGCAGGTCTGTGGCGGAAGGTTTAAGAGCTAAGCTGTAGGAAAGGGATCACCGTTC
TM1	A1	Targeting	C11orf24_-_68039890.23-P1P2	TGCAAGTGTACAAATCCAGCCCACCTTGTTGGTGGGGTGCCCGGTAGTTAAGTTTAAGAGCTAAGCTGTAGGAAAGGGATCACCGTTC
TM1	A1	Targeting	C11orf24_-_68039894.23-P1P2	TGCAAGTGTACAAATCCAGCCCACCTTGTTGGGTGCCCGGTAGTTAAGGGTGTTTAAGAGCTAAGCTGTAGGAAAGGGATCACCGTTC
TM1	A1	Targeting	C11orf80_+_66512048.23-P1P2	TGCAAGTGTACAAATCCAGCCCACCTTGTTGGCCCGCAGGTGGGAGGTTCGGTTTAAGAGCTAAGCTGTAGGAAAGGGATCACCGTTC
TM1	A1	Targeting	C11orf80_+_66512058.23-P1P2	TGCAAGTGTACAAATCCAGCCCACCTTGTTGGTGCCAGTGGGCCCGCAGGTGTTTAAGAGCTAAGCTGTAGGAAAGGGATCACCGTTC
TM1	A1	Targeting	C11orf80_+_66512070.23-P1P2	TGCAAGTGTACAAATCCAGCCCACCTTGTTGGGAGCGCCGCGGGTGCCAGTGTTTAAGAGCTAAGCTGTAGGAAAGGGATCACCGTTC
TM1	A1	Targeting	C11orf80_-_66512037.23-P1P2	TGCAAGTGTACAAATCCAGCCCACCTTGTTGGAGCCTTGGCCGCCTCTCGCGTTTAAGAGCTAAGCTGTAGGAAAGGGATCACCGTTC
TM1	A1	Targeting	C11orf80_-_66512086.23-P1P2	TGCAAGTGTACAAATCCAGCCCACCTTGTTGGGCGGGCCCACTGGCACCCGGTTTAAGAGCTAAGCTGTAGGAAAGGGATCACCGTTC
TM1	A1	Targeting	C11orf80_-_66512106.23-P1P2	TGCAAGTGTACAAATCCAGCCCACCTTGTTGGGGCGCTCAGAGGCTCTAGGGTTTAAGAGCTAAGCTGTAGGAAAGGGATCACCGTTC
TM1	A1	Targeting	C11orf80_-_66512113.23-P1P2	TGCAAGTGTACAAATCCAGCCCACCTTGTTGGAGAGGCTCTAGGTGGCTCCGTTTAAGAGCTAAGCTGTAGGAAAGGGATCACCGTTC
TM1	A1	Targeting	C11orf80_-_66512119.23-P1P2	TGCAAGTGTACAAATCCAGCCCACCTTGTTGGTCTAGGTGGCTCCCGGCGGGTTTAAGAGCTAAGCTGTAGGAAAGGGATCACCGTTC
TM1	A1	Targeting	C11orf80_-_66512126.23-P1P2	TGCAAGTGTACAAATCCAGCCCACCTTGTTGGGGCTCCCGGCGGCGGTTCGGTTTAAGAGCTAAGCTGTAGGAAAGGGATCACCGTTC
TM1	A1	Targeting	C11orf80_-_66512217.23-P1P2	TGCAAGTGTACAAATCCAGCCCACCTTGTTGGCGCGCGCGCGGGAAGGGATGTTTAAGAGCTAAGCTGTAGGAAAGGGATCACCGTTC
TM1	A1	Targeting	C11orf87_+_109292662.23-P1P2	TGCAAGTGTACAAATCCAGCCCACCTTGTTGGCTCCAGCCCAGGAACTAGGGTTTAAGAGCTAAGCTGTAGGAAAGGGATCACCGTTC
TM1	A1	Targeting	C11orf87_+_109292763.23-P1P2	TGCAAGTGTACAAATCCAGCCCACCTTGTTGGGGGCTCCAAGCCACCCCTCGTTTAAGAGCTAAGCTGTAGGAAAGGGATCACCGTTC
TM1	A1	Targeting	C11orf87_+_109292797.23-P1P2	TGCAAGTGTACAAATCCAGCCCACCTTGTTGGCAGAGAGGCCGGTGACGTCGTTTAAGAGCTAAGCTGTAGGAAAGGGATCACCGTTC
TM1	A1	Targeting	C11orf87_-_109292655.23-P1P2	TGCAAGTGTACAAATCCAGCCCACCTTGTTGGTGCTTGCAGGGTGGAGGTAGTTTAAGAGCTAAGCTGTAGGAAAGGGATCACCGTTC
TM1	A1	Targeting	C11orf87_-_109292688.23-P1P2	TGCAAGTGTACAAATCCAGCCCACCTTGTTGGTAGTTCCTGGGCTGGAGAAGTTTAAGAGCTAAGCTGTAGGAAAGGGATCACCGTTC
TM1	A1	Targeting	C11orf87_-_109292700.23-P1P2	TGCAAGTGTACAAATCCAGCCCACCTTGTTGGTGGAGAAGGGCAGGGAACTGTTTAAGAGCTAAGCTGTAGGAAAGGGATCACCGTTC
TM1	A1	Targeting	C11orf87_-_109292743.23-P1P2	TGCAAGTGTACAAATCCAGCCCACCTTGTTGGTATGCTAGGACAAGGTGTTGTTTAAGAGCTAAGCTGTAGGAAAGGGATCACCGTTC
TM1	A1	Targeting	C11orf87_-_109292752.23-P1P2	TGCAAGTGTACAAATCCAGCCCACCTTGTTGGACAAGGTGTTGGGGTACTAGTTTAAGAGCTAAGCTGTAGGAAAGGGATCACCGTTC
TM1	A1	Targeting	C11orf87_-_109292755.23-P1P2	TGCAAGTGTACAAATCCAGCCCACCTTGTTGGAGGTGTTGGGGTACTAGGGGTTTAAGAGCTAAGCTGTAGGAAAGGGATCACCGTTC
TM1	A1	Targeting	C11orf87_-_109292810.23-P1P2	TGCAAGTGTACAAATCCAGCCCACCTTGTTGGGGTGGCTGCCTGACGTCACGTTTAAGAGCTAAGCTGTAGGAAAGGGATCACCGTTC
TM1	A1	Targeting	C12orf76_+_110486328.23-P1P2	TGCAAGTGTACAAATCCAGCCCACCTTGTTGGGCAGGGCTTGCGACGGAAGGTTTAAGAGCTAAGCTGTAGGAAAGGGATCACCGTTC
TM1	A1	Targeting	C12orf76_+_110486358.23-P1P2	TGCAAGTGTACAAATCCAGCCCACCTTGTTGGCGACGCAGAGAGACCTGGGGTTTAAGAGCTAAGCTGTAGGAAAGGGATCACCGTTC
TM1	A1	Targeting	C12orf76_+_110486361.23-P1P2	TGCAAGTGTACAAATCCAGCCCACCTTGTTGGCAGCGACGCAGAGAGACCTGTTTAAGAGCTAAGCTGTAGGAAAGGGATCACCGTTC
TM1	A1	Targeting	C12orf76_+_110486383.23-P1P2	TGCAAGTGTACAAATCCAGCCCACCTTGTTGGACGCGCGCCCTAAGGGCGGGTTTAAGAGCTAAGCTGTAGGAAAGGGATCACCGTTC
TM1	A1	Targeting	C12orf76_+_110486386.23-P1P2	TGCAAGTGTACAAATCCAGCCCACCTTGTTGGATGACGCGCGCCCTAAGGGGTTTAAGAGCTAAGCTGTAGGAAAGGGATCACCGTTC
TM1	A1	Targeting	C12orf76_+_110486389.23-P1P2	TGCAAGTGTACAAATCCAGCCCACCTTGTTGGGCAATGACGCGCGCCCTAAGTTTAAGAGCTAAGCTGTAGGAAAGGGATCACCGTTC
TM1	A1	Targeting	C12orf76_+_110486410.23-P1P2	TGCAAGTGTACAAATCCAGCCCACCTTGTTGGCCAGGACGCACAGTTACCAGTTTAAGAGCTAAGCTGTAGGAAAGGGATCACCGTTC
TM1	A1	Targeting	C12orf76_+_110486494.23-P1P2	TGCAAGTGTACAAATCCAGCCCACCTTGTTGGTGAACGGAAAGTTGGTCCGGTTTAAGAGCTAAGCTGTAGGAAAGGGATCACCGTTC
TM1	A1	Targeting	C12orf76_-_110486396.23-P1P2	TGCAAGTGTACAAATCCAGCCCACCTTGTTGGCGTCGCTGCCACCGCCCTTGTTTAAGAGCTAAGCTGTAGGAAAGGGATCACCGTTC
TM1	A1	Targeting	C12orf76_-_110486415.23-P1P2	TGCAAGTGTACAAATCCAGCCCACCTTGTTGGAGGGCGCGCGTCATTGCCAGTTTAAGAGCTAAGCTGTAGGAAAGGGATCACCGTTC
TM1	A1	Targeting	C14orf37_+_58619001.23-ENST00000267485.7	TGCAAGTGTACAAATCCAGCCCACCTTGTTGGAGTGCCAGCAGAGCCAGGGGTTTAAGAGCTAAGCTGTAGGAAAGGGATCACCGTTC
TM1	A1	Targeting	C14orf37_+_58619028.23-ENST00000267485.7	TGCAAGTGTACAAATCCAGCCCACCTTGTTGGGGGGCGTGGGCGACGGCGTGTTTAAGAGCTAAGCTGTAGGAAAGGGATCACCGTTC
TM1	A1	Targeting	C14orf37_+_58619040.23-ENST00000267485.7	TGCAAGTGTACAAATCCAGCCCACCTTGTTGGAGTGGGCGCAGGGGGGCGTGTTTAAGAGCTAAGCTGTAGGAAAGGGATCACCGTTC
TM1	A1	Targeting	C14orf37_+_58619056.23-ENST00000267485.7	TGCAAGTGTACAAATCCAGCCCACCTTGTTGGAGAGCGGAGGCGGGGAAGTGTTTAAGAGCTAAGCTGTAGGAAAGGGATCACCGTTC
TM1	A1	Targeting	C14orf37_+_58619119.23-ENST00000267485.7	TGCAAGTGTACAAATCCAGCCCACCTTGTTGGCGGAGCACGGGATCTCCGAGTTTAAGAGCTAAGCTGTAGGAAAGGGATCACCGTTC
TM1	A1	Targeting	C14orf37_-_58618917.23-ENST00000267485.7	TGCAAGTGTACAAATCCAGCCCACCTTGTTGGGCGACTCCCTCCGCTGTCTGTTTAAGAGCTAAGCTGTAGGAAAGGGATCACCGTTC
TM1	A1	Targeting	C14orf37_-_58618978.23-ENST00000267485.7	TGCAAGTGTACAAATCCAGCCCACCTTGTTGGAAGGCCGCGGCTACGGCCGGTTTAAGAGCTAAGCTGTAGGAAAGGGATCACCGTTC
TM1	A1	Targeting	C14orf37_-_58618987.23-ENST00000267485.7	TGCAAGTGTACAAATCCAGCCCACCTTGTTGGGCTACGGCCGGGGATTGGGGTTTAAGAGCTAAGCTGTAGGAAAGGGATCACCGTTC
TM1	A1	Targeting	C14orf37_-_58618995.23-ENST00000267485.7	TGCAAGTGTACAAATCCAGCCCACCTTGTTGGCGGGGATTGGGCGGTGAGTGTTTAAGAGCTAAGCTGTAGGAAAGGGATCACCGTTC
TM1	A1	Targeting	C14orf37_-_58619009.23-ENST00000267485.7	TGCAAGTGTACAAATCCAGCCCACCTTGTTGGTGAGTAGGTGTGCCCGCCCGTTTAAGAGCTAAGCTGTAGGAAAGGGATCACCGTTC
TM1	A1	Targeting	C15orf32_+_93014520.23-P1P2	TGCAAGTGTACAAATCCAGCCCACCTTGTTGGAGGGCATAGGTGACCCCTGGTTTAAGAGCTAAGCTGTAGGAAAGGGATCACCGTTC
TM1	A1	Targeting	C15orf32_+_93014750.23-P1P2	TGCAAGTGTACAAATCCAGCCCACCTTGTTGGGAGTGGGTCAAATGGGGACGTTTAAGAGCTAAGCTGTAGGAAAGGGATCACCGTTC
TM1	A1	Targeting	C15orf32_+_93014766.23-P1P2	TGCAAGTGTACAAATCCAGCCCACCTTGTTGGGCTCATGAAATTCTCTGAGGTTTAAGAGCTAAGCTGTAGGAAAGGGATCACCGTTC
TM1	A1	Targeting	C15orf32_+_93014848.23-P1P2	TGCAAGTGTACAAATCCAGCCCACCTTGTTGGCATAAAGGTCTTTGGGGTGGTTTAAGAGCTAAGCTGTAGGAAAGGGATCACCGTTC
TM1	A1	Targeting	C15orf32_+_93014854.23-P1P2	TGCAAGTGTACAAATCCAGCCCACCTTGTTGGTGAGCTCATAAAGGTCTTTGTTTAAGAGCTAAGCTGTAGGAAAGGGATCACCGTTC
TM1	A1	Targeting	C15orf32_-_93014556.23-P1P2	TGCAAGTGTACAAATCCAGCCCACCTTGTTGGATGCCCTGGAAGGTGGAAGGTTTAAGAGCTAAGCTGTAGGAAAGGGATCACCGTTC
TM1	A1	Targeting	C15orf32_-_93014631.23-P1P2	TGCAAGTGTACAAATCCAGCCCACCTTGTTGGTGCAATGTGACCATATCCCGTTTAAGAGCTAAGCTGTAGGAAAGGGATCACCGTTC
TM1	A1	Targeting	C15orf32_-_93014802.23-P1P2	TGCAAGTGTACAAATCCAGCCCACCTTGTTGGCATGAGCCTTGCCTTACCCGTTTAAGAGCTAAGCTGTAGGAAAGGGATCACCGTTC
TM1	A1	Targeting	C15orf32_-_93014805.23-P1P2	TGCAAGTGTACAAATCCAGCCCACCTTGTTGGGAGCCTTGCCTTACCCAGGGTTTAAGAGCTAAGCTGTAGGAAAGGGATCACCGTTC
TM1	A1	Targeting	C15orf32_-_93014816.23-P1P2	TGCAAGTGTACAAATCCAGCCCACCTTGTTGGTACCCAGGAGGCTCTTTCCGTTTAAGAGCTAAGCTGTAGGAAAGGGATCACCGTTC
TM1	A1	Targeting	C15orf54_+_39542504.23-P1P2	TGCAAGTGTACAAATCCAGCCCACCTTGTTGGTCTGCCTAAGACACTTTTAGTTTAAGAGCTAAGCTGTAGGAAAGGGATCACCGTTC
TM1	A1	Targeting	C15orf54_+_39542539.23-P1P2	TGCAAGTGTACAAATCCAGCCCACCTTGTTGGAGTTCCTAATGTATACCTTGTTTAAGAGCTAAGCTGTAGGAAAGGGATCACCGTTC
TM1	A1	Targeting	C15orf54_+_39542619.23-P1P2	TGCAAGTGTACAAATCCAGCCCACCTTGTTGGGACTCAGACCTATTCTTTGGTTTAAGAGCTAAGCTGTAGGAAAGGGATCACCGTTC
TM1	A1	Targeting	C15orf54_+_39542671.23-P1P2	TGCAAGTGTACAAATCCAGCCCACCTTGTTGGGGTGAGTGTTTTGACAGAGGTTTAAGAGCTAAGCTGTAGGAAAGGGATCACCGTTC
TM1	A1	Targeting	C15orf54_+_39542733.23-P1P2	TGCAAGTGTACAAATCCAGCCCACCTTGTTGGACTATGAACAAAGTTGGTAGTTTAAGAGCTAAGCTGTAGGAAAGGGATCACCGTTC
TM1	A1	Targeting	C15orf54_+_39542738.23-P1P2	TGCAAGTGTACAAATCCAGCCCACCTTGTTGGGACTCACTATGAACAAAGTGTTTAAGAGCTAAGCTGTAGGAAAGGGATCACCGTTC
TM1	A1	Targeting	C15orf54_-_39542521.23-P1P2	TGCAAGTGTACAAATCCAGCCCACCTTGTTGGTCCTCCCTAAAAGTGTCTTGTTTAAGAGCTAAGCTGTAGGAAAGGGATCACCGTTC
TM1	A1	Targeting	C15orf54_-_39542545.23-P1P2	TGCAAGTGTACAAATCCAGCCCACCTTGTTGGGAGACATCCAGGAAACCCAGTTTAAGAGCTAAGCTGTAGGAAAGGGATCACCGTTC
TM1	A1	Targeting	C15orf54_-_39542556.23-P1P2	TGCAAGTGTACAAATCCAGCCCACCTTGTTGGGAAACCCAAGGTATACATTGTTTAAGAGCTAAGCTGTAGGAAAGGGATCACCGTTC
TM1	A1	Targeting	C15orf54_-_39542731.23-P1P2	TGCAAGTGTACAAATCCAGCCCACCTTGTTGGAATAATTTGCATAAGGACAGTTTAAGAGCTAAGCTGTAGGAAAGGGATCACCGTTC
TM1	A1	Targeting	C16orf54_+_29757396.23-P1P2	TGCAAGTGTACAAATCCAGCCCACCTTGTTGGCCCAGGGGCAGACGAGTTGGTTTAAGAGCTAAGCTGTAGGAAAGGGATCACCGTTC
TM1	A1	Targeting	C16orf54_+_29757410.23-P1P2	TGCAAGTGTACAAATCCAGCCCACCTTGTTGGGGAAACAAACACTCCCCAGGTTTAAGAGCTAAGCTGTAGGAAAGGGATCACCGTTC
TM1	A1	Targeting	C16orf54_+_29757549.23-P1P2	TGCAAGTGTACAAATCCAGCCCACCTTGTTGGCTTTTCGGTGAATGTTCTGGTTTAAGAGCTAAGCTGTAGGAAAGGGATCACCGTTC
TM1	A1	Targeting	C16orf54_-_29757361.23-P1P2	TGCAAGTGTACAAATCCAGCCCACCTTGTTGGGCCCGGCCTCGGATGAAGGGTTTAAGAGCTAAGCTGTAGGAAAGGGATCACCGTTC
TM1	A1	Targeting	C16orf54_-_29757366.23-P1P2	TGCAAGTGTACAAATCCAGCCCACCTTGTTGGGCCTCGGATGAAGGCGGAAGTTTAAGAGCTAAGCTGTAGGAAAGGGATCACCGTTC
TM1	A1	Targeting	C16orf54_-_29757386.23-P1P2	TGCAAGTGTACAAATCCAGCCCACCTTGTTGGGGAGGGCACCGCCTGTTGCGTTTAAGAGCTAAGCTGTAGGAAAGGGATCACCGTTC
TM1	A1	Targeting	C16orf54_-_29757462.23-P1P2	TGCAAGTGTACAAATCCAGCCCACCTTGTTGGCAAGGGGATGTGGTCACTGGTTTAAGAGCTAAGCTGTAGGAAAGGGATCACCGTTC
TM1	A1	Targeting	C16orf54_-_29757467.23-P1P2	TGCAAGTGTACAAATCCAGCCCACCTTGTTGGGGATGTGGTCACTGCGGTGGTTTAAGAGCTAAGCTGTAGGAAAGGGATCACCGTTC
TM1	A1	Targeting	C16orf54_-_29757481.23-P1P2	TGCAAGTGTACAAATCCAGCCCACCTTGTTGGCGGTGAGGAGGCTTTTCCTGTTTAAGAGCTAAGCTGTAGGAAAGGGATCACCGTTC
TM1	A1	Targeting	C16orf54_-_29757541.23-P1P2	TGCAAGTGTACAAATCCAGCCCACCTTGTTGGTTAGTGTCACCCCATAGCCGTTTAAGAGCTAAGCTGTAGGAAAGGGATCACCGTTC
TM1	A1	Targeting	C16orf62_+_19566618.23-P1P2	TGCAAGTGTACAAATCCAGCCCACCTTGTTGGGCGTCCTCTAGGGGCAGAAGTTTAAGAGCTAAGCTGTAGGAAAGGGATCACCGTTC
TM1	A1	Targeting	C16orf62_+_19566663.23-P1P2	TGCAAGTGTACAAATCCAGCCCACCTTGTTGGCGGGCGTCATGATGGTAAAGTTTAAGAGCTAAGCTGTAGGAAAGGGATCACCGTTC
TM1	A1	Targeting	C16orf62_+_19566763.23-P1P2	TGCAAGTGTACAAATCCAGCCCACCTTGTTGGTGCTTCGGAGGAGCAACGTGTTTAAGAGCTAAGCTGTAGGAAAGGGATCACCGTTC
TM1	A1	Targeting	C16orf62_+_19566774.23-P1P2	TGCAAGTGTACAAATCCAGCCCACCTTGTTGGCGCCGGCGCCATGCTTCGGGTTTAAGAGCTAAGCTGTAGGAAAGGGATCACCGTTC
TM1	A1	Targeting	C16orf62_+_19566777.23-P1P2	TGCAAGTGTACAAATCCAGCCCACCTTGTTGGTCCCGCCGGCGCCATGCTTGTTTAAGAGCTAAGCTGTAGGAAAGGGATCACCGTTC
TM1	A1	Targeting	C16orf62_+_19566807.23-P1P2	TGCAAGTGTACAAATCCAGCCCACCTTGTTGGCTCCCCGCTCCGGACAGCCGTTTAAGAGCTAAGCTGTAGGAAAGGGATCACCGTTC
TM1	A1	Targeting	C16orf62_+_19566866.23-P1P2	TGCAAGTGTACAAATCCAGCCCACCTTGTTGGGCGACGCTCCGCACAGCACGTTTAAGAGCTAAGCTGTAGGAAAGGGATCACCGTTC
TM1	A1	Targeting	C16orf62_+_19566930.23-P1P2	TGCAAGTGTACAAATCCAGCCCACCTTGTTGGGCAGCTGGCCGCCCCGCAGGTTTAAGAGCTAAGCTGTAGGAAAGGGATCACCGTTC
TM1	A1	Targeting	C16orf62_-_19566811.23-P1P2	TGCAAGTGTACAAATCCAGCCCACCTTGTTGGCCGGCGGGAGTTGTAACCCGTTTAAGAGCTAAGCTGTAGGAAAGGGATCACCGTTC
TM1	A1	Targeting	C16orf62_-_19567004.23-P1P2	TGCAAGTGTACAAATCCAGCCCACCTTGTTGGGGAGTGGCGGGGTAAGGATGTTTAAGAGCTAAGCTGTAGGAAAGGGATCACCGTTC
TM1	A1	Targeting	C16orf91_+_1470885.23-P1P2	TGCAAGTGTACAAATCCAGCCCACCTTGTTGGGCGCACTCCGGGCCTGCGAGTTTAAGAGCTAAGCTGTAGGAAAGGGATCACCGTTC
TM1	A1	Targeting	C16orf91_+_1470938.23-P1P2	TGCAAGTGTACAAATCCAGCCCACCTTGTTGGGGTGTCGGTCCTATTCGAAGTTTAAGAGCTAAGCTGTAGGAAAGGGATCACCGTTC
TM1	A1	Targeting	C16orf91_+_1470952.23-P1P2	TGCAAGTGTACAAATCCAGCCCACCTTGTTGGGGGCCAGGGACCGGGGTGTGTTTAAGAGCTAAGCTGTAGGAAAGGGATCACCGTTC
TM1	A1	Targeting	C16orf91_+_1470971.23-P1P2	TGCAAGTGTACAAATCCAGCCCACCTTGTTGGCGGCGCCCGCCTCTCTTCGGTTTAAGAGCTAAGCTGTAGGAAAGGGATCACCGTTC
TM1	A1	Targeting	C16orf91_+_1470990.23-P1P2	TGCAAGTGTACAAATCCAGCCCACCTTGTTGGAGGACAACGTCCGCCCCCGGTTTAAGAGCTAAGCTGTAGGAAAGGGATCACCGTTC
TM1	A1	Targeting	C16orf91_+_1471050.23-P1P2	TGCAAGTGTACAAATCCAGCCCACCTTGTTGGGCCCCGCGCACCTTCATGAGTTTAAGAGCTAAGCTGTAGGAAAGGGATCACCGTTC
TM1	A1	Targeting	C16orf91_-_1470868.23-P1P2	TGCAAGTGTACAAATCCAGCCCACCTTGTTGGGCGCAGCGGAAATGACGTTGTTTAAGAGCTAAGCTGTAGGAAAGGGATCACCGTTC
TM1	A1	Targeting	C16orf91_-_1470911.23-P1P2	TGCAAGTGTACAAATCCAGCCCACCTTGTTGGGCAGGCCCGGAGTGCGCGAGTTTAAGAGCTAAGCTGTAGGAAAGGGATCACCGTTC
TM1	A1	Targeting	C16orf91_-_1470983.23-P1P2	TGCAAGTGTACAAATCCAGCCCACCTTGTTGGGGTCCCTGGCCCCGAAGAGGTTTAAGAGCTAAGCTGTAGGAAAGGGATCACCGTTC
TM1	A1	Targeting	C16orf91_-_1471152.23-P1P2	TGCAAGTGTACAAATCCAGCCCACCTTGTTGGTCTCTGCCGGCTTCCCCGAGTTTAAGAGCTAAGCTGTAGGAAAGGGATCACCGTTC
TM1	A1	Targeting	C16orf92_+_30034313.23-P1P2	TGCAAGTGTACAAATCCAGCCCACCTTGTTGGTACCCCTTGGATCAACCACGTTTAAGAGCTAAGCTGTAGGAAAGGGATCACCGTTC
TM1	A1	Targeting	C16orf92_+_30034364.23-P1P2	TGCAAGTGTACAAATCCAGCCCACCTTGTTGGTGGACAACAGGCACAATTTGTTTAAGAGCTAAGCTGTAGGAAAGGGATCACCGTTC
TM1	A1	Targeting	C16orf92_+_30034435.23-P1P2	TGCAAGTGTACAAATCCAGCCCACCTTGTTGGCCAGCATTTACAAAGAGGAGTTTAAGAGCTAAGCTGTAGGAAAGGGATCACCGTTC
TM1	A1	Targeting	C16orf92_+_30034493.23-P1P2	TGCAAGTGTACAAATCCAGCCCACCTTGTTGGGGGACCAGTCTTCACCCCCGTTTAAGAGCTAAGCTGTAGGAAAGGGATCACCGTTC
TM1	A1	Targeting	C16orf92_+_30034568.23-P1P2	TGCAAGTGTACAAATCCAGCCCACCTTGTTGGGGGAGAAAGTGCTAGGAGCGTTTAAGAGCTAAGCTGTAGGAAAGGGATCACCGTTC
TM1	A1	Targeting	C16orf92_+_30034639.23-P1P2	TGCAAGTGTACAAATCCAGCCCACCTTGTTGGGACTCCTATCATGAGGTGGGTTTAAGAGCTAAGCTGTAGGAAAGGGATCACCGTTC
TM1	A1	Targeting	C16orf92_-_30034342.23-P1P2	TGCAAGTGTACAAATCCAGCCCACCTTGTTGGTGATCCAAGGGGTAACCGGGTTTAAGAGCTAAGCTGTAGGAAAGGGATCACCGTTC
TM1	A1	Targeting	C16orf92_-_30034500.23-P1P2	TGCAAGTGTACAAATCCAGCCCACCTTGTTGGTCATCAGCGACATTCCAGGGTTTAAGAGCTAAGCTGTAGGAAAGGGATCACCGTTC
TM1	A1	Targeting	C16orf92_-_30034552.23-P1P2	TGCAAGTGTACAAATCCAGCCCACCTTGTTGGTCCTCTTCTGATGAGAGTGGTTTAAGAGCTAAGCTGTAGGAAAGGGATCACCGTTC
TM1	A1	Targeting	C16orf92_-_30034666.23-P1P2	TGCAAGTGTACAAATCCAGCCCACCTTGTTGGCCTCATGATAGGAGTCATGGTTTAAGAGCTAAGCTGTAGGAAAGGGATCACCGTTC
TM1	A1	Targeting	C16orf97_+_52107909.23-ENST00000562818.1	TGCAAGTGTACAAATCCAGCCCACCTTGTTGGCTTTGCTGAGATTTTCACTGTTTAAGAGCTAAGCTGTAGGAAAGGGATCACCGTTC
TM1	A1	Targeting	C16orf97_+_52108004.23-ENST00000562818.1	TGCAAGTGTACAAATCCAGCCCACCTTGTTGGGCTACCTGTGGGTGACTTCGTTTAAGAGCTAAGCTGTAGGAAAGGGATCACCGTTC
TM1	A1	Targeting	C16orf97_+_52108014.23-ENST00000562818.1	TGCAAGTGTACAAATCCAGCCCACCTTGTTGGGTACCTTTCAGCTACCTGTGTTTAAGAGCTAAGCTGTAGGAAAGGGATCACCGTTC
TM1	A1	Targeting	C16orf97_+_52108054.23-ENST00000562818.1	TGCAAGTGTACAAATCCAGCCCACCTTGTTGGTGAGGCAGTATAGGAAAGAGTTTAAGAGCTAAGCTGTAGGAAAGGGATCACCGTTC
TM1	A1	Targeting	C16orf97_+_52108062.23-ENST00000562818.1	TGCAAGTGTACAAATCCAGCCCACCTTGTTGGATCATCGGTGAGGCAGTATGTTTAAGAGCTAAGCTGTAGGAAAGGGATCACCGTTC
TM1	A1	Targeting	C16orf97_+_52108071.23-ENST00000562818.1	TGCAAGTGTACAAATCCAGCCCACCTTGTTGGCCCTGGTGGATCATCGGTGGTTTAAGAGCTAAGCTGTAGGAAAGGGATCACCGTTC
TM1	A1	Targeting	C16orf97_+_52108187.23-ENST00000562818.1	TGCAAGTGTACAAATCCAGCCCACCTTGTTGGATGTAGGGTAACTAATTGCGTTTAAGAGCTAAGCTGTAGGAAAGGGATCACCGTTC
TM1	A1	Targeting	C16orf97_+_52108201.23-ENST00000562818.1	TGCAAGTGTACAAATCCAGCCCACCTTGTTGGTTATCAGTGGCATTATGTAGTTTAAGAGCTAAGCTGTAGGAAAGGGATCACCGTTC
TM1	A1	Targeting	C16orf97_+_52108887.23-ENST00000566628.1	TGCAAGTGTACAAATCCAGCCCACCTTGTTGGGCCGCTCTCTCCTGCCATTGTTTAAGAGCTAAGCTGTAGGAAAGGGATCACCGTTC
TM1	A1	Targeting	C16orf97_+_52109055.23-ENST00000566628.1	TGCAAGTGTACAAATCCAGCCCACCTTGTTGGTAGTTTAGCTGTTCCAGAGGTTTAAGAGCTAAGCTGTAGGAAAGGGATCACCGTTC
TM1	A1	Targeting	C16orf97_+_52109108.23-ENST00000566628.1	TGCAAGTGTACAAATCCAGCCCACCTTGTTGGAAGTGTAGAAAATGCCTGCGTTTAAGAGCTAAGCTGTAGGAAAGGGATCACCGTTC
TM1	A1	Targeting	C16orf97_+_52109160.23-ENST00000566628.1	TGCAAGTGTACAAATCCAGCCCACCTTGTTGGCCTGGGAACTGAGACCAAAGTTTAAGAGCTAAGCTGTAGGAAAGGGATCACCGTTC
TM1	A1	Targeting	C16orf97_+_52109177.23-ENST00000566628.1	TGCAAGTGTACAAATCCAGCCCACCTTGTTGGTCATACTGTGAAAGGCCCCGTTTAAGAGCTAAGCTGTAGGAAAGGGATCACCGTTC
TM1	A1	Targeting	C16orf97_+_52109199.23-ENST00000566628.1	TGCAAGTGTACAAATCCAGCCCACCTTGTTGGTACACTCAGTGCAGCGAGAGTTTAAGAGCTAAGCTGTAGGAAAGGGATCACCGTTC
TM1	A1	Targeting	C16orf97_-_52107997.23-ENST00000562818.1	TGCAAGTGTACAAATCCAGCCCACCTTGTTGGTCGGATTCAAACGATGCCAGTTTAAGAGCTAAGCTGTAGGAAAGGGATCACCGTTC
TM1	A1	Targeting	C16orf97_-_52108091.23-ENST00000562818.1	TGCAAGTGTACAAATCCAGCCCACCTTGTTGGGCCTCACCGATGATCCACCGTTTAAGAGCTAAGCTGTAGGAAAGGGATCACCGTTC
TM1	A1	Targeting	C16orf97_-_52108915.23-ENST00000566628.1	TGCAAGTGTACAAATCCAGCCCACCTTGTTGGGCAGGAGAGAGCGGCATAAGTTTAAGAGCTAAGCTGTAGGAAAGGGATCACCGTTC
TM1	A1	Targeting	C16orf97_-_52109150.23-ENST00000566628.1	TGCAAGTGTACAAATCCAGCCCACCTTGTTGGTGGCTGGTGAACTTGAGATGTTTAAGAGCTAAGCTGTAGGAAAGGGATCACCGTTC
TM1	A1	Targeting	C16orf97_-_52109167.23-ENST00000566628.1	TGCAAGTGTACAAATCCAGCCCACCTTGTTGGATGGGAACAACGCTCCCTTGTTTAAGAGCTAAGCTGTAGGAAAGGGATCACCGTTC
TM1	A1	Targeting	C16orf97_-_52109399.23-ENST00000566628.1	TGCAAGTGTACAAATCCAGCCCACCTTGTTGGTAAACTCAGAAGTTGCAATGTTTAAGAGCTAAGCTGTAGGAAAGGGATCACCGTTC
TM1	A1	Targeting	C17orf74_+_7328660.23-P1P2	TGCAAGTGTACAAATCCAGCCCACCTTGTTGGAGGCTGACACGGTCGTCACGTTTAAGAGCTAAGCTGTAGGAAAGGGATCACCGTTC
TM1	A1	Targeting	C17orf74_+_7328670.23-P1P2	TGCAAGTGTACAAATCCAGCCCACCTTGTTGGGGGTAGTTAGAGGCTGACAGTTTAAGAGCTAAGCTGTAGGAAAGGGATCACCGTTC
TM1	A1	Targeting	C17orf74_+_7328679.23-P1P2	TGCAAGTGTACAAATCCAGCCCACCTTGTTGGCTGAAGATAGGGTAGTTAGGTTTAAGAGCTAAGCTGTAGGAAAGGGATCACCGTTC
TM1	A1	Targeting	C17orf74_+_7328689.23-P1P2	TGCAAGTGTACAAATCCAGCCCACCTTGTTGGGGTTCCTGAGCTGAAGATAGTTTAAGAGCTAAGCTGTAGGAAAGGGATCACCGTTC
TM1	A1	Targeting	C17orf74_+_7328850.23-P1P2	TGCAAGTGTACAAATCCAGCCCACCTTGTTGGAGCGAGAGTCACAATGTGGGTTTAAGAGCTAAGCTGTAGGAAAGGGATCACCGTTC
TM1	A1	Targeting	C17orf74_-_7328763.23-P1P2	TGCAAGTGTACAAATCCAGCCCACCTTGTTGGAGAGGAACAGACTGAGATCGTTTAAGAGCTAAGCTGTAGGAAAGGGATCACCGTTC
TM1	A1	Targeting	C17orf74_-_7328772.23-P1P2	TGCAAGTGTACAAATCCAGCCCACCTTGTTGGGACTGAGATCTGGGATATGGTTTAAGAGCTAAGCTGTAGGAAAGGGATCACCGTTC
TM1	A1	Targeting	C17orf74_-_7328794.23-P1P2	TGCAAGTGTACAAATCCAGCCCACCTTGTTGGGGACCAGGCTCCACCAAGTGTTTAAGAGCTAAGCTGTAGGAAAGGGATCACCGTTC
TM1	A1	Targeting	C17orf74_-_7328824.23-P1P2	TGCAAGTGTACAAATCCAGCCCACCTTGTTGGGTGGAGATGGCGGTAGAAGGTTTAAGAGCTAAGCTGTAGGAAAGGGATCACCGTTC
TM1	A1	Targeting	C17orf74_-_7328836.23-P1P2	TGCAAGTGTACAAATCCAGCCCACCTTGTTGGGTAGAAGGGGCCAGCAGAAGTTTAAGAGCTAAGCTGTAGGAAAGGGATCACCGTTC
TM1	A1	Targeting	C17orf78_+_35732749.23-P1P2	TGCAAGTGTACAAATCCAGCCCACCTTGTTGGACCTAGAGGTTTCTCGAGCGTTTAAGAGCTAAGCTGTAGGAAAGGGATCACCGTTC
TM1	A1	Targeting	C17orf78_+_35732762.23-P1P2	TGCAAGTGTACAAATCCAGCCCACCTTGTTGGAGAGAACTAGATTACCTAGGTTTAAGAGCTAAGCTGTAGGAAAGGGATCACCGTTC
TM1	A1	Targeting	C17orf78_+_35732793.23-P1P2	TGCAAGTGTACAAATCCAGCCCACCTTGTTGGCTTCTTCTGACTTCGCTGCGTTTAAGAGCTAAGCTGTAGGAAAGGGATCACCGTTC
TM1	A1	Targeting	C17orf78_+_35732853.23-P1P2	TGCAAGTGTACAAATCCAGCCCACCTTGTTGGACCCAGGAATAGATCTAATGTTTAAGAGCTAAGCTGTAGGAAAGGGATCACCGTTC
TM1	A1	Targeting	C17orf78_-_35732769.23-P1P2	TGCAAGTGTACAAATCCAGCCCACCTTGTTGGTCCTGCTCGAGAAACCTCTGTTTAAGAGCTAAGCTGTAGGAAAGGGATCACCGTTC
TM1	A1	Targeting	C17orf78_-_35732790.23-P1P2	TGCAAGTGTACAAATCCAGCCCACCTTGTTGGGTAATCTAGTTCTCTATGTGTTTAAGAGCTAAGCTGTAGGAAAGGGATCACCGTTC
TM1	A1	Targeting	C17orf78_-_35732796.23-P1P2	TGCAAGTGTACAAATCCAGCCCACCTTGTTGGTAGTTCTCTATGTCGGCACGTTTAAGAGCTAAGCTGTAGGAAAGGGATCACCGTTC
TM1	A1	Targeting	C17orf78_-_35732902.23-P1P2	TGCAAGTGTACAAATCCAGCCCACCTTGTTGGGAAATGGGGCAAAATAATCGTTTAAGAGCTAAGCTGTAGGAAAGGGATCACCGTTC
TM1	A1	Targeting	C17orf78_-_35732924.23-P1P2	TGCAAGTGTACAAATCCAGCCCACCTTGTTGGGTGGAATCAGAGTCTCTCAGTTTAAGAGCTAAGCTGTAGGAAAGGGATCACCGTTC
TM1	A1	Targeting	C17orf78_-_35732934.23-P1P2	TGCAAGTGTACAAATCCAGCCCACCTTGTTGGAGTCTCTCAGGGTCAAACTGTTTAAGAGCTAAGCTGTAGGAAAGGGATCACCGTTC
TM1	A1	Targeting	C17orf80_+_71228410.23-P1P2	TGCAAGTGTACAAATCCAGCCCACCTTGTTGGGAGCAGACGCCGGAAGTAGGTTTAAGAGCTAAGCTGTAGGAAAGGGATCACCGTTC
TM1	A1	Targeting	C17orf80_+_71228436.23-P1P2	TGCAAGTGTACAAATCCAGCCCACCTTGTTGGCGGCGGCAGCGACATGGGGGTTTAAGAGCTAAGCTGTAGGAAAGGGATCACCGTTC
TM1	A1	Targeting	C17orf80_+_71228440.23-P1P2	TGCAAGTGTACAAATCCAGCCCACCTTGTTGGACCACGGCGGCAGCGACATGTTTAAGAGCTAAGCTGTAGGAAAGGGATCACCGTTC
TM1	A1	Targeting	C17orf80_+_71228466.23-P1P2	TGCAAGTGTACAAATCCAGCCCACCTTGTTGGCCACTGCGCAGCCGCGAGAGTTTAAGAGCTAAGCTGTAGGAAAGGGATCACCGTTC
TM1	A1	Targeting	C17orf80_+_71228494.23-P1P2	TGCAAGTGTACAAATCCAGCCCACCTTGTTGGGTTACCAGTCGGTGCGGTTGTTTAAGAGCTAAGCTGTAGGAAAGGGATCACCGTTC
TM1	A1	Targeting	C17orf80_+_71228499.23-P1P2	TGCAAGTGTACAAATCCAGCCCACCTTGTTGGGCGGGGTTACCAGTCGGTGGTTTAAGAGCTAAGCTGTAGGAAAGGGATCACCGTTC
TM1	A1	Targeting	C17orf80_+_71228504.23-P1P2	TGCAAGTGTACAAATCCAGCCCACCTTGTTGGCGTGGGCGGGGTTACCAGTGTTTAAGAGCTAAGCTGTAGGAAAGGGATCACCGTTC
TM1	A1	Targeting	C17orf80_-_71228476.23-P1P2	TGCAAGTGTACAAATCCAGCCCACCTTGTTGGCCGTGGTACCGCCCTCTCGGTTTAAGAGCTAAGCTGTAGGAAAGGGATCACCGTTC
TM1	A1	Targeting	C17orf80_-_71228533.23-P1P2	TGCAAGTGTACAAATCCAGCCCACCTTGTTGGTAACCCCGCCCACGGGAAGGTTTAAGAGCTAAGCTGTAGGAAAGGGATCACCGTTC
TM1	A1	Targeting	C17orf80_-_71228542.23-P1P2	TGCAAGTGTACAAATCCAGCCCACCTTGTTGGCCACGGGAAGAGGCGGGCTGTTTAAGAGCTAAGCTGTAGGAAAGGGATCACCGTTC
TM1	A1	Targeting	C18orf32_+_47013631.23-P1P2	TGCAAGTGTACAAATCCAGCCCACCTTGTTGGGCGCCCATTGGCTCGGCTGGTTTAAGAGCTAAGCTGTAGGAAAGGGATCACCGTTC
TM1	A1	Targeting	C18orf32_+_47013718.23-P1P2	TGCAAGTGTACAAATCCAGCCCACCTTGTTGGAAGCCTCGCCGCGCCCCTTGTTTAAGAGCTAAGCTGTAGGAAAGGGATCACCGTTC
TM1	A1	Targeting	C18orf32_+_47013789.23-P1P2	TGCAAGTGTACAAATCCAGCCCACCTTGTTGGCGCAGCGAAGCTTTTAGTTGTTTAAGAGCTAAGCTGTAGGAAAGGGATCACCGTTC
TM1	A1	Targeting	C18orf32_-_47013620.23-P1P2	TGCAAGTGTACAAATCCAGCCCACCTTGTTGGACAATGTCCGCACTTCCGGGTTTAAGAGCTAAGCTGTAGGAAAGGGATCACCGTTC
TM1	A1	Targeting	C18orf32_-_47013663.23-P1P2	TGCAAGTGTACAAATCCAGCCCACCTTGTTGGCCAATGGGCGCCTTCAACGGTTTAAGAGCTAAGCTGTAGGAAAGGGATCACCGTTC
TM1	A1	Targeting	C18orf32_-_47013673.23-P1P2	TGCAAGTGTACAAATCCAGCCCACCTTGTTGGCCTTCAACGGGGACGACAAGTTTAAGAGCTAAGCTGTAGGAAAGGGATCACCGTTC
TM1	A1	Targeting	C18orf32_-_47013693.23-P1P2	TGCAAGTGTACAAATCCAGCCCACCTTGTTGGGGCGCGCTTGCGTCAACCCGTTTAAGAGCTAAGCTGTAGGAAAGGGATCACCGTTC
TM1	A1	Targeting	C18orf32_-_47013725.23-P1P2	TGCAAGTGTACAAATCCAGCCCACCTTGTTGGACGCAGCAGTGTTGCCCAAGTTTAAGAGCTAAGCTGTAGGAAAGGGATCACCGTTC
TM1	A1	Targeting	C18orf32_-_47013731.23-P1P2	TGCAAGTGTACAAATCCAGCCCACCTTGTTGGCAGTGTTGCCCAAGGGGCGGTTTAAGAGCTAAGCTGTAGGAAAGGGATCACCGTTC
TM1	A1	Targeting	C18orf32_-_47013751.23-P1P2	TGCAAGTGTACAAATCCAGCCCACCTTGTTGGGGCGAGGCTTCCGGCTCTGGTTTAAGAGCTAAGCTGTAGGAAAGGGATCACCGTTC
TM1	A1	Targeting	C19orf18_+_58485933.23-P1P2	TGCAAGTGTACAAATCCAGCCCACCTTGTTGGAGGACTGACCTCACACTGGGTTTAAGAGCTAAGCTGTAGGAAAGGGATCACCGTTC
TM1	A1	Targeting	C19orf18_+_58485936.23-P1P2	TGCAAGTGTACAAATCCAGCCCACCTTGTTGGGCAAGGACTGACCTCACACGTTTAAGAGCTAAGCTGTAGGAAAGGGATCACCGTTC
TM1	A1	Targeting	C19orf18_+_58485973.23-P1P2	TGCAAGTGTACAAATCCAGCCCACCTTGTTGGGGTCAGCATGGTTCCATGAGTTTAAGAGCTAAGCTGTAGGAAAGGGATCACCGTTC
TM1	A1	Targeting	C19orf18_+_58485993.23-P1P2	TGCAAGTGTACAAATCCAGCCCACCTTGTTGGTACACTGTAGTCTCCCCATGTTTAAGAGCTAAGCTGTAGGAAAGGGATCACCGTTC
TM1	A1	Targeting	C19orf18_+_58486112.23-P1P2	TGCAAGTGTACAAATCCAGCCCACCTTGTTGGGGGGAACTATGCATGCGGAGTTTAAGAGCTAAGCTGTAGGAAAGGGATCACCGTTC
TM1	A1	Targeting	C19orf18_+_58486130.23-P1P2	TGCAAGTGTACAAATCCAGCCCACCTTGTTGGTTGTTGGAAATCACGGATGGTTTAAGAGCTAAGCTGTAGGAAAGGGATCACCGTTC
TM1	A1	Targeting	C19orf18_-_58486020.23-P1P2	TGCAAGTGTACAAATCCAGCCCACCTTGTTGGGGGAGACTACAGTGTAAGAGTTTAAGAGCTAAGCTGTAGGAAAGGGATCACCGTTC
TM1	A1	Targeting	C19orf18_-_58486054.23-P1P2	TGCAAGTGTACAAATCCAGCCCACCTTGTTGGGTGCAGGCATGATGAGACCGTTTAAGAGCTAAGCTGTAGGAAAGGGATCACCGTTC
TM1	A1	Targeting	C19orf18_-_58486084.23-P1P2	TGCAAGTGTACAAATCCAGCCCACCTTGTTGGTGCAGTGTGCAGATTAGTGGTTTAAGAGCTAAGCTGTAGGAAAGGGATCACCGTTC
TM1	A1	Targeting	C19orf18_-_58486087.23-P1P2	TGCAAGTGTACAAATCCAGCCCACCTTGTTGGAGTGTGCAGATTAGTGAGGGTTTAAGAGCTAAGCTGTAGGAAAGGGATCACCGTTC
TM1	A1	Targeting	C19orf24_+_1275315.23-P1P2	TGCAAGTGTACAAATCCAGCCCACCTTGTTGGAGCCCGCCCGTGGGAGTCCGTTTAAGAGCTAAGCTGTAGGAAAGGGATCACCGTTC
TM1	A1	Targeting	C19orf24_+_1275323.23-P1P2	TGCAAGTGTACAAATCCAGCCCACCTTGTTGGAGGCCCGGAGCCCGCCCGTGTTTAAGAGCTAAGCTGTAGGAAAGGGATCACCGTTC
TM1	A1	Targeting	C19orf24_+_1275342.23-P1P2	TGCAAGTGTACAAATCCAGCCCACCTTGTTGGCTCCAAGGGATCAGGACGGGTTTAAGAGCTAAGCTGTAGGAAAGGGATCACCGTTC
TM1	A1	Targeting	C19orf24_+_1275443.23-P1P2	TGCAAGTGTACAAATCCAGCCCACCTTGTTGGCGGAGGCGGAGCTTGACGCGTTTAAGAGCTAAGCTGTAGGAAAGGGATCACCGTTC
TM1	A1	Targeting	C19orf24_+_1275495.23-P1P2	TGCAAGTGTACAAATCCAGCCCACCTTGTTGGCCTATGCGCGCTGTCAGTCGTTTAAGAGCTAAGCTGTAGGAAAGGGATCACCGTTC
TM1	A1	Targeting	C19orf24_+_1275526.23-P1P2	TGCAAGTGTACAAATCCAGCCCACCTTGTTGGGGCCCGGCGGAAGCGGTGGGTTTAAGAGCTAAGCTGTAGGAAAGGGATCACCGTTC
TM1	A1	Targeting	C19orf24_-_1275391.23-P1P2	TGCAAGTGTACAAATCCAGCCCACCTTGTTGGGACGAAGCAAGTTCCGCGGGTTTAAGAGCTAAGCTGTAGGAAAGGGATCACCGTTC
TM1	A1	Targeting	C19orf24_-_1275420.23-P1P2	TGCAAGTGTACAAATCCAGCCCACCTTGTTGGGGGCACTGTGGGTAGCGCCGTTTAAGAGCTAAGCTGTAGGAAAGGGATCACCGTTC
TM1	A1	Targeting	C19orf24_-_1275436.23-P1P2	TGCAAGTGTACAAATCCAGCCCACCTTGTTGGGCCGGGGCTCACCAGGCGGGTTTAAGAGCTAAGCTGTAGGAAAGGGATCACCGTTC
TM1	A1	Targeting	C19orf24_-_1275522.23-P1P2	TGCAAGTGTACAAATCCAGCCCACCTTGTTGGTGACAGCGCGCATAGGGGCGTTTAAGAGCTAAGCTGTAGGAAAGGGATCACCGTTC
TM1	A1	Targeting	C19orf26_+_1237920.23-P1P2	TGCAAGTGTACAAATCCAGCCCACCTTGTTGGAGCGGGCGCGCCGCCAACGGTTTAAGAGCTAAGCTGTAGGAAAGGGATCACCGTTC
TM1	A1	Targeting	C19orf26_+_1238030.23-P1P2	TGCAAGTGTACAAATCCAGCCCACCTTGTTGGCGCCCCGCCGGAAGGGAAGGTTTAAGAGCTAAGCTGTAGGAAAGGGATCACCGTTC
TM1	A1	Targeting	C19orf26_+_1238036.23-P1P2	TGCAAGTGTACAAATCCAGCCCACCTTGTTGGGCCCCCCGCCCCGCCGGAAGTTTAAGAGCTAAGCTGTAGGAAAGGGATCACCGTTC
TM1	A1	Targeting	C19orf26_+_1238138.23-P1P2	TGCAAGTGTACAAATCCAGCCCACCTTGTTGGCGAGGTGAATCGTGCCGATGTTTAAGAGCTAAGCTGTAGGAAAGGGATCACCGTTC
TM1	A1	Targeting	C19orf26_+_1238161.23-P1P2	TGCAAGTGTACAAATCCAGCCCACCTTGTTGGGTCCCTGGGACCTCAGGACGTTTAAGAGCTAAGCTGTAGGAAAGGGATCACCGTTC
TM1	A1	Targeting	C19orf26_+_1238255.23-P1P2	TGCAAGTGTACAAATCCAGCCCACCTTGTTGGAGGGGAGTCCGTGCCCCCCGTTTAAGAGCTAAGCTGTAGGAAAGGGATCACCGTTC
TM1	A1	Targeting	C19orf26_-_1237928.23-P1P2	TGCAAGTGTACAAATCCAGCCCACCTTGTTGGGCCGCGCACGTGACCGCGTGTTTAAGAGCTAAGCTGTAGGAAAGGGATCACCGTTC
TM1	A1	Targeting	C19orf26_-_1238120.23-P1P2	TGCAAGTGTACAAATCCAGCCCACCTTGTTGGCCCCCCGCACCCGCCGCGGGTTTAAGAGCTAAGCTGTAGGAAAGGGATCACCGTTC
TM1	A1	Targeting	C19orf26_-_1238164.23-P1P2	TGCAAGTGTACAAATCCAGCCCACCTTGTTGGCGGCACGATTCACCTCGCCGTTTAAGAGCTAAGCTGTAGGAAAGGGATCACCGTTC
TM1	A1	Targeting	C19orf26_-_1238172.23-P1P2	TGCAAGTGTACAAATCCAGCCCACCTTGTTGGTTCACCTCGCCCGGTCCTGGTTTAAGAGCTAAGCTGTAGGAAAGGGATCACCGTTC
TM1	A1	Targeting	C19orf38_+_10958543.23-P1P2	TGCAAGTGTACAAATCCAGCCCACCTTGTTGGAACTCCTGGGAATGAGACAGTTTAAGAGCTAAGCTGTAGGAAAGGGATCACCGTTC
TM1	A1	Targeting	C19orf38_+_10958933.23-P1P2	TGCAAGTGTACAAATCCAGCCCACCTTGTTGGTGCGGTTCTGCAGATTAGAGTTTAAGAGCTAAGCTGTAGGAAAGGGATCACCGTTC
TM1	A1	Targeting	C19orf38_+_10958956.23-P1P2	TGCAAGTGTACAAATCCAGCCCACCTTGTTGGTCAGACCCGCGCACCTCTCGTTTAAGAGCTAAGCTGTAGGAAAGGGATCACCGTTC
TM1	A1	Targeting	C19orf38_+_10959097.23-P1P2	TGCAAGTGTACAAATCCAGCCCACCTTGTTGGCTCCTGTGAGGCCAGATCGGTTTAAGAGCTAAGCTGTAGGAAAGGGATCACCGTTC
TM1	A1	Targeting	C19orf38_+_10959108.23-P1P2	TGCAAGTGTACAAATCCAGCCCACCTTGTTGGCCCGCCAACTCCTCCTGTGGTTTAAGAGCTAAGCTGTAGGAAAGGGATCACCGTTC
TM1	A1	Targeting	C19orf38_-_10958964.23-P1P2	TGCAAGTGTACAAATCCAGCCCACCTTGTTGGTGCAGAACCGCAACCAGAGGTTTAAGAGCTAAGCTGTAGGAAAGGGATCACCGTTC
TM1	A1	Targeting	C19orf38_-_10958972.23-P1P2	TGCAAGTGTACAAATCCAGCCCACCTTGTTGGCGCAACCAGAGAGGTGCGCGTTTAAGAGCTAAGCTGTAGGAAAGGGATCACCGTTC
TM1	A1	Targeting	C19orf38_-_10958990.23-P1P2	TGCAAGTGTACAAATCCAGCCCACCTTGTTGGCGGGTCTGATGTGTGTTTGGTTTAAGAGCTAAGCTGTAGGAAAGGGATCACCGTTC
TM1	A1	Targeting	C19orf38_-_10959116.23-P1P2	TGCAAGTGTACAAATCCAGCCCACCTTGTTGGTTCCCCGATCTGGCCTCACGTTTAAGAGCTAAGCTGTAGGAAAGGGATCACCGTTC
TM1	A1	Targeting	C19orf38_-_10959125.23-P1P2	TGCAAGTGTACAAATCCAGCCCACCTTGTTGGCTGGCCTCACAGGAGGAGTGTTTAAGAGCTAAGCTGTAGGAAAGGGATCACCGTTC
TM1	A1	Targeting	C1orf159_+_1051592.23-P1P2	TGCAAGTGTACAAATCCAGCCCACCTTGTTGGTGGTACCACCAGGCGAGGGGTTTAAGAGCTAAGCTGTAGGAAAGGGATCACCGTTC
TM1	A1	Targeting	C1orf159_+_1051595.23-P1P2	TGCAAGTGTACAAATCCAGCCCACCTTGTTGGCGATGGTACCACCAGGCGAGTTTAAGAGCTAAGCTGTAGGAAAGGGATCACCGTTC
TM1	A1	Targeting	C1orf159_+_1051674.23-P1P2	TGCAAGTGTACAAATCCAGCCCACCTTGTTGGGACATGCGCTGGTTCTTCTGTTTAAGAGCTAAGCTGTAGGAAAGGGATCACCGTTC
TM1	A1	Targeting	C1orf159_+_1051684.23-P1P2	TGCAAGTGTACAAATCCAGCCCACCTTGTTGGAGGGACCCGAGACATGCGCGTTTAAGAGCTAAGCTGTAGGAAAGGGATCACCGTTC
TM1	A1	Targeting	C1orf159_+_1051725.23-P1P2	TGCAAGTGTACAAATCCAGCCCACCTTGTTGGCGGCGCGCGAGGAATCCGGGTTTAAGAGCTAAGCTGTAGGAAAGGGATCACCGTTC
TM1	A1	Targeting	C1orf159_+_1051728.23-P1P2	TGCAAGTGTACAAATCCAGCCCACCTTGTTGGAGCCGGCGCGCGAGGAATCGTTTAAGAGCTAAGCTGTAGGAAAGGGATCACCGTTC
TM1	A1	Targeting	C1orf159_-_1051634.23-P1P2	TGCAAGTGTACAAATCCAGCCCACCTTGTTGGATCGCGCGCGGCCGTGGGTGTTTAAGAGCTAAGCTGTAGGAAAGGGATCACCGTTC
TM1	A1	Targeting	C1orf159_-_1051664.23-P1P2	TGCAAGTGTACAAATCCAGCCCACCTTGTTGGGCGGGGCGCGAAGCGCCCTGTTTAAGAGCTAAGCTGTAGGAAAGGGATCACCGTTC
TM1	A1	Targeting	C1orf159_-_1051700.23-P1P2	TGCAAGTGTACAAATCCAGCCCACCTTGTTGGAAGAACCAGCGCATGTCTCGTTTAAGAGCTAAGCTGTAGGAAAGGGATCACCGTTC
TM1	A1	Targeting	C1orf159_-_1051787.23-P1P2	TGCAAGTGTACAAATCCAGCCCACCTTGTTGGAGACGGGGCGGGGCGTCGTGTTTAAGAGCTAAGCTGTAGGAAAGGGATCACCGTTC
TM1	A1	Targeting	C1orf162_+_112016072.23-P1P2	TGCAAGTGTACAAATCCAGCCCACCTTGTTGGGAACATAAGGAGGCAAGACGTTTAAGAGCTAAGCTGTAGGAAAGGGATCACCGTTC
TM1	A1	Targeting	C1orf162_+_112016084.23-P1P2	TGCAAGTGTACAAATCCAGCCCACCTTGTTGGACATGAATGACAGAACATAGTTTAAGAGCTAAGCTGTAGGAAAGGGATCACCGTTC
TM1	A1	Targeting	C1orf162_+_112016467.23-P1P2	TGCAAGTGTACAAATCCAGCCCACCTTGTTGGACGGTAGGCTTCCTCTTTGGTTTAAGAGCTAAGCTGTAGGAAAGGGATCACCGTTC
TM1	A1	Targeting	C1orf162_+_112016481.23-P1P2	TGCAAGTGTACAAATCCAGCCCACCTTGTTGGTCTTACTAAACTCAACGGTGTTTAAGAGCTAAGCTGTAGGAAAGGGATCACCGTTC
TM1	A1	Targeting	C1orf162_+_112016485.23-P1P2	TGCAAGTGTACAAATCCAGCCCACCTTGTTGGAAGATCTTACTAAACTCAAGTTTAAGAGCTAAGCTGTAGGAAAGGGATCACCGTTC
TM1	A1	Targeting	C1orf162_-_112016124.23-P1P2	TGCAAGTGTACAAATCCAGCCCACCTTGTTGGTGTGTCAGACACAAAGAAAGTTTAAGAGCTAAGCTGTAGGAAAGGGATCACCGTTC
TM1	A1	Targeting	C1orf162_-_112016163.23-P1P2	TGCAAGTGTACAAATCCAGCCCACCTTGTTGGAAAATCATAATGTTGGGCTGTTTAAGAGCTAAGCTGTAGGAAAGGGATCACCGTTC
TM1	A1	Targeting	C1orf162_-_112016477.23-P1P2	TGCAAGTGTACAAATCCAGCCCACCTTGTTGGCATAATGTTGACCTCAAAGGTTTAAGAGCTAAGCTGTAGGAAAGGGATCACCGTTC
TM1	A1	Targeting	C1orf162_-_112016529.23-P1P2	TGCAAGTGTACAAATCCAGCCCACCTTGTTGGGCTACACACAATGTGATGCGTTTAAGAGCTAAGCTGTAGGAAAGGGATCACCGTTC
TM1	A1	Targeting	C1orf162_-_112016587.23-P1P2	TGCAAGTGTACAAATCCAGCCCACCTTGTTGGTGAAACATAGAAGCCGTAAGTTTAAGAGCTAAGCTGTAGGAAAGGGATCACCGTTC
TM1	A1	Targeting	C1orf185_+_51567496.23-P1P2	TGCAAGTGTACAAATCCAGCCCACCTTGTTGGCCACTAAAGCACTACTTATGTTTAAGAGCTAAGCTGTAGGAAAGGGATCACCGTTC
TM1	A1	Targeting	C1orf185_+_51567778.23-P1P2	TGCAAGTGTACAAATCCAGCCCACCTTGTTGGATGATCCCTAGGGAAACCTGTTTAAGAGCTAAGCTGTAGGAAAGGGATCACCGTTC
TM1	A1	Targeting	C1orf185_+_51567787.23-P1P2	TGCAAGTGTACAAATCCAGCCCACCTTGTTGGGGGGTGGAGATGATCCCTAGTTTAAGAGCTAAGCTGTAGGAAAGGGATCACCGTTC
TM1	A1	Targeting	C1orf185_+_51567805.23-P1P2	TGCAAGTGTACAAATCCAGCCCACCTTGTTGGTCTCCCTTTGGGCTGACGGGTTTAAGAGCTAAGCTGTAGGAAAGGGATCACCGTTC
TM1	A1	Targeting	C1orf185_-_51567684.23-P1P2	TGCAAGTGTACAAATCCAGCCCACCTTGTTGGATAATGTATCATGTGTACTGTTTAAGAGCTAAGCTGTAGGAAAGGGATCACCGTTC
TM1	A1	Targeting	C1orf185_-_51567689.23-P1P2	TGCAAGTGTACAAATCCAGCCCACCTTGTTGGGTATCATGTGTACTTGGAAGTTTAAGAGCTAAGCTGTAGGAAAGGGATCACCGTTC
TM1	A1	Targeting	C1orf185_-_51567712.23-P1P2	TGCAAGTGTACAAATCCAGCCCACCTTGTTGGTATGCATTTTGCTCTCGTTGTTTAAGAGCTAAGCTGTAGGAAAGGGATCACCGTTC
TM1	A1	Targeting	C1orf185_-_51567774.23-P1P2	TGCAAGTGTACAAATCCAGCCCACCTTGTTGGTGGTAGTAACATCAATACGGTTTAAGAGCTAAGCTGTAGGAAAGGGATCACCGTTC
TM1	A1	Targeting	C1orf185_-_51567783.23-P1P2	TGCAAGTGTACAAATCCAGCCCACCTTGTTGGCATCAATACGTGGCTTCCAGTTTAAGAGCTAAGCTGTAGGAAAGGGATCACCGTTC
TM1	A1	Targeting	C1orf185_-_51567823.23-P1P2	TGCAAGTGTACAAATCCAGCCCACCTTGTTGGCCACCCCCGTCAGCCCAAAGTTTAAGAGCTAAGCTGTAGGAAAGGGATCACCGTTC
TM1	A1	Targeting	C1orf186_+_206288264.23-P1P2	TGCAAGTGTACAAATCCAGCCCACCTTGTTGGGCATCCCTGAGGCGGACTCGTTTAAGAGCTAAGCTGTAGGAAAGGGATCACCGTTC
TM1	A1	Targeting	C1orf186_+_206288320.23-P1P2	TGCAAGTGTACAAATCCAGCCCACCTTGTTGGGGTAACTGATGGACAGCCGGTTTAAGAGCTAAGCTGTAGGAAAGGGATCACCGTTC
TM1	A1	Targeting	C1orf186_+_206288340.23-P1P2	TGCAAGTGTACAAATCCAGCCCACCTTGTTGGGTTCCCTGACCAGGAAACGGTTTAAGAGCTAAGCTGTAGGAAAGGGATCACCGTTC
TM1	A1	Targeting	C1orf186_+_206288475.23-P1P2	TGCAAGTGTACAAATCCAGCCCACCTTGTTGGGACGGAAATTGTGCATTCGGTTTAAGAGCTAAGCTGTAGGAAAGGGATCACCGTTC
TM1	A1	Targeting	C1orf186_-_206288263.23-P1P2	TGCAAGTGTACAAATCCAGCCCACCTTGTTGGTGGATCGCGTCACTCGGGCGTTTAAGAGCTAAGCTGTAGGAAAGGGATCACCGTTC
TM1	A1	Targeting	C1orf186_-_206288281.23-P1P2	TGCAAGTGTACAAATCCAGCCCACCTTGTTGGCTGGCCGGAGTCCGCCTCAGTTTAAGAGCTAAGCTGTAGGAAAGGGATCACCGTTC
TM1	A1	Targeting	C1orf186_-_206288295.23-P1P2	TGCAAGTGTACAAATCCAGCCCACCTTGTTGGCCTCAGGGATGCTCCACAGGTTTAAGAGCTAAGCTGTAGGAAAGGGATCACCGTTC
TM1	A1	Targeting	C1orf186_-_206288352.23-P1P2	TGCAAGTGTACAAATCCAGCCCACCTTGTTGGCATCAGTTACCTCGTTTCCGTTTAAGAGCTAAGCTGTAGGAAAGGGATCACCGTTC
TM1	A1	Targeting	C1orf186_-_206288357.23-P1P2	TGCAAGTGTACAAATCCAGCCCACCTTGTTGGGTTACCTCGTTTCCTGGTCGTTTAAGAGCTAAGCTGTAGGAAAGGGATCACCGTTC
TM1	A1	Targeting	C1orf186_-_206288577.23-P1P2	TGCAAGTGTACAAATCCAGCCCACCTTGTTGGAAGCAGGCGGTATGTGACAGTTTAAGAGCTAAGCTGTAGGAAAGGGATCACCGTTC
TM1	A1	Targeting	C1orf210_+_43751380.23-P1P2	TGCAAGTGTACAAATCCAGCCCACCTTGTTGGTAGAATTATCCCTCCCCACGTTTAAGAGCTAAGCTGTAGGAAAGGGATCACCGTTC
TM1	A1	Targeting	C1orf210_+_43751410.23-P1P2	TGCAAGTGTACAAATCCAGCCCACCTTGTTGGAAAGTTCTTGGCAAAAGCTGTTTAAGAGCTAAGCTGTAGGAAAGGGATCACCGTTC
TM1	A1	Targeting	C1orf210_+_43751456.23-P1P2	TGCAAGTGTACAAATCCAGCCCACCTTGTTGGGTACAAACCGCAAGCATTGGTTTAAGAGCTAAGCTGTAGGAAAGGGATCACCGTTC
TM1	A1	Targeting	C1orf210_+_43751759.23-P1P2	TGCAAGTGTACAAATCCAGCCCACCTTGTTGGGATCCTGAGATCCAGATGAGTTTAAGAGCTAAGCTGTAGGAAAGGGATCACCGTTC
TM1	A1	Targeting	C1orf210_-_43751300.23-P1P2	TGCAAGTGTACAAATCCAGCCCACCTTGTTGGTGGACAGGTGGGCGGGTCAGTTTAAGAGCTAAGCTGTAGGAAAGGGATCACCGTTC
TM1	A1	Targeting	C1orf210_-_43751388.23-P1P2	TGCAAGTGTACAAATCCAGCCCACCTTGTTGGTGCGGCAGCGCCTCCAGTGGTTTAAGAGCTAAGCTGTAGGAAAGGGATCACCGTTC
TM1	A1	Targeting	C1orf210_-_43751470.23-P1P2	TGCAAGTGTACAAATCCAGCCCACCTTGTTGGCCTCACCCCCCAATGCTTGGTTTAAGAGCTAAGCTGTAGGAAAGGGATCACCGTTC
TM1	A1	Targeting	C1orf210_-_43751517.23-P1P2	TGCAAGTGTACAAATCCAGCCCACCTTGTTGGCGTCCAGCGGGCCCTAGAGGTTTAAGAGCTAAGCTGTAGGAAAGGGATCACCGTTC
TM1	A1	Targeting	C1orf210_-_43751533.23-P1P2	TGCAAGTGTACAAATCCAGCCCACCTTGTTGGGAGGGGCAGACACCTCAGCGTTTAAGAGCTAAGCTGTAGGAAAGGGATCACCGTTC
TM1	A1	Targeting	C1orf210_-_43751751.23-P1P2	TGCAAGTGTACAAATCCAGCCCACCTTGTTGGGTGAGGGGTGGATCTGGATGTTTAAGAGCTAAGCTGTAGGAAAGGGATCACCGTTC
TM1	A1	Targeting	C1orf233_+_1535580.23-P1P2	TGCAAGTGTACAAATCCAGCCCACCTTGTTGGGCCCGGCGAGGGTTAAGGGGTTTAAGAGCTAAGCTGTAGGAAAGGGATCACCGTTC
TM1	A1	Targeting	C1orf233_+_1535583.23-P1P2	TGCAAGTGTACAAATCCAGCCCACCTTGTTGGGCGGCCCGGCGAGGGTTAAGTTTAAGAGCTAAGCTGTAGGAAAGGGATCACCGTTC
TM1	A1	Targeting	C1orf233_+_1535590.23-P1P2	TGCAAGTGTACAAATCCAGCCCACCTTGTTGGGTAGGCCGCGGCCCGGCGAGTTTAAGAGCTAAGCTGTAGGAAAGGGATCACCGTTC
TM1	A1	Targeting	C1orf233_+_1535601.23-P1P2	TGCAAGTGTACAAATCCAGCCCACCTTGTTGGCCCCCGCACCCGTAGGCCGGTTTAAGAGCTAAGCTGTAGGAAAGGGATCACCGTTC
TM1	A1	Targeting	C1orf233_+_1535750.23-P1P2	TGCAAGTGTACAAATCCAGCCCACCTTGTTGGGAAAAGCCGCAGGGGTCCAGTTTAAGAGCTAAGCTGTAGGAAAGGGATCACCGTTC
TM1	A1	Targeting	C1orf233_+_1535776.23-P1P2	TGCAAGTGTACAAATCCAGCCCACCTTGTTGGGGCCACAGCCCGTGAGTTTGTTTAAGAGCTAAGCTGTAGGAAAGGGATCACCGTTC
TM1	A1	Targeting	C1orf233_-_1535619.23-P1P2	TGCAAGTGTACAAATCCAGCCCACCTTGTTGGGGGCCGCGGCCTACGGGTGGTTTAAGAGCTAAGCTGTAGGAAAGGGATCACCGTTC
TM1	A1	Targeting	C1orf233_-_1535630.23-P1P2	TGCAAGTGTACAAATCCAGCCCACCTTGTTGGTACGGGTGCGGGGGATCGGGTTTAAGAGCTAAGCTGTAGGAAAGGGATCACCGTTC
TM1	A1	Targeting	C1orf233_-_1535677.23-P1P2	TGCAAGTGTACAAATCCAGCCCACCTTGTTGGAGGCGGCCGGAGTGCCGGTGTTTAAGAGCTAAGCTGTAGGAAAGGGATCACCGTTC
TM1	A1	Targeting	C1orf233_-_1535729.23-P1P2	TGCAAGTGTACAAATCCAGCCCACCTTGTTGGGGCAGGGCCGCCGCTCTCCGTTTAAGAGCTAAGCTGTAGGAAAGGGATCACCGTTC
TM1	A1	Targeting	C1orf43_+_154193118.23-P1P2	TGCAAGTGTACAAATCCAGCCCACCTTGTTGGTCTGAGCGCTCGACGCTCCGTTTAAGAGCTAAGCTGTAGGAAAGGGATCACCGTTC
TM1	A1	Targeting	C1orf43_-_154193104.23-P1P2	TGCAAGTGTACAAATCCAGCCCACCTTGTTGGTCCCCCTGACACGTGACTCGTTTAAGAGCTAAGCTGTAGGAAAGGGATCACCGTTC
TM1	A1	Targeting	C1orf43_-_154193144.23-P1P2	TGCAAGTGTACAAATCCAGCCCACCTTGTTGGAGCGTCGAGCGCTCAGACGGTTTAAGAGCTAAGCTGTAGGAAAGGGATCACCGTTC
TM1	A1	Targeting	C1orf43_-_154193162.23-P1P2	TGCAAGTGTACAAATCCAGCCCACCTTGTTGGGCGGAACTACGACAGTAAGGTTTAAGAGCTAAGCTGTAGGAAAGGGATCACCGTTC
TM1	A1	Targeting	C1orf43_-_154193171.23-P1P2	TGCAAGTGTACAAATCCAGCCCACCTTGTTGGCGACAGTAAGAGGAAGCGGGTTTAAGAGCTAAGCTGTAGGAAAGGGATCACCGTTC
TM1	A1	Targeting	C1orf43_-_154193190.23-P1P2	TGCAAGTGTACAAATCCAGCCCACCTTGTTGGCGGCCATCCGTGCGTCACGGTTTAAGAGCTAAGCTGTAGGAAAGGGATCACCGTTC
TM1	A1	Targeting	C1orf43_-_154193201.23-P1P2	TGCAAGTGTACAAATCCAGCCCACCTTGTTGGGCGTCACGTGGTGGAGGCAGTTTAAGAGCTAAGCTGTAGGAAAGGGATCACCGTTC
TM1	A1	Targeting	C1orf43_-_154193219.23-P1P2	TGCAAGTGTACAAATCCAGCCCACCTTGTTGGAGGGCCGCCGTGAAGGAGGGTTTAAGAGCTAAGCTGTAGGAAAGGGATCACCGTTC
TM1	A1	Targeting	C1orf43_-_154193245.23-P1P2	TGCAAGTGTACAAATCCAGCCCACCTTGTTGGGACTCGCGGAGCCGGAAAGGTTTAAGAGCTAAGCTGTAGGAAAGGGATCACCGTTC
TM1	A1	Targeting	C1orf43_-_154193368.23-P1P2	TGCAAGTGTACAAATCCAGCCCACCTTGTTGGAGCGAGCGCGAGAGGGAAAGTTTAAGAGCTAAGCTGTAGGAAAGGGATCACCGTTC
TM1	A1	Targeting	C1orf85_+_156261315.23-P2	TGCAAGTGTACAAATCCAGCCCACCTTGTTGGTAGTCCAGGCGGCTCTCGGGTTTAAGAGCTAAGCTGTAGGAAAGGGATCACCGTTC
TM1	A1	Targeting	C1orf85_+_156261398.23-P2	TGCAAGTGTACAAATCCAGCCCACCTTGTTGGCCCCCTACTCCGAGGGCGAGTTTAAGAGCTAAGCTGTAGGAAAGGGATCACCGTTC
TM1	A1	Targeting	C1orf85_+_156261404.23-P2	TGCAAGTGTACAAATCCAGCCCACCTTGTTGGCCGCTACCCCCTACTCCGAGTTTAAGAGCTAAGCTGTAGGAAAGGGATCACCGTTC
TM1	A1	Targeting	C1orf85_+_156261481.23-P2	TGCAAGTGTACAAATCCAGCCCACCTTGTTGGTTCCACCCACCGCGGTCCTGTTTAAGAGCTAAGCTGTAGGAAAGGGATCACCGTTC
TM1	A1	Targeting	C1orf85_+_156265466.23-P1	TGCAAGTGTACAAATCCAGCCCACCTTGTTGGCGCGAGTCATGTGACCCTCGTTTAAGAGCTAAGCTGTAGGAAAGGGATCACCGTTC
TM1	A1	Targeting	C1orf85_+_156265499.23-P1	TGCAAGTGTACAAATCCAGCCCACCTTGTTGGTGGCGGCTCCGCCCTTGAAGTTTAAGAGCTAAGCTGTAGGAAAGGGATCACCGTTC
TM1	A1	Targeting	C1orf85_+_156265793.23-P1	TGCAAGTGTACAAATCCAGCCCACCTTGTTGGTACTGGAGTAGTTCCCTGTGTTTAAGAGCTAAGCTGTAGGAAAGGGATCACCGTTC
TM1	A1	Targeting	C1orf85_+_156265809.23-P1	TGCAAGTGTACAAATCCAGCCCACCTTGTTGGGGAACTTAAGGCAATGTACGTTTAAGAGCTAAGCTGTAGGAAAGGGATCACCGTTC
TM1	A1	Targeting	C1orf85_+_156265820.23-P1	TGCAAGTGTACAAATCCAGCCCACCTTGTTGGGGACAGGGTTGGGAACTTAGTTTAAGAGCTAAGCTGTAGGAAAGGGATCACCGTTC
TM1	A1	Targeting	C1orf85_+_156265829.23-P1	TGCAAGTGTACAAATCCAGCCCACCTTGTTGGTCCACAATGGGACAGGGTTGTTTAAGAGCTAAGCTGTAGGAAAGGGATCACCGTTC
TM1	A1	Targeting	C1orf85_-_156261370.23-P2	TGCAAGTGTACAAATCCAGCCCACCTTGTTGGCCGCTCGGCCTCCGACTACGTTTAAGAGCTAAGCTGTAGGAAAGGGATCACCGTTC
TM1	A1	Targeting	C1orf85_-_156261417.23-P2	TGCAAGTGTACAAATCCAGCCCACCTTGTTGGCGCCCTCGCCCTCGGAGTAGTTTAAGAGCTAAGCTGTAGGAAAGGGATCACCGTTC
TM1	A1	Targeting	C1orf85_-_156261431.23-P2	TGCAAGTGTACAAATCCAGCCCACCTTGTTGGGAGTAGGGGGTAGCGGCTTGTTTAAGAGCTAAGCTGTAGGAAAGGGATCACCGTTC
TM1	A1	Targeting	C1orf85_-_156261493.23-P2	TGCAAGTGTACAAATCCAGCCCACCTTGTTGGGCCCCCAGGCCTAGGACCGGTTTAAGAGCTAAGCTGTAGGAAAGGGATCACCGTTC
TM1	A1	Targeting	C1orf85_-_156261496.23-P2	TGCAAGTGTACAAATCCAGCCCACCTTGTTGGCCCAGGCCTAGGACCGCGGGTTTAAGAGCTAAGCTGTAGGAAAGGGATCACCGTTC
TM1	A1	Targeting	C1orf85_-_156261596.23-P2	TGCAAGTGTACAAATCCAGCCCACCTTGTTGGGGGCCCGAGACAGTCATAAGTTTAAGAGCTAAGCTGTAGGAAAGGGATCACCGTTC
TM1	A1	Targeting	C1orf85_-_156265509.23-P1	TGCAAGTGTACAAATCCAGCCCACCTTGTTGGTTCAGCTGATCCCTTTCAAGTTTAAGAGCTAAGCTGTAGGAAAGGGATCACCGTTC
TM1	A1	Targeting	C1orf85_-_156265512.23-P1	TGCAAGTGTACAAATCCAGCCCACCTTGTTGGAGCTGATCCCTTTCAAGGGGTTTAAGAGCTAAGCTGTAGGAAAGGGATCACCGTTC
TM1	A1	Targeting	C1orf85_-_156265605.23-P1	TGCAAGTGTACAAATCCAGCCCACCTTGTTGGTTGTATTCTATCTTAAAACGTTTAAGAGCTAAGCTGTAGGAAAGGGATCACCGTTC
TM1	A1	Targeting	C1orf85_-_156265731.23-P1	TGCAAGTGTACAAATCCAGCCCACCTTGTTGGCAAAAACACAGTATTCAAAGTTTAAGAGCTAAGCTGTAGGAAAGGGATCACCGTTC
TM1	A1	Targeting	C20orf26_+_20032940.23-P1P2	TGCAAGTGTACAAATCCAGCCCACCTTGTTGGAAGCAGCGGATTCCCAAAGGTTTAAGAGCTAAGCTGTAGGAAAGGGATCACCGTTC
TM1	A1	Targeting	C20orf26_+_20032979.23-P1P2	TGCAAGTGTACAAATCCAGCCCACCTTGTTGGTCGACTGCTGCAGACATGGGTTTAAGAGCTAAGCTGTAGGAAAGGGATCACCGTTC
TM1	A1	Targeting	C20orf26_+_20033001.23-P1P2	TGCAAGTGTACAAATCCAGCCCACCTTGTTGGGCCGGGGACAGGTGTCCAGGTTTAAGAGCTAAGCTGTAGGAAAGGGATCACCGTTC
TM1	A1	Targeting	C20orf26_+_20033011.23-P1P2	TGCAAGTGTACAAATCCAGCCCACCTTGTTGGTAGCGTCCGTGCCGGGGACGTTTAAGAGCTAAGCTGTAGGAAAGGGATCACCGTTC
TM1	A1	Targeting	C20orf26_+_20033121.23-P1P2	TGCAAGTGTACAAATCCAGCCCACCTTGTTGGGGCTCAAGCGAGAGGTCAAGTTTAAGAGCTAAGCTGTAGGAAAGGGATCACCGTTC
TM1	A1	Targeting	C20orf26_+_20033164.23-P1P2	TGCAAGTGTACAAATCCAGCCCACCTTGTTGGACGCGCAGCCTGGTCACCAGTTTAAGAGCTAAGCTGTAGGAAAGGGATCACCGTTC
TM1	A1	Targeting	C20orf26_-_20032878.23-P1P2	TGCAAGTGTACAAATCCAGCCCACCTTGTTGGCCCAACCCGGGCACCCTCAGTTTAAGAGCTAAGCTGTAGGAAAGGGATCACCGTTC
TM1	A1	Targeting	C20orf26_-_20033007.23-P1P2	TGCAAGTGTACAAATCCAGCCCACCTTGTTGGGTCTGCAGCAGTCGACCTCGTTTAAGAGCTAAGCTGTAGGAAAGGGATCACCGTTC
TM1	A1	Targeting	C20orf26_-_20033040.23-P1P2	TGCAAGTGTACAAATCCAGCCCACCTTGTTGGCGGCACGGACGCTAGAAATGTTTAAGAGCTAAGCTGTAGGAAAGGGATCACCGTTC
TM1	A1	Targeting	C20orf26_-_20033105.23-P1P2	TGCAAGTGTACAAATCCAGCCCACCTTGTTGGAGGATCTCGGAACCGGAAGGTTTAAGAGCTAAGCTGTAGGAAAGGGATCACCGTTC
TM1	A1	Targeting	C2CD2L_+_118972553.23-P2	TGCAAGTGTACAAATCCAGCCCACCTTGTTGGGTGCAGCGGGGCAGAACATGTTTAAGAGCTAAGCTGTAGGAAAGGGATCACCGTTC
TM1	A1	Targeting	C2CD2L_+_118972769.23-P2	TGCAAGTGTACAAATCCAGCCCACCTTGTTGGTTAGGGAAGTATCCGTTCTGTTTAAGAGCTAAGCTGTAGGAAAGGGATCACCGTTC
TM1	A1	Targeting	C2CD2L_+_118972835.23-P2	TGCAAGTGTACAAATCCAGCCCACCTTGTTGGGAGGCATTCATCTTGGAACGTTTAAGAGCTAAGCTGTAGGAAAGGGATCACCGTTC
TM1	A1	Targeting	C2CD2L_+_118972856.23-P2	TGCAAGTGTACAAATCCAGCCCACCTTGTTGGGTGTCAGACACGTGGTACAGTTTAAGAGCTAAGCTGTAGGAAAGGGATCACCGTTC
TM1	A1	Targeting	C2CD2L_+_118972863.23-P2	TGCAAGTGTACAAATCCAGCCCACCTTGTTGGGTGAGCGGTGTCAGACACGGTTTAAGAGCTAAGCTGTAGGAAAGGGATCACCGTTC
TM1	A1	Targeting	C2CD2L_+_118972894.23-P2	TGCAAGTGTACAAATCCAGCCCACCTTGTTGGGACGGAGCTAAAACTGACGGTTTAAGAGCTAAGCTGTAGGAAAGGGATCACCGTTC
TM1	A1	Targeting	C2CD2L_+_118972915.23-P2	TGCAAGTGTACAAATCCAGCCCACCTTGTTGGTAAGCTTGACCTATGGAGGGTTTAAGAGCTAAGCTGTAGGAAAGGGATCACCGTTC
TM1	A1	Targeting	C2CD2L_+_118977913.23-P1	TGCAAGTGTACAAATCCAGCCCACCTTGTTGGTTCCGGGGTTGAAAATAGGGTTTAAGAGCTAAGCTGTAGGAAAGGGATCACCGTTC
TM1	A1	Targeting	C2CD2L_+_118977916.23-P1	TGCAAGTGTACAAATCCAGCCCACCTTGTTGGAGGTTCCGGGGTTGAAAATGTTTAAGAGCTAAGCTGTAGGAAAGGGATCACCGTTC
TM1	A1	Targeting	C2CD2L_+_118977929.23-P1	TGCAAGTGTACAAATCCAGCCCACCTTGTTGGCAGCGAGCGGAGGAGGTTCGTTTAAGAGCTAAGCTGTAGGAAAGGGATCACCGTTC
TM1	A1	Targeting	C2CD2L_+_118977938.23-P1	TGCAAGTGTACAAATCCAGCCCACCTTGTTGGGAGGGCTAGCAGCGAGCGGGTTTAAGAGCTAAGCTGTAGGAAAGGGATCACCGTTC
TM1	A1	Targeting	C2CD2L_+_118977941.23-P1	TGCAAGTGTACAAATCCAGCCCACCTTGTTGGCGGGAGGGCTAGCAGCGAGGTTTAAGAGCTAAGCTGTAGGAAAGGGATCACCGTTC
TM1	A1	Targeting	C2CD2L_+_118977955.23-P1	TGCAAGTGTACAAATCCAGCCCACCTTGTTGGTCGCTGGAGGAGGGCGGGAGTTTAAGAGCTAAGCTGTAGGAAAGGGATCACCGTTC
TM1	A1	Targeting	C2CD2L_+_118977963.23-P1	TGCAAGTGTACAAATCCAGCCCACCTTGTTGGGCGCTCCCTCGCTGGAGGAGTTTAAGAGCTAAGCTGTAGGAAAGGGATCACCGTTC
TM1	A1	Targeting	C2CD2L_+_118978004.23-P1	TGCAAGTGTACAAATCCAGCCCACCTTGTTGGAAAGGAGCCGCACCCGCGCGTTTAAGAGCTAAGCTGTAGGAAAGGGATCACCGTTC
TM1	A1	Targeting	C2CD2L_-_118972549.23-P2	TGCAAGTGTACAAATCCAGCCCACCTTGTTGGACACCGGGGAACCTCTCTAGTTTAAGAGCTAAGCTGTAGGAAAGGGATCACCGTTC
TM1	A1	Targeting	C2CD2L_-_118972672.23-P2	TGCAAGTGTACAAATCCAGCCCACCTTGTTGGAATATGGGCATTAGAGGGTGTTTAAGAGCTAAGCTGTAGGAAAGGGATCACCGTTC
TM1	A1	Targeting	C2CD2L_-_118972941.23-P2	TGCAAGTGTACAAATCCAGCCCACCTTGTTGGTCCATAGGTCAAGCTTAAAGTTTAAGAGCTAAGCTGTAGGAAAGGGATCACCGTTC
TM1	A1	Targeting	C2CD2L_-_118977894.23-P1	TGCAAGTGTACAAATCCAGCCCACCTTGTTGGAGCACCGCGATTGCAAGATGTTTAAGAGCTAAGCTGTAGGAAAGGGATCACCGTTC
TM1	A1	Targeting	C2CD2L_-_118978033.23-P1	TGCAAGTGTACAAATCCAGCCCACCTTGTTGGGGTGCGGCTCCTTTAAGGGGTTTAAGAGCTAAGCTGTAGGAAAGGGATCACCGTTC
TM1	A1	Targeting	C2orf43_+_21022865.23-P1P2	TGCAAGTGTACAAATCCAGCCCACCTTGTTGGGTACTGTGACGTCACCTGAGTTTAAGAGCTAAGCTGTAGGAAAGGGATCACCGTTC
TM1	A1	Targeting	C2orf43_+_21022910.23-P1P2	TGCAAGTGTACAAATCCAGCCCACCTTGTTGGCCGCGCGCCAGGCTGACATGTTTAAGAGCTAAGCTGTAGGAAAGGGATCACCGTTC
TM1	A1	Targeting	C2orf43_+_21022969.23-P1P2	TGCAAGTGTACAAATCCAGCCCACCTTGTTGGTCTCTCTGATCTGGACCACGTTTAAGAGCTAAGCTGTAGGAAAGGGATCACCGTTC
TM1	A1	Targeting	C2orf43_+_21022977.23-P1P2	TGCAAGTGTACAAATCCAGCCCACCTTGTTGGCCAAGAGGTCTCTCTGATCGTTTAAGAGCTAAGCTGTAGGAAAGGGATCACCGTTC
TM1	A1	Targeting	C2orf43_+_21022991.23-P1P2	TGCAAGTGTACAAATCCAGCCCACCTTGTTGGAACCCCGACACCCTCCAAGGTTTAAGAGCTAAGCTGTAGGAAAGGGATCACCGTTC
TM1	A1	Targeting	C2orf43_+_21023061.23-P1P2	TGCAAGTGTACAAATCCAGCCCACCTTGTTGGAGAAGCCAGAAGCACATCAGTTTAAGAGCTAAGCTGTAGGAAAGGGATCACCGTTC
TM1	A1	Targeting	C2orf43_-_21022872.23-P1P2	TGCAAGTGTACAAATCCAGCCCACCTTGTTGGGACCGGAAGTGCCCCCCTCGTTTAAGAGCTAAGCTGTAGGAAAGGGATCACCGTTC
TM1	A1	Targeting	C2orf43_-_21022894.23-P1P2	TGCAAGTGTACAAATCCAGCCCACCTTGTTGGTGACGTCACAGTACCGCGCGTTTAAGAGCTAAGCTGTAGGAAAGGGATCACCGTTC
TM1	A1	Targeting	C2orf43_-_21022905.23-P1P2	TGCAAGTGTACAAATCCAGCCCACCTTGTTGGTACCGCGCCGGAGCTGATCGTTTAAGAGCTAAGCTGTAGGAAAGGGATCACCGTTC
TM1	A1	Targeting	C2orf43_-_21022961.23-P1P2	TGCAAGTGTACAAATCCAGCCCACCTTGTTGGTGGCTGGGAGATTTCTTACGTTTAAGAGCTAAGCTGTAGGAAAGGGATCACCGTTC
TM1	A1	Targeting	C2orf74_+_61371832.23-P1P2	TGCAAGTGTACAAATCCAGCCCACCTTGTTGGAATGCTAGGGGCGGGACGGGTTTAAGAGCTAAGCTGTAGGAAAGGGATCACCGTTC
TM1	A1	Targeting	C2orf74_+_61371942.23-P1P2	TGCAAGTGTACAAATCCAGCCCACCTTGTTGGGCCACAAGGGGTCTTCCTGGTTTAAGAGCTAAGCTGTAGGAAAGGGATCACCGTTC
TM1	A1	Targeting	C2orf74_+_61372085.23-P1P2	TGCAAGTGTACAAATCCAGCCCACCTTGTTGGCTCATAAACCTGCTCTCCTGTTTAAGAGCTAAGCTGTAGGAAAGGGATCACCGTTC
TM1	A1	Targeting	C2orf74_+_61372124.23-P1P2	TGCAAGTGTACAAATCCAGCCCACCTTGTTGGGCCCCATCGGCTTCCCTAAGTTTAAGAGCTAAGCTGTAGGAAAGGGATCACCGTTC
TM1	A1	Targeting	C2orf74_+_61372136.23-P1P2	TGCAAGTGTACAAATCCAGCCCACCTTGTTGGCCAAGGAGCCGCGCCCCATGTTTAAGAGCTAAGCTGTAGGAAAGGGATCACCGTTC
TM1	A1	Targeting	C2orf74_+_61372152.23-P1P2	TGCAAGTGTACAAATCCAGCCCACCTTGTTGGTTTGTGTGCGCATGCTCCAGTTTAAGAGCTAAGCTGTAGGAAAGGGATCACCGTTC
TM1	A1	Targeting	C2orf74_-_61372132.23-P1P2	TGCAAGTGTACAAATCCAGCCCACCTTGTTGGCGCAGCGGATTTTCCGTTAGTTTAAGAGCTAAGCTGTAGGAAAGGGATCACCGTTC
TM1	A1	Targeting	C2orf74_-_61372144.23-P1P2	TGCAAGTGTACAAATCCAGCCCACCTTGTTGGTCCGTTAGGGAAGCCGATGGTTTAAGAGCTAAGCTGTAGGAAAGGGATCACCGTTC
TM1	A1	Targeting	C2orf74_-_61372218.23-P1P2	TGCAAGTGTACAAATCCAGCCCACCTTGTTGGCATGCGCACACAGATGTTAGTTTAAGAGCTAAGCTGTAGGAAAGGGATCACCGTTC
TM1	A1	Targeting	C2orf74_-_61372224.23-P1P2	TGCAAGTGTACAAATCCAGCCCACCTTGTTGGCACACAGATGTTAGGGTTCGTTTAAGAGCTAAGCTGTAGGAAAGGGATCACCGTTC
TM1	A1	Targeting	C2orf82_+_233734633.23-P2	TGCAAGTGTACAAATCCAGCCCACCTTGTTGGTGGCCACTGTGTTTCAGTGGTTTAAGAGCTAAGCTGTAGGAAAGGGATCACCGTTC
TM1	A1	Targeting	C2orf82_+_233734732.23-P2	TGCAAGTGTACAAATCCAGCCCACCTTGTTGGCACCTCCCACATTTACTCCGTTTAAGAGCTAAGCTGTAGGAAAGGGATCACCGTTC
TM1	A1	Targeting	C2orf82_+_233734799.23-P2	TGCAAGTGTACAAATCCAGCCCACCTTGTTGGCGCTCTTGGAGAGGGAAAGGTTTAAGAGCTAAGCTGTAGGAAAGGGATCACCGTTC
TM1	A1	Targeting	C2orf82_+_233734806.23-P2	TGCAAGTGTACAAATCCAGCCCACCTTGTTGGGCAGCCCCGCTCTTGGAGAGTTTAAGAGCTAAGCTGTAGGAAAGGGATCACCGTTC
TM1	A1	Targeting	C2orf82_+_233734812.23-P2	TGCAAGTGTACAAATCCAGCCCACCTTGTTGGCTGGGAGCAGCCCCGCTCTGTTTAAGAGCTAAGCTGTAGGAAAGGGATCACCGTTC
TM1	A1	Targeting	C2orf82_+_233740156.23-P1	TGCAAGTGTACAAATCCAGCCCACCTTGTTGGACGCTGGAAAGCTCAACATGTTTAAGAGCTAAGCTGTAGGAAAGGGATCACCGTTC
TM1	A1	Targeting	C2orf82_+_233740189.23-P1	TGCAAGTGTACAAATCCAGCCCACCTTGTTGGCCATCCCCGGCAACCAGACGTTTAAGAGCTAAGCTGTAGGAAAGGGATCACCGTTC
TM1	A1	Targeting	C2orf82_+_233740305.23-P1	TGCAAGTGTACAAATCCAGCCCACCTTGTTGGTCAGTCCCACAGAAAGCACGTTTAAGAGCTAAGCTGTAGGAAAGGGATCACCGTTC
TM1	A1	Targeting	C2orf82_+_233740352.23-P1	TGCAAGTGTACAAATCCAGCCCACCTTGTTGGGCAGGATTTGGGGTACCCAGTTTAAGAGCTAAGCTGTAGGAAAGGGATCACCGTTC
TM1	A1	Targeting	C2orf82_+_233740362.23-P1	TGCAAGTGTACAAATCCAGCCCACCTTGTTGGTTGGGAGTTGGCAGGATTTGTTTAAGAGCTAAGCTGTAGGAAAGGGATCACCGTTC
TM1	A1	Targeting	C2orf82_+_233740417.23-P1	TGCAAGTGTACAAATCCAGCCCACCTTGTTGGTGTCTGTTCAGTGTAAGGGGTTTAAGAGCTAAGCTGTAGGAAAGGGATCACCGTTC
TM1	A1	Targeting	C2orf82_-_233734450.23-P2	TGCAAGTGTACAAATCCAGCCCACCTTGTTGGAAAGACTAGAGCTGCCTGAGTTTAAGAGCTAAGCTGTAGGAAAGGGATCACCGTTC
TM1	A1	Targeting	C2orf82_-_233734531.23-P2	TGCAAGTGTACAAATCCAGCCCACCTTGTTGGCCAGGCATGGAGAACCCAGGTTTAAGAGCTAAGCTGTAGGAAAGGGATCACCGTTC
TM1	A1	Targeting	C2orf82_-_233734748.23-P2	TGCAAGTGTACAAATCCAGCCCACCTTGTTGGGTGGTCCAGGAGTAAATGTGTTTAAGAGCTAAGCTGTAGGAAAGGGATCACCGTTC
TM1	A1	Targeting	C2orf82_-_233734848.23-P2	TGCAAGTGTACAAATCCAGCCCACCTTGTTGGCTCCCAGGTTCAGGAAAGCGTTTAAGAGCTAAGCTGTAGGAAAGGGATCACCGTTC
TM1	A1	Targeting	C2orf82_-_233734926.23-P2	TGCAAGTGTACAAATCCAGCCCACCTTGTTGGGGTGCGGGCACGATGTCCCGTTTAAGAGCTAAGCTGTAGGAAAGGGATCACCGTTC
TM1	A1	Targeting	C2orf82_-_233740225.23-P1	TGCAAGTGTACAAATCCAGCCCACCTTGTTGGGGGATGGATGGCCCAGGGTGTTTAAGAGCTAAGCTGTAGGAAAGGGATCACCGTTC
TM1	A1	Targeting	C2orf82_-_233740251.23-P1	TGCAAGTGTACAAATCCAGCCCACCTTGTTGGGTGGTCAGGGGAGGACAACGTTTAAGAGCTAAGCTGTAGGAAAGGGATCACCGTTC
TM1	A1	Targeting	C2orf82_-_233740256.23-P1	TGCAAGTGTACAAATCCAGCCCACCTTGTTGGCAGGGGAGGACAACTGGGGGTTTAAGAGCTAAGCTGTAGGAAAGGGATCACCGTTC
TM1	A1	Targeting	C2orf82_-_233740412.23-P1	TGCAAGTGTACAAATCCAGCCCACCTTGTTGGAGCAGAGAAGGGCTTTGTGGTTTAAGAGCTAAGCTGTAGGAAAGGGATCACCGTTC
TM1	A1	Targeting	C2orf83_+_228497931.23-P1P2	TGCAAGTGTACAAATCCAGCCCACCTTGTTGGAAACTGTCAATAGAAACCTGTTTAAGAGCTAAGCTGTAGGAAAGGGATCACCGTTC
TM1	A1	Targeting	C2orf83_+_228498027.23-P1P2	TGCAAGTGTACAAATCCAGCCCACCTTGTTGGCGTACTATATCCCATCCCAGTTTAAGAGCTAAGCTGTAGGAAAGGGATCACCGTTC
TM1	A1	Targeting	C2orf83_+_228498183.23-P1P2	TGCAAGTGTACAAATCCAGCCCACCTTGTTGGAGGCCTGAGCCACAGTGACGTTTAAGAGCTAAGCTGTAGGAAAGGGATCACCGTTC
TM1	A1	Targeting	C2orf83_-_228497917.23-P1P2	TGCAAGTGTACAAATCCAGCCCACCTTGTTGGTGTGTTCTTCTCAAGGCTTGTTTAAGAGCTAAGCTGTAGGAAAGGGATCACCGTTC
TM1	A1	Targeting	C2orf83_-_228497927.23-P1P2	TGCAAGTGTACAAATCCAGCCCACCTTGTTGGTCAAGGCTTTGGTCTGCTGGTTTAAGAGCTAAGCTGTAGGAAAGGGATCACCGTTC
TM1	A1	Targeting	C2orf83_-_228497936.23-P1P2	TGCAAGTGTACAAATCCAGCCCACCTTGTTGGTGGTCTGCTGAGGAAGCCCGTTTAAGAGCTAAGCTGTAGGAAAGGGATCACCGTTC
TM1	A1	Targeting	C2orf83_-_228498002.23-P1P2	TGCAAGTGTACAAATCCAGCCCACCTTGTTGGGACTGAAGAAATAGACAAAGTTTAAGAGCTAAGCTGTAGGAAAGGGATCACCGTTC
TM1	A1	Targeting	C2orf83_-_228498033.23-P1P2	TGCAAGTGTACAAATCCAGCCCACCTTGTTGGATGTATTTTAACATTCCGTGTTTAAGAGCTAAGCTGTAGGAAAGGGATCACCGTTC
TM1	A1	Targeting	C2orf83_-_228498037.23-P1P2	TGCAAGTGTACAAATCCAGCCCACCTTGTTGGATTTTAACATTCCGTGGGAGTTTAAGAGCTAAGCTGTAGGAAAGGGATCACCGTTC
TM1	A1	Targeting	C2orf83_-_228498195.23-P1P2	TGCAAGTGTACAAATCCAGCCCACCTTGTTGGTGTATCAGGCCGGTCACTGGTTTAAGAGCTAAGCTGTAGGAAAGGGATCACCGTTC
TM1	A1	Targeting	C3orf17_+_112738691.23-P1P2	TGCAAGTGTACAAATCCAGCCCACCTTGTTGGATTCTACGCGGCCACGTGTGTTTAAGAGCTAAGCTGTAGGAAAGGGATCACCGTTC
TM1	A1	Targeting	C3orf17_-_112738557.23-P1P2	TGCAAGTGTACAAATCCAGCCCACCTTGTTGGACGTCCAGCGACCGGAGGTGTTTAAGAGCTAAGCTGTAGGAAAGGGATCACCGTTC
TM1	A1	Targeting	C3orf17_-_112738581.23-P1P2	TGCAAGTGTACAAATCCAGCCCACCTTGTTGGGATGGGACCCAGTCCGGGCGTTTAAGAGCTAAGCTGTAGGAAAGGGATCACCGTTC
TM1	A1	Targeting	C3orf17_-_112738586.23-P1P2	TGCAAGTGTACAAATCCAGCCCACCTTGTTGGGACCCAGTCCGGGCCGGAAGTTTAAGAGCTAAGCTGTAGGAAAGGGATCACCGTTC
TM1	A1	Targeting	C3orf17_-_112738593.23-P1P2	TGCAAGTGTACAAATCCAGCCCACCTTGTTGGTCCGGGCCGGAAGGGAGCAGTTTAAGAGCTAAGCTGTAGGAAAGGGATCACCGTTC
TM1	A1	Targeting	C3orf17_-_112738661.23-P1P2	TGCAAGTGTACAAATCCAGCCCACCTTGTTGGTCGAGTAAACGCGTGGGACGTTTAAGAGCTAAGCTGTAGGAAAGGGATCACCGTTC
TM1	A1	Targeting	C3orf17_-_112738666.23-P1P2	TGCAAGTGTACAAATCCAGCCCACCTTGTTGGTAAACGCGTGGGACTGGGAGTTTAAGAGCTAAGCTGTAGGAAAGGGATCACCGTTC
TM1	A1	Targeting	C3orf17_-_112738687.23-P1P2	TGCAAGTGTACAAATCCAGCCCACCTTGTTGGGACCCAGTCATCTGTATATGTTTAAGAGCTAAGCTGTAGGAAAGGGATCACCGTTC
TM1	A1	Targeting	C3orf17_-_112738717.23-P1P2	TGCAAGTGTACAAATCCAGCCCACCTTGTTGGACGTGGCCGCGTAGAATCAGTTTAAGAGCTAAGCTGTAGGAAAGGGATCACCGTTC
TM1	A1	Targeting	C3orf17_-_112738720.23-P1P2	TGCAAGTGTACAAATCCAGCCCACCTTGTTGGTGGCCGCGTAGAATCATGGGTTTAAGAGCTAAGCTGTAGGAAAGGGATCACCGTTC
TM1	A1	Targeting	C3orf18_+_50605203.23-P1P2	TGCAAGTGTACAAATCCAGCCCACCTTGTTGGACAGCCAATCGGAGGCCGGGTTTAAGAGCTAAGCTGTAGGAAAGGGATCACCGTTC
TM1	A1	Targeting	C3orf18_+_50605210.23-P1P2	TGCAAGTGTACAAATCCAGCCCACCTTGTTGGAGGCCCGACAGCCAATCGGGTTTAAGAGCTAAGCTGTAGGAAAGGGATCACCGTTC
TM1	A1	Targeting	C3orf18_+_50605236.23-P1P2	TGCAAGTGTACAAATCCAGCCCACCTTGTTGGGAACGGTCCAATTCTGGGCGTTTAAGAGCTAAGCTGTAGGAAAGGGATCACCGTTC
TM1	A1	Targeting	C3orf18_+_50605283.23-P1P2	TGCAAGTGTACAAATCCAGCCCACCTTGTTGGAGGTTCTAGGCTCCCTCTGGTTTAAGAGCTAAGCTGTAGGAAAGGGATCACCGTTC
TM1	A1	Targeting	C3orf18_+_50605295.23-P1P2	TGCAAGTGTACAAATCCAGCCCACCTTGTTGGAAAACTGCGACCAGGTTCTGTTTAAGAGCTAAGCTGTAGGAAAGGGATCACCGTTC
TM1	A1	Targeting	C3orf18_-_50605250.23-P1P2	TGCAAGTGTACAAATCCAGCCCACCTTGTTGGCCTAGAGCCCGCCCAGAATGTTTAAGAGCTAAGCTGTAGGAAAGGGATCACCGTTC
TM1	A1	Targeting	C3orf18_-_50605276.23-P1P2	TGCAAGTGTACAAATCCAGCCCACCTTGTTGGTTCGCTTGTCGCTCGGGTCGTTTAAGAGCTAAGCTGTAGGAAAGGGATCACCGTTC
TM1	A1	Targeting	C3orf18_-_50605359.23-P1P2	TGCAAGTGTACAAATCCAGCCCACCTTGTTGGGGCCTGCGCCGAAGTTGGGGTTTAAGAGCTAAGCTGTAGGAAAGGGATCACCGTTC
TM1	A1	Targeting	C3orf18_-_50605370.23-P1P2	TGCAAGTGTACAAATCCAGCCCACCTTGTTGGAAGTTGGGCGGAGGACAGTGTTTAAGAGCTAAGCTGTAGGAAAGGGATCACCGTTC
TM1	A1	Targeting	C3orf18_-_50605475.23-P1P2	TGCAAGTGTACAAATCCAGCCCACCTTGTTGGGATGTACAGAGGAGACTTGGTTTAAGAGCTAAGCTGTAGGAAAGGGATCACCGTTC
TM1	A1	Targeting	C3orf33_+_155524102.23-P1P2	TGCAAGTGTACAAATCCAGCCCACCTTGTTGGGGACCCCGCCGCCTTCCCGGTTTAAGAGCTAAGCTGTAGGAAAGGGATCACCGTTC
TM1	A1	Targeting	C3orf33_+_155524124.23-P1P2	TGCAAGTGTACAAATCCAGCCCACCTTGTTGGCCACCCCGGTCCGCGGGGAGTTTAAGAGCTAAGCTGTAGGAAAGGGATCACCGTTC
TM1	A1	Targeting	C3orf33_+_155524148.23-P1P2	TGCAAGTGTACAAATCCAGCCCACCTTGTTGGCACTGGCGACTGCAGGTCGGTTTAAGAGCTAAGCTGTAGGAAAGGGATCACCGTTC
TM1	A1	Targeting	C3orf33_+_155524164.23-P1P2	TGCAAGTGTACAAATCCAGCCCACCTTGTTGGATATCTGGGGCCCGCCCACGTTTAAGAGCTAAGCTGTAGGAAAGGGATCACCGTTC
TM1	A1	Targeting	C3orf33_+_155524176.23-P1P2	TGCAAGTGTACAAATCCAGCCCACCTTGTTGGTTAAGACGTCTGATATCTGGTTTAAGAGCTAAGCTGTAGGAAAGGGATCACCGTTC
TM1	A1	Targeting	C3orf33_+_155524204.23-P1P2	TGCAAGTGTACAAATCCAGCCCACCTTGTTGGACCCTGCATAAAAGCGGTTGTTTAAGAGCTAAGCTGTAGGAAAGGGATCACCGTTC
TM1	A1	Targeting	C3orf33_-_155524112.23-P1P2	TGCAAGTGTACAAATCCAGCCCACCTTGTTGGGGCGCCGCTCACCTCGGGAGTTTAAGAGCTAAGCTGTAGGAAAGGGATCACCGTTC
TM1	A1	Targeting	C3orf33_-_155524174.23-P1P2	TGCAAGTGTACAAATCCAGCCCACCTTGTTGGACCTGCAGTCGCCAGTGGGGTTTAAGAGCTAAGCTGTAGGAAAGGGATCACCGTTC
TM1	A1	Targeting	C3orf33_-_155524223.23-P1P2	TGCAAGTGTACAAATCCAGCCCACCTTGTTGGGCCCCAACCGCTTTTATGCGTTTAAGAGCTAAGCTGTAGGAAAGGGATCACCGTTC
TM1	A1	Targeting	C3orf33_-_155524265.23-P1P2	TGCAAGTGTACAAATCCAGCCCACCTTGTTGGATCTCTGAGCAGCACTGTGGTTTAAGAGCTAAGCTGTAGGAAAGGGATCACCGTTC
TM1	A1	Targeting	C3orf35_+_37427533.23-ENST00000425932.1	TGCAAGTGTACAAATCCAGCCCACCTTGTTGGCATGGAAGTTCCAGCACCCGTTTAAGAGCTAAGCTGTAGGAAAGGGATCACCGTTC
TM1	A1	Targeting	C3orf35_+_37427550.23-ENST00000425932.1	TGCAAGTGTACAAATCCAGCCCACCTTGTTGGTCAGCAGGGTGATTCTCCAGTTTAAGAGCTAAGCTGTAGGAAAGGGATCACCGTTC
TM1	A1	Targeting	C3orf35_+_37427599.23-ENST00000425932.1	TGCAAGTGTACAAATCCAGCCCACCTTGTTGGACGAATTCATTTCTTCTCAGTTTAAGAGCTAAGCTGTAGGAAAGGGATCACCGTTC
TM1	A1	Targeting	C3orf35_+_37440122.23-ENST00000328376.5	TGCAAGTGTACAAATCCAGCCCACCTTGTTGGGAGCAAGCCGCAAAATGCTGTTTAAGAGCTAAGCTGTAGGAAAGGGATCACCGTTC
TM1	A1	Targeting	C3orf35_+_37440143.23-ENST00000328376.5	TGCAAGTGTACAAATCCAGCCCACCTTGTTGGAGTAGTGTGGCTGAGTAGTGTTTAAGAGCTAAGCTGTAGGAAAGGGATCACCGTTC
TM1	A1	Targeting	C3orf35_+_37440167.23-ENST00000328376.5	TGCAAGTGTACAAATCCAGCCCACCTTGTTGGCGTGCCTCAAGGTACTGCAGTTTAAGAGCTAAGCTGTAGGAAAGGGATCACCGTTC
TM1	A1	Targeting	C3orf35_+_37440220.23-ENST00000328376.5	TGCAAGTGTACAAATCCAGCCCACCTTGTTGGCAAGAGCATTTCAGCTGGAGTTTAAGAGCTAAGCTGTAGGAAAGGGATCACCGTTC
TM1	A1	Targeting	C3orf35_+_37440224.23-ENST00000328376.5	TGCAAGTGTACAAATCCAGCCCACCTTGTTGGAGTGCAAGAGCATTTCAGCGTTTAAGAGCTAAGCTGTAGGAAAGGGATCACCGTTC
TM1	A1	Targeting	C3orf35_+_37440266.23-ENST00000328376.5	TGCAAGTGTACAAATCCAGCCCACCTTGTTGGAGATATCTGACAAAGATGAGTTTAAGAGCTAAGCTGTAGGAAAGGGATCACCGTTC
TM1	A1	Targeting	C3orf35_+_37440395.23-ENST00000328376.5	TGCAAGTGTACAAATCCAGCCCACCTTGTTGGACGGGGTTTTGCCACGTCCGTTTAAGAGCTAAGCTGTAGGAAAGGGATCACCGTTC
TM1	A1	Targeting	C3orf35_+_37440716.23-ENST00000426078.1	TGCAAGTGTACAAATCCAGCCCACCTTGTTGGCTAGAGAGAGTATACCATAGTTTAAGAGCTAAGCTGTAGGAAAGGGATCACCGTTC
TM1	A1	Targeting	C3orf35_+_37440758.23-ENST00000426078.1	TGCAAGTGTACAAATCCAGCCCACCTTGTTGGGAGAAGAAAAGGTGACAATGTTTAAGAGCTAAGCTGTAGGAAAGGGATCACCGTTC
TM1	A1	Targeting	C3orf35_+_37440848.23-ENST00000426078.1	TGCAAGTGTACAAATCCAGCCCACCTTGTTGGTGAACACCTACTGGGTTTCGTTTAAGAGCTAAGCTGTAGGAAAGGGATCACCGTTC
TM1	A1	Targeting	C3orf35_+_37441012.23-ENST00000426078.1	TGCAAGTGTACAAATCCAGCCCACCTTGTTGGACCTGATTCCCTTACATGTGTTTAAGAGCTAAGCTGTAGGAAAGGGATCACCGTTC
TM1	A1	Targeting	C3orf35_+_37452452.23-ENST00000425564.2	TGCAAGTGTACAAATCCAGCCCACCTTGTTGGTCCCAGTAGTTGTAATCATGTTTAAGAGCTAAGCTGTAGGAAAGGGATCACCGTTC
TM1	A1	Targeting	C3orf35_+_37452523.23-ENST00000425564.2	TGCAAGTGTACAAATCCAGCCCACCTTGTTGGGCCAGGCAGAGGTTACTGAGTTTAAGAGCTAAGCTGTAGGAAAGGGATCACCGTTC
TM1	A1	Targeting	C3orf35_+_37452567.23-ENST00000425564.2	TGCAAGTGTACAAATCCAGCCCACCTTGTTGGGCTAATGGTAGAGCCCTTAGTTTAAGAGCTAAGCTGTAGGAAAGGGATCACCGTTC
TM1	A1	Targeting	C3orf35_+_37452604.23-ENST00000425564.2	TGCAAGTGTACAAATCCAGCCCACCTTGTTGGGCAGAGAAGAACGCAAGCCGTTTAAGAGCTAAGCTGTAGGAAAGGGATCACCGTTC
TM1	A1	Targeting	C3orf35_+_37452640.23-ENST00000425564.2	TGCAAGTGTACAAATCCAGCCCACCTTGTTGGTGGACCCACCTGGGAACAGGTTTAAGAGCTAAGCTGTAGGAAAGGGATCACCGTTC
TM1	A1	Targeting	C3orf35_-_37427422.23-ENST00000425932.1	TGCAAGTGTACAAATCCAGCCCACCTTGTTGGCACACCACGTGAGTGATGCGTTTAAGAGCTAAGCTGTAGGAAAGGGATCACCGTTC
TM1	A1	Targeting	C3orf35_-_37427454.23-ENST00000425932.1	TGCAAGTGTACAAATCCAGCCCACCTTGTTGGCATGCAGGAACTCCAGGCAGTTTAAGAGCTAAGCTGTAGGAAAGGGATCACCGTTC
TM1	A1	Targeting	C3orf35_-_37427538.23-ENST00000425932.1	TGCAAGTGTACAAATCCAGCCCACCTTGTTGGAAGATGCCTGCATATCCCAGTTTAAGAGCTAAGCTGTAGGAAAGGGATCACCGTTC
TM1	A1	Targeting	C3orf35_-_37427544.23-ENST00000425932.1	TGCAAGTGTACAAATCCAGCCCACCTTGTTGGCCTGCATATCCCAGGGTGCGTTTAAGAGCTAAGCTGTAGGAAAGGGATCACCGTTC
TM1	A1	Targeting	C3orf35_-_37427585.23-ENST00000425932.1	TGCAAGTGTACAAATCCAGCCCACCTTGTTGGCCTGCTGAAGACGAGCTAGGTTTAAGAGCTAAGCTGTAGGAAAGGGATCACCGTTC
TM1	A1	Targeting	C3orf35_-_37427627.23-ENST00000425932.1	TGCAAGTGTACAAATCCAGCCCACCTTGTTGGAAGAAATGAATTCGTGAGAGTTTAAGAGCTAAGCTGTAGGAAAGGGATCACCGTTC
TM1	A1	Targeting	C3orf35_-_37427707.23-ENST00000425932.1	TGCAAGTGTACAAATCCAGCCCACCTTGTTGGCTGGAAGAAACCTTAACATGTTTAAGAGCTAAGCTGTAGGAAAGGGATCACCGTTC
TM1	A1	Targeting	C3orf35_-_37440136.23-ENST00000328376.5	TGCAAGTGTACAAATCCAGCCCACCTTGTTGGCTGATTGCCTAGCATTTTGGTTTAAGAGCTAAGCTGTAGGAAAGGGATCACCGTTC
TM1	A1	Targeting	C3orf35_-_37440184.23-ENST00000328376.5	TGCAAGTGTACAAATCCAGCCCACCTTGTTGGCTCTCCTTGCAGTACCTTGGTTTAAGAGCTAAGCTGTAGGAAAGGGATCACCGTTC
TM1	A1	Targeting	C3orf35_-_37440202.23-ENST00000328376.5	TGCAAGTGTACAAATCCAGCCCACCTTGTTGGGAGGCACGTTCTTACCTCAGTTTAAGAGCTAAGCTGTAGGAAAGGGATCACCGTTC
TM1	A1	Targeting	C3orf35_-_37440830.23-ENST00000426078.1	TGCAAGTGTACAAATCCAGCCCACCTTGTTGGCTTAATCTGTTATGTTCACGTTTAAGAGCTAAGCTGTAGGAAAGGGATCACCGTTC
TM1	A1	Targeting	C3orf35_-_37440884.23-ENST00000426078.1	TGCAAGTGTACAAATCCAGCCCACCTTGTTGGGTGTTCAATAAGTTCTGGAGTTTAAGAGCTAAGCTGTAGGAAAGGGATCACCGTTC
TM1	A1	Targeting	C3orf35_-_37440913.23-ENST00000426078.1	TGCAAGTGTACAAATCCAGCCCACCTTGTTGGAATGACTCCTCTCACTGTAGTTTAAGAGCTAAGCTGTAGGAAAGGGATCACCGTTC
TM1	A1	Targeting	C3orf35_-_37440922.23-ENST00000426078.1	TGCAAGTGTACAAATCCAGCCCACCTTGTTGGTCTCACTGTAAGGAAGTTTGTTTAAGAGCTAAGCTGTAGGAAAGGGATCACCGTTC
TM1	A1	Targeting	C3orf35_-_37440977.23-ENST00000426078.1	TGCAAGTGTACAAATCCAGCCCACCTTGTTGGTCTCTTTGCAGGGGAGAAAGTTTAAGAGCTAAGCTGTAGGAAAGGGATCACCGTTC
TM1	A1	Targeting	C3orf35_-_37441025.23-ENST00000426078.1	TGCAAGTGTACAAATCCAGCCCACCTTGTTGGCATGTTCCCCAACATGTAAGTTTAAGAGCTAAGCTGTAGGAAAGGGATCACCGTTC
TM1	A1	Targeting	C3orf35_-_37452255.23-ENST00000425564.2	TGCAAGTGTACAAATCCAGCCCACCTTGTTGGAGCAGCCATATCTGTATGAGTTTAAGAGCTAAGCTGTAGGAAAGGGATCACCGTTC
TM1	A1	Targeting	C3orf35_-_37452346.23-ENST00000425564.2	TGCAAGTGTACAAATCCAGCCCACCTTGTTGGAAGATCTGGAAAGATTCACGTTTAAGAGCTAAGCTGTAGGAAAGGGATCACCGTTC
TM1	A1	Targeting	C3orf35_-_37452472.23-ENST00000425564.2	TGCAAGTGTACAAATCCAGCCCACCTTGTTGGCCCTATGATTACAACTACTGTTTAAGAGCTAAGCTGTAGGAAAGGGATCACCGTTC
TM1	A1	Targeting	C3orf35_-_37452487.23-ENST00000425564.2	TGCAAGTGTACAAATCCAGCCCACCTTGTTGGTACTGGGACTATGCTGGTCGTTTAAGAGCTAAGCTGTAGGAAAGGGATCACCGTTC
TM1	A1	Targeting	C3orf35_-_37452653.23-ENST00000425564.2	TGCAAGTGTACAAATCCAGCCCACCTTGTTGGGCACATTCCCCCTGTTCCCGTTTAAGAGCTAAGCTGTAGGAAAGGGATCACCGTTC
TM1	A1	Targeting	C3orf80_+_159943258.23-P1P2	TGCAAGTGTACAAATCCAGCCCACCTTGTTGGTCCTCACTTGGCCACGCTTGTTTAAGAGCTAAGCTGTAGGAAAGGGATCACCGTTC
TM1	A1	Targeting	C3orf80_+_159943289.23-P1P2	TGCAAGTGTACAAATCCAGCCCACCTTGTTGGCCCGCGCCTCAGCTACCTGGTTTAAGAGCTAAGCTGTAGGAAAGGGATCACCGTTC
TM1	A1	Targeting	C3orf80_+_159943392.23-P1P2	TGCAAGTGTACAAATCCAGCCCACCTTGTTGGCAGACCTCGGCTAACGTCCGTTTAAGAGCTAAGCTGTAGGAAAGGGATCACCGTTC
TM1	A1	Targeting	C3orf80_+_159943420.23-P1P2	TGCAAGTGTACAAATCCAGCCCACCTTGTTGGGTGACCCCGGGTCCCCACAGTTTAAGAGCTAAGCTGTAGGAAAGGGATCACCGTTC
TM1	A1	Targeting	C3orf80_+_159943521.23-P1P2	TGCAAGTGTACAAATCCAGCCCACCTTGTTGGAGCCCCCGCCGCCCCGCGAGTTTAAGAGCTAAGCTGTAGGAAAGGGATCACCGTTC
TM1	A1	Targeting	C3orf80_-_159942972.23-P1P2	TGCAAGTGTACAAATCCAGCCCACCTTGTTGGCTGGCGGGCCTAAGCGCGAGTTTAAGAGCTAAGCTGTAGGAAAGGGATCACCGTTC
TM1	A1	Targeting	C3orf80_-_159943346.23-P1P2	TGCAAGTGTACAAATCCAGCCCACCTTGTTGGGGACCCGAGCGGAGCGCCGGTTTAAGAGCTAAGCTGTAGGAAAGGGATCACCGTTC
TM1	A1	Targeting	C3orf80_-_159943367.23-P1P2	TGCAAGTGTACAAATCCAGCCCACCTTGTTGGGAGGGGCCGACGGACGCGAGTTTAAGAGCTAAGCTGTAGGAAAGGGATCACCGTTC
TM1	A1	Targeting	C3orf80_-_159943450.23-P1P2	TGCAAGTGTACAAATCCAGCCCACCTTGTTGGGACCCGGGGTCACTGCTGAGTTTAAGAGCTAAGCTGTAGGAAAGGGATCACCGTTC
TM1	A1	Targeting	C3orf80_-_159943461.23-P1P2	TGCAAGTGTACAAATCCAGCCCACCTTGTTGGACTGCTGAGGGCCTGTCGGGTTTAAGAGCTAAGCTGTAGGAAAGGGATCACCGTTC
TM1	A1	Targeting	C4orf32_+_113066472.23-P1P2	TGCAAGTGTACAAATCCAGCCCACCTTGTTGGGGGCCAACGGTGTGTTGGGGTTTAAGAGCTAAGCTGTAGGAAAGGGATCACCGTTC
TM1	A1	Targeting	C4orf32_+_113066475.23-P1P2	TGCAAGTGTACAAATCCAGCCCACCTTGTTGGGCGGGGCCAACGGTGTGTTGTTTAAGAGCTAAGCTGTAGGAAAGGGATCACCGTTC
TM1	A1	Targeting	C4orf32_+_113066498.23-P1P2	TGCAAGTGTACAAATCCAGCCCACCTTGTTGGCAGGGGAGGGGCCAAGACAGTTTAAGAGCTAAGCTGTAGGAAAGGGATCACCGTTC
TM1	A1	Targeting	C4orf32_+_113066510.23-P1P2	TGCAAGTGTACAAATCCAGCCCACCTTGTTGGGGCGGAGCCGTACAGGGGAGTTTAAGAGCTAAGCTGTAGGAAAGGGATCACCGTTC
TM1	A1	Targeting	C4orf32_+_113066514.23-P1P2	TGCAAGTGTACAAATCCAGCCCACCTTGTTGGTCGGGGCGGAGCCGTACAGGTTTAAGAGCTAAGCTGTAGGAAAGGGATCACCGTTC
TM1	A1	Targeting	C4orf32_+_113066527.23-P1P2	TGCAAGTGTACAAATCCAGCCCACCTTGTTGGCAACCCCCGGCCGTCGGGGGTTTAAGAGCTAAGCTGTAGGAAAGGGATCACCGTTC
TM1	A1	Targeting	C4orf32_+_113066532.23-P1P2	TGCAAGTGTACAAATCCAGCCCACCTTGTTGGTCGCCCAACCCCCGGCCGTGTTTAAGAGCTAAGCTGTAGGAAAGGGATCACCGTTC
TM1	A1	Targeting	C4orf32_+_113066555.23-P1P2	TGCAAGTGTACAAATCCAGCCCACCTTGTTGGGCCCGGCCCCTCCTGTCACGTTTAAGAGCTAAGCTGTAGGAAAGGGATCACCGTTC
TM1	A1	Targeting	C4orf32_-_113066490.23-P1P2	TGCAAGTGTACAAATCCAGCCCACCTTGTTGGCCGCCCCCCAACACACCGTGTTTAAGAGCTAAGCTGTAGGAAAGGGATCACCGTTC
TM1	A1	Targeting	C4orf32_-_113066569.23-P1P2	TGCAAGTGTACAAATCCAGCCCACCTTGTTGGGGGCGAGCCAGTGACAGGAGTTTAAGAGCTAAGCTGTAGGAAAGGGATCACCGTTC
TM1	A1	Targeting	C4orf3_+_120221832.23-P1P2	TGCAAGTGTACAAATCCAGCCCACCTTGTTGGCCTGCGCGCTGGGAAGAGTGTTTAAGAGCTAAGCTGTAGGAAAGGGATCACCGTTC
TM1	A1	Targeting	C4orf3_+_120221876.23-P1P2	TGCAAGTGTACAAATCCAGCCCACCTTGTTGGTTCATGCCAGCGGTCACGGGTTTAAGAGCTAAGCTGTAGGAAAGGGATCACCGTTC
TM1	A1	Targeting	C4orf3_+_120221885.23-P1P2	TGCAAGTGTACAAATCCAGCCCACCTTGTTGGAGGCCGCGCTTCATGCCAGGTTTAAGAGCTAAGCTGTAGGAAAGGGATCACCGTTC
TM1	A1	Targeting	C4orf3_+_120221904.23-P1P2	TGCAAGTGTACAAATCCAGCCCACCTTGTTGGTGACTTAGTGTCAAGGCGGGTTTAAGAGCTAAGCTGTAGGAAAGGGATCACCGTTC
TM1	A1	Targeting	C4orf3_+_120221910.23-P1P2	TGCAAGTGTACAAATCCAGCCCACCTTGTTGGGCCCATTGACTTAGTGTCAGTTTAAGAGCTAAGCTGTAGGAAAGGGATCACCGTTC
TM1	A1	Targeting	C4orf3_+_120221931.23-P1P2	TGCAAGTGTACAAATCCAGCCCACCTTGTTGGCCGCGAGGCAGAAGTAGGCGTTTAAGAGCTAAGCTGTAGGAAAGGGATCACCGTTC
TM1	A1	Targeting	C4orf3_+_120221935.23-P1P2	TGCAAGTGTACAAATCCAGCCCACCTTGTTGGGACGCCGCGAGGCAGAAGTGTTTAAGAGCTAAGCTGTAGGAAAGGGATCACCGTTC
TM1	A1	Targeting	C4orf3_-_120221891.23-P1P2	TGCAAGTGTACAAATCCAGCCCACCTTGTTGGCCGCTGCCTCCGTGACCGCGTTTAAGAGCTAAGCTGTAGGAAAGGGATCACCGTTC
TM1	A1	Targeting	C4orf3_-_120221903.23-P1P2	TGCAAGTGTACAAATCCAGCCCACCTTGTTGGTGACCGCTGGCATGAAGCGGTTTAAGAGCTAAGCTGTAGGAAAGGGATCACCGTTC
TM1	A1	Targeting	C4orf3_-_120221961.23-P1P2	TGCAAGTGTACAAATCCAGCCCACCTTGTTGGTTCTGCCTCGCGGCGTCCCGTTTAAGAGCTAAGCTGTAGGAAAGGGATCACCGTTC
TM1	A1	Targeting	C5orf15_+_133304508.23-P1P2	TGCAAGTGTACAAATCCAGCCCACCTTGTTGGGGCAGGGAGGGGCTCGCTTGTTTAAGAGCTAAGCTGTAGGAAAGGGATCACCGTTC
TM1	A1	Targeting	C5orf15_-_133304392.23-P1P2	TGCAAGTGTACAAATCCAGCCCACCTTGTTGGGAAGCCTGGAGACGTGCTCGTTTAAGAGCTAAGCTGTAGGAAAGGGATCACCGTTC
TM1	A1	Targeting	C5orf15_-_133304409.23-P1P2	TGCAAGTGTACAAATCCAGCCCACCTTGTTGGTCTGGAAACCGGAATAAGAGTTTAAGAGCTAAGCTGTAGGAAAGGGATCACCGTTC
TM1	A1	Targeting	C5orf15_-_133304413.23-P1P2	TGCAAGTGTACAAATCCAGCCCACCTTGTTGGGAAACCGGAATAAGAAGGAGTTTAAGAGCTAAGCTGTAGGAAAGGGATCACCGTTC
TM1	A1	Targeting	C5orf15_-_133304453.23-P1P2	TGCAAGTGTACAAATCCAGCCCACCTTGTTGGTTGCCGCTAGGCGAAAGTGGTTTAAGAGCTAAGCTGTAGGAAAGGGATCACCGTTC
TM1	A1	Targeting	C5orf15_-_133304469.23-P1P2	TGCAAGTGTACAAATCCAGCCCACCTTGTTGGGTGGGGACCGCCACACAGTGTTTAAGAGCTAAGCTGTAGGAAAGGGATCACCGTTC
TM1	A1	Targeting	C5orf15_-_133304483.23-P1P2	TGCAAGTGTACAAATCCAGCCCACCTTGTTGGACAGTTGGCTGCGGATTAAGTTTAAGAGCTAAGCTGTAGGAAAGGGATCACCGTTC
TM1	A1	Targeting	C5orf15_-_133304488.23-P1P2	TGCAAGTGTACAAATCCAGCCCACCTTGTTGGTGGCTGCGGATTAAAGGTAGTTTAAGAGCTAAGCTGTAGGAAAGGGATCACCGTTC
TM1	A1	Targeting	C5orf15_-_133304506.23-P1P2	TGCAAGTGTACAAATCCAGCCCACCTTGTTGGAGGGTGTGACGTGCTGAAGGTTTAAGAGCTAAGCTGTAGGAAAGGGATCACCGTTC
TM1	A1	Targeting	C5orf15_-_133304543.23-P1P2	TGCAAGTGTACAAATCCAGCCCACCTTGTTGGTCCCTGCCGCCTGCATGATGTTTAAGAGCTAAGCTGTAGGAAAGGGATCACCGTTC
TM1	A1	Targeting	C5orf60_+_179072140.23-P1P2	TGCAAGTGTACAAATCCAGCCCACCTTGTTGGTGCAGGGGTGGGTGGTGGTGTTTAAGAGCTAAGCTGTAGGAAAGGGATCACCGTTC
TM1	A1	Targeting	C5orf60_+_179072154.23-P1P2	TGCAAGTGTACAAATCCAGCCCACCTTGTTGGAGGGTGGAGGGAACTGCAGGTTTAAGAGCTAAGCTGTAGGAAAGGGATCACCGTTC
TM1	A1	Targeting	C5orf60_+_179072205.23-P1P2	TGCAAGTGTACAAATCCAGCCCACCTTGTTGGTTCTGACAGGTTGAGCAGGGTTTAAGAGCTAAGCTGTAGGAAAGGGATCACCGTTC
TM1	A1	Targeting	C5orf60_+_179072208.23-P1P2	TGCAAGTGTACAAATCCAGCCCACCTTGTTGGTGTTTCTGACAGGTTGAGCGTTTAAGAGCTAAGCTGTAGGAAAGGGATCACCGTTC
TM1	A1	Targeting	C5orf60_+_179072232.23-P1P2	TGCAAGTGTACAAATCCAGCCCACCTTGTTGGAGAGGACGGAAAACGGACCGTTTAAGAGCTAAGCTGTAGGAAAGGGATCACCGTTC
TM1	A1	Targeting	C5orf60_+_179072245.23-P1P2	TGCAAGTGTACAAATCCAGCCCACCTTGTTGGGTGTGCCAGGGCAAGAGGAGTTTAAGAGCTAAGCTGTAGGAAAGGGATCACCGTTC
TM1	A1	Targeting	C5orf60_+_179072341.23-P1P2	TGCAAGTGTACAAATCCAGCCCACCTTGTTGGGGAAATAACAGGAATTTCAGTTTAAGAGCTAAGCTGTAGGAAAGGGATCACCGTTC
TM1	A1	Targeting	C5orf60_+_179072385.23-P1P2	TGCAAGTGTACAAATCCAGCCCACCTTGTTGGGGTTGCAGTGAGCAGGCAGGTTTAAGAGCTAAGCTGTAGGAAAGGGATCACCGTTC
TM1	A1	Targeting	C5orf60_-_179072261.23-P1P2	TGCAAGTGTACAAATCCAGCCCACCTTGTTGGGTTTTCCGTCCTCTTGCCCGTTTAAGAGCTAAGCTGTAGGAAAGGGATCACCGTTC
TM1	A1	Targeting	C5orf60_-_179072272.23-P1P2	TGCAAGTGTACAAATCCAGCCCACCTTGTTGGTCTTGCCCTGGCACACAGAGTTTAAGAGCTAAGCTGTAGGAAAGGGATCACCGTTC
TM1	A1	Targeting	C6orf10_+_32339884.23-P1P2	TGCAAGTGTACAAATCCAGCCCACCTTGTTGGATTAATGATGTACAATCTCGTTTAAGAGCTAAGCTGTAGGAAAGGGATCACCGTTC
TM1	A1	Targeting	C6orf10_+_32340211.23-P1P2	TGCAAGTGTACAAATCCAGCCCACCTTGTTGGGAGTTACAAACATTAGGCTGTTTAAGAGCTAAGCTGTAGGAAAGGGATCACCGTTC
TM1	A1	Targeting	C6orf10_-_32339747.23-P1P2	TGCAAGTGTACAAATCCAGCCCACCTTGTTGGCTTAGAACATTAGTGAGGCGTTTAAGAGCTAAGCTGTAGGAAAGGGATCACCGTTC
TM1	A1	Targeting	C6orf10_-_32339770.23-P1P2	TGCAAGTGTACAAATCCAGCCCACCTTGTTGGGAAAAGGCAGAGGATCAAAGTTTAAGAGCTAAGCTGTAGGAAAGGGATCACCGTTC
TM1	A1	Targeting	C6orf10_-_32339775.23-P1P2	TGCAAGTGTACAAATCCAGCCCACCTTGTTGGGGCAGAGGATCAAAAGGCTGTTTAAGAGCTAAGCTGTAGGAAAGGGATCACCGTTC
TM1	A1	Targeting	C6orf10_-_32339816.23-P1P2	TGCAAGTGTACAAATCCAGCCCACCTTGTTGGGAGGACCTTGAACTTGTATGTTTAAGAGCTAAGCTGTAGGAAAGGGATCACCGTTC
TM1	A1	Targeting	C6orf10_-_32339823.23-P1P2	TGCAAGTGTACAAATCCAGCCCACCTTGTTGGTTGAACTTGTATAGGATACGTTTAAGAGCTAAGCTGTAGGAAAGGGATCACCGTTC
TM1	A1	Targeting	C6orf10_-_32339828.23-P1P2	TGCAAGTGTACAAATCCAGCCCACCTTGTTGGCTTGTATAGGATACTGGAAGTTTAAGAGCTAAGCTGTAGGAAAGGGATCACCGTTC
TM1	A1	Targeting	C6orf10_-_32339844.23-P1P2	TGCAAGTGTACAAATCCAGCCCACCTTGTTGGGAAGGGAACTCACTCTTTCGTTTAAGAGCTAAGCTGTAGGAAAGGGATCACCGTTC
TM1	A1	Targeting	C6orf10_-_32340238.23-P1P2	TGCAAGTGTACAAATCCAGCCCACCTTGTTGGCTAATGTTTGTAACTCTTGGTTTAAGAGCTAAGCTGTAGGAAAGGGATCACCGTTC
TM1	A1	Targeting	C6orf25_+_31691005.23-P1P2	TGCAAGTGTACAAATCCAGCCCACCTTGTTGGCAGCTGCCCAGATCCCTTTGTTTAAGAGCTAAGCTGTAGGAAAGGGATCACCGTTC
TM1	A1	Targeting	C6orf25_+_31691037.23-P1P2	TGCAAGTGTACAAATCCAGCCCACCTTGTTGGGGGGGCTCCGATAAGAGAGGTTTAAGAGCTAAGCTGTAGGAAAGGGATCACCGTTC
TM1	A1	Targeting	C6orf25_+_31691057.23-P1P2	TGCAAGTGTACAAATCCAGCCCACCTTGTTGGTGGGGAGAACGGAGGGGCTGTTTAAGAGCTAAGCTGTAGGAAAGGGATCACCGTTC
TM1	A1	Targeting	C6orf25_+_31691063.23-P1P2	TGCAAGTGTACAAATCCAGCCCACCTTGTTGGTAGGCGTGGGGAGAACGGAGTTTAAGAGCTAAGCTGTAGGAAAGGGATCACCGTTC
TM1	A1	Targeting	C6orf25_+_31691075.23-P1P2	TGCAAGTGTACAAATCCAGCCCACCTTGTTGGCCGGAGGGAAGTTAGGCGTGTTTAAGAGCTAAGCTGTAGGAAAGGGATCACCGTTC
TM1	A1	Targeting	C6orf25_+_31691098.23-P1P2	TGCAAGTGTACAAATCCAGCCCACCTTGTTGGGCGTGGGGCCGGTTGGGGGGTTTAAGAGCTAAGCTGTAGGAAAGGGATCACCGTTC
TM1	A1	Targeting	C6orf25_+_31691103.23-P1P2	TGCAAGTGTACAAATCCAGCCCACCTTGTTGGCAGCGGCGTGGGGCCGGTTGTTTAAGAGCTAAGCTGTAGGAAAGGGATCACCGTTC
TM1	A1	Targeting	C6orf25_+_31691113.23-P1P2	TGCAAGTGTACAAATCCAGCCCACCTTGTTGGGCGAGCGAATCAGCGGCGTGTTTAAGAGCTAAGCTGTAGGAAAGGGATCACCGTTC
TM1	A1	Targeting	C6orf25_-_31691012.23-P1P2	TGCAAGTGTACAAATCCAGCCCACCTTGTTGGTGCCTGCGAGGATTCCCAAGTTTAAGAGCTAAGCTGTAGGAAAGGGATCACCGTTC
TM1	A1	Targeting	C6orf25_-_31691020.23-P1P2	TGCAAGTGTACAAATCCAGCCCACCTTGTTGGAGGATTCCCAAAGGGATCTGTTTAAGAGCTAAGCTGTAGGAAAGGGATCACCGTTC
TM1	A1	Targeting	C6orf89_+_36853347.23-P1P2	TGCAAGTGTACAAATCCAGCCCACCTTGTTGGAAGAGCAGCCCCTTCCTTCGTTTAAGAGCTAAGCTGTAGGAAAGGGATCACCGTTC
TM1	A1	Targeting	C6orf89_+_36853572.23-P1P2	TGCAAGTGTACAAATCCAGCCCACCTTGTTGGCGCGATATCTGGAGAGTGTGTTTAAGAGCTAAGCTGTAGGAAAGGGATCACCGTTC
TM1	A1	Targeting	C6orf89_+_36853600.23-P1P2	TGCAAGTGTACAAATCCAGCCCACCTTGTTGGTCAGTGTCGTGGCGAGCGCGTTTAAGAGCTAAGCTGTAGGAAAGGGATCACCGTTC
TM1	A1	Targeting	C6orf89_-_36853315.23-P1P2	TGCAAGTGTACAAATCCAGCCCACCTTGTTGGGGGCTGAGTGAAAACTGGAGTTTAAGAGCTAAGCTGTAGGAAAGGGATCACCGTTC
TM1	A1	Targeting	C6orf89_-_36853526.23-P1P2	TGCAAGTGTACAAATCCAGCCCACCTTGTTGGAAGACAAGGATTTAGGACTGTTTAAGAGCTAAGCTGTAGGAAAGGGATCACCGTTC
TM1	A1	Targeting	C6orf89_-_36853545.23-P1P2	TGCAAGTGTACAAATCCAGCCCACCTTGTTGGGGGGCGAAAAGAGCCAGAAGTTTAAGAGCTAAGCTGTAGGAAAGGGATCACCGTTC
TM1	A1	Targeting	C6orf89_-_36853552.23-P1P2	TGCAAGTGTACAAATCCAGCCCACCTTGTTGGAAAGAGCCAGAACGGAAGAGTTTAAGAGCTAAGCTGTAGGAAAGGGATCACCGTTC
TM1	A1	Targeting	C6orf89_-_36853562.23-P1P2	TGCAAGTGTACAAATCCAGCCCACCTTGTTGGAACGGAAGAAGGACGCCAGGTTTAAGAGCTAAGCTGTAGGAAAGGGATCACCGTTC
TM1	A1	Targeting	C6orf89_-_36853636.23-P1P2	TGCAAGTGTACAAATCCAGCCCACCTTGTTGGACACTGAGTGTTCTGTTTTGTTTAAGAGCTAAGCTGTAGGAAAGGGATCACCGTTC
TM1	A1	Targeting	C6orf89_-_36853729.23-P1P2	TGCAAGTGTACAAATCCAGCCCACCTTGTTGGGGGTCGCGCTCCCGGAAACGTTTAAGAGCTAAGCTGTAGGAAAGGGATCACCGTTC
TM1	A1	Targeting	C7orf34_+_142636047.23-P1P2	TGCAAGTGTACAAATCCAGCCCACCTTGTTGGTGGGGAGGAGCATAGGGTAGTTTAAGAGCTAAGCTGTAGGAAAGGGATCACCGTTC
TM1	A1	Targeting	C7orf34_+_142636139.23-P1P2	TGCAAGTGTACAAATCCAGCCCACCTTGTTGGAGGCCCAGAACAGATGAGCGTTTAAGAGCTAAGCTGTAGGAAAGGGATCACCGTTC
TM1	A1	Targeting	C7orf34_+_142636445.23-P1P2	TGCAAGTGTACAAATCCAGCCCACCTTGTTGGGCTTCCAAGATGACCACAGGTTTAAGAGCTAAGCTGTAGGAAAGGGATCACCGTTC
TM1	A1	Targeting	C7orf34_+_142636492.23-P1P2	TGCAAGTGTACAAATCCAGCCCACCTTGTTGGCAATGGCGAGGCACAAGAAGTTTAAGAGCTAAGCTGTAGGAAAGGGATCACCGTTC
TM1	A1	Targeting	C7orf34_+_142636546.23-P1P2	TGCAAGTGTACAAATCCAGCCCACCTTGTTGGTCTGTGACATCACAGCCATGTTTAAGAGCTAAGCTGTAGGAAAGGGATCACCGTTC
TM1	A1	Targeting	C7orf34_-_142636391.23-P1P2	TGCAAGTGTACAAATCCAGCCCACCTTGTTGGCGTGGATCTAATGGTGTAAGTTTAAGAGCTAAGCTGTAGGAAAGGGATCACCGTTC
TM1	A1	Targeting	C7orf34_-_142636453.23-P1P2	TGCAAGTGTACAAATCCAGCCCACCTTGTTGGAATACAGAATGACCCACTGGTTTAAGAGCTAAGCTGTAGGAAAGGGATCACCGTTC
TM1	A1	Targeting	C7orf34_-_142636462.23-P1P2	TGCAAGTGTACAAATCCAGCCCACCTTGTTGGTGACCCACTGTGGTCATCTGTTTAAGAGCTAAGCTGTAGGAAAGGGATCACCGTTC
TM1	A1	Targeting	C7orf34_-_142636596.23-P1P2	TGCAAGTGTACAAATCCAGCCCACCTTGTTGGAAGTCAGAGGTCCTATGGAGTTTAAGAGCTAAGCTGTAGGAAAGGGATCACCGTTC
TM1	A1	Targeting	C7orf34_-_142636603.23-P1P2	TGCAAGTGTACAAATCCAGCCCACCTTGTTGGAGGTCCTATGGAAGGTGAGGTTTAAGAGCTAAGCTGTAGGAAAGGGATCACCGTTC
TM1	A1	Targeting	C7orf60_+_112580144.23-P1P2	TGCAAGTGTACAAATCCAGCCCACCTTGTTGGTGCGCACAGAATCCGGGGAGTTTAAGAGCTAAGCTGTAGGAAAGGGATCACCGTTC
TM1	A1	Targeting	C7orf60_+_112580148.23-P1P2	TGCAAGTGTACAAATCCAGCCCACCTTGTTGGCGCCTGCGCACAGAATCCGGTTTAAGAGCTAAGCTGTAGGAAAGGGATCACCGTTC
TM1	A1	Targeting	C7orf60_-_112580012.23-P1P2	TGCAAGTGTACAAATCCAGCCCACCTTGTTGGCGGAAACGGAAAAGGCTAAGTTTAAGAGCTAAGCTGTAGGAAAGGGATCACCGTTC
TM1	A1	Targeting	C7orf60_-_112580020.23-P1P2	TGCAAGTGTACAAATCCAGCCCACCTTGTTGGGAAAAGGCTAAGGGCCAATGTTTAAGAGCTAAGCTGTAGGAAAGGGATCACCGTTC
TM1	A1	Targeting	C7orf60_-_112580033.23-P1P2	TGCAAGTGTACAAATCCAGCCCACCTTGTTGGGCCAATGGGCAGAAAGCGCGTTTAAGAGCTAAGCTGTAGGAAAGGGATCACCGTTC
TM1	A1	Targeting	C7orf60_-_112580045.23-P1P2	TGCAAGTGTACAAATCCAGCCCACCTTGTTGGAAAGCGCCGGCGGCGAACCGTTTAAGAGCTAAGCTGTAGGAAAGGGATCACCGTTC
TM1	A1	Targeting	C7orf60_-_112580054.23-P1P2	TGCAAGTGTACAAATCCAGCCCACCTTGTTGGGCGGCGAACCCGGTTGTTTGTTTAAGAGCTAAGCTGTAGGAAAGGGATCACCGTTC
TM1	A1	Targeting	C7orf60_-_112580058.23-P1P2	TGCAAGTGTACAAATCCAGCCCACCTTGTTGGCGAACCCGGTTGTTTGGGAGTTTAAGAGCTAAGCTGTAGGAAAGGGATCACCGTTC
TM1	A1	Targeting	C7orf60_-_112580069.23-P1P2	TGCAAGTGTACAAATCCAGCCCACCTTGTTGGGTTTGGGAAGGCGAGCAGCGTTTAAGAGCTAAGCTGTAGGAAAGGGATCACCGTTC
TM1	A1	Targeting	C7orf60_-_112580095.23-P1P2	TGCAAGTGTACAAATCCAGCCCACCTTGTTGGGGCGGAGCTTGCGGGGATAGTTTAAGAGCTAAGCTGTAGGAAAGGGATCACCGTTC
TM1	A1	Targeting	C9orf57_+_74675532.23-P1P2	TGCAAGTGTACAAATCCAGCCCACCTTGTTGGTAAACTGTTTGGAATCTAGGTTTAAGAGCTAAGCTGTAGGAAAGGGATCACCGTTC
TM1	A1	Targeting	C9orf57_+_74675743.23-P1P2	TGCAAGTGTACAAATCCAGCCCACCTTGTTGGAATAGATAGTATGCCCACAGTTTAAGAGCTAAGCTGTAGGAAAGGGATCACCGTTC
TM1	A1	Targeting	C9orf57_+_74675943.23-P1P2	TGCAAGTGTACAAATCCAGCCCACCTTGTTGGGATGGGAACATAGTCAAAGGTTTAAGAGCTAAGCTGTAGGAAAGGGATCACCGTTC
TM1	A1	Targeting	C9orf57_+_74675959.23-P1P2	TGCAAGTGTACAAATCCAGCCCACCTTGTTGGGACACTCACTGGGTTTGATGTTTAAGAGCTAAGCTGTAGGAAAGGGATCACCGTTC
TM1	A1	Targeting	C9orf57_+_74675985.23-P1P2	TGCAAGTGTACAAATCCAGCCCACCTTGTTGGTTGATAATGTGGTTACATTGTTTAAGAGCTAAGCTGTAGGAAAGGGATCACCGTTC
TM1	A1	Targeting	C9orf57_+_74675995.23-P1P2	TGCAAGTGTACAAATCCAGCCCACCTTGTTGGACCCAACATATTGATAATGGTTTAAGAGCTAAGCTGTAGGAAAGGGATCACCGTTC
TM1	A1	Targeting	C9orf57_-_74675663.23-P1P2	TGCAAGTGTACAAATCCAGCCCACCTTGTTGGTAATATAATAAGGCTAAGTGTTTAAGAGCTAAGCTGTAGGAAAGGGATCACCGTTC
TM1	A1	Targeting	C9orf57_-_74675689.23-P1P2	TGCAAGTGTACAAATCCAGCCCACCTTGTTGGTAGTTAAACTAACTAAATTGTTTAAGAGCTAAGCTGTAGGAAAGGGATCACCGTTC
TM1	A1	Targeting	C9orf57_-_74675751.23-P1P2	TGCAAGTGTACAAATCCAGCCCACCTTGTTGGCAGAAATAGATTGCCTTGTGTTTAAGAGCTAAGCTGTAGGAAAGGGATCACCGTTC
TM1	A1	Targeting	C9orf57_-_74676015.23-P1P2	TGCAAGTGTACAAATCCAGCCCACCTTGTTGGACCACATTATCAATATGTTGTTTAAGAGCTAAGCTGTAGGAAAGGGATCACCGTTC
TM1	A1	Targeting	C9orf84_+_114557243.23-P1P2	TGCAAGTGTACAAATCCAGCCCACCTTGTTGGGCACAGAGTGCAGGCTCAGGTTTAAGAGCTAAGCTGTAGGAAAGGGATCACCGTTC
TM1	A1	Targeting	C9orf84_+_114557404.23-P1P2	TGCAAGTGTACAAATCCAGCCCACCTTGTTGGACTCCGCCCAGTGTTATGAGTTTAAGAGCTAAGCTGTAGGAAAGGGATCACCGTTC
TM1	A1	Targeting	C9orf84_-_114557336.23-P1P2	TGCAAGTGTACAAATCCAGCCCACCTTGTTGGCGCGAGTGGGCACAGCCTAGTTTAAGAGCTAAGCTGTAGGAAAGGGATCACCGTTC
TM1	A1	Targeting	C9orf84_-_114557344.23-P1P2	TGCAAGTGTACAAATCCAGCCCACCTTGTTGGGGCACAGCCTAGGGAGGTAGTTTAAGAGCTAAGCTGTAGGAAAGGGATCACCGTTC
TM1	A1	Targeting	C9orf84_-_114557353.23-P1P2	TGCAAGTGTACAAATCCAGCCCACCTTGTTGGTAGGGAGGTAAGGATTGTGGTTTAAGAGCTAAGCTGTAGGAAAGGGATCACCGTTC
TM1	A1	Targeting	C9orf84_-_114557361.23-P1P2	TGCAAGTGTACAAATCCAGCCCACCTTGTTGGTAAGGATTGTGGGGATTCGGTTTAAGAGCTAAGCTGTAGGAAAGGGATCACCGTTC
TM1	A1	Targeting	C9orf84_-_114557392.23-P1P2	TGCAAGTGTACAAATCCAGCCCACCTTGTTGGGGGCAGCGCCGAGGTCCTCGTTTAAGAGCTAAGCTGTAGGAAAGGGATCACCGTTC
TM1	A1	Targeting	C9orf84_-_114557422.23-P1P2	TGCAAGTGTACAAATCCAGCCCACCTTGTTGGGAACCCTCATAACACTGGGGTTTAAGAGCTAAGCTGTAGGAAAGGGATCACCGTTC
TM1	A1	Targeting	C9orf84_-_114557432.23-P1P2	TGCAAGTGTACAAATCCAGCCCACCTTGTTGGAACACTGGGCGGAGTGTGAGTTTAAGAGCTAAGCTGTAGGAAAGGGATCACCGTTC
TM1	A1	Targeting	C9orf84_-_114557435.23-P1P2	TGCAAGTGTACAAATCCAGCCCACCTTGTTGGACTGGGCGGAGTGTGACGGGTTTAAGAGCTAAGCTGTAGGAAAGGGATCACCGTTC
TM1	A1	Targeting	C9orf89_+_95858321.23-P1P2	TGCAAGTGTACAAATCCAGCCCACCTTGTTGGCCCCTTGCCGTCCTGGGATGTTTAAGAGCTAAGCTGTAGGAAAGGGATCACCGTTC
TM1	A1	Targeting	C9orf89_+_95858376.23-P1P2	TGCAAGTGTACAAATCCAGCCCACCTTGTTGGGCCCGCTACGGCTCCCCCAGTTTAAGAGCTAAGCTGTAGGAAAGGGATCACCGTTC
TM1	A1	Targeting	C9orf89_-_95858320.23-P1P2	TGCAAGTGTACAAATCCAGCCCACCTTGTTGGGGCTCCAGGATCCTCGCAGGTTTAAGAGCTAAGCTGTAGGAAAGGGATCACCGTTC
TM1	A1	Targeting	C9orf89_-_95858331.23-P1P2	TGCAAGTGTACAAATCCAGCCCACCTTGTTGGCCTCGCAGCGGCCTATCCCGTTTAAGAGCTAAGCTGTAGGAAAGGGATCACCGTTC
TM1	A1	Targeting	C9orf89_-_95858341.23-P1P2	TGCAAGTGTACAAATCCAGCCCACCTTGTTGGGCCTATCCCAGGACGGCAAGTTTAAGAGCTAAGCTGTAGGAAAGGGATCACCGTTC
TM1	A1	Targeting	C9orf89_-_95858363.23-P1P2	TGCAAGTGTACAAATCCAGCCCACCTTGTTGGGGCGGGACTCGAGTGAGAGGTTTAAGAGCTAAGCTGTAGGAAAGGGATCACCGTTC
TM1	A1	Targeting	C9orf89_-_95858366.23-P1P2	TGCAAGTGTACAAATCCAGCCCACCTTGTTGGGGGACTCGAGTGAGAGGGGGTTTAAGAGCTAAGCTGTAGGAAAGGGATCACCGTTC
TM1	A1	Targeting	C9orf89_-_95858384.23-P1P2	TGCAAGTGTACAAATCCAGCCCACCTTGTTGGGCGGAGTTTAGAGCCCTGGGTTTAAGAGCTAAGCTGTAGGAAAGGGATCACCGTTC
TM1	A1	Targeting	C9orf89_-_95858426.23-P1P2	TGCAAGTGTACAAATCCAGCCCACCTTGTTGGGGGCGGGGCCTAACGGTAGGTTTAAGAGCTAAGCTGTAGGAAAGGGATCACCGTTC
TM1	A1	Targeting	C9orf89_-_95858443.23-P1P2	TGCAAGTGTACAAATCCAGCCCACCTTGTTGGAGGGGGCGGGGCTCGTCAAGTTTAAGAGCTAAGCTGTAGGAAAGGGATCACCGTTC
TM1	A1	Targeting	C9orf92_+_16253259.23-ENST00000380683.1	TGCAAGTGTACAAATCCAGCCCACCTTGTTGGGGTCACTGGGTGTCCCCATGTTTAAGAGCTAAGCTGTAGGAAAGGGATCACCGTTC
TM1	A1	Targeting	C9orf92_+_16253279.23-ENST00000380683.1	TGCAAGTGTACAAATCCAGCCCACCTTGTTGGTCACTTCTCAATAAGCCAGGTTTAAGAGCTAAGCTGTAGGAAAGGGATCACCGTTC
TM1	A1	Targeting	C9orf92_+_16253404.23-ENST00000380683.1	TGCAAGTGTACAAATCCAGCCCACCTTGTTGGCCTGCCCCCTGAATAGTCTGTTTAAGAGCTAAGCTGTAGGAAAGGGATCACCGTTC
TM1	A1	Targeting	C9orf92_+_16253519.23-ENST00000380683.1	TGCAAGTGTACAAATCCAGCCCACCTTGTTGGAGCTCTGGGCTGGGACATAGTTTAAGAGCTAAGCTGTAGGAAAGGGATCACCGTTC
TM1	A1	Targeting	C9orf92_+_16253548.23-ENST00000380683.1	TGCAAGTGTACAAATCCAGCCCACCTTGTTGGTCCAGAGGGAGGGTGTTGGGTTTAAGAGCTAAGCTGTAGGAAAGGGATCACCGTTC
TM1	A1	Targeting	C9orf92_+_16276382.23-ENST00000380685.1	TGCAAGTGTACAAATCCAGCCCACCTTGTTGGGCACGGAGTCCTGGCACGGGTTTAAGAGCTAAGCTGTAGGAAAGGGATCACCGTTC
TM1	A1	Targeting	C9orf92_+_16276385.23-ENST00000380685.1	TGCAAGTGTACAAATCCAGCCCACCTTGTTGGTTGGCACGGAGTCCTGGCAGTTTAAGAGCTAAGCTGTAGGAAAGGGATCACCGTTC
TM1	A1	Targeting	C9orf92_+_16276390.23-ENST00000380685.1	TGCAAGTGTACAAATCCAGCCCACCTTGTTGGCGGCTTTGGCACGGAGTCCGTTTAAGAGCTAAGCTGTAGGAAAGGGATCACCGTTC
TM1	A1	Targeting	C9orf92_+_16276460.23-ENST00000380685.1	TGCAAGTGTACAAATCCAGCCCACCTTGTTGGTCTACGCTTGGTTGGTGCCGTTTAAGAGCTAAGCTGTAGGAAAGGGATCACCGTTC
TM1	A1	Targeting	C9orf92_+_16276490.23-ENST00000380685.1	TGCAAGTGTACAAATCCAGCCCACCTTGTTGGTCGGGAGGCTGTATCACAAGTTTAAGAGCTAAGCTGTAGGAAAGGGATCACCGTTC
TM1	A1	Targeting	C9orf92_+_16276538.23-ENST00000380685.1	TGCAAGTGTACAAATCCAGCCCACCTTGTTGGGATTGGGGTCTCTGGTCTCGTTTAAGAGCTAAGCTGTAGGAAAGGGATCACCGTTC
TM1	A1	Targeting	C9orf92_+_16276690.23-ENST00000380685.1	TGCAAGTGTACAAATCCAGCCCACCTTGTTGGCTAAATTATGGAATTAAGAGTTTAAGAGCTAAGCTGTAGGAAAGGGATCACCGTTC
TM1	A1	Targeting	C9orf92_+_16276768.23-ENST00000380685.1	TGCAAGTGTACAAATCCAGCCCACCTTGTTGGTGGGACATCAGATGCAACTGTTTAAGAGCTAAGCTGTAGGAAAGGGATCACCGTTC
TM1	A1	Targeting	C9orf92_-_16253223.23-ENST00000380683.1	TGCAAGTGTACAAATCCAGCCCACCTTGTTGGTTACTCCCTGGTAAATCAGGTTTAAGAGCTAAGCTGTAGGAAAGGGATCACCGTTC
TM1	A1	Targeting	C9orf92_-_16253266.23-ENST00000380683.1	TGCAAGTGTACAAATCCAGCCCACCTTGTTGGTTGGCTTAAGTCACCCTATGTTTAAGAGCTAAGCTGTAGGAAAGGGATCACCGTTC
TM1	A1	Targeting	C9orf92_-_16253285.23-ENST00000380683.1	TGCAAGTGTACAAATCCAGCCCACCTTGTTGGGGGGACACCCAGTGACCTCGTTTAAGAGCTAAGCTGTAGGAAAGGGATCACCGTTC
TM1	A1	Targeting	C9orf92_-_16253420.23-ENST00000380683.1	TGCAAGTGTACAAATCCAGCCCACCTTGTTGGTTAATCCCAGACTATTCAGGTTTAAGAGCTAAGCTGTAGGAAAGGGATCACCGTTC
TM1	A1	Targeting	C9orf92_-_16253649.23-ENST00000380683.1	TGCAAGTGTACAAATCCAGCCCACCTTGTTGGTCAGGGGAGAAGGAACCTGGTTTAAGAGCTAAGCTGTAGGAAAGGGATCACCGTTC
TM1	A1	Targeting	C9orf92_-_16276426.23-ENST00000380685.1	TGCAAGTGTACAAATCCAGCCCACCTTGTTGGAAAGCCGCCCACACAAGCAGTTTAAGAGCTAAGCTGTAGGAAAGGGATCACCGTTC
TM1	A1	Targeting	C9orf92_-_16276445.23-ENST00000380685.1	TGCAAGTGTACAAATCCAGCCCACCTTGTTGGAGGCTCGCCCTGCATGCCAGTTTAAGAGCTAAGCTGTAGGAAAGGGATCACCGTTC
TM1	A1	Targeting	CABLES2_+_60982453.23-P1P2	TGCAAGTGTACAAATCCAGCCCACCTTGTTGGCCTGAGCGCGGCACCTCGCGTTTAAGAGCTAAGCTGTAGGAAAGGGATCACCGTTC
TM1	A1	Targeting	CABLES2_+_60982481.23-P1P2	TGCAAGTGTACAAATCCAGCCCACCTTGTTGGCGACCGCCTCTAGGACCCAGTTTAAGAGCTAAGCTGTAGGAAAGGGATCACCGTTC
TM1	A1	Targeting	CABLES2_+_60982537.23-P1P2	TGCAAGTGTACAAATCCAGCCCACCTTGTTGGACGGGGACTCGAACCGGCGGTTTAAGAGCTAAGCTGTAGGAAAGGGATCACCGTTC
TM1	A1	Targeting	CABLES2_+_60982542.23-P1P2	TGCAAGTGTACAAATCCAGCCCACCTTGTTGGCCAAGACGGGGACTCGAACGTTTAAGAGCTAAGCTGTAGGAAAGGGATCACCGTTC
TM1	A1	Targeting	CABLES2_+_60982553.23-P1P2	TGCAAGTGTACAAATCCAGCCCACCTTGTTGGGGCCGCAGGTCCCAAGACGGTTTAAGAGCTAAGCTGTAGGAAAGGGATCACCGTTC
TM1	A1	Targeting	CABLES2_+_60982596.23-P1P2	TGCAAGTGTACAAATCCAGCCCACCTTGTTGGAAGGCCGCCATACAGCAAAGTTTAAGAGCTAAGCTGTAGGAAAGGGATCACCGTTC
TM1	A1	Targeting	CABLES2_+_60982614.23-P1P2	TGCAAGTGTACAAATCCAGCCCACCTTGTTGGCGATGGAGGCCATCCGCGAGTTTAAGAGCTAAGCTGTAGGAAAGGGATCACCGTTC
TM1	A1	Targeting	CABLES2_-_60982496.23-P1P2	TGCAAGTGTACAAATCCAGCCCACCTTGTTGGGCGCTCCCCTGGGTCCTAGGTTTAAGAGCTAAGCTGTAGGAAAGGGATCACCGTTC
TM1	A1	Targeting	CABLES2_-_60982499.23-P1P2	TGCAAGTGTACAAATCCAGCCCACCTTGTTGGCTCCCCTGGGTCCTAGAGGGTTTAAGAGCTAAGCTGTAGGAAAGGGATCACCGTTC
TM1	A1	Targeting	CABLES2_-_60982517.23-P1P2	TGCAAGTGTACAAATCCAGCCCACCTTGTTGGGCGGTCGGACGCAGCAGCAGTTTAAGAGCTAAGCTGTAGGAAAGGGATCACCGTTC
TM1	A1	Targeting	CABP7_+_30115850.23-P1P2	TGCAAGTGTACAAATCCAGCCCACCTTGTTGGCGGGGCTCCTTCTCCCCTTGTTTAAGAGCTAAGCTGTAGGAAAGGGATCACCGTTC
TM1	A1	Targeting	CABP7_+_30115869.23-P1P2	TGCAAGTGTACAAATCCAGCCCACCTTGTTGGCGGCCGCCCCAAACCTGCCGTTTAAGAGCTAAGCTGTAGGAAAGGGATCACCGTTC
TM1	A1	Targeting	CABP7_-_30115672.23-P1P2	TGCAAGTGTACAAATCCAGCCCACCTTGTTGGGGGCCAGTCTCACCTCTCTGTTTAAGAGCTAAGCTGTAGGAAAGGGATCACCGTTC
TM1	A1	Targeting	CABP7_-_30115718.23-P1P2	TGCAAGTGTACAAATCCAGCCCACCTTGTTGGTCCGCTCCTGGTGCGTGGAGTTTAAGAGCTAAGCTGTAGGAAAGGGATCACCGTTC
TM1	A1	Targeting	CABP7_-_30115797.23-P1P2	TGCAAGTGTACAAATCCAGCCCACCTTGTTGGCCTGGTGGCTGCAGACTTAGTTTAAGAGCTAAGCTGTAGGAAAGGGATCACCGTTC
TM1	A1	Targeting	CABP7_-_30115833.23-P1P2	TGCAAGTGTACAAATCCAGCCCACCTTGTTGGGAACAGAGGGGAGCCCTAGGTTTAAGAGCTAAGCTGTAGGAAAGGGATCACCGTTC
TM1	A1	Targeting	CABP7_-_30115839.23-P1P2	TGCAAGTGTACAAATCCAGCCCACCTTGTTGGAGGGGAGCCCTAGTGGGAAGTTTAAGAGCTAAGCTGTAGGAAAGGGATCACCGTTC
TM1	A1	Targeting	CABP7_-_30115847.23-P1P2	TGCAAGTGTACAAATCCAGCCCACCTTGTTGGCCTAGTGGGAAAGGGGAATGTTTAAGAGCTAAGCTGTAGGAAAGGGATCACCGTTC
TM1	A1	Targeting	CABP7_-_30115858.23-P1P2	TGCAAGTGTACAAATCCAGCCCACCTTGTTGGAGGGGAATCGGGGCCGAAGGTTTAAGAGCTAAGCTGTAGGAAAGGGATCACCGTTC
TM1	A1	Targeting	CABP7_-_30115882.23-P1P2	TGCAAGTGTACAAATCCAGCCCACCTTGTTGGAAGGAGCCCCGGGCAGGTTGTTTAAGAGCTAAGCTGTAGGAAAGGGATCACCGTTC
TM1	A1	Targeting	CACHD1_+_64935748.23-P1P2	TGCAAGTGTACAAATCCAGCCCACCTTGTTGGAGAGGCGGGGAAATTCCCCGTTTAAGAGCTAAGCTGTAGGAAAGGGATCACCGTTC
TM1	A1	Targeting	CACHD1_+_64935760.23-P1P2	TGCAAGTGTACAAATCCAGCCCACCTTGTTGGGGAACCAGCAAGAGAGGCGGTTTAAGAGCTAAGCTGTAGGAAAGGGATCACCGTTC
TM1	A1	Targeting	CACHD1_+_64935780.23-P1P2	TGCAAGTGTACAAATCCAGCCCACCTTGTTGGCGGCGGCTGCGGTGATTTAGTTTAAGAGCTAAGCTGTAGGAAAGGGATCACCGTTC
TM1	A1	Targeting	CACHD1_+_64935796.23-P1P2	TGCAAGTGTACAAATCCAGCCCACCTTGTTGGCCCGGCTGGGCCGCCGCGGGTTTAAGAGCTAAGCTGTAGGAAAGGGATCACCGTTC
TM1	A1	Targeting	CACHD1_+_64935830.23-P1P2	TGCAAGTGTACAAATCCAGCCCACCTTGTTGGGTGCCACCACGCTGCGCTCGTTTAAGAGCTAAGCTGTAGGAAAGGGATCACCGTTC
TM1	A1	Targeting	CACHD1_-_64935561.23-P1P2	TGCAAGTGTACAAATCCAGCCCACCTTGTTGGGCTGGAACCTGGGCCGGGTGTTTAAGAGCTAAGCTGTAGGAAAGGGATCACCGTTC
TM1	A1	Targeting	CACHD1_-_64935599.23-P1P2	TGCAAGTGTACAAATCCAGCCCACCTTGTTGGGAGGCGGGGAGCGCTGGCGGTTTAAGAGCTAAGCTGTAGGAAAGGGATCACCGTTC
TM1	A1	Targeting	CACHD1_-_64935632.23-P1P2	TGCAAGTGTACAAATCCAGCCCACCTTGTTGGCAGCCACGGGAAGGTCCGTGTTTAAGAGCTAAGCTGTAGGAAAGGGATCACCGTTC
TM1	A1	Targeting	CACHD1_-_64935675.23-P1P2	TGCAAGTGTACAAATCCAGCCCACCTTGTTGGGGTCCCCGAGCAGAGAGAGGTTTAAGAGCTAAGCTGTAGGAAAGGGATCACCGTTC
TM1	A1	Targeting	CACHD1_-_64935752.23-P1P2	TGCAAGTGTACAAATCCAGCCCACCTTGTTGGAGAGAGAGGAGGGGCAACCGTTTAAGAGCTAAGCTGTAGGAAAGGGATCACCGTTC
TM1	A1	Targeting	CADM1_+_115375215.23-P1P2	TGCAAGTGTACAAATCCAGCCCACCTTGTTGGGGGCTCGCGGCGCTGTGATGTTTAAGAGCTAAGCTGTAGGAAAGGGATCACCGTTC
TM1	A1	Targeting	CADM1_+_115375234.23-P1P2	TGCAAGTGTACAAATCCAGCCCACCTTGTTGGGCCCTCCGAGAGCCGGGTTGTTTAAGAGCTAAGCTGTAGGAAAGGGATCACCGTTC
TM1	A1	Targeting	CADM1_+_115375240.23-P1P2	TGCAAGTGTACAAATCCAGCCCACCTTGTTGGAGCGAGGCCCTCCGAGAGCGTTTAAGAGCTAAGCTGTAGGAAAGGGATCACCGTTC
TM1	A1	Targeting	CADM1_+_115375521.23-P1P2	TGCAAGTGTACAAATCCAGCCCACCTTGTTGGGGACAGAGGACCCTCTTAAGTTTAAGAGCTAAGCTGTAGGAAAGGGATCACCGTTC
TM1	A1	Targeting	CADM1_-_115375253.23-P1P2	TGCAAGTGTACAAATCCAGCCCACCTTGTTGGAGCCCAACCCGGCTCTCGGGTTTAAGAGCTAAGCTGTAGGAAAGGGATCACCGTTC
TM1	A1	Targeting	CADM1_-_115375297.23-P1P2	TGCAAGTGTACAAATCCAGCCCACCTTGTTGGGCCCCCTGGCGCTGGCGTTGTTTAAGAGCTAAGCTGTAGGAAAGGGATCACCGTTC
TM1	A1	Targeting	CADM1_-_115375300.23-P1P2	TGCAAGTGTACAAATCCAGCCCACCTTGTTGGCCCTGGCGCTGGCGTTCGGGTTTAAGAGCTAAGCTGTAGGAAAGGGATCACCGTTC
TM1	A1	Targeting	CADM1_-_115375321.23-P1P2	TGCAAGTGTACAAATCCAGCCCACCTTGTTGGGCGCGCCCGCGCCACCTAGGTTTAAGAGCTAAGCTGTAGGAAAGGGATCACCGTTC
TM1	A1	Targeting	CADM1_-_115375324.23-P1P2	TGCAAGTGTACAAATCCAGCCCACCTTGTTGGCGCCCGCGCCACCTAGGGGGTTTAAGAGCTAAGCTGTAGGAAAGGGATCACCGTTC
TM1	A1	Targeting	CADM1_-_115375434.23-P1P2	TGCAAGTGTACAAATCCAGCCCACCTTGTTGGGCCTGGCGTGCAAGGACTCGTTTAAGAGCTAAGCTGTAGGAAAGGGATCACCGTTC
TM1	A1	Targeting	CADM2_+_85007606.23-P1P2	TGCAAGTGTACAAATCCAGCCCACCTTGTTGGGTGGGAGAGGCTAAGTATAGTTTAAGAGCTAAGCTGTAGGAAAGGGATCACCGTTC
TM1	A1	Targeting	CADM2_+_85007990.23-P1P2	TGCAAGTGTACAAATCCAGCCCACCTTGTTGGGATGGGTGGAGACAAGCGCGTTTAAGAGCTAAGCTGTAGGAAAGGGATCACCGTTC
TM1	A1	Targeting	CADM2_+_85008006.23-P1P2	TGCAAGTGTACAAATCCAGCCCACCTTGTTGGGCCAATGAGAGAAGGGGATGTTTAAGAGCTAAGCTGTAGGAAAGGGATCACCGTTC
TM1	A1	Targeting	CADM2_+_85008027.23-P1P2	TGCAAGTGTACAAATCCAGCCCACCTTGTTGGCTCCCCCGCCCACCAGGTCGTTTAAGAGCTAAGCTGTAGGAAAGGGATCACCGTTC
TM1	A1	Targeting	CADM2_+_85008032.23-P1P2	TGCAAGTGTACAAATCCAGCCCACCTTGTTGGGGAAACTCCCCCGCCCACCGTTTAAGAGCTAAGCTGTAGGAAAGGGATCACCGTTC
TM1	A1	Targeting	CADM2_+_85008100.23-P1P2	TGCAAGTGTACAAATCCAGCCCACCTTGTTGGGGCAAGCTCAGAGCGGCGGGTTTAAGAGCTAAGCTGTAGGAAAGGGATCACCGTTC
TM1	A1	Targeting	CADM2_+_85008103.23-P1P2	TGCAAGTGTACAAATCCAGCCCACCTTGTTGGAAGGGCAAGCTCAGAGCGGGTTTAAGAGCTAAGCTGTAGGAAAGGGATCACCGTTC
TM1	A1	Targeting	CADM2_+_85008106.23-P1P2	TGCAAGTGTACAAATCCAGCCCACCTTGTTGGCACAAGGGCAAGCTCAGAGGTTTAAGAGCTAAGCTGTAGGAAAGGGATCACCGTTC
TM1	A1	Targeting	CADM2_-_85007940.23-P1P2	TGCAAGTGTACAAATCCAGCCCACCTTGTTGGCGCCAGGGGTGCTGAATGGGTTTAAGAGCTAAGCTGTAGGAAAGGGATCACCGTTC
TM1	A1	Targeting	CADM2_-_85008064.23-P1P2	TGCAAGTGTACAAATCCAGCCCACCTTGTTGGGGGGAGTTTCCATTGGCCGGTTTAAGAGCTAAGCTGTAGGAAAGGGATCACCGTTC
TM1	A1	Targeting	CADM3_+_159141111.23-P1P2	TGCAAGTGTACAAATCCAGCCCACCTTGTTGGGGAGGGAGGGGAGTCGGACGTTTAAGAGCTAAGCTGTAGGAAAGGGATCACCGTTC
TM1	A1	Targeting	CADM3_+_159141134.23-P1P2	TGCAAGTGTACAAATCCAGCCCACCTTGTTGGCTCACCCCTCTTAGGCTTGGTTTAAGAGCTAAGCTGTAGGAAAGGGATCACCGTTC
TM1	A1	Targeting	CADM3_+_159141215.23-P1P2	TGCAAGTGTACAAATCCAGCCCACCTTGTTGGACCCTCTCCCCCGGGAGCTGTTTAAGAGCTAAGCTGTAGGAAAGGGATCACCGTTC
TM1	A1	Targeting	CADM3_-_159140984.23-P1P2	TGCAAGTGTACAAATCCAGCCCACCTTGTTGGTCCCTGGGTACATGGTTGGGTTTAAGAGCTAAGCTGTAGGAAAGGGATCACCGTTC
TM1	A1	Targeting	CADM3_-_159141162.23-P1P2	TGCAAGTGTACAAATCCAGCCCACCTTGTTGGCCTAAGAGGGGTGAGCGCAGTTTAAGAGCTAAGCTGTAGGAAAGGGATCACCGTTC
TM1	A1	Targeting	CADM3_-_159141228.23-P1P2	TGCAAGTGTACAAATCCAGCCCACCTTGTTGGCCGGCTGGCCGAGCTCCCGGTTTAAGAGCTAAGCTGTAGGAAAGGGATCACCGTTC
TM1	A1	Targeting	CADM3_-_159141235.23-P1P2	TGCAAGTGTACAAATCCAGCCCACCTTGTTGGGCCGAGCTCCCGGGGGAGAGTTTAAGAGCTAAGCTGTAGGAAAGGGATCACCGTTC
TM1	A1	Targeting	CADM3_-_159141253.23-P1P2	TGCAAGTGTACAAATCCAGCCCACCTTGTTGGAGGGTGGAAGGCACCACGAGTTTAAGAGCTAAGCTGTAGGAAAGGGATCACCGTTC
TM1	A1	Targeting	CADM3_-_159141261.23-P1P2	TGCAAGTGTACAAATCCAGCCCACCTTGTTGGAGGCACCACGAAGGCAAGGGTTTAAGAGCTAAGCTGTAGGAAAGGGATCACCGTTC
TM1	A1	Targeting	CADM3_-_159141264.23-P1P2	TGCAAGTGTACAAATCCAGCCCACCTTGTTGGCACCACGAAGGCAAGGAGGGTTTAAGAGCTAAGCTGTAGGAAAGGGATCACCGTTC
TM1	A1	Targeting	CADM4_+_44144101.23-P1P2	TGCAAGTGTACAAATCCAGCCCACCTTGTTGGCCGTCCCCCCGATTGTCTCGTTTAAGAGCTAAGCTGTAGGAAAGGGATCACCGTTC
TM1	A1	Targeting	CADM4_-_44144115.23-P1P2	TGCAAGTGTACAAATCCAGCCCACCTTGTTGGGAGAGGCCCGGAGACAATCGTTTAAGAGCTAAGCTGTAGGAAAGGGATCACCGTTC
TM1	A1	Targeting	CADM4_-_44144118.23-P1P2	TGCAAGTGTACAAATCCAGCCCACCTTGTTGGAGGCCCGGAGACAATCGGGGTTTAAGAGCTAAGCTGTAGGAAAGGGATCACCGTTC
TM1	A1	Targeting	CADM4_-_44144143.23-P1P2	TGCAAGTGTACAAATCCAGCCCACCTTGTTGGGCACGGTGGGGGAACGGTGGTTTAAGAGCTAAGCTGTAGGAAAGGGATCACCGTTC
TM1	A1	Targeting	CADM4_-_44144196.23-P1P2	TGCAAGTGTACAAATCCAGCCCACCTTGTTGGAGGGCGGGAAGGGGTGCGCGTTTAAGAGCTAAGCTGTAGGAAAGGGATCACCGTTC
TM1	A1	Targeting	CADM4_-_44144209.23-P1P2	TGCAAGTGTACAAATCCAGCCCACCTTGTTGGGTGCGCGGGAGGGCGACAGGTTTAAGAGCTAAGCTGTAGGAAAGGGATCACCGTTC
TM1	A1	Targeting	CADM4_-_44144215.23-P1P2	TGCAAGTGTACAAATCCAGCCCACCTTGTTGGGGGAGGGCGACAGCGGCGTGTTTAAGAGCTAAGCTGTAGGAAAGGGATCACCGTTC
TM1	A1	Targeting	CADM4_-_44144254.23-P1P2	TGCAAGTGTACAAATCCAGCCCACCTTGTTGGGGTGAGCGCGGGAAATGGAGTTTAAGAGCTAAGCTGTAGGAAAGGGATCACCGTTC
TM1	A1	Targeting	CADM4_-_44144471.23-P1P2	TGCAAGTGTACAAATCCAGCCCACCTTGTTGGAAGGGAGGGAGTGCGACGTGTTTAAGAGCTAAGCTGTAGGAAAGGGATCACCGTTC
TM1	A1	Targeting	CADM4_-_44144476.23-P1P2	TGCAAGTGTACAAATCCAGCCCACCTTGTTGGAGGGAGTGCGACGTGGGAAGTTTAAGAGCTAAGCTGTAGGAAAGGGATCACCGTTC
TM1	A1	Targeting	CALN1_+_71802501.23-P1	TGCAAGTGTACAAATCCAGCCCACCTTGTTGGTGGGCAGCCTCTTTGGGAAGTTTAAGAGCTAAGCTGTAGGAAAGGGATCACCGTTC
TM1	A1	Targeting	CALN1_+_71802507.23-P1	TGCAAGTGTACAAATCCAGCCCACCTTGTTGGTTAACGTGGGCAGCCTCTTGTTTAAGAGCTAAGCTGTAGGAAAGGGATCACCGTTC
TM1	A1	Targeting	CALN1_+_71802611.23-P1	TGCAAGTGTACAAATCCAGCCCACCTTGTTGGAGGTGTAATCGTGGATCTAGTTTAAGAGCTAAGCTGTAGGAAAGGGATCACCGTTC
TM1	A1	Targeting	CALN1_+_71912209.23-P2	TGCAAGTGTACAAATCCAGCCCACCTTGTTGGCACTGGCACCCTTCAAATTGTTTAAGAGCTAAGCTGTAGGAAAGGGATCACCGTTC
TM1	A1	Targeting	CALN1_+_71912406.23-P2	TGCAAGTGTACAAATCCAGCCCACCTTGTTGGCCTAGGGTAGGCAGTGCGTGTTTAAGAGCTAAGCTGTAGGAAAGGGATCACCGTTC
TM1	A1	Targeting	CALN1_+_71912421.23-P2	TGCAAGTGTACAAATCCAGCCCACCTTGTTGGAGGACCTTGGTACTTCCTAGTTTAAGAGCTAAGCTGTAGGAAAGGGATCACCGTTC
TM1	A1	Targeting	CALN1_-_71802465.23-P1	TGCAAGTGTACAAATCCAGCCCACCTTGTTGGCACACAGGCAGACACGCGGGTTTAAGAGCTAAGCTGTAGGAAAGGGATCACCGTTC
TM1	A1	Targeting	CALN1_-_71802488.23-P1	TGCAAGTGTACAAATCCAGCCCACCTTGTTGGCGAGCAGGCGCTTGGCAGAGTTTAAGAGCTAAGCTGTAGGAAAGGGATCACCGTTC
TM1	A1	Targeting	CALN1_-_71802534.23-P1	TGCAAGTGTACAAATCCAGCCCACCTTGTTGGAGGCTGCCCACGTTAACTCGTTTAAGAGCTAAGCTGTAGGAAAGGGATCACCGTTC
TM1	A1	Targeting	CALN1_-_71802558.23-P1	TGCAAGTGTACAAATCCAGCCCACCTTGTTGGAACTGCTGCTCCTCAGCACGTTTAAGAGCTAAGCTGTAGGAAAGGGATCACCGTTC
TM1	A1	Targeting	CALN1_-_71802602.23-P1	TGCAAGTGTACAAATCCAGCCCACCTTGTTGGGCCTTCACTACTTCATCCCGTTTAAGAGCTAAGCTGTAGGAAAGGGATCACCGTTC
TM1	A1	Targeting	CALN1_-_71802664.23-P1	TGCAAGTGTACAAATCCAGCCCACCTTGTTGGGGAAGGCGGGGCGCCGAAGGTTTAAGAGCTAAGCTGTAGGAAAGGGATCACCGTTC
TM1	A1	Targeting	CALN1_-_71802669.23-P1	TGCAAGTGTACAAATCCAGCCCACCTTGTTGGGCGGGGCGCCGAAGTGGAGGTTTAAGAGCTAAGCTGTAGGAAAGGGATCACCGTTC
TM1	A1	Targeting	CALN1_-_71912222.23-P2	TGCAAGTGTACAAATCCAGCCCACCTTGTTGGGCTAGAGTCCCAATTTGAAGTTTAAGAGCTAAGCTGTAGGAAAGGGATCACCGTTC
TM1	A1	Targeting	CALN1_-_71912263.23-P2	TGCAAGTGTACAAATCCAGCCCACCTTGTTGGGCTGCTGCCGTGTCTGCTCGTTTAAGAGCTAAGCTGTAGGAAAGGGATCACCGTTC
TM1	A1	Targeting	CALN1_-_71912324.23-P2	TGCAAGTGTACAAATCCAGCCCACCTTGTTGGTCACTCCAGCAAGAAAACGGTTTAAGAGCTAAGCTGTAGGAAAGGGATCACCGTTC
TM1	A1	Targeting	CALN1_-_71912333.23-P2	TGCAAGTGTACAAATCCAGCCCACCTTGTTGGCAAGAAAACGGGGCTGAGAGTTTAAGAGCTAAGCTGTAGGAAAGGGATCACCGTTC
TM1	A1	Targeting	CALN1_-_71912359.23-P2	TGCAAGTGTACAAATCCAGCCCACCTTGTTGGAAAGTGCCCCCAGAAACACGTTTAAGAGCTAAGCTGTAGGAAAGGGATCACCGTTC
TM1	A1	Targeting	CALN1_-_71912488.23-P2	TGCAAGTGTACAAATCCAGCCCACCTTGTTGGAAAGAGCGGGGCTCCGTGGGTTTAAGAGCTAAGCTGTAGGAAAGGGATCACCGTTC
TM1	A1	Targeting	CALN1_-_71912554.23-P2	TGCAAGTGTACAAATCCAGCCCACCTTGTTGGGACACTGCCTGGGGAAAGTGTTTAAGAGCTAAGCTGTAGGAAAGGGATCACCGTTC
TM1	A1	Targeting	CALY_+_135139854.23-P2	TGCAAGTGTACAAATCCAGCCCACCTTGTTGGCTGCGCTGGGCAGGTCCACGTTTAAGAGCTAAGCTGTAGGAAAGGGATCACCGTTC
TM1	A1	Targeting	CALY_+_135139898.23-P2	TGCAAGTGTACAAATCCAGCCCACCTTGTTGGAACTCCATGGTTTATGCTCGTTTAAGAGCTAAGCTGTAGGAAAGGGATCACCGTTC
TM1	A1	Targeting	CALY_+_135140117.23-P2	TGCAAGTGTACAAATCCAGCCCACCTTGTTGGCCCTGCAGCCACCTCTCTAGTTTAAGAGCTAAGCTGTAGGAAAGGGATCACCGTTC
TM1	A1	Targeting	CALY_+_135150501.23-P1	TGCAAGTGTACAAATCCAGCCCACCTTGTTGGGGGTGCGGGACCAGAGTCGGTTTAAGAGCTAAGCTGTAGGAAAGGGATCACCGTTC
TM1	A1	Targeting	CALY_+_135150533.23-P1	TGCAAGTGTACAAATCCAGCCCACCTTGTTGGGCTCCCTAGCCGGGGCGGTGTTTAAGAGCTAAGCTGTAGGAAAGGGATCACCGTTC
TM1	A1	Targeting	CALY_+_135150537.23-P1	TGCAAGTGTACAAATCCAGCCCACCTTGTTGGCGCGGCTCCCTAGCCGGGGGTTTAAGAGCTAAGCTGTAGGAAAGGGATCACCGTTC
TM1	A1	Targeting	CALY_+_135150541.23-P1	TGCAAGTGTACAAATCCAGCCCACCTTGTTGGCATGCGCGGCTCCCTAGCCGTTTAAGAGCTAAGCTGTAGGAAAGGGATCACCGTTC
TM1	A1	Targeting	CALY_+_135150610.23-P1	TGCAAGTGTACAAATCCAGCCCACCTTGTTGGTGTCAGGTGTGTGTGCATCGTTTAAGAGCTAAGCTGTAGGAAAGGGATCACCGTTC
TM1	A1	Targeting	CALY_+_135150649.23-P1	TGCAAGTGTACAAATCCAGCCCACCTTGTTGGTGGATGTGTCTGGTGTTCGGTTTAAGAGCTAAGCTGTAGGAAAGGGATCACCGTTC
TM1	A1	Targeting	CALY_-_135139822.23-P2	TGCAAGTGTACAAATCCAGCCCACCTTGTTGGAGGAGGTCGCGCGTTGTAAGTTTAAGAGCTAAGCTGTAGGAAAGGGATCACCGTTC
TM1	A1	Targeting	CALY_-_135139827.23-P2	TGCAAGTGTACAAATCCAGCCCACCTTGTTGGGTCGCGCGTTGTAAGGGGAGTTTAAGAGCTAAGCTGTAGGAAAGGGATCACCGTTC
TM1	A1	Targeting	CALY_-_135139837.23-P2	TGCAAGTGTACAAATCCAGCCCACCTTGTTGGGTAAGGGGAGGGGCCACCCGTTTAAGAGCTAAGCTGTAGGAAAGGGATCACCGTTC
TM1	A1	Targeting	CALY_-_135139860.23-P2	TGCAAGTGTACAAATCCAGCCCACCTTGTTGGAGAGGGGCGCAGACACCAGGTTTAAGAGCTAAGCTGTAGGAAAGGGATCACCGTTC
TM1	A1	Targeting	CALY_-_135139880.23-P2	TGCAAGTGTACAAATCCAGCCCACCTTGTTGGGGACCTGCCCAGCGCAGCAGTTTAAGAGCTAAGCTGTAGGAAAGGGATCACCGTTC
TM1	A1	Targeting	CALY_-_135139889.23-P2	TGCAAGTGTACAAATCCAGCCCACCTTGTTGGCAGCGCAGCAAGGACTCTGGTTTAAGAGCTAAGCTGTAGGAAAGGGATCACCGTTC
TM1	A1	Targeting	CALY_-_135140333.23-P2	TGCAAGTGTACAAATCCAGCCCACCTTGTTGGACCCCCTGCCTGGAGGCTAGTTTAAGAGCTAAGCTGTAGGAAAGGGATCACCGTTC
TM1	A1	Targeting	CALY_-_135150465.23-P1	TGCAAGTGTACAAATCCAGCCCACCTTGTTGGGGCTGCAGCTGCGAGACCGGTTTAAGAGCTAAGCTGTAGGAAAGGGATCACCGTTC
TM1	A1	Targeting	CALY_-_135150500.23-P1	TGCAAGTGTACAAATCCAGCCCACCTTGTTGGGGAAACGCGGCTAGAGGCGGTTTAAGAGCTAAGCTGTAGGAAAGGGATCACCGTTC
TM1	A1	Targeting	CALY_-_135150512.23-P1	TGCAAGTGTACAAATCCAGCCCACCTTGTTGGAGAGGCGGGGCCTCGACTCGTTTAAGAGCTAAGCTGTAGGAAAGGGATCACCGTTC
TM1	A1	Targeting	CALY_-_135150551.23-P1	TGCAAGTGTACAAATCCAGCCCACCTTGTTGGCCACCCACCGCCCCGGCTAGTTTAAGAGCTAAGCTGTAGGAAAGGGATCACCGTTC
TM1	A1	Targeting	CANX_+_179125778.23-P1	TGCAAGTGTACAAATCCAGCCCACCTTGTTGGCTTCGTGGAGTGTGAAGATGTTTAAGAGCTAAGCTGTAGGAAAGGGATCACCGTTC
TM1	A1	Targeting	CANX_+_179125792.23-P1	TGCAAGTGTACAAATCCAGCCCACCTTGTTGGCCCCTACGGCTATTCTTCGGTTTAAGAGCTAAGCTGTAGGAAAGGGATCACCGTTC
TM1	A1	Targeting	CANX_+_179125851.23-P1	TGCAAGTGTACAAATCCAGCCCACCTTGTTGGGCAAGCCCCGACATCCGGTGTTTAAGAGCTAAGCTGTAGGAAAGGGATCACCGTTC
TM1	A1	Targeting	CANX_+_179125855.23-P1	TGCAAGTGTACAAATCCAGCCCACCTTGTTGGCCGCGCAAGCCCCGACATCGTTTAAGAGCTAAGCTGTAGGAAAGGGATCACCGTTC
TM1	A1	Targeting	CANX_+_179132133.23-P2	TGCAAGTGTACAAATCCAGCCCACCTTGTTGGAATTAGCTGGGAGCGATAGGTTTAAGAGCTAAGCTGTAGGAAAGGGATCACCGTTC
TM1	A1	Targeting	CANX_+_179132318.23-P2	TGCAAGTGTACAAATCCAGCCCACCTTGTTGGTCATACACTAATTTACAGGGTTTAAGAGCTAAGCTGTAGGAAAGGGATCACCGTTC
TM1	A1	Targeting	CANX_+_179132408.23-P2	TGCAAGTGTACAAATCCAGCCCACCTTGTTGGAGGATTGGTTACACAGATGGTTTAAGAGCTAAGCTGTAGGAAAGGGATCACCGTTC
TM1	A1	Targeting	CANX_+_179132422.23-P2	TGCAAGTGTACAAATCCAGCCCACCTTGTTGGATCCTCATATAGAGAGGATGTTTAAGAGCTAAGCTGTAGGAAAGGGATCACCGTTC
TM1	A1	Targeting	CANX_+_179132477.23-P2	TGCAAGTGTACAAATCCAGCCCACCTTGTTGGAGTTAAAAGATTCCATTTCGTTTAAGAGCTAAGCTGTAGGAAAGGGATCACCGTTC
TM1	A1	Targeting	CANX_-_179125562.23-P1	TGCAAGTGTACAAATCCAGCCCACCTTGTTGGCGTTTGCCCCGTCAGCGAAGTTTAAGAGCTAAGCTGTAGGAAAGGGATCACCGTTC
TM1	A1	Targeting	CANX_-_179125821.23-P1	TGCAAGTGTACAAATCCAGCCCACCTTGTTGGAATAGCCGTAGGGGGCGTAGTTTAAGAGCTAAGCTGTAGGAAAGGGATCACCGTTC
TM1	A1	Targeting	CANX_-_179125826.23-P1	TGCAAGTGTACAAATCCAGCCCACCTTGTTGGCCGTAGGGGGCGTATGGGAGTTTAAGAGCTAAGCTGTAGGAAAGGGATCACCGTTC
TM1	A1	Targeting	CANX_-_179125858.23-P1	TGCAAGTGTACAAATCCAGCCCACCTTGTTGGGATGCCCACGCCGGCCAACGTTTAAGAGCTAAGCTGTAGGAAAGGGATCACCGTTC
TM1	A1	Targeting	CANX_-_179125867.23-P1	TGCAAGTGTACAAATCCAGCCCACCTTGTTGGGCCGGCCAACCGGATGTCGGTTTAAGAGCTAAGCTGTAGGAAAGGGATCACCGTTC
TM1	A1	Targeting	CANX_-_179125897.23-P1	TGCAAGTGTACAAATCCAGCCCACCTTGTTGGGGAGGGCGGGACTTGGCGCGTTTAAGAGCTAAGCTGTAGGAAAGGGATCACCGTTC
TM1	A1	Targeting	CANX_-_179132344.23-P2	TGCAAGTGTACAAATCCAGCCCACCTTGTTGGTGTAAATTAGTGTATGAAAGTTTAAGAGCTAAGCTGTAGGAAAGGGATCACCGTTC
TM1	A1	Targeting	CANX_-_179132441.23-P2	TGCAAGTGTACAAATCCAGCCCACCTTGTTGGAACCAATCCTCTCTATATGGTTTAAGAGCTAAGCTGTAGGAAAGGGATCACCGTTC
TM1	A1	Targeting	CANX_-_179132640.23-P2	TGCAAGTGTACAAATCCAGCCCACCTTGTTGGGATCTTCATGAAGTTTGATGTTTAAGAGCTAAGCTGTAGGAAAGGGATCACCGTTC
TM1	A1	Targeting	CANX_-_179132685.23-P2	TGCAAGTGTACAAATCCAGCCCACCTTGTTGGGCTCTTTATGTGTAGATCAGTTTAAGAGCTAAGCTGTAGGAAAGGGATCACCGTTC
TM1	A1	Targeting	CANX_-_179132689.23-P2	TGCAAGTGTACAAATCCAGCCCACCTTGTTGGTTTATGTGTAGATCATGGAGTTTAAGAGCTAAGCTGTAGGAAAGGGATCACCGTTC
TM1	A1	Targeting	CCDC107_+_35657769.23-P1P2	TGCAAGTGTACAAATCCAGCCCACCTTGTTGGTGTCCGCGCACCAACCACAGTTTAAGAGCTAAGCTGTAGGAAAGGGATCACCGTTC
TM1	A1	Targeting	CCDC107_+_35657926.23-P1P2	TGCAAGTGTACAAATCCAGCCCACCTTGTTGGGGGAAAGTCCCCGGACCTCGTTTAAGAGCTAAGCTGTAGGAAAGGGATCACCGTTC
TM1	A1	Targeting	CCDC107_+_35658000.23-P1P2	TGCAAGTGTACAAATCCAGCCCACCTTGTTGGAGGACGTGGTTCGTGCTGAGTTTAAGAGCTAAGCTGTAGGAAAGGGATCACCGTTC
TM1	A1	Targeting	CCDC107_+_35658242.23-P1P2	TGCAAGTGTACAAATCCAGCCCACCTTGTTGGACGCCCACTCCCCGTAGGGGTTTAAGAGCTAAGCTGTAGGAAAGGGATCACCGTTC
TM1	A1	Targeting	CCDC107_+_35658245.23-P1P2	TGCAAGTGTACAAATCCAGCCCACCTTGTTGGGCCACGCCCACTCCCCGTAGTTTAAGAGCTAAGCTGTAGGAAAGGGATCACCGTTC
TM1	A1	Targeting	CCDC107_+_35658271.23-P1P2	TGCAAGTGTACAAATCCAGCCCACCTTGTTGGCGAGCAGGCCGGCCGGCTCGTTTAAGAGCTAAGCTGTAGGAAAGGGATCACCGTTC
TM1	A1	Targeting	CCDC107_+_35658281.23-P1P2	TGCAAGTGTACAAATCCAGCCCACCTTGTTGGCACGCGCACGCGAGCAGGCGTTTAAGAGCTAAGCTGTAGGAAAGGGATCACCGTTC
TM1	A1	Targeting	CCDC107_-_35657814.23-P1P2	TGCAAGTGTACAAATCCAGCCCACCTTGTTGGCACTGCCTGCGTAACTAGAGTTTAAGAGCTAAGCTGTAGGAAAGGGATCACCGTTC
TM1	A1	Targeting	CCDC107_-_35658253.23-P1P2	TGCAAGTGTACAAATCCAGCCCACCTTGTTGGTGGTCTGGCCCCGCCCTACGTTTAAGAGCTAAGCTGTAGGAAAGGGATCACCGTTC
TM1	A1	Targeting	CCDC107_-_35658260.23-P1P2	TGCAAGTGTACAAATCCAGCCCACCTTGTTGGGCCCCGCCCTACGGGGAGTGTTTAAGAGCTAAGCTGTAGGAAAGGGATCACCGTTC
TM1	A1	Targeting	CCDC136_+_128430569.23-P1P2	TGCAAGTGTACAAATCCAGCCCACCTTGTTGGTCTCGGCAAGGATAGAAGTGTTTAAGAGCTAAGCTGTAGGAAAGGGATCACCGTTC
TM1	A1	Targeting	CCDC136_+_128431102.23-P1P2	TGCAAGTGTACAAATCCAGCCCACCTTGTTGGGGACGGCAAAGGACGAGGTGTTTAAGAGCTAAGCTGTAGGAAAGGGATCACCGTTC
TM1	A1	Targeting	CCDC136_+_128431306.23-P1P2	TGCAAGTGTACAAATCCAGCCCACCTTGTTGGCGACCCCGGATACGCCCCAGTTTAAGAGCTAAGCTGTAGGAAAGGGATCACCGTTC
TM1	A1	Targeting	CCDC136_+_128431349.23-P1P2	TGCAAGTGTACAAATCCAGCCCACCTTGTTGGGGAGCTCCGAGCCCGTGCAGTTTAAGAGCTAAGCTGTAGGAAAGGGATCACCGTTC
TM1	A1	Targeting	CCDC136_-_128430754.23-P1P2	TGCAAGTGTACAAATCCAGCCCACCTTGTTGGTCTGAGCGGGCTACTGTGGGTTTAAGAGCTAAGCTGTAGGAAAGGGATCACCGTTC
TM1	A1	Targeting	CCDC136_-_128431194.23-P1P2	TGCAAGTGTACAAATCCAGCCCACCTTGTTGGGGGCACAGCAGACCCCGGGGTTTAAGAGCTAAGCTGTAGGAAAGGGATCACCGTTC
TM1	A1	Targeting	CCDC136_-_128431213.23-P1P2	TGCAAGTGTACAAATCCAGCCCACCTTGTTGGGGGACCCGCCGCCAGAACCGTTTAAGAGCTAAGCTGTAGGAAAGGGATCACCGTTC
TM1	A1	Targeting	CCDC136_-_128431301.23-P1P2	TGCAAGTGTACAAATCCAGCCCACCTTGTTGGGGCTCCCCGCGCTCTCTAGGTTTAAGAGCTAAGCTGTAGGAAAGGGATCACCGTTC
TM1	A1	Targeting	CCDC136_-_128431324.23-P1P2	TGCAAGTGTACAAATCCAGCCCACCTTGTTGGGAGCCTTGGGGCGTATCCGGTTTAAGAGCTAAGCTGTAGGAAAGGGATCACCGTTC
TM1	A1	Targeting	CCDC136_-_128431385.23-P1P2	TGCAAGTGTACAAATCCAGCCCACCTTGTTGGGAGCTCCCGAGTGCTGGGAGTTTAAGAGCTAAGCTGTAGGAAAGGGATCACCGTTC
TM1	A1	Targeting	CCDC141_+_179914833.23-P1P2	TGCAAGTGTACAAATCCAGCCCACCTTGTTGGTCTCTCACGATAAACTCAAGTTTAAGAGCTAAGCTGTAGGAAAGGGATCACCGTTC
TM1	A1	Targeting	CCDC141_+_179914880.23-P1P2	TGCAAGTGTACAAATCCAGCCCACCTTGTTGGTGTCACCATACTAGGGGCGGTTTAAGAGCTAAGCTGTAGGAAAGGGATCACCGTTC
TM1	A1	Targeting	CCDC141_+_179914886.23-P1P2	TGCAAGTGTACAAATCCAGCCCACCTTGTTGGACTTAGTGTCACCATACTAGTTTAAGAGCTAAGCTGTAGGAAAGGGATCACCGTTC
TM1	A1	Targeting	CCDC141_+_179915005.23-P1P2	TGCAAGTGTACAAATCCAGCCCACCTTGTTGGAAAACTAATTTGGGTTGTCGTTTAAGAGCTAAGCTGTAGGAAAGGGATCACCGTTC
TM1	A1	Targeting	CCDC141_+_179915013.23-P1P2	TGCAAGTGTACAAATCCAGCCCACCTTGTTGGTCGGTGGCAAAACTAATTTGTTTAAGAGCTAAGCTGTAGGAAAGGGATCACCGTTC
TM1	A1	Targeting	CCDC141_+_179915028.23-P1P2	TGCAAGTGTACAAATCCAGCCCACCTTGTTGGTACAATGGCATAGTTTCGGGTTTAAGAGCTAAGCTGTAGGAAAGGGATCACCGTTC
TM1	A1	Targeting	CCDC141_-_179914860.23-P1P2	TGCAAGTGTACAAATCCAGCCCACCTTGTTGGAGTTTATCGTGAGAGAGAAGTTTAAGAGCTAAGCTGTAGGAAAGGGATCACCGTTC
TM1	A1	Targeting	CCDC141_-_179914896.23-P1P2	TGCAAGTGTACAAATCCAGCCCACCTTGTTGGAATTGCCACGCCCCTAGTAGTTTAAGAGCTAAGCTGTAGGAAAGGGATCACCGTTC
TM1	A1	Targeting	CCDC141_-_179914942.23-P1P2	TGCAAGTGTACAAATCCAGCCCACCTTGTTGGGCTGTTATCTTAAATGTGGGTTTAAGAGCTAAGCTGTAGGAAAGGGATCACCGTTC
TM1	A1	Targeting	CCDC141_-_179915338.23-P1P2	TGCAAGTGTACAAATCCAGCCCACCTTGTTGGTCAACCAGCATTTATAAATGTTTAAGAGCTAAGCTGTAGGAAAGGGATCACCGTTC
TM1	A1	Targeting	CCDC144A_+_16593003.23-P1P2	TGCAAGTGTACAAATCCAGCCCACCTTGTTGGTGGAGCCAGGGACCAGCTCGTTTAAGAGCTAAGCTGTAGGAAAGGGATCACCGTTC
TM1	A1	Targeting	CCDC144A_+_16593186.23-P1P2	TGCAAGTGTACAAATCCAGCCCACCTTGTTGGTTGCTCGGTTCAGGGGTACGTTTAAGAGCTAAGCTGTAGGAAAGGGATCACCGTTC
TM1	A1	Targeting	CCDC144A_+_16593549.23-P1P2	TGCAAGTGTACAAATCCAGCCCACCTTGTTGGAGCCACCGCAAAGCCTCGTGTTTAAGAGCTAAGCTGTAGGAAAGGGATCACCGTTC
TM1	A1	Targeting	CCDC144A_+_16593861.23-P1P2	TGCAAGTGTACAAATCCAGCCCACCTTGTTGGTGTTTTTCCACCAGCTGTAGTTTAAGAGCTAAGCTGTAGGAAAGGGATCACCGTTC
TM1	A1	Targeting	CCDC144A_-_16593507.23-P1P2	TGCAAGTGTACAAATCCAGCCCACCTTGTTGGACAGGTTCCGTGATGTCACGTTTAAGAGCTAAGCTGTAGGAAAGGGATCACCGTTC
TM1	A1	Targeting	CCDC144A_-_16593557.23-P1P2	TGCAAGTGTACAAATCCAGCCCACCTTGTTGGTGGCTTGGCCTTACCCACGGTTTAAGAGCTAAGCTGTAGGAAAGGGATCACCGTTC
TM1	A1	Targeting	CCDC144A_-_16593575.23-P1P2	TGCAAGTGTACAAATCCAGCCCACCTTGTTGGGAGGCTTTGCGGTGGCTGTGTTTAAGAGCTAAGCTGTAGGAAAGGGATCACCGTTC
TM1	A1	Targeting	CCDC144A_-_16593580.23-P1P2	TGCAAGTGTACAAATCCAGCCCACCTTGTTGGTTTGCGGTGGCTGTTGGCTGTTTAAGAGCTAAGCTGTAGGAAAGGGATCACCGTTC
TM1	A1	Targeting	CCDC144A_-_16593586.23-P1P2	TGCAAGTGTACAAATCCAGCCCACCTTGTTGGGTGGCTGTTGGCTTGGCGGGTTTAAGAGCTAAGCTGTAGGAAAGGGATCACCGTTC
TM1	A1	Targeting	CCDC144A_-_16593811.23-P1P2	TGCAAGTGTACAAATCCAGCCCACCTTGTTGGCCCCTAGCGTCGGGAGCCAGTTTAAGAGCTAAGCTGTAGGAAAGGGATCACCGTTC
TM1	A1	Targeting	CCDC155_+_49891289.23-P1P2	TGCAAGTGTACAAATCCAGCCCACCTTGTTGGTGGCTGCGCCCGCCATGCTGTTTAAGAGCTAAGCTGTAGGAAAGGGATCACCGTTC
TM1	A1	Targeting	CCDC155_+_49891386.23-P1P2	TGCAAGTGTACAAATCCAGCCCACCTTGTTGGAGACGCAGGTGCAAACCGGGTTTAAGAGCTAAGCTGTAGGAAAGGGATCACCGTTC
TM1	A1	Targeting	CCDC155_+_49891389.23-P1P2	TGCAAGTGTACAAATCCAGCCCACCTTGTTGGTTAAGACGCAGGTGCAAACGTTTAAGAGCTAAGCTGTAGGAAAGGGATCACCGTTC
TM1	A1	Targeting	CCDC155_+_49891399.23-P1P2	TGCAAGTGTACAAATCCAGCCCACCTTGTTGGCGGACTCCTCTTAAGACGCGTTTAAGAGCTAAGCTGTAGGAAAGGGATCACCGTTC
TM1	A1	Targeting	CCDC155_+_49891467.23-P1P2	TGCAAGTGTACAAATCCAGCCCACCTTGTTGGAAAAAGCAAAAGGAGGCGAGTTTAAGAGCTAAGCTGTAGGAAAGGGATCACCGTTC
TM1	A1	Targeting	CCDC155_+_49891516.23-P1P2	TGCAAGTGTACAAATCCAGCCCACCTTGTTGGACGAACGGCAGTTGAGTTGGTTTAAGAGCTAAGCTGTAGGAAAGGGATCACCGTTC
TM1	A1	Targeting	CCDC155_-_49891343.23-P1P2	TGCAAGTGTACAAATCCAGCCCACCTTGTTGGCACCACCAGACAAACTCCGGTTTAAGAGCTAAGCTGTAGGAAAGGGATCACCGTTC
TM1	A1	Targeting	CCDC155_-_49891385.23-P1P2	TGCAAGTGTACAAATCCAGCCCACCTTGTTGGGCGCATGCGTGACACGCGTGTTTAAGAGCTAAGCTGTAGGAAAGGGATCACCGTTC
TM1	A1	Targeting	CCDC155_-_49891392.23-P1P2	TGCAAGTGTACAAATCCAGCCCACCTTGTTGGCGTGACACGCGTCGGCCGCGTTTAAGAGCTAAGCTGTAGGAAAGGGATCACCGTTC
TM1	A1	Targeting	CCDC155_-_49891425.23-P1P2	TGCAAGTGTACAAATCCAGCCCACCTTGTTGGGTCTTAAGAGGAGTCCGGGGTTTAAGAGCTAAGCTGTAGGAAAGGGATCACCGTTC
TM1	A1	Targeting	CCDC167_+_37467657.23-P1P2	TGCAAGTGTACAAATCCAGCCCACCTTGTTGGGGGCGCGTCCAGTGATGACGTTTAAGAGCTAAGCTGTAGGAAAGGGATCACCGTTC
TM1	A1	Targeting	CCDC167_+_37467730.23-P1P2	TGCAAGTGTACAAATCCAGCCCACCTTGTTGGCCACCTCCCGCTGACTCGGGTTTAAGAGCTAAGCTGTAGGAAAGGGATCACCGTTC
TM1	A1	Targeting	CCDC167_+_37467760.23-P1P2	TGCAAGTGTACAAATCCAGCCCACCTTGTTGGCCCCTCAACAAGATGGCGAGTTTAAGAGCTAAGCTGTAGGAAAGGGATCACCGTTC
TM1	A1	Targeting	CCDC167_+_37467766.23-P1P2	TGCAAGTGTACAAATCCAGCCCACCTTGTTGGGCCGCGCCCCTCAACAAGAGTTTAAGAGCTAAGCTGTAGGAAAGGGATCACCGTTC
TM1	A1	Targeting	CCDC167_-_37467748.23-P1P2	TGCAAGTGTACAAATCCAGCCCACCTTGTTGGTGGCCACCGAGTCAGCGGGGTTTAAGAGCTAAGCTGTAGGAAAGGGATCACCGTTC
TM1	A1	Targeting	CCDC167_-_37467780.23-P1P2	TGCAAGTGTACAAATCCAGCCCACCTTGTTGGGCCGTCGCCATCTTGTTGAGTTTAAGAGCTAAGCTGTAGGAAAGGGATCACCGTTC
TM1	A1	Targeting	CCDC167_-_37467800.23-P1P2	TGCAAGTGTACAAATCCAGCCCACCTTGTTGGGGGCGCGGCCGGCTTGGTGGTTTAAGAGCTAAGCTGTAGGAAAGGGATCACCGTTC
TM1	A1	Targeting	CCDC167_-_37467815.23-P1P2	TGCAAGTGTACAAATCCAGCCCACCTTGTTGGGGTGCGGACATGTTTATGAGTTTAAGAGCTAAGCTGTAGGAAAGGGATCACCGTTC
TM1	A1	Targeting	CCDC167_-_37467868.23-P1P2	TGCAAGTGTACAAATCCAGCCCACCTTGTTGGGGGTGGAGGGTGGAAAAGTGTTTAAGAGCTAAGCTGTAGGAAAGGGATCACCGTTC
TM1	A1	Targeting	CCDC167_-_37467896.23-P1P2	TGCAAGTGTACAAATCCAGCCCACCTTGTTGGGAGGCAGAATGTACAGCCCGTTTAAGAGCTAAGCTGTAGGAAAGGGATCACCGTTC
TM1	A1	Targeting	CCDC168_+_103411440.23-P1P2	TGCAAGTGTACAAATCCAGCCCACCTTGTTGGCACGTACCTCACTTAACTTGTTTAAGAGCTAAGCTGTAGGAAAGGGATCACCGTTC
TM1	A1	Targeting	CCDC168_+_103411570.23-P1P2	TGCAAGTGTACAAATCCAGCCCACCTTGTTGGTATCTATGAAGTTAAGAGAGTTTAAGAGCTAAGCTGTAGGAAAGGGATCACCGTTC
TM1	A1	Targeting	CCDC168_+_103411689.23-P1P2	TGCAAGTGTACAAATCCAGCCCACCTTGTTGGGCATAAAATACATTGTTCCGTTTAAGAGCTAAGCTGTAGGAAAGGGATCACCGTTC
TM1	A1	Targeting	CCDC168_+_103411852.23-P1P2	TGCAAGTGTACAAATCCAGCCCACCTTGTTGGCATTCTACATAGTTGTAATGTTTAAGAGCTAAGCTGTAGGAAAGGGATCACCGTTC
TM1	A1	Targeting	CCDC168_-_103411471.23-P1P2	TGCAAGTGTACAAATCCAGCCCACCTTGTTGGGTGAGGTACGTGTCATAGTGTTTAAGAGCTAAGCTGTAGGAAAGGGATCACCGTTC
TM1	A1	Targeting	CCDC168_-_103411519.23-P1P2	TGCAAGTGTACAAATCCAGCCCACCTTGTTGGAGCAATAATGGAAGTTCATGTTTAAGAGCTAAGCTGTAGGAAAGGGATCACCGTTC
TM1	A1	Targeting	CCDC168_-_103411611.23-P1P2	TGCAAGTGTACAAATCCAGCCCACCTTGTTGGTAGCAACATAATTCTATCAGTTTAAGAGCTAAGCTGTAGGAAAGGGATCACCGTTC
TM1	A1	Targeting	CCDC168_-_103411725.23-P1P2	TGCAAGTGTACAAATCCAGCCCACCTTGTTGGTTTATGCTTCTTTGTGGTAGTTTAAGAGCTAAGCTGTAGGAAAGGGATCACCGTTC
TM1	A1	Targeting	CCDC168_-_103411770.23-P1P2	TGCAAGTGTACAAATCCAGCCCACCTTGTTGGGAATATAGATAGAGTTGACGTTTAAGAGCTAAGCTGTAGGAAAGGGATCACCGTTC
TM1	A1	Targeting	CCDC168_-_103411949.23-P1P2	TGCAAGTGTACAAATCCAGCCCACCTTGTTGGTATATTTCTTTTTGCTAGCGTTTAAGAGCTAAGCTGTAGGAAAGGGATCACCGTTC
TM1	A1	Targeting	CCDC47_+_61850925.23-P1P2	TGCAAGTGTACAAATCCAGCCCACCTTGTTGGGCGGAGGCTACGTGAAGAGGTTTAAGAGCTAAGCTGTAGGAAAGGGATCACCGTTC
TM1	A1	Targeting	CCDC47_+_61850940.23-P1P2	TGCAAGTGTACAAATCCAGCCCACCTTGTTGGTCTACGTAACGGACGGCGGGTTTAAGAGCTAAGCTGTAGGAAAGGGATCACCGTTC
TM1	A1	Targeting	CCDC47_+_61850993.23-P1P2	TGCAAGTGTACAAATCCAGCCCACCTTGTTGGGGGTTGCGTCCCGCCCCGCGTTTAAGAGCTAAGCTGTAGGAAAGGGATCACCGTTC
TM1	A1	Targeting	CCDC47_+_61851012.23-P1P2	TGCAAGTGTACAAATCCAGCCCACCTTGTTGGAGGTCTCGCGCTTTCCCCGGTTTAAGAGCTAAGCTGTAGGAAAGGGATCACCGTTC
TM1	A1	Targeting	CCDC47_+_61851093.23-P1P2	TGCAAGTGTACAAATCCAGCCCACCTTGTTGGGAGGGCAGTTCCGGCCCAGGTTTAAGAGCTAAGCTGTAGGAAAGGGATCACCGTTC
TM1	A1	Targeting	CCDC47_+_61851110.23-P1P2	TGCAAGTGTACAAATCCAGCCCACCTTGTTGGGGAGGATTGGGATAGGCGAGTTTAAGAGCTAAGCTGTAGGAAAGGGATCACCGTTC
TM1	A1	Targeting	CCDC47_+_61851116.23-P1P2	TGCAAGTGTACAAATCCAGCCCACCTTGTTGGTAGGTAGGAGGATTGGGATGTTTAAGAGCTAAGCTGTAGGAAAGGGATCACCGTTC
TM1	A1	Targeting	CCDC47_+_61851121.23-P1P2	TGCAAGTGTACAAATCCAGCCCACCTTGTTGGAATCCTAGGTAGGAGGATTGTTTAAGAGCTAAGCTGTAGGAAAGGGATCACCGTTC
TM1	A1	Targeting	CCDC47_-_61851074.23-P1P2	TGCAAGTGTACAAATCCAGCCCACCTTGTTGGGAGGCGAGGTGGGGCTTTTGTTTAAGAGCTAAGCTGTAGGAAAGGGATCACCGTTC
TM1	A1	Targeting	CCDC47_-_61851205.23-P1P2	TGCAAGTGTACAAATCCAGCCCACCTTGTTGGAAAGGTGGCCATGCTGTGTGTTTAAGAGCTAAGCTGTAGGAAAGGGATCACCGTTC
TM1	A1	Targeting	CCDC67_+_93063701.23-P1P2	TGCAAGTGTACAAATCCAGCCCACCTTGTTGGGAACTCGTGGCCGTCGGAGGTTTAAGAGCTAAGCTGTAGGAAAGGGATCACCGTTC
TM1	A1	Targeting	CCDC67_+_93063706.23-P1P2	TGCAAGTGTACAAATCCAGCCCACCTTGTTGGGGCCCGAACTCGTGGCCGTGTTTAAGAGCTAAGCTGTAGGAAAGGGATCACCGTTC
TM1	A1	Targeting	CCDC67_+_93063713.23-P1P2	TGCAAGTGTACAAATCCAGCCCACCTTGTTGGACGTCGCGGCCCGAACTCGGTTTAAGAGCTAAGCTGTAGGAAAGGGATCACCGTTC
TM1	A1	Targeting	CCDC67_+_93063737.23-P1P2	TGCAAGTGTACAAATCCAGCCCACCTTGTTGGGCGCCGCCGCGTGTTGCCAGTTTAAGAGCTAAGCTGTAGGAAAGGGATCACCGTTC
TM1	A1	Targeting	CCDC67_-_93063648.23-P1P2	TGCAAGTGTACAAATCCAGCCCACCTTGTTGGTCGCGCGGGGTGAGGTTGGGTTTAAGAGCTAAGCTGTAGGAAAGGGATCACCGTTC
TM1	A1	Targeting	CCDC67_-_93063712.23-P1P2	TGCAAGTGTACAAATCCAGCCCACCTTGTTGGCGCCCATCCCCCACTCCGAGTTTAAGAGCTAAGCTGTAGGAAAGGGATCACCGTTC
TM1	A1	Targeting	CCDC67_-_93063742.23-P1P2	TGCAAGTGTACAAATCCAGCCCACCTTGTTGGTCGGGCCGCGACGTCCCCAGTTTAAGAGCTAAGCTGTAGGAAAGGGATCACCGTTC
TM1	A1	Targeting	CCDC67_-_93063752.23-P1P2	TGCAAGTGTACAAATCCAGCCCACCTTGTTGGACGTCCCCATGGCAACACGGTTTAAGAGCTAAGCTGTAGGAAAGGGATCACCGTTC
TM1	A1	Targeting	CCDC67_-_93063755.23-P1P2	TGCAAGTGTACAAATCCAGCCCACCTTGTTGGTCCCCATGGCAACACGCGGGTTTAAGAGCTAAGCTGTAGGAAAGGGATCACCGTTC
TM1	A1	Targeting	CCDC67_-_93063795.23-P1P2	TGCAAGTGTACAAATCCAGCCCACCTTGTTGGAGAGGCCCAACTGCCTCGTGTTTAAGAGCTAAGCTGTAGGAAAGGGATCACCGTTC
TM1	A1	Targeting	CCL5_+_34207386.23-P1P2	TGCAAGTGTACAAATCCAGCCCACCTTGTTGGCCTCAACTGGCCCTATAAAGTTTAAGAGCTAAGCTGTAGGAAAGGGATCACCGTTC
TM1	A1	Targeting	CCL5_+_34207414.23-P1P2	TGCAAGTGTACAAATCCAGCCCACCTTGTTGGATTTTGGAAACTCCCCTTAGTTTAAGAGCTAAGCTGTAGGAAAGGGATCACCGTTC
TM1	A1	Targeting	CCL5_+_34207501.23-P1P2	TGCAAGTGTACAAATCCAGCCCACCTTGTTGGCAGAGACTCGAATTTCCGGGTTTAAGAGCTAAGCTGTAGGAAAGGGATCACCGTTC
TM1	A1	Targeting	CCL5_+_34207504.23-P1P2	TGCAAGTGTACAAATCCAGCCCACCTTGTTGGAGACAGAGACTCGAATTTCGTTTAAGAGCTAAGCTGTAGGAAAGGGATCACCGTTC
TM1	A1	Targeting	CCL5_+_34207567.23-P1P2	TGCAAGTGTACAAATCCAGCCCACCTTGTTGGCATTGGTGCTTGGTCAAAGGTTTAAGAGCTAAGCTGTAGGAAAGGGATCACCGTTC
TM1	A1	Targeting	CCL5_+_34207661.23-P1P2	TGCAAGTGTACAAATCCAGCCCACCTTGTTGGCTTGTTGTCCCCAAGAAAGGTTTAAGAGCTAAGCTGTAGGAAAGGGATCACCGTTC
TM1	A1	Targeting	CCL5_-_34207421.23-P1P2	TGCAAGTGTACAAATCCAGCCCACCTTGTTGGAGTTGAGGGGCATCCCCTAGTTTAAGAGCTAAGCTGTAGGAAAGGGATCACCGTTC
TM1	A1	Targeting	CCL5_-_34207451.23-P1P2	TGCAAGTGTACAAATCCAGCCCACCTTGTTGGCAAAATAGCAACCAAGCATGTTTAAGAGCTAAGCTGTAGGAAAGGGATCACCGTTC
TM1	A1	Targeting	CCL5_-_34207674.23-P1P2	TGCAAGTGTACAAATCCAGCCCACCTTGTTGGGCAGGAAGCCGCTTTCTTGGTTTAAGAGCTAAGCTGTAGGAAAGGGATCACCGTTC
TM1	A1	Targeting	CCL5_-_34207701.23-P1P2	TGCAAGTGTACAAATCCAGCCCACCTTGTTGGAAGGAGTGGCAGTTAGGACGTTTAAGAGCTAAGCTGTAGGAAAGGGATCACCGTTC
TM1	A1	Targeting	CCL7_+_32596927.23-P1P2	TGCAAGTGTACAAATCCAGCCCACCTTGTTGGCCAAAGTCAAAGATATGTAGTTTAAGAGCTAAGCTGTAGGAAAGGGATCACCGTTC
TM1	A1	Targeting	CCL7_+_32597017.23-P1P2	TGCAAGTGTACAAATCCAGCCCACCTTGTTGGGACCACAGTATGTAATCTAGTTTAAGAGCTAAGCTGTAGGAAAGGGATCACCGTTC
TM1	A1	Targeting	CCL7_+_32597041.23-P1P2	TGCAAGTGTACAAATCCAGCCCACCTTGTTGGTGAGGTAGGGTCTATGTAGGTTTAAGAGCTAAGCTGTAGGAAAGGGATCACCGTTC
TM1	A1	Targeting	CCL7_+_32597072.23-P1P2	TGCAAGTGTACAAATCCAGCCCACCTTGTTGGCTGTTTTTCAGCTAAGACCGTTTAAGAGCTAAGCTGTAGGAAAGGGATCACCGTTC
TM1	A1	Targeting	CCL7_+_32597099.23-P1P2	TGCAAGTGTACAAATCCAGCCCACCTTGTTGGGAAATGACAGTATGAGTCGGTTTAAGAGCTAAGCTGTAGGAAAGGGATCACCGTTC
TM1	A1	Targeting	CCL7_+_32597125.23-P1P2	TGCAAGTGTACAAATCCAGCCCACCTTGTTGGGCCAGTGCACTTCAGTGGGGTTTAAGAGCTAAGCTGTAGGAAAGGGATCACCGTTC
TM1	A1	Targeting	CCL7_+_32597128.23-P1P2	TGCAAGTGTACAAATCCAGCCCACCTTGTTGGTGAGCCAGTGCACTTCAGTGTTTAAGAGCTAAGCTGTAGGAAAGGGATCACCGTTC
TM1	A1	Targeting	CCL7_-_32596912.23-P1P2	TGCAAGTGTACAAATCCAGCCCACCTTGTTGGCTAGGGATACCACTCCAAAGTTTAAGAGCTAAGCTGTAGGAAAGGGATCACCGTTC
TM1	A1	Targeting	CCL7_-_32597076.23-P1P2	TGCAAGTGTACAAATCCAGCCCACCTTGTTGGCTACCTCACCTACCACTCCGTTTAAGAGCTAAGCTGTAGGAAAGGGATCACCGTTC
TM1	A1	Targeting	CCL7_-_32597145.23-P1P2	TGCAAGTGTACAAATCCAGCCCACCTTGTTGGTCCTCCCACTGAAGTGCACGTTTAAGAGCTAAGCTGTAGGAAAGGGATCACCGTTC
TM1	A1	Targeting	CD101_+_117543967.23-P1P2	TGCAAGTGTACAAATCCAGCCCACCTTGTTGGGGTTACAGGCTCTAGAGTCGTTTAAGAGCTAAGCTGTAGGAAAGGGATCACCGTTC
TM1	A1	Targeting	CD101_+_117543980.23-P1P2	TGCAAGTGTACAAATCCAGCCCACCTTGTTGGAGGTGGTGCTGAAGGTTACGTTTAAGAGCTAAGCTGTAGGAAAGGGATCACCGTTC
TM1	A1	Targeting	CD101_+_117543987.23-P1P2	TGCAAGTGTACAAATCCAGCCCACCTTGTTGGCGACATGAGGTGGTGCTGAGTTTAAGAGCTAAGCTGTAGGAAAGGGATCACCGTTC
TM1	A1	Targeting	CD101_+_117543999.23-P1P2	TGCAAGTGTACAAATCCAGCCCACCTTGTTGGATGAACTTGGGGCGACATGGTTTAAGAGCTAAGCTGTAGGAAAGGGATCACCGTTC
TM1	A1	Targeting	CD101_+_117544010.23-P1P2	TGCAAGTGTACAAATCCAGCCCACCTTGTTGGCCCTGAAAAACATGAACTTGTTTAAGAGCTAAGCTGTAGGAAAGGGATCACCGTTC
TM1	A1	Targeting	CD101_+_117544039.23-P1P2	TGCAAGTGTACAAATCCAGCCCACCTTGTTGGGAGGAAATGACTGAGAAATGTTTAAGAGCTAAGCTGTAGGAAAGGGATCACCGTTC
TM1	A1	Targeting	CD101_+_117544173.23-P1P2	TGCAAGTGTACAAATCCAGCCCACCTTGTTGGGAAAAGATGGGTCTCAACCGTTTAAGAGCTAAGCTGTAGGAAAGGGATCACCGTTC
TM1	A1	Targeting	CD101_+_117544184.23-P1P2	TGCAAGTGTACAAATCCAGCCCACCTTGTTGGGATAAAACTAAGAAAAGATGTTTAAGAGCTAAGCTGTAGGAAAGGGATCACCGTTC
TM1	A1	Targeting	CD101_+_117544245.23-P1P2	TGCAAGTGTACAAATCCAGCCCACCTTGTTGGTTACTAATCACTCAAATTTGTTTAAGAGCTAAGCTGTAGGAAAGGGATCACCGTTC
TM1	A1	Targeting	CD101_+_117544284.23-P1P2	TGCAAGTGTACAAATCCAGCCCACCTTGTTGGGTCTTGTGAAAAGCAAAACGTTTAAGAGCTAAGCTGTAGGAAAGGGATCACCGTTC
TM1	A1	Targeting	CD109_+_74405381.23-P1P2	TGCAAGTGTACAAATCCAGCCCACCTTGTTGGAAACCGGGGCGTATTTCCTGTTTAAGAGCTAAGCTGTAGGAAAGGGATCACCGTTC
TM1	A1	Targeting	CD109_+_74405553.23-P1P2	TGCAAGTGTACAAATCCAGCCCACCTTGTTGGGCTCTACCAACGATGCCCAGTTTAAGAGCTAAGCTGTAGGAAAGGGATCACCGTTC
TM1	A1	Targeting	CD109_+_74405589.23-P1P2	TGCAAGTGTACAAATCCAGCCCACCTTGTTGGCCGGCCCACCGGGTTCCTCGTTTAAGAGCTAAGCTGTAGGAAAGGGATCACCGTTC
TM1	A1	Targeting	CD109_+_74405695.23-P1P2	TGCAAGTGTACAAATCCAGCCCACCTTGTTGGGCAAACATCGCAAATCCAGGTTTAAGAGCTAAGCTGTAGGAAAGGGATCACCGTTC
TM1	A1	Targeting	CD109_+_74405734.23-P1P2	TGCAAGTGTACAAATCCAGCCCACCTTGTTGGCCTCCCATCCCCATTACAAGTTTAAGAGCTAAGCTGTAGGAAAGGGATCACCGTTC
TM1	A1	Targeting	CD109_-_74405540.23-P1P2	TGCAAGTGTACAAATCCAGCCCACCTTGTTGGAATTTCTCCTCACAAGGATGTTTAAGAGCTAAGCTGTAGGAAAGGGATCACCGTTC
TM1	A1	Targeting	CD109_-_74405606.23-P1P2	TGCAAGTGTACAAATCCAGCCCACCTTGTTGGACAGCCTGAGGAACCCGGTGTTTAAGAGCTAAGCTGTAGGAAAGGGATCACCGTTC
TM1	A1	Targeting	CD109_-_74405638.23-P1P2	TGCAAGTGTACAAATCCAGCCCACCTTGTTGGGGGCGCGCTCTGTTCTCCGGTTTAAGAGCTAAGCTGTAGGAAAGGGATCACCGTTC
TM1	A1	Targeting	CD109_-_74405665.23-P1P2	TGCAAGTGTACAAATCCAGCCCACCTTGTTGGTGGGACGCCGGGCCAGGTGGTTTAAGAGCTAAGCTGTAGGAAAGGGATCACCGTTC
TM1	A1	Targeting	CD109_-_74405746.23-P1P2	TGCAAGTGTACAAATCCAGCCCACCTTGTTGGCGAGAAGCGCCATTGTAATGTTTAAGAGCTAAGCTGTAGGAAAGGGATCACCGTTC
TM1	A1	Targeting	CD163L1_-_7596862.23-ENST00000313599.3	TGCAAGTGTACAAATCCAGCCCACCTTGTTGGTGAGTTCATAGTTTTCCAAGTTTAAGAGCTAAGCTGTAGGAAAGGGATCACCGTTC
TM1	A1	Targeting	CD163L1_-_7596885.23-ENST00000313599.3	TGCAAGTGTACAAATCCAGCCCACCTTGTTGGGAAGTCATTATAAAAGCTGGTTTAAGAGCTAAGCTGTAGGAAAGGGATCACCGTTC
TM1	A1	Targeting	CD163L1_-_7596920.23-ENST00000313599.3	TGCAAGTGTACAAATCCAGCCCACCTTGTTGGGCTACTTCCTTATCACGTTGTTTAAGAGCTAAGCTGTAGGAAAGGGATCACCGTTC
TM1	A1	Targeting	CD163L1_-_7596926.23-ENST00000313599.3	TGCAAGTGTACAAATCCAGCCCACCTTGTTGGTCCTTATCACGTTAGGATAGTTTAAGAGCTAAGCTGTAGGAAAGGGATCACCGTTC
TM1	A1	Targeting	CD163L1_-_7596936.23-ENST00000313599.3	TGCAAGTGTACAAATCCAGCCCACCTTGTTGGGTTAGGATATGGAAAACAAGTTTAAGAGCTAAGCTGTAGGAAAGGGATCACCGTTC
TM1	A1	Targeting	CD163L1_-_7596956.23-ENST00000313599.3	TGCAAGTGTACAAATCCAGCCCACCTTGTTGGGGAAGTTAAATAATATGCCGTTTAAGAGCTAAGCTGTAGGAAAGGGATCACCGTTC
TM1	A1	Targeting	CD163L1_-_7596976.23-ENST00000313599.3	TGCAAGTGTACAAATCCAGCCCACCTTGTTGGGGAAAGTCTCACAGAATAAGTTTAAGAGCTAAGCTGTAGGAAAGGGATCACCGTTC
TM1	A1	Targeting	CD163L1_-_7597107.23-ENST00000313599.3	TGCAAGTGTACAAATCCAGCCCACCTTGTTGGAAAGATAAAATATATCATCGTTTAAGAGCTAAGCTGTAGGAAAGGGATCACCGTTC
TM1	A1	Targeting	CD163L1_-_7597163.23-ENST00000313599.3	TGCAAGTGTACAAATCCAGCCCACCTTGTTGGATGCTAAAAGGATCAGAAGGTTTAAGAGCTAAGCTGTAGGAAAGGGATCACCGTTC
TM1	A1	Targeting	CD163L1_-_7597182.23-ENST00000313599.3	TGCAAGTGTACAAATCCAGCCCACCTTGTTGGAGGTTACATTGCTGAAAACGTTTAAGAGCTAAGCTGTAGGAAAGGGATCACCGTTC
TM1	A1	Targeting	CD163_+_7656505.23-P1P2	TGCAAGTGTACAAATCCAGCCCACCTTGTTGGAGTGTTTCCCAATTTCCTTGTTTAAGAGCTAAGCTGTAGGAAAGGGATCACCGTTC
TM1	A1	Targeting	CD163_+_7656529.23-P1P2	TGCAAGTGTACAAATCCAGCCCACCTTGTTGGTCTAATTTTTCGAAATCTGGTTTAAGAGCTAAGCTGTAGGAAAGGGATCACCGTTC
TM1	A1	Targeting	CD163_+_7656839.23-P1P2	TGCAAGTGTACAAATCCAGCCCACCTTGTTGGGTAATATCAGTAATAGTCAGTTTAAGAGCTAAGCTGTAGGAAAGGGATCACCGTTC
TM1	A1	Targeting	CD163_-_7656415.23-P1P2	TGCAAGTGTACAAATCCAGCCCACCTTGTTGGAAAATGAAAAGGCTACATAGTTTAAGAGCTAAGCTGTAGGAAAGGGATCACCGTTC
TM1	A1	Targeting	CD163_-_7656418.23-P1P2	TGCAAGTGTACAAATCCAGCCCACCTTGTTGGATGAAAAGGCTACATATGGGTTTAAGAGCTAAGCTGTAGGAAAGGGATCACCGTTC
TM1	A1	Targeting	CD163_-_7656438.23-P1P2	TGCAAGTGTACAAATCCAGCCCACCTTGTTGGGGCGGAGTCAACTCAAAAAGTTTAAGAGCTAAGCTGTAGGAAAGGGATCACCGTTC
TM1	A1	Targeting	CD163_-_7656459.23-P1P2	TGCAAGTGTACAAATCCAGCCCACCTTGTTGGGAAGTCATTGAAAGAGCTGGTTTAAGAGCTAAGCTGTAGGAAAGGGATCACCGTTC
TM1	A1	Targeting	CD163_-_7656511.23-P1P2	TGCAAGTGTACAAATCCAGCCCACCTTGTTGGTAGCACATGAAACAACCAAGTTTAAGAGCTAAGCTGTAGGAAAGGGATCACCGTTC
TM1	A1	Targeting	CD163_-_7656518.23-P1P2	TGCAAGTGTACAAATCCAGCCCACCTTGTTGGTGAAACAACCAAAGGAAATGTTTAAGAGCTAAGCTGTAGGAAAGGGATCACCGTTC
TM1	A1	Targeting	CD163_-_7656689.23-P1P2	TGCAAGTGTACAAATCCAGCCCACCTTGTTGGTAAAAAACTAAAGCAAAACGTTTAAGAGCTAAGCTGTAGGAAAGGGATCACCGTTC
TM1	A1	Targeting	CD164L2_-_27709862.23-P1P2	TGCAAGTGTACAAATCCAGCCCACCTTGTTGGAACCGGGGCGTGGCCAGGTGTTTAAGAGCTAAGCTGTAGGAAAGGGATCACCGTTC
TM1	A1	Targeting	CD164L2_-_27709910.23-P1P2	TGCAAGTGTACAAATCCAGCCCACCTTGTTGGGGGCGGGGCTCGTCGGTCGGTTTAAGAGCTAAGCTGTAGGAAAGGGATCACCGTTC
TM1	A1	Targeting	CD164L2_-_27709913.23-P1P2	TGCAAGTGTACAAATCCAGCCCACCTTGTTGGCGGGGCTCGTCGGTCGGGGGTTTAAGAGCTAAGCTGTAGGAAAGGGATCACCGTTC
TM1	A1	Targeting	CD164L2_-_27709931.23-P1P2	TGCAAGTGTACAAATCCAGCCCACCTTGTTGGGCGGAGCCAGGTGAAGGCGGTTTAAGAGCTAAGCTGTAGGAAAGGGATCACCGTTC
TM1	A1	Targeting	CD164L2_-_27709942.23-P1P2	TGCAAGTGTACAAATCCAGCCCACCTTGTTGGTGAAGGCGGGGCCAGTTAGGTTTAAGAGCTAAGCTGTAGGAAAGGGATCACCGTTC
TM1	A1	Targeting	CD164L2_-_27709974.23-P1P2	TGCAAGTGTACAAATCCAGCCCACCTTGTTGGGTGCGCGGCCAGGTGAGTTGTTTAAGAGCTAAGCTGTAGGAAAGGGATCACCGTTC
TM1	A1	Targeting	CD164L2_-_27709977.23-P1P2	TGCAAGTGTACAAATCCAGCCCACCTTGTTGGCGCGGCCAGGTGAGTTCGGGTTTAAGAGCTAAGCTGTAGGAAAGGGATCACCGTTC
TM1	A1	Targeting	CD164L2_-_27710005.23-P1P2	TGCAAGTGTACAAATCCAGCCCACCTTGTTGGGCGGGGCTTGGACTAAAGCGTTTAAGAGCTAAGCTGTAGGAAAGGGATCACCGTTC
TM1	A1	Targeting	CD164L2_-_27710008.23-P1P2	TGCAAGTGTACAAATCCAGCCCACCTTGTTGGGGGCTTGGACTAAAGCAGGGTTTAAGAGCTAAGCTGTAGGAAAGGGATCACCGTTC
TM1	A1	Targeting	CD164L2_-_27710016.23-P1P2	TGCAAGTGTACAAATCCAGCCCACCTTGTTGGACTAAAGCAGGTGGGGTCCGTTTAAGAGCTAAGCTGTAGGAAAGGGATCACCGTTC
TM1	A1	Targeting	CD164_+_109703636.23-P1P2	TGCAAGTGTACAAATCCAGCCCACCTTGTTGGGGCGCCGCAGGGGATTGAGGTTTAAGAGCTAAGCTGTAGGAAAGGGATCACCGTTC
TM1	A1	Targeting	CD164_+_109703774.23-P1P2	TGCAAGTGTACAAATCCAGCCCACCTTGTTGGCTCCCCTGCTTCCCCCCGTGTTTAAGAGCTAAGCTGTAGGAAAGGGATCACCGTTC
TM1	A1	Targeting	CD164_+_109703924.23-P1P2	TGCAAGTGTACAAATCCAGCCCACCTTGTTGGTGGGGGCCGTCCCTATCGCGTTTAAGAGCTAAGCTGTAGGAAAGGGATCACCGTTC
TM1	A1	Targeting	CD164_+_109703993.23-P1P2	TGCAAGTGTACAAATCCAGCCCACCTTGTTGGACAGCCTGGCGGGGCGCTCGTTTAAGAGCTAAGCTGTAGGAAAGGGATCACCGTTC
TM1	A1	Targeting	CD164_-_109703696.23-P1P2	TGCAAGTGTACAAATCCAGCCCACCTTGTTGGCCCCCGCGGGAGCGCGCAGGTTTAAGAGCTAAGCTGTAGGAAAGGGATCACCGTTC
TM1	A1	Targeting	CD164_-_109703708.23-P1P2	TGCAAGTGTACAAATCCAGCCCACCTTGTTGGCGCGCAGGGGTCACGTGAGGTTTAAGAGCTAAGCTGTAGGAAAGGGATCACCGTTC
TM1	A1	Targeting	CD164_-_109703770.23-P1P2	TGCAAGTGTACAAATCCAGCCCACCTTGTTGGGGGCTCGGACGATACCAACGTTTAAGAGCTAAGCTGTAGGAAAGGGATCACCGTTC
TM1	A1	Targeting	CD164_-_109703780.23-P1P2	TGCAAGTGTACAAATCCAGCCCACCTTGTTGGGATACCAACGGGAATCCTAGTTTAAGAGCTAAGCTGTAGGAAAGGGATCACCGTTC
TM1	A1	Targeting	CD164_-_109703784.23-P1P2	TGCAAGTGTACAAATCCAGCCCACCTTGTTGGCCAACGGGAATCCTACGGGGTTTAAGAGCTAAGCTGTAGGAAAGGGATCACCGTTC
TM1	A1	Targeting	CD164_-_109703792.23-P1P2	TGCAAGTGTACAAATCCAGCCCACCTTGTTGGAATCCTACGGGGGGAAGCAGTTTAAGAGCTAAGCTGTAGGAAAGGGATCACCGTTC
TM1	A1	Targeting	CD180_+_66492685.23-P1P2	TGCAAGTGTACAAATCCAGCCCACCTTGTTGGTTGGGTCCTCAGTTATTTTGTTTAAGAGCTAAGCTGTAGGAAAGGGATCACCGTTC
TM1	A1	Targeting	CD180_+_66492702.23-P1P2	TGCAAGTGTACAAATCCAGCCCACCTTGTTGGAACGGGCCATTCTGGGGTTGTTTAAGAGCTAAGCTGTAGGAAAGGGATCACCGTTC
TM1	A1	Targeting	CD180_+_66492707.23-P1P2	TGCAAGTGTACAAATCCAGCCCACCTTGTTGGAATGCAACGGGCCATTCTGGTTTAAGAGCTAAGCTGTAGGAAAGGGATCACCGTTC
TM1	A1	Targeting	CD180_+_66492761.23-P1P2	TGCAAGTGTACAAATCCAGCCCACCTTGTTGGTCTGTGTGATCAGCCCAAAGTTTAAGAGCTAAGCTGTAGGAAAGGGATCACCGTTC
TM1	A1	Targeting	CD180_+_66492833.23-P1P2	TGCAAGTGTACAAATCCAGCCCACCTTGTTGGGACCAGAAGCTGTTGGAGTGTTTAAGAGCTAAGCTGTAGGAAAGGGATCACCGTTC
TM1	A1	Targeting	CD180_-_66492734.23-P1P2	TGCAAGTGTACAAATCCAGCCCACCTTGTTGGAATGGCCCGTTGCATTTCCGTTTAAGAGCTAAGCTGTAGGAAAGGGATCACCGTTC
TM1	A1	Targeting	CD180_-_66492769.23-P1P2	TGCAAGTGTACAAATCCAGCCCACCTTGTTGGTCAGTTGTGCAGTCCTTTTGTTTAAGAGCTAAGCTGTAGGAAAGGGATCACCGTTC
TM1	A1	Targeting	CD180_-_66492797.23-P1P2	TGCAAGTGTACAAATCCAGCCCACCTTGTTGGACACAGACTCTCATTGTGAGTTTAAGAGCTAAGCTGTAGGAAAGGGATCACCGTTC
TM1	A1	Targeting	CD180_-_66492975.23-P1P2	TGCAAGTGTACAAATCCAGCCCACCTTGTTGGAGGGCAGAGCACTCTGCAGGTTTAAGAGCTAAGCTGTAGGAAAGGGATCACCGTTC
TM1	A1	Targeting	CD180_-_66493122.23-P1P2	TGCAAGTGTACAAATCCAGCCCACCTTGTTGGCACCTCTGGTCTTCGTATAGTTTAAGAGCTAAGCTGTAGGAAAGGGATCACCGTTC
TM1	A1	Targeting	CD1A_+_158224183.23-P1P2	TGCAAGTGTACAAATCCAGCCCACCTTGTTGGTCCCCTAATTCAACTGCTAGTTTAAGAGCTAAGCTGTAGGAAAGGGATCACCGTTC
TM1	A1	Targeting	CD1A_-_158223751.23-P1P2	TGCAAGTGTACAAATCCAGCCCACCTTGTTGGAGGTGCTAAGAGAGACTGTGTTTAAGAGCTAAGCTGTAGGAAAGGGATCACCGTTC
TM1	A1	Targeting	CD1A_-_158223895.23-P1P2	TGCAAGTGTACAAATCCAGCCCACCTTGTTGGGGCTCTTCTCTAAGAATAAGTTTAAGAGCTAAGCTGTAGGAAAGGGATCACCGTTC
TM1	A1	Targeting	CD1A_-_158223938.23-P1P2	TGCAAGTGTACAAATCCAGCCCACCTTGTTGGTGTCGCACAGGGCAGTCGTGTTTAAGAGCTAAGCTGTAGGAAAGGGATCACCGTTC
TM1	A1	Targeting	CD1A_-_158223996.23-P1P2	TGCAAGTGTACAAATCCAGCCCACCTTGTTGGGAAATGTGAATGTAGTAAGGTTTAAGAGCTAAGCTGTAGGAAAGGGATCACCGTTC
TM1	A1	Targeting	CD1A_-_158224026.23-P1P2	TGCAAGTGTACAAATCCAGCCCACCTTGTTGGACAGGGGAAGAGAATACATGTTTAAGAGCTAAGCTGTAGGAAAGGGATCACCGTTC
TM1	A1	Targeting	CD1A_-_158224064.23-P1P2	TGCAAGTGTACAAATCCAGCCCACCTTGTTGGCAGAGTGATCAAAAAGAGCGTTTAAGAGCTAAGCTGTAGGAAAGGGATCACCGTTC
TM1	A1	Targeting	CD1A_-_158224072.23-P1P2	TGCAAGTGTACAAATCCAGCCCACCTTGTTGGTCAAAAAGAGCAGGGACATGTTTAAGAGCTAAGCTGTAGGAAAGGGATCACCGTTC
TM1	A1	Targeting	CD1A_-_158224081.23-P1P2	TGCAAGTGTACAAATCCAGCCCACCTTGTTGGGCAGGGACATGGGAGCATTGTTTAAGAGCTAAGCTGTAGGAAAGGGATCACCGTTC
TM1	A1	Targeting	CD1A_-_158224202.23-P1P2	TGCAAGTGTACAAATCCAGCCCACCTTGTTGGTTCCATAGCAGTTGAATTAGTTTAAGAGCTAAGCTGTAGGAAAGGGATCACCGTTC
TM1	A1	Targeting	CD1B_+_158301288.23-P1P2	TGCAAGTGTACAAATCCAGCCCACCTTGTTGGGAGAGAAGAAGTCACTACAGTTTAAGAGCTAAGCTGTAGGAAAGGGATCACCGTTC
TM1	A1	Targeting	CD1B_+_158301373.23-P1P2	TGCAAGTGTACAAATCCAGCCCACCTTGTTGGAGGTGAGGTAAGAGGCTCAGTTTAAGAGCTAAGCTGTAGGAAAGGGATCACCGTTC
TM1	A1	Targeting	CD1B_+_158301402.23-P1P2	TGCAAGTGTACAAATCCAGCCCACCTTGTTGGTCTAAAAATCAGGGCTTGAGTTTAAGAGCTAAGCTGTAGGAAAGGGATCACCGTTC
TM1	A1	Targeting	CD1B_+_158301437.23-P1P2	TGCAAGTGTACAAATCCAGCCCACCTTGTTGGGGGAGAGCGGCTGGAAGTCGTTTAAGAGCTAAGCTGTAGGAAAGGGATCACCGTTC
TM1	A1	Targeting	CD1B_+_158301479.23-P1P2	TGCAAGTGTACAAATCCAGCCCACCTTGTTGGTATGGGGGCTTTTCCAAGGGTTTAAGAGCTAAGCTGTAGGAAAGGGATCACCGTTC
TM1	A1	Targeting	CD1B_+_158301495.23-P1P2	TGCAAGTGTACAAATCCAGCCCACCTTGTTGGTGAAAATGCAGAATCATATGTTTAAGAGCTAAGCTGTAGGAAAGGGATCACCGTTC
TM1	A1	Targeting	CD1B_+_158301526.23-P1P2	TGCAAGTGTACAAATCCAGCCCACCTTGTTGGGATGTGGGAATAAAGGCTAGTTTAAGAGCTAAGCTGTAGGAAAGGGATCACCGTTC
TM1	A1	Targeting	CD1B_+_158301532.23-P1P2	TGCAAGTGTACAAATCCAGCCCACCTTGTTGGCCTATAGATGTGGGAATAAGTTTAAGAGCTAAGCTGTAGGAAAGGGATCACCGTTC
TM1	A1	Targeting	CD1B_+_158301628.23-P1P2	TGCAAGTGTACAAATCCAGCCCACCTTGTTGGGAGGGGGAGAAACTAAGTGGTTTAAGAGCTAAGCTGTAGGAAAGGGATCACCGTTC
TM1	A1	Targeting	CD1B_-_158301671.23-P1P2	TGCAAGTGTACAAATCCAGCCCACCTTGTTGGCCAGCTGCCTTATCTTCTCGTTTAAGAGCTAAGCTGTAGGAAAGGGATCACCGTTC
TM1	A1	Targeting	CD1C_+_158259164.23-P1P2	TGCAAGTGTACAAATCCAGCCCACCTTGTTGGGCAGCCATTCAGAATGCATGTTTAAGAGCTAAGCTGTAGGAAAGGGATCACCGTTC
TM1	A1	Targeting	CD1C_+_158259542.23-P1P2	TGCAAGTGTACAAATCCAGCCCACCTTGTTGGGTGTATGGCATTGAAAGAAGTTTAAGAGCTAAGCTGTAGGAAAGGGATCACCGTTC
TM1	A1	Targeting	CD1C_-_158259416.23-P1P2	TGCAAGTGTACAAATCCAGCCCACCTTGTTGGGAGGGGACACTATGGAGAGGTTTAAGAGCTAAGCTGTAGGAAAGGGATCACCGTTC
TM1	A1	Targeting	CD1C_-_158259432.23-P1P2	TGCAAGTGTACAAATCCAGCCCACCTTGTTGGGAGTGGAGGCAAAGTTAAGGTTTAAGAGCTAAGCTGTAGGAAAGGGATCACCGTTC
TM1	A1	Targeting	CD1C_-_158259441.23-P1P2	TGCAAGTGTACAAATCCAGCCCACCTTGTTGGCAAAGTTAAGTGGAGAAACGTTTAAGAGCTAAGCTGTAGGAAAGGGATCACCGTTC
TM1	A1	Targeting	CD1C_-_158259606.23-P1P2	TGCAAGTGTACAAATCCAGCCCACCTTGTTGGGGAAGGGAAGTAGATATAAGTTTAAGAGCTAAGCTGTAGGAAAGGGATCACCGTTC
TM1	A1	Targeting	CD1C_-_158259670.23-P1P2	TGCAAGTGTACAAATCCAGCCCACCTTGTTGGACTTTAGTTCAGAGCAGGTGTTTAAGAGCTAAGCTGTAGGAAAGGGATCACCGTTC
TM1	A1	Targeting	CD1C_-_158259700.23-P1P2	TGCAAGTGTACAAATCCAGCCCACCTTGTTGGAGATTGAGTAGGAGGACCAGTTTAAGAGCTAAGCTGTAGGAAAGGGATCACCGTTC
TM1	A1	Targeting	CD1C_-_158259707.23-P1P2	TGCAAGTGTACAAATCCAGCCCACCTTGTTGGGTAGGAGGACCAAGGTTGAGTTTAAGAGCTAAGCTGTAGGAAAGGGATCACCGTTC
TM1	A1	Targeting	CD1C_-_158259763.23-P1P2	TGCAAGTGTACAAATCCAGCCCACCTTGTTGGGGGGAAGATTGTTGGTAGAGTTTAAGAGCTAAGCTGTAGGAAAGGGATCACCGTTC
TM1	A1	Targeting	CD1D_+_158150298.23-P1P2	TGCAAGTGTACAAATCCAGCCCACCTTGTTGGTGAGAGAACTGGATTAGGTGTTTAAGAGCTAAGCTGTAGGAAAGGGATCACCGTTC
TM1	A1	Targeting	CD1D_+_158150442.23-P1P2	TGCAAGTGTACAAATCCAGCCCACCTTGTTGGTTTAGCAGTACATGTCTCTGTTTAAGAGCTAAGCTGTAGGAAAGGGATCACCGTTC
TM1	A1	Targeting	CD1D_+_158150575.23-P1P2	TGCAAGTGTACAAATCCAGCCCACCTTGTTGGGAGACTTTGGGTCAACGTGGTTTAAGAGCTAAGCTGTAGGAAAGGGATCACCGTTC
TM1	A1	Targeting	CD1D_+_158150664.23-P1P2	TGCAAGTGTACAAATCCAGCCCACCTTGTTGGGCAAAGAGGTCGGGGTCCCGTTTAAGAGCTAAGCTGTAGGAAAGGGATCACCGTTC
TM1	A1	Targeting	CD1D_+_158150672.23-P1P2	TGCAAGTGTACAAATCCAGCCCACCTTGTTGGTGCGAGCTGCAAAGAGGTCGTTTAAGAGCTAAGCTGTAGGAAAGGGATCACCGTTC
TM1	A1	Targeting	CD1D_-_158150158.23-P1P2	TGCAAGTGTACAAATCCAGCCCACCTTGTTGGAGAGGAGGAAGAGAGTCTGGTTTAAGAGCTAAGCTGTAGGAAAGGGATCACCGTTC
TM1	A1	Targeting	CD1D_-_158150183.23-P1P2	TGCAAGTGTACAAATCCAGCCCACCTTGTTGGCGTCCCCAAAAAGGAGACAGTTTAAGAGCTAAGCTGTAGGAAAGGGATCACCGTTC
TM1	A1	Targeting	CD1D_-_158150272.23-P1P2	TGCAAGTGTACAAATCCAGCCCACCTTGTTGGACTGAGGTGGAGGAATCCTGTTTAAGAGCTAAGCTGTAGGAAAGGGATCACCGTTC
TM1	A1	Targeting	CD1D_-_158150669.23-P1P2	TGCAAGTGTACAAATCCAGCCCACCTTGTTGGCGGCGGCGCCAGGATTCCTGTTTAAGAGCTAAGCTGTAGGAAAGGGATCACCGTTC
TM1	A1	Targeting	CD1D_-_158150703.23-P1P2	TGCAAGTGTACAAATCCAGCCCACCTTGTTGGTTGCAGCTCGCACAGCTAAGTTTAAGAGCTAAGCTGTAGGAAAGGGATCACCGTTC
TM1	A1	Targeting	CD1E_+_158323449.23-P1P2	TGCAAGTGTACAAATCCAGCCCACCTTGTTGGTAAAACAAAGTCTGTGGTCGTTTAAGAGCTAAGCTGTAGGAAAGGGATCACCGTTC
TM1	A1	Targeting	CD1E_+_158323473.23-P1P2	TGCAAGTGTACAAATCCAGCCCACCTTGTTGGACTGCTGGAAAACGAGTCCGTTTAAGAGCTAAGCTGTAGGAAAGGGATCACCGTTC
TM1	A1	Targeting	CD1E_-_158323213.23-P1P2	TGCAAGTGTACAAATCCAGCCCACCTTGTTGGCAGAGAGTTGGATTATGGAGTTTAAGAGCTAAGCTGTAGGAAAGGGATCACCGTTC
TM1	A1	Targeting	CD1E_-_158323326.23-P1P2	TGCAAGTGTACAAATCCAGCCCACCTTGTTGGATCACAGAGAGGTAGAAGTGTTTAAGAGCTAAGCTGTAGGAAAGGGATCACCGTTC
TM1	A1	Targeting	CD1E_-_158323511.23-P1P2	TGCAAGTGTACAAATCCAGCCCACCTTGTTGGGCAGTTAGTGCAATTAGGGGTTTAAGAGCTAAGCTGTAGGAAAGGGATCACCGTTC
TM1	A1	Targeting	CD1E_-_158323516.23-P1P2	TGCAAGTGTACAAATCCAGCCCACCTTGTTGGTAGTGCAATTAGGGAGGTTGTTTAAGAGCTAAGCTGTAGGAAAGGGATCACCGTTC
TM1	A1	Targeting	CD1E_-_158323536.23-P1P2	TGCAAGTGTACAAATCCAGCCCACCTTGTTGGGGAGGATGTACACAAGAGCGTTTAAGAGCTAAGCTGTAGGAAAGGGATCACCGTTC
TM1	A1	Targeting	CD1E_-_158323594.23-P1P2	TGCAAGTGTACAAATCCAGCCCACCTTGTTGGGGGAAATGAAAAACCCCGTGTTTAAGAGCTAAGCTGTAGGAAAGGGATCACCGTTC
TM1	A1	Targeting	CD1E_-_158323613.23-P1P2	TGCAAGTGTACAAATCCAGCCCACCTTGTTGGGGGAGGCTGCAGCAAAGCGGTTTAAGAGCTAAGCTGTAGGAAAGGGATCACCGTTC
TM1	A1	Targeting	CD1E_-_158323648.23-P1P2	TGCAAGTGTACAAATCCAGCCCACCTTGTTGGCTGACAGGGAAGTCAGCAGGTTTAAGAGCTAAGCTGTAGGAAAGGGATCACCGTTC
TM1	A1	Targeting	CD200R1L_+_112565853.23-P1P2	TGCAAGTGTACAAATCCAGCCCACCTTGTTGGGGAGCTATAAGTAACAAAGGTTTAAGAGCTAAGCTGTAGGAAAGGGATCACCGTTC
TM1	A1	Targeting	CD200R1L_+_112565992.23-P1P2	TGCAAGTGTACAAATCCAGCCCACCTTGTTGGGCTAAGGCACAGGGTTCTCGTTTAAGAGCTAAGCTGTAGGAAAGGGATCACCGTTC
TM1	A1	Targeting	CD200R1L_-_112565841.23-P1P2	TGCAAGTGTACAAATCCAGCCCACCTTGTTGGAACATGAAGACTCTTGGATGTTTAAGAGCTAAGCTGTAGGAAAGGGATCACCGTTC
TM1	A1	Targeting	CD200R1L_-_112565848.23-P1P2	TGCAAGTGTACAAATCCAGCCCACCTTGTTGGAGACTCTTGGATAGGTGAAGTTTAAGAGCTAAGCTGTAGGAAAGGGATCACCGTTC
TM1	A1	Targeting	CD200R1L_-_112565923.23-P1P2	TGCAAGTGTACAAATCCAGCCCACCTTGTTGGCACACAGTGGTTGCACACAGTTTAAGAGCTAAGCTGTAGGAAAGGGATCACCGTTC
TM1	A1	Targeting	CD200R1L_-_112565943.23-P1P2	TGCAAGTGTACAAATCCAGCCCACCTTGTTGGGGACAGGGTAACAACACACGTTTAAGAGCTAAGCTGTAGGAAAGGGATCACCGTTC
TM1	A1	Targeting	CD200R1L_-_112565969.23-P1P2	TGCAAGTGTACAAATCCAGCCCACCTTGTTGGGTAGAGAGTACCTTATATAGTTTAAGAGCTAAGCTGTAGGAAAGGGATCACCGTTC
TM1	A1	Targeting	CD200R1L_-_112565976.23-P1P2	TGCAAGTGTACAAATCCAGCCCACCTTGTTGGGTACCTTATATATGGTAATGTTTAAGAGCTAAGCTGTAGGAAAGGGATCACCGTTC
TM1	A1	Targeting	CD200R1L_-_112566100.23-P1P2	TGCAAGTGTACAAATCCAGCCCACCTTGTTGGACTTAGCCCTGGGCAATTAGTTTAAGAGCTAAGCTGTAGGAAAGGGATCACCGTTC
TM1	A1	Targeting	CD200R1L_-_112566196.23-P1P2	TGCAAGTGTACAAATCCAGCCCACCTTGTTGGAAGGGGAGCTAACTGTTAGGTTTAAGAGCTAAGCTGTAGGAAAGGGATCACCGTTC
TM1	A1	Targeting	CD200R1_+_112693846.23-P1P2	TGCAAGTGTACAAATCCAGCCCACCTTGTTGGCGTGAAGGAAGGGGCTAGAGTTTAAGAGCTAAGCTGTAGGAAAGGGATCACCGTTC
TM1	A1	Targeting	CD200R1_+_112693855.23-P1P2	TGCAAGTGTACAAATCCAGCCCACCTTGTTGGCCACATAGACGTGAAGGAAGTTTAAGAGCTAAGCTGTAGGAAAGGGATCACCGTTC
TM1	A1	Targeting	CD200R1_+_112693860.23-P1P2	TGCAAGTGTACAAATCCAGCCCACCTTGTTGGCTAAACCACATAGACGTGAGTTTAAGAGCTAAGCTGTAGGAAAGGGATCACCGTTC
TM1	A1	Targeting	CD200R1_+_112694013.23-P1P2	TGCAAGTGTACAAATCCAGCCCACCTTGTTGGTGTGTACAGCAGAAGTGAGGTTTAAGAGCTAAGCTGTAGGAAAGGGATCACCGTTC
TM1	A1	Targeting	CD200R1_+_112694066.23-P1P2	TGCAAGTGTACAAATCCAGCCCACCTTGTTGGTAGACAAATCTGTTTATCTGTTTAAGAGCTAAGCTGTAGGAAAGGGATCACCGTTC
TM1	A1	Targeting	CD200R1_+_112694147.23-P1P2	TGCAAGTGTACAAATCCAGCCCACCTTGTTGGTCTAAAAGTCATCATAATTGTTTAAGAGCTAAGCTGTAGGAAAGGGATCACCGTTC
TM1	A1	Targeting	CD200R1_+_112694177.23-P1P2	TGCAAGTGTACAAATCCAGCCCACCTTGTTGGGCCGTAAAGCTCTTCAACCGTTTAAGAGCTAAGCTGTAGGAAAGGGATCACCGTTC
TM1	A1	Targeting	CD200R1_-_112694053.23-P1P2	TGCAAGTGTACAAATCCAGCCCACCTTGTTGGACAGACAAACTTTACAGTAGTTTAAGAGCTAAGCTGTAGGAAAGGGATCACCGTTC
TM1	A1	Targeting	CD200R1_-_112694181.23-P1P2	TGCAAGTGTACAAATCCAGCCCACCTTGTTGGACTTTTAGAGGCTTTCTCCGTTTAAGAGCTAAGCTGTAGGAAAGGGATCACCGTTC
TM1	A1	Targeting	CD200R1_-_112694216.23-P1P2	TGCAAGTGTACAAATCCAGCCCACCTTGTTGGCGGCCTTAGTATTTGAGTCGTTTAAGAGCTAAGCTGTAGGAAAGGGATCACCGTTC
TM1	A1	Targeting	CD207_+_71063020.23-P1P2	TGCAAGTGTACAAATCCAGCCCACCTTGTTGGTAGTCAGGAATAGGGAAGTGTTTAAGAGCTAAGCTGTAGGAAAGGGATCACCGTTC
TM1	A1	Targeting	CD207_+_71063096.23-P1P2	TGCAAGTGTACAAATCCAGCCCACCTTGTTGGCCCCAGAGAAGACAACAAAGTTTAAGAGCTAAGCTGTAGGAAAGGGATCACCGTTC
TM1	A1	Targeting	CD207_+_71063140.23-P1P2	TGCAAGTGTACAAATCCAGCCCACCTTGTTGGGGATAGGTTTGGGACAAGAGTTTAAGAGCTAAGCTGTAGGAAAGGGATCACCGTTC
TM1	A1	Targeting	CD207_+_71063208.23-P1P2	TGCAAGTGTACAAATCCAGCCCACCTTGTTGGGCACTCAGCCTGTATTTGTGTTTAAGAGCTAAGCTGTAGGAAAGGGATCACCGTTC
TM1	A1	Targeting	CD207_+_71063229.23-P1P2	TGCAAGTGTACAAATCCAGCCCACCTTGTTGGTAGAGCATCAGTACCTAGAGTTTAAGAGCTAAGCTGTAGGAAAGGGATCACCGTTC
TM1	A1	Targeting	CD207_-_71063055.23-P1P2	TGCAAGTGTACAAATCCAGCCCACCTTGTTGGCCTGACTAGATACCTTGTCGTTTAAGAGCTAAGCTGTAGGAAAGGGATCACCGTTC
TM1	A1	Targeting	CD207_-_71063115.23-P1P2	TGCAAGTGTACAAATCCAGCCCACCTTGTTGGGGCCATTTGTTGTCTTCTCGTTTAAGAGCTAAGCTGTAGGAAAGGGATCACCGTTC
TM1	A1	Targeting	CD207_-_71063130.23-P1P2	TGCAAGTGTACAAATCCAGCCCACCTTGTTGGTCTCTGGGGGTCTGTTACAGTTTAAGAGCTAAGCTGTAGGAAAGGGATCACCGTTC
TM1	A1	Targeting	CD207_-_71063221.23-P1P2	TGCAAGTGTACAAATCCAGCCCACCTTGTTGGCCATTCACCCCACAAATACGTTTAAGAGCTAAGCTGTAGGAAAGGGATCACCGTTC
TM1	A1	Targeting	CD207_-_71063237.23-P1P2	TGCAAGTGTACAAATCCAGCCCACCTTGTTGGTACAGGCTGAGTGCCTTCTGTTTAAGAGCTAAGCTGTAGGAAAGGGATCACCGTTC
TM1	A1	Targeting	CD209_+_7812712.23-P1P2	TGCAAGTGTACAAATCCAGCCCACCTTGTTGGCTACCCTTGCCCTAGTGGAGTTTAAGAGCTAAGCTGTAGGAAAGGGATCACCGTTC
TM1	A1	Targeting	CD209_+_7812745.23-P1P2	TGCAAGTGTACAAATCCAGCCCACCTTGTTGGACAGTGCTTCCAGGAACTGGTTTAAGAGCTAAGCTGTAGGAAAGGGATCACCGTTC
TM1	A1	Targeting	CD209_-_7812517.23-P1P2	TGCAAGTGTACAAATCCAGCCCACCTTGTTGGGAGAAACAGGAAGTTGGGTGTTTAAGAGCTAAGCTGTAGGAAAGGGATCACCGTTC
TM1	A1	Targeting	CD209_-_7812542.23-P1P2	TGCAAGTGTACAAATCCAGCCCACCTTGTTGGCTGTCATCCAAAAGACTAGGTTTAAGAGCTAAGCTGTAGGAAAGGGATCACCGTTC
TM1	A1	Targeting	CD209_-_7812565.23-P1P2	TGCAAGTGTACAAATCCAGCCCACCTTGTTGGAAGCATCAGAGCATGAGATGTTTAAGAGCTAAGCTGTAGGAAAGGGATCACCGTTC
TM1	A1	Targeting	CD209_-_7812588.23-P1P2	TGCAAGTGTACAAATCCAGCCCACCTTGTTGGCGGATCTTTCAAGAATTTCGTTTAAGAGCTAAGCTGTAGGAAAGGGATCACCGTTC
TM1	A1	Targeting	CD209_-_7812598.23-P1P2	TGCAAGTGTACAAATCCAGCCCACCTTGTTGGAAGAATTTCAGGGAGGCAGGTTTAAGAGCTAAGCTGTAGGAAAGGGATCACCGTTC
TM1	A1	Targeting	CD209_-_7812647.23-P1P2	TGCAAGTGTACAAATCCAGCCCACCTTGTTGGGGACTCATCCACTCATGGAGTTTAAGAGCTAAGCTGTAGGAAAGGGATCACCGTTC
TM1	A1	Targeting	CD209_-_7812723.23-P1P2	TGCAAGTGTACAAATCCAGCCCACCTTGTTGGGTGTTACACCCCCTCCACTGTTTAAGAGCTAAGCTGTAGGAAAGGGATCACCGTTC
TM1	A1	Targeting	CD209_-_7812757.23-P1P2	TGCAAGTGTACAAATCCAGCCCACCTTGTTGGAGGTAGCACCCCCAGTTCCGTTTAAGAGCTAAGCTGTAGGAAAGGGATCACCGTTC
TM1	A1	Targeting	CD226_+_67615151.23-P1P2	TGCAAGTGTACAAATCCAGCCCACCTTGTTGGGGCTGTCAGCGCTGGGCGTGTTTAAGAGCTAAGCTGTAGGAAAGGGATCACCGTTC
TM1	A1	Targeting	CD226_+_67615157.23-P1P2	TGCAAGTGTACAAATCCAGCCCACCTTGTTGGAGGATGGGCTGTCAGCGCTGTTTAAGAGCTAAGCTGTAGGAAAGGGATCACCGTTC
TM1	A1	Targeting	CD226_+_67615237.23-P1P2	TGCAAGTGTACAAATCCAGCCCACCTTGTTGGGGGCTTTTGATCTGTTTTTGTTTAAGAGCTAAGCTGTAGGAAAGGGATCACCGTTC
TM1	A1	Targeting	CD226_+_67615302.23-P1P2	TGCAAGTGTACAAATCCAGCCCACCTTGTTGGGAAGTTAAATCTCTCATAAGTTTAAGAGCTAAGCTGTAGGAAAGGGATCACCGTTC
TM1	A1	Targeting	CD226_+_67615385.23-P1P2	TGCAAGTGTACAAATCCAGCCCACCTTGTTGGTGACCCCTGACAGAACCTGGTTTAAGAGCTAAGCTGTAGGAAAGGGATCACCGTTC
TM1	A1	Targeting	CD226_-_67615147.23-P1P2	TGCAAGTGTACAAATCCAGCCCACCTTGTTGGCAGAGGCTGAAGTGGGCGGGTTTAAGAGCTAAGCTGTAGGAAAGGGATCACCGTTC
TM1	A1	Targeting	CD226_-_67615235.23-P1P2	TGCAAGTGTACAAATCCAGCCCACCTTGTTGGTCAGACATTTGCTTTGATGGTTTAAGAGCTAAGCTGTAGGAAAGGGATCACCGTTC
TM1	A1	Targeting	CD226_-_67615287.23-P1P2	TGCAAGTGTACAAATCCAGCCCACCTTGTTGGACAAAAGTATGCTGGCCCAGTTTAAGAGCTAAGCTGTAGGAAAGGGATCACCGTTC
TM1	A1	Targeting	CD226_-_67615403.23-P1P2	TGCAAGTGTACAAATCCAGCCCACCTTGTTGGTGTCCCCAGGTTCTGTCAGGTTTAAGAGCTAAGCTGTAGGAAAGGGATCACCGTTC
TM1	A1	Targeting	CD226_-_67615667.23-P1P2	TGCAAGTGTACAAATCCAGCCCACCTTGTTGGAGTAAAAATTGGGAAAAGTGTTTAAGAGCTAAGCTGTAGGAAAGGGATCACCGTTC
TM1	A1	Targeting	CD22_+_35819904.23-P1P2	TGCAAGTGTACAAATCCAGCCCACCTTGTTGGGGAAGACTCGAATACGTATGTTTAAGAGCTAAGCTGTAGGAAAGGGATCACCGTTC
TM1	A1	Targeting	CD22_+_35819924.23-P1P2	TGCAAGTGTACAAATCCAGCCCACCTTGTTGGTGCGGGCTCGGAGTCAGATGTTTAAGAGCTAAGCTGTAGGAAAGGGATCACCGTTC
TM1	A1	Targeting	CD22_+_35819950.23-P1P2	TGCAAGTGTACAAATCCAGCCCACCTTGTTGGTGGGGAAAAGAGACGATTGGTTTAAGAGCTAAGCTGTAGGAAAGGGATCACCGTTC
TM1	A1	Targeting	CD22_+_35819969.23-P1P2	TGCAAGTGTACAAATCCAGCCCACCTTGTTGGAGCACCGTGATCTGGGGAGGTTTAAGAGCTAAGCTGTAGGAAAGGGATCACCGTTC
TM1	A1	Targeting	CD22_+_35819974.23-P1P2	TGCAAGTGTACAAATCCAGCCCACCTTGTTGGCAAGCAGCACCGTGATCTGGTTTAAGAGCTAAGCTGTAGGAAAGGGATCACCGTTC
TM1	A1	Targeting	CD22_+_35820009.23-P1P2	TGCAAGTGTACAAATCCAGCCCACCTTGTTGGCACACCCCCTGCTTCTCTAGTTTAAGAGCTAAGCTGTAGGAAAGGGATCACCGTTC
TM1	A1	Targeting	CD22_+_35820046.23-P1P2	TGCAAGTGTACAAATCCAGCCCACCTTGTTGGGTAAAGTCTCTGGTGACAGGTTTAAGAGCTAAGCTGTAGGAAAGGGATCACCGTTC
TM1	A1	Targeting	CD22_-_35819835.23-P1P2	TGCAAGTGTACAAATCCAGCCCACCTTGTTGGTCCTGAGAGCTGGGTAGAGGTTTAAGAGCTAAGCTGTAGGAAAGGGATCACCGTTC
TM1	A1	Targeting	CD22_-_35819895.23-P1P2	TGCAAGTGTACAAATCCAGCCCACCTTGTTGGTGCAAACCCATACACGGAAGTTTAAGAGCTAAGCTGTAGGAAAGGGATCACCGTTC
TM1	A1	Targeting	CD22_-_35820026.23-P1P2	TGCAAGTGTACAAATCCAGCCCACCTTGTTGGAGAGCCATAGAGAAGCAGGGTTTAAGAGCTAAGCTGTAGGAAAGGGATCACCGTTC
TM1	A1	Targeting	CD244_+_160832583.23-P1P2	TGCAAGTGTACAAATCCAGCCCACCTTGTTGGGAGGAAACTGTGGCTGGACGTTTAAGAGCTAAGCTGTAGGAAAGGGATCACCGTTC
TM1	A1	Targeting	CD244_+_160832692.23-P1P2	TGCAAGTGTACAAATCCAGCCCACCTTGTTGGGAGGTAAGCTTCACCAGTTGTTTAAGAGCTAAGCTGTAGGAAAGGGATCACCGTTC
TM1	A1	Targeting	CD244_+_160832858.23-P1P2	TGCAAGTGTACAAATCCAGCCCACCTTGTTGGTCTGTTGGAATGGAACAGTGTTTAAGAGCTAAGCTGTAGGAAAGGGATCACCGTTC
TM1	A1	Targeting	CD244_-_160832719.23-P1P2	TGCAAGTGTACAAATCCAGCCCACCTTGTTGGTGGTGAAGCTTACCTCAAGGTTTAAGAGCTAAGCTGTAGGAAAGGGATCACCGTTC
TM1	A1	Targeting	CD244_-_160832723.23-P1P2	TGCAAGTGTACAAATCCAGCCCACCTTGTTGGGAAGCTTACCTCAAGTGGGGTTTAAGAGCTAAGCTGTAGGAAAGGGATCACCGTTC
TM1	A1	Targeting	CD244_-_160832838.23-P1P2	TGCAAGTGTACAAATCCAGCCCACCTTGTTGGTATATGGAGAGACCCCCATGTTTAAGAGCTAAGCTGTAGGAAAGGGATCACCGTTC
TM1	A1	Targeting	CD244_-_160832893.23-P1P2	TGCAAGTGTACAAATCCAGCCCACCTTGTTGGCCAACAGACATTGTGGAGGGTTTAAGAGCTAAGCTGTAGGAAAGGGATCACCGTTC
TM1	A1	Targeting	CD244_-_160832934.23-P1P2	TGCAAGTGTACAAATCCAGCCCACCTTGTTGGAGGAGTGGGCTGAAACGTAGTTTAAGAGCTAAGCTGTAGGAAAGGGATCACCGTTC
TM1	A1	Targeting	CD244_-_160832940.23-P1P2	TGCAAGTGTACAAATCCAGCCCACCTTGTTGGGGGCTGAAACGTAGGGCCCGTTTAAGAGCTAAGCTGTAGGAAAGGGATCACCGTTC
TM1	A1	Targeting	CD244_-_160832964.23-P1P2	TGCAAGTGTACAAATCCAGCCCACCTTGTTGGAAGCGGCTAACAGTGTTGAGTTTAAGAGCTAAGCTGTAGGAAAGGGATCACCGTTC
TM1	A1	Targeting	CD247_+_167487833.23-P1P2	TGCAAGTGTACAAATCCAGCCCACCTTGTTGGTCGGCAGGTGCTTTCTCAAGTTTAAGAGCTAAGCTGTAGGAAAGGGATCACCGTTC
TM1	A1	Targeting	CD247_+_167487876.23-P1P2	TGCAAGTGTACAAATCCAGCCCACCTTGTTGGCTGCCTGTGAACCGAAAGGGTTTAAGAGCTAAGCTGTAGGAAAGGGATCACCGTTC
TM1	A1	Targeting	CD247_+_167487879.23-P1P2	TGCAAGTGTACAAATCCAGCCCACCTTGTTGGTTCCTGCCTGTGAACCGAAGTTTAAGAGCTAAGCTGTAGGAAAGGGATCACCGTTC
TM1	A1	Targeting	CD247_+_167488140.23-P1P2	TGCAAGTGTACAAATCCAGCCCACCTTGTTGGTGTCCTGGACTCTAATCCAGTTTAAGAGCTAAGCTGTAGGAAAGGGATCACCGTTC
TM1	A1	Targeting	CD247_-_167487830.23-P1P2	TGCAAGTGTACAAATCCAGCCCACCTTGTTGGCCCAGGAAGTGGAGGACTGGTTTAAGAGCTAAGCTGTAGGAAAGGGATCACCGTTC
TM1	A1	Targeting	CD247_-_167487859.23-P1P2	TGCAAGTGTACAAATCCAGCCCACCTTGTTGGGAGAAAGCACCTGCCGACAGTTTAAGAGCTAAGCTGTAGGAAAGGGATCACCGTTC
TM1	A1	Targeting	CD247_-_167487894.23-P1P2	TGCAAGTGTACAAATCCAGCCCACCTTGTTGGACTCCCCCTTTCGGTTCACGTTTAAGAGCTAAGCTGTAGGAAAGGGATCACCGTTC
TM1	A1	Targeting	CD247_-_167487918.23-P1P2	TGCAAGTGTACAAATCCAGCCCACCTTGTTGGGGAAGCCCTGGAGGTTTGAGTTTAAGAGCTAAGCTGTAGGAAAGGGATCACCGTTC
TM1	A1	Targeting	CD247_-_167487924.23-P1P2	TGCAAGTGTACAAATCCAGCCCACCTTGTTGGCCTGGAGGTTTGAGGGTTTGTTTAAGAGCTAAGCTGTAGGAAAGGGATCACCGTTC
TM1	A1	Targeting	CD247_-_167488073.23-P1P2	TGCAAGTGTACAAATCCAGCCCACCTTGTTGGGGCAAATACAAGTTCTCGAGTTTAAGAGCTAAGCTGTAGGAAAGGGATCACCGTTC
TM1	A1	Targeting	CD248_+_66084656.23-P1P2	TGCAAGTGTACAAATCCAGCCCACCTTGTTGGCCTGCTCTAGCGGCCCCCGGTTTAAGAGCTAAGCTGTAGGAAAGGGATCACCGTTC
TM1	A1	Targeting	CD248_+_66084805.23-P1P2	TGCAAGTGTACAAATCCAGCCCACCTTGTTGGGCCCCGAGCCCCAACTTGAGTTTAAGAGCTAAGCTGTAGGAAAGGGATCACCGTTC
TM1	A1	Targeting	CD248_+_66084862.23-P1P2	TGCAAGTGTACAAATCCAGCCCACCTTGTTGGGGGCTGCTGTGTCCAGATTGTTTAAGAGCTAAGCTGTAGGAAAGGGATCACCGTTC
TM1	A1	Targeting	CD248_+_66084881.23-P1P2	TGCAAGTGTACAAATCCAGCCCACCTTGTTGGACTGCTCCCGGGTGTGATGGTTTAAGAGCTAAGCTGTAGGAAAGGGATCACCGTTC
TM1	A1	Targeting	CD248_-_66084556.23-P1P2	TGCAAGTGTACAAATCCAGCCCACCTTGTTGGGCAGCTCTTGACAGGGGGAGTTTAAGAGCTAAGCTGTAGGAAAGGGATCACCGTTC
TM1	A1	Targeting	CD248_-_66084617.23-P1P2	TGCAAGTGTACAAATCCAGCCCACCTTGTTGGGCCGGGCTCAGGCCTTGTAGTTTAAGAGCTAAGCTGTAGGAAAGGGATCACCGTTC
TM1	A1	Targeting	CD248_-_66084623.23-P1P2	TGCAAGTGTACAAATCCAGCCCACCTTGTTGGCTCAGGCCTTGTAAGGAGTGTTTAAGAGCTAAGCTGTAGGAAAGGGATCACCGTTC
TM1	A1	Targeting	CD248_-_66084629.23-P1P2	TGCAAGTGTACAAATCCAGCCCACCTTGTTGGCCTTGTAAGGAGTGGGCTGGTTTAAGAGCTAAGCTGTAGGAAAGGGATCACCGTTC
TM1	A1	Targeting	CD248_-_66084710.23-P1P2	TGCAAGTGTACAAATCCAGCCCACCTTGTTGGTGGGGGGCTCTAAGGTTGGGTTTAAGAGCTAAGCTGTAGGAAAGGGATCACCGTTC
TM1	A1	Targeting	CD248_-_66084739.23-P1P2	TGCAAGTGTACAAATCCAGCCCACCTTGTTGGGGGGAGAAGGCGCAGTTGAGTTTAAGAGCTAAGCTGTAGGAAAGGGATCACCGTTC
TM1	A1	Targeting	CD274_+_5450379.23-P1P2	TGCAAGTGTACAAATCCAGCCCACCTTGTTGGCAGTTTAGGTATCTAGTGTGTTTAAGAGCTAAGCTGTAGGAAAGGGATCACCGTTC
TM1	A1	Targeting	CD274_+_5450392.23-P1P2	TGCAAGTGTACAAATCCAGCCCACCTTGTTGGCGGCGGAAGCTTTCAGTTTGTTTAAGAGCTAAGCTGTAGGAAAGGGATCACCGTTC
TM1	A1	Targeting	CD274_+_5450411.23-P1P2	TGCAAGTGTACAAATCCAGCCCACCTTGTTGGTCCTGACCTTCGGTGAAATGTTTAAGAGCTAAGCTGTAGGAAAGGGATCACCGTTC
TM1	A1	Targeting	CD274_+_5450488.23-P1P2	TGCAAGTGTACAAATCCAGCCCACCTTGTTGGGTTGCGCCAGGCCCGGAGGGTTTAAGAGCTAAGCTGTAGGAAAGGGATCACCGTTC
TM1	A1	Targeting	CD274_+_5450491.23-P1P2	TGCAAGTGTACAAATCCAGCCCACCTTGTTGGAGCGTTGCGCCAGGCCCGGGTTTAAGAGCTAAGCTGTAGGAAAGGGATCACCGTTC
TM1	A1	Targeting	CD274_-_5450195.23-P1P2	TGCAAGTGTACAAATCCAGCCCACCTTGTTGGTAAGCTCTTACCCCTCTGAGTTTAAGAGCTAAGCTGTAGGAAAGGGATCACCGTTC
TM1	A1	Targeting	CD274_-_5450206.23-P1P2	TGCAAGTGTACAAATCCAGCCCACCTTGTTGGCCCTCTGAAGGTAAAATCAGTTTAAGAGCTAAGCTGTAGGAAAGGGATCACCGTTC
TM1	A1	Targeting	CD274_-_5450426.23-P1P2	TGCAAGTGTACAAATCCAGCCCACCTTGTTGGCTTCCGCCGATTTCACCGAGTTTAAGAGCTAAGCTGTAGGAAAGGGATCACCGTTC
TM1	A1	Targeting	CD274_-_5450447.23-P1P2	TGCAAGTGTACAAATCCAGCCCACCTTGTTGGGTCAGGAAAGTCCAACGCCGTTTAAGAGCTAAGCTGTAGGAAAGGGATCACCGTTC
TM1	A1	Targeting	CD274_-_5450470.23-P1P2	TGCAAGTGTACAAATCCAGCCCACCTTGTTGGAAACTGGATTTGCTGCCTTGTTTAAGAGCTAAGCTGTAGGAAAGGGATCACCGTTC
TM1	A1	Targeting	CD276_+_73976496.23-P1P2	TGCAAGTGTACAAATCCAGCCCACCTTGTTGGCCCTGGCGGGGAAAACCCTGTTTAAGAGCTAAGCTGTAGGAAAGGGATCACCGTTC
TM1	A1	Targeting	CD276_+_73976570.23-P1P2	TGCAAGTGTACAAATCCAGCCCACCTTGTTGGAGGCCTGAGCCAGCCCGCTGTTTAAGAGCTAAGCTGTAGGAAAGGGATCACCGTTC
TM1	A1	Targeting	CD276_+_73976616.23-P1P2	TGCAAGTGTACAAATCCAGCCCACCTTGTTGGTGCGTCCCTGAGGCCGGATGTTTAAGAGCTAAGCTGTAGGAAAGGGATCACCGTTC
TM1	A1	Targeting	CD276_+_73976625.23-P1P2	TGCAAGTGTACAAATCCAGCCCACCTTGTTGGCGGCTCCGGTGCGTCCCTGGTTTAAGAGCTAAGCTGTAGGAAAGGGATCACCGTTC
TM1	A1	Targeting	CD276_+_73976638.23-P1P2	TGCAAGTGTACAAATCCAGCCCACCTTGTTGGAGGCCCGGAAAGGCGGCTCGTTTAAGAGCTAAGCTGTAGGAAAGGGATCACCGTTC
TM1	A1	Targeting	CD276_+_73976657.23-P1P2	TGCAAGTGTACAAATCCAGCCCACCTTGTTGGGCGCCGGAGAATCCGCCTGGTTTAAGAGCTAAGCTGTAGGAAAGGGATCACCGTTC
TM1	A1	Targeting	CD276_+_73976691.23-P1P2	TGCAAGTGTACAAATCCAGCCCACCTTGTTGGGGCGGCCCGGGGAGTCCGAGTTTAAGAGCTAAGCTGTAGGAAAGGGATCACCGTTC
TM1	A1	Targeting	CD276_-_73976185.23-P1P2	TGCAAGTGTACAAATCCAGCCCACCTTGTTGGGGGCTGGTCGGATGGCCGTGTTTAAGAGCTAAGCTGTAGGAAAGGGATCACCGTTC
TM1	A1	Targeting	CD276_-_73976361.23-P1P2	TGCAAGTGTACAAATCCAGCCCACCTTGTTGGAAGAACCCAAGACTGGGGTGTTTAAGAGCTAAGCTGTAGGAAAGGGATCACCGTTC
TM1	A1	Targeting	CD276_-_73976624.23-P1P2	TGCAAGTGTACAAATCCAGCCCACCTTGTTGGCGCCACCGCGGGGCCAATCGTTTAAGAGCTAAGCTGTAGGAAAGGGATCACCGTTC
TM1	A1	Targeting	CD27_+_6553710.23-P1P2	TGCAAGTGTACAAATCCAGCCCACCTTGTTGGGAGAACCAGAATTGAGCACGTTTAAGAGCTAAGCTGTAGGAAAGGGATCACCGTTC
TM1	A1	Targeting	CD27_-_6553779.23-P1P2	TGCAAGTGTACAAATCCAGCCCACCTTGTTGGAAAGGAGGGATGCAGGTATGTTTAAGAGCTAAGCTGTAGGAAAGGGATCACCGTTC
TM1	A1	Targeting	CD27_-_6553823.23-P1P2	TGCAAGTGTACAAATCCAGCCCACCTTGTTGGTCTGTAAACTGTGGACGGGGTTTAAGAGCTAAGCTGTAGGAAAGGGATCACCGTTC
TM1	A1	Targeting	CD27_-_6553827.23-P1P2	TGCAAGTGTACAAATCCAGCCCACCTTGTTGGTAAACTGTGGACGGGGGGGGTTTAAGAGCTAAGCTGTAGGAAAGGGATCACCGTTC
TM1	A1	Targeting	CD27_-_6553847.23-P1P2	TGCAAGTGTACAAATCCAGCCCACCTTGTTGGGGGTGGGGGGGGGTAACGTGTTTAAGAGCTAAGCTGTAGGAAAGGGATCACCGTTC
TM1	A1	Targeting	CD27_-_6553875.23-P1P2	TGCAAGTGTACAAATCCAGCCCACCTTGTTGGTGTGCACAAGTGCATGAATGTTTAAGAGCTAAGCTGTAGGAAAGGGATCACCGTTC
TM1	A1	Targeting	CD27_-_6553879.23-P1P2	TGCAAGTGTACAAATCCAGCCCACCTTGTTGGCACAAGTGCATGAATAGGAGTTTAAGAGCTAAGCTGTAGGAAAGGGATCACCGTTC
TM1	A1	Targeting	CD27_-_6553932.23-P1P2	TGCAAGTGTACAAATCCAGCCCACCTTGTTGGCAAAGAAGCAGGAGTCAGTGTTTAAGAGCTAAGCTGTAGGAAAGGGATCACCGTTC
TM1	A1	Targeting	CD27_-_6553957.23-P1P2	TGCAAGTGTACAAATCCAGCCCACCTTGTTGGCGTGCTTCATGAGCAGGAGGTTTAAGAGCTAAGCTGTAGGAAAGGGATCACCGTTC
TM1	A1	Targeting	CD27_-_6554063.23-P1P2	TGCAAGTGTACAAATCCAGCCCACCTTGTTGGCCAGCACACGGAAGGGGAAGTTTAAGAGCTAAGCTGTAGGAAAGGGATCACCGTTC
TM1	A1	Targeting	CD28_+_204571129.23-P1P2	TGCAAGTGTACAAATCCAGCCCACCTTGTTGGTAGTCGGTCACTACATGATGTTTAAGAGCTAAGCTGTAGGAAAGGGATCACCGTTC
TM1	A1	Targeting	CD28_+_204571222.23-P1P2	TGCAAGTGTACAAATCCAGCCCACCTTGTTGGTGACTGCAGCATTTCACACGTTTAAGAGCTAAGCTGTAGGAAAGGGATCACCGTTC
TM1	A1	Targeting	CD28_+_204571249.23-P1P2	TGCAAGTGTACAAATCCAGCCCACCTTGTTGGTCAAGGCACTCAAACCACAGTTTAAGAGCTAAGCTGTAGGAAAGGGATCACCGTTC
TM1	A1	Targeting	CD28_+_204571278.23-P1P2	TGCAAGTGTACAAATCCAGCCCACCTTGTTGGCACCGCCACCATCCCCTTAGTTTAAGAGCTAAGCTGTAGGAAAGGGATCACCGTTC
TM1	A1	Targeting	CD28_+_204571307.23-P1P2	TGCAAGTGTACAAATCCAGCCCACCTTGTTGGTGAGAGTCTCCGTCATCCAGTTTAAGAGCTAAGCTGTAGGAAAGGGATCACCGTTC
TM1	A1	Targeting	CD28_-_204571256.23-P1P2	TGCAAGTGTACAAATCCAGCCCACCTTGTTGGCTGCAGTCAGGATGCCTTGGTTTAAGAGCTAAGCTGTAGGAAAGGGATCACCGTTC
TM1	A1	Targeting	CD28_-_204571286.23-P1P2	TGCAAGTGTACAAATCCAGCCCACCTTGTTGGCCTTGATCATGTGCCCTAAGTTTAAGAGCTAAGCTGTAGGAAAGGGATCACCGTTC
TM1	A1	Targeting	CD28_-_204571291.23-P1P2	TGCAAGTGTACAAATCCAGCCCACCTTGTTGGATCATGTGCCCTAAGGGGAGTTTAAGAGCTAAGCTGTAGGAAAGGGATCACCGTTC
TM1	A1	Targeting	CD28_-_204571294.23-P1P2	TGCAAGTGTACAAATCCAGCCCACCTTGTTGGATGTGCCCTAAGGGGATGGGTTTAAGAGCTAAGCTGTAGGAAAGGGATCACCGTTC
TM1	A1	Targeting	CD28_-_204571297.23-P1P2	TGCAAGTGTACAAATCCAGCCCACCTTGTTGGTGCCCTAAGGGGATGGTGGGTTTAAGAGCTAAGCTGTAGGAAAGGGATCACCGTTC
TM1	A1	Targeting	CD2_+_117296789.23-P1P2	TGCAAGTGTACAAATCCAGCCCACCTTGTTGGGAGGCTAAGTAGATCACTAGTTTAAGAGCTAAGCTGTAGGAAAGGGATCACCGTTC
TM1	A1	Targeting	CD2_+_117297046.23-P1P2	TGCAAGTGTACAAATCCAGCCCACCTTGTTGGGGAACTGAAGTGAGACTGGGTTTAAGAGCTAAGCTGTAGGAAAGGGATCACCGTTC
TM1	A1	Targeting	CD2_-_117296739.23-P1P2	TGCAAGTGTACAAATCCAGCCCACCTTGTTGGTAGGGACAGTATACCTAAGGTTTAAGAGCTAAGCTGTAGGAAAGGGATCACCGTTC
TM1	A1	Targeting	CD2_-_117296747.23-P1P2	TGCAAGTGTACAAATCCAGCCCACCTTGTTGGGTATACCTAAGTGGATAAAGTTTAAGAGCTAAGCTGTAGGAAAGGGATCACCGTTC
TM1	A1	Targeting	CD2_-_117296765.23-P1P2	TGCAAGTGTACAAATCCAGCCCACCTTGTTGGAAGGCTGTGTGGTTGAATTGTTTAAGAGCTAAGCTGTAGGAAAGGGATCACCGTTC
TM1	A1	Targeting	CD2_-_117296921.23-P1P2	TGCAAGTGTACAAATCCAGCCCACCTTGTTGGCTCATAAACACATCTGCTTGTTTAAGAGCTAAGCTGTAGGAAAGGGATCACCGTTC
TM1	A1	Targeting	CD2_-_117296927.23-P1P2	TGCAAGTGTACAAATCCAGCCCACCTTGTTGGAACACATCTGCTTTGGCAAGTTTAAGAGCTAAGCTGTAGGAAAGGGATCACCGTTC
TM1	A1	Targeting	CD2_-_117296942.23-P1P2	TGCAAGTGTACAAATCCAGCCCACCTTGTTGGGCAAAGGAGCACATCAGAAGTTTAAGAGCTAAGCTGTAGGAAAGGGATCACCGTTC
TM1	A1	Targeting	CD2_-_117297037.23-P1P2	TGCAAGTGTACAAATCCAGCCCACCTTGTTGGGCACGTGGTTAAGCTCTCGGTTTAAGAGCTAAGCTGTAGGAAAGGGATCACCGTTC
TM1	A1	Targeting	CD2_-_117297042.23-P1P2	TGCAAGTGTACAAATCCAGCCCACCTTGTTGGTGGTTAAGCTCTCGGGGTGGTTTAAGAGCTAAGCTGTAGGAAAGGGATCACCGTTC
TM1	A1	Targeting	CD300A_+_72462452.23-P1P2	TGCAAGTGTACAAATCCAGCCCACCTTGTTGGTGGTCAAGGTGGGCAACCCGTTTAAGAGCTAAGCTGTAGGAAAGGGATCACCGTTC
TM1	A1	Targeting	CD300A_+_72462505.23-P1P2	TGCAAGTGTACAAATCCAGCCCACCTTGTTGGTCCCCGGGTCTCCTCCTAGGTTTAAGAGCTAAGCTGTAGGAAAGGGATCACCGTTC
TM1	A1	Targeting	CD300A_+_72462618.23-P1P2	TGCAAGTGTACAAATCCAGCCCACCTTGTTGGGGCACGTCCTCCTTAACGCGTTTAAGAGCTAAGCTGTAGGAAAGGGATCACCGTTC
TM1	A1	Targeting	CD300A_+_72462781.23-P1P2	TGCAAGTGTACAAATCCAGCCCACCTTGTTGGAGGCCCTACCTGGACCCGAGTTTAAGAGCTAAGCTGTAGGAAAGGGATCACCGTTC
TM1	A1	Targeting	CD300A_-_72462363.23-P1P2	TGCAAGTGTACAAATCCAGCCCACCTTGTTGGTGGACCTCCAAGGGACTCAGTTTAAGAGCTAAGCTGTAGGAAAGGGATCACCGTTC
TM1	A1	Targeting	CD300A_-_72462421.23-P1P2	TGCAAGTGTACAAATCCAGCCCACCTTGTTGGTCCTCGTGGGCACCACCGAGTTTAAGAGCTAAGCTGTAGGAAAGGGATCACCGTTC
TM1	A1	Targeting	CD300A_-_72462540.23-P1P2	TGCAAGTGTACAAATCCAGCCCACCTTGTTGGCCCGGGGAAGTGAGAGTCGGTTTAAGAGCTAAGCTGTAGGAAAGGGATCACCGTTC
TM1	A1	Targeting	CD300A_-_72462560.23-P1P2	TGCAAGTGTACAAATCCAGCCCACCTTGTTGGGGATCAGTCCTGCAAGCTAGTTTAAGAGCTAAGCTGTAGGAAAGGGATCACCGTTC
TM1	A1	Targeting	CD300A_-_72462573.23-P1P2	TGCAAGTGTACAAATCCAGCCCACCTTGTTGGAAGCTACGGAGTCACTACAGTTTAAGAGCTAAGCTGTAGGAAAGGGATCACCGTTC
TM1	A1	Targeting	CD300A_-_72462799.23-P1P2	TGCAAGTGTACAAATCCAGCCCACCTTGTTGGTTCCCCTCGGGTCCAGGTAGTTTAAGAGCTAAGCTGTAGGAAAGGGATCACCGTTC
TM1	A1	Targeting	CD300C_+_72542302.23-P1P2	TGCAAGTGTACAAATCCAGCCCACCTTGTTGGGGAAGTGACATGTCACAGAGTTTAAGAGCTAAGCTGTAGGAAAGGGATCACCGTTC
TM1	A1	Targeting	CD300C_+_72542364.23-P1P2	TGCAAGTGTACAAATCCAGCCCACCTTGTTGGCCTCCAAGGCTAAAGAAGGGTTTAAGAGCTAAGCTGTAGGAAAGGGATCACCGTTC
TM1	A1	Targeting	CD300C_+_72542389.23-P1P2	TGCAAGTGTACAAATCCAGCCCACCTTGTTGGAAGGGACACAACCTCTCTCGTTTAAGAGCTAAGCTGTAGGAAAGGGATCACCGTTC
TM1	A1	Targeting	CD300C_+_72542407.23-P1P2	TGCAAGTGTACAAATCCAGCCCACCTTGTTGGGGGACCTAGCTGAAGATTAGTTTAAGAGCTAAGCTGTAGGAAAGGGATCACCGTTC
TM1	A1	Targeting	CD300C_+_72542445.23-P1P2	TGCAAGTGTACAAATCCAGCCCACCTTGTTGGAAGAAGAGCTGGGGGTCTTGTTTAAGAGCTAAGCTGTAGGAAAGGGATCACCGTTC
TM1	A1	Targeting	CD300C_+_72542494.23-P1P2	TGCAAGTGTACAAATCCAGCCCACCTTGTTGGGGGACATGCAGATGGTGTCGTTTAAGAGCTAAGCTGTAGGAAAGGGATCACCGTTC
TM1	A1	Targeting	CD300C_-_72542293.23-P1P2	TGCAAGTGTACAAATCCAGCCCACCTTGTTGGGGGCCATTTCCTACCACATGTTTAAGAGCTAAGCTGTAGGAAAGGGATCACCGTTC
TM1	A1	Targeting	CD300C_-_72542347.23-P1P2	TGCAAGTGTACAAATCCAGCCCACCTTGTTGGGTCAGGATGGACAATCTTGGTTTAAGAGCTAAGCTGTAGGAAAGGGATCACCGTTC
TM1	A1	Targeting	CD300C_-_72542354.23-P1P2	TGCAAGTGTACAAATCCAGCCCACCTTGTTGGTGGACAATCTTGTGGTTGGGTTTAAGAGCTAAGCTGTAGGAAAGGGATCACCGTTC
TM1	A1	Targeting	CD300C_-_72542782.23-P1P2	TGCAAGTGTACAAATCCAGCCCACCTTGTTGGTGAGCCAGCACACACCCCAGTTTAAGAGCTAAGCTGTAGGAAAGGGATCACCGTTC
TM1	A1	Targeting	CD300E_+_72619831.23-P1P2	TGCAAGTGTACAAATCCAGCCCACCTTGTTGGAGTAGAAAGTGGATGACCCGTTTAAGAGCTAAGCTGTAGGAAAGGGATCACCGTTC
TM1	A1	Targeting	CD300E_+_72619841.23-P1P2	TGCAAGTGTACAAATCCAGCCCACCTTGTTGGAACTTGGACAAGTAGAAAGGTTTAAGAGCTAAGCTGTAGGAAAGGGATCACCGTTC
TM1	A1	Targeting	CD300E_+_72619864.23-P1P2	TGCAAGTGTACAAATCCAGCCCACCTTGTTGGTAGATGAGTGAGAACACAAGTTTAAGAGCTAAGCTGTAGGAAAGGGATCACCGTTC
TM1	A1	Targeting	CD300E_+_72619915.23-P1P2	TGCAAGTGTACAAATCCAGCCCACCTTGTTGGCTAAGTAAGGCTTAAAATTGTTTAAGAGCTAAGCTGTAGGAAAGGGATCACCGTTC
TM1	A1	Targeting	CD300E_+_72620038.23-P1P2	TGCAAGTGTACAAATCCAGCCCACCTTGTTGGCCGAGTCATGAAATCTCAGGTTTAAGAGCTAAGCTGTAGGAAAGGGATCACCGTTC
TM1	A1	Targeting	CD300E_+_72620079.23-P1P2	TGCAAGTGTACAAATCCAGCCCACCTTGTTGGTTGGAGAGGTTTCGTAAACGTTTAAGAGCTAAGCTGTAGGAAAGGGATCACCGTTC
TM1	A1	Targeting	CD300E_+_72620139.23-P1P2	TGCAAGTGTACAAATCCAGCCCACCTTGTTGGCGATGAAGTAATCCCAGATGTTTAAGAGCTAAGCTGTAGGAAAGGGATCACCGTTC
TM1	A1	Targeting	CD300E_+_72620242.23-P1P2	TGCAAGTGTACAAATCCAGCCCACCTTGTTGGAACGGTTGAGAAAGACATGGTTTAAGAGCTAAGCTGTAGGAAAGGGATCACCGTTC
TM1	A1	Targeting	CD300E_+_72620259.23-P1P2	TGCAAGTGTACAAATCCAGCCCACCTTGTTGGGTCATCCGCATGGAGATAAGTTTAAGAGCTAAGCTGTAGGAAAGGGATCACCGTTC
TM1	A1	Targeting	CD300E_-_72620168.23-P1P2	TGCAAGTGTACAAATCCAGCCCACCTTGTTGGGGATTACTTCATCGATCTAGTTTAAGAGCTAAGCTGTAGGAAAGGGATCACCGTTC
TM1	A1	Targeting	CD300LB_+_72527634.23-P1P2	TGCAAGTGTACAAATCCAGCCCACCTTGTTGGGAACTACCCACTCTATAAAGTTTAAGAGCTAAGCTGTAGGAAAGGGATCACCGTTC
TM1	A1	Targeting	CD300LB_+_72527895.23-P1P2	TGCAAGTGTACAAATCCAGCCCACCTTGTTGGACCCATCCGACATCTGAGTGTTTAAGAGCTAAGCTGTAGGAAAGGGATCACCGTTC
TM1	A1	Targeting	CD300LB_-_72527746.23-P1P2	TGCAAGTGTACAAATCCAGCCCACCTTGTTGGTCACTATGTAAAAAAGAGGGTTTAAGAGCTAAGCTGTAGGAAAGGGATCACCGTTC
TM1	A1	Targeting	CD300LB_-_72527771.23-P1P2	TGCAAGTGTACAAATCCAGCCCACCTTGTTGGGGGACTGTGCAGGGTCTTTGTTTAAGAGCTAAGCTGTAGGAAAGGGATCACCGTTC
TM1	A1	Targeting	CD300LB_-_72527777.23-P1P2	TGCAAGTGTACAAATCCAGCCCACCTTGTTGGGTGCAGGGTCTTTAGGGTAGTTTAAGAGCTAAGCTGTAGGAAAGGGATCACCGTTC
TM1	A1	Targeting	CD300LB_-_72527798.23-P1P2	TGCAAGTGTACAAATCCAGCCCACCTTGTTGGGGGAGATACGTCTGCAGAAGTTTAAGAGCTAAGCTGTAGGAAAGGGATCACCGTTC
TM1	A1	Targeting	CD300LB_-_72527841.23-P1P2	TGCAAGTGTACAAATCCAGCCCACCTTGTTGGCTAGCAGGCCTTGGGTCCAGTTTAAGAGCTAAGCTGTAGGAAAGGGATCACCGTTC
TM1	A1	Targeting	CD300LB_-_72527857.23-P1P2	TGCAAGTGTACAAATCCAGCCCACCTTGTTGGCCAAGGGGTATAACACTCTGTTTAAGAGCTAAGCTGTAGGAAAGGGATCACCGTTC
TM1	A1	Targeting	CD300LB_-_72527915.23-P1P2	TGCAAGTGTACAAATCCAGCCCACCTTGTTGGCCCAACTCAGATGTCGGATGTTTAAGAGCTAAGCTGTAGGAAAGGGATCACCGTTC
TM1	A1	Targeting	CD300LB_-_72527925.23-P1P2	TGCAAGTGTACAAATCCAGCCCACCTTGTTGGATGTCGGATGGGTCATGCTGTTTAAGAGCTAAGCTGTAGGAAAGGGATCACCGTTC
TM1	A1	Targeting	CD300LD_+_72588430.23-P1P2	TGCAAGTGTACAAATCCAGCCCACCTTGTTGGACTTGAAGGAGATTCGAGTGTTTAAGAGCTAAGCTGTAGGAAAGGGATCACCGTTC
TM1	A1	Targeting	CD300LD_+_72588465.23-P1P2	TGCAAGTGTACAAATCCAGCCCACCTTGTTGGAAGTAGCTACAGATGTAACGTTTAAGAGCTAAGCTGTAGGAAAGGGATCACCGTTC
TM1	A1	Targeting	CD300LD_+_72588663.23-P1P2	TGCAAGTGTACAAATCCAGCCCACCTTGTTGGCCGCAGCTCCTCAATGCTTGTTTAAGAGCTAAGCTGTAGGAAAGGGATCACCGTTC
TM1	A1	Targeting	CD300LD_+_72588717.23-P1P2	TGCAAGTGTACAAATCCAGCCCACCTTGTTGGTCCCTGCACTCCTCATGGCGTTTAAGAGCTAAGCTGTAGGAAAGGGATCACCGTTC
TM1	A1	Targeting	CD300LD_+_72588721.23-P1P2	TGCAAGTGTACAAATCCAGCCCACCTTGTTGGCCTCTCCCTGCACTCCTCAGTTTAAGAGCTAAGCTGTAGGAAAGGGATCACCGTTC
TM1	A1	Targeting	CD300LD_-_72588611.23-P1P2	TGCAAGTGTACAAATCCAGCCCACCTTGTTGGAATGTGTCCGGGACTGGTCGTTTAAGAGCTAAGCTGTAGGAAAGGGATCACCGTTC
TM1	A1	Targeting	CD300LD_-_72588621.23-P1P2	TGCAAGTGTACAAATCCAGCCCACCTTGTTGGGGACTGGTCAGGTTTGCACGTTTAAGAGCTAAGCTGTAGGAAAGGGATCACCGTTC
TM1	A1	Targeting	CD300LD_-_72588641.23-P1P2	TGCAAGTGTACAAATCCAGCCCACCTTGTTGGGGAGTGCACGTAGGAGCCAGTTTAAGAGCTAAGCTGTAGGAAAGGGATCACCGTTC
TM1	A1	Targeting	CD300LD_-_72588676.23-P1P2	TGCAAGTGTACAAATCCAGCCCACCTTGTTGGAGGAGGAACCCAAGCATTGGTTTAAGAGCTAAGCTGTAGGAAAGGGATCACCGTTC
TM1	A1	Targeting	CD300LD_-_72588728.23-P1P2	TGCAAGTGTACAAATCCAGCCCACCTTGTTGGACGGACAAGGCCAGCCATGGTTTAAGAGCTAAGCTGTAGGAAAGGGATCACCGTTC
TM1	A1	Targeting	CD300LF_+_72709097.23-P1P2	TGCAAGTGTACAAATCCAGCCCACCTTGTTGGACTGAAGGAGGAAGTTCAAGTTTAAGAGCTAAGCTGTAGGAAAGGGATCACCGTTC
TM1	A1	Targeting	CD300LF_+_72709662.23-P1P2	TGCAAGTGTACAAATCCAGCCCACCTTGTTGGGCCAACCCACCAGGTTTGGGTTTAAGAGCTAAGCTGTAGGAAAGGGATCACCGTTC
TM1	A1	Targeting	CD300LF_+_72709665.23-P1P2	TGCAAGTGTACAAATCCAGCCCACCTTGTTGGCCAGCCAACCCACCAGGTTGTTTAAGAGCTAAGCTGTAGGAAAGGGATCACCGTTC
TM1	A1	Targeting	CD300LF_+_72709670.23-P1P2	TGCAAGTGTACAAATCCAGCCCACCTTGTTGGTGCCCCCAGCCAACCCACCGTTTAAGAGCTAAGCTGTAGGAAAGGGATCACCGTTC
TM1	A1	Targeting	CD300LF_-_72709177.23-P1P2	TGCAAGTGTACAAATCCAGCCCACCTTGTTGGGGTGGTTGGTTGGGCACCGGTTTAAGAGCTAAGCTGTAGGAAAGGGATCACCGTTC
TM1	A1	Targeting	CD300LF_-_72709503.23-P1P2	TGCAAGTGTACAAATCCAGCCCACCTTGTTGGTGGAAAGGGTGAAATTTCGGTTTAAGAGCTAAGCTGTAGGAAAGGGATCACCGTTC
TM1	A1	Targeting	CD300LF_-_72709522.23-P1P2	TGCAAGTGTACAAATCCAGCCCACCTTGTTGGAGGCAGTTGACAATGCAAGGTTTAAGAGCTAAGCTGTAGGAAAGGGATCACCGTTC
TM1	A1	Targeting	CD300LF_-_72709575.23-P1P2	TGCAAGTGTACAAATCCAGCCCACCTTGTTGGTCTCTGTACACAGCCACCGGTTTAAGAGCTAAGCTGTAGGAAAGGGATCACCGTTC
TM1	A1	Targeting	CD300LF_-_72709616.23-P1P2	TGCAAGTGTACAAATCCAGCCCACCTTGTTGGTCGTGGCTCCTCTGTCATGGTTTAAGAGCTAAGCTGTAGGAAAGGGATCACCGTTC
TM1	A1	Targeting	CD300LF_-_72709678.23-P1P2	TGCAAGTGTACAAATCCAGCCCACCTTGTTGGCCAATCCTCCAAACCTGGTGTTTAAGAGCTAAGCTGTAGGAAAGGGATCACCGTTC
TM1	A1	Targeting	CD300LG_+_41924321.23-P1P2	TGCAAGTGTACAAATCCAGCCCACCTTGTTGGCTAAACTCGTGCCCCTTCAGTTTAAGAGCTAAGCTGTAGGAAAGGGATCACCGTTC
TM1	A1	Targeting	CD300LG_+_41924482.23-P1P2	TGCAAGTGTACAAATCCAGCCCACCTTGTTGGGTCGCGTGAAACCAGGCCAGTTTAAGAGCTAAGCTGTAGGAAAGGGATCACCGTTC
TM1	A1	Targeting	CD300LG_-_41924296.23-P1P2	TGCAAGTGTACAAATCCAGCCCACCTTGTTGGTCGACTTACAGACCCCTTAGTTTAAGAGCTAAGCTGTAGGAAAGGGATCACCGTTC
TM1	A1	Targeting	CD300LG_-_41924317.23-P1P2	TGCAAGTGTACAAATCCAGCCCACCTTGTTGGGCGCACGGACCACAGGTTAGTTTAAGAGCTAAGCTGTAGGAAAGGGATCACCGTTC
TM1	A1	Targeting	CD300LG_-_41924330.23-P1P2	TGCAAGTGTACAAATCCAGCCCACCTTGTTGGAGGTTAAGGCCCCCTTGAAGTTTAAGAGCTAAGCTGTAGGAAAGGGATCACCGTTC
TM1	A1	Targeting	CD300LG_-_41924360.23-P1P2	TGCAAGTGTACAAATCCAGCCCACCTTGTTGGTTAGGAGAAACTCTGGTGTGTTTAAGAGCTAAGCTGTAGGAAAGGGATCACCGTTC
TM1	A1	Targeting	CD300LG_-_41924387.23-P1P2	TGCAAGTGTACAAATCCAGCCCACCTTGTTGGAGTCCTGGAAGGTGAGCCCGTTTAAGAGCTAAGCTGTAGGAAAGGGATCACCGTTC
TM1	A1	Targeting	CD300LG_-_41924403.23-P1P2	TGCAAGTGTACAAATCCAGCCCACCTTGTTGGCCCTGGGGTAGGCACGCGTGTTTAAGAGCTAAGCTGTAGGAAAGGGATCACCGTTC
TM1	A1	Targeting	CD300LG_-_41924417.23-P1P2	TGCAAGTGTACAAATCCAGCCCACCTTGTTGGCGCGTGGGCGCTCAGAAAAGTTTAAGAGCTAAGCTGTAGGAAAGGGATCACCGTTC
TM1	A1	Targeting	CD300LG_-_41924453.23-P1P2	TGCAAGTGTACAAATCCAGCCCACCTTGTTGGTCCCCGGCTGGGCCTGCGGGTTTAAGAGCTAAGCTGTAGGAAAGGGATCACCGTTC
TM1	A1	Targeting	CD302_+_160654842.23-P1P2	TGCAAGTGTACAAATCCAGCCCACCTTGTTGGGACACCCGGGTTCTCCTGGGTTTAAGAGCTAAGCTGTAGGAAAGGGATCACCGTTC
TM1	A1	Targeting	CD302_+_160654845.23-P1P2	TGCAAGTGTACAAATCCAGCCCACCTTGTTGGCGGGACACCCGGGTTCTCCGTTTAAGAGCTAAGCTGTAGGAAAGGGATCACCGTTC
TM1	A1	Targeting	CD302_+_160654854.23-P1P2	TGCAAGTGTACAAATCCAGCCCACCTTGTTGGCCTGCGGGACGGGACACCCGTTTAAGAGCTAAGCTGTAGGAAAGGGATCACCGTTC
TM1	A1	Targeting	CD302_+_160654863.23-P1P2	TGCAAGTGTACAAATCCAGCCCACCTTGTTGGCCAGCCGCTCCTGCGGGACGTTTAAGAGCTAAGCTGTAGGAAAGGGATCACCGTTC
TM1	A1	Targeting	CD302_-_160654829.23-P1P2	TGCAAGTGTACAAATCCAGCCCACCTTGTTGGCCCCCGGGCGGAACGTGAAGTTTAAGAGCTAAGCTGTAGGAAAGGGATCACCGTTC
TM1	A1	Targeting	CD302_-_160654835.23-P1P2	TGCAAGTGTACAAATCCAGCCCACCTTGTTGGGGCGGAACGTGAACGGCACGTTTAAGAGCTAAGCTGTAGGAAAGGGATCACCGTTC
TM1	A1	Targeting	CD302_-_160654838.23-P1P2	TGCAAGTGTACAAATCCAGCCCACCTTGTTGGGGAACGTGAACGGCACTGGGTTTAAGAGCTAAGCTGTAGGAAAGGGATCACCGTTC
TM1	A1	Targeting	CD302_-_160654849.23-P1P2	TGCAAGTGTACAAATCCAGCCCACCTTGTTGGGGCACTGGGGGCTCCCACCGTTTAAGAGCTAAGCTGTAGGAAAGGGATCACCGTTC
TM1	A1	Targeting	CD302_-_160654858.23-P1P2	TGCAAGTGTACAAATCCAGCCCACCTTGTTGGGGCTCCCACCAGGAGAACCGTTTAAGAGCTAAGCTGTAGGAAAGGGATCACCGTTC
TM1	A1	Targeting	CD302_-_160654880.23-P1P2	TGCAAGTGTACAAATCCAGCCCACCTTGTTGGGTGTCCCGTCCCGCAGGAGGTTTAAGAGCTAAGCTGTAGGAAAGGGATCACCGTTC
TM1	A1	Targeting	CD320_+_8373212.23-P1P2	TGCAAGTGTACAAATCCAGCCCACCTTGTTGGGTGCGCAGGGATAAGAGAGGTTTAAGAGCTAAGCTGTAGGAAAGGGATCACCGTTC
TM1	A1	Targeting	CD320_+_8373265.23-P1P2	TGCAAGTGTACAAATCCAGCCCACCTTGTTGGCGGGCGCCGCAGAACTCAGGTTTAAGAGCTAAGCTGTAGGAAAGGGATCACCGTTC
TM1	A1	Targeting	CD320_+_8373515.23-P1P2	TGCAAGTGTACAAATCCAGCCCACCTTGTTGGGAAATGCGGAGTGCCTGAGGTTTAAGAGCTAAGCTGTAGGAAAGGGATCACCGTTC
TM1	A1	Targeting	CD320_+_8373536.23-P1P2	TGCAAGTGTACAAATCCAGCCCACCTTGTTGGAAAAGCAGTGGGATGAGGGGTTTAAGAGCTAAGCTGTAGGAAAGGGATCACCGTTC
TM1	A1	Targeting	CD320_+_8373546.23-P1P2	TGCAAGTGTACAAATCCAGCCCACCTTGTTGGTCGGCGCCACAAAAGCAGTGTTTAAGAGCTAAGCTGTAGGAAAGGGATCACCGTTC
TM1	A1	Targeting	CD320_-_8373252.23-P1P2	TGCAAGTGTACAAATCCAGCCCACCTTGTTGGCACGCGCACGCGCGGGGTTGTTTAAGAGCTAAGCTGTAGGAAAGGGATCACCGTTC
TM1	A1	Targeting	CD320_-_8373321.23-P1P2	TGCAAGTGTACAAATCCAGCCCACCTTGTTGGCGTAAATGTCAGAATAGCAGTTTAAGAGCTAAGCTGTAGGAAAGGGATCACCGTTC
TM1	A1	Targeting	CD320_-_8373337.23-P1P2	TGCAAGTGTACAAATCCAGCCCACCTTGTTGGGCAGGGAAAAGAGAATTAGGTTTAAGAGCTAAGCTGTAGGAAAGGGATCACCGTTC
TM1	A1	Targeting	CD320_-_8373411.23-P1P2	TGCAAGTGTACAAATCCAGCCCACCTTGTTGGTTGAAGTTAGAAACTTCTGGTTTAAGAGCTAAGCTGTAGGAAAGGGATCACCGTTC
TM1	A1	Targeting	CD320_-_8373638.23-P1P2	TGCAAGTGTACAAATCCAGCCCACCTTGTTGGTAGAATGCTAGCTACTGGAGTTTAAGAGCTAAGCTGTAGGAAAGGGATCACCGTTC
TM1	A1	Targeting	CD33_+_51727880.23-P1P2	TGCAAGTGTACAAATCCAGCCCACCTTGTTGGAGAAACAAAGAAGAGTCCTGTTTAAGAGCTAAGCTGTAGGAAAGGGATCACCGTTC
TM1	A1	Targeting	CD33_+_51728596.23-P1P2	TGCAAGTGTACAAATCCAGCCCACCTTGTTGGAACCAGTAACCATGAACTGGTTTAAGAGCTAAGCTGTAGGAAAGGGATCACCGTTC
TM1	A1	Targeting	CD33_+_51728878.23-P1P2	TGCAAGTGTACAAATCCAGCCCACCTTGTTGGTACCCATGAACTTCCCTTGGTTTAAGAGCTAAGCTGTAGGAAAGGGATCACCGTTC
TM1	A1	Targeting	CD33_+_51729021.23-P1P2	TGCAAGTGTACAAATCCAGCCCACCTTGTTGGAGGGGATGCAGAATCAGGAGTTTAAGAGCTAAGCTGTAGGAAAGGGATCACCGTTC
TM1	A1	Targeting	CD33_-_51728886.23-P1P2	TGCAAGTGTACAAATCCAGCCCACCTTGTTGGGCTTCAGAAGTGGCCGCAAGTTTAAGAGCTAAGCTGTAGGAAAGGGATCACCGTTC
TM1	A1	Targeting	CD33_-_51728897.23-P1P2	TGCAAGTGTACAAATCCAGCCCACCTTGTTGGGGCCGCAAGGGAAGTTCATGTTTAAGAGCTAAGCTGTAGGAAAGGGATCACCGTTC
TM1	A1	Targeting	CD33_-_51728907.23-P1P2	TGCAAGTGTACAAATCCAGCCCACCTTGTTGGGAAGTTCATGGGTACTGCAGTTTAAGAGCTAAGCTGTAGGAAAGGGATCACCGTTC
TM1	A1	Targeting	CD33_-_51728936.23-P1P2	TGCAAGTGTACAAATCCAGCCCACCTTGTTGGGGGATGGGACCCTGGTACTGTTTAAGAGCTAAGCTGTAGGAAAGGGATCACCGTTC
TM1	A1	Targeting	CD33_-_51728941.23-P1P2	TGCAAGTGTACAAATCCAGCCCACCTTGTTGGGGGACCCTGGTACTGGGAGGTTTAAGAGCTAAGCTGTAGGAAAGGGATCACCGTTC
TM1	A1	Targeting	CD33_-_51728988.23-P1P2	TGCAAGTGTACAAATCCAGCCCACCTTGTTGGAGCGGGGGAGCTTGACCAGGTTTAAGAGCTAAGCTGTAGGAAAGGGATCACCGTTC
TM1	A1	Targeting	CD3D_+_118213387.23-P1P2	TGCAAGTGTACAAATCCAGCCCACCTTGTTGGCTGTGAGTCAGCTAGGGGAGTTTAAGAGCTAAGCTGTAGGAAAGGGATCACCGTTC
TM1	A1	Targeting	CD3D_+_118213392.23-P1P2	TGCAAGTGTACAAATCCAGCCCACCTTGTTGGGGTACCTGTGAGTCAGCTAGTTTAAGAGCTAAGCTGTAGGAAAGGGATCACCGTTC
TM1	A1	Targeting	CD3D_+_118213583.23-P1P2	TGCAAGTGTACAAATCCAGCCCACCTTGTTGGAATAGGGACGCTAAAGTTCGTTTAAGAGCTAAGCTGTAGGAAAGGGATCACCGTTC
TM1	A1	Targeting	CD3D_+_118213598.23-P1P2	TGCAAGTGTACAAATCCAGCCCACCTTGTTGGTGTGGTTGCATTGTCAATAGTTTAAGAGCTAAGCTGTAGGAAAGGGATCACCGTTC
TM1	A1	Targeting	CD3D_+_118213642.23-P1P2	TGCAAGTGTACAAATCCAGCCCACCTTGTTGGCTCAAGGGGCTTCGAGATGGTTTAAGAGCTAAGCTGTAGGAAAGGGATCACCGTTC
TM1	A1	Targeting	CD3D_+_118213657.23-P1P2	TGCAAGTGTACAAATCCAGCCCACCTTGTTGGGGGCCGACGGCTTCTCTCAGTTTAAGAGCTAAGCTGTAGGAAAGGGATCACCGTTC
TM1	A1	Targeting	CD3D_+_118213733.23-P1P2	TGCAAGTGTACAAATCCAGCCCACCTTGTTGGTCCCTGGCTGCCTAGTGAAGTTTAAGAGCTAAGCTGTAGGAAAGGGATCACCGTTC
TM1	A1	Targeting	CD3D_-_118213422.23-P1P2	TGCAAGTGTACAAATCCAGCCCACCTTGTTGGACTCACAGGTACCGGAAAGGTTTAAGAGCTAAGCTGTAGGAAAGGGATCACCGTTC
TM1	A1	Targeting	CD3D_-_118213430.23-P1P2	TGCAAGTGTACAAATCCAGCCCACCTTGTTGGGTACCGGAAAGAGGAGAGTGTTTAAGAGCTAAGCTGTAGGAAAGGGATCACCGTTC
TM1	A1	Targeting	CD3D_-_118213582.23-P1P2	TGCAAGTGTACAAATCCAGCCCACCTTGTTGGGCAGAGAATATGGAAAAGGGTTTAAGAGCTAAGCTGTAGGAAAGGGATCACCGTTC
TM1	A1	Targeting	CD3E_+_118175134.23-P1P2	TGCAAGTGTACAAATCCAGCCCACCTTGTTGGTATAAGCTCTGACAGGAAGGTTTAAGAGCTAAGCTGTAGGAAAGGGATCACCGTTC
TM1	A1	Targeting	CD3E_+_118175140.23-P1P2	TGCAAGTGTACAAATCCAGCCCACCTTGTTGGTTCCTCTATAAGCTCTGACGTTTAAGAGCTAAGCTGTAGGAAAGGGATCACCGTTC
TM1	A1	Targeting	CD3E_+_118175285.23-P1P2	TGCAAGTGTACAAATCCAGCCCACCTTGTTGGGACTCTGACAATACCTGGAGTTTAAGAGCTAAGCTGTAGGAAAGGGATCACCGTTC
TM1	A1	Targeting	CD3E_+_118175306.23-P1P2	TGCAAGTGTACAAATCCAGCCCACCTTGTTGGTCCTAGAAGGCCAAACAAGGTTTAAGAGCTAAGCTGTAGGAAAGGGATCACCGTTC
TM1	A1	Targeting	CD3E_+_118175376.23-P1P2	TGCAAGTGTACAAATCCAGCCCACCTTGTTGGCCTCACTTGGAAACGTTCAGTTTAAGAGCTAAGCTGTAGGAAAGGGATCACCGTTC
TM1	A1	Targeting	CD3E_+_118175419.23-P1P2	TGCAAGTGTACAAATCCAGCCCACCTTGTTGGCCCCACACAGGAAGTAGAGGTTTAAGAGCTAAGCTGTAGGAAAGGGATCACCGTTC
TM1	A1	Targeting	CD3E_-_118175183.23-P1P2	TGCAAGTGTACAAATCCAGCCCACCTTGTTGGGGAAGACCCCGCAATGTGGGTTTAAGAGCTAAGCTGTAGGAAAGGGATCACCGTTC
TM1	A1	Targeting	CD3E_-_118175317.23-P1P2	TGCAAGTGTACAAATCCAGCCCACCTTGTTGGTTGTCAGAGTCCTCTTGTTGTTTAAGAGCTAAGCTGTAGGAAAGGGATCACCGTTC
TM1	A1	Targeting	CD3E_-_118175326.23-P1P2	TGCAAGTGTACAAATCCAGCCCACCTTGTTGGTCCTCTTGTTTGGCCTTCTGTTTAAGAGCTAAGCTGTAGGAAAGGGATCACCGTTC
TM1	A1	Targeting	CD3E_-_118175418.23-P1P2	TGCAAGTGTACAAATCCAGCCCACCTTGTTGGGTAAAACCCGCAGGCCCAGGTTTAAGAGCTAAGCTGTAGGAAAGGGATCACCGTTC
TM1	A1	Targeting	CD3G_+_118214686.23-P1P2	TGCAAGTGTACAAATCCAGCCCACCTTGTTGGAGGGACTCTCAGATGCTTGGTTTAAGAGCTAAGCTGTAGGAAAGGGATCACCGTTC
TM1	A1	Targeting	CD3G_+_118214765.23-P1P2	TGCAAGTGTACAAATCCAGCCCACCTTGTTGGGTCCCTGTCATTAGTTGTTGTTTAAGAGCTAAGCTGTAGGAAAGGGATCACCGTTC
TM1	A1	Targeting	CD3G_+_118214827.23-P1P2	TGCAAGTGTACAAATCCAGCCCACCTTGTTGGAACCGCAATGGATGCTGGGGTTTAAGAGCTAAGCTGTAGGAAAGGGATCACCGTTC
TM1	A1	Targeting	CD3G_+_118214831.23-P1P2	TGCAAGTGTACAAATCCAGCCCACCTTGTTGGAGGGAACCGCAATGGATGCGTTTAAGAGCTAAGCTGTAGGAAAGGGATCACCGTTC
TM1	A1	Targeting	CD3G_+_118214838.23-P1P2	TGCAAGTGTACAAATCCAGCCCACCTTGTTGGCTTGCACAGGGAACCGCAAGTTTAAGAGCTAAGCTGTAGGAAAGGGATCACCGTTC
TM1	A1	Targeting	CD3G_+_118215036.23-P1P2	TGCAAGTGTACAAATCCAGCCCACCTTGTTGGGGCTCCACCCATCACTGTTGTTTAAGAGCTAAGCTGTAGGAAAGGGATCACCGTTC
TM1	A1	Targeting	CD3G_-_118214876.23-P1P2	TGCAAGTGTACAAATCCAGCCCACCTTGTTGGGCAAGATGAGTCTCTGAGTGTTTAAGAGCTAAGCTGTAGGAAAGGGATCACCGTTC
TM1	A1	Targeting	CD3G_-_118215053.23-P1P2	TGCAAGTGTACAAATCCAGCCCACCTTGTTGGCAGCCCCAACAGTGATGGGGTTTAAGAGCTAAGCTGTAGGAAAGGGATCACCGTTC
TM1	A1	Targeting	CD3G_-_118215076.23-P1P2	TGCAAGTGTACAAATCCAGCCCACCTTGTTGGGCCAGTCTAGCTGCTGCACGTTTAAGAGCTAAGCTGTAGGAAAGGGATCACCGTTC
TM1	A1	Targeting	CD3G_-_118215101.23-P1P2	TGCAAGTGTACAAATCCAGCCCACCTTGTTGGGCTGGCTGGCTGGCTGCTAGTTTAAGAGCTAAGCTGTAGGAAAGGGATCACCGTTC
TM1	A1	Targeting	CD40LG_+_135729956.23-P1P2	TGCAAGTGTACAAATCCAGCCCACCTTGTTGGGAAGCGGGAACCTGGTATAGTTTAAGAGCTAAGCTGTAGGAAAGGGATCACCGTTC
TM1	A1	Targeting	CD40LG_+_135729963.23-P1P2	TGCAAGTGTACAAATCCAGCCCACCTTGTTGGCTAATACGAAGCGGGAACCGTTTAAGAGCTAAGCTGTAGGAAAGGGATCACCGTTC
TM1	A1	Targeting	CD40LG_+_135730177.23-P1P2	TGCAAGTGTACAAATCCAGCCCACCTTGTTGGACCCATATCATTCACTTCCGTTTAAGAGCTAAGCTGTAGGAAAGGGATCACCGTTC
TM1	A1	Targeting	CD40LG_+_135730229.23-P1P2	TGCAAGTGTACAAATCCAGCCCACCTTGTTGGCAGCAAAAACGTTACGTAAGTTTAAGAGCTAAGCTGTAGGAAAGGGATCACCGTTC
TM1	A1	Targeting	CD40LG_+_135730319.23-P1P2	TGCAAGTGTACAAATCCAGCCCACCTTGTTGGCAAAGTGGCCACCTTACTCGTTTAAGAGCTAAGCTGTAGGAAAGGGATCACCGTTC
TM1	A1	Targeting	CD40LG_+_135730333.23-P1P2	TGCAAGTGTACAAATCCAGCCCACCTTGTTGGCATGAGAAGACTGTCAAAGGTTTAAGAGCTAAGCTGTAGGAAAGGGATCACCGTTC
TM1	A1	Targeting	CD40LG_-_135730019.23-P1P2	TGCAAGTGTACAAATCCAGCCCACCTTGTTGGGAAATAAGTCTATTGCTGGGTTTAAGAGCTAAGCTGTAGGAAAGGGATCACCGTTC
TM1	A1	Targeting	CD40LG_-_135730075.23-P1P2	TGCAAGTGTACAAATCCAGCCCACCTTGTTGGCAAAAAGTTAGACAGTGATGTTTAAGAGCTAAGCTGTAGGAAAGGGATCACCGTTC
TM1	A1	Targeting	CD40LG_-_135730197.23-P1P2	TGCAAGTGTACAAATCCAGCCCACCTTGTTGGGCCTGGAAGTGAATGATATGTTTAAGAGCTAAGCTGTAGGAAAGGGATCACCGTTC
TM1	A1	Targeting	CD40LG_-_135730332.23-P1P2	TGCAAGTGTACAAATCCAGCCCACCTTGTTGGTAACTAATCCTGAGTAAGGGTTTAAGAGCTAAGCTGTAGGAAAGGGATCACCGTTC
TM1	A1	Targeting	CD40_+_44746682.23-P1P2	TGCAAGTGTACAAATCCAGCCCACCTTGTTGGTCCCACAAAGGCCAAGCCGGTTTAAGAGCTAAGCTGTAGGAAAGGGATCACCGTTC
TM1	A1	Targeting	CD40_+_44746846.23-P1P2	TGCAAGTGTACAAATCCAGCCCACCTTGTTGGCGCGGTCCACCTATCGGGGGTTTAAGAGCTAAGCTGTAGGAAAGGGATCACCGTTC
TM1	A1	Targeting	CD40_+_44746850.23-P1P2	TGCAAGTGTACAAATCCAGCCCACCTTGTTGGCAATCGCGGTCCACCTATCGTTTAAGAGCTAAGCTGTAGGAAAGGGATCACCGTTC
TM1	A1	Targeting	CD40_+_44746888.23-P1P2	TGCAAGTGTACAAATCCAGCCCACCTTGTTGGTTGGCCCCGCCCAGGAAAGGTTTAAGAGCTAAGCTGTAGGAAAGGGATCACCGTTC
TM1	A1	Targeting	CD40_-_44746620.23-P1P2	TGCAAGTGTACAAATCCAGCCCACCTTGTTGGAAAACCGTGAGGGTCCCTGGTTTAAGAGCTAAGCTGTAGGAAAGGGATCACCGTTC
TM1	A1	Targeting	CD40_-_44746711.23-P1P2	TGCAAGTGTACAAATCCAGCCCACCTTGTTGGTGGCCTTTGTGGGACCTGGGTTTAAGAGCTAAGCTGTAGGAAAGGGATCACCGTTC
TM1	A1	Targeting	CD40_-_44746783.23-P1P2	TGCAAGTGTACAAATCCAGCCCACCTTGTTGGGATGCGTCCCTAAACTCCCGTTTAAGAGCTAAGCTGTAGGAAAGGGATCACCGTTC
TM1	A1	Targeting	CD40_-_44746839.23-P1P2	TGCAAGTGTACAAATCCAGCCCACCTTGTTGGCCTGCGCGGTGAATTGCTGGTTTAAGAGCTAAGCTGTAGGAAAGGGATCACCGTTC
TM1	A1	Targeting	CD40_-_44746858.23-P1P2	TGCAAGTGTACAAATCCAGCCCACCTTGTTGGGGGGCTCCGCCCCCCCGATGTTTAAGAGCTAAGCTGTAGGAAAGGGATCACCGTTC
TM1	A1	Targeting	CD40_-_44746861.23-P1P2	TGCAAGTGTACAAATCCAGCCCACCTTGTTGGGCTCCGCCCCCCCGATAGGGTTTAAGAGCTAAGCTGTAGGAAAGGGATCACCGTTC
TM1	A1	Targeting	CD44_+_35160426.23-P1P2	TGCAAGTGTACAAATCCAGCCCACCTTGTTGGCCTGCGCCCAGAGACGCACGTTTAAGAGCTAAGCTGTAGGAAAGGGATCACCGTTC
TM1	A1	Targeting	CD44_+_35160500.23-P1P2	TGCAAGTGTACAAATCCAGCCCACCTTGTTGGTCGGGGCTGCCAGGGACGTGTTTAAGAGCTAAGCTGTAGGAAAGGGATCACCGTTC
TM1	A1	Targeting	CD44_+_35160507.23-P1P2	TGCAAGTGTACAAATCCAGCCCACCTTGTTGGTAAATAATCGGGGCTGCCAGTTTAAGAGCTAAGCTGTAGGAAAGGGATCACCGTTC
TM1	A1	Targeting	CD44_+_35160516.23-P1P2	TGCAAGTGTACAAATCCAGCCCACCTTGTTGGCTGAGGCTGTAAATAATCGGTTTAAGAGCTAAGCTGTAGGAAAGGGATCACCGTTC
TM1	A1	Targeting	CD44_+_35160565.23-P1P2	TGCAAGTGTACAAATCCAGCCCACCTTGTTGGAAGTAGCAGCCCTCCCGGGGTTTAAGAGCTAAGCTGTAGGAAAGGGATCACCGTTC
TM1	A1	Targeting	CD44_+_35160594.23-P1P2	TGCAAGTGTACAAATCCAGCCCACCTTGTTGGGTGACTAAGCAGCCCGCAGGTTTAAGAGCTAAGCTGTAGGAAAGGGATCACCGTTC
TM1	A1	Targeting	CD44_+_35160650.23-P1P2	TGCAAGTGTACAAATCCAGCCCACCTTGTTGGGTGACCTAAGACGGAGGGAGTTTAAGAGCTAAGCTGTAGGAAAGGGATCACCGTTC
TM1	A1	Targeting	CD44_-_35160548.23-P1P2	TGCAAGTGTACAAATCCAGCCCACCTTGTTGGTACAGCCTCAGCAGAGCACGTTTAAGAGCTAAGCTGTAGGAAAGGGATCACCGTTC
TM1	A1	Targeting	CD44_-_35160573.23-P1P2	TGCAAGTGTACAAATCCAGCCCACCTTGTTGGGGGGCAGAGGGGCCCGCCCGTTTAAGAGCTAAGCTGTAGGAAAGGGATCACCGTTC
TM1	A1	Targeting	CD44_-_35160632.23-P1P2	TGCAAGTGTACAAATCCAGCCCACCTTGTTGGGTCACAGCCCCCCTTGCTTGTTTAAGAGCTAAGCTGTAGGAAAGGGATCACCGTTC
TM1	A1	Targeting	CD46_+_207925178.23-P1P2	TGCAAGTGTACAAATCCAGCCCACCTTGTTGGGCGTCCTGCGGGAAAGGACGTTTAAGAGCTAAGCTGTAGGAAAGGGATCACCGTTC
TM1	A1	Targeting	CD46_+_207925183.23-P1P2	TGCAAGTGTACAAATCCAGCCCACCTTGTTGGCTGAGGCGTCCTGCGGGAAGTTTAAGAGCTAAGCTGTAGGAAAGGGATCACCGTTC
TM1	A1	Targeting	CD46_+_207925209.23-P1P2	TGCAAGTGTACAAATCCAGCCCACCTTGTTGGAGCCCTTGGCCTACCATCCGTTTAAGAGCTAAGCTGTAGGAAAGGGATCACCGTTC
TM1	A1	Targeting	CD46_+_207925287.23-P1P2	TGCAAGTGTACAAATCCAGCCCACCTTGTTGGTGGCCTTCGAGAGGTCAGGGTTTAAGAGCTAAGCTGTAGGAAAGGGATCACCGTTC
TM1	A1	Targeting	CD46_+_207925290.23-P1P2	TGCAAGTGTACAAATCCAGCCCACCTTGTTGGCCTTGGCCTTCGAGAGGTCGTTTAAGAGCTAAGCTGTAGGAAAGGGATCACCGTTC
TM1	A1	Targeting	CD46_+_207925295.23-P1P2	TGCAAGTGTACAAATCCAGCCCACCTTGTTGGGCAGCCCTTGGCCTTCGAGGTTTAAGAGCTAAGCTGTAGGAAAGGGATCACCGTTC
TM1	A1	Targeting	CD46_+_207925316.23-P1P2	TGCAAGTGTACAAATCCAGCCCACCTTGTTGGGCGGAGCCTCGGCGTTCATGTTTAAGAGCTAAGCTGTAGGAAAGGGATCACCGTTC
TM1	A1	Targeting	CD46_+_207925366.23-P1P2	TGCAAGTGTACAAATCCAGCCCACCTTGTTGGGAAGTGCGTCGAGTCACCAGTTTAAGAGCTAAGCTGTAGGAAAGGGATCACCGTTC
TM1	A1	Targeting	CD46_-_207925228.23-P1P2	TGCAAGTGTACAAATCCAGCCCACCTTGTTGGTTCCGGGATGGTAGGCCAAGTTTAAGAGCTAAGCTGTAGGAAAGGGATCACCGTTC
[truncated: 17,141 more rows]

## Sheet: KCGS_TM2
Library	Library ID	Type	Target ID	gRNA
TM2p	A2	Targeting	AASDH_+_57253649.23-P1P2	CTTAAGGTTTGCCCATTCCCCCACCTTGTTGGGACGCGGAAGATTTACGTAGTTTAAGAGCTAAGCTGACACCGTGGAAGCTATAACA
TM2p	A2	Targeting	AASDH_+_57253696.23-P1P2	CTTAAGGTTTGCCCATTCCCCCACCTTGTTGGAGCTCCACGCAGCCGGCCCGTTTAAGAGCTAAGCTGACACCGTGGAAGCTATAACA
TM2p	A2	Targeting	AASDH_+_57253702.23-P1P2	CTTAAGGTTTGCCCATTCCCCCACCTTGTTGGAGCGCCAGCTCCACGCAGCGTTTAAGAGCTAAGCTGACACCGTGGAAGCTATAACA
TM2p	A2	Targeting	AASDH_+_57253725.23-P1P2	CTTAAGGTTTGCCCATTCCCCCACCTTGTTGGAGCGCCTCGGCTTCAGGAGGTTTAAGAGCTAAGCTGACACCGTGGAAGCTATAACA
TM2p	A2	Targeting	AASDH_+_57253803.23-P1P2	CTTAAGGTTTGCCCATTCCCCCACCTTGTTGGGAGACCATGCGCGACCCCAGTTTAAGAGCTAAGCTGACACCGTGGAAGCTATAACA
TM2p	A2	Targeting	AASDH_+_57253866.23-P1P2	CTTAAGGTTTGCCCATTCCCCCACCTTGTTGGGGCAAGTACGAAAGGGTTAGTTTAAGAGCTAAGCTGACACCGTGGAAGCTATAACA
TM2p	A2	Targeting	AASDH_-_57253705.23-P1P2	CTTAAGGTTTGCCCATTCCCCCACCTTGTTGGAGTGCGAGCGACCCCGGGCGTTTAAGAGCTAAGCTGACACCGTGGAAGCTATAACA
TM2p	A2	Targeting	AASDH_-_57253762.23-P1P2	CTTAAGGTTTGCCCATTCCCCCACCTTGTTGGGGCGCTAACTTGAGTGAAGGTTTAAGAGCTAAGCTGACACCGTGGAAGCTATAACA
TM2p	A2	Targeting	AASDH_-_57253832.23-P1P2	CTTAAGGTTTGCCCATTCCCCCACCTTGTTGGTCGCGCATGGTCTCGGACAGTTTAAGAGCTAAGCTGACACCGTGGAAGCTATAACA
TM2p	A2	Targeting	AASDH_-_57253967.23-P1P2	CTTAAGGTTTGCCCATTCCCCCACCTTGTTGGAGAATAAAAACATCACCTAGTTTAAGAGCTAAGCTGACACCGTGGAAGCTATAACA
TM2p	A2	Targeting	ABCA13_+_48210559.23-P1P2	CTTAAGGTTTGCCCATTCCCCCACCTTGTTGGTCTGGGGGAGTTTGGGGAAGTTTAAGAGCTAAGCTGACACCGTGGAAGCTATAACA
TM2p	A2	Targeting	ABCA13_+_48210574.23-P1P2	CTTAAGGTTTGCCCATTCCCCCACCTTGTTGGGAAGCAGTGTTGGTGTCTGGTTTAAGAGCTAAGCTGACACCGTGGAAGCTATAACA
TM2p	A2	Targeting	ABCA13_+_48210861.23-P1P2	CTTAAGGTTTGCCCATTCCCCCACCTTGTTGGAGCTGTTCAGTGTTTCAGGGTTTAAGAGCTAAGCTGACACCGTGGAAGCTATAACA
TM2p	A2	Targeting	ABCA13_+_48210948.23-P1P2	CTTAAGGTTTGCCCATTCCCCCACCTTGTTGGGTGATGCAAGAGAGATTACGTTTAAGAGCTAAGCTGACACCGTGGAAGCTATAACA
TM2p	A2	Targeting	ABCA13_-_48210530.23-P1P2	CTTAAGGTTTGCCCATTCCCCCACCTTGTTGGAAGGAGAAGTATGAAGTGCGTTTAAGAGCTAAGCTGACACCGTGGAAGCTATAACA
TM2p	A2	Targeting	ABCA13_-_48210778.23-P1P2	CTTAAGGTTTGCCCATTCCCCCACCTTGTTGGGTCGCACAGATCAGTTCTGGTTTAAGAGCTAAGCTGACACCGTGGAAGCTATAACA
TM2p	A2	Targeting	ABCA13_-_48210792.23-P1P2	CTTAAGGTTTGCCCATTCCCCCACCTTGTTGGTTCTGTGGGTTCTCGGAAAGTTTAAGAGCTAAGCTGACACCGTGGAAGCTATAACA
TM2p	A2	Targeting	ABCA13_-_48210795.23-P1P2	CTTAAGGTTTGCCCATTCCCCCACCTTGTTGGTGTGGGTTCTCGGAAAGGGGTTTAAGAGCTAAGCTGACACCGTGGAAGCTATAACA
TM2p	A2	Targeting	ABCA13_-_48210841.23-P1P2	CTTAAGGTTTGCCCATTCCCCCACCTTGTTGGTGCCCGAGAAAGTCCCTGAGTTTAAGAGCTAAGCTGACACCGTGGAAGCTATAACA
TM2p	A2	Targeting	ABCA13_-_48210919.23-P1P2	CTTAAGGTTTGCCCATTCCCCCACCTTGTTGGCAGCAGATGCCGAACAAGAGTTTAAGAGCTAAGCTGACACCGTGGAAGCTATAACA
TM2p	A2	Targeting	ABCC11_+_48278275.23-P1	CTTAAGGTTTGCCCATTCCCCCACCTTGTTGGTGGCAGCCTTTCGCACTGGGTTTAAGAGCTAAGCTGACACCGTGGAAGCTATAACA
TM2p	A2	Targeting	ABCC11_+_48278294.23-P1	CTTAAGGTTTGCCCATTCCCCCACCTTGTTGGGGGCTCACTGATGACATGCGTTTAAGAGCTAAGCTGACACCGTGGAAGCTATAACA
TM2p	A2	Targeting	ABCC11_+_48278319.23-P1	CTTAAGGTTTGCCCATTCCCCCACCTTGTTGGCGGGAGGCGACTGGGGATCGTTTAAGAGCTAAGCTGACACCGTGGAAGCTATAACA
TM2p	A2	Targeting	ABCC11_+_48278325.23-P1	CTTAAGGTTTGCCCATTCCCCCACCTTGTTGGCAGCAGCGGGAGGCGACTGGTTTAAGAGCTAAGCTGACACCGTGGAAGCTATAACA
TM2p	A2	Targeting	ABCC11_+_48278351.23-P1	CTTAAGGTTTGCCCATTCCCCCACCTTGTTGGGGCAGCAGGACGCCCTCGTGTTTAAGAGCTAAGCTGACACCGTGGAAGCTATAACA
TM2p	A2	Targeting	ABCC11_+_48278372.23-P1	CTTAAGGTTTGCCCATTCCCCCACCTTGTTGGCTGGTGCGCATGGTGGAGCGTTTAAGAGCTAAGCTGACACCGTGGAAGCTATAACA
TM2p	A2	Targeting	ABCC11_+_48278479.23-P1	CTTAAGGTTTGCCCATTCCCCCACCTTGTTGGTGGCGGGGTCAGGCGTGTTGTTTAAGAGCTAAGCTGACACCGTGGAAGCTATAACA
TM2p	A2	Targeting	ABCC11_+_48281499.23-P2	CTTAAGGTTTGCCCATTCCCCCACCTTGTTGGCAGCCAAGTTCTATACTGCGTTTAAGAGCTAAGCTGACACCGTGGAAGCTATAACA
TM2p	A2	Targeting	ABCC11_+_48281540.23-P2	CTTAAGGTTTGCCCATTCCCCCACCTTGTTGGCTACTAAGCAGAAAAATGCGTTTAAGAGCTAAGCTGACACCGTGGAAGCTATAACA
TM2p	A2	Targeting	ABCC11_+_48281632.23-P2	CTTAAGGTTTGCCCATTCCCCCACCTTGTTGGGCTTGAAAGGATATTGTACGTTTAAGAGCTAAGCTGACACCGTGGAAGCTATAACA
TM2p	A2	Targeting	ABCC11_+_48281644.23-P2	CTTAAGGTTTGCCCATTCCCCCACCTTGTTGGCCATCTTGAAATGCTTGAAGTTTAAGAGCTAAGCTGACACCGTGGAAGCTATAACA
TM2p	A2	Targeting	ABCC11_+_48281670.23-P2	CTTAAGGTTTGCCCATTCCCCCACCTTGTTGGTGTAAATTTGGAAGAAAGCGTTTAAGAGCTAAGCTGACACCGTGGAAGCTATAACA
TM2p	A2	Targeting	ABCC11_+_48281681.23-P2	CTTAAGGTTTGCCCATTCCCCCACCTTGTTGGACCCTGAAAAGTGTAAATTGTTTAAGAGCTAAGCTGACACCGTGGAAGCTATAACA
TM2p	A2	Targeting	ABCC11_+_48281717.23-P2	CTTAAGGTTTGCCCATTCCCCCACCTTGTTGGCTGAGAAGTCGGCACTATGGTTTAAGAGCTAAGCTGACACCGTGGAAGCTATAACA
TM2p	A2	Targeting	ABCC11_-_48278224.23-P1	CTTAAGGTTTGCCCATTCCCCCACCTTGTTGGTGGAGGCGGGTCTGAGGTTGTTTAAGAGCTAAGCTGACACCGTGGAAGCTATAACA
TM2p	A2	Targeting	ABCC11_-_48278290.23-P1	CTTAAGGTTTGCCCATTCCCCCACCTTGTTGGTGACAGCCCCCAGTGCGAAGTTTAAGAGCTAAGCTGACACCGTGGAAGCTATAACA
TM2p	A2	Targeting	ABCC11_-_48278360.23-P1	CTTAAGGTTTGCCCATTCCCCCACCTTGTTGGCGCTGCTGCTCACCCACGAGTTTAAGAGCTAAGCTGACACCGTGGAAGCTATAACA
TM2p	A2	Targeting	ABCC11_-_48281536.23-P2	CTTAAGGTTTGCCCATTCCCCCACCTTGTTGGTGGCTGGCATGCTGACCCAGTTTAAGAGCTAAGCTGACACCGTGGAAGCTATAACA
TM2p	A2	Targeting	ABCC11_-_48281613.23-P2	CTTAAGGTTTGCCCATTCCCCCACCTTGTTGGCATTGTTTTCTTAGTGAAAGTTTAAGAGCTAAGCTGACACCGTGGAAGCTATAACA
TM2p	A2	Targeting	ABCC11_-_48281708.23-P2	CTTAAGGTTTGCCCATTCCCCCACCTTGTTGGTTACACTTTTCAGGGTACAGTTTAAGAGCTAAGCTGACACCGTGGAAGCTATAACA
TM2p	A2	Targeting	ABCG2_+_89080044.23-P1P2	CTTAAGGTTTGCCCATTCCCCCACCTTGTTGGCCACTGCGTTCAGCTCTGGGTTTAAGAGCTAAGCTGACACCGTGGAAGCTATAACA
TM2p	A2	Targeting	ABCG2_+_89080067.23-P1P2	CTTAAGGTTTGCCCATTCCCCCACCTTGTTGGAAACCCGGGGCGCTGGGGAGTTTAAGAGCTAAGCTGACACCGTGGAAGCTATAACA
TM2p	A2	Targeting	ABCG2_+_89080126.23-P1P2	CTTAAGGTTTGCCCATTCCCCCACCTTGTTGGTATCGCGGCCCGGCAGTCGGTTTAAGAGCTAAGCTGACACCGTGGAAGCTATAACA
TM2p	A2	Targeting	ABCG2_+_89080197.23-P1P2	CTTAAGGTTTGCCCATTCCCCCACCTTGTTGGGTGGTACCAGTCCTGCTGGGTTTAAGAGCTAAGCTGACACCGTGGAAGCTATAACA
TM2p	A2	Targeting	ABCG2_-_89079989.23-P1P2	CTTAAGGTTTGCCCATTCCCCCACCTTGTTGGGGGAGACCCGGACATCCAGGTTTAAGAGCTAAGCTGACACCGTGGAAGCTATAACA
TM2p	A2	Targeting	ABCG2_-_89080000.23-P1P2	CTTAAGGTTTGCCCATTCCCCCACCTTGTTGGACATCCAGGGGACGAGCTCGTTTAAGAGCTAAGCTGACACCGTGGAAGCTATAACA
TM2p	A2	Targeting	ABCG2_-_89080109.23-P1P2	CTTAAGGTTTGCCCATTCCCCCACCTTGTTGGTCCCCAGGTCGGGGTTCGCGTTTAAGAGCTAAGCTGACACCGTGGAAGCTATAACA
TM2p	A2	Targeting	ABCG2_-_89080139.23-P1P2	CTTAAGGTTTGCCCATTCCCCCACCTTGTTGGAGGCGTGGCCCCGACTGCCGTTTAAGAGCTAAGCTGACACCGTGGAAGCTATAACA
TM2p	A2	Targeting	ABCG2_-_89080233.23-P1P2	CTTAAGGTTTGCCCATTCCCCCACCTTGTTGGGTACCACCGCCCTCCCTCGGTTTAAGAGCTAAGCTGACACCGTGGAAGCTATAACA
TM2p	A2	Targeting	ABCG2_-_89080413.23-P1P2	CTTAAGGTTTGCCCATTCCCCCACCTTGTTGGGCCGGAGCGCCGAAGCACCGTTTAAGAGCTAAGCTGACACCGTGGAAGCTATAACA
TM2p	A2	Targeting	ABHD16A_+_31671120.23-P1P2	CTTAAGGTTTGCCCATTCCCCCACCTTGTTGGAGGGCACACAACACCTCAGGTTTAAGAGCTAAGCTGACACCGTGGAAGCTATAACA
TM2p	A2	Targeting	ABHD16A_+_31671138.23-P1P2	CTTAAGGTTTGCCCATTCCCCCACCTTGTTGGCGGTACGGGCTGACGTCAAGTTTAAGAGCTAAGCTGACACCGTGGAAGCTATAACA
TM2p	A2	Targeting	ABHD16A_+_31671151.23-P1P2	CTTAAGGTTTGCCCATTCCCCCACCTTGTTGGCCGGAGGCGGAGCCGGTACGTTTAAGAGCTAAGCTGACACCGTGGAAGCTATAACA
TM2p	A2	Targeting	ABHD16A_+_31671163.23-P1P2	CTTAAGGTTTGCCCATTCCCCCACCTTGTTGGGTCGCAACTCGCCCGGAGGGTTTAAGAGCTAAGCTGACACCGTGGAAGCTATAACA
TM2p	A2	Targeting	ABHD16A_+_31671198.23-P1P2	CTTAAGGTTTGCCCATTCCCCCACCTTGTTGGACTGCGCGAAACTCTTCTCGTTTAAGAGCTAAGCTGACACCGTGGAAGCTATAACA
TM2p	A2	Targeting	ABHD16A_-_31670881.23-P1P2	CTTAAGGTTTGCCCATTCCCCCACCTTGTTGGGGGAGCAAAAGGCCGTAAAGTTTAAGAGCTAAGCTGACACCGTGGAAGCTATAACA
TM2p	A2	Targeting	ABHD16A_-_31671242.23-P1P2	CTTAAGGTTTGCCCATTCCCCCACCTTGTTGGGGAGCTACGGGTACAGCAGGTTTAAGAGCTAAGCTGACACCGTGGAAGCTATAACA
TM2p	A2	Targeting	ABHD16A_-_31671274.23-P1P2	CTTAAGGTTTGCCCATTCCCCCACCTTGTTGGGTGGAAGACCACTAGAACGGTTTAAGAGCTAAGCTGACACCGTGGAAGCTATAACA
TM2p	A2	Targeting	ABHD16A_-_31671350.23-P1P2	CTTAAGGTTTGCCCATTCCCCCACCTTGTTGGGCAGACTCTAGAGCGACAGGTTTAAGAGCTAAGCTGACACCGTGGAAGCTATAACA
TM2p	A2	Targeting	ABHD16A_-_31671359.23-P1P2	CTTAAGGTTTGCCCATTCCCCCACCTTGTTGGAGAGCGACAGCGGAAACGAGTTTAAGAGCTAAGCTGACACCGTGGAAGCTATAACA
TM2p	A2	Targeting	ABHD1_+_27346561.23-P1P2	CTTAAGGTTTGCCCATTCCCCCACCTTGTTGGAACCCGAGTGACCTGCGAAGTTTAAGAGCTAAGCTGACACCGTGGAAGCTATAACA
TM2p	A2	Targeting	ABHD1_+_27346650.23-P1P2	CTTAAGGTTTGCCCATTCCCCCACCTTGTTGGACCGCCGGTGCCCCGGGATGTTTAAGAGCTAAGCTGACACCGTGGAAGCTATAACA
TM2p	A2	Targeting	ABHD1_-_27346119.23-P1P2	CTTAAGGTTTGCCCATTCCCCCACCTTGTTGGAAGACACGGACAGTAACATGTTTAAGAGCTAAGCTGACACCGTGGAAGCTATAACA
TM2p	A2	Targeting	ABHD1_-_27346456.23-P1P2	CTTAAGGTTTGCCCATTCCCCCACCTTGTTGGTCGCCGGGGAAGAGTTTAAGTTTAAGAGCTAAGCTGACACCGTGGAAGCTATAACA
TM2p	A2	Targeting	ABHD1_-_27346483.23-P1P2	CTTAAGGTTTGCCCATTCCCCCACCTTGTTGGGAGATGCCCCGCACCAAGAGTTTAAGAGCTAAGCTGACACCGTGGAAGCTATAACA
TM2p	A2	Targeting	ABHD1_-_27346510.23-P1P2	CTTAAGGTTTGCCCATTCCCCCACCTTGTTGGGGGGGAGGCCGCTTGTCTCGTTTAAGAGCTAAGCTGACACCGTGGAAGCTATAACA
TM2p	A2	Targeting	ABHD1_-_27346531.23-P1P2	CTTAAGGTTTGCCCATTCCCCCACCTTGTTGGGCTGCACAGCCAAGAACCGGTTTAAGAGCTAAGCTGACACCGTGGAAGCTATAACA
TM2p	A2	Targeting	ABHD1_-_27346534.23-P1P2	CTTAAGGTTTGCCCATTCCCCCACCTTGTTGGGCACAGCCAAGAACCGCGGGTTTAAGAGCTAAGCTGACACCGTGGAAGCTATAACA
TM2p	A2	Targeting	ABHD1_-_27346543.23-P1P2	CTTAAGGTTTGCCCATTCCCCCACCTTGTTGGAGAACCGCGGAGGGGAAGAGTTTAAGAGCTAAGCTGACACCGTGGAAGCTATAACA
TM2p	A2	Targeting	ABHD1_-_27346571.23-P1P2	CTTAAGGTTTGCCCATTCCCCCACCTTGTTGGAGGGCGGGAGGCCATTCGCGTTTAAGAGCTAAGCTGACACCGTGGAAGCTATAACA
TM2p	A2	Targeting	ABHD3_+_19284586.23-P1P2	CTTAAGGTTTGCCCATTCCCCCACCTTGTTGGGACCTGCGGATGTTGTCCCGTTTAAGAGCTAAGCTGACACCGTGGAAGCTATAACA
TM2p	A2	Targeting	ABHD3_+_19284717.23-P1P2	CTTAAGGTTTGCCCATTCCCCCACCTTGTTGGAGACACTGTGGTCGGGAGTGTTTAAGAGCTAAGCTGACACCGTGGAAGCTATAACA
TM2p	A2	Targeting	ABHD3_+_19284728.23-P1P2	CTTAAGGTTTGCCCATTCCCCCACCTTGTTGGCGCCAGGCAGGAGACACTGGTTTAAGAGCTAAGCTGACACCGTGGAAGCTATAACA
TM2p	A2	Targeting	ABHD3_+_19284800.23-P1P2	CTTAAGGTTTGCCCATTCCCCCACCTTGTTGGCGGGCGGCGTTGGAGTCTCGTTTAAGAGCTAAGCTGACACCGTGGAAGCTATAACA
TM2p	A2	Targeting	ABHD3_-_19284909.23-P1P2	CTTAAGGTTTGCCCATTCCCCCACCTTGTTGGCCAAGACCGGCCACCGGGAGTTTAAGAGCTAAGCTGACACCGTGGAAGCTATAACA
TM2p	A2	Targeting	ABHD3_-_19284913.23-P1P2	CTTAAGGTTTGCCCATTCCCCCACCTTGTTGGGACCGGCCACCGGGAGGGCGTTTAAGAGCTAAGCTGACACCGTGGAAGCTATAACA
TM2p	A2	Targeting	ABHD3_-_19284953.23-P1P2	CTTAAGGTTTGCCCATTCCCCCACCTTGTTGGCTAGGTCGCAGTGGGCGATGTTTAAGAGCTAAGCTGACACCGTGGAAGCTATAACA
TM2p	A2	Targeting	ABHD3_-_19284965.23-P1P2	CTTAAGGTTTGCCCATTCCCCCACCTTGTTGGGGGCGATGGGGATCCCCAAGTTTAAGAGCTAAGCTGACACCGTGGAAGCTATAACA
TM2p	A2	Targeting	ABHD3_-_19284969.23-P1P2	CTTAAGGTTTGCCCATTCCCCCACCTTGTTGGGATGGGGATCCCCAAGGGTGTTTAAGAGCTAAGCTGACACCGTGGAAGCTATAACA
TM2p	A2	Targeting	ABHD3_-_19284988.23-P1P2	CTTAAGGTTTGCCCATTCCCCCACCTTGTTGGGGGCCGAGAGCTGACGGATGTTTAAGAGCTAAGCTGACACCGTGGAAGCTATAACA
TM2p	A2	Targeting	ACER3_+_76571718.23-P1P2	CTTAAGGTTTGCCCATTCCCCCACCTTGTTGGTGATCCAGGAAGGAGCCGGGTTTAAGAGCTAAGCTGACACCGTGGAAGCTATAACA
TM2p	A2	Targeting	ACER3_+_76571727.23-P1P2	CTTAAGGTTTGCCCATTCCCCCACCTTGTTGGGCAGGGGCGTGATCCAGGAGTTTAAGAGCTAAGCTGACACCGTGGAAGCTATAACA
TM2p	A2	Targeting	ACER3_+_76571753.23-P1P2	CTTAAGGTTTGCCCATTCCCCCACCTTGTTGGCCCGCCCCTCTTCACCCTTGTTTAAGAGCTAAGCTGACACCGTGGAAGCTATAACA
TM2p	A2	Targeting	ACER3_+_76571786.23-P1P2	CTTAAGGTTTGCCCATTCCCCCACCTTGTTGGGGTGTAAGGCCCACTCGGAGTTTAAGAGCTAAGCTGACACCGTGGAAGCTATAACA
TM2p	A2	Targeting	ACER3_+_76571799.23-P1P2	CTTAAGGTTTGCCCATTCCCCCACCTTGTTGGCCAGGCCCGACCTGGTGTAGTTTAAGAGCTAAGCTGACACCGTGGAAGCTATAACA
TM2p	A2	Targeting	ACER3_-_76571473.23-P1P2	CTTAAGGTTTGCCCATTCCCCCACCTTGTTGGAATCACGGGGATTGGTTGGGTTTAAGAGCTAAGCTGACACCGTGGAAGCTATAACA
TM2p	A2	Targeting	ACER3_-_76571689.23-P1P2	CTTAAGGTTTGCCCATTCCCCCACCTTGTTGGACCCCCAACCTACGGCCATGTTTAAGAGCTAAGCTGACACCGTGGAAGCTATAACA
TM2p	A2	Targeting	ACER3_-_76571769.23-P1P2	CTTAAGGTTTGCCCATTCCCCCACCTTGTTGGCCCCGCCCAAGGGTGAAGAGTTTAAGAGCTAAGCTGACACCGTGGAAGCTATAACA
TM2p	A2	Targeting	ACER3_-_76571797.23-P1P2	CTTAAGGTTTGCCCATTCCCCCACCTTGTTGGCCAGCCGGCGCCCTCCGAGGTTTAAGAGCTAAGCTGACACCGTGGAAGCTATAACA
TM2p	A2	Targeting	ACER3_-_76571867.23-P1P2	CTTAAGGTTTGCCCATTCCCCCACCTTGTTGGGGTGGGCGGGGCCTCCGTCGTTTAAGAGCTAAGCTGACACCGTGGAAGCTATAACA
TM2p	A2	Targeting	ACKR2_+_42850384.23-P1P2	CTTAAGGTTTGCCCATTCCCCCACCTTGTTGGGGGTCTCACTCTATGGCCTGTTTAAGAGCTAAGCTGACACCGTGGAAGCTATAACA
TM2p	A2	Targeting	ACKR2_+_42850731.23-P1P2	CTTAAGGTTTGCCCATTCCCCCACCTTGTTGGTTTGATCAATAGGAGGCTGGTTTAAGAGCTAAGCTGACACCGTGGAAGCTATAACA
TM2p	A2	Targeting	ACKR2_+_42850737.23-P1P2	CTTAAGGTTTGCCCATTCCCCCACCTTGTTGGTAAAACTTTGATCAATAGGGTTTAAGAGCTAAGCTGACACCGTGGAAGCTATAACA
TM2p	A2	Targeting	ACKR2_+_42850740.23-P1P2	CTTAAGGTTTGCCCATTCCCCCACCTTGTTGGATGTAAAACTTTGATCAATGTTTAAGAGCTAAGCTGACACCGTGGAAGCTATAACA
TM2p	A2	Targeting	ACKR2_+_42850788.23-P1P2	CTTAAGGTTTGCCCATTCCCCCACCTTGTTGGACAGAGTCACCTGTATCTTGTTTAAGAGCTAAGCTGACACCGTGGAAGCTATAACA
TM2p	A2	Targeting	ACKR2_-_42850481.23-P1P2	CTTAAGGTTTGCCCATTCCCCCACCTTGTTGGAATGTACTGTATTTGATCAGTTTAAGAGCTAAGCTGACACCGTGGAAGCTATAACA
TM2p	A2	Targeting	ACKR2_-_42850769.23-P1P2	CTTAAGGTTTGCCCATTCCCCCACCTTGTTGGTCAAAGTTTTACATGATGCGTTTAAGAGCTAAGCTGACACCGTGGAAGCTATAACA
TM2p	A2	Targeting	ACKR2_-_42850826.23-P1P2	CTTAAGGTTTGCCCATTCCCCCACCTTGTTGGTCTGTCTCATTATATGCTTGTTTAAGAGCTAAGCTGACACCGTGGAAGCTATAACA
TM2p	A2	Targeting	ACKR2_-_42850840.23-P1P2	CTTAAGGTTTGCCCATTCCCCCACCTTGTTGGTGCTTAGGTTTGATGAAACGTTTAAGAGCTAAGCTGACACCGTGGAAGCTATAACA
TM2p	A2	Targeting	ACKR2_-_42850889.23-P1P2	CTTAAGGTTTGCCCATTCCCCCACCTTGTTGGAACAAAGGATATGAGCTAAGTTTAAGAGCTAAGCTGACACCGTGGAAGCTATAACA
TM2p	A2	Targeting	ACKR3_+_237476203.23-P2	CTTAAGGTTTGCCCATTCCCCCACCTTGTTGGTCCCAGAAAACAGGCCTGGGTTTAAGAGCTAAGCTGACACCGTGGAAGCTATAACA
TM2p	A2	Targeting	ACKR3_+_237476211.23-P2	CTTAAGGTTTGCCCATTCCCCCACCTTGTTGGCCACCCTGTCCCAGAAAACGTTTAAGAGCTAAGCTGACACCGTGGAAGCTATAACA
TM2p	A2	Targeting	ACKR3_+_237476250.23-P2	CTTAAGGTTTGCCCATTCCCCCACCTTGTTGGGGTGCTTGGGGCCTGAACTGTTTAAGAGCTAAGCTGACACCGTGGAAGCTATAACA
TM2p	A2	Targeting	ACKR3_+_237476319.23-P2	CTTAAGGTTTGCCCATTCCCCCACCTTGTTGGCGCCAGCGGGGAATGGGGCGTTTAAGAGCTAAGCTGACACCGTGGAAGCTATAACA
TM2p	A2	Targeting	ACKR3_+_237476323.23-P2	CTTAAGGTTTGCCCATTCCCCCACCTTGTTGGCAAGCGCCAGCGGGGAATGGTTTAAGAGCTAAGCTGACACCGTGGAAGCTATAACA
TM2p	A2	Targeting	ACKR3_+_237478210.23-P1	CTTAAGGTTTGCCCATTCCCCCACCTTGTTGGAAAGTCCAAACCCCACGGGGTTTAAGAGCTAAGCTGACACCGTGGAAGCTATAACA
TM2p	A2	Targeting	ACKR3_+_237478213.23-P1	CTTAAGGTTTGCCCATTCCCCCACCTTGTTGGCACAAAGTCCAAACCCCACGTTTAAGAGCTAAGCTGACACCGTGGAAGCTATAACA
TM2p	A2	Targeting	ACKR3_+_237478274.23-P1	CTTAAGGTTTGCCCATTCCCCCACCTTGTTGGCCTGCACAAGTGTACTCTTGTTTAAGAGCTAAGCTGACACCGTGGAAGCTATAACA
TM2p	A2	Targeting	ACKR3_+_237478402.23-P1	CTTAAGGTTTGCCCATTCCCCCACCTTGTTGGGGAGCCTCTAGCCTCTAGAGTTTAAGAGCTAAGCTGACACCGTGGAAGCTATAACA
TM2p	A2	Targeting	ACKR3_-_237476056.23-P2	CTTAAGGTTTGCCCATTCCCCCACCTTGTTGGACCCAGCCGGGACCCCTAGGTTTAAGAGCTAAGCTGACACCGTGGAAGCTATAACA
TM2p	A2	Targeting	ACKR3_-_237476063.23-P2	CTTAAGGTTTGCCCATTCCCCCACCTTGTTGGCGGGACCCCTAGAGGATGGGTTTAAGAGCTAAGCTGACACCGTGGAAGCTATAACA
TM2p	A2	Targeting	ACKR3_-_237476398.23-P2	CTTAAGGTTTGCCCATTCCCCCACCTTGTTGGGCCCCGCCCGGCGGAACTAGTTTAAGAGCTAAGCTGACACCGTGGAAGCTATAACA
TM2p	A2	Targeting	ACKR3_-_237476409.23-P2	CTTAAGGTTTGCCCATTCCCCCACCTTGTTGGCGGAACTAGGGGACGGGTGGTTTAAGAGCTAAGCTGACACCGTGGAAGCTATAACA
TM2p	A2	Targeting	ACKR3_-_237476421.23-P2	CTTAAGGTTTGCCCATTCCCCCACCTTGTTGGACGGGTGGGGGACGTCGAAGTTTAAGAGCTAAGCTGACACCGTGGAAGCTATAACA
TM2p	A2	Targeting	ACKR3_-_237478118.23-P1	CTTAAGGTTTGCCCATTCCCCCACCTTGTTGGAGGAGCTCTTGGTGTTAATGTTTAAGAGCTAAGCTGACACCGTGGAAGCTATAACA
TM2p	A2	Targeting	ACKR3_-_237478270.23-P1	CTTAAGGTTTGCCCATTCCCCCACCTTGTTGGTGCAAATGAAAGAAGGCTGGTTTAAGAGCTAAGCTGACACCGTGGAAGCTATAACA
TM2p	A2	Targeting	ACKR3_-_237478314.23-P1	CTTAAGGTTTGCCCATTCCCCCACCTTGTTGGAGGAAACAACAGACTAGTGGTTTAAGAGCTAAGCTGACACCGTGGAAGCTATAACA
TM2p	A2	Targeting	ACKR3_-_237478326.23-P1	CTTAAGGTTTGCCCATTCCCCCACCTTGTTGGACTAGTGAGGTTTACAAGAGTTTAAGAGCTAAGCTGACACCGTGGAAGCTATAACA
TM2p	A2	Targeting	ACKR3_-_237478329.23-P1	CTTAAGGTTTGCCCATTCCCCCACCTTGTTGGAGTGAGGTTTACAAGAGGGGTTTAAGAGCTAAGCTGACACCGTGGAAGCTATAACA
TM2p	A2	Targeting	ACKR3_-_237478364.23-P1	CTTAAGGTTTGCCCATTCCCCCACCTTGTTGGGTGTCTGCCTGTGGGATGGGTTTAAGAGCTAAGCTGACACCGTGGAAGCTATAACA
TM2p	A2	Targeting	ACKR4_+_132315805.23-P1P2	CTTAAGGTTTGCCCATTCCCCCACCTTGTTGGGCATCTAGGCAGCACTTGTGTTTAAGAGCTAAGCTGACACCGTGGAAGCTATAACA
TM2p	A2	Targeting	ACKR4_+_132315826.23-P1P2	CTTAAGGTTTGCCCATTCCCCCACCTTGTTGGAGAAGGAGAATCCACCTGAGTTTAAGAGCTAAGCTGACACCGTGGAAGCTATAACA
TM2p	A2	Targeting	ACKR4_+_132315890.23-P1P2	CTTAAGGTTTGCCCATTCCCCCACCTTGTTGGATAGTTTCCACTTAGTCAAGTTTAAGAGCTAAGCTGACACCGTGGAAGCTATAACA
TM2p	A2	Targeting	ACKR4_+_132315966.23-P1P2	CTTAAGGTTTGCCCATTCCCCCACCTTGTTGGTTAAATTCAACTTCTTAAGGTTTAAGAGCTAAGCTGACACCGTGGAAGCTATAACA
TM2p	A2	Targeting	ACKR4_-_132315586.23-P1P2	CTTAAGGTTTGCCCATTCCCCCACCTTGTTGGGGGAAAATACTCTGGGACAGTTTAAGAGCTAAGCTGACACCGTGGAAGCTATAACA
TM2p	A2	Targeting	ACKR4_-_132315833.23-P1P2	CTTAAGGTTTGCCCATTCCCCCACCTTGTTGGGTGCTGCCTAGATGCCCTCGTTTAAGAGCTAAGCTGACACCGTGGAAGCTATAACA
TM2p	A2	Targeting	ACKR4_-_132315917.23-P1P2	CTTAAGGTTTGCCCATTCCCCCACCTTGTTGGACTAAGTGGAAACTATGAAGTTTAAGAGCTAAGCTGACACCGTGGAAGCTATAACA
TM2p	A2	Targeting	ACKR4_-_132316046.23-P1P2	CTTAAGGTTTGCCCATTCCCCCACCTTGTTGGGCTCACAAGGTTAAATTTCGTTTAAGAGCTAAGCTGACACCGTGGAAGCTATAACA
TM2p	A2	Targeting	ACKR4_-_132316078.23-P1P2	CTTAAGGTTTGCCCATTCCCCCACCTTGTTGGTGGATACAAGATAAAGGCGGTTTAAGAGCTAAGCTGACACCGTGGAAGCTATAACA
TM2p	A2	Targeting	ACKR4_-_132316111.23-P1P2	CTTAAGGTTTGCCCATTCCCCCACCTTGTTGGAACAAAAGTAGCTGGAGTTGTTTAAGAGCTAAGCTGACACCGTGGAAGCTATAACA
TM2p	A2	Targeting	ADIPOR1_+_202927458.23-P1P2	CTTAAGGTTTGCCCATTCCCCCACCTTGTTGGAGCCCGCGAGGAGGTGACGGTTTAAGAGCTAAGCTGACACCGTGGAAGCTATAACA
TM2p	A2	Targeting	ADIPOR1_+_202927498.23-P1P2	CTTAAGGTTTGCCCATTCCCCCACCTTGTTGGGGACTCCGCGAGAGGGCCTGTTTAAGAGCTAAGCTGACACCGTGGAAGCTATAACA
TM2p	A2	Targeting	ADIPOR1_+_202927568.23-P1P2	CTTAAGGTTTGCCCATTCCCCCACCTTGTTGGCAGGGAAGGCGGGGCAGCAGTTTAAGAGCTAAGCTGACACCGTGGAAGCTATAACA
TM2p	A2	Targeting	ADIPOR1_+_202927597.23-P1P2	CTTAAGGTTTGCCCATTCCCCCACCTTGTTGGCTGGCTGCGGCGGGGAGGTGTTTAAGAGCTAAGCTGACACCGTGGAAGCTATAACA
TM2p	A2	Targeting	ADIPOR1_+_202927668.23-P1P2	CTTAAGGTTTGCCCATTCCCCCACCTTGTTGGTCAGGCTGCGATAACGAGGGTTTAAGAGCTAAGCTGACACCGTGGAAGCTATAACA
TM2p	A2	Targeting	ADIPOR1_+_202927764.23-P1P2	CTTAAGGTTTGCCCATTCCCCCACCTTGTTGGGGACAGAGGAGATGAGATAGTTTAAGAGCTAAGCTGACACCGTGGAAGCTATAACA
TM2p	A2	Targeting	ADIPOR1_-_202927529.23-P1P2	CTTAAGGTTTGCCCATTCCCCCACCTTGTTGGCTCGCGGAGTCCCAATCACGTTTAAGAGCTAAGCTGACACCGTGGAAGCTATAACA
TM2p	A2	Targeting	ADIPOR1_-_202927638.23-P1P2	CTTAAGGTTTGCCCATTCCCCCACCTTGTTGGAGGTAACCTCCACCCGCCCGTTTAAGAGCTAAGCTGACACCGTGGAAGCTATAACA
TM2p	A2	Targeting	ADIPOR1_-_202927646.23-P1P2	CTTAAGGTTTGCCCATTCCCCCACCTTGTTGGTCCACCCGCCCCGGGGTAGGTTTAAGAGCTAAGCTGACACCGTGGAAGCTATAACA
TM2p	A2	Targeting	ADIPOR1_-_202927657.23-P1P2	CTTAAGGTTTGCCCATTCCCCCACCTTGTTGGCGGGGTAGAGGACGTTCGTGTTTAAGAGCTAAGCTGACACCGTGGAAGCTATAACA
TM2p	A2	Targeting	ADIPOR2_+_1799991.23-P1P2	CTTAAGGTTTGCCCATTCCCCCACCTTGTTGGTATACTGGGTGTTGAGGGCGTTTAAGAGCTAAGCTGACACCGTGGAAGCTATAACA
TM2p	A2	Targeting	ADIPOR2_+_1799996.23-P1P2	CTTAAGGTTTGCCCATTCCCCCACCTTGTTGGAAAACTATACTGGGTGTTGGTTTAAGAGCTAAGCTGACACCGTGGAAGCTATAACA
TM2p	A2	Targeting	ADIPOR2_+_1800032.23-P1P2	CTTAAGGTTTGCCCATTCCCCCACCTTGTTGGCATCGTGGGAGCTGTGGTTGTTTAAGAGCTAAGCTGACACCGTGGAAGCTATAACA
TM2p	A2	Targeting	ADIPOR2_+_1800045.23-P1P2	CTTAAGGTTTGCCCATTCCCCCACCTTGTTGGTAAAACCTGGGTGCATCGTGTTTAAGAGCTAAGCTGACACCGTGGAAGCTATAACA
TM2p	A2	Targeting	ADIPOR2_+_1800056.23-P1P2	CTTAAGGTTTGCCCATTCCCCCACCTTGTTGGTCTGACCGCTCTAAAACCTGTTTAAGAGCTAAGCTGACACCGTGGAAGCTATAACA
TM2p	A2	Targeting	ADIPOR2_+_1800088.23-P1P2	CTTAAGGTTTGCCCATTCCCCCACCTTGTTGGCAGCCGCGCTGTCCTAAACGTTTAAGAGCTAAGCTGACACCGTGGAAGCTATAACA
TM2p	A2	Targeting	ADIPOR2_+_1800139.23-P1P2	CTTAAGGTTTGCCCATTCCCCCACCTTGTTGGTGACGCGCATCGCACGAGGGTTTAAGAGCTAAGCTGACACCGTGGAAGCTATAACA
TM2p	A2	Targeting	ADIPOR2_-_1800084.23-P1P2	CTTAAGGTTTGCCCATTCCCCCACCTTGTTGGTTTAGAGCGGTCAGAGGGGGTTTAAGAGCTAAGCTGACACCGTGGAAGCTATAACA
TM2p	A2	Targeting	ADIPOR2_-_1800091.23-P1P2	CTTAAGGTTTGCCCATTCCCCCACCTTGTTGGCGGTCAGAGGGGCGGCTTCGTTTAAGAGCTAAGCTGACACCGTGGAAGCTATAACA
TM2p	A2	Targeting	ADIPOR2_-_1800132.23-P1P2	CTTAAGGTTTGCCCATTCCCCCACCTTGTTGGGCACGGCGTGTGGTCTTATGTTTAAGAGCTAAGCTGACACCGTGGAAGCTATAACA
TM2p	A2	Targeting	ADORA1_+_203097299.23-P1P2	CTTAAGGTTTGCCCATTCCCCCACCTTGTTGGGGGTGGCAGACGTGGGTCTGTTTAAGAGCTAAGCTGACACCGTGGAAGCTATAACA
TM2p	A2	Targeting	ADORA1_+_203097305.23-P1P2	CTTAAGGTTTGCCCATTCCCCCACCTTGTTGGGGACTGGGGTGGCAGACGTGTTTAAGAGCTAAGCTGACACCGTGGAAGCTATAACA
TM2p	A2	Targeting	ADORA1_-_203096437.23-P1P2	CTTAAGGTTTGCCCATTCCCCCACCTTGTTGGAGAGCCTGCAAAACAATATGTTTAAGAGCTAAGCTGACACCGTGGAAGCTATAACA
TM2p	A2	Targeting	ADORA1_-_203096605.23-P1P2	CTTAAGGTTTGCCCATTCCCCCACCTTGTTGGGTCGCTGGAGGCCAGACCAGTTTAAGAGCTAAGCTGACACCGTGGAAGCTATAACA
TM2p	A2	Targeting	ADORA1_-_203097097.23-P1P2	CTTAAGGTTTGCCCATTCCCCCACCTTGTTGGACCCCTGGGGCTCCCCAATGTTTAAGAGCTAAGCTGACACCGTGGAAGCTATAACA
TM2p	A2	Targeting	ADORA1_-_203097190.23-P1P2	CTTAAGGTTTGCCCATTCCCCCACCTTGTTGGAGAGCTGGAACGGGACCAGGTTTAAGAGCTAAGCTGACACCGTGGAAGCTATAACA
TM2p	A2	Targeting	ADORA1_-_203097227.23-P1P2	CTTAAGGTTTGCCCATTCCCCCACCTTGTTGGGCACCAGACGGGTCTCAAGGTTTAAGAGCTAAGCTGACACCGTGGAAGCTATAACA
TM2p	A2	Targeting	ADORA1_-_203097232.23-P1P2	CTTAAGGTTTGCCCATTCCCCCACCTTGTTGGAGACGGGTCTCAAGTGGGTGTTTAAGAGCTAAGCTGACACCGTGGAAGCTATAACA
TM2p	A2	Targeting	ADORA1_-_203097265.23-P1P2	CTTAAGGTTTGCCCATTCCCCCACCTTGTTGGTGCGGGCACGCTGGGGAATGTTTAAGAGCTAAGCTGACACCGTGGAAGCTATAACA
TM2p	A2	Targeting	ADORA1_-_203097341.23-P1P2	CTTAAGGTTTGCCCATTCCCCCACCTTGTTGGCCAGTCCCAGGTGCGAAACGTTTAAGAGCTAAGCTGACACCGTGGAAGCTATAACA
TM2p	A2	Targeting	ADORA2A_+_24819635.23-P1P2	CTTAAGGTTTGCCCATTCCCCCACCTTGTTGGCCCCCAGCGCGCTCCTCCCGTTTAAGAGCTAAGCTGACACCGTGGAAGCTATAACA
TM2p	A2	Targeting	ADORA2A_+_24819730.23-P1P2	CTTAAGGTTTGCCCATTCCCCCACCTTGTTGGGCCCGCAGGCGATCCTGGAGTTTAAGAGCTAAGCTGACACCGTGGAAGCTATAACA
TM2p	A2	Targeting	ADORA2A_+_24819760.23-P1P2	CTTAAGGTTTGCCCATTCCCCCACCTTGTTGGGGAGGGGGACCCGAGGCATGTTTAAGAGCTAAGCTGACACCGTGGAAGCTATAACA
TM2p	A2	Targeting	ADORA2A_+_24819774.23-P1P2	CTTAAGGTTTGCCCATTCCCCCACCTTGTTGGGAGAAACCGAGGCCGGAGGGTTTAAGAGCTAAGCTGACACCGTGGAAGCTATAACA
TM2p	A2	Targeting	ADORA2A_+_24819780.23-P1P2	CTTAAGGTTTGCCCATTCCCCCACCTTGTTGGTGCGCGGAGAAACCGAGGCGTTTAAGAGCTAAGCTGACACCGTGGAAGCTATAACA
TM2p	A2	Targeting	ADORA2A_+_24819784.23-P1P2	CTTAAGGTTTGCCCATTCCCCCACCTTGTTGGCCGCTGCGCGGAGAAACCGGTTTAAGAGCTAAGCTGACACCGTGGAAGCTATAACA
TM2p	A2	Targeting	ADORA2A_-_24819553.23-P1P2	CTTAAGGTTTGCCCATTCCCCCACCTTGTTGGGGGCCCGGAGCGCTCCAAGGTTTAAGAGCTAAGCTGACACCGTGGAAGCTATAACA
TM2p	A2	Targeting	ADORA2A_-_24819593.23-P1P2	CTTAAGGTTTGCCCATTCCCCCACCTTGTTGGGGCCCGAGGACTCCTGGAAGTTTAAGAGCTAAGCTGACACCGTGGAAGCTATAACA
TM2p	A2	Targeting	ADORA2A_-_24819622.23-P1P2	CTTAAGGTTTGCCCATTCCCCCACCTTGTTGGTGTGGCGCTGAGGAAGCGGGTTTAAGAGCTAAGCTGACACCGTGGAAGCTATAACA
TM2p	A2	Targeting	ADORA2A_-_24819713.23-P1P2	CTTAAGGTTTGCCCATTCCCCCACCTTGTTGGTCGCGGCCTCGTCCTGACAGTTTAAGAGCTAAGCTGACACCGTGGAAGCTATAACA
TM2p	A2	Targeting	ADORA2B_+_15848251.23-P1P2	CTTAAGGTTTGCCCATTCCCCCACCTTGTTGGCCGTGCCGCGTCTTGGTGGGTTTAAGAGCTAAGCTGACACCGTGGAAGCTATAACA
TM2p	A2	Targeting	ADORA2B_+_15848338.23-P1P2	CTTAAGGTTTGCCCATTCCCCCACCTTGTTGGCGCCCGCCCGTCTCGGGCTGTTTAAGAGCTAAGCTGACACCGTGGAAGCTATAACA
TM2p	A2	Targeting	ADORA2B_+_15848366.23-P1P2	CTTAAGGTTTGCCCATTCCCCCACCTTGTTGGGCCAAGAGGCGGCACCCATGTTTAAGAGCTAAGCTGACACCGTGGAAGCTATAACA
TM2p	A2	Targeting	ADORA2B_+_15848399.23-P1P2	CTTAAGGTTTGCCCATTCCCCCACCTTGTTGGGTGGCCGGGACCCACGGGTGTTTAAGAGCTAAGCTGACACCGTGGAAGCTATAACA
TM2p	A2	Targeting	ADORA2B_+_15848485.23-P1P2	CTTAAGGTTTGCCCATTCCCCCACCTTGTTGGCAGCCGCGTGAGACCCGCCGTTTAAGAGCTAAGCTGACACCGTGGAAGCTATAACA
TM2p	A2	Targeting	ADORA2B_-_15848318.23-P1P2	CTTAAGGTTTGCCCATTCCCCCACCTTGTTGGCGGGCGCGAACTTTGGGCTGTTTAAGAGCTAAGCTGACACCGTGGAAGCTATAACA
TM2p	A2	Targeting	ADORA2B_-_15848392.23-P1P2	CTTAAGGTTTGCCCATTCCCCCACCTTGTTGGGGGTGCCGCCTCTTGGCCGGTTTAAGAGCTAAGCTGACACCGTGGAAGCTATAACA
TM2p	A2	Targeting	ADORA2B_-_15848416.23-P1P2	CTTAAGGTTTGCCCATTCCCCCACCTTGTTGGGGCCCCGACCCGTGGGTCCGTTTAAGAGCTAAGCTGACACCGTGGAAGCTATAACA
TM2p	A2	Targeting	ADORA2B_-_15848503.23-P1P2	CTTAAGGTTTGCCCATTCCCCCACCTTGTTGGATGCCCGGCGGGTCTCACGGTTTAAGAGCTAAGCTGACACCGTGGAAGCTATAACA
TM2p	A2	Targeting	ADORA2B_-_15848534.23-P1P2	CTTAAGGTTTGCCCATTCCCCCACCTTGTTGGGCCCGGCGCGCCTTCGGTAGTTTAAGAGCTAAGCTGACACCGTGGAAGCTATAACA
TM2p	A2	Targeting	ADORA3_+_112031534.23-P1	CTTAAGGTTTGCCCATTCCCCCACCTTGTTGGACCCCAAATACTGGTGCCGGTTTAAGAGCTAAGCTGACACCGTGGAAGCTATAACA
TM2p	A2	Targeting	ADORA3_+_112031595.23-P1	CTTAAGGTTTGCCCATTCCCCCACCTTGTTGGAGAAGCTTTGTGCTGGACAGTTTAAGAGCTAAGCTGACACCGTGGAAGCTATAACA
TM2p	A2	Targeting	ADORA3_+_112031631.23-P1	CTTAAGGTTTGCCCATTCCCCCACCTTGTTGGTTCACAGATGCCATGGTCAGTTTAAGAGCTAAGCTGACACCGTGGAAGCTATAACA
TM2p	A2	Targeting	ADORA3_+_112031637.23-P1	CTTAAGGTTTGCCCATTCCCCCACCTTGTTGGTGTGTTTTCACAGATGCCAGTTTAAGAGCTAAGCTGACACCGTGGAAGCTATAACA
TM2p	A2	Targeting	ADORA3_+_112046337.23-P2	CTTAAGGTTTGCCCATTCCCCCACCTTGTTGGAGAGGGTTGCTTATCTTGAGTTTAAGAGCTAAGCTGACACCGTGGAAGCTATAACA
TM2p	A2	Targeting	ADORA3_+_112046353.23-P2	CTTAAGGTTTGCCCATTCCCCCACCTTGTTGGCCTGAAACACCCCTGAAGAGTTTAAGAGCTAAGCTGACACCGTGGAAGCTATAACA
TM2p	A2	Targeting	ADORA3_+_112046649.23-P2	CTTAAGGTTTGCCCATTCCCCCACCTTGTTGGAGTTCTGGCTAAGGTTAGGGTTTAAGAGCTAAGCTGACACCGTGGAAGCTATAACA
TM2p	A2	Targeting	ADORA3_+_112046652.23-P2	CTTAAGGTTTGCCCATTCCCCCACCTTGTTGGAATAGTTCTGGCTAAGGTTGTTTAAGAGCTAAGCTGACACCGTGGAAGCTATAACA
TM2p	A2	Targeting	ADORA3_+_112046663.23-P2	CTTAAGGTTTGCCCATTCCCCCACCTTGTTGGAACTTAGCAGGAATAGTTCGTTTAAGAGCTAAGCTGACACCGTGGAAGCTATAACA
TM2p	A2	Targeting	ADORA3_+_112046716.23-P2	CTTAAGGTTTGCCCATTCCCCCACCTTGTTGGTGCTGCAAAGGCTGGGTATGTTTAAGAGCTAAGCTGACACCGTGGAAGCTATAACA
TM2p	A2	Targeting	ADORA3_-_112031497.23-P1	CTTAAGGTTTGCCCATTCCCCCACCTTGTTGGCACATGATTGGTGCTGTTAGTTTAAGAGCTAAGCTGACACCGTGGAAGCTATAACA
TM2p	A2	Targeting	ADORA3_-_112031527.23-P1	CTTAAGGTTTGCCCATTCCCCCACCTTGTTGGGATGATGTTGCAGTAGTCAGTTTAAGAGCTAAGCTGACACCGTGGAAGCTATAACA
TM2p	A2	Targeting	ADORA3_-_112031553.23-P1	CTTAAGGTTTGCCCATTCCCCCACCTTGTTGGAGCCTCGGCACCAGTATTTGTTTAAGAGCTAAGCTGACACCGTGGAAGCTATAACA
TM2p	A2	Targeting	ADORA3_-_112031588.23-P1	CTTAAGGTTTGCCCATTCCCCCACCTTGTTGGTGGGCATTGTAGTTGCAGAGTTTAAGAGCTAAGCTGACACCGTGGAAGCTATAACA
TM2p	A2	Targeting	ADORA3_-_112031731.23-P1	CTTAAGGTTTGCCCATTCCCCCACCTTGTTGGGCAGCTCCTGCCCTCCTGAGTTTAAGAGCTAAGCTGACACCGTGGAAGCTATAACA
TM2p	A2	Targeting	ADORA3_-_112031987.23-P1	CTTAAGGTTTGCCCATTCCCCCACCTTGTTGGACACTGACAATACAAACAGGTTTAAGAGCTAAGCTGACACCGTGGAAGCTATAACA
TM2p	A2	Targeting	ADORA3_-_112046363.23-P2	CTTAAGGTTTGCCCATTCCCCCACCTTGTTGGAAGATAAGCAACCCTCTTCGTTTAAGAGCTAAGCTGACACCGTGGAAGCTATAACA
TM2p	A2	Targeting	ADORA3_-_112046467.23-P2	CTTAAGGTTTGCCCATTCCCCCACCTTGTTGGGCCATGAGTGGCATAGAGAGTTTAAGAGCTAAGCTGACACCGTGGAAGCTATAACA
TM2p	A2	Targeting	ADORA3_-_112046483.23-P2	CTTAAGGTTTGCCCATTCCCCCACCTTGTTGGAGAAGGCTCGAGACAAGATGTTTAAGAGCTAAGCTGACACCGTGGAAGCTATAACA
TM2p	A2	Targeting	ADORA3_-_112046535.23-P2	CTTAAGGTTTGCCCATTCCCCCACCTTGTTGGGGACAGTGCAGGATCAGGTGTTTAAGAGCTAAGCTGACACCGTGGAAGCTATAACA
TM2p	A2	Targeting	ADRA1A_+_26724815.23-P1P2	CTTAAGGTTTGCCCATTCCCCCACCTTGTTGGCGGTAGCAGCAGGAGATTAGTTTAAGAGCTAAGCTGACACCGTGGAAGCTATAACA
TM2p	A2	Targeting	ADRA1A_+_26724834.23-P1P2	CTTAAGGTTTGCCCATTCCCCCACCTTGTTGGCTGTTGCCGTAGAGTAATAGTTTAAGAGCTAAGCTGACACCGTGGAAGCTATAACA
TM2p	A2	Targeting	ADRA1A_+_26724893.23-P1P2	CTTAAGGTTTGCCCATTCCCCCACCTTGTTGGCTAGAACCCAACCCCCTCTGTTTAAGAGCTAAGCTGACACCGTGGAAGCTATAACA
TM2p	A2	Targeting	ADRA1A_+_26725046.23-P1P2	CTTAAGGTTTGCCCATTCCCCCACCTTGTTGGCACACAGCAATATCTAGCAGTTTAAGAGCTAAGCTGACACCGTGGAAGCTATAACA
TM2p	A2	Targeting	ADRA1A_+_26725296.23-P1P2	CTTAAGGTTTGCCCATTCCCCCACCTTGTTGGAAGTGAATCATATTAAATAGTTTAAGAGCTAAGCTGACACCGTGGAAGCTATAACA
TM2p	A2	Targeting	ADRA1A_-_26724849.23-P1P2	CTTAAGGTTTGCCCATTCCCCCACCTTGTTGGCTGCTACCGTATTACTCTAGTTTAAGAGCTAAGCTGACACCGTGGAAGCTATAACA
TM2p	A2	Targeting	ADRA1A_-_26724903.23-P1P2	CTTAAGGTTTGCCCATTCCCCCACCTTGTTGGTTTTCCTCTGGCCTAGAGGGTTTAAGAGCTAAGCTGACACCGTGGAAGCTATAACA
TM2p	A2	Targeting	ADRA1A_-_26724908.23-P1P2	CTTAAGGTTTGCCCATTCCCCCACCTTGTTGGCTCTGGCCTAGAGGGGGTTGTTTAAGAGCTAAGCTGACACCGTGGAAGCTATAACA
TM2p	A2	Targeting	ADRA1A_-_26725084.23-P1P2	CTTAAGGTTTGCCCATTCCCCCACCTTGTTGGGTGTGTATGGTGTGTTCATGTTTAAGAGCTAAGCTGACACCGTGGAAGCTATAACA
TM2p	A2	Targeting	ADRA1A_-_26725132.23-P1P2	CTTAAGGTTTGCCCATTCCCCCACCTTGTTGGGCTTGATTTGATTAACATTGTTTAAGAGCTAAGCTGACACCGTGGAAGCTATAACA
TM2p	A2	Targeting	ADRA1B_+_159343326.23-P1P2	CTTAAGGTTTGCCCATTCCCCCACCTTGTTGGTCCCAGGGCGCGCCCTCTGGTTTAAGAGCTAAGCTGACACCGTGGAAGCTATAACA
TM2p	A2	Targeting	ADRA1B_+_159343340.23-P1P2	CTTAAGGTTTGCCCATTCCCCCACCTTGTTGGGCGTCCCCCGCCGCTCCCAGTTTAAGAGCTAAGCTGACACCGTGGAAGCTATAACA
TM2p	A2	Targeting	ADRA1B_+_159343419.23-P1P2	CTTAAGGTTTGCCCATTCCCCCACCTTGTTGGCGGCACTAGGGGGCAATGCGTTTAAGAGCTAAGCTGACACCGTGGAAGCTATAACA
TM2p	A2	Targeting	ADRA1B_+_159343463.23-P1P2	CTTAAGGTTTGCCCATTCCCCCACCTTGTTGGCGGCGGTGACATCAGGCGGGTTTAAGAGCTAAGCTGACACCGTGGAAGCTATAACA
TM2p	A2	Targeting	ADRA1B_+_159343466.23-P1P2	CTTAAGGTTTGCCCATTCCCCCACCTTGTTGGGCACGGCGGTGACATCAGGGTTTAAGAGCTAAGCTGACACCGTGGAAGCTATAACA
TM2p	A2	Targeting	ADRA1B_+_159343520.23-P1P2	CTTAAGGTTTGCCCATTCCCCCACCTTGTTGGGCCCAGCGAGCGCCGAAGAGTTTAAGAGCTAAGCTGACACCGTGGAAGCTATAACA
TM2p	A2	Targeting	ADRA1B_-_159343261.23-P1P2	CTTAAGGTTTGCCCATTCCCCCACCTTGTTGGAACCCCAGCGGGCCGCCTAGTTTAAGAGCTAAGCTGACACCGTGGAAGCTATAACA
TM2p	A2	Targeting	ADRA1B_-_159343265.23-P1P2	CTTAAGGTTTGCCCATTCCCCCACCTTGTTGGCCAGCGGGCCGCCTAGGGGGTTTAAGAGCTAAGCTGACACCGTGGAAGCTATAACA
TM2p	A2	Targeting	ADRA1B_-_159343387.23-P1P2	CTTAAGGTTTGCCCATTCCCCCACCTTGTTGGGGCTTCCCGGCTTGCGGGGGTTTAAGAGCTAAGCTGACACCGTGGAAGCTATAACA
TM2p	A2	Targeting	ADRA1B_-_159343398.23-P1P2	CTTAAGGTTTGCCCATTCCCCCACCTTGTTGGTTGCGGGGTGGCGGCGTCGGTTTAAGAGCTAAGCTGACACCGTGGAAGCTATAACA
TM2p	A2	Targeting	ADRA1D_+_4230139.23-P1P2	CTTAAGGTTTGCCCATTCCCCCACCTTGTTGGCACCGCTAGGGGAGAGCGCGTTTAAGAGCTAAGCTGACACCGTGGAAGCTATAACA
TM2p	A2	Targeting	ADRA1D_+_4230150.23-P1P2	CTTAAGGTTTGCCCATTCCCCCACCTTGTTGGAACGCAAAGGGCACCGCTAGTTTAAGAGCTAAGCTGACACCGTGGAAGCTATAACA
TM2p	A2	Targeting	ADRA1D_+_4230241.23-P1P2	CTTAAGGTTTGCCCATTCCCCCACCTTGTTGGGAGTGACCGAGAGACTCGGGTTTAAGAGCTAAGCTGACACCGTGGAAGCTATAACA
TM2p	A2	Targeting	ADRA1D_+_4230414.23-P1P2	CTTAAGGTTTGCCCATTCCCCCACCTTGTTGGGAGGTGCGGCAGATCCATGGTTTAAGAGCTAAGCTGACACCGTGGAAGCTATAACA
TM2p	A2	Targeting	ADRA1D_-_4229290.23-P1P2	CTTAAGGTTTGCCCATTCCCCCACCTTGTTGGGCCACGGCCATAAGGATGAGTTTAAGAGCTAAGCTGACACCGTGGAAGCTATAACA
TM2p	A2	Targeting	ADRA1D_-_4229982.23-P1P2	CTTAAGGTTTGCCCATTCCCCCACCTTGTTGGAGGGGCAGCGCCAGGAAGGGTTTAAGAGCTAAGCTGACACCGTGGAAGCTATAACA
TM2p	A2	Targeting	ADRA1D_-_4230023.23-P1P2	CTTAAGGTTTGCCCATTCCCCCACCTTGTTGGGAGACGGGCGCCACACTCCGTTTAAGAGCTAAGCTGACACCGTGGAAGCTATAACA
TM2p	A2	Targeting	ADRA1D_-_4230032.23-P1P2	CTTAAGGTTTGCCCATTCCCCCACCTTGTTGGGCCACACTCCAGGGTAGAAGTTTAAGAGCTAAGCTGACACCGTGGAAGCTATAACA
TM2p	A2	Targeting	ADRA1D_-_4230046.23-P1P2	CTTAAGGTTTGCCCATTCCCCCACCTTGTTGGTAGAAGGGACCCTTCGCTCGTTTAAGAGCTAAGCTGACACCGTGGAAGCTATAACA
TM2p	A2	Targeting	ADRA1D_-_4230408.23-P1P2	CTTAAGGTTTGCCCATTCCCCCACCTTGTTGGCCGCTGCGGGTTGCCTCCTGTTTAAGAGCTAAGCTGACACCGTGGAAGCTATAACA
TM2p	A2	Targeting	ADRA2A_+_112836477.23-P1P2	CTTAAGGTTTGCCCATTCCCCCACCTTGTTGGCCGACGGAGCAGAACGCAAGTTTAAGAGCTAAGCTGACACCGTGGAAGCTATAACA
TM2p	A2	Targeting	ADRA2A_+_112836593.23-P1P2	CTTAAGGTTTGCCCATTCCCCCACCTTGTTGGCGGGACGAGCCCTTTGGAGGTTTAAGAGCTAAGCTGACACCGTGGAAGCTATAACA
TM2p	A2	Targeting	ADRA2A_+_112836615.23-P1P2	CTTAAGGTTTGCCCATTCCCCCACCTTGTTGGCTCGGGGAGCGTTGCCCTCGTTTAAGAGCTAAGCTGACACCGTGGAAGCTATAACA
TM2p	A2	Targeting	ADRA2A_+_112836632.23-P1P2	CTTAAGGTTTGCCCATTCCCCCACCTTGTTGGCGCGCCTAGCGCTGGACCTGTTTAAGAGCTAAGCTGACACCGTGGAAGCTATAACA
TM2p	A2	Targeting	ADRA2A_+_112836704.23-P1P2	CTTAAGGTTTGCCCATTCCCCCACCTTGTTGGCCGGCGTCAGCCCCCACGTGTTTAAGAGCTAAGCTGACACCGTGGAAGCTATAACA
TM2p	A2	Targeting	ADRA2A_-_112836605.23-P1P2	CTTAAGGTTTGCCCATTCCCCCACCTTGTTGGAGGTACCCGCCTCTCCAAAGTTTAAGAGCTAAGCTGACACCGTGGAAGCTATAACA
TM2p	A2	Targeting	ADRA2A_-_112836666.23-P1P2	CTTAAGGTTTGCCCATTCCCCCACCTTGTTGGCTAGGCGCGGGCGCTAGACGTTTAAGAGCTAAGCTGACACCGTGGAAGCTATAACA
TM2p	A2	Targeting	ADRA2A_-_112836669.23-P1P2	CTTAAGGTTTGCCCATTCCCCCACCTTGTTGGGGCGCGGGCGCTAGACTGGGTTTAAGAGCTAAGCTGACACCGTGGAAGCTATAACA
TM2p	A2	Targeting	ADRA2A_-_112836673.23-P1P2	CTTAAGGTTTGCCCATTCCCCCACCTTGTTGGCGGGCGCTAGACTGGCGGAGTTTAAGAGCTAAGCTGACACCGTGGAAGCTATAACA
TM2p	A2	Targeting	ADRA2A_-_112836677.23-P1P2	CTTAAGGTTTGCCCATTCCCCCACCTTGTTGGCGCTAGACTGGCGGAGGGGGTTTAAGAGCTAAGCTGACACCGTGGAAGCTATAACA
TM2p	A2	Targeting	ADRA2B_+_96782430.23-P1P2	CTTAAGGTTTGCCCATTCCCCCACCTTGTTGGTCCGGGCGCGGGAAGTCCCGTTTAAGAGCTAAGCTGACACCGTGGAAGCTATAACA
TM2p	A2	Targeting	ADRA2B_+_96782447.23-P1P2	CTTAAGGTTTGCCCATTCCCCCACCTTGTTGGAGAGGCGCTGGGCGGGGTCGTTTAAGAGCTAAGCTGACACCGTGGAAGCTATAACA
TM2p	A2	Targeting	ADRA2B_+_96782458.23-P1P2	CTTAAGGTTTGCCCATTCCCCCACCTTGTTGGGGAAGGCAGGTAGAGGCGCGTTTAAGAGCTAAGCTGACACCGTGGAAGCTATAACA
TM2p	A2	Targeting	ADRA2B_+_96782815.23-P1P2	CTTAAGGTTTGCCCATTCCCCCACCTTGTTGGCCTGGGAAAGGGTCGGGACGTTTAAGAGCTAAGCTGACACCGTGGAAGCTATAACA
TM2p	A2	Targeting	ADRA2B_+_96782825.23-P1P2	CTTAAGGTTTGCCCATTCCCCCACCTTGTTGGAGGGGCAGCGCCTGGGAAAGTTTAAGAGCTAAGCTGACACCGTGGAAGCTATAACA
TM2p	A2	Targeting	ADRA2B_-_96782419.23-P1P2	CTTAAGGTTTGCCCATTCCCCCACCTTGTTGGGGGCTGAAGGTGCGCTTCGGTTTAAGAGCTAAGCTGACACCGTGGAAGCTATAACA
TM2p	A2	Targeting	ADRA2B_-_96782423.23-P1P2	CTTAAGGTTTGCCCATTCCCCCACCTTGTTGGTGAAGGTGCGCTTCGCGGGGTTTAAGAGCTAAGCTGACACCGTGGAAGCTATAACA
TM2p	A2	Targeting	ADRA2B_-_96782435.23-P1P2	CTTAAGGTTTGCCCATTCCCCCACCTTGTTGGTCGCGGGAGGCGTGAGCCCGTTTAAGAGCTAAGCTGACACCGTGGAAGCTATAACA
TM2p	A2	Targeting	ADRA2B_-_96782512.23-P1P2	CTTAAGGTTTGCCCATTCCCCCACCTTGTTGGGCGCCTCGGGAGAGCGGAGGTTTAAGAGCTAAGCTGACACCGTGGAAGCTATAACA
TM2p	A2	Targeting	ADRA2B_-_96782574.23-P1P2	CTTAAGGTTTGCCCATTCCCCCACCTTGTTGGCAGCTGTGGAGGGGTCGGTGTTTAAGAGCTAAGCTGACACCGTGGAAGCTATAACA
TM2p	A2	Targeting	ADRA2C_+_3767326.23-P1P2	CTTAAGGTTTGCCCATTCCCCCACCTTGTTGGCCTCCCCCGGCGCAGGCATGTTTAAGAGCTAAGCTGACACCGTGGAAGCTATAACA
TM2p	A2	Targeting	ADRA2C_+_3767394.23-P1P2	CTTAAGGTTTGCCCATTCCCCCACCTTGTTGGGCCGAGCGGCGGCCGGCCTGTTTAAGAGCTAAGCTGACACCGTGGAAGCTATAACA
TM2p	A2	Targeting	ADRA2C_+_3767439.23-P1P2	CTTAAGGTTTGCCCATTCCCCCACCTTGTTGGGGCGAGGGCGCCCCCTCCAGTTTAAGAGCTAAGCTGACACCGTGGAAGCTATAACA
TM2p	A2	Targeting	ADRA2C_+_3767496.23-P1P2	CTTAAGGTTTGCCCATTCCCCCACCTTGTTGGAACCTGCCCGCGCGGCGCCGTTTAAGAGCTAAGCTGACACCGTGGAAGCTATAACA
TM2p	A2	Targeting	ADRA2C_+_3767610.23-P1P2	CTTAAGGTTTGCCCATTCCCCCACCTTGTTGGTGCGATCGGCTTCCAACTTGTTTAAGAGCTAAGCTGACACCGTGGAAGCTATAACA
TM2p	A2	Targeting	ADRA2C_+_3767752.23-P1P2	CTTAAGGTTTGCCCATTCCCCCACCTTGTTGGGGCGCCGCCGCGAGTCCTCGTTTAAGAGCTAAGCTGACACCGTGGAAGCTATAACA
TM2p	A2	Targeting	ADRA2C_+_3767867.23-P1P2	CTTAAGGTTTGCCCATTCCCCCACCTTGTTGGCCTCCCATCCGGCCGGCTAGTTTAAGAGCTAAGCTGACACCGTGGAAGCTATAACA
TM2p	A2	Targeting	ADRA2C_-_3767343.23-P1P2	CTTAAGGTTTGCCCATTCCCCCACCTTGTTGGTGCGCCCATGCCTGCGCCGGTTTAAGAGCTAAGCTGACACCGTGGAAGCTATAACA
TM2p	A2	Targeting	ADRA2C_-_3767525.23-P1P2	CTTAAGGTTTGCCCATTCCCCCACCTTGTTGGCGCGCGGGCAGGTTCGACCGTTTAAGAGCTAAGCTGACACCGTGGAAGCTATAACA
TM2p	A2	Targeting	ADRA2C_-_3767801.23-P1P2	CTTAAGGTTTGCCCATTCCCCCACCTTGTTGGCCGCCCGGGAAAGTAAAGTGTTTAAGAGCTAAGCTGACACCGTGGAAGCTATAACA
TM2p	A2	Targeting	ADRB1_+_115803442.23-P1P2	CTTAAGGTTTGCCCATTCCCCCACCTTGTTGGCCTCCCGTTGGCAATTGAGGTTTAAGAGCTAAGCTGACACCGTGGAAGCTATAACA
TM2p	A2	Targeting	ADRB1_+_115803496.23-P1P2	CTTAAGGTTTGCCCATTCCCCCACCTTGTTGGGCAAAGGCACGCCCCCGTCGTTTAAGAGCTAAGCTGACACCGTGGAAGCTATAACA
TM2p	A2	Targeting	ADRB1_+_115803536.23-P1P2	CTTAAGGTTTGCCCATTCCCCCACCTTGTTGGACCCCCGGGGCCTCGCGTCGTTTAAGAGCTAAGCTGACACCGTGGAAGCTATAACA
TM2p	A2	Targeting	ADRB1_+_115803548.23-P1P2	CTTAAGGTTTGCCCATTCCCCCACCTTGTTGGCTCCCCAAGCCAACCCCCGGTTTAAGAGCTAAGCTGACACCGTGGAAGCTATAACA
TM2p	A2	Targeting	ADRB1_-_115803330.23-P1P2	CTTAAGGTTTGCCCATTCCCCCACCTTGTTGGGGGAGCCAGGCGCGGAAGGGTTTAAGAGCTAAGCTGACACCGTGGAAGCTATAACA
TM2p	A2	Targeting	ADRB1_-_115803373.23-P1P2	CTTAAGGTTTGCCCATTCCCCCACCTTGTTGGAACCAGCGGGCGCAGGAAGGTTTAAGAGCTAAGCTGACACCGTGGAAGCTATAACA
TM2p	A2	Targeting	ADRB1_-_115803439.23-P1P2	CTTAAGGTTTGCCCATTCCCCCACCTTGTTGGCGATCAGCTCGGGACTCTCGTTTAAGAGCTAAGCTGACACCGTGGAAGCTATAACA
TM2p	A2	Targeting	ADRB1_-_115803460.23-P1P2	CTTAAGGTTTGCCCATTCCCCCACCTTGTTGGGAGCCGCTCAATTGCCAACGTTTAAGAGCTAAGCTGACACCGTGGAAGCTATAACA
TM2p	A2	Targeting	ADRB1_-_115803473.23-P1P2	CTTAAGGTTTGCCCATTCCCCCACCTTGTTGGGCCAACGGGAGGGGGGTGCGTTTAAGAGCTAAGCTGACACCGTGGAAGCTATAACA
TM2p	A2	Targeting	ADRB1_-_115803567.23-P1P2	CTTAAGGTTTGCCCATTCCCCCACCTTGTTGGGGCCCCGGGGGTTGGCTTGGTTTAAGAGCTAAGCTGACACCGTGGAAGCTATAACA
TM2p	A2	Targeting	ADRB2_+_148206012.23-P1P2	CTTAAGGTTTGCCCATTCCCCCACCTTGTTGGCTCCTGGGGCTGGCCCGGGGTTTAAGAGCTAAGCTGACACCGTGGAAGCTATAACA
TM2p	A2	Targeting	ADRB2_+_148206078.23-P1P2	CTTAAGGTTTGCCCATTCCCCCACCTTGTTGGGCACGCCGGCAGCCGCGAAGTTTAAGAGCTAAGCTGACACCGTGGAAGCTATAACA
TM2p	A2	Targeting	ADRB2_+_148206115.23-P1P2	CTTAAGGTTTGCCCATTCCCCCACCTTGTTGGTGCCCTCGCCGTGACGTACGTTTAAGAGCTAAGCTGACACCGTGGAAGCTATAACA
TM2p	A2	Targeting	ADRB2_+_148206140.23-P1P2	CTTAAGGTTTGCCCATTCCCCCACCTTGTTGGTATGTGCACAGGACTTTAGGTTTAAGAGCTAAGCTGACACCGTGGAAGCTATAACA
TM2p	A2	Targeting	ADRB2_-_148205917.23-P1P2	CTTAAGGTTTGCCCATTCCCCCACCTTGTTGGGAGCCAAAAGCTCCCGGGTGTTTAAGAGCTAAGCTGACACCGTGGAAGCTATAACA
TM2p	A2	Targeting	ADRB2_-_148205926.23-P1P2	CTTAAGGTTTGCCCATTCCCCCACCTTGTTGGGCTCCCGGGTTGGCTGGTAGTTTAAGAGCTAAGCTGACACCGTGGAAGCTATAACA
TM2p	A2	Targeting	ADRB2_-_148205999.23-P1P2	CTTAAGGTTTGCCCATTCCCCCACCTTGTTGGAGTGGTGGCCCGCCCTCCAGTTTAAGAGCTAAGCTGACACCGTGGAAGCTATAACA
TM2p	A2	Targeting	ADRB2_-_148206009.23-P1P2	CTTAAGGTTTGCCCATTCCCCCACCTTGTTGGCGCCCTCCAGGGAGCAGTTGTTTAAGAGCTAAGCTGACACCGTGGAAGCTATAACA
TM2p	A2	Targeting	ADRB2_-_148206087.23-P1P2	CTTAAGGTTTGCCCATTCCCCCACCTTGTTGGGGAGTGCCTCGCCCCTTCGGTTTAAGAGCTAAGCTGACACCGTGGAAGCTATAACA
TM2p	A2	Targeting	ADRB2_-_148206134.23-P1P2	CTTAAGGTTTGCCCATTCCCCCACCTTGTTGGTTCCCGTACGTCACGGCGAGTTTAAGAGCTAAGCTGACACCGTGGAAGCTATAACA
TM2p	A2	Targeting	ADRB3_+_37823983.23-P1P2	CTTAAGGTTTGCCCATTCCCCCACCTTGTTGGCCCACGCGCGACCCGGGGAGTTTAAGAGCTAAGCTGACACCGTGGAAGCTATAACA
TM2p	A2	Targeting	ADRB3_+_37824159.23-P1P2	CTTAAGGTTTGCCCATTCCCCCACCTTGTTGGACTCCTCCCCCAAGAGCGGGTTTAAGAGCTAAGCTGACACCGTGGAAGCTATAACA
TM2p	A2	Targeting	ADRB3_+_37824255.23-P1P2	CTTAAGGTTTGCCCATTCCCCCACCTTGTTGGGAAACGTGGAGCATCCCATGTTTAAGAGCTAAGCTGACACCGTGGAAGCTATAACA
TM2p	A2	Targeting	ADRB3_+_37824351.23-P1P2	CTTAAGGTTTGCCCATTCCCCCACCTTGTTGGGGAGTGCTATGCTGAGTCCGTTTAAGAGCTAAGCTGACACCGTGGAAGCTATAACA
TM2p	A2	Targeting	ADRB3_+_37824598.23-P1P2	CTTAAGGTTTGCCCATTCCCCCACCTTGTTGGCTCACCAAGCTGAGGTCTTGTTTAAGAGCTAAGCTGACACCGTGGAAGCTATAACA
TM2p	A2	Targeting	ADRB3_-_37823380.23-P1P2	CTTAAGGTTTGCCCATTCCCCCACCTTGTTGGAGGAGGACAGCAGCACGTAGTTTAAGAGCTAAGCTGACACCGTGGAAGCTATAACA
TM2p	A2	Targeting	ADRB3_-_37824238.23-P1P2	CTTAAGGTTTGCCCATTCCCCCACCTTGTTGGGGGGCCTCTGGAGCCGAATGTTTAAGAGCTAAGCTGACACCGTGGAAGCTATAACA
TM2p	A2	Targeting	ADRB3_-_37824247.23-P1P2	CTTAAGGTTTGCCCATTCCCCCACCTTGTTGGGGAGCCGAATTGGAGAGTGGTTTAAGAGCTAAGCTGACACCGTGGAAGCTATAACA
TM2p	A2	Targeting	ADRB3_-_37824261.23-P1P2	CTTAAGGTTTGCCCATTCCCCCACCTTGTTGGGAGTGGGGAGGATGGCCAAGTTTAAGAGCTAAGCTGACACCGTGGAAGCTATAACA
TM2p	A2	Targeting	ADRB3_-_37824377.23-P1P2	CTTAAGGTTTGCCCATTCCCCCACCTTGTTGGACTCAGCATAGCACTCCCTGTTTAAGAGCTAAGCTGACACCGTGGAAGCTATAACA
TM2p	A2	Targeting	ADTRP_+_11779041.23-P1P2	CTTAAGGTTTGCCCATTCCCCCACCTTGTTGGTTAGGCTGTGACCCACAGAGTTTAAGAGCTAAGCTGACACCGTGGAAGCTATAACA
TM2p	A2	Targeting	ADTRP_+_11779058.23-P1P2	CTTAAGGTTTGCCCATTCCCCCACCTTGTTGGCCGGCCTGCTGTTGGACTTGTTTAAGAGCTAAGCTGACACCGTGGAAGCTATAACA
TM2p	A2	Targeting	ADTRP_+_11779076.23-P1P2	CTTAAGGTTTGCCCATTCCCCCACCTTGTTGGGGTGTGGTTTGTAGCTCTCGTTTAAGAGCTAAGCTGACACCGTGGAAGCTATAACA
TM2p	A2	Targeting	ADTRP_+_11779097.23-P1P2	CTTAAGGTTTGCCCATTCCCCCACCTTGTTGGTGGAACTCTCAGTCCCAGAGTTTAAGAGCTAAGCTGACACCGTGGAAGCTATAACA
TM2p	A2	Targeting	ADTRP_+_11779116.23-P1P2	CTTAAGGTTTGCCCATTCCCCCACCTTGTTGGAACCAAATTCAGCCTGTGTGTTTAAGAGCTAAGCTGACACCGTGGAAGCTATAACA
TM2p	A2	Targeting	ADTRP_+_11779155.23-P1P2	CTTAAGGTTTGCCCATTCCCCCACCTTGTTGGCCTGCCTCTGAAGTTTATCGTTTAAGAGCTAAGCTGACACCGTGGAAGCTATAACA
TM2p	A2	Targeting	ADTRP_-_11779104.23-P1P2	CTTAAGGTTTGCCCATTCCCCCACCTTGTTGGGCTACAAACCACACCCCTCGTTTAAGAGCTAAGCTGACACCGTGGAAGCTATAACA
TM2p	A2	Targeting	ADTRP_-_11779125.23-P1P2	CTTAAGGTTTGCCCATTCCCCCACCTTGTTGGGGACTGAGAGTTCCAACACGTTTAAGAGCTAAGCTGACACCGTGGAAGCTATAACA
TM2p	A2	Targeting	ADTRP_-_11779135.23-P1P2	CTTAAGGTTTGCCCATTCCCCCACCTTGTTGGTTCCAACACAGGCTGAATTGTTTAAGAGCTAAGCTGACACCGTGGAAGCTATAACA
TM2p	A2	Targeting	ADTRP_-_11779187.23-P1P2	CTTAAGGTTTGCCCATTCCCCCACCTTGTTGGTCAGAGGCAGGATTACTGCGTTTAAGAGCTAAGCTGACACCGTGGAAGCTATAACA
TM2p	A2	Targeting	AGTR2_+_115301659.23-P1P2	CTTAAGGTTTGCCCATTCCCCCACCTTGTTGGAAATTAGTGAGTAGAGACTGTTTAAGAGCTAAGCTGACACCGTGGAAGCTATAACA
TM2p	A2	Targeting	AGTR2_+_115301747.23-P1P2	CTTAAGGTTTGCCCATTCCCCCACCTTGTTGGAGTCAGTGGCTTACTTGGTGTTTAAGAGCTAAGCTGACACCGTGGAAGCTATAACA
TM2p	A2	Targeting	AGTR2_+_115301751.23-P1P2	CTTAAGGTTTGCCCATTCCCCCACCTTGTTGGTTGAAGTCAGTGGCTTACTGTTTAAGAGCTAAGCTGACACCGTGGAAGCTATAACA
TM2p	A2	Targeting	AGTR2_+_115301950.23-P1P2	CTTAAGGTTTGCCCATTCCCCCACCTTGTTGGTATGTTTGGTCTGTCCACTGTTTAAGAGCTAAGCTGACACCGTGGAAGCTATAACA
TM2p	A2	Targeting	AGTR2_-_115301529.23-P1P2	CTTAAGGTTTGCCCATTCCCCCACCTTGTTGGCAAAAACTGCGCAAAGCAAGTTTAAGAGCTAAGCTGACACCGTGGAAGCTATAACA
TM2p	A2	Targeting	AGTR2_-_115301793.23-P1P2	CTTAAGGTTTGCCCATTCCCCCACCTTGTTGGAAATTCTCTAGCACATTTGGTTTAAGAGCTAAGCTGACACCGTGGAAGCTATAACA
TM2p	A2	Targeting	AGTR2_-_115301844.23-P1P2	CTTAAGGTTTGCCCATTCCCCCACCTTGTTGGTTGAATGAGCTGTTATGATGTTTAAGAGCTAAGCTGACACCGTGGAAGCTATAACA
TM2p	A2	Targeting	AGTR2_-_115301947.23-P1P2	CTTAAGGTTTGCCCATTCCCCCACCTTGTTGGCTAGAATTATGTAGGTTGAGTTTAAGAGCTAAGCTGACACCGTGGAAGCTATAACA
TM2p	A2	Targeting	AGTR2_-_115301957.23-P1P2	CTTAAGGTTTGCCCATTCCCCCACCTTGTTGGGTAGGTTGAAGGCTCCCAGGTTTAAGAGCTAAGCTGACACCGTGGAAGCTATAACA
TM2p	A2	Targeting	AGTR2_-_115301979.23-P1P2	CTTAAGGTTTGCCCATTCCCCCACCTTGTTGGACAGACCAAACATATAAGAGTTTAAGAGCTAAGCTGACACCGTGGAAGCTATAACA
TM2p	A2	Targeting	AGTRAP_+_11795963.23-P1P2	CTTAAGGTTTGCCCATTCCCCCACCTTGTTGGGCCCAGGGCGTATCCTGCCGTTTAAGAGCTAAGCTGACACCGTGGAAGCTATAACA
TM2p	A2	Targeting	AGTRAP_+_11796014.23-P1P2	CTTAAGGTTTGCCCATTCCCCCACCTTGTTGGCACCGCCCAGGCAGTACTTGTTTAAGAGCTAAGCTGACACCGTGGAAGCTATAACA
TM2p	A2	Targeting	AGTRAP_+_11796071.23-P1P2	CTTAAGGTTTGCCCATTCCCCCACCTTGTTGGGGTTGCTAGGAGACGGCGTGTTTAAGAGCTAAGCTGACACCGTGGAAGCTATAACA
TM2p	A2	Targeting	AGTRAP_+_11796083.23-P1P2	CTTAAGGTTTGCCCATTCCCCCACCTTGTTGGTGACCGCCGCTTGGTTGCTGTTTAAGAGCTAAGCTGACACCGTGGAAGCTATAACA
TM2p	A2	Targeting	AGTRAP_+_11796110.23-P1P2	CTTAAGGTTTGCCCATTCCCCCACCTTGTTGGACGTGAAACGGGCTGGAGCGTTTAAGAGCTAAGCTGACACCGTGGAAGCTATAACA
TM2p	A2	Targeting	AGTRAP_+_11796121.23-P1P2	CTTAAGGTTTGCCCATTCCCCCACCTTGTTGGAGCTCAAGACCACGTGAAAGTTTAAGAGCTAAGCTGACACCGTGGAAGCTATAACA
TM2p	A2	Targeting	AGTRAP_-_11796030.23-P1P2	CTTAAGGTTTGCCCATTCCCCCACCTTGTTGGCGGCCCCCAAGTACTGCCTGTTTAAGAGCTAAGCTGACACCGTGGAAGCTATAACA
TM2p	A2	Targeting	AGTRAP_-_11796061.23-P1P2	CTTAAGGTTTGCCCATTCCCCCACCTTGTTGGGAGTCTGGAGCTTGGCTGAGTTTAAGAGCTAAGCTGACACCGTGGAAGCTATAACA
TM2p	A2	Targeting	AGTRAP_-_11796098.23-P1P2	CTTAAGGTTTGCCCATTCCCCCACCTTGTTGGCCGTCTCCTAGCAACCAAGGTTTAAGAGCTAAGCTGACACCGTGGAAGCTATAACA
TM2p	A2	Targeting	AGTRAP_-_11796101.23-P1P2	CTTAAGGTTTGCCCATTCCCCCACCTTGTTGGTCTCCTAGCAACCAAGCGGGTTTAAGAGCTAAGCTGACACCGTGGAAGCTATAACA
TM2p	A2	Targeting	AIG1_+_143381471.23-P1P2	CTTAAGGTTTGCCCATTCCCCCACCTTGTTGGCCGGTGGGGGTGTGAACGTGTTTAAGAGCTAAGCTGACACCGTGGAAGCTATAACA
TM2p	A2	Targeting	AIG1_+_143381495.23-P1P2	CTTAAGGTTTGCCCATTCCCCCACCTTGTTGGAGCTGGTGCCCCGTGCGGAGTTTAAGAGCTAAGCTGACACCGTGGAAGCTATAACA
TM2p	A2	Targeting	AIG1_+_143381536.23-P1P2	CTTAAGGTTTGCCCATTCCCCCACCTTGTTGGAATCGCGGTGACGCTTCCTGTTTAAGAGCTAAGCTGACACCGTGGAAGCTATAACA
TM2p	A2	Targeting	AIG1_+_143381687.23-P1P2	CTTAAGGTTTGCCCATTCCCCCACCTTGTTGGCGACCTCTGAGTGCTACGAGTTTAAGAGCTAAGCTGACACCGTGGAAGCTATAACA
TM2p	A2	Targeting	AIG1_+_143381717.23-P1P2	CTTAAGGTTTGCCCATTCCCCCACCTTGTTGGGGCGCCCCCTAGGCATCCCGTTTAAGAGCTAAGCTGACACCGTGGAAGCTATAACA
TM2p	A2	Targeting	AIG1_-_143381578.23-P1P2	CTTAAGGTTTGCCCATTCCCCCACCTTGTTGGTCCGGGGCGGGAACATTTGGTTTAAGAGCTAAGCTGACACCGTGGAAGCTATAACA
TM2p	A2	Targeting	AIG1_-_143381758.23-P1P2	CTTAAGGTTTGCCCATTCCCCCACCTTGTTGGCCTCCTGGCCGGGTGTCCCGTTTAAGAGCTAAGCTGACACCGTGGAAGCTATAACA
TM2p	A2	Targeting	AIG1_-_143381790.23-P1P2	CTTAAGGTTTGCCCATTCCCCCACCTTGTTGGCGCAGGAGCAGAATGACGAGTTTAAGAGCTAAGCTGACACCGTGGAAGCTATAACA
TM2p	A2	Targeting	AIG1_-_143381882.23-P1P2	CTTAAGGTTTGCCCATTCCCCCACCTTGTTGGCCGGCCAGTACAGGTCACCGTTTAAGAGCTAAGCTGACACCGTGGAAGCTATAACA
TM2p	A2	Targeting	AIG1_-_143381909.23-P1P2	CTTAAGGTTTGCCCATTCCCCCACCTTGTTGGCGCGGCCGCGCCAGTCCCCGTTTAAGAGCTAAGCTGACACCGTGGAAGCTATAACA
TM2p	A2	Targeting	ALDH16A1_+_49956325.23-P1P2	CTTAAGGTTTGCCCATTCCCCCACCTTGTTGGGAAGGGGAGACGGCGATGTGTTTAAGAGCTAAGCTGACACCGTGGAAGCTATAACA
TM2p	A2	Targeting	ALDH16A1_+_49956341.23-P1P2	CTTAAGGTTTGCCCATTCCCCCACCTTGTTGGTGCTTAAAACGGGGAGGAAGTTTAAGAGCTAAGCTGACACCGTGGAAGCTATAACA
TM2p	A2	Targeting	ALDH16A1_+_49956346.23-P1P2	CTTAAGGTTTGCCCATTCCCCCACCTTGTTGGCGCACTGCTTAAAACGGGGGTTTAAGAGCTAAGCTGACACCGTGGAAGCTATAACA
TM2p	A2	Targeting	ALDH16A1_+_49956389.23-P1P2	CTTAAGGTTTGCCCATTCCCCCACCTTGTTGGGCCCCGCCTACGTCCCCCAGTTTAAGAGCTAAGCTGACACCGTGGAAGCTATAACA
TM2p	A2	Targeting	ALDH16A1_+_49956469.23-P1P2	CTTAAGGTTTGCCCATTCCCCCACCTTGTTGGGGGCGGGGCTAATGGGAATGTTTAAGAGCTAAGCTGACACCGTGGAAGCTATAACA
TM2p	A2	Targeting	ALDH16A1_+_49956475.23-P1P2	CTTAAGGTTTGCCCATTCCCCCACCTTGTTGGCCAAAGGGGCGGGGCTAATGTTTAAGAGCTAAGCTGACACCGTGGAAGCTATAACA
TM2p	A2	Targeting	ALDH16A1_-_49956395.23-P1P2	CTTAAGGTTTGCCCATTCCCCCACCTTGTTGGCCTAAATACGCTTCCCCGTGTTTAAGAGCTAAGCTGACACCGTGGAAGCTATAACA
TM2p	A2	Targeting	ALDH16A1_-_49956407.23-P1P2	CTTAAGGTTTGCCCATTCCCCCACCTTGTTGGTCCCCGTGGGGGACGTAGGGTTTAAGAGCTAAGCTGACACCGTGGAAGCTATAACA
TM2p	A2	Targeting	ALDH16A1_-_49956416.23-P1P2	CTTAAGGTTTGCCCATTCCCCCACCTTGTTGGGGGACGTAGGCGGGGCCATGTTTAAGAGCTAAGCTGACACCGTGGAAGCTATAACA
TM2p	A2	Targeting	ALDH16A1_-_49956436.23-P1P2	CTTAAGGTTTGCCCATTCCCCCACCTTGTTGGGGGTCCTAAGGAAAAAGTGGTTTAAGAGCTAAGCTGACACCGTGGAAGCTATAACA
TM2p	A2	Targeting	ALOX5AP_+_31309514.23-P1P2	CTTAAGGTTTGCCCATTCCCCCACCTTGTTGGGTGTCCCACCAGGAGAAGCGTTTAAGAGCTAAGCTGACACCGTGGAAGCTATAACA
TM2p	A2	Targeting	ALOX5AP_+_31309542.23-P1P2	CTTAAGGTTTGCCCATTCCCCCACCTTGTTGGCACCAAAATGCCCTGGCTGGTTTAAGAGCTAAGCTGACACCGTGGAAGCTATAACA
TM2p	A2	Targeting	ALOX5AP_+_31309673.23-P1P2	CTTAAGGTTTGCCCATTCCCCCACCTTGTTGGAACCTGCCCTGTACAGGAAGTTTAAGAGCTAAGCTGACACCGTGGAAGCTATAACA
TM2p	A2	Targeting	ALOX5AP_-_31309324.23-P1P2	CTTAAGGTTTGCCCATTCCCCCACCTTGTTGGTGTCTGACCTGAAAGTTTTGTTTAAGAGCTAAGCTGACACCGTGGAAGCTATAACA
TM2p	A2	Targeting	ALOX5AP_-_31309386.23-P1P2	CTTAAGGTTTGCCCATTCCCCCACCTTGTTGGTGGCAGCTTCCAGATTCTCGTTTAAGAGCTAAGCTGACACCGTGGAAGCTATAACA
TM2p	A2	Targeting	ALOX5AP_-_31309422.23-P1P2	CTTAAGGTTTGCCCATTCCCCCACCTTGTTGGTCGTGCTGGTCATGGTCTTGTTTAAGAGCTAAGCTGACACCGTGGAAGCTATAACA
TM2p	A2	Targeting	ALOX5AP_-_31309469.23-P1P2	CTTAAGGTTTGCCCATTCCCCCACCTTGTTGGAGGGAAGTTTCCCATGACAGTTTAAGAGCTAAGCTGACACCGTGGAAGCTATAACA
TM2p	A2	Targeting	ALOX5AP_-_31309561.23-P1P2	CTTAAGGTTTGCCCATTCCCCCACCTTGTTGGAACCACAGCCAGGGCATTTGTTTAAGAGCTAAGCTGACACCGTGGAAGCTATAACA
TM2p	A2	Targeting	ALOX5AP_-_31309628.23-P1P2	CTTAAGGTTTGCCCATTCCCCCACCTTGTTGGGCACTGTGTAATTGTGCCGGTTTAAGAGCTAAGCTGACACCGTGGAAGCTATAACA
TM2p	A2	Targeting	ALOX5AP_-_31309692.23-P1P2	CTTAAGGTTTGCCCATTCCCCCACCTTGTTGGTCCCCTTCCTGTACAGGGCGTTTAAGAGCTAAGCTGACACCGTGGAAGCTATAACA
TM2p	A2	Targeting	AMFR_+_56459532.23-P1P2	CTTAAGGTTTGCCCATTCCCCCACCTTGTTGGAGGCGGCGGCGCGACCGCTGTTTAAGAGCTAAGCTGACACCGTGGAAGCTATAACA
TM2p	A2	Targeting	AMFR_+_56459545.23-P1P2	CTTAAGGTTTGCCCATTCCCCCACCTTGTTGGGGCTACGCCCGCTAGGCGGGTTTAAGAGCTAAGCTGACACCGTGGAAGCTATAACA
TM2p	A2	Targeting	AMFR_+_56459551.23-P1P2	CTTAAGGTTTGCCCATTCCCCCACCTTGTTGGGCCCGGGGCTACGCCCGCTGTTTAAGAGCTAAGCTGACACCGTGGAAGCTATAACA
TM2p	A2	Targeting	AMFR_+_56459579.23-P1P2	CTTAAGGTTTGCCCATTCCCCCACCTTGTTGGATGCTGGGTGCCCGCCCCCGTTTAAGAGCTAAGCTGACACCGTGGAAGCTATAACA
TM2p	A2	Targeting	AMFR_+_56459604.23-P1P2	CTTAAGGTTTGCCCATTCCCCCACCTTGTTGGCAAGCCGTGGTGCGGACGGGTTTAAGAGCTAAGCTGACACCGTGGAAGCTATAACA
TM2p	A2	Targeting	AMFR_+_56459616.23-P1P2	CTTAAGGTTTGCCCATTCCCCCACCTTGTTGGTGCGGGCCCAGCCAAGCCGGTTTAAGAGCTAAGCTGACACCGTGGAAGCTATAACA
TM2p	A2	Targeting	AMFR_-_56459486.23-P1P2	CTTAAGGTTTGCCCATTCCCCCACCTTGTTGGGACAGGCCGCCGCCCCCAGGTTTAAGAGCTAAGCTGACACCGTGGAAGCTATAACA
TM2p	A2	Targeting	AMFR_-_56459558.23-P1P2	CTTAAGGTTTGCCCATTCCCCCACCTTGTTGGCGGTCGCGCCGCCGCCTAGGTTTAAGAGCTAAGCTGACACCGTGGAAGCTATAACA
TM2p	A2	Targeting	AMFR_-_56459571.23-P1P2	CTTAAGGTTTGCCCATTCCCCCACCTTGTTGGGCCTAGCGGGCGTAGCCCCGTTTAAGAGCTAAGCTGACACCGTGGAAGCTATAACA
TM2p	A2	Targeting	AMFR_-_56459647.23-P1P2	CTTAAGGTTTGCCCATTCCCCCACCTTGTTGGGCTGGGCCCGCAGACACAGGTTTAAGAGCTAAGCTGACACCGTGGAAGCTATAACA
TM2p	A2	Targeting	ANO10_+_43663697.23-P1P2	CTTAAGGTTTGCCCATTCCCCCACCTTGTTGGAGGGCTGCCTTTTTTTCTTGTTTAAGAGCTAAGCTGACACCGTGGAAGCTATAACA
TM2p	A2	Targeting	ANO10_+_43663715.23-P1P2	CTTAAGGTTTGCCCATTCCCCCACCTTGTTGGCCAGGCGACAGCCCAATGAGTTTAAGAGCTAAGCTGACACCGTGGAAGCTATAACA
TM2p	A2	Targeting	ANO10_-_43663557.23-P1P2	CTTAAGGTTTGCCCATTCCCCCACCTTGTTGGACGCGGCGGGGCCTAGATGGTTTAAGAGCTAAGCTGACACCGTGGAAGCTATAACA
TM2p	A2	Targeting	ANO10_-_43663570.23-P1P2	CTTAAGGTTTGCCCATTCCCCCACCTTGTTGGTAGATGCGGTCACACGCAGGTTTAAGAGCTAAGCTGACACCGTGGAAGCTATAACA
TM2p	A2	Targeting	ANO10_-_43663610.23-P1P2	CTTAAGGTTTGCCCATTCCCCCACCTTGTTGGGAGGCGGGGCCTCACTGGGGTTTAAGAGCTAAGCTGACACCGTGGAAGCTATAACA
TM2p	A2	Targeting	ANO10_-_43663625.23-P1P2	CTTAAGGTTTGCCCATTCCCCCACCTTGTTGGTGGGCGGTAGCTCCGGGAGGTTTAAGAGCTAAGCTGACACCGTGGAAGCTATAACA
TM2p	A2	Targeting	ANO10_-_43663636.23-P1P2	CTTAAGGTTTGCCCATTCCCCCACCTTGTTGGTCCGGGAGGGGCGGAACTGGTTTAAGAGCTAAGCTGACACCGTGGAAGCTATAACA
TM2p	A2	Targeting	ANO10_-_43663672.23-P1P2	CTTAAGGTTTGCCCATTCCCCCACCTTGTTGGCCTCACTGGGCGATCGTAGGTTTAAGAGCTAAGCTGACACCGTGGAAGCTATAACA
TM2p	A2	Targeting	ANO10_-_43663750.23-P1P2	CTTAAGGTTTGCCCATTCCCCCACCTTGTTGGTCGCCTGGAACAGGAGACCGTTTAAGAGCTAAGCTGACACCGTGGAAGCTATAACA
TM2p	A2	Targeting	ANO10_-_43663763.23-P1P2	CTTAAGGTTTGCCCATTCCCCCACCTTGTTGGGAGACCAGGCCGGGAGAAAGTTTAAGAGCTAAGCTGACACCGTGGAAGCTATAACA
TM2p	A2	Targeting	ANO3_+_26353501.23-P1P2	CTTAAGGTTTGCCCATTCCCCCACCTTGTTGGTGGGAGCAGAAGACTTTACGTTTAAGAGCTAAGCTGACACCGTGGAAGCTATAACA
TM2p	A2	Targeting	ANO3_+_26353525.23-P1P2	CTTAAGGTTTGCCCATTCCCCCACCTTGTTGGGCGTTGAGCGGGGTTGGCTGTTTAAGAGCTAAGCTGACACCGTGGAAGCTATAACA
TM2p	A2	Targeting	ANO3_+_26353530.23-P1P2	CTTAAGGTTTGCCCATTCCCCCACCTTGTTGGGGTGGGCGTTGAGCGGGGTGTTTAAGAGCTAAGCTGACACCGTGGAAGCTATAACA
TM2p	A2	Targeting	ANO3_+_26353534.23-P1P2	CTTAAGGTTTGCCCATTCCCCCACCTTGTTGGGAGGGGTGGGCGTTGAGCGGTTTAAGAGCTAAGCTGACACCGTGGAAGCTATAACA
TM2p	A2	Targeting	ANO3_+_26353551.23-P1P2	CTTAAGGTTTGCCCATTCCCCCACCTTGTTGGGCGTCCAGTGCCACAGTGAGTTTAAGAGCTAAGCTGACACCGTGGAAGCTATAACA
TM2p	A2	Targeting	ANO3_+_26353593.23-P1P2	CTTAAGGTTTGCCCATTCCCCCACCTTGTTGGTCCCCTTAGCGGCTACTCTGTTTAAGAGCTAAGCTGACACCGTGGAAGCTATAACA
TM2p	A2	Targeting	ANO3_+_26353603.23-P1P2	CTTAAGGTTTGCCCATTCCCCCACCTTGTTGGAGCGTCCGGCTCCCCTTAGGTTTAAGAGCTAAGCTGACACCGTGGAAGCTATAACA
TM2p	A2	Targeting	ANO3_+_26353616.23-P1P2	CTTAAGGTTTGCCCATTCCCCCACCTTGTTGGGGGAGGGCGGTCTAGCGTCGTTTAAGAGCTAAGCTGACACCGTGGAAGCTATAACA
TM2p	A2	Targeting	ANO3_+_26353643.23-P1P2	CTTAAGGTTTGCCCATTCCCCCACCTTGTTGGCCGCCGGTGTCGTTGTCATGTTTAAGAGCTAAGCTGACACCGTGGAAGCTATAACA
TM2p	A2	Targeting	ANO3_-_26353587.23-P1P2	CTTAAGGTTTGCCCATTCCCCCACCTTGTTGGTGGACGCGCGGGGGATGCGGTTTAAGAGCTAAGCTGACACCGTGGAAGCTATAACA
TM2p	A2	Targeting	ANO4_+_101188329.23-P1P2	CTTAAGGTTTGCCCATTCCCCCACCTTGTTGGCGACCAATCAGCCCAGCCAGTTTAAGAGCTAAGCTGACACCGTGGAAGCTATAACA
TM2p	A2	Targeting	ANO4_+_101188445.23-P1P2	CTTAAGGTTTGCCCATTCCCCCACCTTGTTGGGGAGGGTGGGCACTAGGCTGTTTAAGAGCTAAGCTGACACCGTGGAAGCTATAACA
TM2p	A2	Targeting	ANO4_+_101188465.23-P1P2	CTTAAGGTTTGCCCATTCCCCCACCTTGTTGGGCAGGGGAGGCATGGTCGGGTTTAAGAGCTAAGCTGACACCGTGGAAGCTATAACA
TM2p	A2	Targeting	ANO4_+_101188477.23-P1P2	CTTAAGGTTTGCCCATTCCCCCACCTTGTTGGCCCTCCCCAGGTGCAGGGGGTTTAAGAGCTAAGCTGACACCGTGGAAGCTATAACA
TM2p	A2	Targeting	ANO4_+_101188510.23-P1P2	CTTAAGGTTTGCCCATTCCCCCACCTTGTTGGGTCTCAGAGCATCACGCCCGTTTAAGAGCTAAGCTGACACCGTGGAAGCTATAACA
TM2p	A2	Targeting	ANO4_+_101188574.23-P1P2	CTTAAGGTTTGCCCATTCCCCCACCTTGTTGGAGTCTGGAACAGGACTCTCGTTTAAGAGCTAAGCTGACACCGTGGAAGCTATAACA
TM2p	A2	Targeting	ANO4_-_101188291.23-P1P2	CTTAAGGTTTGCCCATTCCCCCACCTTGTTGGGTCCTGCCGCTCTCAGAACGTTTAAGAGCTAAGCTGACACCGTGGAAGCTATAACA
TM2p	A2	Targeting	ANO4_-_101188334.23-P1P2	CTTAAGGTTTGCCCATTCCCCCACCTTGTTGGTCACACTGACACGGCCCCCGTTTAAGAGCTAAGCTGACACCGTGGAAGCTATAACA
TM2p	A2	Targeting	ANO4_-_101188515.23-P1P2	CTTAAGGTTTGCCCATTCCCCCACCTTGTTGGGAGGGGGAGGACCAGTCCTGTTTAAGAGCTAAGCTGACACCGTGGAAGCTATAACA
TM2p	A2	Targeting	ANO4_-_101188536.23-P1P2	CTTAAGGTTTGCCCATTCCCCCACCTTGTTGGGCGTGATGCTCTGAGACGGGTTTAAGAGCTAAGCTGACACCGTGGAAGCTATAACA
TM2p	A2	Targeting	ANO5_+_22214361.23-P1P2	CTTAAGGTTTGCCCATTCCCCCACCTTGTTGGGCCCCCCGGCCCTGTTGGCGTTTAAGAGCTAAGCTGACACCGTGGAAGCTATAACA
TM2p	A2	Targeting	ANO5_+_22214526.23-P1P2	CTTAAGGTTTGCCCATTCCCCCACCTTGTTGGCCGGCCGGCGCCCCACCCTGTTTAAGAGCTAAGCTGACACCGTGGAAGCTATAACA
TM2p	A2	Targeting	ANO5_-_22214330.23-P1P2	CTTAAGGTTTGCCCATTCCCCCACCTTGTTGGTGGGTGGACCCAGTGGAAAGTTTAAGAGCTAAGCTGACACCGTGGAAGCTATAACA
TM2p	A2	Targeting	ANO5_-_22214420.23-P1P2	CTTAAGGTTTGCCCATTCCCCCACCTTGTTGGGGACGGGAGGCTGCATGTCGTTTAAGAGCTAAGCTGACACCGTGGAAGCTATAACA
TM2p	A2	Targeting	ANO5_-_22214423.23-P1P2	CTTAAGGTTTGCCCATTCCCCCACCTTGTTGGCGGGAGGCTGCATGTCCGGGTTTAAGAGCTAAGCTGACACCGTGGAAGCTATAACA
TM2p	A2	Targeting	ANO5_-_22214469.23-P1P2	CTTAAGGTTTGCCCATTCCCCCACCTTGTTGGGACCTGGGGACGGCTTGAGGTTTAAGAGCTAAGCTGACACCGTGGAAGCTATAACA
TM2p	A2	Targeting	ANO5_-_22214477.23-P1P2	CTTAAGGTTTGCCCATTCCCCCACCTTGTTGGGACGGCTTGAGCGGAGAGGGTTTAAGAGCTAAGCTGACACCGTGGAAGCTATAACA
TM2p	A2	Targeting	ANO5_-_22214532.23-P1P2	CTTAAGGTTTGCCCATTCCCCCACCTTGTTGGGGGAGATGGCGGTCTCCGAGTTTAAGAGCTAAGCTGACACCGTGGAAGCTATAACA
TM2p	A2	Targeting	ANO5_-_22214587.23-P1P2	CTTAAGGTTTGCCCATTCCCCCACCTTGTTGGGGGAAAGAGGCGTGGAAACGTTTAAGAGCTAAGCTGACACCGTGGAAGCTATAACA
TM2p	A2	Targeting	ANO5_-_22214701.23-P1P2	CTTAAGGTTTGCCCATTCCCCCACCTTGTTGGGCCGAGCAGGCACAGGGACGTTTAAGAGCTAAGCTGACACCGTGGAAGCTATAACA
TM2p	A2	Targeting	ANO7_+_242157089.23-P1P2	CTTAAGGTTTGCCCATTCCCCCACCTTGTTGGGAACTGCAGCACTGCGGGGGTTTAAGAGCTAAGCTGACACCGTGGAAGCTATAACA
TM2p	A2	Targeting	ANO7_+_242157133.23-P1P2	CTTAAGGTTTGCCCATTCCCCCACCTTGTTGGAGCGGCGCGAGCGGACAGGGTTTAAGAGCTAAGCTGACACCGTGGAAGCTATAACA
TM2p	A2	Targeting	ANO7_+_242157136.23-P1P2	CTTAAGGTTTGCCCATTCCCCCACCTTGTTGGAAGAGCGGCGCGAGCGGACGTTTAAGAGCTAAGCTGACACCGTGGAAGCTATAACA
TM2p	A2	Targeting	ANO7_+_242157241.23-P1P2	CTTAAGGTTTGCCCATTCCCCCACCTTGTTGGAACCAGATGCCGATGTCCTGTTTAAGAGCTAAGCTGACACCGTGGAAGCTATAACA
TM2p	A2	Targeting	ANO7_+_242157638.23-P1P2	CTTAAGGTTTGCCCATTCCCCCACCTTGTTGGGGAAGGCCTGGGCGCCGGAGTTTAAGAGCTAAGCTGACACCGTGGAAGCTATAACA
TM2p	A2	Targeting	ANO7_+_242157661.23-P1P2	CTTAAGGTTTGCCCATTCCCCCACCTTGTTGGGAAGTCGGACGAGAAGGCCGTTTAAGAGCTAAGCTGACACCGTGGAAGCTATAACA
TM2p	A2	Targeting	ANO7_-_242157177.23-P1P2	CTTAAGGTTTGCCCATTCCCCCACCTTGTTGGTTCGCCCTGCTCAACAACTGTTTAAGAGCTAAGCTGACACCGTGGAAGCTATAACA
TM2p	A2	Targeting	ANO7_-_242157320.23-P1P2	CTTAAGGTTTGCCCATTCCCCCACCTTGTTGGCAGCAACGTGAGGCCCGGGGTTTAAGAGCTAAGCTGACACCGTGGAAGCTATAACA
TM2p	A2	Targeting	ANO7_-_242157445.23-P1P2	CTTAAGGTTTGCCCATTCCCCCACCTTGTTGGGGGGCATCGGGGGCTCGTAGTTTAAGAGCTAAGCTGACACCGTGGAAGCTATAACA
TM2p	A2	Targeting	ANO7_-_242157645.23-P1P2	CTTAAGGTTTGCCCATTCCCCCACCTTGTTGGCGCCTCGCGCTGACCCCTCGTTTAAGAGCTAAGCTGACACCGTGGAAGCTATAACA
TM2p	A2	Targeting	ANO8_+_17445620.23-P1P2	CTTAAGGTTTGCCCATTCCCCCACCTTGTTGGGGGACGAGAAGCAGCGCTCGTTTAAGAGCTAAGCTGACACCGTGGAAGCTATAACA
TM2p	A2	Targeting	ANO8_+_17445644.23-P1P2	CTTAAGGTTTGCCCATTCCCCCACCTTGTTGGGAGAATCGAGGTTCGGCTCGTTTAAGAGCTAAGCTGACACCGTGGAAGCTATAACA
TM2p	A2	Targeting	ANO8_+_17445650.23-P1P2	CTTAAGGTTTGCCCATTCCCCCACCTTGTTGGGGGAAGGAGAATCGAGGTTGTTTAAGAGCTAAGCTGACACCGTGGAAGCTATAACA
TM2p	A2	Targeting	ANO8_+_17445655.23-P1P2	CTTAAGGTTTGCCCATTCCCCCACCTTGTTGGGGGCCGGGAAGGAGAATCGGTTTAAGAGCTAAGCTGACACCGTGGAAGCTATAACA
TM2p	A2	Targeting	ANO8_+_17445665.23-P1P2	CTTAAGGTTTGCCCATTCCCCCACCTTGTTGGGACGTGCATCGGGCCGGGAGTTTAAGAGCTAAGCTGACACCGTGGAAGCTATAACA
TM2p	A2	Targeting	ANO8_+_17445712.23-P1P2	CTTAAGGTTTGCCCATTCCCCCACCTTGTTGGGCGAACCAAAGAACTAGGCGTTTAAGAGCTAAGCTGACACCGTGGAAGCTATAACA
TM2p	A2	Targeting	ANO8_+_17445716.23-P1P2	CTTAAGGTTTGCCCATTCCCCCACCTTGTTGGAGACGCGAACCAAAGAACTGTTTAAGAGCTAAGCTGACACCGTGGAAGCTATAACA
TM2p	A2	Targeting	ANO8_+_17445774.23-P1P2	CTTAAGGTTTGCCCATTCCCCCACCTTGTTGGCAGCAGCAGGGAGCGAGGTGTTTAAGAGCTAAGCTGACACCGTGGAAGCTATAACA
TM2p	A2	Targeting	ANO8_+_17446002.23-P1P2	CTTAAGGTTTGCCCATTCCCCCACCTTGTTGGTATCACAGCCCTACTGGGGGTTTAAGAGCTAAGCTGACACCGTGGAAGCTATAACA
TM2p	A2	Targeting	ANO8_-_17445695.23-P1P2	CTTAAGGTTTGCCCATTCCCCCACCTTGTTGGCCCGATGCACGTCACTCTAGTTTAAGAGCTAAGCTGACACCGTGGAAGCTATAACA
TM2p	A2	Targeting	APH1A_+_150241540.23-P1P2	CTTAAGGTTTGCCCATTCCCCCACCTTGTTGGCACTCCCAGGACGAAGTCAGTTTAAGAGCTAAGCTGACACCGTGGAAGCTATAACA
TM2p	A2	Targeting	APH1A_+_150241552.23-P1P2	CTTAAGGTTTGCCCATTCCCCCACCTTGTTGGACCGGCTCGAGCCACTCCCGTTTAAGAGCTAAGCTGACACCGTGGAAGCTATAACA
TM2p	A2	Targeting	APH1A_+_150241569.23-P1P2	CTTAAGGTTTGCCCATTCCCCCACCTTGTTGGCCGGCCCACCCCCATTAACGTTTAAGAGCTAAGCTGACACCGTGGAAGCTATAACA
TM2p	A2	Targeting	APH1A_-_150241482.23-P1P2	CTTAAGGTTTGCCCATTCCCCCACCTTGTTGGCCCACCCCCGGAAGGCCAAGTTTAAGAGCTAAGCTGACACCGTGGAAGCTATAACA
TM2p	A2	Targeting	APH1A_-_150241496.23-P1P2	CTTAAGGTTTGCCCATTCCCCCACCTTGTTGGGCCAATGGAGAATCAGCGCGTTTAAGAGCTAAGCTGACACCGTGGAAGCTATAACA
TM2p	A2	Targeting	APH1A_-_150241499.23-P1P2	CTTAAGGTTTGCCCATTCCCCCACCTTGTTGGAATGGAGAATCAGCGCGGGGTTTAAGAGCTAAGCTGACACCGTGGAAGCTATAACA
TM2p	A2	Targeting	APH1A_-_150241518.23-P1P2	CTTAAGGTTTGCCCATTCCCCCACCTTGTTGGCGGAGCTGCTCGACCTGCTGTTTAAGAGCTAAGCTGACACCGTGGAAGCTATAACA
TM2p	A2	Targeting	APH1A_-_150241557.23-P1P2	CTTAAGGTTTGCCCATTCCCCCACCTTGTTGGGAGGCCTTGACTTCGTCCTGTTTAAGAGCTAAGCTGACACCGTGGAAGCTATAACA
TM2p	A2	Targeting	APH1A_-_150241579.23-P1P2	CTTAAGGTTTGCCCATTCCCCCACCTTGTTGGAGTGGCTCGAGCCGGTTAAGTTTAAGAGCTAAGCTGACACCGTGGAAGCTATAACA
TM2p	A2	Targeting	APH1A_-_150241582.23-P1P2	CTTAAGGTTTGCCCATTCCCCCACCTTGTTGGGGCTCGAGCCGGTTAATGGGTTTAAGAGCTAAGCTGACACCGTGGAAGCTATAACA
TM2p	A2	Targeting	APH1B_+_63569419.23-P1P2	CTTAAGGTTTGCCCATTCCCCCACCTTGTTGGCTCCCGAGGCGGGCGTCCTGTTTAAGAGCTAAGCTGACACCGTGGAAGCTATAACA
TM2p	A2	Targeting	APH1B_+_63569458.23-P1P2	CTTAAGGTTTGCCCATTCCCCCACCTTGTTGGCGGGTGTCCGGAAGCGCCAGTTTAAGAGCTAAGCTGACACCGTGGAAGCTATAACA
TM2p	A2	Targeting	APH1B_+_63569516.23-P1P2	CTTAAGGTTTGCCCATTCCCCCACCTTGTTGGCGCAGGGGCGGGCTCAAGGGTTTAAGAGCTAAGCTGACACCGTGGAAGCTATAACA
TM2p	A2	Targeting	APH1B_+_63569577.23-P1P2	CTTAAGGTTTGCCCATTCCCCCACCTTGTTGGGGCGTGGGGGTAAACGCTAGTTTAAGAGCTAAGCTGACACCGTGGAAGCTATAACA
TM2p	A2	Targeting	APH1B_+_63569609.23-P1P2	CTTAAGGTTTGCCCATTCCCCCACCTTGTTGGAGGCGGGGTACGTGGGTCGGTTTAAGAGCTAAGCTGACACCGTGGAAGCTATAACA
TM2p	A2	Targeting	APH1B_+_63569675.23-P1P2	CTTAAGGTTTGCCCATTCCCCCACCTTGTTGGTGGGCAGGCACGGGGACGGGTTTAAGAGCTAAGCTGACACCGTGGAAGCTATAACA
TM2p	A2	Targeting	APH1B_+_63569689.23-P1P2	CTTAAGGTTTGCCCATTCCCCCACCTTGTTGGCGGGGCGCGGCTCATGGGCGTTTAAGAGCTAAGCTGACACCGTGGAAGCTATAACA
TM2p	A2	Targeting	APH1B_+_63569693.23-P1P2	CTTAAGGTTTGCCCATTCCCCCACCTTGTTGGGGGGCGGGGCGCGGCTCATGTTTAAGAGCTAAGCTGACACCGTGGAAGCTATAACA
TM2p	A2	Targeting	APH1B_-_63569485.23-P1P2	CTTAAGGTTTGCCCATTCCCCCACCTTGTTGGCGCTTCCGGACACCCGGTAGTTTAAGAGCTAAGCTGACACCGTGGAAGCTATAACA
TM2p	A2	Targeting	APH1B_-_63569503.23-P1P2	CTTAAGGTTTGCCCATTCCCCCACCTTGTTGGAGGGCGGAGGGCCCAACGGGTTTAAGAGCTAAGCTGACACCGTGGAAGCTATAACA
TM2p	A2	Targeting	APLNR_+_57004706.23-P1P2	CTTAAGGTTTGCCCATTCCCCCACCTTGTTGGAAGTGTCTTAACTGAGACGGTTTAAGAGCTAAGCTGACACCGTGGAAGCTATAACA
TM2p	A2	Targeting	APLNR_+_57004754.23-P1P2	CTTAAGGTTTGCCCATTCCCCCACCTTGTTGGAGGGAGTGACGAGTCAAGGGTTTAAGAGCTAAGCTGACACCGTGGAAGCTATAACA
TM2p	A2	Targeting	APLNR_+_57004791.23-P1P2	CTTAAGGTTTGCCCATTCCCCCACCTTGTTGGTGACTCACAAGAGAGGGGCGTTTAAGAGCTAAGCTGACACCGTGGAAGCTATAACA
TM2p	A2	Targeting	APLNR_+_57004866.23-P1P2	CTTAAGGTTTGCCCATTCCCCCACCTTGTTGGAGCACAGTAGGGGTCAATTGTTTAAGAGCTAAGCTGACACCGTGGAAGCTATAACA
TM2p	A2	Targeting	APLNR_+_57004875.23-P1P2	CTTAAGGTTTGCCCATTCCCCCACCTTGTTGGGTTCAGCCCAGCACAGTAGGTTTAAGAGCTAAGCTGACACCGTGGAAGCTATAACA
TM2p	A2	Targeting	APLNR_+_57005009.23-P1P2	CTTAAGGTTTGCCCATTCCCCCACCTTGTTGGAGGGAGTGCCCTAAAGGGCGTTTAAGAGCTAAGCTGACACCGTGGAAGCTATAACA
TM2p	A2	Targeting	APLNR_+_57005013.23-P1P2	CTTAAGGTTTGCCCATTCCCCCACCTTGTTGGGAGGAGGGAGTGCCCTAAAGTTTAAGAGCTAAGCTGACACCGTGGAAGCTATAACA
TM2p	A2	Targeting	APLNR_+_57005050.23-P1P2	CTTAAGGTTTGCCCATTCCCCCACCTTGTTGGGATGGAAGGGGGTGAGAACGTTTAAGAGCTAAGCTGACACCGTGGAAGCTATAACA
TM2p	A2	Targeting	APLNR_-_57004907.23-P1P2	CTTAAGGTTTGCCCATTCCCCCACCTTGTTGGCTGGGCTGAACATTATCTGGTTTAAGAGCTAAGCTGACACCGTGGAAGCTATAACA
TM2p	A2	Targeting	APLNR_-_57004948.23-P1P2	CTTAAGGTTTGCCCATTCCCCCACCTTGTTGGTGGCCCCGCCTCTCCTTTCGTTTAAGAGCTAAGCTGACACCGTGGAAGCTATAACA
TM2p	A2	Targeting	APOL1_+_36648798.23-P1P2	CTTAAGGTTTGCCCATTCCCCCACCTTGTTGGGTCTCCCACACATGCCTTGGTTTAAGAGCTAAGCTGACACCGTGGAAGCTATAACA
TM2p	A2	Targeting	APOL1_+_36648830.23-P1P2	CTTAAGGTTTGCCCATTCCCCCACCTTGTTGGTTACTCCTGCCCGTGCCATGTTTAAGAGCTAAGCTGACACCGTGGAAGCTATAACA
TM2p	A2	Targeting	APOL1_-_36648702.23-P1P2	CTTAAGGTTTGCCCATTCCCCCACCTTGTTGGCTGCTGTGCGCGATGACTGGTTTAAGAGCTAAGCTGACACCGTGGAAGCTATAACA
TM2p	A2	Targeting	APOL1_-_36648814.23-P1P2	CTTAAGGTTTGCCCATTCCCCCACCTTGTTGGAGCATCCACAAGGCATGTGGTTTAAGAGCTAAGCTGACACCGTGGAAGCTATAACA
TM2p	A2	Targeting	APOL1_-_36648891.23-P1P2	CTTAAGGTTTGCCCATTCCCCCACCTTGTTGGGTGGATGCACGGGAGGATGGTTTAAGAGCTAAGCTGACACCGTGGAAGCTATAACA
TM2p	A2	Targeting	APOL1_-_36648904.23-P1P2	CTTAAGGTTTGCCCATTCCCCCACCTTGTTGGAGGATGGGGAGTAATCTGCGTTTAAGAGCTAAGCTGACACCGTGGAAGCTATAACA
TM2p	A2	Targeting	APOL1_-_36648980.23-P1P2	CTTAAGGTTTGCCCATTCCCCCACCTTGTTGGAGCCCTGAGGATGCGAGGCGTTTAAGAGCTAAGCTGACACCGTGGAAGCTATAACA
TM2p	A2	Targeting	APOL1_-_36649011.23-P1P2	CTTAAGGTTTGCCCATTCCCCCACCTTGTTGGTGAGAGGGATCTGGATGTCGTTTAAGAGCTAAGCTGACACCGTGGAAGCTATAACA
TM2p	A2	Targeting	APOL1_-_36649032.23-P1P2	CTTAAGGTTTGCCCATTCCCCCACCTTGTTGGGTCTCAGGCTGCTCCTCTAGTTTAAGAGCTAAGCTGACACCGTGGAAGCTATAACA
TM2p	A2	Targeting	APOL1_-_36649072.23-P1P2	CTTAAGGTTTGCCCATTCCCCCACCTTGTTGGGGGCTGGACTGAAGGTGGAGTTTAAGAGCTAAGCTGACACCGTGGAAGCTATAACA
TM2p	A2	Targeting	APOL2_+_36635596.23-P1P2	CTTAAGGTTTGCCCATTCCCCCACCTTGTTGGTCGAATTCCAGGGTATATCGTTTAAGAGCTAAGCTGACACCGTGGAAGCTATAACA
TM2p	A2	Targeting	APOL2_+_36635738.23-P1P2	CTTAAGGTTTGCCCATTCCCCCACCTTGTTGGGACCCGGATGTCTGGTCTGGTTTAAGAGCTAAGCTGACACCGTGGAAGCTATAACA
TM2p	A2	Targeting	APOL2_+_36635745.23-P1P2	CTTAAGGTTTGCCCATTCCCCCACCTTGTTGGTGAGAGGGACCCGGATGTCGTTTAAGAGCTAAGCTGACACCGTGGAAGCTATAACA
TM2p	A2	Targeting	APOL2_+_36635788.23-P1P2	CTTAAGGTTTGCCCATTCCCCCACCTTGTTGGCAGCAGACCTTGAATCCTGGTTTAAGAGCTAAGCTGACACCGTGGAAGCTATAACA
TM2p	A2	Targeting	APOL2_+_36635841.23-P1P2	CTTAAGGTTTGCCCATTCCCCCACCTTGTTGGAACTCCCCAGGCTCAACTCGTTTAAGAGCTAAGCTGACACCGTGGAAGCTATAACA
TM2p	A2	Targeting	APOL2_+_36635870.23-P1P2	CTTAAGGTTTGCCCATTCCCCCACCTTGTTGGGGGGGCAAGCGGCTCAGATGTTTAAGAGCTAAGCTGACACCGTGGAAGCTATAACA
TM2p	A2	Targeting	APOL2_+_36635896.23-P1P2	CTTAAGGTTTGCCCATTCCCCCACCTTGTTGGAACTGCAGAGATCGGGGCGGTTTAAGAGCTAAGCTGACACCGTGGAAGCTATAACA
TM2p	A2	Targeting	APOL2_-_36635756.23-P1P2	CTTAAGGTTTGCCCATTCCCCCACCTTGTTGGCAGCCGCAGACCAGACATCGTTTAAGAGCTAAGCTGACACCGTGGAAGCTATAACA
TM2p	A2	Targeting	APOL2_-_36635802.23-P1P2	CTTAAGGTTTGCCCATTCCCCCACCTTGTTGGCTCACATCCTCAGGATTCAGTTTAAGAGCTAAGCTGACACCGTGGAAGCTATAACA
TM2p	A2	Targeting	APOL2_-_36635831.23-P1P2	CTTAAGGTTTGCCCATTCCCCCACCTTGTTGGTGTCAGCTGCCCATGTCTCGTTTAAGAGCTAAGCTGACACCGTGGAAGCTATAACA
TM2p	A2	Targeting	APOL6_+_36044227.23-P1P2	CTTAAGGTTTGCCCATTCCCCCACCTTGTTGGAGCCCATGAGCAAGCGATGGTTTAAGAGCTAAGCTGACACCGTGGAAGCTATAACA
TM2p	A2	Targeting	APOL6_+_36044340.23-P1P2	CTTAAGGTTTGCCCATTCCCCCACCTTGTTGGGAGCAGAATCCAAGTCAGGGTTTAAGAGCTAAGCTGACACCGTGGAAGCTATAACA
TM2p	A2	Targeting	APOL6_+_36044343.23-P1P2	CTTAAGGTTTGCCCATTCCCCCACCTTGTTGGAAAGAGCAGAATCCAAGTCGTTTAAGAGCTAAGCTGACACCGTGGAAGCTATAACA
TM2p	A2	Targeting	APOL6_+_36044370.23-P1P2	CTTAAGGTTTGCCCATTCCCCCACCTTGTTGGTTCTCTAATTGGATGAACAGTTTAAGAGCTAAGCTGACACCGTGGAAGCTATAACA
TM2p	A2	Targeting	APOL6_+_36044427.23-P1P2	CTTAAGGTTTGCCCATTCCCCCACCTTGTTGGGGCTCTTCCAGGAAATCATGTTTAAGAGCTAAGCTGACACCGTGGAAGCTATAACA
TM2p	A2	Targeting	APOL6_+_36044437.23-P1P2	CTTAAGGTTTGCCCATTCCCCCACCTTGTTGGAAAGCTCTAGGGCTCTTCCGTTTAAGAGCTAAGCTGACACCGTGGAAGCTATAACA
TM2p	A2	Targeting	APOL6_+_36044533.23-P1P2	CTTAAGGTTTGCCCATTCCCCCACCTTGTTGGGGGCTGGAGAAAGACGGATGTTTAAGAGCTAAGCTGACACCGTGGAAGCTATAACA
TM2p	A2	Targeting	APOL6_-_36044246.23-P1P2	CTTAAGGTTTGCCCATTCCCCCACCTTGTTGGCGCCCCATCGCTTGCTCATGTTTAAGAGCTAAGCTGACACCGTGGAAGCTATAACA
TM2p	A2	Targeting	APOL6_-_36044339.23-P1P2	CTTAAGGTTTGCCCATTCCCCCACCTTGTTGGGGACAGAGACGAGAGACTCGTTTAAGAGCTAAGCTGACACCGTGGAAGCTATAACA
TM2p	A2	Targeting	APOL6_-_36044424.23-P1P2	CTTAAGGTTTGCCCATTCCCCCACCTTGTTGGGGAAACTGAAAGTGACAGCGTTTAAGAGCTAAGCTGACACCGTGGAAGCTATAACA
TM2p	A2	Targeting	APOLD1_+_12938378.23-P1P2	CTTAAGGTTTGCCCATTCCCCCACCTTGTTGGTTCGCTTTCCCCTGAACGCGTTTAAGAGCTAAGCTGACACCGTGGAAGCTATAACA
TM2p	A2	Targeting	APOLD1_+_12938416.23-P1P2	CTTAAGGTTTGCCCATTCCCCCACCTTGTTGGCACAGCACATCCCGTATTTGTTTAAGAGCTAAGCTGACACCGTGGAAGCTATAACA
TM2p	A2	Targeting	APOLD1_+_12938453.23-P1P2	CTTAAGGTTTGCCCATTCCCCCACCTTGTTGGCTAGAAGGACGTGACATGGGTTTAAGAGCTAAGCTGACACCGTGGAAGCTATAACA
TM2p	A2	Targeting	APOLD1_+_12938456.23-P1P2	CTTAAGGTTTGCCCATTCCCCCACCTTGTTGGCATCTAGAAGGACGTGACAGTTTAAGAGCTAAGCTGACACCGTGGAAGCTATAACA
TM2p	A2	Targeting	APOLD1_+_12938467.23-P1P2	CTTAAGGTTTGCCCATTCCCCCACCTTGTTGGCCTGCTGCCTTCATCTAGAGTTTAAGAGCTAAGCTGACACCGTGGAAGCTATAACA
TM2p	A2	Targeting	APOLD1_+_12938544.23-P1P2	CTTAAGGTTTGCCCATTCCCCCACCTTGTTGGTATAGTTCCAGAGAACCAAGTTTAAGAGCTAAGCTGACACCGTGGAAGCTATAACA
TM2p	A2	Targeting	APOLD1_-_12938179.23-P1P2	CTTAAGGTTTGCCCATTCCCCCACCTTGTTGGAGCGGCTATGTCAGATATGGTTTAAGAGCTAAGCTGACACCGTGGAAGCTATAACA
TM2p	A2	Targeting	APOLD1_-_12938273.23-P1P2	CTTAAGGTTTGCCCATTCCCCCACCTTGTTGGCAGCCTGGGGTGCGTTTGAGTTTAAGAGCTAAGCTGACACCGTGGAAGCTATAACA
TM2p	A2	Targeting	APOLD1_-_12938326.23-P1P2	CTTAAGGTTTGCCCATTCCCCCACCTTGTTGGGAAAGGCAGGGTATCCCACGTTTAAGAGCTAAGCTGACACCGTGGAAGCTATAACA
TM2p	A2	Targeting	APOLD1_-_12938391.23-P1P2	CTTAAGGTTTGCCCATTCCCCCACCTTGTTGGGTTCTCTTCCTGCGTTCAGGTTTAAGAGCTAAGCTGACACCGTGGAAGCTATAACA
TM2p	A2	Targeting	ARIH2OS_+_48956809.23-P1P2	CTTAAGGTTTGCCCATTCCCCCACCTTGTTGGAGCTGGGGATACCCTCCACGTTTAAGAGCTAAGCTGACACCGTGGAAGCTATAACA
TM2p	A2	Targeting	ARIH2OS_+_48956823.23-P1P2	CTTAAGGTTTGCCCATTCCCCCACCTTGTTGGACGCGGAGCCCGCGAGCTGGTTTAAGAGCTAAGCTGACACCGTGGAAGCTATAACA
TM2p	A2	Targeting	ARIH2OS_+_48956874.23-P1P2	CTTAAGGTTTGCCCATTCCCCCACCTTGTTGGCCGGGGCCGCACATCCCTAGTTTAAGAGCTAAGCTGACACCGTGGAAGCTATAACA
TM2p	A2	Targeting	ARIH2OS_+_48957351.23-P1P2	CTTAAGGTTTGCCCATTCCCCCACCTTGTTGGCCTAACAACCAACCATCCTGTTTAAGAGCTAAGCTGACACCGTGGAAGCTATAACA
TM2p	A2	Targeting	ARIH2OS_+_48957375.23-P1P2	CTTAAGGTTTGCCCATTCCCCCACCTTGTTGGAGCCAAAGTCACATGTTCAGTTTAAGAGCTAAGCTGACACCGTGGAAGCTATAACA
TM2p	A2	Targeting	ARIH2OS_-_48956692.23-P1P2	CTTAAGGTTTGCCCATTCCCCCACCTTGTTGGGCCTCTGACCAACCGGCGCGTTTAAGAGCTAAGCTGACACCGTGGAAGCTATAACA
TM2p	A2	Targeting	ARIH2OS_-_48957247.23-P1P2	CTTAAGGTTTGCCCATTCCCCCACCTTGTTGGGTGCCAAGTCGTTTTTCTTGTTTAAGAGCTAAGCTGACACCGTGGAAGCTATAACA
TM2p	A2	Targeting	ARIH2OS_-_48957360.23-P1P2	CTTAAGGTTTGCCCATTCCCCCACCTTGTTGGGTGGTGGGCAAGCCCAGGAGTTTAAGAGCTAAGCTGACACCGTGGAAGCTATAACA
TM2p	A2	Targeting	ARIH2OS_-_48957394.23-P1P2	CTTAAGGTTTGCCCATTCCCCCACCTTGTTGGTCCCCTGAACATGTGACTTGTTTAAGAGCTAAGCTGACACCGTGGAAGCTATAACA
TM2p	A2	Targeting	ARIH2OS_-_48957456.23-P1P2	CTTAAGGTTTGCCCATTCCCCCACCTTGTTGGGGACAAAGTTGCTGTCACCGTTTAAGAGCTAAGCTGACACCGTGGAAGCTATAACA
TM2p	A2	Targeting	ARSE_+_2882444.23-P1P2	CTTAAGGTTTGCCCATTCCCCCACCTTGTTGGTCCCCCATGCTGCGATGTGGTTTAAGAGCTAAGCTGACACCGTGGAAGCTATAACA
TM2p	A2	Targeting	ARSE_+_2882475.23-P1P2	CTTAAGGTTTGCCCATTCCCCCACCTTGTTGGGGTTTGGTAGACGTGGGCGGTTTAAGAGCTAAGCTGACACCGTGGAAGCTATAACA
TM2p	A2	Targeting	ARSE_+_2882490.23-P1P2	CTTAAGGTTTGCCCATTCCCCCACCTTGTTGGAGGAAACTGACCACTGGTTGTTTAAGAGCTAAGCTGACACCGTGGAAGCTATAACA
TM2p	A2	Targeting	ARSE_+_2882495.23-P1P2	CTTAAGGTTTGCCCATTCCCCCACCTTGTTGGACCTAAGGAAACTGACCACGTTTAAGAGCTAAGCTGACACCGTGGAAGCTATAACA
TM2p	A2	Targeting	ARSE_+_2882683.23-P1P2	CTTAAGGTTTGCCCATTCCCCCACCTTGTTGGGCACCCTGTGTAACAGCACGTTTAAGAGCTAAGCTGACACCGTGGAAGCTATAACA
TM2p	A2	Targeting	ARSE_-_2882359.23-P1P2	CTTAAGGTTTGCCCATTCCCCCACCTTGTTGGGGCAGAGAGCACTTGCACAGTTTAAGAGCTAAGCTGACACCGTGGAAGCTATAACA
TM2p	A2	Targeting	ARSE_-_2882462.23-P1P2	CTTAAGGTTTGCCCATTCCCCCACCTTGTTGGTCCCCCCACATCGCAGCATGTTTAAGAGCTAAGCTGACACCGTGGAAGCTATAACA
TM2p	A2	Targeting	ARSE_-_2882501.23-P1P2	CTTAAGGTTTGCCCATTCCCCCACCTTGTTGGCCCACGTCTACCAAACCAGGTTTAAGAGCTAAGCTGACACCGTGGAAGCTATAACA
TM2p	A2	Targeting	ARSE_-_2882700.23-P1P2	CTTAAGGTTTGCCCATTCCCCCACCTTGTTGGATTGCCTGTGCTGTTACACGTTTAAGAGCTAAGCTGACACCGTGGAAGCTATAACA
TM2p	A2	Targeting	ARSE_-_2882733.23-P1P2	CTTAAGGTTTGCCCATTCCCCCACCTTGTTGGAATATGATCATATCCAACCGTTTAAGAGCTAAGCTGACACCGTGGAAGCTATAACA
TM2p	A2	Targeting	ARSF_+_2984370.23-P1P2	CTTAAGGTTTGCCCATTCCCCCACCTTGTTGGCAAAGTGTGGGGTATAATTGTTTAAGAGCTAAGCTGACACCGTGGAAGCTATAACA
TM2p	A2	Targeting	ARSF_+_2984601.23-P1P2	CTTAAGGTTTGCCCATTCCCCCACCTTGTTGGGACGCTGAATGTTCTTATCGTTTAAGAGCTAAGCTGACACCGTGGAAGCTATAACA
TM2p	A2	Targeting	ARSF_+_2984692.23-P1P2	CTTAAGGTTTGCCCATTCCCCCACCTTGTTGGCAACTCCTACTACACACCCGTTTAAGAGCTAAGCTGACACCGTGGAAGCTATAACA
TM2p	A2	Targeting	ARSF_+_2984772.23-P1P2	CTTAAGGTTTGCCCATTCCCCCACCTTGTTGGACCTCTCTCTCCCATGGGAGTTTAAGAGCTAAGCTGACACCGTGGAAGCTATAACA
TM2p	A2	Targeting	ARSF_-_2984538.23-P1P2	CTTAAGGTTTGCCCATTCCCCCACCTTGTTGGAACACAAGGGACATCAAATGTTTAAGAGCTAAGCTGACACCGTGGAAGCTATAACA
TM2p	A2	Targeting	ARSF_-_2984640.23-P1P2	CTTAAGGTTTGCCCATTCCCCCACCTTGTTGGCGTCAGCAAGAAAGGCTGTGTTTAAGAGCTAAGCTGACACCGTGGAAGCTATAACA
TM2p	A2	Targeting	ARSF_-_2984647.23-P1P2	CTTAAGGTTTGCCCATTCCCCCACCTTGTTGGAAGAAAGGCTGTAGGTATTGTTTAAGAGCTAAGCTGACACCGTGGAAGCTATAACA
TM2p	A2	Targeting	ARSF_-_2984740.23-P1P2	CTTAAGGTTTGCCCATTCCCCCACCTTGTTGGGCGGGCTGCAGATTAGCAAGTTTAAGAGCTAAGCTGACACCGTGGAAGCTATAACA
TM2p	A2	Targeting	ARSF_-_2984792.23-P1P2	CTTAAGGTTTGCCCATTCCCCCACCTTGTTGGGCCCTCCCATGGGAGAGAGGTTTAAGAGCTAAGCTGACACCGTGGAAGCTATAACA
TM2p	A2	Targeting	ARSF_-_2984846.23-P1P2	CTTAAGGTTTGCCCATTCCCCCACCTTGTTGGTCGAGGCAGCTGCCAAAAGGTTTAAGAGCTAAGCTGACACCGTGGAAGCTATAACA
TM2p	A2	Targeting	ARSH_+_2924341.23-ENST00000381130.2	CTTAAGGTTTGCCCATTCCCCCACCTTGTTGGCCGTAGCCTGTTAGCAACCGTTTAAGAGCTAAGCTGACACCGTGGAAGCTATAACA
TM2p	A2	Targeting	ARSH_+_2924381.23-ENST00000381130.2	CTTAAGGTTTGCCCATTCCCCCACCTTGTTGGACCGGGGTCCCCAATCCCCGTTTAAGAGCTAAGCTGACACCGTGGAAGCTATAACA
TM2p	A2	Targeting	ARSH_+_2924398.23-ENST00000381130.2	CTTAAGGTTTGCCCATTCCCCCACCTTGTTGGAAAAACTAATGTTCTATACGTTTAAGAGCTAAGCTGACACCGTGGAAGCTATAACA
TM2p	A2	Targeting	ARSH_-_2924244.23-ENST00000381130.2	CTTAAGGTTTGCCCATTCCCCCACCTTGTTGGATGCTGCTACCGATCTGACGTTTAAGAGCTAAGCTGACACCGTGGAAGCTATAACA
TM2p	A2	Targeting	ARSH_-_2924276.23-ENST00000381130.2	CTTAAGGTTTGCCCATTCCCCCACCTTGTTGGCAGGCAGTGATGCAAGCAAGTTTAAGAGCTAAGCTGACACCGTGGAAGCTATAACA
TM2p	A2	Targeting	ARSH_-_2924283.23-ENST00000381130.2	CTTAAGGTTTGCCCATTCCCCCACCTTGTTGGTGATGCAAGCAATGGGGAGGTTTAAGAGCTAAGCTGACACCGTGGAAGCTATAACA
TM2p	A2	Targeting	ARSH_-_2924392.23-ENST00000381130.2	CTTAAGGTTTGCCCATTCCCCCACCTTGTTGGTGGTCCATGGCCAGGGGATGTTTAAGAGCTAAGCTGACACCGTGGAAGCTATAACA
TM2p	A2	Targeting	ARSH_-_2924461.23-ENST00000381130.2	CTTAAGGTTTGCCCATTCCCCCACCTTGTTGGTTTCTGAGTAAGACAACACGTTTAAGAGCTAAGCTGACACCGTGGAAGCTATAACA
TM2p	A2	Targeting	ARSH_-_2924548.23-ENST00000381130.2	CTTAAGGTTTGCCCATTCCCCCACCTTGTTGGAATGTTAATTGATAGTGCCGTTTAAGAGCTAAGCTGACACCGTGGAAGCTATAACA
TM2p	A2	Targeting	ARSH_-_2924604.23-ENST00000381130.2	CTTAAGGTTTGCCCATTCCCCCACCTTGTTGGAAATGCTTTCAGGAGCTGCGTTTAAGAGCTAAGCTGACACCGTGGAAGCTATAACA
TM2p	A2	Targeting	ASTN1_+_177133935.23-P1P2	CTTAAGGTTTGCCCATTCCCCCACCTTGTTGGCATCTCATTCCGGGGTCCAGTTTAAGAGCTAAGCTGACACCGTGGAAGCTATAACA
TM2p	A2	Targeting	ASTN1_+_177133944.23-P1P2	CTTAAGGTTTGCCCATTCCCCCACCTTGTTGGTGCAAGCGGCATCTCATTCGTTTAAGAGCTAAGCTGACACCGTGGAAGCTATAACA
TM2p	A2	Targeting	ASTN1_+_177133999.23-P1P2	CTTAAGGTTTGCCCATTCCCCCACCTTGTTGGCCGGGAAACAAAGAATCCGGTTTAAGAGCTAAGCTGACACCGTGGAAGCTATAACA
TM2p	A2	Targeting	ASTN1_+_177134134.23-P1P2	CTTAAGGTTTGCCCATTCCCCCACCTTGTTGGGAGCACCGGCAGCCAGCTGGTTTAAGAGCTAAGCTGACACCGTGGAAGCTATAACA
TM2p	A2	Targeting	ASTN1_+_177134169.23-P1P2	CTTAAGGTTTGCCCATTCCCCCACCTTGTTGGCTCGTGTTGGAGGATGCAAGTTTAAGAGCTAAGCTGACACCGTGGAAGCTATAACA
TM2p	A2	Targeting	ASTN1_-_177133975.23-P1P2	CTTAAGGTTTGCCCATTCCCCCACCTTGTTGGATGCCGCTTGCAGAGTCCTGTTTAAGAGCTAAGCTGACACCGTGGAAGCTATAACA
TM2p	A2	Targeting	ASTN1_-_177134034.23-P1P2	CTTAAGGTTTGCCCATTCCCCCACCTTGTTGGTTTCCCGGAGCTGCTTATCGTTTAAGAGCTAAGCTGACACCGTGGAAGCTATAACA
TM2p	A2	Targeting	ASTN1_-_177134041.23-P1P2	CTTAAGGTTTGCCCATTCCCCCACCTTGTTGGGAGCTGCTTATCTGGAGAAGTTTAAGAGCTAAGCTGACACCGTGGAAGCTATAACA
TM2p	A2	Targeting	ASTN1_-_177134099.23-P1P2	CTTAAGGTTTGCCCATTCCCCCACCTTGTTGGAAGGACGTCGAAAGGAAAGGTTTAAGAGCTAAGCTGACACCGTGGAAGCTATAACA
TM2p	A2	Targeting	ASTN1_-_177134121.23-P1P2	CTTAAGGTTTGCCCATTCCCCCACCTTGTTGGAAGGGAGCTGAGGATTCTAGTTTAAGAGCTAAGCTGACACCGTGGAAGCTATAACA
TM2p	A2	Targeting	ASTN2_+_120177429.23-P1P2	CTTAAGGTTTGCCCATTCCCCCACCTTGTTGGGCCGGAGATCGGGGACGGGGTTTAAGAGCTAAGCTGACACCGTGGAAGCTATAACA
TM2p	A2	Targeting	ASTN2_+_120177433.23-P1P2	CTTAAGGTTTGCCCATTCCCCCACCTTGTTGGGGGAGCCGGAGATCGGGGAGTTTAAGAGCTAAGCTGACACCGTGGAAGCTATAACA
TM2p	A2	Targeting	ASTN2_+_120177453.23-P1P2	CTTAAGGTTTGCCCATTCCCCCACCTTGTTGGAAACGCTCGGGGTCTGCGGGTTTAAGAGCTAAGCTGACACCGTGGAAGCTATAACA
TM2p	A2	Targeting	ASTN2_+_120177464.23-P1P2	CTTAAGGTTTGCCCATTCCCCCACCTTGTTGGCGGAGCCTCCGAAACGCTCGTTTAAGAGCTAAGCTGACACCGTGGAAGCTATAACA
TM2p	A2	Targeting	ASTN2_+_120177524.23-P1P2	CTTAAGGTTTGCCCATTCCCCCACCTTGTTGGGGCGGAATTGGGGGATCTTGTTTAAGAGCTAAGCTGACACCGTGGAAGCTATAACA
TM2p	A2	Targeting	ASTN2_+_120177535.23-P1P2	CTTAAGGTTTGCCCATTCCCCCACCTTGTTGGAATGCTGTGAGGGCGGAATGTTTAAGAGCTAAGCTGACACCGTGGAAGCTATAACA
TM2p	A2	Targeting	ASTN2_+_120177628.23-P1P2	CTTAAGGTTTGCCCATTCCCCCACCTTGTTGGGAACTGGGTTGAGTCAGGGGTTTAAGAGCTAAGCTGACACCGTGGAAGCTATAACA
TM2p	A2	Targeting	ASTN2_+_120177790.23-P1P2	CTTAAGGTTTGCCCATTCCCCCACCTTGTTGGGGAGAAAGGACTTGTTCTTGTTTAAGAGCTAAGCTGACACCGTGGAAGCTATAACA
TM2p	A2	Targeting	ASTN2_-_120177449.23-P1P2	CTTAAGGTTTGCCCATTCCCCCACCTTGTTGGGCCGCCCGTCCCCGATCTCGTTTAAGAGCTAAGCTGACACCGTGGAAGCTATAACA
TM2p	A2	Targeting	ASTN2_-_120177480.23-P1P2	CTTAAGGTTTGCCCATTCCCCCACCTTGTTGGCAGACCCCGAGCGTTTCGGGTTTAAGAGCTAAGCTGACACCGTGGAAGCTATAACA
TM2p	A2	Targeting	ATRAID_+_27434706.23-P1P2	CTTAAGGTTTGCCCATTCCCCCACCTTGTTGGGGGAGCGGCGTCTGAGCCGGTTTAAGAGCTAAGCTGACACCGTGGAAGCTATAACA
TM2p	A2	Targeting	ATRAID_+_27434743.23-P1P2	CTTAAGGTTTGCCCATTCCCCCACCTTGTTGGGGGCCTGGAGAGCGTGAGCGTTTAAGAGCTAAGCTGACACCGTGGAAGCTATAACA
TM2p	A2	Targeting	ATRAID_+_27435139.23-P1P2	CTTAAGGTTTGCCCATTCCCCCACCTTGTTGGTCCCCGGGCGTGGCCTAAGGTTTAAGAGCTAAGCTGACACCGTGGAAGCTATAACA
TM2p	A2	Targeting	ATRAID_-_27434746.23-P1P2	CTTAAGGTTTGCCCATTCCCCCACCTTGTTGGCCCCGGTGCCTCTCGGCACGTTTAAGAGCTAAGCTGACACCGTGGAAGCTATAACA
TM2p	A2	Targeting	ATRAID_-_27434788.23-P1P2	CTTAAGGTTTGCCCATTCCCCCACCTTGTTGGCTGCCCGGTCTCCACACGTGTTTAAGAGCTAAGCTGACACCGTGGAAGCTATAACA
TM2p	A2	Targeting	ATRAID_-_27434892.23-P1P2	CTTAAGGTTTGCCCATTCCCCCACCTTGTTGGGTGCCGCCATGTTTACTGAGTTTAAGAGCTAAGCTGACACCGTGGAAGCTATAACA
TM2p	A2	Targeting	ATRAID_-_27434957.23-P1P2	CTTAAGGTTTGCCCATTCCCCCACCTTGTTGGTCCGGACGCGGGGAACACCGTTTAAGAGCTAAGCTGACACCGTGGAAGCTATAACA
TM2p	A2	Targeting	ATRAID_-_27435061.23-P1P2	CTTAAGGTTTGCCCATTCCCCCACCTTGTTGGGGCCAGTATCCCCGAAAGAGTTTAAGAGCTAAGCTGACACCGTGGAAGCTATAACA
TM2p	A2	Targeting	ATRAID_-_27435137.23-P1P2	CTTAAGGTTTGCCCATTCCCCCACCTTGTTGGAGCCCCAGGGCGACTGGACGTTTAAGAGCTAAGCTGACACCGTGGAAGCTATAACA
TM2p	A2	Targeting	ATRAID_-_27435166.23-P1P2	CTTAAGGTTTGCCCATTCCCCCACCTTGTTGGAGGCCACGCCCGGGGAAGAGTTTAAGAGCTAAGCTGACACCGTGGAAGCTATAACA
TM2p	A2	Targeting	ATRNL1_+_116852438.23-P1P2	CTTAAGGTTTGCCCATTCCCCCACCTTGTTGGCACGTTGTGGGGTCAGCGAGTTTAAGAGCTAAGCTGACACCGTGGAAGCTATAACA
TM2p	A2	Targeting	ATRNL1_+_116852829.23-P1P2	CTTAAGGTTTGCCCATTCCCCCACCTTGTTGGCCGCCCCTGACAGGGACCGGTTTAAGAGCTAAGCTGACACCGTGGAAGCTATAACA
TM2p	A2	Targeting	ATRNL1_+_116852914.23-P1P2	CTTAAGGTTTGCCCATTCCCCCACCTTGTTGGCCGGGAGCCCACGATGCGTGTTTAAGAGCTAAGCTGACACCGTGGAAGCTATAACA
TM2p	A2	Targeting	ATRNL1_+_116852989.23-P1P2	CTTAAGGTTTGCCCATTCCCCCACCTTGTTGGTCGCCCGCCCGGCGGTCAAGTTTAAGAGCTAAGCTGACACCGTGGAAGCTATAACA
TM2p	A2	Targeting	ATRNL1_+_116853043.23-P1P2	CTTAAGGTTTGCCCATTCCCCCACCTTGTTGGTGGGCGCGCCCAACGTGGAGTTTAAGAGCTAAGCTGACACCGTGGAAGCTATAACA
TM2p	A2	Targeting	ATRNL1_-_116852847.23-P1P2	CTTAAGGTTTGCCCATTCCCCCACCTTGTTGGAGTCCCCGGTCCCTGTCAGGTTTAAGAGCTAAGCTGACACCGTGGAAGCTATAACA
TM2p	A2	Targeting	ATRNL1_-_116852879.23-P1P2	CTTAAGGTTTGCCCATTCCCCCACCTTGTTGGCCAAGGCGCCGGGCCTGTGGTTTAAGAGCTAAGCTGACACCGTGGAAGCTATAACA
TM2p	A2	Targeting	ATRNL1_-_116852928.23-P1P2	CTTAAGGTTTGCCCATTCCCCCACCTTGTTGGGGGCGGCCCCACGCATCGTGTTTAAGAGCTAAGCTGACACCGTGGAAGCTATAACA
TM2p	A2	Targeting	ATRNL1_-_116852977.23-P1P2	CTTAAGGTTTGCCCATTCCCCCACCTTGTTGGCGAGGCACCGGAGACAGAAGTTTAAGAGCTAAGCTGACACCGTGGAAGCTATAACA
TM2p	A2	Targeting	ATRNL1_-_116853002.23-P1P2	CTTAAGGTTTGCCCATTCCCCCACCTTGTTGGCCGGGGCGCCCTTGACCGCGTTTAAGAGCTAAGCTGACACCGTGGAAGCTATAACA
TM2p	A2	Targeting	ATRN_+_3451514.23-P1P2	CTTAAGGTTTGCCCATTCCCCCACCTTGTTGGCGGAGGCGATCTTCTGACGGTTTAAGAGCTAAGCTGACACCGTGGAAGCTATAACA
TM2p	A2	Targeting	ATRN_+_3451533.23-P1P2	CTTAAGGTTTGCCCATTCCCCCACCTTGTTGGTCTCCGGCGTCCGCGGCGCGTTTAAGAGCTAAGCTGACACCGTGGAAGCTATAACA
TM2p	A2	Targeting	ATRN_+_3451539.23-P1P2	CTTAAGGTTTGCCCATTCCCCCACCTTGTTGGCAGTGGTCTCCGGCGTCCGGTTTAAGAGCTAAGCTGACACCGTGGAAGCTATAACA
TM2p	A2	Targeting	ATRN_+_3451555.23-P1P2	CTTAAGGTTTGCCCATTCCCCCACCTTGTTGGCGTGCGGGGGCGCAGACAGGTTTAAGAGCTAAGCTGACACCGTGGAAGCTATAACA
TM2p	A2	Targeting	ATRN_+_3451583.23-P1P2	CTTAAGGTTTGCCCATTCCCCCACCTTGTTGGCGCGCGTGCGCGAGTACGTGTTTAAGAGCTAAGCTGACACCGTGGAAGCTATAACA
TM2p	A2	Targeting	ATRN_+_3451625.23-P1P2	CTTAAGGTTTGCCCATTCCCCCACCTTGTTGGCGGTCCAAAGGGGCCACAGGTTTAAGAGCTAAGCTGACACCGTGGAAGCTATAACA
TM2p	A2	Targeting	ATRN_-_3451355.23-P1P2	CTTAAGGTTTGCCCATTCCCCCACCTTGTTGGCGTCCGGCAGCTGGAGTTAGTTTAAGAGCTAAGCTGACACCGTGGAAGCTATAACA
TM2p	A2	Targeting	ATRN_-_3451418.23-P1P2	CTTAAGGTTTGCCCATTCCCCCACCTTGTTGGGGCTCCTAGGCATCCAGTGGTTTAAGAGCTAAGCTGACACCGTGGAAGCTATAACA
TM2p	A2	Targeting	ATRN_-_3451455.23-P1P2	CTTAAGGTTTGCCCATTCCCCCACCTTGTTGGCGGGGACGAAAGGCGAAGGGTTTAAGAGCTAAGCTGACACCGTGGAAGCTATAACA
TM2p	A2	Targeting	ATRN_-_3451695.23-P1P2	CTTAAGGTTTGCCCATTCCCCCACCTTGTTGGCCCGCACGGCCAGGCGAAGGTTTAAGAGCTAAGCTGACACCGTGGAAGCTATAACA
TM2p	A2	Targeting	AUP1_+_74756994.23-P1P2	CTTAAGGTTTGCCCATTCCCCCACCTTGTTGGCCGGGACCAGGATTCCGGGGTTTAAGAGCTAAGCTGACACCGTGGAAGCTATAACA
TM2p	A2	Targeting	AUP1_+_74756998.23-P1P2	CTTAAGGTTTGCCCATTCCCCCACCTTGTTGGCACGCCGGGACCAGGATTCGTTTAAGAGCTAAGCTGACACCGTGGAAGCTATAACA
TM2p	A2	Targeting	AUP1_+_74757051.23-P1P2	CTTAAGGTTTGCCCATTCCCCCACCTTGTTGGCAGGCGGACAGTAGGACGCGTTTAAGAGCTAAGCTGACACCGTGGAAGCTATAACA
TM2p	A2	Targeting	AUP1_+_74757058.23-P1P2	CTTAAGGTTTGCCCATTCCCCCACCTTGTTGGACGCGAGCAGGCGGACAGTGTTTAAGAGCTAAGCTGACACCGTGGAAGCTATAACA
TM2p	A2	Targeting	AUP1_+_74757080.23-P1P2	CTTAAGGTTTGCCCATTCCCCCACCTTGTTGGCTACTCAGAGGCGGCACCCGTTTAAGAGCTAAGCTGACACCGTGGAAGCTATAACA
TM2p	A2	Targeting	AUP1_+_74757088.23-P1P2	CTTAAGGTTTGCCCATTCCCCCACCTTGTTGGCGCCCGCCCTACTCAGAGGGTTTAAGAGCTAAGCTGACACCGTGGAAGCTATAACA
TM2p	A2	Targeting	AUP1_-_74756949.23-P1P2	CTTAAGGTTTGCCCATTCCCCCACCTTGTTGGCCGTCTCACAACTCGCGTCGTTTAAGAGCTAAGCTGACACCGTGGAAGCTATAACA
TM2p	A2	Targeting	AUP1_-_74756978.23-P1P2	CTTAAGGTTTGCCCATTCCCCCACCTTGTTGGCACAATTCCCGGCATTCGTGTTTAAGAGCTAAGCTGACACCGTGGAAGCTATAACA
TM2p	A2	Targeting	AUP1_-_74757031.23-P1P2	CTTAAGGTTTGCCCATTCCCCCACCTTGTTGGTCCCGGCGTGCACTTCTGAGTTTAAGAGCTAAGCTGACACCGTGGAAGCTATAACA
TM2p	A2	Targeting	AUP1_-_74757106.23-P1P2	CTTAAGGTTTGCCCATTCCCCCACCTTGTTGGGTGCCGCCTCTGAGTAGGGGTTTAAGAGCTAAGCTGACACCGTGGAAGCTATAACA
TM2p	A2	Targeting	AVPR1A_+_63545037.23-P1P2	CTTAAGGTTTGCCCATTCCCCCACCTTGTTGGCCCCTCCACAGTGATGCAGGTTTAAGAGCTAAGCTGACACCGTGGAAGCTATAACA
TM2p	A2	Targeting	AVPR1A_+_63545193.23-P1P2	CTTAAGGTTTGCCCATTCCCCCACCTTGTTGGTAGCGAGGAAGGCTAGTGAGTTTAAGAGCTAAGCTGACACCGTGGAAGCTATAACA
TM2p	A2	Targeting	AVPR1A_+_63545203.23-P1P2	CTTAAGGTTTGCCCATTCCCCCACCTTGTTGGTTAAGGAGGCTAGCGAGGAGTTTAAGAGCTAAGCTGACACCGTGGAAGCTATAACA
TM2p	A2	Targeting	AVPR1A_+_63545274.23-P1P2	CTTAAGGTTTGCCCATTCCCCCACCTTGTTGGTGGACGCCGGTGCGTGGACGTTTAAGAGCTAAGCTGACACCGTGGAAGCTATAACA
TM2p	A2	Targeting	AVPR1A_+_63545286.23-P1P2	CTTAAGGTTTGCCCATTCCCCCACCTTGTTGGGAGCTAGATGCGTGGACGCGTTTAAGAGCTAAGCTGACACCGTGGAAGCTATAACA
TM2p	A2	Targeting	AVPR1A_+_63545336.23-P1P2	CTTAAGGTTTGCCCATTCCCCCACCTTGTTGGAAGAAACCCGGACTGGAGGGTTTAAGAGCTAAGCTGACACCGTGGAAGCTATAACA
TM2p	A2	Targeting	AVPR1A_-_63545057.23-P1P2	CTTAAGGTTTGCCCATTCCCCCACCTTGTTGGTCCTCTGCATCACTGTGGAGTTTAAGAGCTAAGCTGACACCGTGGAAGCTATAACA
TM2p	A2	Targeting	AVPR1A_-_63545100.23-P1P2	CTTAAGGTTTGCCCATTCCCCCACCTTGTTGGGATTCCTCCTCACAGTAGGGTTTAAGAGCTAAGCTGACACCGTGGAAGCTATAACA
TM2p	A2	Targeting	AVPR1A_-_63545289.23-P1P2	CTTAAGGTTTGCCCATTCCCCCACCTTGTTGGAAACCTCCAGTCCACGCACGTTTAAGAGCTAAGCTGACACCGTGGAAGCTATAACA
TM2p	A2	Targeting	AVPR1A_-_63545323.23-P1P2	CTTAAGGTTTGCCCATTCCCCCACCTTGTTGGTAGCTCCTGCACCTGAACCGTTTAAGAGCTAAGCTGACACCGTGGAAGCTATAACA
TM2p	A2	Targeting	BAI1_+_143530480.23-P1P2	CTTAAGGTTTGCCCATTCCCCCACCTTGTTGGCTAGGCAATGCAGGTGCGTGTTTAAGAGCTAAGCTGACACCGTGGAAGCTATAACA
TM2p	A2	Targeting	BAI1_+_143530576.23-P1P2	CTTAAGGTTTGCCCATTCCCCCACCTTGTTGGAGCAGGGGAGTGGCCCCACGTTTAAGAGCTAAGCTGACACCGTGGAAGCTATAACA
TM2p	A2	Targeting	BAI1_+_143530702.23-P1P2	CTTAAGGTTTGCCCATTCCCCCACCTTGTTGGGGAGGGGAGCGAGATAAGGGTTTAAGAGCTAAGCTGACACCGTGGAAGCTATAACA
TM2p	A2	Targeting	BAI1_+_143530798.23-P1P2	CTTAAGGTTTGCCCATTCCCCCACCTTGTTGGGGAGCCAGAGACTGCATTAGTTTAAGAGCTAAGCTGACACCGTGGAAGCTATAACA
TM2p	A2	Targeting	BAI1_+_143530818.23-P1P2	CTTAAGGTTTGCCCATTCCCCCACCTTGTTGGTGAAACTGGATCCCGAATCGTTTAAGAGCTAAGCTGACACCGTGGAAGCTATAACA
TM2p	A2	Targeting	BAI1_-_143530773.23-P1P2	CTTAAGGTTTGCCCATTCCCCCACCTTGTTGGCCCCCTCTAATGTGTGATCGTTTAAGAGCTAAGCTGACACCGTGGAAGCTATAACA
TM2p	A2	Targeting	BAI1_-_143530815.23-P1P2	CTTAAGGTTTGCCCATTCCCCCACCTTGTTGGTAATCCGTAATGCAGTCTCGTTTAAGAGCTAAGCTGACACCGTGGAAGCTATAACA
TM2p	A2	Targeting	BAI1_-_143530827.23-P1P2	CTTAAGGTTTGCCCATTCCCCCACCTTGTTGGCAGTCTCTGGCTCCCGATTGTTTAAGAGCTAAGCTGACACCGTGGAAGCTATAACA
TM2p	A2	Targeting	BAI1_-_143530865.23-P1P2	CTTAAGGTTTGCCCATTCCCCCACCTTGTTGGGCGAGAGATTGGGGAGCGCGTTTAAGAGCTAAGCTGACACCGTGGAAGCTATAACA
TM2p	A2	Targeting	BAI1_-_143531007.23-P1P2	CTTAAGGTTTGCCCATTCCCCCACCTTGTTGGTCGCCAGGAAGGGGAAAAAGTTTAAGAGCTAAGCTGACACCGTGGAAGCTATAACA
TM2p	A2	Targeting	BAI2_+_32229837.23-P1P2	CTTAAGGTTTGCCCATTCCCCCACCTTGTTGGACCGAAGAGGATGCGGCACGTTTAAGAGCTAAGCTGACACCGTGGAAGCTATAACA
TM2p	A2	Targeting	BAI2_+_32229849.23-P1P2	CTTAAGGTTTGCCCATTCCCCCACCTTGTTGGCGGCGCTCAGAGACCGAAGGTTTAAGAGCTAAGCTGACACCGTGGAAGCTATAACA
TM2p	A2	Targeting	BAI2_+_32230137.23-P1P2	CTTAAGGTTTGCCCATTCCCCCACCTTGTTGGCTGGGCGGGGGCTTACCCAGTTTAAGAGCTAAGCTGACACCGTGGAAGCTATAACA
TM2p	A2	Targeting	BAI2_+_32230192.23-P1P2	CTTAAGGTTTGCCCATTCCCCCACCTTGTTGGTATAGCTGGAGGGGCGTCGGTTTAAGAGCTAAGCTGACACCGTGGAAGCTATAACA
TM2p	A2	Targeting	BAI2_-_32229901.23-P1P2	CTTAAGGTTTGCCCATTCCCCCACCTTGTTGGCCGCCGAACCCGGTTCCTCGTTTAAGAGCTAAGCTGACACCGTGGAAGCTATAACA
TM2p	A2	Targeting	BAI2_-_32229934.23-P1P2	CTTAAGGTTTGCCCATTCCCCCACCTTGTTGGGCTGCCCGCAGCGCGCGCCGTTTAAGAGCTAAGCTGACACCGTGGAAGCTATAACA
TM2p	A2	Targeting	BAI2_-_32229945.23-P1P2	CTTAAGGTTTGCCCATTCCCCCACCTTGTTGGCGCGCGCCGGGCCGAGTGAGTTTAAGAGCTAAGCTGACACCGTGGAAGCTATAACA
TM2p	A2	Targeting	BAI2_-_32229961.23-P1P2	CTTAAGGTTTGCCCATTCCCCCACCTTGTTGGTGACGGCCGAGGCGGGACGGTTTAAGAGCTAAGCTGACACCGTGGAAGCTATAACA
TM2p	A2	Targeting	BAI2_-_32230028.23-P1P2	CTTAAGGTTTGCCCATTCCCCCACCTTGTTGGCGCGAGGAGCCGCGGGAGAGTTTAAGAGCTAAGCTGACACCGTGGAAGCTATAACA
TM2p	A2	Targeting	BAI2_-_32230063.23-P1P2	CTTAAGGTTTGCCCATTCCCCCACCTTGTTGGCGCGCCGCCTCCTGTTAAAGTTTAAGAGCTAAGCTGACACCGTGGAAGCTATAACA
TM2p	A2	Targeting	BAI3_+_69345074.23-P1P2	CTTAAGGTTTGCCCATTCCCCCACCTTGTTGGTCGTGTGCGCGCGCGTCCCGTTTAAGAGCTAAGCTGACACCGTGGAAGCTATAACA
TM2p	A2	Targeting	BAI3_+_69345126.23-P1P2	CTTAAGGTTTGCCCATTCCCCCACCTTGTTGGCGGGGGGTGCGCGTGTCCCGTTTAAGAGCTAAGCTGACACCGTGGAAGCTATAACA
TM2p	A2	Targeting	BAI3_+_69345156.23-P1P2	CTTAAGGTTTGCCCATTCCCCCACCTTGTTGGGCAGTGCTCGCTCTCCCTTGTTTAAGAGCTAAGCTGACACCGTGGAAGCTATAACA
TM2p	A2	Targeting	BAI3_+_69345181.23-P1P2	CTTAAGGTTTGCCCATTCCCCCACCTTGTTGGCTGTCTCGGGTGTGCGCGCGTTTAAGAGCTAAGCTGACACCGTGGAAGCTATAACA
TM2p	A2	Targeting	BAI3_-_69345000.23-P1P2	CTTAAGGTTTGCCCATTCCCCCACCTTGTTGGGAACTCCAGGAAGTCGCAGGTTTAAGAGCTAAGCTGACACCGTGGAAGCTATAACA
TM2p	A2	Targeting	BAI3_-_69345033.23-P1P2	CTTAAGGTTTGCCCATTCCCCCACCTTGTTGGGAGCCGAGCCTCTGGCGGGGTTTAAGAGCTAAGCTGACACCGTGGAAGCTATAACA
TM2p	A2	Targeting	BAI3_-_69345064.23-P1P2	CTTAAGGTTTGCCCATTCCCCCACCTTGTTGGCCGCAGCTGTGCATAAGAAGTTTAAGAGCTAAGCTGACACCGTGGAAGCTATAACA
TM2p	A2	Targeting	BAI3_-_69345079.23-P1P2	CTTAAGGTTTGCCCATTCCCCCACCTTGTTGGAGAAGGGCGCGCGGCACCCGTTTAAGAGCTAAGCTGACACCGTGGAAGCTATAACA
TM2p	A2	Targeting	BAI3_-_69345104.23-P1P2	CTTAAGGTTTGCCCATTCCCCCACCTTGTTGGCGCGCGCACACGAGCACGCGTTTAAGAGCTAAGCTGACACCGTGGAAGCTATAACA
TM2p	A2	Targeting	BAI3_-_69345107.23-P1P2	CTTAAGGTTTGCCCATTCCCCCACCTTGTTGGGCGCACACGAGCACGCGGGGTTTAAGAGCTAAGCTGACACCGTGGAAGCTATAACA
TM2p	A2	Targeting	BDKRB1_+_96722173.23-P1P2	CTTAAGGTTTGCCCATTCCCCCACCTTGTTGGGCTCTGCAGCAGCTTTTGTGTTTAAGAGCTAAGCTGACACCGTGGAAGCTATAACA
TM2p	A2	Targeting	BDKRB1_+_96722265.23-P1P2	CTTAAGGTTTGCCCATTCCCCCACCTTGTTGGACATCGCCAACTTGCCCCAGTTTAAGAGCTAAGCTGACACCGTGGAAGCTATAACA
TM2p	A2	Targeting	BDKRB1_+_96722313.23-P1P2	CTTAAGGTTTGCCCATTCCCCCACCTTGTTGGCTGCCCAAGACCTGTATGTGTTTAAGAGCTAAGCTGACACCGTGGAAGCTATAACA
TM2p	A2	Targeting	BDKRB1_+_96722344.23-P1P2	CTTAAGGTTTGCCCATTCCCCCACCTTGTTGGACTTTGGTACCATCTGCAGGTTTAAGAGCTAAGCTGACACCGTGGAAGCTATAACA
TM2p	A2	Targeting	BDKRB1_+_96722359.23-P1P2	CTTAAGGTTTGCCCATTCCCCCACCTTGTTGGACCATCTCCCCCTTTACTTGTTTAAGAGCTAAGCTGACACCGTGGAAGCTATAACA
TM2p	A2	Targeting	BDKRB1_+_96722402.23-P1P2	CTTAAGGTTTGCCCATTCCCCCACCTTGTTGGCATTTCACTTTGCACTTTAGTTTAAGAGCTAAGCTGACACCGTGGAAGCTATAACA
TM2p	A2	Targeting	BDKRB1_+_96722463.23-P1P2	CTTAAGGTTTGCCCATTCCCCCACCTTGTTGGGCCGCAAAAGTGAGTCTTTGTTTAAGAGCTAAGCTGACACCGTGGAAGCTATAACA
TM2p	A2	Targeting	BDKRB1_-_96722170.23-P1P2	CTTAAGGTTTGCCCATTCCCCCACCTTGTTGGCAAAAGAGGCCATTCGAAGGTTTAAGAGCTAAGCTGACACCGTGGAAGCTATAACA
TM2p	A2	Targeting	BDKRB1_-_96722370.23-P1P2	CTTAAGGTTTGCCCATTCCCCCACCTTGTTGGGCAGATGGTACCAAAGTAAGTTTAAGAGCTAAGCTGACACCGTGGAAGCTATAACA
TM2p	A2	Targeting	BDKRB1_-_96722507.23-P1P2	CTTAAGGTTTGCCCATTCCCCCACCTTGTTGGATCCCCACAATGACATCACGTTTAAGAGCTAAGCTGACACCGTGGAAGCTATAACA
TM2p	A2	Targeting	BDKRB2_+_96670894.23-P1P2	CTTAAGGTTTGCCCATTCCCCCACCTTGTTGGCTCCCGGCTGACCACAAAGGTTTAAGAGCTAAGCTGACACCGTGGAAGCTATAACA
TM2p	A2	Targeting	BDKRB2_+_96670909.23-P1P2	CTTAAGGTTTGCCCATTCCCCCACCTTGTTGGACGGCAAAAACGTCCCTCCGTTTAAGAGCTAAGCTGACACCGTGGAAGCTATAACA
TM2p	A2	Targeting	BDKRB2_+_96670927.23-P1P2	CTTAAGGTTTGCCCATTCCCCCACCTTGTTGGGCCCGTTGGAGTCGTGGGAGTTTAAGAGCTAAGCTGACACCGTGGAAGCTATAACA
TM2p	A2	Targeting	BDKRB2_+_96670931.23-P1P2	CTTAAGGTTTGCCCATTCCCCCACCTTGTTGGGGCTGCCCGTTGGAGTCGTGTTTAAGAGCTAAGCTGACACCGTGGAAGCTATAACA
TM2p	A2	Targeting	BDKRB2_+_96670993.23-P1P2	CTTAAGGTTTGCCCATTCCCCCACCTTGTTGGGCCACCCTCTGAGCCCTGGGTTTAAGAGCTAAGCTGACACCGTGGAAGCTATAACA
TM2p	A2	Targeting	BDKRB2_+_96671035.23-P1P2	CTTAAGGTTTGCCCATTCCCCCACCTTGTTGGTGTGGGGCCGGGAAGGCTGGTTTAAGAGCTAAGCTGACACCGTGGAAGCTATAACA
TM2p	A2	Targeting	BDKRB2_-_96670596.23-P1P2	CTTAAGGTTTGCCCATTCCCCCACCTTGTTGGCCAGCCTGAGCCTTGACATGTTTAAGAGCTAAGCTGACACCGTGGAAGCTATAACA
TM2p	A2	Targeting	BDKRB2_-_96670645.23-P1P2	CTTAAGGTTTGCCCATTCCCCCACCTTGTTGGAAACGGCCGCGTGTCTCAGGTTTAAGAGCTAAGCTGACACCGTGGAAGCTATAACA
TM2p	A2	Targeting	BDKRB2_-_96670946.23-P1P2	CTTAAGGTTTGCCCATTCCCCCACCTTGTTGGTGCCGTCCCACGACTCCAAGTTTAAGAGCTAAGCTGACACCGTGGAAGCTATAACA
TM2p	A2	Targeting	BDKRB2_-_96671031.23-P1P2	CTTAAGGTTTGCCCATTCCCCCACCTTGTTGGGTGGCAGAGCGGAGAGCGAGTTTAAGAGCTAAGCTGACACCGTGGAAGCTATAACA
TM2p	A2	Targeting	BEST3_+_70093197.23-P1P2	CTTAAGGTTTGCCCATTCCCCCACCTTGTTGGCTGTCATCAGTGGCTAAACGTTTAAGAGCTAAGCTGACACCGTGGAAGCTATAACA
TM2p	A2	Targeting	BEST3_+_70093206.23-P1P2	CTTAAGGTTTGCCCATTCCCCCACCTTGTTGGCAGCTATAACTGTCATCAGGTTTAAGAGCTAAGCTGACACCGTGGAAGCTATAACA
TM2p	A2	Targeting	BEST3_+_70093289.23-P1P2	CTTAAGGTTTGCCCATTCCCCCACCTTGTTGGAAGGGGTACTTGGGGTGGCGTTTAAGAGCTAAGCTGACACCGTGGAAGCTATAACA
TM2p	A2	Targeting	BEST3_+_70093296.23-P1P2	CTTAAGGTTTGCCCATTCCCCCACCTTGTTGGTCATTCAAAGGGGTACTTGGTTTAAGAGCTAAGCTGACACCGTGGAAGCTATAACA
TM2p	A2	Targeting	BEST3_+_70093305.23-P1P2	CTTAAGGTTTGCCCATTCCCCCACCTTGTTGGGCCAACTTCTCATTCAAAGGTTTAAGAGCTAAGCTGACACCGTGGAAGCTATAACA
TM2p	A2	Targeting	BEST3_-_70093161.23-P1P2	CTTAAGGTTTGCCCATTCCCCCACCTTGTTGGCAGAGTGTGACAAGAACAGGTTTAAGAGCTAAGCTGACACCGTGGAAGCTATAACA
TM2p	A2	Targeting	BEST3_-_70093325.23-P1P2	CTTAAGGTTTGCCCATTCCCCCACCTTGTTGGACCCCTTTGAATGAGAAGTGTTTAAGAGCTAAGCTGACACCGTGGAAGCTATAACA
TM2p	A2	Targeting	BEST3_-_70093347.23-P1P2	CTTAAGGTTTGCCCATTCCCCCACCTTGTTGGCAGTGACATGAAGGATGTTGTTTAAGAGCTAAGCTGACACCGTGGAAGCTATAACA
TM2p	A2	Targeting	BEST3_-_70093399.23-P1P2	CTTAAGGTTTGCCCATTCCCCCACCTTGTTGGCCCTGGGATCAAGGAAGAAGTTTAAGAGCTAAGCTGACACCGTGGAAGCTATAACA
TM2p	A2	Targeting	BEST3_-_70093408.23-P1P2	CTTAAGGTTTGCCCATTCCCCCACCTTGTTGGCAAGGAAGAAAGGTTGATTGTTTAAGAGCTAAGCTGACACCGTGGAAGCTATAACA
TM2p	A2	Targeting	BEST4_+_45253936.23-P1P2	CTTAAGGTTTGCCCATTCCCCCACCTTGTTGGTCCCAGCACCAGGGGAAGCGTTTAAGAGCTAAGCTGACACCGTGGAAGCTATAACA
TM2p	A2	Targeting	BEST4_+_45253976.23-P1P2	CTTAAGGTTTGCCCATTCCCCCACCTTGTTGGGGCCAGCCCAACCCTACAGGTTTAAGAGCTAAGCTGACACCGTGGAAGCTATAACA
TM2p	A2	Targeting	BEST4_+_45254028.23-P1P2	CTTAAGGTTTGCCCATTCCCCCACCTTGTTGGGTCGTCTGTGTGAGCTGTGGTTTAAGAGCTAAGCTGACACCGTGGAAGCTATAACA
TM2p	A2	Targeting	BEST4_+_45254051.23-P1P2	CTTAAGGTTTGCCCATTCCCCCACCTTGTTGGCATACTGGCTTGAAGGACAGTTTAAGAGCTAAGCTGACACCGTGGAAGCTATAACA
TM2p	A2	Targeting	BEST4_-_45253921.23-P1P2	CTTAAGGTTTGCCCATTCCCCCACCTTGTTGGGACTGAGGCCTATCATTGAGTTTAAGAGCTAAGCTGACACCGTGGAAGCTATAACA
TM2p	A2	Targeting	BEST4_-_45253985.23-P1P2	CTTAAGGTTTGCCCATTCCCCCACCTTGTTGGTGTGTCTCCTTACCCCTGTGTTTAAGAGCTAAGCTGACACCGTGGAAGCTATAACA
TM2p	A2	Targeting	BEST4_-_45253991.23-P1P2	CTTAAGGTTTGCCCATTCCCCCACCTTGTTGGTCCTTACCCCTGTAGGGTTGTTTAAGAGCTAAGCTGACACCGTGGAAGCTATAACA
TM2p	A2	Targeting	BEST4_-_45253995.23-P1P2	CTTAAGGTTTGCCCATTCCCCCACCTTGTTGGTACCCCTGTAGGGTTGGGCGTTTAAGAGCTAAGCTGACACCGTGGAAGCTATAACA
TM2p	A2	Targeting	BEST4_-_45254006.23-P1P2	CTTAAGGTTTGCCCATTCCCCCACCTTGTTGGGGTTGGGCTGGCCTTCGAGGTTTAAGAGCTAAGCTGACACCGTGGAAGCTATAACA
TM2p	A2	Targeting	BEST4_-_45254077.23-P1P2	CTTAAGGTTTGCCCATTCCCCCACCTTGTTGGTCCTTCAAGCCAGTATGACGTTTAAGAGCTAAGCTGACACCGTGGAAGCTATAACA
TM2p	A2	Targeting	BFAR_+_14726562.23-P1P2	CTTAAGGTTTGCCCATTCCCCCACCTTGTTGGGTCACAGCCCAAGGGGTGAGTTTAAGAGCTAAGCTGACACCGTGGAAGCTATAACA
TM2p	A2	Targeting	BFAR_+_14726592.23-P1P2	CTTAAGGTTTGCCCATTCCCCCACCTTGTTGGCACCCAGAGACCGAGTACCGTTTAAGAGCTAAGCTGACACCGTGGAAGCTATAACA
TM2p	A2	Targeting	BFAR_+_14726631.23-P1P2	CTTAAGGTTTGCCCATTCCCCCACCTTGTTGGGGCGCATGCGTAATACCGCGTTTAAGAGCTAAGCTGACACCGTGGAAGCTATAACA
TM2p	A2	Targeting	BFAR_+_14726651.23-P1P2	CTTAAGGTTTGCCCATTCCCCCACCTTGTTGGACTCCCAGCCGGAGGAAGTGTTTAAGAGCTAAGCTGACACCGTGGAAGCTATAACA
TM2p	A2	Targeting	BFAR_-_14726576.23-P1P2	CTTAAGGTTTGCCCATTCCCCCACCTTGTTGGCACACACCCGTCACCCCTTGTTTAAGAGCTAAGCTGACACCGTGGAAGCTATAACA
TM2p	A2	Targeting	BFAR_-_14726603.23-P1P2	CTTAAGGTTTGCCCATTCCCCCACCTTGTTGGACTGCCGAGCCCGGGTACTGTTTAAGAGCTAAGCTGACACCGTGGAAGCTATAACA
TM2p	A2	Targeting	BFAR_-_14726610.23-P1P2	CTTAAGGTTTGCCCATTCCCCCACCTTGTTGGAGCCCGGGTACTCGGTCTCGTTTAAGAGCTAAGCTGACACCGTGGAAGCTATAACA
TM2p	A2	Targeting	BFAR_-_14726624.23-P1P2	CTTAAGGTTTGCCCATTCCCCCACCTTGTTGGGTCTCTGGGTGAAGAGGAAGTTTAAGAGCTAAGCTGACACCGTGGAAGCTATAACA
TM2p	A2	Targeting	BFAR_-_14726711.23-P1P2	CTTAAGGTTTGCCCATTCCCCCACCTTGTTGGGGGAGGTCGCGGGGTTGAGGTTTAAGAGCTAAGCTGACACCGTGGAAGCTATAACA
TM2p	A2	Targeting	BFAR_-_14726723.23-P1P2	CTTAAGGTTTGCCCATTCCCCCACCTTGTTGGGGTTGAGGGGGGTTGTGAAGTTTAAGAGCTAAGCTGACACCGTGGAAGCTATAACA
TM2p	A2	Targeting	BMPR2_+_203240775.23-P1P2	CTTAAGGTTTGCCCATTCCCCCACCTTGTTGGCTCTCCGGTGAATGGCCGAGTTTAAGAGCTAAGCTGACACCGTGGAAGCTATAACA
TM2p	A2	Targeting	BMPR2_+_203240789.23-P1P2	CTTAAGGTTTGCCCATTCCCCCACCTTGTTGGCCACCGCAGCGCGTCTCTCGTTTAAGAGCTAAGCTGACACCGTGGAAGCTATAACA
TM2p	A2	Targeting	BMPR2_+_203240822.23-P1P2	CTTAAGGTTTGCCCATTCCCCCACCTTGTTGGCCTCGTTCGGGGCTGGCTGGTTTAAGAGCTAAGCTGACACCGTGGAAGCTATAACA
TM2p	A2	Targeting	BMPR2_+_203240828.23-P1P2	CTTAAGGTTTGCCCATTCCCCCACCTTGTTGGCCCGCCCCTCGTTCGGGGCGTTTAAGAGCTAAGCTGACACCGTGGAAGCTATAACA
TM2p	A2	Targeting	BMPR2_+_203240832.23-P1P2	CTTAAGGTTTGCCCATTCCCCCACCTTGTTGGCGGCCCCGCCCCTCGTTCGGTTTAAGAGCTAAGCTGACACCGTGGAAGCTATAACA
TM2p	A2	Targeting	BMPR2_+_203241012.23-P1P2	CTTAAGGTTTGCCCATTCCCCCACCTTGTTGGCTGCGGCGCTCCCGGTCACGTTTAAGAGCTAAGCTGACACCGTGGAAGCTATAACA
TM2p	A2	Targeting	BMPR2_-_203240807.23-P1P2	CTTAAGGTTTGCCCATTCCCCCACCTTGTTGGTCACCGGAGAGACGCGCTGGTTTAAGAGCTAAGCTGACACCGTGGAAGCTATAACA
TM2p	A2	Targeting	BMPR2_-_203240848.23-P1P2	CTTAAGGTTTGCCCATTCCCCCACCTTGTTGGGCCAGCCCCGAACGAGGGGGTTTAAGAGCTAAGCTGACACCGTGGAAGCTATAACA
TM2p	A2	Targeting	BMPR2_-_203240980.23-P1P2	CTTAAGGTTTGCCCATTCCCCCACCTTGTTGGGAAGAGCCGGAGACTGAGGGTTTAAGAGCTAAGCTGACACCGTGGAAGCTATAACA
TM2p	A2	Targeting	BMPR2_-_203241022.23-P1P2	CTTAAGGTTTGCCCATTCCCCCACCTTGTTGGGCGGGGCGACTCCGGTGACGTTTAAGAGCTAAGCTGACACCGTGGAAGCTATAACA
TM2p	A2	Targeting	BRI3BP_+_125477636.23-P1P2	CTTAAGGTTTGCCCATTCCCCCACCTTGTTGGCAACCAAGAGGGGAGGGTTGTTTAAGAGCTAAGCTGACACCGTGGAAGCTATAACA
TM2p	A2	Targeting	BRI3BP_+_125477641.23-P1P2	CTTAAGGTTTGCCCATTCCCCCACCTTGTTGGGGGTACAACCAAGAGGGGAGTTTAAGAGCTAAGCTGACACCGTGGAAGCTATAACA
TM2p	A2	Targeting	BRI3BP_+_125478106.23-P1P2	CTTAAGGTTTGCCCATTCCCCCACCTTGTTGGGACCAACGCGACCCGGCCCGTTTAAGAGCTAAGCTGACACCGTGGAAGCTATAACA
TM2p	A2	Targeting	BRI3BP_+_125478168.23-P1P2	CTTAAGGTTTGCCCATTCCCCCACCTTGTTGGTGCCCCGCCCCGCGCGCAAGTTTAAGAGCTAAGCTGACACCGTGGAAGCTATAACA
TM2p	A2	Targeting	BRI3BP_-_125477899.23-P1P2	CTTAAGGTTTGCCCATTCCCCCACCTTGTTGGCCCACGAGGGCGAATTTTGGTTTAAGAGCTAAGCTGACACCGTGGAAGCTATAACA
TM2p	A2	Targeting	BRI3BP_-_125478001.23-P1P2	CTTAAGGTTTGCCCATTCCCCCACCTTGTTGGAAGCTGTTGCAAGTTTTACGTTTAAGAGCTAAGCTGACACCGTGGAAGCTATAACA
TM2p	A2	Targeting	BRI3BP_-_125478075.23-P1P2	CTTAAGGTTTGCCCATTCCCCCACCTTGTTGGATGAGAAGCCGCACCGGGTGTTTAAGAGCTAAGCTGACACCGTGGAAGCTATAACA
TM2p	A2	Targeting	BRI3BP_-_125478088.23-P1P2	CTTAAGGTTTGCCCATTCCCCCACCTTGTTGGCCGGGTCGGGGCAGGCTTCGTTTAAGAGCTAAGCTGACACCGTGGAAGCTATAACA
TM2p	A2	Targeting	BRI3BP_-_125478125.23-P1P2	CTTAAGGTTTGCCCATTCCCCCACCTTGTTGGCCCCGGGGCCGGGTCGCGTGTTTAAGAGCTAAGCTGACACCGTGGAAGCTATAACA
TM2p	A2	Targeting	BRI3BP_-_125478227.23-P1P2	CTTAAGGTTTGCCCATTCCCCCACCTTGTTGGCGGCGGCGGCTGTGGGTAAGTTTAAGAGCTAAGCTGACACCGTGGAAGCTATAACA
TM2p	A2	Targeting	BRI3_+_97910625.23-P1P2	CTTAAGGTTTGCCCATTCCCCCACCTTGTTGGTCCCCCTACCGGTGGAGGAGTTTAAGAGCTAAGCTGACACCGTGGAAGCTATAACA
TM2p	A2	Targeting	BRI3_+_97910635.23-P1P2	CTTAAGGTTTGCCCATTCCCCCACCTTGTTGGCCGGCCGAGGTCCCCCTACGTTTAAGAGCTAAGCTGACACCGTGGAAGCTATAACA
TM2p	A2	Targeting	BRI3_+_97910774.23-P1P2	CTTAAGGTTTGCCCATTCCCCCACCTTGTTGGCTGCTCTCTAGACCTCCCGGTTTAAGAGCTAAGCTGACACCGTGGAAGCTATAACA
TM2p	A2	Targeting	BRI3_+_97910858.23-P1P2	CTTAAGGTTTGCCCATTCCCCCACCTTGTTGGCCGGCGGGGCGTCTTAAAGGTTTAAGAGCTAAGCTGACACCGTGGAAGCTATAACA
TM2p	A2	Targeting	BRI3_+_97910917.23-P1P2	CTTAAGGTTTGCCCATTCCCCCACCTTGTTGGGGGCCCAGTCACAAGACCGGTTTAAGAGCTAAGCTGACACCGTGGAAGCTATAACA
TM2p	A2	Targeting	BRI3_-_97910556.23-P1P2	CTTAAGGTTTGCCCATTCCCCCACCTTGTTGGTGGAAGCGCTGGCGATCATGTTTAAGAGCTAAGCTGACACCGTGGAAGCTATAACA
TM2p	A2	Targeting	BRI3_-_97910680.23-P1P2	CTTAAGGTTTGCCCATTCCCCCACCTTGTTGGTGGGAGATCGGGGCGTAGGGTTTAAGAGCTAAGCTGACACCGTGGAAGCTATAACA
TM2p	A2	Targeting	BRI3_-_97910735.23-P1P2	CTTAAGGTTTGCCCATTCCCCCACCTTGTTGGTGACCCTATGGGGCGTCTCGTTTAAGAGCTAAGCTGACACCGTGGAAGCTATAACA
TM2p	A2	Targeting	BRI3_-_97910746.23-P1P2	CTTAAGGTTTGCCCATTCCCCCACCTTGTTGGGGCGTCTCTGGGTCGTCGTGTTTAAGAGCTAAGCTGACACCGTGGAAGCTATAACA
TM2p	A2	Targeting	BRI3_-_97910804.23-P1P2	CTTAAGGTTTGCCCATTCCCCCACCTTGTTGGGTCTAGAGAGCAGCGGCGGGTTTAAGAGCTAAGCTGACACCGTGGAAGCTATAACA
TM2p	A2	Targeting	BRS3_+_135569875.23-P1P2	CTTAAGGTTTGCCCATTCCCCCACCTTGTTGGTACCCAGGATGGTCTATATGTTTAAGAGCTAAGCTGACACCGTGGAAGCTATAACA
TM2p	A2	Targeting	BRS3_+_135569956.23-P1P2	CTTAAGGTTTGCCCATTCCCCCACCTTGTTGGTTCCCTGTTGGGGAATCTTGTTTAAGAGCTAAGCTGACACCGTGGAAGCTATAACA
TM2p	A2	Targeting	BRS3_+_135570008.23-P1P2	CTTAAGGTTTGCCCATTCCCCCACCTTGTTGGCTGTCATAAGGAGAGGGAGGTTTAAGAGCTAAGCTGACACCGTGGAAGCTATAACA
TM2p	A2	Targeting	BRS3_+_135570036.23-P1P2	CTTAAGGTTTGCCCATTCCCCCACCTTGTTGGGTAGGAGGTGGAGTTTTATGTTTAAGAGCTAAGCTGACACCGTGGAAGCTATAACA
TM2p	A2	Targeting	BRS3_+_135570047.23-P1P2	CTTAAGGTTTGCCCATTCCCCCACCTTGTTGGGGCACTGAAGAGTAGGAGGGTTTAAGAGCTAAGCTGACACCGTGGAAGCTATAACA
TM2p	A2	Targeting	BRS3_-_135569679.23-P1P2	CTTAAGGTTTGCCCATTCCCCCACCTTGTTGGGACCTGAATGATCACTCCTGTTTAAGAGCTAAGCTGACACCGTGGAAGCTATAACA
TM2p	A2	Targeting	BRS3_-_135569839.23-P1P2	CTTAAGGTTTGCCCATTCCCCCACCTTGTTGGACTACCATGTGATTGCAGGGTTTAAGAGCTAAGCTGACACCGTGGAAGCTATAACA
TM2p	A2	Targeting	BRS3_-_135569894.23-P1P2	CTTAAGGTTTGCCCATTCCCCCACCTTGTTGGAACCTATATAGACCATCCTGTTTAAGAGCTAAGCTGACACCGTGGAAGCTATAACA
TM2p	A2	Targeting	BRS3_-_135569910.23-P1P2	CTTAAGGTTTGCCCATTCCCCCACCTTGTTGGCCTGGGTAGATATGAAAACGTTTAAGAGCTAAGCTGACACCGTGGAAGCTATAACA
TM2p	A2	Targeting	BRS3_-_135569975.23-P1P2	CTTAAGGTTTGCCCATTCCCCCACCTTGTTGGGTCCCAAGATTCCCCAACAGTTTAAGAGCTAAGCTGACACCGTGGAAGCTATAACA
TM2p	A2	Targeting	BSCL2_+_62473805.23-P1	CTTAAGGTTTGCCCATTCCCCCACCTTGTTGGCCTCCCACGGCTACAAAAGGTTTAAGAGCTAAGCTGACACCGTGGAAGCTATAACA
TM2p	A2	Targeting	BSCL2_+_62473838.23-P1	CTTAAGGTTTGCCCATTCCCCCACCTTGTTGGCCGTGCTGGACCCCGCCCTGTTTAAGAGCTAAGCTGACACCGTGGAAGCTATAACA
TM2p	A2	Targeting	BSCL2_+_62473885.23-P1	CTTAAGGTTTGCCCATTCCCCCACCTTGTTGGGCGACCTCGCAGCTCGGGAGTTTAAGAGCTAAGCTGACACCGTGGAAGCTATAACA
TM2p	A2	Targeting	BSCL2_+_62473912.23-P1	CTTAAGGTTTGCCCATTCCCCCACCTTGTTGGAGAGCCAGTGGCGAGCGCAGTTTAAGAGCTAAGCTGACACCGTGGAAGCTATAACA
TM2p	A2	Targeting	BSCL2_+_62473998.23-P1	CTTAAGGTTTGCCCATTCCCCCACCTTGTTGGTCCCCTGGGGCACATCTTGGTTTAAGAGCTAAGCTGACACCGTGGAAGCTATAACA
TM2p	A2	Targeting	BSCL2_+_62474010.23-P1	CTTAAGGTTTGCCCATTCCCCCACCTTGTTGGGCAGTCAGCGCATCCCCTGGTTTAAGAGCTAAGCTGACACCGTGGAAGCTATAACA
TM2p	A2	Targeting	BSCL2_+_62474070.23-P1	CTTAAGGTTTGCCCATTCCCCCACCTTGTTGGTGGTGAAGGTGTGCACGGAGTTTAAGAGCTAAGCTGACACCGTGGAAGCTATAACA
TM2p	A2	Targeting	BSCL2_+_62477065.23-P2	CTTAAGGTTTGCCCATTCCCCCACCTTGTTGGGGTACGGCCATCTTGGAATGTTTAAGAGCTAAGCTGACACCGTGGAAGCTATAACA
TM2p	A2	Targeting	BSCL2_+_62477099.23-P2	CTTAAGGTTTGCCCATTCCCCCACCTTGTTGGACGGTAAACTCCGTGACGTGTTTAAGAGCTAAGCTGACACCGTGGAAGCTATAACA
TM2p	A2	Targeting	BSCL2_+_62477145.23-P2	CTTAAGGTTTGCCCATTCCCCCACCTTGTTGGGAGAACGCCGGTTGCCTGGGTTTAAGAGCTAAGCTGACACCGTGGAAGCTATAACA
TM2p	A2	Targeting	BSCL2_+_62477156.23-P2	CTTAAGGTTTGCCCATTCCCCCACCTTGTTGGGGGACCATATTGAGAACGCGTTTAAGAGCTAAGCTGACACCGTGGAAGCTATAACA
TM2p	A2	Targeting	BSCL2_+_62477175.23-P2	CTTAAGGTTTGCCCATTCCCCCACCTTGTTGGAGACCAGAAGAGGGCGGAAGTTTAAGAGCTAAGCTGACACCGTGGAAGCTATAACA
TM2p	A2	Targeting	BSCL2_-_62473844.23-P1	CTTAAGGTTTGCCCATTCCCCCACCTTGTTGGGAGGCGGGGCTTCAGCCCAGTTTAAGAGCTAAGCTGACACCGTGGAAGCTATAACA
TM2p	A2	Targeting	BSCL2_-_62473868.23-P1	CTTAAGGTTTGCCCATTCCCCCACCTTGTTGGGGGTCCAGCACGGCGGGGCGTTTAAGAGCTAAGCTGACACCGTGGAAGCTATAACA
TM2p	A2	Targeting	BSCL2_-_62473929.23-P1	CTTAAGGTTTGCCCATTCCCCCACCTTGTTGGGTCTCCTTGCGCTCGCCACGTTTAAGAGCTAAGCTGACACCGTGGAAGCTATAACA
TM2p	A2	Targeting	BSCL2_-_62477093.23-P2	CTTAAGGTTTGCCCATTCCCCCACCTTGTTGGCAAGATGGCCGTACCAACAGTTTAAGAGCTAAGCTGACACCGTGGAAGCTATAACA
TM2p	A2	Targeting	BSCL2_-_62477110.23-P2	CTTAAGGTTTGCCCATTCCCCCACCTTGTTGGCATGGCAGCCCCCACGTCAGTTTAAGAGCTAAGCTGACACCGTGGAAGCTATAACA
TM2p	A2	Targeting	BSCL2_-_62477126.23-P2	CTTAAGGTTTGCCCATTCCCCCACCTTGTTGGTCACGGAGTTTACCGTACAGTTTAAGAGCTAAGCTGACACCGTGGAAGCTATAACA
TM2p	A2	Targeting	BSCL2_-_62477173.23-P2	CTTAAGGTTTGCCCATTCCCCCACCTTGTTGGGCAACCGGCGTTCTCAATAGTTTAAGAGCTAAGCTGACACCGTGGAAGCTATAACA
TM2p	A2	Targeting	BSCL2_-_62477204.23-P2	CTTAAGGTTTGCCCATTCCCCCACCTTGTTGGCCCTCTTCTGGTCTCAAAAGTTTAAGAGCTAAGCTGACACCGTGGAAGCTATAACA
TM2p	A2	Targeting	BTN2A2_+_26382777.23-P1P2	CTTAAGGTTTGCCCATTCCCCCACCTTGTTGGGAGATCCCCAAGGTGTCAGGTTTAAGAGCTAAGCTGACACCGTGGAAGCTATAACA
TM2p	A2	Targeting	BTN2A2_+_26383185.23-P1P2	CTTAAGGTTTGCCCATTCCCCCACCTTGTTGGCAAGCAGCAAATAACCTTTGTTTAAGAGCTAAGCTGACACCGTGGAAGCTATAACA
TM2p	A2	Targeting	BTN2A2_+_26383273.23-P1P2	CTTAAGGTTTGCCCATTCCCCCACCTTGTTGGGTGAGGCTGAACCAACCAAGTTTAAGAGCTAAGCTGACACCGTGGAAGCTATAACA
TM2p	A2	Targeting	BTN2A2_-_26383219.23-P1P2	CTTAAGGTTTGCCCATTCCCCCACCTTGTTGGTGCTGCTTGAGATTTTTGGGTTTAAGAGCTAAGCTGACACCGTGGAAGCTATAACA
TM2p	A2	Targeting	BTN2A2_-_26383279.23-P1P2	CTTAAGGTTTGCCCATTCCCCCACCTTGTTGGATAAGGCTCGAGACACCATGTTTAAGAGCTAAGCTGACACCGTGGAAGCTATAACA
TM2p	A2	Targeting	BTN2A2_-_26383283.23-P1P2	CTTAAGGTTTGCCCATTCCCCCACCTTGTTGGGGCTCGAGACACCATTGGTGTTTAAGAGCTAAGCTGACACCGTGGAAGCTATAACA
TM2p	A2	Targeting	BTN2A2_-_26383309.23-P1P2	CTTAAGGTTTGCCCATTCCCCCACCTTGTTGGGCCTCACTCGGCCAATCCTGTTTAAGAGCTAAGCTGACACCGTGGAAGCTATAACA
TM2p	A2	Targeting	BTN2A2_-_26383327.23-P1P2	CTTAAGGTTTGCCCATTCCCCCACCTTGTTGGTGGGCTCTAAACTGCTCAGGTTTAAGAGCTAAGCTGACACCGTGGAAGCTATAACA
TM2p	A2	Targeting	BTN2A2_-_26383406.23-P1P2	CTTAAGGTTTGCCCATTCCCCCACCTTGTTGGTCCAAACATCGCGATTAATGTTTAAGAGCTAAGCTGACACCGTGGAAGCTATAACA
TM2p	A2	Targeting	BTN2A2_-_26383409.23-P1P2	CTTAAGGTTTGCCCATTCCCCCACCTTGTTGGAAACATCGCGATTAATAGGGTTTAAGAGCTAAGCTGACACCGTGGAAGCTATAACA
TM2p	A2	Targeting	BVES_+_105585142.23-P1P2	CTTAAGGTTTGCCCATTCCCCCACCTTGTTGGAGGTGGGAAATCCTGGCCGGTTTAAGAGCTAAGCTGACACCGTGGAAGCTATAACA
TM2p	A2	Targeting	BVES_+_105585158.23-P1P2	CTTAAGGTTTGCCCATTCCCCCACCTTGTTGGCGGAGTCGCGGGAGCGAGGGTTTAAGAGCTAAGCTGACACCGTGGAAGCTATAACA
TM2p	A2	Targeting	BVES_+_105585169.23-P1P2	CTTAAGGTTTGCCCATTCCCCCACCTTGTTGGCAGACCCGCAGCGGAGTCGGTTTAAGAGCTAAGCTGACACCGTGGAAGCTATAACA
TM2p	A2	Targeting	BVES_+_105585177.23-P1P2	CTTAAGGTTTGCCCATTCCCCCACCTTGTTGGCGGGTGTGCAGACCCGCAGGTTTAAGAGCTAAGCTGACACCGTGGAAGCTATAACA
TM2p	A2	Targeting	BVES_+_105585195.23-P1P2	CTTAAGGTTTGCCCATTCCCCCACCTTGTTGGCGTTTCAAACCGAGTCCTCGTTTAAGAGCTAAGCTGACACCGTGGAAGCTATAACA
TM2p	A2	Targeting	BVES_+_105585497.23-P1P2	CTTAAGGTTTGCCCATTCCCCCACCTTGTTGGTCCCCCGCCACAATCGGACGTTTAAGAGCTAAGCTGACACCGTGGAAGCTATAACA
TM2p	A2	Targeting	BVES_-_105585185.23-P1P2	CTTAAGGTTTGCCCATTCCCCCACCTTGTTGGCGCTCCCGCGACTCCGCTGGTTTAAGAGCTAAGCTGACACCGTGGAAGCTATAACA
TM2p	A2	Targeting	BVES_-_105585297.23-P1P2	CTTAAGGTTTGCCCATTCCCCCACCTTGTTGGTGGGGGGCGGCAGTCTCGTGTTTAAGAGCTAAGCTGACACCGTGGAAGCTATAACA
TM2p	A2	Targeting	BVES_-_105585353.23-P1P2	CTTAAGGTTTGCCCATTCCCCCACCTTGTTGGAATTCGAGAAGTGCGGTCCGTTTAAGAGCTAAGCTGACACCGTGGAAGCTATAACA
TM2p	A2	Targeting	BVES_-_105585585.23-P1P2	CTTAAGGTTTGCCCATTCCCCCACCTTGTTGGCTCCTGCTGCGGAGGAAGAGTTTAAGAGCTAAGCTGACACCGTGGAAGCTATAACA
TM2p	A2	Targeting	C10orf111_+_15139555.23-P1P2	CTTAAGGTTTGCCCATTCCCCCACCTTGTTGGCTGGGCGGCCCAACCGGGAGTTTAAGAGCTAAGCTGACACCGTGGAAGCTATAACA
TM2p	A2	Targeting	C10orf111_+_15139559.23-P1P2	CTTAAGGTTTGCCCATTCCCCCACCTTGTTGGGGGACTGGGCGGCCCAACCGTTTAAGAGCTAAGCTGACACCGTGGAAGCTATAACA
TM2p	A2	Targeting	C10orf111_+_15139569.23-P1P2	CTTAAGGTTTGCCCATTCCCCCACCTTGTTGGCGCCCGGCCCGGGACTGGGGTTTAAGAGCTAAGCTGACACCGTGGAAGCTATAACA
TM2p	A2	Targeting	C10orf111_+_15139820.23-P1P2	CTTAAGGTTTGCCCATTCCCCCACCTTGTTGGGATCCCGCCGGTAGCCGAGGTTTAAGAGCTAAGCTGACACCGTGGAAGCTATAACA
TM2p	A2	Targeting	C10orf111_-_15139779.23-P1P2	CTTAAGGTTTGCCCATTCCCCCACCTTGTTGGCACCAAGGTACTCGATCCAGTTTAAGAGCTAAGCTGACACCGTGGAAGCTATAACA
TM2p	A2	Targeting	C10orf111_-_15139783.23-P1P2	CTTAAGGTTTGCCCATTCCCCCACCTTGTTGGAAGGTACTCGATCCAGGGGGTTTAAGAGCTAAGCTGACACCGTGGAAGCTATAACA
TM2p	A2	Targeting	C10orf111_-_15139795.23-P1P2	CTTAAGGTTTGCCCATTCCCCCACCTTGTTGGCCAGGGGCGGCGTGCAGTGGTTTAAGAGCTAAGCTGACACCGTGGAAGCTATAACA
TM2p	A2	Targeting	C10orf111_-_15139827.23-P1P2	CTTAAGGTTTGCCCATTCCCCCACCTTGTTGGTGGGTCGGCCGTCGCCCCTGTTTAAGAGCTAAGCTGACACCGTGGAAGCTATAACA
TM2p	A2	Targeting	C10orf111_-_15139837.23-P1P2	CTTAAGGTTTGCCCATTCCCCCACCTTGTTGGGTCGCCCCTCGGCTACCGGGTTTAAGAGCTAAGCTGACACCGTGGAAGCTATAACA
TM2p	A2	Targeting	C10orf111_-_15139851.23-P1P2	CTTAAGGTTTGCCCATTCCCCCACCTTGTTGGACCGGCGGGATCCAGAAACGTTTAAGAGCTAAGCTGACACCGTGGAAGCTATAACA
TM2p	A2	Targeting	C10orf128_+_50396536.23-P1P2	CTTAAGGTTTGCCCATTCCCCCACCTTGTTGGTTCAGCCCTGTCTTCAGAGGTTTAAGAGCTAAGCTGACACCGTGGAAGCTATAACA
TM2p	A2	Targeting	C10orf128_+_50396563.23-P1P2	CTTAAGGTTTGCCCATTCCCCCACCTTGTTGGGTGGAGTCCAGAATGACAGGTTTAAGAGCTAAGCTGACACCGTGGAAGCTATAACA
TM2p	A2	Targeting	C10orf128_+_50396606.23-P1P2	CTTAAGGTTTGCCCATTCCCCCACCTTGTTGGATACCCCAGCATGTACAATGTTTAAGAGCTAAGCTGACACCGTGGAAGCTATAACA
TM2p	A2	Targeting	C10orf128_+_50396645.23-P1P2	CTTAAGGTTTGCCCATTCCCCCACCTTGTTGGACTCTGTGGGGAAGATTATGTTTAAGAGCTAAGCTGACACCGTGGAAGCTATAACA
TM2p	A2	Targeting	C10orf128_-_50396489.23-P1P2	CTTAAGGTTTGCCCATTCCCCCACCTTGTTGGCAAGACCCACGTGACTGATGTTTAAGAGCTAAGCTGACACCGTGGAAGCTATAACA
TM2p	A2	Targeting	C10orf128_-_50396494.23-P1P2	CTTAAGGTTTGCCCATTCCCCCACCTTGTTGGCCCACGTGACTGATGGGGAGTTTAAGAGCTAAGCTGACACCGTGGAAGCTATAACA
TM2p	A2	Targeting	C10orf128_-_50396624.23-P1P2	CTTAAGGTTTGCCCATTCCCCCACCTTGTTGGAGACCCATTGTACATGCTGGTTTAAGAGCTAAGCTGACACCGTGGAAGCTATAACA
TM2p	A2	Targeting	C10orf128_-_50396683.23-P1P2	CTTAAGGTTTGCCCATTCCCCCACCTTGTTGGAGAGTGTGGGAACAAAGCTGTTTAAGAGCTAAGCTGACACCGTGGAAGCTATAACA
TM2p	A2	Targeting	C10orf128_-_50396693.23-P1P2	CTTAAGGTTTGCCCATTCCCCCACCTTGTTGGAACAAAGCTCGGTAAGGTGGTTTAAGAGCTAAGCTGACACCGTGGAAGCTATAACA
TM2p	A2	Targeting	C10orf128_-_50396741.23-P1P2	CTTAAGGTTTGCCCATTCCCCCACCTTGTTGGAAGTCTCAGAGAGGAATGTGTTTAAGAGCTAAGCTGACACCGTGGAAGCTATAACA
TM2p	A2	Targeting	C12orf55_+_96883158.23-P1P2	CTTAAGGTTTGCCCATTCCCCCACCTTGTTGGAATGTTCTGAGCAGAGCGCGTTTAAGAGCTAAGCTGACACCGTGGAAGCTATAACA
TM2p	A2	Targeting	C12orf55_+_96883206.23-P1P2	CTTAAGGTTTGCCCATTCCCCCACCTTGTTGGGCGTTGCCTGGTTGTGCGCGTTTAAGAGCTAAGCTGACACCGTGGAAGCTATAACA
TM2p	A2	Targeting	C12orf55_+_96883227.23-P1P2	CTTAAGGTTTGCCCATTCCCCCACCTTGTTGGAAAACAATGATGCTCCTGAGTTTAAGAGCTAAGCTGACACCGTGGAAGCTATAACA
TM2p	A2	Targeting	C12orf55_+_96883254.23-P1P2	CTTAAGGTTTGCCCATTCCCCCACCTTGTTGGGGCAGAGCGAGAAAGAACCGTTTAAGAGCTAAGCTGACACCGTGGAAGCTATAACA
TM2p	A2	Targeting	C12orf55_+_96883324.23-P1P2	CTTAAGGTTTGCCCATTCCCCCACCTTGTTGGTTGCCTGGCGACGGTCTCGGTTTAAGAGCTAAGCTGACACCGTGGAAGCTATAACA
TM2p	A2	Targeting	C12orf55_-_96883234.23-P1P2	CTTAAGGTTTGCCCATTCCCCCACCTTGTTGGACAACCAGGCAACGCCCTCGTTTAAGAGCTAAGCTGACACCGTGGAAGCTATAACA
TM2p	A2	Targeting	C12orf55_-_96883300.23-P1P2	CTTAAGGTTTGCCCATTCCCCCACCTTGTTGGCAGGGGCCGCTGTGTTTCTGTTTAAGAGCTAAGCTGACACCGTGGAAGCTATAACA
TM2p	A2	Targeting	C12orf55_-_96883320.23-P1P2	CTTAAGGTTTGCCCATTCCCCCACCTTGTTGGGGAATGCGCGCGGGATGCCGTTTAAGAGCTAAGCTGACACCGTGGAAGCTATAACA
TM2p	A2	Targeting	C12orf55_-_96883390.23-P1P2	CTTAAGGTTTGCCCATTCCCCCACCTTGTTGGGGGCCGGGGCGCGTCAATAGTTTAAGAGCTAAGCTGACACCGTGGAAGCTATAACA
TM2p	A2	Targeting	C12orf55_-_96883393.23-P1P2	CTTAAGGTTTGCCCATTCCCCCACCTTGTTGGCCGGGGCGCGTCAATATGGGTTTAAGAGCTAAGCTGACACCGTGGAAGCTATAACA
TM2p	A2	Targeting	C14orf180_+_105045701.23-P1	CTTAAGGTTTGCCCATTCCCCCACCTTGTTGGACCCAGCATGGGGCCTCCGGTTTAAGAGCTAAGCTGACACCGTGGAAGCTATAACA
TM2p	A2	Targeting	C14orf180_+_105045791.23-P1	CTTAAGGTTTGCCCATTCCCCCACCTTGTTGGTTGGAATTCGGGGCAGAGTGTTTAAGAGCTAAGCTGACACCGTGGAAGCTATAACA
TM2p	A2	Targeting	C14orf180_+_105046011.23-P1	CTTAAGGTTTGCCCATTCCCCCACCTTGTTGGTATAATTACCTCTCCCCTTGTTTAAGAGCTAAGCTGACACCGTGGAAGCTATAACA
TM2p	A2	Targeting	C14orf180_+_105047414.23-P2	CTTAAGGTTTGCCCATTCCCCCACCTTGTTGGGTAAGAGGGAGAACTTGTGGTTTAAGAGCTAAGCTGACACCGTGGAAGCTATAACA
TM2p	A2	Targeting	C14orf180_+_105047428.23-P2	CTTAAGGTTTGCCCATTCCCCCACCTTGTTGGCGTTCTCGACTTAAGTAAGGTTTAAGAGCTAAGCTGACACCGTGGAAGCTATAACA
TM2p	A2	Targeting	C14orf180_+_105047469.23-P2	CTTAAGGTTTGCCCATTCCCCCACCTTGTTGGCTCACCACTGGAACCACGCGTTTAAGAGCTAAGCTGACACCGTGGAAGCTATAACA
TM2p	A2	Targeting	C14orf180_+_105047505.23-P2	CTTAAGGTTTGCCCATTCCCCCACCTTGTTGGGGGCTCCTGGGAAAAGCCTGTTTAAGAGCTAAGCTGACACCGTGGAAGCTATAACA
TM2p	A2	Targeting	C14orf180_-_105045582.23-P1	CTTAAGGTTTGCCCATTCCCCCACCTTGTTGGCCTGCCAGGGCAATATCGAGTTTAAGAGCTAAGCTGACACCGTGGAAGCTATAACA
TM2p	A2	Targeting	C14orf180_-_105045739.23-P1	CTTAAGGTTTGCCCATTCCCCCACCTTGTTGGTGGGTCAGGGTCTTATTGGGTTTAAGAGCTAAGCTGACACCGTGGAAGCTATAACA
TM2p	A2	Targeting	C14orf180_-_105045857.23-P1	CTTAAGGTTTGCCCATTCCCCCACCTTGTTGGCACAGCTCTGGAATTGACCGTTTAAGAGCTAAGCTGACACCGTGGAAGCTATAACA
TM2p	A2	Targeting	C14orf180_-_105045862.23-P1	CTTAAGGTTTGCCCATTCCCCCACCTTGTTGGCTCTGGAATTGACCTGGGAGTTTAAGAGCTAAGCTGACACCGTGGAAGCTATAACA
TM2p	A2	Targeting	C14orf180_-_105045942.23-P1	CTTAAGGTTTGCCCATTCCCCCACCTTGTTGGATGGTCTGTTGTCCACCGGGTTTAAGAGCTAAGCTGACACCGTGGAAGCTATAACA
TM2p	A2	Targeting	C14orf180_-_105045994.23-P1	CTTAAGGTTTGCCCATTCCCCCACCTTGTTGGGGGCCAGCGGCCTGTCCTCGTTTAAGAGCTAAGCTGACACCGTGGAAGCTATAACA
TM2p	A2	Targeting	C14orf180_-_105046038.23-P1	CTTAAGGTTTGCCCATTCCCCCACCTTGTTGGGGGAGAGGTAATTATAGCCGTTTAAGAGCTAAGCTGACACCGTGGAAGCTATAACA
TM2p	A2	Targeting	C14orf180_-_105047282.23-P2	CTTAAGGTTTGCCCATTCCCCCACCTTGTTGGCGAGCCCTAACTGCACCTCGTTTAAGAGCTAAGCTGACACCGTGGAAGCTATAACA
TM2p	A2	Targeting	C14orf180_-_105047391.23-P2	CTTAAGGTTTGCCCATTCCCCCACCTTGTTGGGCACCTGAGCAAGCCCAGTGTTTAAGAGCTAAGCTGACACCGTGGAAGCTATAACA
TM2p	A2	Targeting	C14orf180_-_105047394.23-P2	CTTAAGGTTTGCCCATTCCCCCACCTTGTTGGCCTGAGCAAGCCCAGTGGGGTTTAAGAGCTAAGCTGACACCGTGGAAGCTATAACA
TM2p	A2	Targeting	C14orf180_-_105047410.23-P2	CTTAAGGTTTGCCCATTCCCCCACCTTGTTGGGGGCGGTCAGCCCAGCCAGGTTTAAGAGCTAAGCTGACACCGTGGAAGCTATAACA
TM2p	A2	Targeting	C14orf180_-_105047463.23-P2	CTTAAGGTTTGCCCATTCCCCCACCTTGTTGGCGAGAACGCATGTTGTCTGGTTTAAGAGCTAAGCTGACACCGTGGAAGCTATAACA
TM2p	A2	Targeting	C14orf180_-_105047496.23-P2	CTTAAGGTTTGCCCATTCCCCCACCTTGTTGGTGGTTCCAGTGGTGAGCGTGTTTAAGAGCTAAGCTGACACCGTGGAAGCTATAACA
TM2p	A2	Targeting	C14orf1_+_76127321.23-P1P2	CTTAAGGTTTGCCCATTCCCCCACCTTGTTGGCCGCTGATTGGCAGTAAAGGTTTAAGAGCTAAGCTGACACCGTGGAAGCTATAACA
TM2p	A2	Targeting	C14orf1_+_76127358.23-P1P2	CTTAAGGTTTGCCCATTCCCCCACCTTGTTGGGAGCGGCGTACCTGGGGAGGTTTAAGAGCTAAGCTGACACCGTGGAAGCTATAACA
TM2p	A2	Targeting	C14orf1_+_76127363.23-P1P2	CTTAAGGTTTGCCCATTCCCCCACCTTGTTGGGGCGTGAGCGGCGTACCTGGTTTAAGAGCTAAGCTGACACCGTGGAAGCTATAACA
TM2p	A2	Targeting	C14orf1_+_76127374.23-P1P2	CTTAAGGTTTGCCCATTCCCCCACCTTGTTGGGGAGGGCTTACGGCGTGAGGTTTAAGAGCTAAGCTGACACCGTGGAAGCTATAACA
TM2p	A2	Targeting	C14orf1_+_76127390.23-P1P2	CTTAAGGTTTGCCCATTCCCCCACCTTGTTGGTCCGCTAGGTCCAACAGGAGTTTAAGAGCTAAGCTGACACCGTGGAAGCTATAACA
TM2p	A2	Targeting	C14orf1_-_76127282.23-P1P2	CTTAAGGTTTGCCCATTCCCCCACCTTGTTGGCGTCAGTACTCTCTCTGATGTTTAAGAGCTAAGCTGACACCGTGGAAGCTATAACA
TM2p	A2	Targeting	C14orf1_-_76127314.23-P1P2	CTTAAGGTTTGCCCATTCCCCCACCTTGTTGGTTCGCCCGAGCAGGAGATGGTTTAAGAGCTAAGCTGACACCGTGGAAGCTATAACA
TM2p	A2	Targeting	C14orf1_-_76127369.23-P1P2	CTTAAGGTTTGCCCATTCCCCCACCTTGTTGGGCTGCCTAAGCCTCTCCCCGTTTAAGAGCTAAGCTGACACCGTGGAAGCTATAACA
TM2p	A2	Targeting	C14orf1_-_76127441.23-P1P2	CTTAAGGTTTGCCCATTCCCCCACCTTGTTGGTTTGGAGTCAACCTCTTAGGTTTAAGAGCTAAGCTGACACCGTGGAAGCTATAACA
TM2p	A2	Targeting	C14orf1_-_76127444.23-P1P2	CTTAAGGTTTGCCCATTCCCCCACCTTGTTGGGGAGTCAACCTCTTAGGGGGTTTAAGAGCTAAGCTGACACCGTGGAAGCTATAACA
TM2p	A2	Targeting	C15orf27_+_76351937.23-P1P2	CTTAAGGTTTGCCCATTCCCCCACCTTGTTGGCGAGCGTGTGGAGAGGCGAGTTTAAGAGCTAAGCTGACACCGTGGAAGCTATAACA
TM2p	A2	Targeting	C15orf27_+_76352008.23-P1P2	CTTAAGGTTTGCCCATTCCCCCACCTTGTTGGCGGGGCTGCCACGCAGAGCGTTTAAGAGCTAAGCTGACACCGTGGAAGCTATAACA
TM2p	A2	Targeting	C15orf27_+_76352079.23-P1P2	CTTAAGGTTTGCCCATTCCCCCACCTTGTTGGCCGCGGCGTCGGCTGGCAGGTTTAAGAGCTAAGCTGACACCGTGGAAGCTATAACA
TM2p	A2	Targeting	C15orf27_+_76352089.23-P1P2	CTTAAGGTTTGCCCATTCCCCCACCTTGTTGGGTCTAGGAAACCGCGGCGTGTTTAAGAGCTAAGCTGACACCGTGGAAGCTATAACA
TM2p	A2	Targeting	C15orf27_+_76352095.23-P1P2	CTTAAGGTTTGCCCATTCCCCCACCTTGTTGGGCGGCTGTCTAGGAAACCGGTTTAAGAGCTAAGCTGACACCGTGGAAGCTATAACA
TM2p	A2	Targeting	C15orf27_+_76352104.23-P1P2	CTTAAGGTTTGCCCATTCCCCCACCTTGTTGGAACGGCGGCGCGGCTGTCTGTTTAAGAGCTAAGCTGACACCGTGGAAGCTATAACA
TM2p	A2	Targeting	C15orf27_+_76352113.23-P1P2	CTTAAGGTTTGCCCATTCCCCCACCTTGTTGGAGGCTGCGGAACGGCGGCGGTTTAAGAGCTAAGCTGACACCGTGGAAGCTATAACA
TM2p	A2	Targeting	C15orf27_+_76352219.23-P1P2	CTTAAGGTTTGCCCATTCCCCCACCTTGTTGGCCTCCGCCCACCGCGCTCGGTTTAAGAGCTAAGCTGACACCGTGGAAGCTATAACA
TM2p	A2	Targeting	C15orf27_-_76352230.23-P1P2	CTTAAGGTTTGCCCATTCCCCCACCTTGTTGGTCGCGCGCGCCCCCGAGCGGTTTAAGAGCTAAGCTGACACCGTGGAAGCTATAACA
TM2p	A2	Targeting	C15orf27_-_76352234.23-P1P2	CTTAAGGTTTGCCCATTCCCCCACCTTGTTGGGCGCGCCCCCGAGCGCGGTGTTTAAGAGCTAAGCTGACACCGTGGAAGCTATAACA
TM2p	A2	Targeting	C16orf52_+_22019243.23-P1P2	CTTAAGGTTTGCCCATTCCCCCACCTTGTTGGGACCCGGACCCGACCGGCCGTTTAAGAGCTAAGCTGACACCGTGGAAGCTATAACA
TM2p	A2	Targeting	C16orf52_+_22019248.23-P1P2	CTTAAGGTTTGCCCATTCCCCCACCTTGTTGGTTCTGGACCCGGACCCGACGTTTAAGAGCTAAGCTGACACCGTGGAAGCTATAACA
TM2p	A2	Targeting	C16orf52_+_22019258.23-P1P2	CTTAAGGTTTGCCCATTCCCCCACCTTGTTGGCGCCTCTACGTTCTGGACCGTTTAAGAGCTAAGCTGACACCGTGGAAGCTATAACA
TM2p	A2	Targeting	C16orf52_+_22019297.23-P1P2	CTTAAGGTTTGCCCATTCCCCCACCTTGTTGGCGGCTCGGCCGGCCGCCCTGTTTAAGAGCTAAGCTGACACCGTGGAAGCTATAACA
TM2p	A2	Targeting	C16orf52_+_22019352.23-P1P2	CTTAAGGTTTGCCCATTCCCCCACCTTGTTGGGCGTTGGCGAGGCCGGTCCGTTTAAGAGCTAAGCTGACACCGTGGAAGCTATAACA
TM2p	A2	Targeting	C16orf52_+_22019367.23-P1P2	CTTAAGGTTTGCCCATTCCCCCACCTTGTTGGGGAAGCGAAGCCGCGGCGTGTTTAAGAGCTAAGCTGACACCGTGGAAGCTATAACA
TM2p	A2	Targeting	C16orf52_-_22019199.23-P1P2	CTTAAGGTTTGCCCATTCCCCCACCTTGTTGGTGGGCAGAAAGCCAAGAGGGTTTAAGAGCTAAGCTGACACCGTGGAAGCTATAACA
TM2p	A2	Targeting	C16orf52_-_22019277.23-P1P2	CTTAAGGTTTGCCCATTCCCCCACCTTGTTGGGTCCGGGTCCAGAACGTAGGTTTAAGAGCTAAGCTGACACCGTGGAAGCTATAACA
TM2p	A2	Targeting	C16orf52_-_22019335.23-P1P2	CTTAAGGTTTGCCCATTCCCCCACCTTGTTGGAGCCGGGAGGACGGAGCTGGTTTAAGAGCTAAGCTGACACCGTGGAAGCTATAACA
TM2p	A2	Targeting	C16orf52_-_22019425.23-P1P2	CTTAAGGTTTGCCCATTCCCCCACCTTGTTGGGGGCCGAGCAGTTCCGGGGGTTTAAGAGCTAAGCTGACACCGTGGAAGCTATAACA
TM2p	A2	Targeting	C16orf58_+_31519850.23-P1P2	CTTAAGGTTTGCCCATTCCCCCACCTTGTTGGTCCGAAGCAGCGCCGAGGCGTTTAAGAGCTAAGCTGACACCGTGGAAGCTATAACA
TM2p	A2	Targeting	C16orf58_+_31519854.23-P1P2	CTTAAGGTTTGCCCATTCCCCCACCTTGTTGGGGCGTCCGAAGCAGCGCCGGTTTAAGAGCTAAGCTGACACCGTGGAAGCTATAACA
TM2p	A2	Targeting	C16orf58_+_31519886.23-P1P2	CTTAAGGTTTGCCCATTCCCCCACCTTGTTGGGAATGCTACAAAGCAACGGGTTTAAGAGCTAAGCTGACACCGTGGAAGCTATAACA
TM2p	A2	Targeting	C16orf58_+_31519934.23-P1P2	CTTAAGGTTTGCCCATTCCCCCACCTTGTTGGTCTCGAACACAACTGGCGGGTTTAAGAGCTAAGCTGACACCGTGGAAGCTATAACA
TM2p	A2	Targeting	C16orf58_+_31519937.23-P1P2	CTTAAGGTTTGCCCATTCCCCCACCTTGTTGGGCGTCTCGAACACAACTGGGTTTAAGAGCTAAGCTGACACCGTGGAAGCTATAACA
TM2p	A2	Targeting	C16orf58_+_31520017.23-P1P2	CTTAAGGTTTGCCCATTCCCCCACCTTGTTGGACAGCAAAAAAGGCACCTGGTTTAAGAGCTAAGCTGACACCGTGGAAGCTATAACA
TM2p	A2	Targeting	C16orf58_-_31519757.23-P1P2	CTTAAGGTTTGCCCATTCCCCCACCTTGTTGGACGTGGCAGGCGGCACTTCGTTTAAGAGCTAAGCTGACACCGTGGAAGCTATAACA
TM2p	A2	Targeting	C16orf58_-_31519762.23-P1P2	CTTAAGGTTTGCCCATTCCCCCACCTTGTTGGGCAGGCGGCACTTCCGGCTGTTTAAGAGCTAAGCTGACACCGTGGAAGCTATAACA
TM2p	A2	Targeting	C16orf58_-_31519853.23-P1P2	CTTAAGGTTTGCCCATTCCCCCACCTTGTTGGAACTGACTGTCGCTCTCTCGTTTAAGAGCTAAGCTGACACCGTGGAAGCTATAACA
TM2p	A2	Targeting	C16orf58_-_31519885.23-P1P2	CTTAAGGTTTGCCCATTCCCCCACCTTGTTGGGCTTCGGACGCCCCGGCACGTTTAAGAGCTAAGCTGACACCGTGGAAGCTATAACA
TM2p	A2	Targeting	C17orf62_+_80408570.23-P1P2	CTTAAGGTTTGCCCATTCCCCCACCTTGTTGGGGACCGCTGTGCTCTCGGTGTTTAAGAGCTAAGCTGACACCGTGGAAGCTATAACA
TM2p	A2	Targeting	C17orf62_+_80408661.23-P1P2	CTTAAGGTTTGCCCATTCCCCCACCTTGTTGGCCGCCCCCGAAAGTCGGCTGTTTAAGAGCTAAGCTGACACCGTGGAAGCTATAACA
TM2p	A2	Targeting	C17orf62_+_80408666.23-P1P2	CTTAAGGTTTGCCCATTCCCCCACCTTGTTGGCGGCCCCGCCCCCGAAAGTGTTTAAGAGCTAAGCTGACACCGTGGAAGCTATAACA
TM2p	A2	Targeting	C17orf62_+_80408772.23-P1P2	CTTAAGGTTTGCCCATTCCCCCACCTTGTTGGCGGATCCCGGAAATCCGCTGTTTAAGAGCTAAGCTGACACCGTGGAAGCTATAACA
TM2p	A2	Targeting	C17orf62_+_80408801.23-P1P2	CTTAAGGTTTGCCCATTCCCCCACCTTGTTGGAACCACCCGCCTCCTCCTGGTTTAAGAGCTAAGCTGACACCGTGGAAGCTATAACA
TM2p	A2	Targeting	C17orf62_-_80408658.23-P1P2	CTTAAGGTTTGCCCATTCCCCCACCTTGTTGGCGCACTTCCGGGATTGGAGGTTTAAGAGCTAAGCTGACACCGTGGAAGCTATAACA
TM2p	A2	Targeting	C17orf62_-_80408679.23-P1P2	CTTAAGGTTTGCCCATTCCCCCACCTTGTTGGGAGCCGAGCCGACTTTCGGGTTTAAGAGCTAAGCTGACACCGTGGAAGCTATAACA
TM2p	A2	Targeting	C17orf62_-_80408709.23-P1P2	CTTAAGGTTTGCCCATTCCCCCACCTTGTTGGCGCGCGCTTCCGGGATTGGGTTTAAGAGCTAAGCTGACACCGTGGAAGCTATAACA
TM2p	A2	Targeting	C17orf62_-_80408741.23-P1P2	CTTAAGGTTTGCCCATTCCCCCACCTTGTTGGCGCGCTTACGGGATTGGGGGTTTAAGAGCTAAGCTGACACCGTGGAAGCTATAACA
TM2p	A2	Targeting	C17orf62_-_80408764.23-P1P2	CTTAAGGTTTGCCCATTCCCCCACCTTGTTGGGCCGCAAGCATTTCCTGGAGTTTAAGAGCTAAGCTGACACCGTGGAAGCTATAACA
TM2p	A2	Targeting	C1orf101_+_244624491.23-P1P2	CTTAAGGTTTGCCCATTCCCCCACCTTGTTGGAACCTGCACACGAGATTTTGTTTAAGAGCTAAGCTGACACCGTGGAAGCTATAACA
TM2p	A2	Targeting	C1orf101_+_244624545.23-P1P2	CTTAAGGTTTGCCCATTCCCCCACCTTGTTGGCGCGTGCGCGCCGCTACCTGTTTAAGAGCTAAGCTGACACCGTGGAAGCTATAACA
TM2p	A2	Targeting	C1orf101_+_244624582.23-P1P2	CTTAAGGTTTGCCCATTCCCCCACCTTGTTGGCGGGCCTGAAGACCAGCGAGTTTAAGAGCTAAGCTGACACCGTGGAAGCTATAACA
TM2p	A2	Targeting	C1orf101_+_244624600.23-P1P2	CTTAAGGTTTGCCCATTCCCCCACCTTGTTGGCCTCTGGACAGGGCGGGCCGTTTAAGAGCTAAGCTGACACCGTGGAAGCTATAACA
TM2p	A2	Targeting	C1orf101_+_244624610.23-P1P2	CTTAAGGTTTGCCCATTCCCCCACCTTGTTGGGGTCCCGGCGCCTCTGGACGTTTAAGAGCTAAGCTGACACCGTGGAAGCTATAACA
TM2p	A2	Targeting	C1orf101_+_244624664.23-P1P2	CTTAAGGTTTGCCCATTCCCCCACCTTGTTGGAGGCCTCGCGCATTCCCGTGTTTAAGAGCTAAGCTGACACCGTGGAAGCTATAACA
TM2p	A2	Targeting	C1orf101_-_244624522.23-P1P2	CTTAAGGTTTGCCCATTCCCCCACCTTGTTGGCGTGTGCAGGTTCGCACTCGTTTAAGAGCTAAGCTGACACCGTGGAAGCTATAACA
TM2p	A2	Targeting	C1orf101_-_244624533.23-P1P2	CTTAAGGTTTGCCCATTCCCCCACCTTGTTGGTCGCACTCCGGCTACTTTCGTTTAAGAGCTAAGCTGACACCGTGGAAGCTATAACA
TM2p	A2	Targeting	C1orf101_-_244624627.23-P1P2	CTTAAGGTTTGCCCATTCCCCCACCTTGTTGGCCGCCCTGTCCAGAGGCGCGTTTAAGAGCTAAGCTGACACCGTGGAAGCTATAACA
TM2p	A2	Targeting	C1orf101_-_244624671.23-P1P2	CTTAAGGTTTGCCCATTCCCCCACCTTGTTGGCGCCGGGCCGACGTCCCACGTTTAAGAGCTAAGCTGACACCGTGGAAGCTATAACA
TM2p	A2	Targeting	C1orf27_+_186344440.23-P1P2	CTTAAGGTTTGCCCATTCCCCCACCTTGTTGGTGGGTGCGCAAGAGGATCAGTTTAAGAGCTAAGCTGACACCGTGGAAGCTATAACA
TM2p	A2	Targeting	C1orf27_+_186344746.23-P1P2	CTTAAGGTTTGCCCATTCCCCCACCTTGTTGGCGGGACCGATGCCCTCTAGGTTTAAGAGCTAAGCTGACACCGTGGAAGCTATAACA
TM2p	A2	Targeting	C1orf27_+_186344774.23-P1P2	CTTAAGGTTTGCCCATTCCCCCACCTTGTTGGTATCCCGGAGCCTGCCGTCGTTTAAGAGCTAAGCTGACACCGTGGAAGCTATAACA
TM2p	A2	Targeting	C1orf27_-_186344791.23-P1P2	CTTAAGGTTTGCCCATTCCCCCACCTTGTTGGAGGGCCGGACGGCAGGCTCGTTTAAGAGCTAAGCTGACACCGTGGAAGCTATAACA
TM2p	A2	Targeting	C1orf27_-_186344813.23-P1P2	CTTAAGGTTTGCCCATTCCCCCACCTTGTTGGGATACCGCCACGCTCTCTAGTTTAAGAGCTAAGCTGACACCGTGGAAGCTATAACA
TM2p	A2	Targeting	C1orf27_-_186344825.23-P1P2	CTTAAGGTTTGCCCATTCCCCCACCTTGTTGGCTCTCTATGGCGCCCAGAAGTTTAAGAGCTAAGCTGACACCGTGGAAGCTATAACA
TM2p	A2	Targeting	C1orf27_-_186344830.23-P1P2	CTTAAGGTTTGCCCATTCCCCCACCTTGTTGGTATGGCGCCCAGAAGGGGGGTTTAAGAGCTAAGCTGACACCGTGGAAGCTATAACA
TM2p	A2	Targeting	C1orf27_-_186344853.23-P1P2	CTTAAGGTTTGCCCATTCCCCCACCTTGTTGGGTGGCGACCGCAGTCGCTTGTTTAAGAGCTAAGCTGACACCGTGGAAGCTATAACA
TM2p	A2	Targeting	C1orf27_-_186344859.23-P1P2	CTTAAGGTTTGCCCATTCCCCCACCTTGTTGGACCGCAGTCGCTTTGGCTGGTTTAAGAGCTAAGCTGACACCGTGGAAGCTATAACA
TM2p	A2	Targeting	C1orf27_-_186344874.23-P1P2	CTTAAGGTTTGCCCATTCCCCCACCTTGTTGGGCTGAGGCTCTGCGGGGAAGTTTAAGAGCTAAGCTGACACCGTGGAAGCTATAACA
TM2p	A2	Targeting	C1orf95_+_226736178.23-P1P2	CTTAAGGTTTGCCCATTCCCCCACCTTGTTGGACCACGAAGCCCTGCGAACGTTTAAGAGCTAAGCTGACACCGTGGAAGCTATAACA
TM2p	A2	Targeting	C1orf95_+_226736207.23-P1P2	CTTAAGGTTTGCCCATTCCCCCACCTTGTTGGCCTCCCAGACAGGTGAACTGTTTAAGAGCTAAGCTGACACCGTGGAAGCTATAACA
TM2p	A2	Targeting	C1orf95_+_226736270.23-P1P2	CTTAAGGTTTGCCCATTCCCCCACCTTGTTGGAGTGGAAGAGGACCGCAAAGTTTAAGAGCTAAGCTGACACCGTGGAAGCTATAACA
TM2p	A2	Targeting	C1orf95_+_226736281.23-P1P2	CTTAAGGTTTGCCCATTCCCCCACCTTGTTGGGGAGGGAAAGCAGTGGAAGGTTTAAGAGCTAAGCTGACACCGTGGAAGCTATAACA
TM2p	A2	Targeting	C1orf95_+_226736314.23-P1P2	CTTAAGGTTTGCCCATTCCCCCACCTTGTTGGAACCACCGCTCACAAGGAAGTTTAAGAGCTAAGCTGACACCGTGGAAGCTATAACA
TM2p	A2	Targeting	C1orf95_+_226736421.23-P1P2	CTTAAGGTTTGCCCATTCCCCCACCTTGTTGGTCCCCACACGCCCGGCGGAGTTTAAGAGCTAAGCTGACACCGTGGAAGCTATAACA
TM2p	A2	Targeting	C1orf95_+_226736494.23-P1P2	CTTAAGGTTTGCCCATTCCCCCACCTTGTTGGGCTCCGCGCCGAGCTCAGGGTTTAAGAGCTAAGCTGACACCGTGGAAGCTATAACA
TM2p	A2	Targeting	C1orf95_-_226736190.23-P1P2	CTTAAGGTTTGCCCATTCCCCCACCTTGTTGGCACACACTCCCAGTTCGCAGTTTAAGAGCTAAGCTGACACCGTGGAAGCTATAACA
TM2p	A2	Targeting	C1orf95_-_226736345.23-P1P2	CTTAAGGTTTGCCCATTCCCCCACCTTGTTGGTGAGCGGTGGTTTTGGTTGGTTTAAGAGCTAAGCTGACACCGTGGAAGCTATAACA
TM2p	A2	Targeting	C1orf95_-_226736399.23-P1P2	CTTAAGGTTTGCCCATTCCCCCACCTTGTTGGGGCGTCAGAGCGCTGTCACGTTTAAGAGCTAAGCTGACACCGTGGAAGCTATAACA
TM2p	A2	Targeting	C20orf141_+_2795381.23-P1P2	CTTAAGGTTTGCCCATTCCCCCACCTTGTTGGTACTTGGGCATCTGTCCAAGTTTAAGAGCTAAGCTGACACCGTGGAAGCTATAACA
TM2p	A2	Targeting	C20orf141_+_2795420.23-P1P2	CTTAAGGTTTGCCCATTCCCCCACCTTGTTGGGGGATCTGAGTTGTCAGGAGTTTAAGAGCTAAGCTGACACCGTGGAAGCTATAACA
TM2p	A2	Targeting	C20orf141_+_2795424.23-P1P2	CTTAAGGTTTGCCCATTCCCCCACCTTGTTGGCTTGGGGATCTGAGTTGTCGTTTAAGAGCTAAGCTGACACCGTGGAAGCTATAACA
TM2p	A2	Targeting	C20orf141_+_2795440.23-P1P2	CTTAAGGTTTGCCCATTCCCCCACCTTGTTGGTGCCCTAGGGCCCTCCCTTGTTTAAGAGCTAAGCTGACACCGTGGAAGCTATAACA
TM2p	A2	Targeting	C20orf141_-_2795304.23-P1P2	CTTAAGGTTTGCCCATTCCCCCACCTTGTTGGGACCCACAGGGAAGACAGCGTTTAAGAGCTAAGCTGACACCGTGGAAGCTATAACA
TM2p	A2	Targeting	C20orf141_-_2795359.23-P1P2	CTTAAGGTTTGCCCATTCCCCCACCTTGTTGGTGCAGCTCTGCAAACTCACGTTTAAGAGCTAAGCTGACACCGTGGAAGCTATAACA
TM2p	A2	Targeting	C20orf141_-_2795387.23-P1P2	CTTAAGGTTTGCCCATTCCCCCACCTTGTTGGAAAGCAGACCTCGCTCCCTGTTTAAGAGCTAAGCTGACACCGTGGAAGCTATAACA
TM2p	A2	Targeting	C20orf141_-_2795410.23-P1P2	CTTAAGGTTTGCCCATTCCCCCACCTTGTTGGCAGATGCCCAAGTAGTAATGTTTAAGAGCTAAGCTGACACCGTGGAAGCTATAACA
TM2p	A2	Targeting	C20orf141_-_2795451.23-P1P2	CTTAAGGTTTGCCCATTCCCCCACCTTGTTGGAACTCAGATCCCCAAGGGAGTTTAAGAGCTAAGCTGACACCGTGGAAGCTATAACA
TM2p	A2	Targeting	C20orf141_-_2795476.23-P1P2	CTTAAGGTTTGCCCATTCCCCCACCTTGTTGGTAGGGCAGAGAATCAGCAAGTTTAAGAGCTAAGCTGACACCGTGGAAGCTATAACA
TM2p	A2	Targeting	C20orf24_+_35233864.23-P1P2	CTTAAGGTTTGCCCATTCCCCCACCTTGTTGGGCCCCTCGAGCAGCGAGTGGTTTAAGAGCTAAGCTGACACCGTGGAAGCTATAACA
TM2p	A2	Targeting	C20orf24_+_35233974.23-P1P2	CTTAAGGTTTGCCCATTCCCCCACCTTGTTGGAGGGACAATCTTGGTAGAAGTTTAAGAGCTAAGCTGACACCGTGGAAGCTATAACA
TM2p	A2	Targeting	C20orf24_+_35233982.23-P1P2	CTTAAGGTTTGCCCATTCCCCCACCTTGTTGGGTGAGGGGAGGGACAATCTGTTTAAGAGCTAAGCTGACACCGTGGAAGCTATAACA
TM2p	A2	Targeting	C20orf24_+_35233998.23-P1P2	CTTAAGGTTTGCCCATTCCCCCACCTTGTTGGGGGCTCGCGGTAAGGTGTGGTTTAAGAGCTAAGCTGACACCGTGGAAGCTATAACA
TM2p	A2	Targeting	C20orf24_+_35234010.23-P1P2	CTTAAGGTTTGCCCATTCCCCCACCTTGTTGGTCAGCATCCGCCGGGCTCGGTTTAAGAGCTAAGCTGACACCGTGGAAGCTATAACA
TM2p	A2	Targeting	C20orf24_+_35234040.23-P1P2	CTTAAGGTTTGCCCATTCCCCCACCTTGTTGGGCAAGCGCGCTACTCGTGGGTTTAAGAGCTAAGCTGACACCGTGGAAGCTATAACA
TM2p	A2	Targeting	C20orf24_+_35234043.23-P1P2	CTTAAGGTTTGCCCATTCCCCCACCTTGTTGGGGCGCAAGCGCGCTACTCGGTTTAAGAGCTAAGCTGACACCGTGGAAGCTATAACA
TM2p	A2	Targeting	C20orf24_-_35233883.23-P1P2	CTTAAGGTTTGCCCATTCCCCCACCTTGTTGGTGCCCCACTCGCTGCTCGAGTTTAAGAGCTAAGCTGACACCGTGGAAGCTATAACA
TM2p	A2	Targeting	C20orf24_-_35234090.23-P1P2	CTTAAGGTTTGCCCATTCCCCCACCTTGTTGGCGCCGGTCGCTGTTTCACTGTTTAAGAGCTAAGCTGACACCGTGGAAGCTATAACA
TM2p	A2	Targeting	C20orf24_-_35234113.23-P1P2	CTTAAGGTTTGCCCATTCCCCCACCTTGTTGGTGGCTTCGCGGTCGCCGATGTTTAAGAGCTAAGCTGACACCGTGGAAGCTATAACA
TM2p	A2	Targeting	C3AR1_+_8219018.23-P1P2	CTTAAGGTTTGCCCATTCCCCCACCTTGTTGGATAAGACTTAACTTATTGCGTTTAAGAGCTAAGCTGACACCGTGGAAGCTATAACA
TM2p	A2	Targeting	C3AR1_+_8219048.23-P1P2	CTTAAGGTTTGCCCATTCCCCCACCTTGTTGGTTCCTGTGAGGTCAGATAGGTTTAAGAGCTAAGCTGACACCGTGGAAGCTATAACA
TM2p	A2	Targeting	C3AR1_+_8219189.23-P1P2	CTTAAGGTTTGCCCATTCCCCCACCTTGTTGGAGTTGAACCCTATGTACAGGTTTAAGAGCTAAGCTGACACCGTGGAAGCTATAACA
TM2p	A2	Targeting	C3AR1_-_8219067.23-P1P2	CTTAAGGTTTGCCCATTCCCCCACCTTGTTGGGACCACTATCTGACCTCACGTTTAAGAGCTAAGCTGACACCGTGGAAGCTATAACA
TM2p	A2	Targeting	C3AR1_-_8219117.23-P1P2	CTTAAGGTTTGCCCATTCCCCCACCTTGTTGGTGGCTTAGAAAGGCAAAGCGTTTAAGAGCTAAGCTGACACCGTGGAAGCTATAACA
TM2p	A2	Targeting	C3AR1_-_8219186.23-P1P2	CTTAAGGTTTGCCCATTCCCCCACCTTGTTGGCAGAGAATGGTTAGAGAGAGTTTAAGAGCTAAGCTGACACCGTGGAAGCTATAACA
TM2p	A2	Targeting	C3AR1_-_8219202.23-P1P2	CTTAAGGTTTGCCCATTCCCCCACCTTGTTGGAGAGGGTACCTCTGTACATGTTTAAGAGCTAAGCTGACACCGTGGAAGCTATAACA
TM2p	A2	Targeting	C3AR1_-_8219217.23-P1P2	CTTAAGGTTTGCCCATTCCCCCACCTTGTTGGACATAGGGTTCAACTTTATGTTTAAGAGCTAAGCTGACACCGTGGAAGCTATAACA
TM2p	A2	Targeting	C3AR1_-_8219262.23-P1P2	CTTAAGGTTTGCCCATTCCCCCACCTTGTTGGAAGACTCTATGAGATGTGAGTTTAAGAGCTAAGCTGACACCGTGGAAGCTATAACA
TM2p	A2	Targeting	C3AR1_-_8219283.23-P1P2	CTTAAGGTTTGCCCATTCCCCCACCTTGTTGGGTTGGAGTGGGGAGTGGTTGTTTAAGAGCTAAGCTGACACCGTGGAAGCTATAACA
TM2p	A2	Targeting	C3orf52_+_111805059.23-P1P2	CTTAAGGTTTGCCCATTCCCCCACCTTGTTGGCCGCGGGGTAGAGCACCTGGTTTAAGAGCTAAGCTGACACCGTGGAAGCTATAACA
TM2p	A2	Targeting	C3orf52_+_111805073.23-P1P2	CTTAAGGTTTGCCCATTCCCCCACCTTGTTGGCCACTCCCTGGATCCCGCGGTTTAAGAGCTAAGCTGACACCGTGGAAGCTATAACA
TM2p	A2	Targeting	C3orf52_+_111805084.23-P1P2	CTTAAGGTTTGCCCATTCCCCCACCTTGTTGGGTGAGTGGCGGCCACTCCCGTTTAAGAGCTAAGCTGACACCGTGGAAGCTATAACA
TM2p	A2	Targeting	C3orf52_+_111805098.23-P1P2	CTTAAGGTTTGCCCATTCCCCCACCTTGTTGGCAGGAGGGGCAACTGTGAGGTTTAAGAGCTAAGCTGACACCGTGGAAGCTATAACA
TM2p	A2	Targeting	C3orf52_+_111805112.23-P1P2	CTTAAGGTTTGCCCATTCCCCCACCTTGTTGGCGGACCGGAGCGGACAGGAGTTTAAGAGCTAAGCTGACACCGTGGAAGCTATAACA
TM2p	A2	Targeting	C3orf52_+_111805116.23-P1P2	CTTAAGGTTTGCCCATTCCCCCACCTTGTTGGGGAGCGGACCGGAGCGGACGTTTAAGAGCTAAGCTGACACCGTGGAAGCTATAACA
TM2p	A2	Targeting	C3orf52_+_111805140.23-P1P2	CTTAAGGTTTGCCCATTCCCCCACCTTGTTGGGGGCGTCGCGGACCTCGGGGTTTAAGAGCTAAGCTGACACCGTGGAAGCTATAACA
TM2p	A2	Targeting	C3orf52_+_111805161.23-P1P2	CTTAAGGTTTGCCCATTCCCCCACCTTGTTGGTCACACTCCACCCACTGGGGTTTAAGAGCTAAGCTGACACCGTGGAAGCTATAACA
TM2p	A2	Targeting	C3orf52_+_111805229.23-P1P2	CTTAAGGTTTGCCCATTCCCCCACCTTGTTGGCCGGCAGGGAAAGTCTGAGGTTTAAGAGCTAAGCTGACACCGTGGAAGCTATAACA
TM2p	A2	Targeting	C3orf52_-_111805172.23-P1P2	CTTAAGGTTTGCCCATTCCCCCACCTTGTTGGCCGCGACGCCCCGCCCAGTGTTTAAGAGCTAAGCTGACACCGTGGAAGCTATAACA
TM2p	A2	Targeting	C5AR1_+_47812918.23-P1P2	CTTAAGGTTTGCCCATTCCCCCACCTTGTTGGGCCGGCGCTCGGAAAACCGGTTTAAGAGCTAAGCTGACACCGTGGAAGCTATAACA
TM2p	A2	Targeting	C5AR1_+_47812928.23-P1P2	CTTAAGGTTTGCCCATTCCCCCACCTTGTTGGGAGAAGGGGGGCCGGCGCTGTTTAAGAGCTAAGCTGACACCGTGGAAGCTATAACA
TM2p	A2	Targeting	C5AR1_+_47813008.23-P1P2	CTTAAGGTTTGCCCATTCCCCCACCTTGTTGGGTCTGCACACTGGGCACTGGTTTAAGAGCTAAGCTGACACCGTGGAAGCTATAACA
TM2p	A2	Targeting	C5AR1_+_47813016.23-P1P2	CTTAAGGTTTGCCCATTCCCCCACCTTGTTGGTCTCATTGGTCTGCACACTGTTTAAGAGCTAAGCTGACACCGTGGAAGCTATAACA
TM2p	A2	Targeting	C5AR1_+_47813029.23-P1P2	CTTAAGGTTTGCCCATTCCCCCACCTTGTTGGTTCTCTCTGGGGCTCTCATGTTTAAGAGCTAAGCTGACACCGTGGAAGCTATAACA
TM2p	A2	Targeting	C5AR1_-_47812875.23-P1P2	CTTAAGGTTTGCCCATTCCCCCACCTTGTTGGAGAAGAGATGGCCCCAAATGTTTAAGAGCTAAGCTGACACCGTGGAAGCTATAACA
TM2p	A2	Targeting	C5AR1_-_47812912.23-P1P2	CTTAAGGTTTGCCCATTCCCCCACCTTGTTGGAGAGGGGCCGAGCCTGCACGTTTAAGAGCTAAGCTGACACCGTGGAAGCTATAACA
TM2p	A2	Targeting	C5AR1_-_47812981.23-P1P2	CTTAAGGTTTGCCCATTCCCCCACCTTGTTGGGAGGTGGTTAGAGTCCCCTGTTTAAGAGCTAAGCTGACACCGTGGAAGCTATAACA
TM2p	A2	Targeting	C5AR1_-_47812999.23-P1P2	CTTAAGGTTTGCCCATTCCCCCACCTTGTTGGTGGGTGTGTGCCCCGCAGAGTTTAAGAGCTAAGCTGACACCGTGGAAGCTATAACA
TM2p	A2	Targeting	C5AR1_-_47813085.23-P1P2	CTTAAGGTTTGCCCATTCCCCCACCTTGTTGGCTCCCTGCATCTTCCCTTGGTTTAAGAGCTAAGCTGACACCGTGGAAGCTATAACA
TM2p	A2	Targeting	C5AR2_+_47835227.23-P1	CTTAAGGTTTGCCCATTCCCCCACCTTGTTGGTCTCGAAGTCCCACCTTCCGTTTAAGAGCTAAGCTGACACCGTGGAAGCTATAACA
TM2p	A2	Targeting	C5AR2_+_47835273.23-P1	CTTAAGGTTTGCCCATTCCCCCACCTTGTTGGGAGGGCTCGGTTGGGTGGAGTTTAAGAGCTAAGCTGACACCGTGGAAGCTATAACA
TM2p	A2	Targeting	C5AR2_+_47835280.23-P1	CTTAAGGTTTGCCCATTCCCCCACCTTGTTGGGGCAGGAGAGGGCTCGGTTGTTTAAGAGCTAAGCTGACACCGTGGAAGCTATAACA
TM2p	A2	Targeting	C5AR2_+_47835309.23-P1	CTTAAGGTTTGCCCATTCCCCCACCTTGTTGGAGAACCCAAAATTACGGGGGTTTAAGAGCTAAGCTGACACCGTGGAAGCTATAACA
TM2p	A2	Targeting	C5AR2_+_47840122.23-P2	CTTAAGGTTTGCCCATTCCCCCACCTTGTTGGGGTGTGTGTATTCGGAGTCGTTTAAGAGCTAAGCTGACACCGTGGAAGCTATAACA
TM2p	A2	Targeting	C5AR2_+_47840220.23-P2	CTTAAGGTTTGCCCATTCCCCCACCTTGTTGGAGCACTCCAGCTGGTGTTGGTTTAAGAGCTAAGCTGACACCGTGGAAGCTATAACA
TM2p	A2	Targeting	C5AR2_+_47840250.23-P2	CTTAAGGTTTGCCCATTCCCCCACCTTGTTGGCTGACTATTATGGGTTGGCGTTTAAGAGCTAAGCTGACACCGTGGAAGCTATAACA
TM2p	A2	Targeting	C5AR2_+_47840254.23-P2	CTTAAGGTTTGCCCATTCCCCCACCTTGTTGGTCTGCTGACTATTATGGGTGTTTAAGAGCTAAGCTGACACCGTGGAAGCTATAACA
TM2p	A2	Targeting	C5AR2_+_47840259.23-P2	CTTAAGGTTTGCCCATTCCCCCACCTTGTTGGGGCTCTCTGCTGACTATTAGTTTAAGAGCTAAGCTGACACCGTGGAAGCTATAACA
TM2p	A2	Targeting	C5AR2_-_47835127.23-P1	CTTAAGGTTTGCCCATTCCCCCACCTTGTTGGAGGGGTTGAACACAGTTAGGTTTAAGAGCTAAGCTGACACCGTGGAAGCTATAACA
TM2p	A2	Targeting	C5AR2_-_47835163.23-P1	CTTAAGGTTTGCCCATTCCCCCACCTTGTTGGGGGGCAGCTGGCATGTTGTGTTTAAGAGCTAAGCTGACACCGTGGAAGCTATAACA
TM2p	A2	Targeting	C5AR2_-_47835223.23-P1	CTTAAGGTTTGCCCATTCCCCCACCTTGTTGGAGCAAACCGCATGCAGGTCGTTTAAGAGCTAAGCTGACACCGTGGAAGCTATAACA
TM2p	A2	Targeting	C5AR2_-_47835253.23-P1	CTTAAGGTTTGCCCATTCCCCCACCTTGTTGGAAGGTGGGACTTCGAGACTGTTTAAGAGCTAAGCTGACACCGTGGAAGCTATAACA
TM2p	A2	Targeting	C5AR2_-_47835259.23-P1	CTTAAGGTTTGCCCATTCCCCCACCTTGTTGGGGACTTCGAGACTAGGGTTGTTTAAGAGCTAAGCTGACACCGTGGAAGCTATAACA
TM2p	A2	Targeting	C5AR2_-_47835267.23-P1	CTTAAGGTTTGCCCATTCCCCCACCTTGTTGGAGACTAGGGTTGGGGACTTGTTTAAGAGCTAAGCTGACACCGTGGAAGCTATAACA
TM2p	A2	Targeting	C5AR2_-_47840096.23-P2	CTTAAGGTTTGCCCATTCCCCCACCTTGTTGGCTGCACACCTTTTACTCTAGTTTAAGAGCTAAGCTGACACCGTGGAAGCTATAACA
TM2p	A2	Targeting	C5AR2_-_47840117.23-P2	CTTAAGGTTTGCCCATTCCCCCACCTTGTTGGGATAAAAATAATACGAAAGGTTTAAGAGCTAAGCTGACACCGTGGAAGCTATAACA
TM2p	A2	Targeting	C5AR2_-_47840173.23-P2	CTTAAGGTTTGCCCATTCCCCCACCTTGTTGGTGGACTCTTCACTGCTACCGTTTAAGAGCTAAGCTGACACCGTGGAAGCTATAACA
TM2p	A2	Targeting	C5AR2_-_47840180.23-P2	CTTAAGGTTTGCCCATTCCCCCACCTTGTTGGTTCACTGCTACCTGGCATGGTTTAAGAGCTAAGCTGACACCGTGGAAGCTATAACA
TM2p	A2	Targeting	C5AR2_-_47840314.23-P2	CTTAAGGTTTGCCCATTCCCCCACCTTGTTGGCACTCTGACATTGTGGGGGGTTTAAGAGCTAAGCTGACACCGTGGAAGCTATAACA
TM2p	A2	Targeting	C5orf28_+_43483985.23-P1P2	CTTAAGGTTTGCCCATTCCCCCACCTTGTTGGCCGGCAGCCGACGTCTCTAGTTTAAGAGCTAAGCTGACACCGTGGAAGCTATAACA
TM2p	A2	Targeting	C5orf28_+_43484016.23-P1P2	CTTAAGGTTTGCCCATTCCCCCACCTTGTTGGCGGCCGACGCTGCGGTCTGGTTTAAGAGCTAAGCTGACACCGTGGAAGCTATAACA
TM2p	A2	Targeting	C5orf28_+_43484131.23-P1P2	CTTAAGGTTTGCCCATTCCCCCACCTTGTTGGAGGGGTCGGGGCCTACGGTGTTTAAGAGCTAAGCTGACACCGTGGAAGCTATAACA
TM2p	A2	Targeting	C5orf28_+_43484436.23-P1P2	CTTAAGGTTTGCCCATTCCCCCACCTTGTTGGGCTCCGTTGCCCACCCTGAGTTTAAGAGCTAAGCTGACACCGTGGAAGCTATAACA
TM2p	A2	Targeting	C5orf28_-_43483999.23-P1P2	CTTAAGGTTTGCCCATTCCCCCACCTTGTTGGGTCGGAGCCATAGAGACGTGTTTAAGAGCTAAGCTGACACCGTGGAAGCTATAACA
TM2p	A2	Targeting	C5orf28_-_43484034.23-P1P2	CTTAAGGTTTGCCCATTCCCCCACCTTGTTGGTGGCCTCAGACCGCAGCGTGTTTAAGAGCTAAGCTGACACCGTGGAAGCTATAACA
TM2p	A2	Targeting	C5orf28_-_43484057.23-P1P2	CTTAAGGTTTGCCCATTCCCCCACCTTGTTGGCGAGAGGACGCCGGGATACGTTTAAGAGCTAAGCTGACACCGTGGAAGCTATAACA
TM2p	A2	Targeting	C5orf28_-_43484076.23-P1P2	CTTAAGGTTTGCCCATTCCCCCACCTTGTTGGTGGCCAGCTCCAAGTCGAAGTTTAAGAGCTAAGCTGACACCGTGGAAGCTATAACA
TM2p	A2	Targeting	C5orf28_-_43484098.23-P1P2	CTTAAGGTTTGCCCATTCCCCCACCTTGTTGGAAGCGACGCATGAGTTGTTGTTTAAGAGCTAAGCTGACACCGTGGAAGCTATAACA
TM2p	A2	Targeting	C5orf28_-_43484454.23-P1P2	CTTAAGGTTTGCCCATTCCCCCACCTTGTTGGAAGCCCTCAGGGTGGGCAAGTTTAAGAGCTAAGCTGACACCGTGGAAGCTATAACA
TM2p	A2	Targeting	C5orf42_+_37249450.23-P1P2	CTTAAGGTTTGCCCATTCCCCCACCTTGTTGGAGGACGCAGGCTCGCGTCAGTTTAAGAGCTAAGCTGACACCGTGGAAGCTATAACA
TM2p	A2	Targeting	C5orf42_+_37249602.23-P1P2	CTTAAGGTTTGCCCATTCCCCCACCTTGTTGGGCGCGGCTGGCAGCTTAGAGTTTAAGAGCTAAGCTGACACCGTGGAAGCTATAACA
TM2p	A2	Targeting	C5orf42_+_37249661.23-P1P2	CTTAAGGTTTGCCCATTCCCCCACCTTGTTGGGTCCGGCGGCCGCTGAGGAGTTTAAGAGCTAAGCTGACACCGTGGAAGCTATAACA
TM2p	A2	Targeting	C5orf42_+_37249700.23-P1P2	CTTAAGGTTTGCCCATTCCCCCACCTTGTTGGTCCGAGGAACGCGTTAACTGTTTAAGAGCTAAGCTGACACCGTGGAAGCTATAACA
TM2p	A2	Targeting	C5orf42_+_37249859.23-P1P2	CTTAAGGTTTGCCCATTCCCCCACCTTGTTGGTGCCCACGTGAACTGAGGAGTTTAAGAGCTAAGCTGACACCGTGGAAGCTATAACA
TM2p	A2	Targeting	C5orf42_+_37249863.23-P1P2	CTTAAGGTTTGCCCATTCCCCCACCTTGTTGGAAGGTGCCCACGTGAACTGGTTTAAGAGCTAAGCTGACACCGTGGAAGCTATAACA
TM2p	A2	Targeting	C5orf42_-_37249547.23-P1P2	CTTAAGGTTTGCCCATTCCCCCACCTTGTTGGAACCGGCCGGGAACGCCGCGTTTAAGAGCTAAGCTGACACCGTGGAAGCTATAACA
TM2p	A2	Targeting	C5orf42_-_37249601.23-P1P2	CTTAAGGTTTGCCCATTCCCCCACCTTGTTGGTGCTCTCAGGCCTCCGCCCGTTTAAGAGCTAAGCTGACACCGTGGAAGCTATAACA
TM2p	A2	Targeting	C5orf42_-_37249673.23-P1P2	CTTAAGGTTTGCCCATTCCCCCACCTTGTTGGCGCGCGCTCCCCTCCTCAGGTTTAAGAGCTAAGCTGACACCGTGGAAGCTATAACA
TM2p	A2	Targeting	C5orf42_-_37249756.23-P1P2	CTTAAGGTTTGCCCATTCCCCCACCTTGTTGGAGCGCACAGGCATTGGGCGGTTTAAGAGCTAAGCTGACACCGTGGAAGCTATAACA
[truncated: 16,520 more rows]
