# Supplementary material for: Identification of orphan ligand-receptor relationships using a cell-based CRISPRa enrichment screening platform
Source: eLife. 2022 Sep 30;11:e81398. doi: 10.7554/eLife.81398 (PMC9578707; doi:10.7554/eLife.81398)
Supplement: Figure 2—source data 1. — Complete DNA sequences for all 80 secreted bait proteins and full-length pD649 expression plasmid sequences. [file elife-81398-fig2-data1.xlsx]

## Sheet: Data S2
ID	Signal Peptide	DNA Sequence	Length [DNA Sequence]	Full Plasmid Sequence
KCG_S0001	Endogenous	GCTAGCGCCACCATGAAGACCTTTACATGGACCCTGGGCGTGCTGTTCTTCCTGCTGGTGGATACAGGACACTGCAGAGGCGGCCAGTTCAAGATCAAGAAGATCAACCAGCGGAGATACCCCAGAGCCACCGATGGCAAAGAAGAGGCCAAGAAGTGCGCCTACACCTTCCTGGTGCCTGAGCAGAGAATCACAGGCCCCATCTGCGTGAACACCAAAGGCCAGGATGCCAGCACCATCAAGGACATGATCACCCGGATGGACCTGGAAAACCTGAAGGACGTGCTGAGCCGGCAGAAACGCGAGATTGATGTGCTGCAGCTGGTGGTGGACGTGGACGGCAACATCGTGAACGAAGTGAAGCTGCTGCGGAAAGAAAGCCGGAACATGAACAGCAGA…	1493	TTTCAATATTATTGAAGCATTTATCAGGGTTATTGTCTCATGAGCGGATACATATTTGAATGTATTTAGAAAAATAAACAAATAGGGGTCAGTGTTACAACCAATTAACCAATTCTGAACATTATCGCGAGCCCATTTATACCTGAATATGGCTCATAACACCCCTTGCTCATGACCAAAATCCCTTAACGTGAGTTACGCGCGCGTCGTTCCACTGAGCGTCAGACCCCGTAGAAAAGATCAAAGGATCTTCTTGAGATCCTTTTTTTCTGCGCGTAATCTGCTGCTTGCAAACAAAAAAACCACCGCTACCAGCGGTGGTTTGTTTGCCGGATCAAGAGCTACCAACTCTTTTTCCGAAGGTAACTGGCTTCAGCAGAGCGCAGATACCAAATACTG…
KCG_S0002	Endogenous	GCTAGCGCCACCATGAGGCCTCTGTGTGTGACATGTTGGTGGCTGGGACTGCTGGCTGCTATGGGAGCTGTGGCTGGCCAAGAGGATGGCTTTGAGGGCACAGAAGAGGGCAGCCCCAGAGAGTTCATCTACCTGAACAGATACAAGAGAGCCGGCGAGAGCCAGGACAAGTGCACCTACACCTTTATCGTGCCCCAGCAGAGAGTGACCGGCGCCATCTGTGTGAACAGCAAAGAACCCGAGGTGCTGCTGGAAAACCGGGTGCACAAGCAAGAGCTGGAACTGCTGAACAACGAGCTGCTGAAGCAGAAGCGGCAGATCGAGACACTGCAGCAGCTGGTGGAAGTGGATGGCGGCATCGTGTCTGAAGTGAAGCTGCTGCGGAAAGAAAGCCGGAAC…	1499	TTTCAATATTATTGAAGCATTTATCAGGGTTATTGTCTCATGAGCGGATACATATTTGAATGTATTTAGAAAAATAAACAAATAGGGGTCAGTGTTACAACCAATTAACCAATTCTGAACATTATCGCGAGCCCATTTATACCTGAATATGGCTCATAACACCCCTTGCTCATGACCAAAATCCCTTAACGTGAGTTACGCGCGCGTCGTTCCACTGAGCGTCAGACCCCGTAGAAAAGATCAAAGGATCTTCTTGAGATCCTTTTTTTCTGCGCGTAATCTGCTGCTTGCAAACAAAAAAACCACCGCTACCAGCGGTGGTTTGTTTGCCGGATCAAGAGCTACCAACTCTTTTTCCGAAGGTAACTGGCTTCAGCAGAGCGCAGATACCAAATACTG…
KCG_S0003	Endogenous	GCTAGCGCCACCATGTTCACCATCAAGCTGCTGCTGTTCATCGTGCCCCTGGTCATCAGCAGCAGAATCGACCAGGACAACAGCAGCTTCGACTCTCTGAGCCCCGAGCCTAAGAGCAGATTCGCCATGCTGGACGACGTGAAGATCCTGGCCAATGGACTGCTGCAGCTCGGCCACGGACTGAAGGATTTCGTGCACAAGACCAAGGGCCAGATCAACGACATCTTCCAGAAGCTGAACATCTTCGACCAGAGCTTCTACGACCTGAGCCTGCAGACCAGCGAGATCAAAGAGGAAGAGAAAGAGCTGCGGCGGACCACCTACAAGCTGCAAGTGAAGAACGAAGAGGTCAAAAACATGAGCCTCGAGCTGAACAGCAAGCTGGAAAGCCTGCTGGAA…	1400	TTTCAATATTATTGAAGCATTTATCAGGGTTATTGTCTCATGAGCGGATACATATTTGAATGTATTTAGAAAAATAAACAAATAGGGGTCAGTGTTACAACCAATTAACCAATTCTGAACATTATCGCGAGCCCATTTATACCTGAATATGGCTCATAACACCCCTTGCTCATGACCAAAATCCCTTAACGTGAGTTACGCGCGCGTCGTTCCACTGAGCGTCAGACCCCGTAGAAAAGATCAAAGGATCTTCTTGAGATCCTTTTTTTCTGCGCGTAATCTGCTGCTTGCAAACAAAAAAACCACCGCTACCAGCGGTGGTTTGTTTGCCGGATCAAGAGCTACCAACTCTTTTTCCGAAGGTAACTGGCTTCAGCAGAGCGCAGATACCAAATACTG…
KCG_S0004	Endogenous	GCTAGCGCCACCATGTCTGGTGCTCCTACAGCTGGTGCTGCCCTGATGCTTTGTGCTGCAACAGCAGTGCTGCTGTCTGCTCAAGGTGGCCCTGTGCAGAGCAAGAGCCCTAGATTTGCCAGCTGGGACGAGATGAATGTGCTGGCCCATGGACTGCTGCAGCTCGGACAAGGACTGAGAGAGCACGCCGAGAGAACAAGATCTCAGCTGTCTGCCCTGGAAAGAAGGCTGAGCGCTTGCGGATCTGCCTGTCAGGGAACAGAGGGCTCTACAGATCTGCCTCTGGCTCCCGAGTCTAGAGTGGATCCTGAAGTGCTGCACAGCCTGCAGACACAGCTGAAGGCCCAGAACAGCAGAATCCAGCAGCTGTTCCACAAAGTGGCCCAGCAGCAGAGACAC…	1238	TTTCAATATTATTGAAGCATTTATCAGGGTTATTGTCTCATGAGCGGATACATATTTGAATGTATTTAGAAAAATAAACAAATAGGGGTCAGTGTTACAACCAATTAACCAATTCTGAACATTATCGCGAGCCCATTTATACCTGAATATGGCTCATAACACCCCTTGCTCATGACCAAAATCCCTTAACGTGAGTTACGCGCGCGTCGTTCCACTGAGCGTCAGACCCCGTAGAAAAGATCAAAGGATCTTCTTGAGATCCTTTTTTTCTGCGCGTAATCTGCTGCTTGCAAACAAAAAAACCACCGCTACCAGCGGTGGTTTGTTTGCCGGATCAAGAGCTACCAACTCTTTTTCCGAAGGTAACTGGCTTCAGCAGAGCGCAGATACCAAATACTG…
KCG_S0005	Endogenous	GCTAGCGCCACCATGATGAGCCCTTCTCAGGCCAGCCTGCTGTTCCTGAACGTGTGCATCTTTATCTGCGGCGAGGCCGTGCAGGGCAATTGTGTGCACCACAGCACAGACAGCAGCGTGGTCAACATCGTGGAAGATGGCAGCAACGCCAAGGACGAGAGCAAGAGCAACGACACCGTGTGCAAAGAGGACTGCGAGGAATCCTGCGACGTGAAAACAAAGATCACCCGGGAAGAGAAGCACTTCATGTGCCGGAACCTGCAGAACAGCATCGTGTCCTACACCAGAAGCACCAAGAAACTGCTGCGGAACATGATGGACGAGCAGCAGGCCTCTCTGGACTACCTGAGCAATCAAGTGAACGAGCTGATGAACCGGGTGCTGCTGCTGACCACCGAG…	1184	TTTCAATATTATTGAAGCATTTATCAGGGTTATTGTCTCATGAGCGGATACATATTTGAATGTATTTAGAAAAATAAACAAATAGGGGTCAGTGTTACAACCAATTAACCAATTCTGAACATTATCGCGAGCCCATTTATACCTGAATATGGCTCATAACACCCCTTGCTCATGACCAAAATCCCTTAACGTGAGTTACGCGCGCGTCGTTCCACTGAGCGTCAGACCCCGTAGAAAAGATCAAAGGATCTTCTTGAGATCCTTTTTTTCTGCGCGTAATCTGCTGCTTGCAAACAAAAAAACCACCGCTACCAGCGGTGGTTTGTTTGCCGGATCAAGAGCTACCAACTCTTTTTCCGAAGGTAACTGGCTTCAGCAGAGCGCAGATACCAAATACTG…
KCG_S0006	Endogenous	GCTAGCGCCACCATGGGAAAACCTTGGCTGAGAGCACTGCAGCTGCTGCTGCTTCTTGGAGCCTCTTGGGCTAGAGCTGGCGCCCCTAGATGTACCTACACCTTTGTGCTGCCTCCACAGAAATTCACAGGCGCCGTTTGTTGGAGCGGCCCTGCCTCTACAAGAGCCACACCTGAAGCCGCCAATGCCTCTGAACTGGCCGCTCTGAGAATGAGAGTGGGCAGACACGAGGAACTGCTGAGAGAGCTGCAAAGACTGGCTGCTGCAGATGGTGCTGTTGCTGGCGAAGTGCGGGCCCTGAGAAAAGAGTCTAGAGGCCTGTCTGCCAGACTGGGACAGCTGAGAGCCCAGCTGCAACATGAAGCTGGACCTGGTGCTGGACCAGGCGCTGATCTTGGA…	1430	TTTCAATATTATTGAAGCATTTATCAGGGTTATTGTCTCATGAGCGGATACATATTTGAATGTATTTAGAAAAATAAACAAATAGGGGTCAGTGTTACAACCAATTAACCAATTCTGAACATTATCGCGAGCCCATTTATACCTGAATATGGCTCATAACACCCCTTGCTCATGACCAAAATCCCTTAACGTGAGTTACGCGCGCGTCGTTCCACTGAGCGTCAGACCCCGTAGAAAAGATCAAAGGATCTTCTTGAGATCCTTTTTTTCTGCGCGTAATCTGCTGCTTGCAAACAAAAAAACCACCGCTACCAGCGGTGGTTTGTTTGCCGGATCAAGAGCTACCAACTCTTTTTCCGAAGGTAACTGGCTTCAGCAGAGCGCAGATACCAAATACTG…
KCG_S0007	Endogenous	GCTAGCGCCACCATGCTGAAGAAACCTCTGTCTGCCGTGACCTGGCTGTGCATCTTCATCGTGGCCTTTGTGTCTCACCCCGCCTGGCTGCAGAAGCTGTCTAAGCACAAAACCCCTGCTCAGCCTCAGCTGAAGGCCGCCAATTGCTGCGAGGAAGTGAAAGAACTGAAGGCCCAGGTGGCCAACCTGAGCAGTCTGCTGTCTGAGCTGAACAAGAAGCAAGAGCGCGACTGGGTGTCCGTGGTCATGCAAGTGATGGAACTGGAAAGCAACAGCAAGCGGATGGAAAGCAGACTGACCGACGCCGAGAGCAAGTACAGCGAGATGAACAACCAGATCGACATCATGCAGCTCCAGGCCGCTCAGACCGTGACACAGACATCTGCCGATGCCATCTAC…	1058	TTTCAATATTATTGAAGCATTTATCAGGGTTATTGTCTCATGAGCGGATACATATTTGAATGTATTTAGAAAAATAAACAAATAGGGGTCAGTGTTACAACCAATTAACCAATTCTGAACATTATCGCGAGCCCATTTATACCTGAATATGGCTCATAACACCCCTTGCTCATGACCAAAATCCCTTAACGTGAGTTACGCGCGCGTCGTTCCACTGAGCGTCAGACCCCGTAGAAAAGATCAAAGGATCTTCTTGAGATCCTTTTTTTCTGCGCGTAATCTGCTGCTTGCAAACAAAAAAACCACCGCTACCAGCGGTGGTTTGTTTGCCGGATCAAGAGCTACCAACTCTTTTTCCGAAGGTAACTGGCTTCAGCAGAGCGCAGATACCAAATACTG…
KCG_S0008	Endogenous	GCTAGCGCCACCATGCCTGTTCCAGCTCTGTGTCTGCTGTGGGCCCTCGCCATGGTTACAAGACCTGCTTCTGCTGCCCCTATGGGAGGACCTGAACTGGCCCAGCATGAGGAACTGACACTGCTGTTTCACGGCACCCTGCAGCTGGGACAAGCTCTGAATGGCGTGTACAGAACCACCGAGGGCAGACTGACCAAGGCCAGAAATTCTCTGGGCCTGTACGGCAGAACAATCGAGCTGCTGGGGCAAGAAGTGTCCAGAGGCAGAGATGCCGCTCAAGAGCTGAGAGCCTCTCTGCTGGAAACCCAGATGGAAGAGGACATCCTGCAGCTTCAGGCCGAAGCCACAGCTGAAGTGCTGGGAGAAGTGGCCCAGGCTCAGAAGGTGCTGAGAGATAGC…	614	TTTCAATATTATTGAAGCATTTATCAGGGTTATTGTCTCATGAGCGGATACATATTTGAATGTATTTAGAAAAATAAACAAATAGGGGTCAGTGTTACAACCAATTAACCAATTCTGAACATTATCGCGAGCCCATTTATACCTGAATATGGCTCATAACACCCCTTGCTCATGACCAAAATCCCTTAACGTGAGTTACGCGCGCGTCGTTCCACTGAGCGTCAGACCCCGTAGAAAAGATCAAAGGATCTTCTTGAGATCCTTTTTTTCTGCGCGTAATCTGCTGCTTGCAAACAAAAAAACCACCGCTACCAGCGGTGGTTTGTTTGCCGGATCAAGAGCTACCAACTCTTTTTCCGAAGGTAACTGGCTTCAGCAGAGCGCAGATACCAAATACTG…
KCG_S0009	Endogenous	GCTAGCGCCACCATGAATTGGAGATTCGTGGAACTGCTGTACTTCCTGTTCATCTGGGGCAGAATCAGCGTGCAGCCTTCTCACCAAGAGCCTGCCGGAACCGATCAGCACGTGTCCAAAGAGTTCGACTGGCTGATCTCCGACAGAGGCCCCTTTCACCACAGCAGAAGCTACCTGAGCTTCGTCGAGAGACACCGGCAGGGCTTCACCACCAGATACAAGATCTACCGCGAGTTCGCCCGGTGGAAAGTGCGGAATACCGCCATCGAGAGAAGAGATCTCGTGCGGCATCCTGTGCCTCTGATGCCTGAGTTCCAGCGGTCTATCAGACTGCTCGGCAGAAGGCCCACCACTCAGCAGTTCATCGACACCATCATCAAGAAGTACGGCACCCATCTG…	2303	TTTCAATATTATTGAAGCATTTATCAGGGTTATTGTCTCATGAGCGGATACATATTTGAATGTATTTAGAAAAATAAACAAATAGGGGTCAGTGTTACAACCAATTAACCAATTCTGAACATTATCGCGAGCCCATTTATACCTGAATATGGCTCATAACACCCCTTGCTCATGACCAAAATCCCTTAACGTGAGTTACGCGCGCGTCGTTCCACTGAGCGTCAGACCCCGTAGAAAAGATCAAAGGATCTTCTTGAGATCCTTTTTTTCTGCGCGTAATCTGCTGCTTGCAAACAAAAAAACCACCGCTACCAGCGGTGGTTTGTTTGCCGGATCAAGAGCTACCAACTCTTTTTCCGAAGGTAACTGGCTTCAGCAGAGCGCAGATACCAAATACTG…
KCG_S0010	Endogenous	GCTAGCGCCACCATGAGATGGCAGTGCGGCACAAGATTCAGAGGCCTTAGACCTGCCGTGGCTCCTTGGACAGCACTGCTTGCTCTTGGACTGCCTGGATGGGTGCTCGCTGTTTCTGCTACAGCTGCTGCTGTGGTGCCTGAACAGCATGCTTCTGTGGCTGGACAGCATCCCCTGGATTGGCTGCTGACCGATAGAGGCCCTTTCCACAGAGCCCAAGAGTACGCCGACTTCATGGAACGGTACAGACAGGGCTTCACCACCAGATACCGGATCTACCGCGAGTTCGCCCGGTGGAAAGTGAACAATCTGGCCCTGGAACGGAAGGACTTCTTCAGCTTGCCTCTGCCTCTGGCTCCCGAGTTCATCCGGAATATCAGACTGCTCGGCAGACGGCCC…	2369	TTTCAATATTATTGAAGCATTTATCAGGGTTATTGTCTCATGAGCGGATACATATTTGAATGTATTTAGAAAAATAAACAAATAGGGGTCAGTGTTACAACCAATTAACCAATTCTGAACATTATCGCGAGCCCATTTATACCTGAATATGGCTCATAACACCCCTTGCTCATGACCAAAATCCCTTAACGTGAGTTACGCGCGCGTCGTTCCACTGAGCGTCAGACCCCGTAGAAAAGATCAAAGGATCTTCTTGAGATCCTTTTTTTCTGCGCGTAATCTGCTGCTTGCAAACAAAAAAACCACCGCTACCAGCGGTGGTTTGTTTGCCGGATCAAGAGCTACCAACTCTTTTTCCGAAGGTAACTGGCTTCAGCAGAGCGCAGATACCAAATACTG…
KCG_S0011	Endogenous	GCTAGCGCCACCATGATTTGGAGATCTAGAGCCGGCGCTGAGCTGTTCTCTCTGATGGCCCTTTGGGAGTGGATCGCCCTGTCTCTGCACTGTTGGGTTCTCGCTGTGGCCGCCGTTTCTGATCAGCACGCCACCTCTCCATTCGACTGGCTGCTGAGCGATAAGGGCCCCTTCCACAGAAGCCAAGAGTACACCGACTTCGTGGACAGAAGCAGACAGGGCTTCAGCACCCGGTACAAGATCTACCGCGAGTTCGGCCGGTGGAAAGTGAACAACCTGGCCGTGGAAAGACGGAACTTTCTGGGCTCTCCTCTGCCTCTGGCTCCCGAGTTCTTCCGGAATATCAGACTGCTCGGCAGACGGCCCACACTGCAGCAGATCACCGAGAACCTGATCAAG…	2318	TTTCAATATTATTGAAGCATTTATCAGGGTTATTGTCTCATGAGCGGATACATATTTGAATGTATTTAGAAAAATAAACAAATAGGGGTCAGTGTTACAACCAATTAACCAATTCTGAACATTATCGCGAGCCCATTTATACCTGAATATGGCTCATAACACCCCTTGCTCATGACCAAAATCCCTTAACGTGAGTTACGCGCGCGTCGTTCCACTGAGCGTCAGACCCCGTAGAAAAGATCAAAGGATCTTCTTGAGATCCTTTTTTTCTGCGCGTAATCTGCTGCTTGCAAACAAAAAAACCACCGCTACCAGCGGTGGTTTGTTTGCCGGATCAAGAGCTACCAACTCTTTTTCCGAAGGTAACTGGCTTCAGCAGAGCGCAGATACCAAATACTG…
KCG_S0012	Endogenous	GCTAGCGCCACCATGGATCTGCTGCAGTTTCTGGCCTTCCTGTTCGTGCTGCTGCTGTCTGGAATGGGAGCCACCGGCACACTGAGAACATCTCTGGACCCCAGCCTGGAAATCTACAAGAAGATGTTCGAAGTCAAGCGGCGGGAACAGCTGCTGGCCCTGAAAAATCTGGCCCAGCTGAACGACATCCACCAGCAGTACAAGATCCTGGACGTGATGCTGAAGGGCCTGTTCAAGGTGCTGGAAGATAGCAGAACAGTGCTGACAGCCGCCGACGTTCTGCCTGATGGACCTTTTCCACAGGACGAGAAGCTGAAGGACGCCTTTAGCCACGTGGTGGAAAACACCGCCTTTTTCGGCGACGTGGTGCTGAGATTCCCCAGAATCGTGCACTACTAC…	707	TTTCAATATTATTGAAGCATTTATCAGGGTTATTGTCTCATGAGCGGATACATATTTGAATGTATTTAGAAAAATAAACAAATAGGGGTCAGTGTTACAACCAATTAACCAATTCTGAACATTATCGCGAGCCCATTTATACCTGAATATGGCTCATAACACCCCTTGCTCATGACCAAAATCCCTTAACGTGAGTTACGCGCGCGTCGTTCCACTGAGCGTCAGACCCCGTAGAAAAGATCAAAGGATCTTCTTGAGATCCTTTTTTTCTGCGCGTAATCTGCTGCTTGCAAACAAAAAAACCACCGCTACCAGCGGTGGTTTGTTTGCCGGATCAAGAGCTACCAACTCTTTTTCCGAAGGTAACTGGCTTCAGCAGAGCGCAGATACCAAATACTG…
KCG_S0013	Endogenous	GCTAGCGCCACCATGGTTCCTCCACCTCCATCTAGAGGCGGAGCCGCTAGAGGACAACTGGGAAGATCTCTGGGACCTCTGCTGCTGCTTCTGGCTCTGGGCCACACATGGACCTACAGAGAAGAACCCGAGGACGGCGACAGAGAGATCTGCAGCGAAAGCAAGATCGCCACCACAAAGTACCCCTGCCTGAAGTCTAGCGGCGAGCTGACCACCTGTTACCGGAAGAAGTGCTGCAAGGGCTACAAGTTCGTGCTGGGCCAGTGCATCCCCGAGGATTACGATGTGTGTGCCGAGGCTCCTTGCGAGCAGCAGTGCACCGATAATTTCGGCAGAGTGCTGTGCACATGCTACCCCGGCTACAGATACGATAGAGAGCGGCACAGAAAGAGAGAGAAG…	1238	TTTCAATATTATTGAAGCATTTATCAGGGTTATTGTCTCATGAGCGGATACATATTTGAATGTATTTAGAAAAATAAACAAATAGGGGTCAGTGTTACAACCAATTAACCAATTCTGAACATTATCGCGAGCCCATTTATACCTGAATATGGCTCATAACACCCCTTGCTCATGACCAAAATCCCTTAACGTGAGTTACGCGCGCGTCGTTCCACTGAGCGTCAGACCCCGTAGAAAAGATCAAAGGATCTTCTTGAGATCCTTTTTTTCTGCGCGTAATCTGCTGCTTGCAAACAAAAAAACCACCGCTACCAGCGGTGGTTTGTTTGCCGGATCAAGAGCTACCAACTCTTTTTCCGAAGGTAACTGGCTTCAGCAGAGCGCAGATACCAAATACTG…
KCG_S0014	Endogenous	GCTAGCGCCACCATGCTGAGACAACTGCTGCTGGCTGCTCTGTGTCTTGCTGGACCTCCTGCTCCTGCTAGAGCCTGTCAATTGCCTTCTGAGTGGCGGCCTCTGTCTGAGGGATGTAGAGCCGAGCTGGCCGAGACAATCGTGTATGCTAGAGTGCTGGCCCTGCATCCTGAGGCTCCAGGCCTGTATAATCATCTGCCTTGGCAGTATCACGCCGGCCAAGGCGGACTGTTTTACAGCGCTGAGGTGGAAATGCTGTGCGATCAGGCCTGGGGCTCTATGCTGGAAGTGCCTGCCGGAAGCAGACTGAATCTGACCGGCCTGGGCTACTTCAGCTGTCACTCTCACACCGTGGTGCAGGACTACAGCTACTTCTTCTTCCTGCGGATGGACGAGAAC…	830	TTTCAATATTATTGAAGCATTTATCAGGGTTATTGTCTCATGAGCGGATACATATTTGAATGTATTTAGAAAAATAAACAAATAGGGGTCAGTGTTACAACCAATTAACCAATTCTGAACATTATCGCGAGCCCATTTATACCTGAATATGGCTCATAACACCCCTTGCTCATGACCAAAATCCCTTAACGTGAGTTACGCGCGCGTCGTTCCACTGAGCGTCAGACCCCGTAGAAAAGATCAAAGGATCTTCTTGAGATCCTTTTTTTCTGCGCGTAATCTGCTGCTTGCAAACAAAAAAACCACCGCTACCAGCGGTGGTTTGTTTGCCGGATCAAGAGCTACCAACTCTTTTTCCGAAGGTAACTGGCTTCAGCAGAGCGCAGATACCAAATACTG…
KCG_S0015	Endogenous	GCTAGCGCCACCATGTGGTGTGCTTCTCCAGTGGCCGTGGTGGCCTTTTGTGCTGGACTGCTGGTGTCTCACCCTGTGCTGACACAAGGACAAGAAGCTGGCGGTAGACCTGGCGCCGATTGCGAAGTGTGCAAAGAGTTCCTGAACCGCTTCTACAAGAGCCTGATCGACCGGGGCGTGAACTTCAGCCTGGACACCATCGAGAAAGAGCTGATCTCCTTCTGCCTGGATACCAAGGGCAAAGAAAACCGGCTGTGCTACTACCTGGGCGCCACAAAGGATGCCGCCACCAAGATCCTGAGCGAAGTGACCAGACCTATGAGCGTGCACATGCCCGCCATGAAGATCTGCGAGAAGCTGAAGAAACTGGACAGCCAGATTTGCGAGCTGAAGTACGAG…	581	TTTCAATATTATTGAAGCATTTATCAGGGTTATTGTCTCATGAGCGGATACATATTTGAATGTATTTAGAAAAATAAACAAATAGGGGTCAGTGTTACAACCAATTAACCAATTCTGAACATTATCGCGAGCCCATTTATACCTGAATATGGCTCATAACACCCCTTGCTCATGACCAAAATCCCTTAACGTGAGTTACGCGCGCGTCGTTCCACTGAGCGTCAGACCCCGTAGAAAAGATCAAAGGATCTTCTTGAGATCCTTTTTTTCTGCGCGTAATCTGCTGCTTGCAAACAAAAAAACCACCGCTACCAGCGGTGGTTTGTTTGCCGGATCAAGAGCTACCAACTCTTTTTCCGAAGGTAACTGGCTTCAGCAGAGCGCAGATACCAAATACTG…
KCG_S0016	Endogenous	GCTAGCGCCACCATGGCTGCTCCTAGAGGTAGAGCTGCTCCTTGGACAACAGCCCTGCTGCTTCTGCTGGCTTCTCAGGTGCTGTCTCCTGGCTCTTGTGCCGATGAAGAGGAAGTGCCTGAGGAATGGGTGCTGCTGCATGTGGTGCAGGGACAGATCGGAGCCGGCAACTACTCCTACCTGAGACTGAACCACGAGGGCAAGATCGTGCTGCGGATGAGATCTCTGAAAGGCGACGCCGATCTGTACGTGTCCGCTTCTAGCCTGCATCCTAGCTTCGACGACTACGAGCTGCAGTCTGCCACTTGTGGACCCGATGCCGTGTCTATCCCCGCTCACTTTAGAAGGCCTGTCGGCATCGGAGTGTACGGACACCCTTCTCACCTGGAAAGCGAGTTC…	593	TTTCAATATTATTGAAGCATTTATCAGGGTTATTGTCTCATGAGCGGATACATATTTGAATGTATTTAGAAAAATAAACAAATAGGGGTCAGTGTTACAACCAATTAACCAATTCTGAACATTATCGCGAGCCCATTTATACCTGAATATGGCTCATAACACCCCTTGCTCATGACCAAAATCCCTTAACGTGAGTTACGCGCGCGTCGTTCCACTGAGCGTCAGACCCCGTAGAAAAGATCAAAGGATCTTCTTGAGATCCTTTTTTTCTGCGCGTAATCTGCTGCTTGCAAACAAAAAAACCACCGCTACCAGCGGTGGTTTGTTTGCCGGATCAAGAGCTACCAACTCTTTTTCCGAAGGTAACTGGCTTCAGCAGAGCGCAGATACCAAATACTG…
KCG_S0017	Endogenous	GCTAGCGCCACCATGGTTCGACCTATGCTGCTGCTGTCTCTGGGACTGCTGGCTGGACTTCTTCCTGCTCTGGCCGCCTGTCCTCAGAATTGCCACTGTCACTCTGACCTGCAGCACGTGATCTGCGACAAAGTGGGCCTGCAGAAAATCCCCAAGGTGTCCGAAAAGACCAAGCTGCTGAACCTGCAGCGGAACAACTTTCCCGTGCTGGCCGCCAACAGCTTCAGAGCCATGCCTAATCTGGTGTCCCTGCATCTGCAGCACTGCCAGATTAGAGAAGTGGCCGCTGGCGCCTTTAGAGGCCTGAAGCAGCTGATCTACCTGTACCTGAGCCACAACGACATCCGGGTTCTGAGAGCCGGCGCTTTCGATGATCTGACCGAGCTGACATACCTCTAC…	1097	TTTCAATATTATTGAAGCATTTATCAGGGTTATTGTCTCATGAGCGGATACATATTTGAATGTATTTAGAAAAATAAACAAATAGGGGTCAGTGTTACAACCAATTAACCAATTCTGAACATTATCGCGAGCCCATTTATACCTGAATATGGCTCATAACACCCCTTGCTCATGACCAAAATCCCTTAACGTGAGTTACGCGCGCGTCGTTCCACTGAGCGTCAGACCCCGTAGAAAAGATCAAAGGATCTTCTTGAGATCCTTTTTTTCTGCGCGTAATCTGCTGCTTGCAAACAAAAAAACCACCGCTACCAGCGGTGGTTTGTTTGCCGGATCAAGAGCTACCAACTCTTTTTCCGAAGGTAACTGGCTTCAGCAGAGCGCAGATACCAAATACTG…
KCG_S0018	Endogenous	GCTAGCGCCACCATGGAAGGCCCTAGAAGCTCTACACATGTGCCCCTGGTTCTGCCTCTGCTGGTTCTTCTGCTGCTGGCTCCTGCTAGACAGGCCGCTGCTCAAAGATGTCCTCAGGCCTGCATCTGCGACAACTCTAGAAGGCACGTGGCCTGCAGATACCAGAATCTGACCGAGGTGCCCGACGCCATTCCTGAGCTGACACAGAGACTGGACCTGCAGGGCAACCTGCTGAAAGTGATTCCTGCCGCTGCTTTTCAGGGCGTGCCACACCTGACACACCTGGATCTGAGACACTGCGAAGTGGAACTGGTGGCCGAGGGCGCTTTTAGAGGACTGGGTAGACTGCTGCTGCTGAACCTGGCCAGCAATCACCTGAGAGAGCTGCCTCAAGAGGCC…	2306	TTTCAATATTATTGAAGCATTTATCAGGGTTATTGTCTCATGAGCGGATACATATTTGAATGTATTTAGAAAAATAAACAAATAGGGGTCAGTGTTACAACCAATTAACCAATTCTGAACATTATCGCGAGCCCATTTATACCTGAATATGGCTCATAACACCCCTTGCTCATGACCAAAATCCCTTAACGTGAGTTACGCGCGCGTCGTTCCACTGAGCGTCAGACCCCGTAGAAAAGATCAAAGGATCTTCTTGAGATCCTTTTTTTCTGCGCGTAATCTGCTGCTTGCAAACAAAAAAACCACCGCTACCAGCGGTGGTTTGTTTGCCGGATCAAGAGCTACCAACTCTTTTTCCGAAGGTAACTGGCTTCAGCAGAGCGCAGATACCAAATACTG…
KCG_S0019	Endogenous	GCTAGCGCCACCATGGGACTGCCTGGACTGTTTTGTCTGGCCGTGCTGGCCGCCTCTAGCTTCTCTAAGGCCAGAGAGGAAGAGATCACCCCTGTCGTGTCTATCGCCTACAAGGTGCTGGAAGTGTTCCCCAAAGGCAGATGGGTGCTGATCACCTGTTGTGCCCCTCAGCCTCCTCCACCTATCACATACAGCCTGTGCGGCACCAAGAACATCAAGGTGGCCAAGAAGGTGGTCAAGACCCACGAGCCTGCCAGCTTCAACCTGAACGTGACCCTGAAGTCTAGCCCCGACCTGCTGACCTACTTTTGTTGGGCCTCTAGCACATCTGGCGCCCACGTTGACTCTGCCAGACTGCAGATGCACTGGGAGCTGTGGTCTAAGCCTGTGTCCGAGCTG…	815	TTTCAATATTATTGAAGCATTTATCAGGGTTATTGTCTCATGAGCGGATACATATTTGAATGTATTTAGAAAAATAAACAAATAGGGGTCAGTGTTACAACCAATTAACCAATTCTGAACATTATCGCGAGCCCATTTATACCTGAATATGGCTCATAACACCCCTTGCTCATGACCAAAATCCCTTAACGTGAGTTACGCGCGCGTCGTTCCACTGAGCGTCAGACCCCGTAGAAAAGATCAAAGGATCTTCTTGAGATCCTTTTTTTCTGCGCGTAATCTGCTGCTTGCAAACAAAAAAACCACCGCTACCAGCGGTGGTTTGTTTGCCGGATCAAGAGCTACCAACTCTTTTTCCGAAGGTAACTGGCTTCAGCAGAGCGCAGATACCAAATACTG…
KCG_S0020	Endogenous	GCTAGCGCCACCATGACAGCTGCTTCTATGGGACCTGTCAGAGTGGCCTTTGTGGTGCTGCTGGCCCTGTGTTCTAGACCTGCTGTGGGCCAGAATTGCAGCGGCCCTTGTAGATGTCCTGACGAGCCTGCTCCTAGATGTCCAGCTGGTGTCTCTCTGGTGCTGGATGGCTGTGGCTGTTGCAGAGTGTGTGCCAAGCAGCTGGGAGAGCTGTGCACCGAGAGAGATCCTTGCGATCCTCACAAGGGCCTGTTCTGCCACTTTGGCAGCCCCGCCAATAGAAAGATCGGCGTGTGTACAGCCAAGGATGGCGCCCCTTGTATCTTCGGCGGCACAGTGTATAGAAGCGGCGAGAGCTTTCAGAGCAGCTGCAAGTACCAGTGCACATGCCTGGATGGC…	1067	TTTCAATATTATTGAAGCATTTATCAGGGTTATTGTCTCATGAGCGGATACATATTTGAATGTATTTAGAAAAATAAACAAATAGGGGTCAGTGTTACAACCAATTAACCAATTCTGAACATTATCGCGAGCCCATTTATACCTGAATATGGCTCATAACACCCCTTGCTCATGACCAAAATCCCTTAACGTGAGTTACGCGCGCGTCGTTCCACTGAGCGTCAGACCCCGTAGAAAAGATCAAAGGATCTTCTTGAGATCCTTTTTTTCTGCGCGTAATCTGCTGCTTGCAAACAAAAAAACCACCGCTACCAGCGGTGGTTTGTTTGCCGGATCAAGAGCTACCAACTCTTTTTCCGAAGGTAACTGGCTTCAGCAGAGCGCAGATACCAAATACTG…
KCG_S0021	Endogenous	GCTAGCGCCACCATGAAGATCGCCGTGCTGTTCTGCTTCTTCCTGCTGATCATCTTCCAGACCGACTTCGGCAAGAACGAGGAAATCCCCAGAAAGCAGCGGCGGAAGATCTACCACAGACGGCTGAGAAAGAGCAGCACCAGCCACAAGCACAGAAGCAACAGACAGCTGGGCATCCAGCAGACCACCGTGTTTACACCTGTGGCCAGACTGCCCATCGTGAACTTCGACTACAGCATGGAAGAGAAGTTCGAGAGCTTCAGCAGCTTCCCCGGCGTGGAAAGCAGCTATAATGTGCTGCCTGGCAAGAAGGGCCACTGCCTGGTTAAGGGCATCACCATGTACAACAAGGCCGTGTGGTCCCCTGAGCCTTGCACCACCTGTCTGTGTTCTGATGGC…	2117	TTTCAATATTATTGAAGCATTTATCAGGGTTATTGTCTCATGAGCGGATACATATTTGAATGTATTTAGAAAAATAAACAAATAGGGGTCAGTGTTACAACCAATTAACCAATTCTGAACATTATCGCGAGCCCATTTATACCTGAATATGGCTCATAACACCCCTTGCTCATGACCAAAATCCCTTAACGTGAGTTACGCGCGCGTCGTTCCACTGAGCGTCAGACCCCGTAGAAAAGATCAAAGGATCTTCTTGAGATCCTTTTTTTCTGCGCGTAATCTGCTGCTTGCAAACAAAAAAACCACCGCTACCAGCGGTGGTTTGTTTGCCGGATCAAGAGCTACCAACTCTTTTTCCGAAGGTAACTGGCTTCAGCAGAGCGCAGATACCAAATACTG…
KCG_S0022	Endogenous	GCTAGCGCCACCATGGGAGCTGCTATTTCTCAGGGCGCTCTGATCGCCATCGTGTGTAATGGCCTCGTGGGCTTTCTGCTGCTGCTCCTGTGGGTTATCCTGTGCTGGGCCTGTCACTCTAGAAGCGCCGATGTGGATAGCCTGAGCGAGAGCAGCCCTAATAGCAGCCCTGGACCTTGTCCTGAGAAAGCCCCTCCACCTCAGAAGCCTAGCCACGAGGGATCTTACCTGCTGCAGCCTGGCGCGCC	248	TTTCAATATTATTGAAGCATTTATCAGGGTTATTGTCTCATGAGCGGATACATATTTGAATGTATTTAGAAAAATAAACAAATAGGGGTCAGTGTTACAACCAATTAACCAATTCTGAACATTATCGCGAGCCCATTTATACCTGAATATGGCTCATAACACCCCTTGCTCATGACCAAAATCCCTTAACGTGAGTTACGCGCGCGTCGTTCCACTGAGCGTCAGACCCCGTAGAAAAGATCAAAGGATCTTCTTGAGATCCTTTTTTTCTGCGCGTAATCTGCTGCTTGCAAACAAAAAAACCACCGCTACCAGCGGTGGTTTGTTTGCCGGATCAAGAGCTACCAACTCTTTTTCCGAAGGTAACTGGCTTCAGCAGAGCGCAGATACCAAATACTG…
KCG_S0023	Endogenous	GCTAGCGCCACCATGCTGGGCATGAACATGCTGCTGATCACCCTGTTTCTGCTGCTGCCCCTGTCTATGCTGAAGGGCGAACCTTGGGAGGGCTGTCTGCACTGTACACACACCACTTGGAGCGGCAACATCATGACCAAGACACTGCTGTACCACACCTACTACGAGTGCGCCGGCACATGTCTGGGCACATGTACCCACAATCAGACCACCTACAGCGTGTGCGATCCTGGCAGAGGCCAGCCTTACGTGTGCTACGATCCTAAGTCTAGCCCCGGCACTTGGTTTGAGATCCACGTGGGCTCTAAAGAGGGCGACCTGCTGAACCAGACCAAGGTGTTCCCTAGCGGCAAGGACGTGGTGTCCCTGTACTTCGATGTGTGCCAGATCGTGTCTATG…	1832	TTTCAATATTATTGAAGCATTTATCAGGGTTATTGTCTCATGAGCGGATACATATTTGAATGTATTTAGAAAAATAAACAAATAGGGGTCAGTGTTACAACCAATTAACCAATTCTGAACATTATCGCGAGCCCATTTATACCTGAATATGGCTCATAACACCCCTTGCTCATGACCAAAATCCCTTAACGTGAGTTACGCGCGCGTCGTTCCACTGAGCGTCAGACCCCGTAGAAAAGATCAAAGGATCTTCTTGAGATCCTTTTTTTCTGCGCGTAATCTGCTGCTTGCAAACAAAAAAACCACCGCTACCAGCGGTGGTTTGTTTGCCGGATCAAGAGCTACCAACTCTTTTTCCGAAGGTAACTGGCTTCAGCAGAGCGCAGATACCAAATACTG…
KCG_S0024	Endogenous	GCTAGCGCCACCATGAAGAAGGTGCTGCTGCTGATCACAGCCATTCTGGCCGTGGCCGTGGGATTCCCTGTGTCTCAGGATCAAGAGAGAGAGAAGCGGAGCATCAGCGATAGCGACGAGCTGGCCTCCGGCTTCTTCGTGTTCCCCTATCCTTATCCATTCCGGCCTCTGCCTCCAATTCCTTTTCCTCGGTTCCCCTGGTTCCGGCGGAACTTCCCTATTCCTATTCCTGAGAGCGCCCCTACCACACCTCTGCCTAGCGAAAAAGGCGCGCC	275	TTTCAATATTATTGAAGCATTTATCAGGGTTATTGTCTCATGAGCGGATACATATTTGAATGTATTTAGAAAAATAAACAAATAGGGGTCAGTGTTACAACCAATTAACCAATTCTGAACATTATCGCGAGCCCATTTATACCTGAATATGGCTCATAACACCCCTTGCTCATGACCAAAATCCCTTAACGTGAGTTACGCGCGCGTCGTTCCACTGAGCGTCAGACCCCGTAGAAAAGATCAAAGGATCTTCTTGAGATCCTTTTTTTCTGCGCGTAATCTGCTGCTTGCAAACAAAAAAACCACCGCTACCAGCGGTGGTTTGTTTGCCGGATCAAGAGCTACCAACTCTTTTTCCGAAGGTAACTGGCTTCAGCAGAGCGCAGATACCAAATACTG…
KCG_S0025	Endogenous	GCTAGCGCCACCATGAAGTTCGTGCCTTGTCTGCTGCTGGTCACCCTGTCTTGTCTGGGAACACTGGGACAAGCCCCTAGACAGAAGCAGGGCTCTACCGGCGAGGAATTCCACTTTCAAACCGGCGGCAGAGACAGCTGCACAATGAGGCCTAGTTCTCTCGGACAAGGCGCTGGCGAAGTGTGGCTGAGAGTGGACTGCAGAAACACCGACCAGACCTATTGGTGCGAGTACAGAGGCCAGCCTAGCATGTGTCAGGCCTTTGCCGCCGATCCTAAGCCTTACTGGAATCAGGCCCTGCAAGAGCTGAGAAGGCTGCACCATGCTTGTCAGGGCGCTCCAGTGCTCAGACCTTCTGTGTGTAGAGAAGCCGGACCTCAGGCTCACATGCAGCAAGTG…	689	TTTCAATATTATTGAAGCATTTATCAGGGTTATTGTCTCATGAGCGGATACATATTTGAATGTATTTAGAAAAATAAACAAATAGGGGTCAGTGTTACAACCAATTAACCAATTCTGAACATTATCGCGAGCCCATTTATACCTGAATATGGCTCATAACACCCCTTGCTCATGACCAAAATCCCTTAACGTGAGTTACGCGCGCGTCGTTCCACTGAGCGTCAGACCCCGTAGAAAAGATCAAAGGATCTTCTTGAGATCCTTTTTTTCTGCGCGTAATCTGCTGCTTGCAAACAAAAAAACCACCGCTACCAGCGGTGGTTTGTTTGCCGGATCAAGAGCTACCAACTCTTTTTCCGAAGGTAACTGGCTTCAGCAGAGCGCAGATACCAAATACTG…
KCG_S0026	Endogenous	GCTAGCGCCACCATGAAGCTGGCCAATTGGTATTGGCTGTCTAGCGCCGTGCTGGCCACATACGGATTTCTGGTGGTGGCCAACAACGAGACAGAGGAAATCAAGGACGAGCGCGCCAAGGATGTGTGTCCTGTGCGACTGGAAAGCCGGGGAAAATGTGAAGAGGCCGGCGAGTGCCCTTATCAGGTTTCACTGCCTCCTCTGACCATCCAGCTGCCTAAGCAGTTCAGCCGGATCGAAGAGGTGTTCAAAGAGGTGCAGAACCTGAAAGAGATCGTCAACAGCCTGAAGAAGTCCTGCCAGGATTGCAAGCTGCAGGCCGACGATAATGGCGACCCTGGCAGAAATGGACTGCTGCTGCCTTCTACTGGTGCCCCTGGCGAAGTGGGCGACAATAGA…	1337	TTTCAATATTATTGAAGCATTTATCAGGGTTATTGTCTCATGAGCGGATACATATTTGAATGTATTTAGAAAAATAAACAAATAGGGGTCAGTGTTACAACCAATTAACCAATTCTGAACATTATCGCGAGCCCATTTATACCTGAATATGGCTCATAACACCCCTTGCTCATGACCAAAATCCCTTAACGTGAGTTACGCGCGCGTCGTTCCACTGAGCGTCAGACCCCGTAGAAAAGATCAAAGGATCTTCTTGAGATCCTTTTTTTCTGCGCGTAATCTGCTGCTTGCAAACAAAAAAACCACCGCTACCAGCGGTGGTTTGTTTGCCGGATCAAGAGCTACCAACTCTTTTTCCGAAGGTAACTGGCTTCAGCAGAGCGCAGATACCAAATACTG…
KCG_S0027	Endogenous	GCTAGCGCCACCATGGTTGCTGCTTTGCTTGGCGGAGGCGGAGAAGCTAGAGGTGGAACAGTTCCTGGTGCCTGGCTGTGTCTGATGGCTCTGCTGCAACTGCTGGGATCTGCCCCTAGAGGATCTGGACTGGCTCACGGCAGAAGGCTGATTTGTTGGCAGGCACTGCTGCAGTGTCAGGGCGAGCCTGAGTGTAGCTACGCCTACAATCAGTACGCCGAGGCCTGTGCTCCTGTTCTGGCTCAACATGGCGGCGGAGATGCTCCAGGTGCAGCTGCTGCTGCTTTTCCTGCCTCTGCCGCCAGCTTTAGCTCTAGATGGCGGTGCCCTAGCCACTGCATCTCTGCCCTGATCCAGCTGAACCACACCAGAAGAGGCCCCGCTCTGGAAGATTGCGAT…	974	TTTCAATATTATTGAAGCATTTATCAGGGTTATTGTCTCATGAGCGGATACATATTTGAATGTATTTAGAAAAATAAACAAATAGGGGTCAGTGTTACAACCAATTAACCAATTCTGAACATTATCGCGAGCCCATTTATACCTGAATATGGCTCATAACACCCCTTGCTCATGACCAAAATCCCTTAACGTGAGTTACGCGCGCGTCGTTCCACTGAGCGTCAGACCCCGTAGAAAAGATCAAAGGATCTTCTTGAGATCCTTTTTTTCTGCGCGTAATCTGCTGCTTGCAAACAAAAAAACCACCGCTACCAGCGGTGGTTTGTTTGCCGGATCAAGAGCTACCAACTCTTTTTCCGAAGGTAACTGGCTTCAGCAGAGCGCAGATACCAAATACTG…
KCG_S0028	Endogenous	GCTAGCGCCACCATGGCTAGAGCTAGAGCTGGTGCTCTGCTGGCTCTTTGGGTTCTGGGAGCTGCTGCTCACCCTCAGTGCCTGGACTTCAGACCTCCATTCAGACCCACACAGCCTCTGAGACTGTGCGCCCAGTACAGCGATTTCGGCTGCTGTGATGAGGGCAGAGATGCCGAGCTGACCAGAAGATTTTGGGCCCTCGCCTCTAGAGTGGATGCCGCTGAATGGGCCGCTTGTGCCGGATATGCTAGAGATCTGCTGTGCCAAGAGTGCAGCCCTTACGCCGCTCACCTGTATGATGCCGAGGATCCCTTCACACCCCTGAGAACAGTTCCCGGCCTGTGCCAGGATTACTGCCTGGACATGTGGCACAAGTGCAGAGGCCTGTTCAGACACCTG…	2366	TTTCAATATTATTGAAGCATTTATCAGGGTTATTGTCTCATGAGCGGATACATATTTGAATGTATTTAGAAAAATAAACAAATAGGGGTCAGTGTTACAACCAATTAACCAATTCTGAACATTATCGCGAGCCCATTTATACCTGAATATGGCTCATAACACCCCTTGCTCATGACCAAAATCCCTTAACGTGAGTTACGCGCGCGTCGTTCCACTGAGCGTCAGACCCCGTAGAAAAGATCAAAGGATCTTCTTGAGATCCTTTTTTTCTGCGCGTAATCTGCTGCTTGCAAACAAAAAAACCACCGCTACCAGCGGTGGTTTGTTTGCCGGATCAAGAGCTACCAACTCTTTTTCCGAAGGTAACTGGCTTCAGCAGAGCGCAGATACCAAATACTG…
KCG_S0029	Endogenous	GCTAGCGCCACCATGGTTCGACTGGCTGCTGAACTGCTGCTGCTCCTGGGACTGCTGCTTCTGACACTGCACATCACAGTGCTGAGAGGCTCTGGCGCTGCTGATGGACCTGATGCTGCAGCCGGAAATGCTTCTCAGGCCCAGCTGCAGAACAACCTGAATGTGGGCAGCGACACCACCAGCGAGACAAGCTTTAGCCTGAGCAAAGAGGCCCCTAGAGAGCACCTGGATCATCAGGCCGCTCACCAGCCTTTTCCACGGCCTAGATTCCGGCAAGAGACAGGACATCCCAGCCTGCAGAGAGACTTCCCCAGAAGCTTTCTGCTGGACCTGCCTAACTTCCCCGACCTGAGCAAGGCCGACATCAACGGACAGAACCCCAACATCCAAGTGACCATC…	1412	TTTCAATATTATTGAAGCATTTATCAGGGTTATTGTCTCATGAGCGGATACATATTTGAATGTATTTAGAAAAATAAACAAATAGGGGTCAGTGTTACAACCAATTAACCAATTCTGAACATTATCGCGAGCCCATTTATACCTGAATATGGCTCATAACACCCCTTGCTCATGACCAAAATCCCTTAACGTGAGTTACGCGCGCGTCGTTCCACTGAGCGTCAGACCCCGTAGAAAAGATCAAAGGATCTTCTTGAGATCCTTTTTTTCTGCGCGTAATCTGCTGCTTGCAAACAAAAAAACCACCGCTACCAGCGGTGGTTTGTTTGCCGGATCAAGAGCTACCAACTCTTTTTCCGAAGGTAACTGGCTTCAGCAGAGCGCAGATACCAAATACTG…
KCG_S0030	Endogenous	GCTAGCGCCACCATGAGGCCTCCAGGCTTCAGAAATTTTCTGCTGCTGGCCTCCAGCCTGCTGTTTGCTGGACTGTCTGCTGTGCCTCAGAGCTTCAGCCCTAGCCTTAGATCTTGGCCTGGCGCCGCTTGTAGACTGTCTAGAGCCGAGAGCGAGAGAAGATGCAGAGCACCTGGACAACCTCCAGGCGCTGCTCTGTGTCATGGCAGAGGCAGATGTGATTGCGGCGTGTGCATTTGCCACGTGACCGAGCCTGGCATGTTCTTTGGACCTCTGTGCGAGTGTCACGAGTGGGTCTGCGAGACATACGATGGCTCTACATGTGCCGGCCACGGCAAGTGTGATTGTGGCAAGTGCAAGTGCGACCAAGGATGGTACGGCGACGCCTGTCAGTACCCC…	1502	TTTCAATATTATTGAAGCATTTATCAGGGTTATTGTCTCATGAGCGGATACATATTTGAATGTATTTAGAAAAATAAACAAATAGGGGTCAGTGTTACAACCAATTAACCAATTCTGAACATTATCGCGAGCCCATTTATACCTGAATATGGCTCATAACACCCCTTGCTCATGACCAAAATCCCTTAACGTGAGTTACGCGCGCGTCGTTCCACTGAGCGTCAGACCCCGTAGAAAAGATCAAAGGATCTTCTTGAGATCCTTTTTTTCTGCGCGTAATCTGCTGCTTGCAAACAAAAAAACCACCGCTACCAGCGGTGGTTTGTTTGCCGGATCAAGAGCTACCAACTCTTTTTCCGAAGGTAACTGGCTTCAGCAGAGCGCAGATACCAAATACTG…
KCG_S0031	Endogenous	GCTAGCGCCACCATGAAGATTCCAGTGCTGCCTGCTGTGGTGCTGCTGAGTCTGCTGGTTCTGCATTCTGCCCAGGGCGCTACACTCGGAGGACCTGAGGAAGAGAGCACCATCGAGAACTACGCCAGCAGACCCGAGGCCTTCAATACCCCTTTCCTGAACATCGACAAGCTGCGGAGCGCCTTCAAGGCCGACGAGTTTCTGAATTGGCACGCCCTGTTCGAGAGCATCAAGCGGAAGCTGCCCTTCCTGAACTGGGACGCCTTTCCTAAGCTGAAGGGCCTGAGAAGCGCCACACCTGACGCTCAAGGCGCGCC	317	TTTCAATATTATTGAAGCATTTATCAGGGTTATTGTCTCATGAGCGGATACATATTTGAATGTATTTAGAAAAATAAACAAATAGGGGTCAGTGTTACAACCAATTAACCAATTCTGAACATTATCGCGAGCCCATTTATACCTGAATATGGCTCATAACACCCCTTGCTCATGACCAAAATCCCTTAACGTGAGTTACGCGCGCGTCGTTCCACTGAGCGTCAGACCCCGTAGAAAAGATCAAAGGATCTTCTTGAGATCCTTTTTTTCTGCGCGTAATCTGCTGCTTGCAAACAAAAAAACCACCGCTACCAGCGGTGGTTTGTTTGCCGGATCAAGAGCTACCAACTCTTTTTCCGAAGGTAACTGGCTTCAGCAGAGCGCAGATACCAAATACTG…
KCG_S0032	Endogenous	GCTAGCGCCACCATGGAAAGCGAGAGAAGCAAGCGGATGGGCAACGCCTGCATTCCCCTGAAGAGAATCGCCTACTTCCTGTGCCTGCTGAGCGCCTTGCTGCTGACAGAGGGAAAGAAGCCCGCCAAGCCTAAGTGTCCTGCCGTGTGCACCTGTACCAAGGACAACGCCCTGTGCGAGAACGCCAGATCTATCCCTAGAACCGTGCCTCCTGACGTGATCAGCCTGTCTTTTGTGCGGAGCGGCTTCACAGAGATCAGCGAGGGCAGCTTCCTGTTCACACCTTCTCTGCAGCTGCTGCTGTTCACCAGCAACAGCTTCGACGTGATCTCCGACGACGCCTTTATCGGCCTGCCTCACCTGGAATACCTGTTCATCGAGAACAACAACATCAAGAGC…	1691	TTTCAATATTATTGAAGCATTTATCAGGGTTATTGTCTCATGAGCGGATACATATTTGAATGTATTTAGAAAAATAAACAAATAGGGGTCAGTGTTACAACCAATTAACCAATTCTGAACATTATCGCGAGCCCATTTATACCTGAATATGGCTCATAACACCCCTTGCTCATGACCAAAATCCCTTAACGTGAGTTACGCGCGCGTCGTTCCACTGAGCGTCAGACCCCGTAGAAAAGATCAAAGGATCTTCTTGAGATCCTTTTTTTCTGCGCGTAATCTGCTGCTTGCAAACAAAAAAACCACCGCTACCAGCGGTGGTTTGTTTGCCGGATCAAGAGCTACCAACTCTTTTTCCGAAGGTAACTGGCTTCAGCAGAGCGCAGATACCAAATACTG…
KCG_S0033	Endogenous	GCTAGCGCCACCATGGCTCTTAGAAGAGGCGGATGTGGTGCCCTGGGACTGCTGCTTTTGCTGCTGGGAGCTGCCTGTCTGATCCCTAGATCTGCTCAAGTGCGGAGACTGGCCAGATGTCCTGCCACCTGTAGCTGCACCAAAGAATCCATCATCTGCGTGGGCAGCAGCTGGGTGCCAAGAATCGTGCCTGGCGATATCAGCAGCCTGAGCCTGGTCAATGGCACCTTCAGCGAGATCAAGGACCGGATGTTCAGCCATCTGCCTAGCCTGCAGCTGCTCCTGCTGAACAGCAACAGCTTCACCATCATCAGGGACGATGCCTTCGCCGGCCTGTTCCACCTGGAATACCTGTTCATCGAGGGCAACAAGATCGAGACAATCAGCCGGAACGCCTTC…	1655	TTTCAATATTATTGAAGCATTTATCAGGGTTATTGTCTCATGAGCGGATACATATTTGAATGTATTTAGAAAAATAAACAAATAGGGGTCAGTGTTACAACCAATTAACCAATTCTGAACATTATCGCGAGCCCATTTATACCTGAATATGGCTCATAACACCCCTTGCTCATGACCAAAATCCCTTAACGTGAGTTACGCGCGCGTCGTTCCACTGAGCGTCAGACCCCGTAGAAAAGATCAAAGGATCTTCTTGAGATCCTTTTTTTCTGCGCGTAATCTGCTGCTTGCAAACAAAAAAACCACCGCTACCAGCGGTGGTTTGTTTGCCGGATCAAGAGCTACCAACTCTTTTTCCGAAGGTAACTGGCTTCAGCAGAGCGCAGATACCAAATACTG…
KCG_S0034	Endogenous	GCTAGCGCCACCATGGCTGGACTTAGAGCTAGAGGTGGACCTGGACCAGGACTGCTGGCTCTGTCTGCTCTGGGCTTCTGTCTGATGCTGCAGGTTTCCGCCAAGCGGCCTCCTAAGACACCTCCTTGTCCTCCAAGCTGCTCCTGTACCAGAGATACCGCCTTCTGCGTGGACAGCAAGGCCGTGCCTAGAAACCTGCCTAGCGAAGTGATCAGCCTGACACTGGTCAATGCCGCCTTCAGCGAAATCCAGGACGGCGCCTTTTCTCATCTGCCCCTGCTGCAGTTCCTGCTGCTGAACAGCAACAAGTTCACCCTGATCGGCGACAACGCCTTCACAGGACTGAGCCATCTGCAGTACCTGTTCATCGAGAACAACGACATCTGGGCCCTGAGCAAG…	1664	TTTCAATATTATTGAAGCATTTATCAGGGTTATTGTCTCATGAGCGGATACATATTTGAATGTATTTAGAAAAATAAACAAATAGGGGTCAGTGTTACAACCAATTAACCAATTCTGAACATTATCGCGAGCCCATTTATACCTGAATATGGCTCATAACACCCCTTGCTCATGACCAAAATCCCTTAACGTGAGTTACGCGCGCGTCGTTCCACTGAGCGTCAGACCCCGTAGAAAAGATCAAAGGATCTTCTTGAGATCCTTTTTTTCTGCGCGTAATCTGCTGCTTGCAAACAAAAAAACCACCGCTACCAGCGGTGGTTTGTTTGCCGGATCAAGAGCTACCAACTCTTTTTCCGAAGGTAACTGGCTTCAGCAGAGCGCAGATACCAAATACTG…
KCG_S0035	Endogenous	GCTAGCGCCACCATGGGCGGAGCTGGAATTCTGCTTCTTCTTCTGGCTGGTGCTGGCGTGGTGGTTGCTTGGAGGCCGCCTAAGGGAAAGTGCCCTCTGAGATGCAGCTGTAGCAAGGATAGCGCCCTGTGCGAGGGATCTCCTGACCTGCCTGTGTCTTTCAGCCCTACACTGCTGTCTCTGTCTCTCGTGCGAACAGGCGTGACACAGCTGAAGGCCGGCAGCTTTCTGAGAATCCCTAGCCTGCATCTGCTGCTGTTCACCAGCAACAGCTTCAGCGTGATCGAGGATGATGCCTTCGCCGGCCTGAGCCATCTGCAGTACCTGTTCATCGAGGACAACGAGATCGGCAGCATCAGCAAGAATGCCCTGAGAGGCCTGAGATCTCTGACACACCTG…	1631	TTTCAATATTATTGAAGCATTTATCAGGGTTATTGTCTCATGAGCGGATACATATTTGAATGTATTTAGAAAAATAAACAAATAGGGGTCAGTGTTACAACCAATTAACCAATTCTGAACATTATCGCGAGCCCATTTATACCTGAATATGGCTCATAACACCCCTTGCTCATGACCAAAATCCCTTAACGTGAGTTACGCGCGCGTCGTTCCACTGAGCGTCAGACCCCGTAGAAAAGATCAAAGGATCTTCTTGAGATCCTTTTTTTCTGCGCGTAATCTGCTGCTTGCAAACAAAAAAACCACCGCTACCAGCGGTGGTTTGTTTGCCGGATCAAGAGCTACCAACTCTTTTTCCGAAGGTAACTGGCTTCAGCAGAGCGCAGATACCAAATACTG…
KCG_S0036	Endogenous	GCTAGCGCCACCATGAGAGTGGTCACCATCGTGATCCTGCTGTGCTTCTGTAAAGCCGCCGAGCTGAGAAAGGCCTCTCCTGGATCTGTGCGGAGCAGAGTGAATCATGGTAGAGCCGGCGGAGGCAGACGGGGCTCTAATCCTGTGAAAAGATATGCCCCTGGCCTGCCTTGCGACGTGTACACATACCTGCACGAGAAGTACCTGGACTGCCAAGAGCGGAAGCTGGTGTATGTTCTGCCTGGCTGGCCTCAGGATCTGCTGCATATGCTGCTGGCCCGGAACAAGATCAGAACCCTGAAGAACAACATGTTCAGCAAGTTCAAGAAGCTGAAGTCCCTGGACCTGCAGCAGAACGAGATCAGCAAGATCGAGAGCGAGGCCTTCTTCGGCCTGAAC…	1343	TTTCAATATTATTGAAGCATTTATCAGGGTTATTGTCTCATGAGCGGATACATATTTGAATGTATTTAGAAAAATAAACAAATAGGGGTCAGTGTTACAACCAATTAACCAATTCTGAACATTATCGCGAGCCCATTTATACCTGAATATGGCTCATAACACCCCTTGCTCATGACCAAAATCCCTTAACGTGAGTTACGCGCGCGTCGTTCCACTGAGCGTCAGACCCCGTAGAAAAGATCAAAGGATCTTCTTGAGATCCTTTTTTTCTGCGCGTAATCTGCTGCTTGCAAACAAAAAAACCACCGCTACCAGCGGTGGTTTGTTTGCCGGATCAAGAGCTACCAACTCTTTTTCCGAAGGTAACTGGCTTCAGCAGAGCGCAGATACCAAATACTG…
KCG_S0037	Endogenous	GCTAGCGCCACCATGAAGATCTTTCTGCCTGTGCTGCTGGCCGCTCTGCTGGGAGTTGAAAGGGCTTCCAGCCTGATGTGCTTCAGCTGCCTGAACCAGAAGTCCAACCTGTACTGCCTGAAGCCTACCATCTGCAGCGACCAGGACAACTACTGTGTGACAGTGTCTGCCAGCGCCGGCATCGGCAATCTGGTTACATTTGGCCACAGCCTGAGCAAGACATGCAGCCCCGCTTGTCCTATTCCTGAGGGCGTTAACGTGGGCGTCGCCAGCATGGGAATCAGCTGCTGTCAGAGCTTCCTGTGCAACTTCTCTGGCGCGCC	323	TTTCAATATTATTGAAGCATTTATCAGGGTTATTGTCTCATGAGCGGATACATATTTGAATGTATTTAGAAAAATAAACAAATAGGGGTCAGTGTTACAACCAATTAACCAATTCTGAACATTATCGCGAGCCCATTTATACCTGAATATGGCTCATAACACCCCTTGCTCATGACCAAAATCCCTTAACGTGAGTTACGCGCGCGTCGTTCCACTGAGCGTCAGACCCCGTAGAAAAGATCAAAGGATCTTCTTGAGATCCTTTTTTTCTGCGCGTAATCTGCTGCTTGCAAACAAAAAAACCACCGCTACCAGCGGTGGTTTGTTTGCCGGATCAAGAGCTACCAACTCTTTTTCCGAAGGTAACTGGCTTCAGCAGAGCGCAGATACCAAATACTG…
KCG_S0038	Endogenous	GCTAGCGCCACCATGCTGCCTGCCGCTATGAAAGGACTGGGACTTGCTCTGCTGGCCGTGCTGCTTTGTTCTGCTCCTGCTCATGGCCTGTGGTGCCAGGATTGCACCCTGACCACAAACAGCAGCCACTGCACCCCTAAGCAGTGCCAGCCTTCTGATACAGTGTGTGCCAGCGTGCGGATCACCGATCCTAGCAGCAGCAGAAAGGACCACAGCGTGAACAAGATGTGCGCCAGCAGCTGCGACTTCGTGAAGAGACACTTCTTCAGCGACTACCTGATGGGCTTCATCAACAGCGGCATCCTGAAGGTGGACGTGGACTGCTGCGAGAAGGATCTGTGTAATGGCGCTGCCGGTGGCGCGCC	365	TTTCAATATTATTGAAGCATTTATCAGGGTTATTGTCTCATGAGCGGATACATATTTGAATGTATTTAGAAAAATAAACAAATAGGGGTCAGTGTTACAACCAATTAACCAATTCTGAACATTATCGCGAGCCCATTTATACCTGAATATGGCTCATAACACCCCTTGCTCATGACCAAAATCCCTTAACGTGAGTTACGCGCGCGTCGTTCCACTGAGCGTCAGACCCCGTAGAAAAGATCAAAGGATCTTCTTGAGATCCTTTTTTTCTGCGCGTAATCTGCTGCTTGCAAACAAAAAAACCACCGCTACCAGCGGTGGTTTGTTTGCCGGATCAAGAGCTACCAACTCTTTTTCCGAAGGTAACTGGCTTCAGCAGAGCGCAGATACCAAATACTG…
KCG_S0039	Endogenous	GCTAGCGCCACCATGTCTTTTCTGGAAGAAGCCAGAGCCGCTGGCAGAGCTGTTGTTCTGGCTCTGGTTCTGCTGCTGCTTCCTGCTGTGCCTGTGGGAGCTTCTGTTCCTCCTAGACCTCTGCTGCCTCTGCAGCCTGGAATGCCTCATGTGTGCGCCGAGCAAGAGCTGACACTTGTTGGTAGAAGGCAGCCTTGTGTGCAGGCCCTGTCTCATACAGTGCCTGTGTGGAAAGCCGGCTGTGGATGGCAAGCTTGGTGCGTGGGACACGAGAGAAGAACCGTGTACTACATGGGCTACCGCCAGGTGTACACAACCGAGGCCAGAACCGTGCTGAGATGCTGTAGAGGATGGATGCAGCAGCCCGATGAGGAAGGATGTCTGTCTGCCGAGTGTAGC…	4643	TTTCAATATTATTGAAGCATTTATCAGGGTTATTGTCTCATGAGCGGATACATATTTGAATGTATTTAGAAAAATAAACAAATAGGGGTCAGTGTTACAACCAATTAACCAATTCTGAACATTATCGCGAGCCCATTTATACCTGAATATGGCTCATAACACCCCTTGCTCATGACCAAAATCCCTTAACGTGAGTTACGCGCGCGTCGTTCCACTGAGCGTCAGACCCCGTAGAAAAGATCAAAGGATCTTCTTGAGATCCTTTTTTTCTGCGCGTAATCTGCTGCTTGCAAACAAAAAAACCACCGCTACCAGCGGTGGTTTGTTTGCCGGATCAAGAGCTACCAACTCTTTTTCCGAAGGTAACTGGCTTCAGCAGAGCGCAGATACCAAATACTG…
KCG_S0040	Endogenous	GCTAGCGCCACCATGGGATTTCCAGCTGCTGCTCTGCTGTGTGCCCTGTGTTGTGGACTTCTGGCTCCTGCCGCCAGAGCCGGCTATAGCGAAGAGAGATGTTCTTGGAGAGGCAGCGGCCTGACACAAGAGCCTGGATCTGTTGGACAGCTGGCCCTTGCTTGTGCTGAAGGTGCCGTGGAATGGCTGTATCCTGCTGGCGCTCTGAGACTGACACTCGGCGGACCTGATCCTAGAGCCAGACCTGGAATTGCCTGCCTGAGGCCTGTTAGACCTTTTGCCGGCGCTCAGGTGTTCGCTGAAAGAGCTGGCGGAGCACTGGAACTGTTGCTGGCTGAAGGACCTGGACCTGCCGGCGGAAGATGTGTTAGATGGGGACCTAGAGAGCGGAGAGCCCTG…	899	TTTCAATATTATTGAAGCATTTATCAGGGTTATTGTCTCATGAGCGGATACATATTTGAATGTATTTAGAAAAATAAACAAATAGGGGTCAGTGTTACAACCAATTAACCAATTCTGAACATTATCGCGAGCCCATTTATACCTGAATATGGCTCATAACACCCCTTGCTCATGACCAAAATCCCTTAACGTGAGTTACGCGCGCGTCGTTCCACTGAGCGTCAGACCCCGTAGAAAAGATCAAAGGATCTTCTTGAGATCCTTTTTTTCTGCGCGTAATCTGCTGCTTGCAAACAAAAAAACCACCGCTACCAGCGGTGGTTTGTTTGCCGGATCAAGAGCTACCAACTCTTTTTCCGAAGGTAACTGGCTTCAGCAGAGCGCAGATACCAAATACTG…
KCG_S0041	Endogenous	GCTAGCGCCACCATGCCTGCTGGTAGAGCCGCTAGAACATGTGCCCTGCTGGCTCTGTGTTTGCTTGGAGCCGGTGCTCAGGATTTCGGCCCCACCAGATTCATCTGTACCAGCGTGCCAGTGGACGCCGATATGTGTGCTGCTTCTGTTGCTGCCGGCGGAGCCGAGGAACTGAGATCTTCTGTTCTGCAGCTGCGGGAAACCGTCCTGCAGCAGAAAGAAACCATCCTGTCTCAGAAAGAGACAATCAGAGAGCTGACCGCCAAGCTGGGCAGATGCGAGTCTCAGTCTACACTTGATCCTGGCGCTGGCGAAGCTAGAGCTGGCGGAGGAAGAAAACAGCCCGGCAGCGGAAAGAACACAATGGGCGATCTGAGCAGAACCCCTGCCGCCGAAACA…	1316	TTTCAATATTATTGAAGCATTTATCAGGGTTATTGTCTCATGAGCGGATACATATTTGAATGTATTTAGAAAAATAAACAAATAGGGGTCAGTGTTACAACCAATTAACCAATTCTGAACATTATCGCGAGCCCATTTATACCTGAATATGGCTCATAACACCCCTTGCTCATGACCAAAATCCCTTAACGTGAGTTACGCGCGCGTCGTTCCACTGAGCGTCAGACCCCGTAGAAAAGATCAAAGGATCTTCTTGAGATCCTTTTTTTCTGCGCGTAATCTGCTGCTTGCAAACAAAAAAACCACCGCTACCAGCGGTGGTTTGTTTGCCGGATCAAGAGCTACCAACTCTTTTTCCGAAGGTAACTGGCTTCAGCAGAGCGCAGATACCAAATACTG…
KCG_S0042	Endogenous	GCTAGCGCCACCATGCTTGCTCTGCTGGCTGCTTCTGTTGCTCTGGCTGTTGCTGCAGGCGCTCAGGATTCTCCTGCTCCTGGCAGCAGATTCGTGTGTACAGCTCTGCCTCCTGAAGCCGTGCATGCTGGATGTCCTCTGCCTGCCATGCCTATGCAAGGCGGAGCACAGTCTCCCGAGGAAGAACTGAGAGCTGCTGTGCTGCAGCTGAGAGAAACCGTGGTGCAGCAGAAAGAGACACTGGGAGCCCAGAGAGAGGCCATCAGAGAGCTGACAGGCAAGCTGGCCAGATGTGAAGGACTGGCTGGTGGAAAAGCTAGAGGCGCTGGCGCCACAGGCAAGGATACAATGGGAGATCTGCCCAGAGATCCCGGCCATGTGGTGGAACAGCTGAGCAGA…	1313	TTTCAATATTATTGAAGCATTTATCAGGGTTATTGTCTCATGAGCGGATACATATTTGAATGTATTTAGAAAAATAAACAAATAGGGGTCAGTGTTACAACCAATTAACCAATTCTGAACATTATCGCGAGCCCATTTATACCTGAATATGGCTCATAACACCCCTTGCTCATGACCAAAATCCCTTAACGTGAGTTACGCGCGCGTCGTTCCACTGAGCGTCAGACCCCGTAGAAAAGATCAAAGGATCTTCTTGAGATCCTTTTTTTCTGCGCGTAATCTGCTGCTTGCAAACAAAAAAACCACCGCTACCAGCGGTGGTTTGTTTGCCGGATCAAGAGCTACCAACTCTTTTTCCGAAGGTAACTGGCTTCAGCAGAGCGCAGATACCAAATACTG…
KCG_S0043	Endogenous	GCTAGCGCCACCATGGGACTGAAGCTGAATGGCCGGTACATCAGCCTGATCCTGGCCGTGCAGATTGCCTATCTGGTGCAGGCTGTTAGAGCCGCCGGAAAGTGTGATGCCGTGTTCAAGGGCTTCAGCGACTGCCTGCTGAAGCTGGGCGACAGCATGGCCAATTATCCCCAGGGCCTCGACGACAAGACCAACATCAAGACCGTGTGCACCTACTGGGAAGATTTCCACAGCTGCACCGTGACAGCCCTGACCGATTGTCAAGAGGGCGCCAAGGACATGTGGGACAAGCTGCGGAAAGAGAGCAAGAACCTGAACATCCAGGGCAGCCTGTTCGAGCTGTGTGGCTCTGGAAACGGTGGCGCGCC	368	TTTCAATATTATTGAAGCATTTATCAGGGTTATTGTCTCATGAGCGGATACATATTTGAATGTATTTAGAAAAATAAACAAATAGGGGTCAGTGTTACAACCAATTAACCAATTCTGAACATTATCGCGAGCCCATTTATACCTGAATATGGCTCATAACACCCCTTGCTCATGACCAAAATCCCTTAACGTGAGTTACGCGCGCGTCGTTCCACTGAGCGTCAGACCCCGTAGAAAAGATCAAAGGATCTTCTTGAGATCCTTTTTTTCTGCGCGTAATCTGCTGCTTGCAAACAAAAAAACCACCGCTACCAGCGGTGGTTTGTTTGCCGGATCAAGAGCTACCAACTCTTTTTCCGAAGGTAACTGGCTTCAGCAGAGCGCAGATACCAAATACTG…
KCG_S0044	Endogenous	GCTAGCGCCACCATGATGCGGTGCTGTCGGAGAAGATGCTGCTGCAGACAACCTCCTCATGCTCTGAGGCCTCTGCTGCTGCTTCCTCTGGTTCTTCTGCCTCCACTTGCTGCAGCCGCCGCTGGACCTAATAGATGCGATACCATCTACCAGGGCTTCGCCGAGTGCCTGATCAGACTGGGCGATTCTATGGGCAGAGGCGGCGAGCTGGAAACCATCTGCAGAAGCTGGAACGATTTCCACGCCTGTGCCAGCCAGGTGCTGTCTGGATGTCCTGAAGAAGCCGCTGCCGTTTGGGAGTCTCTCCAGCAAGAAGCCAGACAGGCCCCTAGACCTAACAACCTGCATACACTGTGTGGCGCCCCTGTGCACGTTCGCGAAAGAGGAACAGGCAGCGAG…	437	TTTCAATATTATTGAAGCATTTATCAGGGTTATTGTCTCATGAGCGGATACATATTTGAATGTATTTAGAAAAATAAACAAATAGGGGTCAGTGTTACAACCAATTAACCAATTCTGAACATTATCGCGAGCCCATTTATACCTGAATATGGCTCATAACACCCCTTGCTCATGACCAAAATCCCTTAACGTGAGTTACGCGCGCGTCGTTCCACTGAGCGTCAGACCCCGTAGAAAAGATCAAAGGATCTTCTTGAGATCCTTTTTTTCTGCGCGTAATCTGCTGCTTGCAAACAAAAAAACCACCGCTACCAGCGGTGGTTTGTTTGCCGGATCAAGAGCTACCAACTCTTTTTCCGAAGGTAACTGGCTTCAGCAGAGCGCAGATACCAAATACTG…
KCG_S0045	Endogenous	GCTAGCGCCACCATGGCTCTGCACATCCACGAAGCCTGTATCCTGCTGCTGGTCATCCCTGGCCTGGTTACATCTGCCGCCATCAGCCACGAGGATTATCCTGCCGATGAGGGCGACCAGATCAGCAGCAACGACAACCTGATCTTCGACGACTACAGAGGCAAGGGCTGTGTGGACGATAGCGGCTTTGTGTACAAGCTGGGCGAGAGATTCTTCCCAGGCCACAGCAATTGCCCTTGCGTGTGTGCTCTGGATGGCCCTGTGTGTGATCAGCCTGAGTGCCCCAAGATTCACCCCAAGTGCACCAAGGTGGAACACAACGGCTGCTGCCCCGAGTGCAAAGAAGTGAAGAACTTCTGCGAGTACCACGGCAAGAACTACAAGATCCTGGAAGAGTTC…	686	TTTCAATATTATTGAAGCATTTATCAGGGTTATTGTCTCATGAGCGGATACATATTTGAATGTATTTAGAAAAATAAACAAATAGGGGTCAGTGTTACAACCAATTAACCAATTCTGAACATTATCGCGAGCCCATTTATACCTGAATATGGCTCATAACACCCCTTGCTCATGACCAAAATCCCTTAACGTGAGTTACGCGCGCGTCGTTCCACTGAGCGTCAGACCCCGTAGAAAAGATCAAAGGATCTTCTTGAGATCCTTTTTTTCTGCGCGTAATCTGCTGCTTGCAAACAAAAAAACCACCGCTACCAGCGGTGGTTTGTTTGCCGGATCAAGAGCTACCAACTCTTTTTCCGAAGGTAACTGGCTTCAGCAGAGCGCAGATACCAAATACTG…
KCG_S0046	Endogenous	GCTAGCGCCACCATGTCTCCACCTCTGCTGAAACTGGGAGCCGTGCTGAGCACAATGGCCATGATCAGCAACTGGATGAGCCAGACACTGCCTAGCCTCGTGGGCCTGAATACCACCAGACTGAGCACCCCTGACACACTGACCCAGATCAGCCCCAAAGAAGGCTGGCAGGTCTACAGCTCTGCCCAGGATCCAGACGGCAGATGTATCTGTACAGTGGTGGCCCCTGAGCAGAACCTGTGCAGCAGAGATGCCAAGAGCAGACAGCTGAGGCAGCTGCTGGAAAAGGTGCAGAACATGAGCCAGTCCATCGAGGTGCTGAACCTGAGAACCCAGCGGGACTTCCAGTACGTGCTGAAGATGGAAACCCAGATGAAGGGCCTGAAGGCCAAGTTCAGA…	1454	TTTCAATATTATTGAAGCATTTATCAGGGTTATTGTCTCATGAGCGGATACATATTTGAATGTATTTAGAAAAATAAACAAATAGGGGTCAGTGTTACAACCAATTAACCAATTCTGAACATTATCGCGAGCCCATTTATACCTGAATATGGCTCATAACACCCCTTGCTCATGACCAAAATCCCTTAACGTGAGTTACGCGCGCGTCGTTCCACTGAGCGTCAGACCCCGTAGAAAAGATCAAAGGATCTTCTTGAGATCCTTTTTTTCTGCGCGTAATCTGCTGCTTGCAAACAAAAAAACCACCGCTACCAGCGGTGGTTTGTTTGCCGGATCAAGAGCTACCAACTCTTTTTCCGAAGGTAACTGGCTTCAGCAGAGCGCAGATACCAAATACTG…
KCG_S0047	Endogenous	GCTAGCGCCACCATGATGGTTGCTCTGAGAGGCGCTTCTGCCCTGCTGGTTCTGTTTCTGGCTGCCTTTCTGCCTCCTCCACAGTGTACACAGGATCCCGCCATGGTGCACTACATCTACCAGCGGTTCAGAGTGCTGGAACAGGGCCTCGAGAAATGCACACAGGCCACCAGAGCCTACATCCAAGAGTTTCAAGAGTTCAGCAAGAACATCAGCGTGATGCTGGGCAGATGCCAGACCTACACCAGCGAGTATAAGAGCGCCGTGGGCAATCTGGCCCTGAGAGTGGAAAGAGCCCAGAGAGAGATCGACTACATCCAGTACCTGCGCGAGGCCGATGAGTGCATCGAGAGCGAAGATAAGACCCTGGCCGAGATGCTGCTGCAAGAGGCCGAGGAA…	1226	TTTCAATATTATTGAAGCATTTATCAGGGTTATTGTCTCATGAGCGGATACATATTTGAATGTATTTAGAAAAATAAACAAATAGGGGTCAGTGTTACAACCAATTAACCAATTCTGAACATTATCGCGAGCCCATTTATACCTGAATATGGCTCATAACACCCCTTGCTCATGACCAAAATCCCTTAACGTGAGTTACGCGCGCGTCGTTCCACTGAGCGTCAGACCCCGTAGAAAAGATCAAAGGATCTTCTTGAGATCCTTTTTTTCTGCGCGTAATCTGCTGCTTGCAAACAAAAAAACCACCGCTACCAGCGGTGGTTTGTTTGCCGGATCAAGAGCTACCAACTCTTTTTCCGAAGGTAACTGGCTTCAGCAGAGCGCAGATACCAAATACTG…
KCG_S0048	Endogenous	GCTAGCGCCACCATGGCTGCTGCTGCATTGCCTCCTAGACCTCTGCTGCTTCTGCCTCTGGTGCTGCTGCTTAGCGGCAGACCTACAAGAGCCGATAGCAAGGTGTTCGGCGACCTGGATCAAGTGCGGATGACAAGCGAGGGCAGCGACTGCAGATGCAAGTGCATCATGAGGCCCCTGAGCAAGGATGCCTGTTCTAGAGTCAGAAGCGGCAGGGCCAGAGTCGAGGACTTTTACACCGTGGAAACCGTGTCCAGCGGCACCGATTGCAGATGTTCTTGTACAGCCCCTCCTAGCTCTCTGAACCCCTGCGAGAACGAGTGGAAGATGGAAAAGCTGAAGAAGCAGGCCCCAGAGCTGCTGAAGCTGCAGTCTATGGTTGACCTGCTGGAAGGCACC…	1976	TTTCAATATTATTGAAGCATTTATCAGGGTTATTGTCTCATGAGCGGATACATATTTGAATGTATTTAGAAAAATAAACAAATAGGGGTCAGTGTTACAACCAATTAACCAATTCTGAACATTATCGCGAGCCCATTTATACCTGAATATGGCTCATAACACCCCTTGCTCATGACCAAAATCCCTTAACGTGAGTTACGCGCGCGTCGTTCCACTGAGCGTCAGACCCCGTAGAAAAGATCAAAGGATCTTCTTGAGATCCTTTTTTTCTGCGCGTAATCTGCTGCTTGCAAACAAAAAAACCACCGCTACCAGCGGTGGTTTGTTTGCCGGATCAAGAGCTACCAACTCTTTTTCCGAAGGTAACTGGCTTCAGCAGAGCGCAGATACCAAATACTG…
KCG_S0049	Endogenous	GCTAGCGCCACCATGGCTAAACCTAGACTGCTGGTGCTGTACTTCGCCCTGATTGTGGTGCCTGCCTGGGTGTCCTCTATCGTGCTGACAGGCACAAGCGAGCCTCCAGATGCTCAGACAGTGGCTCCTGCCGAAGATGAGACACTGCAGAACGAGGCCGACAATCAAGAGAACGTGCTGAGCCAGCTGCTGGGCGACTATGACAAAGTGAAGGCCATGAGCGAGGGCAGCGACTGCCAGTGTAAATGTGTTGTGCGGCCTCTGGGCAGAGATGCCTGCCAAAGAATCAATGCCGGCGCTTCCCGGAAAGAGGACTTCTACACCGTCGAGACAATCACCAGCGGCAGCAGCTGCAAATGTGCCTGTGTTGCTCCTCCTAGCGCTCTGAATCCTTGCGAG…	2270	TTTCAATATTATTGAAGCATTTATCAGGGTTATTGTCTCATGAGCGGATACATATTTGAATGTATTTAGAAAAATAAACAAATAGGGGTCAGTGTTACAACCAATTAACCAATTCTGAACATTATCGCGAGCCCATTTATACCTGAATATGGCTCATAACACCCCTTGCTCATGACCAAAATCCCTTAACGTGAGTTACGCGCGCGTCGTTCCACTGAGCGTCAGACCCCGTAGAAAAGATCAAAGGATCTTCTTGAGATCCTTTTTTTCTGCGCGTAATCTGCTGCTTGCAAACAAAAAAACCACCGCTACCAGCGGTGGTTTGTTTGCCGGATCAAGAGCTACCAACTCTTTTTCCGAAGGTAACTGGCTTCAGCAGAGCGCAGATACCAAATACTG…
KCG_S0050	Endogenous	GCTAGCGCCACCATGGGACCTTCTACACCCCTGCTGATCCTGTTCCTGCTGTCTTGGAGTGGACCTCTGCAGGGACAGCAGCACCACCTGGTCGAGTACATGGAAAGAAGGCTGGCCGCTCTGGAAGAAAGACTGGCCCAGTGTCAGGACCAGTCTAGCAGACATGCCGCCGAGCTGCGGGACTTCAAGAACAAAATGCTGCCCCTGCTGGAAGTGGCCGAGAAAGAGAGAGAGGCCCTGAGAACCGAGGCCGATACAATCAGCGGCAGAGTGGACAGACTGGAAAGAGAGGTGGACTACCTGGAAACACAGAACCCCGCTCTGCCCTGCGTGGAATTCGATGAGAAAGTTACAGGCGGCCCTGGCACCAAAGGCAAGGGCAGAAGAAACGAGAAGTAC…	1238	TTTCAATATTATTGAAGCATTTATCAGGGTTATTGTCTCATGAGCGGATACATATTTGAATGTATTTAGAAAAATAAACAAATAGGGGTCAGTGTTACAACCAATTAACCAATTCTGAACATTATCGCGAGCCCATTTATACCTGAATATGGCTCATAACACCCCTTGCTCATGACCAAAATCCCTTAACGTGAGTTACGCGCGCGTCGTTCCACTGAGCGTCAGACCCCGTAGAAAAGATCAAAGGATCTTCTTGAGATCCTTTTTTTCTGCGCGTAATCTGCTGCTTGCAAACAAAAAAACCACCGCTACCAGCGGTGGTTTGTTTGCCGGATCAAGAGCTACCAACTCTTTTTCCGAAGGTAACTGGCTTCAGCAGAGCGCAGATACCAAATACTG…
KCG_S0051	Endogenous	GCTAGCGCCACCATGAGATTCTTTTGCGCCAGATGCTGCAGCTTCGGCCCTGAAATGCCTGCTGTTCAACTGCTGCTGCTGGCCTGTCTCGTGTGGGATGTTGGAGCTAGAACAGCCCAGCTGAGAAAGGCCAACGATCAGAGCGGCAGATGCCAGTACACCTTCAGCGTGGCCTCTCCAAATGAGAGCAGCTGTCCTGAGCAGAGCCAGGCCATGAGCGTGATCCACAACCTGCAGAGAGACAGCAGCACCCAGAGACTGGACCTGGAAGCCACAAAGGCCAGACTGAGCAGCCTGGAATCTCTGCTGCACCAGCTGACACTGGATCAGGCCGCCAGACCTCAAGAGACACAAGAGGGACTCCAGAGAGAGCTGGGCACCCTGAGAAGAGAGAGGGAC…	1532	TTTCAATATTATTGAAGCATTTATCAGGGTTATTGTCTCATGAGCGGATACATATTTGAATGTATTTAGAAAAATAAACAAATAGGGGTCAGTGTTACAACCAATTAACCAATTCTGAACATTATCGCGAGCCCATTTATACCTGAATATGGCTCATAACACCCCTTGCTCATGACCAAAATCCCTTAACGTGAGTTACGCGCGCGTCGTTCCACTGAGCGTCAGACCCCGTAGAAAAGATCAAAGGATCTTCTTGAGATCCTTTTTTTCTGCGCGTAATCTGCTGCTTGCAAACAAAAAAACCACCGCTACCAGCGGTGGTTTGTTTGCCGGATCAAGAGCTACCAACTCTTTTTCCGAAGGTAACTGGCTTCAGCAGAGCGCAGATACCAAATACTG…
KCG_S0052	Endogenous	GCTAGCGCCACCATGTCTGTGCCTCTGCTGAAGATCGGCGTGGTGCTGAGCACAATGGCCATGATCACCAACTGGATGAGCCAGACACTGCCTAGCCTCGTGGGCCTGAATACCACAAAACTGTCTGCCGCTGGCGGCGGAACCCTGGATAGATCTACAGGCGTGCTGCCCACCAATCCTGAGGAAAGCTGGCAGGTTTACAGCAGCGCCCAGGATAGCGAGGGCAGATGTATCTGTACAGTGGTGGCCCCTCAGCAGACCATGTGTAGCAGAGATGCCCGGACCAAGCAGCTGAGACAGCTGCTGGAAAAGGTGCAGAACATGAGCCAGTCCATCGAGGTGCTGGACAGAAGAACCCAGAGGGACCTGCAGTACGTGGAAAAGATGGAAAACCAGATG…	1475	TTTCAATATTATTGAAGCATTTATCAGGGTTATTGTCTCATGAGCGGATACATATTTGAATGTATTTAGAAAAATAAACAAATAGGGGTCAGTGTTACAACCAATTAACCAATTCTGAACATTATCGCGAGCCCATTTATACCTGAATATGGCTCATAACACCCCTTGCTCATGACCAAAATCCCTTAACGTGAGTTACGCGCGCGTCGTTCCACTGAGCGTCAGACCCCGTAGAAAAGATCAAAGGATCTTCTTGAGATCCTTTTTTTCTGCGCGTAATCTGCTGCTTGCAAACAAAAAAACCACCGCTACCAGCGGTGGTTTGTTTGCCGGATCAAGAGCTACCAACTCTTTTTCCGAAGGTAACTGGCTTCAGCAGAGCGCAGATACCAAATACTG…
KCG_S0053	Endogenous	GCTAGCGCCACCATGTGGCCTCTTACAGTTCCTCCTCCACTGCTCCTGCTGCTGTGTTCTGGACTGGCCGGACAGACCCTGTTTCAGAATCCTGAGGAAGGCTGGCAGCTGTACACAAGCGCTCAGGCCCCTGATGGCAAGTGCATCTGTACAGCCGTGATTCCCGCTCAGAGCACCTGTAGCAGAGATGGCAGAAGCCGGGAACTGCGGCAGCTGATGGAAAAGGTGCAGAACGTGTCCCAGAGCATGGAAGTGCTGGAACTGAGAACCTACCGGGACCTGCAGTACGTCAGAGGCATGGAAACCCTGATGAGAAGCCTGGACGCCAGACTGAGAGCCGCCGATGGATCTCTGAGCGCCAAGAGCTTCCAAGAGCTGAAGGACAGAATGACCGAGCTG…	1382	TTTCAATATTATTGAAGCATTTATCAGGGTTATTGTCTCATGAGCGGATACATATTTGAATGTATTTAGAAAAATAAACAAATAGGGGTCAGTGTTACAACCAATTAACCAATTCTGAACATTATCGCGAGCCCATTTATACCTGAATATGGCTCATAACACCCCTTGCTCATGACCAAAATCCCTTAACGTGAGTTACGCGCGCGTCGTTCCACTGAGCGTCAGACCCCGTAGAAAAGATCAAAGGATCTTCTTGAGATCCTTTTTTTCTGCGCGTAATCTGCTGCTTGCAAACAAAAAAACCACCGCTACCAGCGGTGGTTTGTTTGCCGGATCAAGAGCTACCAACTCTTTTTCCGAAGGTAACTGGCTTCAGCAGAGCGCAGATACCAAATACTG…
KCG_S0054	Endogenous	GCTAGCGCCACCATGAGGCCTGGACTGTCTTTTCTGCTGGCCCTGCTGTTCTTTCTGGGCCAAGCTGCTGGCGATCTGGGAGATGTTGGCCCTCCTATTCCATCTCCTGGCTTCAGCAGTTTCCCTGGCGTGGACAGCAGCAGCTCCTTTAGCTCTAGCAGCAGAAGCGGCAGCTCCAGCTCTAGATCTCTTGGCTCTGGCGGCAGCGTGTCCCAGCTGTTTAGCAATTTCACCGGCTCCGTGGACGACAGAGGCACCTGTCAGTGTTCCGTGTCTCTGCCCGATACCACCTTTCCTGTGGACAGAGTGGAAAGACTGGAATTCACAGCCCACGTGCTGAGCCAGAAGTTCGAGAAAGAACTGAGCAAAGTGCGCGAGTACGTGCAGCTGATCTCCGTG…	1550	TTTCAATATTATTGAAGCATTTATCAGGGTTATTGTCTCATGAGCGGATACATATTTGAATGTATTTAGAAAAATAAACAAATAGGGGTCAGTGTTACAACCAATTAACCAATTCTGAACATTATCGCGAGCCCATTTATACCTGAATATGGCTCATAACACCCCTTGCTCATGACCAAAATCCCTTAACGTGAGTTACGCGCGCGTCGTTCCACTGAGCGTCAGACCCCGTAGAAAAGATCAAAGGATCTTCTTGAGATCCTTTTTTTCTGCGCGTAATCTGCTGCTTGCAAACAAAAAAACCACCGCTACCAGCGGTGGTTTGTTTGCCGGATCAAGAGCTACCAACTCTTTTTCCGAAGGTAACTGGCTTCAGCAGAGCGCAGATACCAAATACTG…
KCG_S0055	Endogenous	GCTAGCGCCACCATGGCTAGAGGTGCTGAAGGTGGAAGAGGCGACGCTGGATGGGGACTTAGAGGTGCACTTGCTGCTGTGGCTCTGCTGTCTGCTCTGAATGCCGCCGGAACAGTGTTTGCCCTTTGTCAGTGGCGAGGACTGTCTAGCGCTCTGAGAGCACTGGAAGCCCAGAGAGGCAGAGAACAGAGAGAGGATAGCGCCCTGAGAAGCTTCCTGGCCGAACTGTCTAGAGCCCCTAGAGGCGCTTCTGCACCTCCTCAGGATCCAGCCTCTAGCGCCAGAAACAAGAGAAGCCACTCTGGCGAGCCCGCTCCTCACATTAGAGCCGAGTCTCACGACATGCTGATGATGATGACCTACAGCATGGTGCCCATCAGAGTGATGGTGGACCTGTGC…	1673	TTTCAATATTATTGAAGCATTTATCAGGGTTATTGTCTCATGAGCGGATACATATTTGAATGTATTTAGAAAAATAAACAAATAGGGGTCAGTGTTACAACCAATTAACCAATTCTGAACATTATCGCGAGCCCATTTATACCTGAATATGGCTCATAACACCCCTTGCTCATGACCAAAATCCCTTAACGTGAGTTACGCGCGCGTCGTTCCACTGAGCGTCAGACCCCGTAGAAAAGATCAAAGGATCTTCTTGAGATCCTTTTTTTCTGCGCGTAATCTGCTGCTTGCAAACAAAAAAACCACCGCTACCAGCGGTGGTTTGTTTGCCGGATCAAGAGCTACCAACTCTTTTTCCGAAGGTAACTGGCTTCAGCAGAGCGCAGATACCAAATACTG…
KCG_S0057	Endogenous	GCTAGCGCCACCATGGCTGAATCTGGACTGGCTATGTGGCCTAGCCTGCTGTTGCTGCTGCTTCTTCCTGGACCTCCTCCTGTGGCTGGACTGGAAGATGCCGCTTTTCCTCACCTGGGCGAATCTCTGCAACCCCTGCCTAGAGCCTGTCCTCTGAGATGCAGCTGCCCTAGAGTGGACACCGTGGACTGTGATGGCCTGGACCTGAGAGTGTTCCCCGACAATATCACCAGAGCCGCTCAGCACCTGAGCCTGCAGAACAATCAGCTGCAAGAGCTGCCTTACAACGAGCTGAGCAGACTGAGCGGCCTGAGAACCCTGAATCTGCACAACAACCTGATCAGCAGCGAGGGCCTGCCTGATGAGGCCTTTGAATCTCTGACACAGCTGCAGCACCTG…	1556	TTTCAATATTATTGAAGCATTTATCAGGGTTATTGTCTCATGAGCGGATACATATTTGAATGTATTTAGAAAAATAAACAAATAGGGGTCAGTGTTACAACCAATTAACCAATTCTGAACATTATCGCGAGCCCATTTATACCTGAATATGGCTCATAACACCCCTTGCTCATGACCAAAATCCCTTAACGTGAGTTACGCGCGCGTCGTTCCACTGAGCGTCAGACCCCGTAGAAAAGATCAAAGGATCTTCTTGAGATCCTTTTTTTCTGCGCGTAATCTGCTGCTTGCAAACAAAAAAACCACCGCTACCAGCGGTGGTTTGTTTGCCGGATCAAGAGCTACCAACTCTTTTTCCGAAGGTAACTGGCTTCAGCAGAGCGCAGATACCAAATACTG…
KCG_S0058	Endogenous	GCTAGCGCCACCATGGCTCAGTCTAGAGTGCTGTTGCTGCTGCTCCTGCTGCCTCCTCAACTGCATCTGGGACCTGTGCTGGCTGTTAGAGCCCCTGGATTTGGAAGATCTGGCGGCCACTCTCTGAGCCCCGAGGAAAATGAGTTCGCCGAAGAGGAACCAGTGCTGGTGCTGTCTCCAGAGGAACCTGGACCTGGACCAGCTGCCGTGTCCTGTCCTAGAGATTGTGCCTGTTCTCAAGAGGGCGTCGTGGATTGTGGCGGCATCGATCTGAGAGAGTTCCCTGGCGATCTGCCCGAGCACACAAATCACCTGAGCCTGCAGAACAACCAGCTGGAAAAGATCTACCCTGAGGAACTGAGCCGGCTGCACAGACTGGAAACCCTGAATCTCCAGAAC…	1859	TTTCAATATTATTGAAGCATTTATCAGGGTTATTGTCTCATGAGCGGATACATATTTGAATGTATTTAGAAAAATAAACAAATAGGGGTCAGTGTTACAACCAATTAACCAATTCTGAACATTATCGCGAGCCCATTTATACCTGAATATGGCTCATAACACCCCTTGCTCATGACCAAAATCCCTTAACGTGAGTTACGCGCGCGTCGTTCCACTGAGCGTCAGACCCCGTAGAAAAGATCAAAGGATCTTCTTGAGATCCTTTTTTTCTGCGCGTAATCTGCTGCTTGCAAACAAAAAAACCACCGCTACCAGCGGTGGTTTGTTTGCCGGATCAAGAGCTACCAACTCTTTTTCCGAAGGTAACTGGCTTCAGCAGAGCGCAGATACCAAATACTG…
KCG_S0059	Endogenous	GCTAGCGCCACCATGGCTATGGTGTCTGCCATGAGCTGGGTGCTGTACCTGTGGATCTCTGCCTGTGCCATGCTGCTGTGTCACGGCAGCCTGCAGCACACCTTTCAGCAGCACCATCTGCACAGACCTGAAGGCGGCACCTGTGAAGTGATCGCCGCTCACAGATGCTGCAACAAGAACCGGATTGAGGAACGGTCCCAGACCGTGAAGTGTAGCTGTCTGCCTGGAAAGGTGGCCGGCACCACCAGAAATAGACCTAGCTGTGTGGACGCCAGCATCGTGATCGGAAAGTGGTGGTGCGAGATGGAACCTTGCCTGGAAGGCGAGGAATGCAAGACCCTGCCTGACAATTCTGGCTGGATGTGCGCCACCGGCAACAAGATCAAGACCACCAGGATT…	419	TTTCAATATTATTGAAGCATTTATCAGGGTTATTGTCTCATGAGCGGATACATATTTGAATGTATTTAGAAAAATAAACAAATAGGGGTCAGTGTTACAACCAATTAACCAATTCTGAACATTATCGCGAGCCCATTTATACCTGAATATGGCTCATAACACCCCTTGCTCATGACCAAAATCCCTTAACGTGAGTTACGCGCGCGTCGTTCCACTGAGCGTCAGACCCCGTAGAAAAGATCAAAGGATCTTCTTGAGATCCTTTTTTTCTGCGCGTAATCTGCTGCTTGCAAACAAAAAAACCACCGCTACCAGCGGTGGTTTGTTTGCCGGATCAAGAGCTACCAACTCTTTTTCCGAAGGTAACTGGCTTCAGCAGAGCGCAGATACCAAATACTG…
KCG_S0060	Endogenous	GCTAGCGCCACCATGAGCAAGAGATACCTGCAGAAGGCCACCAAGGGCAAGCTGCTGATCATCATCTTCATCGTGACCCTGTGGGGCAAAGTGGTGTCCAGCGCCAATCACCACAAGGCCCACCACGTGAAAACAGGCACATGTGAAGTGGTGGCCCTGCACAGATGCTGCAACAAGAACAAGATCGAGGAACGGTCCCAGACCGTGAAGTGCAGCTGTTTTCCTGGCCAAGTGGCCGGCACAACAAGAGCTGCTCCAAGCTGTGTGGACGCCAGCATCGTGGAACAGAAATGGTGGTGCCACATGCAGCCCTGCCTGGAAGGCGAGGAATGCAAGGTGCTGCCCGATAGAAAAGGCTGGTCCTGCAGCAGCGGCAACAAAGTGAAAACCACCAGAGTG…	413	TTTCAATATTATTGAAGCATTTATCAGGGTTATTGTCTCATGAGCGGATACATATTTGAATGTATTTAGAAAAATAAACAAATAGGGGTCAGTGTTACAACCAATTAACCAATTCTGAACATTATCGCGAGCCCATTTATACCTGAATATGGCTCATAACACCCCTTGCTCATGACCAAAATCCCTTAACGTGAGTTACGCGCGCGTCGTTCCACTGAGCGTCAGACCCCGTAGAAAAGATCAAAGGATCTTCTTGAGATCCTTTTTTTCTGCGCGTAATCTGCTGCTTGCAAACAAAAAAACCACCGCTACCAGCGGTGGTTTGTTTGCCGGATCAAGAGCTACCAACTCTTTTTCCGAAGGTAACTGGCTTCAGCAGAGCGCAGATACCAAATACTG…
KCG_S0061	Endogenous	GCTAGCGCCACCATGGCTCCATCTCCAAGAACAGGCAGCAGACAGGATGCCACCGCTCTGCCTAGCATGAGCAGCACCTTTTGGGCCTTCATGATCCTGGCCAGCCTGCTGATCGCCTACTGTTCTCAACTGGCCGCTGGCACATGCGAGATCGTGACCCTGGATAGAGACAGCAGCCAGCCTCGGAGAACAATCGCCAGACAGACTGCCAGATGCGCCTGCAGAAAAGGCCAGATCGCCGGCACAACAAGAGCTAGACCTGCCTGTGTGGACGCCCGGATCATCAAGACAAAGCAGTGGTGCGACATGCTGCCCTGTCTGGAAGGCGAAGGCTGCGATCTGCTGATCAACAGAAGCGGCTGGACCTGTACACAGCCTGGCGGCAGAATCAAGACCACC…	416	TTTCAATATTATTGAAGCATTTATCAGGGTTATTGTCTCATGAGCGGATACATATTTGAATGTATTTAGAAAAATAAACAAATAGGGGTCAGTGTTACAACCAATTAACCAATTCTGAACATTATCGCGAGCCCATTTATACCTGAATATGGCTCATAACACCCCTTGCTCATGACCAAAATCCCTTAACGTGAGTTACGCGCGCGTCGTTCCACTGAGCGTCAGACCCCGTAGAAAAGATCAAAGGATCTTCTTGAGATCCTTTTTTTCTGCGCGTAATCTGCTGCTTGCAAACAAAAAAACCACCGCTACCAGCGGTGGTTTGTTTGCCGGATCAAGAGCTACCAACTCTTTTTCCGAAGGTAACTGGCTTCAGCAGAGCGCAGATACCAAATACTG…
KCG_S0062	Endogenous	GCTAGCGCCACCATGGTTCTGCTGCATTGGTGTCTGCTGTGGCTGCTGTTCCCTCTGAGCAGCAGGACACAGAAACTGCCCACCAGAGATGAGGAACTGTTCCAGATGCAGATCCGCGACAAGGCATTCTTCCACGACAGCAGCGTTATCCCCGATGGCGCCGAGATCAGCAGCTACCTGTTCCGGGATACCCCTAAGCGGTACTTCTTCGTGGTGGAAGAGGACAACACCCCACTGAGCGTGACCGTGACACCTTGTGATGCCCCTCTGGAATGGAAGCTGAGCCTGCAAGAGCTGCCTGAGGATAGATCTGGCGAAGGCTCTGGCGACCTGGAACCTCTGGAACAACAGAAGCAGCAGATCATCAACGAGGAAGGCACCGAGCTGTTCAGCTACAAG…	1724	TTTCAATATTATTGAAGCATTTATCAGGGTTATTGTCTCATGAGCGGATACATATTTGAATGTATTTAGAAAAATAAACAAATAGGGGTCAGTGTTACAACCAATTAACCAATTCTGAACATTATCGCGAGCCCATTTATACCTGAATATGGCTCATAACACCCCTTGCTCATGACCAAAATCCCTTAACGTGAGTTACGCGCGCGTCGTTCCACTGAGCGTCAGACCCCGTAGAAAAGATCAAAGGATCTTCTTGAGATCCTTTTTTTCTGCGCGTAATCTGCTGCTTGCAAACAAAAAAACCACCGCTACCAGCGGTGGTTTGTTTGCCGGATCAAGAGCTACCAACTCTTTTTCCGAAGGTAACTGGCTTCAGCAGAGCGCAGATACCAAATACTG…
KCG_S0063	Endogenous	GCTAGCGCCACCATGAGAACACTGTGGATGGCCCTGTGTGCCCTGTCTAGACTTTGGCCTGGTGCTCAGGCTGGATGTGCCGAAGCTGGAAGATGCTGTCCTGGCAGAGATCCTGCCTGTTTTGCTAGAGGCTGGCGGCTGGATAGAGTGTACGGAACCTGCTTCTGCGACCAGGCCTGTAGATTCACCGGCGACTGCTGCTTCGACTACGACAGAGCTTGTCCCGCCAGACCTTGTTTTGTTGGCGAATGGTCCCCTTGGAGCGGCTGTGCCGATCAGTGCAAGCCTACCACAAGAGTGCGGCGGAGATCTGTGCAGCAAGAGCCTCAAAATGGCGGCGCTCCTTGTCCTCCACTGGAAGAAAGAGCCGGCTGCCTGGAATACTCTACCCCTCAAGGA…	812	TTTCAATATTATTGAAGCATTTATCAGGGTTATTGTCTCATGAGCGGATACATATTTGAATGTATTTAGAAAAATAAACAAATAGGGGTCAGTGTTACAACCAATTAACCAATTCTGAACATTATCGCGAGCCCATTTATACCTGAATATGGCTCATAACACCCCTTGCTCATGACCAAAATCCCTTAACGTGAGTTACGCGCGCGTCGTTCCACTGAGCGTCAGACCCCGTAGAAAAGATCAAAGGATCTTCTTGAGATCCTTTTTTTCTGCGCGTAATCTGCTGCTTGCAAACAAAAAAACCACCGCTACCAGCGGTGGTTTGTTTGCCGGATCAAGAGCTACCAACTCTTTTTCCGAAGGTAACTGGCTTCAGCAGAGCGCAGATACCAAATACTG…
KCG_S0064	Endogenous	GCTAGCGCCACCATGAGAGCCTGGATCTTTTTCCTGCTGTGTCTGGCTGGCAGAGCCCTGGCTGCTCCTCAACAAGAAGCTCTGCCTGACGAGACAGAGGTGGTGGAAGAAACCGTGGCCGAAGTGACCGAAGTGTCTGTGGGAGCCAATCCTGTGCAGGTCGAAGTGGGCGAATTCGACGATGGCGCCGAAGAGACTGAAGAGGAAGTGGTGGCCGAGAATCCCTGCCAGAATCACCACTGCAAGCACGGCAAAGTGTGCGAGCTGGACGAGAACAACACCCCTATGTGCGTGTGTCAGGACCCCACAAGCTGTCCTGCTCCTATCGGCGAGTTCGAGAAAGTGTGCAGCAACGACAACAAGACCTTCGACAGCAGCTGCCACTTCTTCGCCACCAAG…	929	TTTCAATATTATTGAAGCATTTATCAGGGTTATTGTCTCATGAGCGGATACATATTTGAATGTATTTAGAAAAATAAACAAATAGGGGTCAGTGTTACAACCAATTAACCAATTCTGAACATTATCGCGAGCCCATTTATACCTGAATATGGCTCATAACACCCCTTGCTCATGACCAAAATCCCTTAACGTGAGTTACGCGCGCGTCGTTCCACTGAGCGTCAGACCCCGTAGAAAAGATCAAAGGATCTTCTTGAGATCCTTTTTTTCTGCGCGTAATCTGCTGCTTGCAAACAAAAAAACCACCGCTACCAGCGGTGGTTTGTTTGCCGGATCAAGAGCTACCAACTCTTTTTCCGAAGGTAACTGGCTTCAGCAGAGCGCAGATACCAAATACTG…
KCG_S0065	Endogenous	GCTAGCGCCACCATGAAGACCGGCCTGTTCTTTCTGTGTCTGCTGGGCACAGCCGCCGCTATTCCTACAAATGCCAGACTGCTGAGCGACCACAGCAAGCCTACAGCCGAAACAGTGGCCCCTGACAACACAGCTATCCCTAGCCTGAGAGCCGAGGCCGAGGAAAACGAGAAAGAAACCGCCGTGTCCACCGAGGACGATTCTCACCACAAGGCCGAGAAGTCCAGCGTGCTGAAGTCCAAAGAGGAAAGCCACGAGCAGTCTGCCGAGCAGGGCAAGTCTAGCTCTCAAGAGCTGGGCCTGAAGGACCAAGAGGATTCTGATGGCCACCTGAGCGTGAACCTGGAATATGCCCCTACCGAGGGCACCCTGGACATCAAAGAAGATATGAGCGAGCCC…	2012	TTTCAATATTATTGAAGCATTTATCAGGGTTATTGTCTCATGAGCGGATACATATTTGAATGTATTTAGAAAAATAAACAAATAGGGGTCAGTGTTACAACCAATTAACCAATTCTGAACATTATCGCGAGCCCATTTATACCTGAATATGGCTCATAACACCCCTTGCTCATGACCAAAATCCCTTAACGTGAGTTACGCGCGCGTCGTTCCACTGAGCGTCAGACCCCGTAGAAAAGATCAAAGGATCTTCTTGAGATCCTTTTTTTCTGCGCGTAATCTGCTGCTTGCAAACAAAAAAACCACCGCTACCAGCGGTGGTTTGTTTGCCGGATCAAGAGCTACCAACTCTTTTTCCGAAGGTAACTGGCTTCAGCAGAGCGCAGATACCAAATACTG…
KCG_S0066	Endogenous	GCTAGCGCCACCATGTTGCCTGCCAGATGTGCTAGACTGCTGACCCCTCATCTGCTGCTGGTGCTGGTTCAGCTGTCTCCTGCCAGAGGCCACAGAACAACAGGCCCCAGATTCCTGATCAGCGACAGAGATCCCCAGTGCAACCTGCACTGTAGCAGAACCCAGCCTAAGCCTATCTGTGCCAGCGACGGCAGATCCTACGAGAGCATGTGTGAATACCAGCGGGCCAAGTGCAGAGATCCTACACTGGGAGTTGTGCACCGGGGCAGATGTAAAGATGCCGGCCAGAGCAAGTGCCGGCTGGAAAGAGCACAAGCCCTGGAACAGGCCAAGAAACCCCAAGAGGCCGTGTTTGTGCCTGAGTGTGGCGAGGATGGCAGCTTCACACAGGTGCAGTGT…	1322	TTTCAATATTATTGAAGCATTTATCAGGGTTATTGTCTCATGAGCGGATACATATTTGAATGTATTTAGAAAAATAAACAAATAGGGGTCAGTGTTACAACCAATTAACCAATTCTGAACATTATCGCGAGCCCATTTATACCTGAATATGGCTCATAACACCCCTTGCTCATGACCAAAATCCCTTAACGTGAGTTACGCGCGCGTCGTTCCACTGAGCGTCAGACCCCGTAGAAAAGATCAAAGGATCTTCTTGAGATCCTTTTTTTCTGCGCGTAATCTGCTGCTTGCAAACAAAAAAACCACCGCTACCAGCGGTGGTTTGTTTGCCGGATCAAGAGCTACCAACTCTTTTTCCGAAGGTAACTGGCTTCAGCAGAGCGCAGATACCAAATACTG…
KCG_S0067	Endogenous	GCTAGCGCCACCATGCTGCTGCCTCAACTGTGTTGGCTGCCTCTGCTGGCTGGACTTTTGCCTCCTGTGCCTGCTCAGAAGTTCAGCGCCCTGACCTTCCTGAGAGTGGACCAGGACAAGGATAAGGACTGCAGCCTGGATTGCGCCGGCTCTCCTCAAAAACCTCTGTGTGCCAGCGACGGCAGAACCTTCCTGTCCAGATGTGAATTCCAGCGGGCCAAGTGCAAGGACCCTCAGCTGGAAATCGCCTACAGAGGCAACTGCAAGGATGTGTCTAGATGCGTGGCCGAGCGGAAGTACACACAAGAGCAGGCCCGGAAAGAGTTCCAGCAGGTTTTCATCCCCGAGTGCAACGACGATGGCACCTACTCTCAGGTGCAGTGTCACAGCTACACCGGC…	1358	TTTCAATATTATTGAAGCATTTATCAGGGTTATTGTCTCATGAGCGGATACATATTTGAATGTATTTAGAAAAATAAACAAATAGGGGTCAGTGTTACAACCAATTAACCAATTCTGAACATTATCGCGAGCCCATTTATACCTGAATATGGCTCATAACACCCCTTGCTCATGACCAAAATCCCTTAACGTGAGTTACGCGCGCGTCGTTCCACTGAGCGTCAGACCCCGTAGAAAAGATCAAAGGATCTTCTTGAGATCCTTTTTTTCTGCGCGTAATCTGCTGCTTGCAAACAAAAAAACCACCGCTACCAGCGGTGGTTTGTTTGCCGGATCAAGAGCTACCAACTCTTTTTCCGAAGGTAACTGGCTTCAGCAGAGCGCAGATACCAAATACTG…
KCG_S0068	Endogenous	GCTAGCGCCACCATGCTGCAAAATTCTGCCGTGCTGCTGGTGCTGGTCATCTCTGCCTCTGCCACACACGAGGCCGAGCAGAATGATAGCGTGTCCCCTAGAAAGTCCAGAGTGGCCGCTCAGAATAGCGCCGAAGTCGTGCGTTGTCTGAACTCTGCCCTGCAAGTTGGATGCGGCGCCTTCGCCTGTCTGGAAAACAGCACCTGTGACACCGACGGGATGTACGATATCTGCAAGAGCTTCCTGTACAGCGCCGCCAAGTTCGATACCCAGGGCAAAGCCTTCGTGAAAGAAAGCCTGAAGTGTATCGCCAACGGCGTGACCTCTAAGGTGTTCCTGGCCATCAGACGGTGCAGCACCTTCCAGAGAATGATCGCCGAGGTGCAAGAGGAATGCTAC…	761	TTTCAATATTATTGAAGCATTTATCAGGGTTATTGTCTCATGAGCGGATACATATTTGAATGTATTTAGAAAAATAAACAAATAGGGGTCAGTGTTACAACCAATTAACCAATTCTGAACATTATCGCGAGCCCATTTATACCTGAATATGGCTCATAACACCCCTTGCTCATGACCAAAATCCCTTAACGTGAGTTACGCGCGCGTCGTTCCACTGAGCGTCAGACCCCGTAGAAAAGATCAAAGGATCTTCTTGAGATCCTTTTTTTCTGCGCGTAATCTGCTGCTTGCAAACAAAAAAACCACCGCTACCAGCGGTGGTTTGTTTGCCGGATCAAGAGCTACCAACTCTTTTTCCGAAGGTAACTGGCTTCAGCAGAGCGCAGATACCAAATACTG…
KCG_S0069	Endogenous	GCTAGCGCCACCATGTGTGCTGAGAGACTGGGCCAGTTTATGACACTGGCCCTGGTGCTGGCCACCTTTGATCCTGCTAGAGGCACCGATGCCACCAATCCTCCAGAGGGACCTCAGGATAGAAGCAGCCAGCAGAAGGGCAGACTGAGCCTGCAGAATACCGCCGAGATCCAGCACTGTCTGGTCAATGCTGGCGACGTTGGCTGTGGCGTGTTCGAGTGCTTCGAGAACAACAGCTGCGAGATCAGAGGCCTGCACGGCATCTGCATGACCTTTCTGCACAACGCCGGCAAGTTCGATGCCCAGGGCAAGAGCTTTATCAAGGACGCCCTGAAGTGCAAGGCCCACGCTCTGAGACACAGATTCGGCTGCATCAGCAGAAAGTGCCCCGCCATCAGA…	926	TTTCAATATTATTGAAGCATTTATCAGGGTTATTGTCTCATGAGCGGATACATATTTGAATGTATTTAGAAAAATAAACAAATAGGGGTCAGTGTTACAACCAATTAACCAATTCTGAACATTATCGCGAGCCCATTTATACCTGAATATGGCTCATAACACCCCTTGCTCATGACCAAAATCCCTTAACGTGAGTTACGCGCGCGTCGTTCCACTGAGCGTCAGACCCCGTAGAAAAGATCAAAGGATCTTCTTGAGATCCTTTTTTTCTGCGCGTAATCTGCTGCTTGCAAACAAAAAAACCACCGCTACCAGCGGTGGTTTGTTTGCCGGATCAAGAGCTACCAACTCTTTTTCCGAAGGTAACTGGCTTCAGCAGAGCGCAGATACCAAATACTG…
KCG_S0070	Endogenous	GCTAGCGCCACCATGCCTGCTATTGCTGTTCTTGCTGCTGCCGCCGCTGCCTGGTGTTTTCTGCAAGTGGAAAGCAGACACCTGGATGCCCTTGCTGGCGGAGCTGGCCCTAATCACGGCAACTTTCTGGACAACGACCAGTGGCTGAGCACCGTGTCTCAGTACGACCGGGACAAGTACTGGAACAGATTCCGGGACGACGACTACTTCCGGAACTGGAACCCCAACAAGCCCTTCGATCAGGCCCTGGATCCTAGCAAGGACCCCTGCCTGAAAGTGAAGTGCAGCCCTCACAAAGTGTGCGTGACCCAGGATTACCAGACAGCCCTGTGCGTGTCCCGGAAACATCTGCTGCCTCGGCAGAAAAAGGGCAACGTGGCCCAGAAACACTGGGTCGGA…	1337	TTTCAATATTATTGAAGCATTTATCAGGGTTATTGTCTCATGAGCGGATACATATTTGAATGTATTTAGAAAAATAAACAAATAGGGGTCAGTGTTACAACCAATTAACCAATTCTGAACATTATCGCGAGCCCATTTATACCTGAATATGGCTCATAACACCCCTTGCTCATGACCAAAATCCCTTAACGTGAGTTACGCGCGCGTCGTTCCACTGAGCGTCAGACCCCGTAGAAAAGATCAAAGGATCTTCTTGAGATCCTTTTTTTCTGCGCGTAATCTGCTGCTTGCAAACAAAAAAACCACCGCTACCAGCGGTGGTTTGTTTGCCGGATCAAGAGCTACCAACTCTTTTTCCGAAGGTAACTGGCTTCAGCAGAGCGCAGATACCAAATACTG…
KCG_S0071	Endogenous	GCTAGCGCCACCATGAGAGCACCTGGATGTGGTAGACTGGTGCTGCCTCTGCTGCTTCTGGCTGCTGCTGCTCTTGCTGAAGGCGACGCCAAAGGACTGAAAGAGGGCGAGACACCCGGCAACTTCATGGAAGATGAGCAGTGGCTGAGCAGCATCTCCCAGTACAGCGGCAAGATCAAGCACTGGAACAGATTCCGCGACGAGGTCGAGGACGACTACATCAAGAGCTGGGAAGATAACCAGCAGGGCGACGAGGCCCTGGATACCACCAAAGATCCCTGCCAGAAAGTGAAGTGCAGCCGGCACAAAGTGTGCATTGCCCAGGGATACCAGCGGGCCATGTGCATCAGCAGAAAGAAGCTGGAACACCGGATCAAGCAGCCCACAGTGAAGCTGCAC…	1292	TTTCAATATTATTGAAGCATTTATCAGGGTTATTGTCTCATGAGCGGATACATATTTGAATGTATTTAGAAAAATAAACAAATAGGGGTCAGTGTTACAACCAATTAACCAATTCTGAACATTATCGCGAGCCCATTTATACCTGAATATGGCTCATAACACCCCTTGCTCATGACCAAAATCCCTTAACGTGAGTTACGCGCGCGTCGTTCCACTGAGCGTCAGACCCCGTAGAAAAGATCAAAGGATCTTCTTGAGATCCTTTTTTTCTGCGCGTAATCTGCTGCTTGCAAACAAAAAAACCACCGCTACCAGCGGTGGTTTGTTTGCCGGATCAAGAGCTACCAACTCTTTTTCCGAAGGTAACTGGCTTCAGCAGAGCGCAGATACCAAATACTG…
KCG_S0072	Endogenous	GCTAGCGCCACCATGCTGAAAGTGTCTGCCGTGCTGTGTGTGTGCGCCGCTGCTTGGTGTTCTCAATCTCTTGCTGCTGCTGCCGCTGTTGCTGCAGCTGGTGGAAGATCCGATGGCGGCAACTTCCTGGACGATAAGCAGTGGCTGACCACCATCAGCCAGTACGACAAAGAAGTCGGCCAGTGGAACAAGTTCCGCGACGAAGTGGAAGATGACTACTTCAGAACTTGGAGCCCCGGCAAGCCCTTCGATCAAGCCCTGGATCCTGCCAAGGATCCCTGCCTGAAGATGAAGTGCAGCCGGCACAAAGTGTGCATTGCCCAGGATAGCCAGACCGCCGTGTGTATCAGCCATCGGAGACTGACCCACAGAATGAAGGAAGCCGGCGTCGACCATAGA…	1328	TTTCAATATTATTGAAGCATTTATCAGGGTTATTGTCTCATGAGCGGATACATATTTGAATGTATTTAGAAAAATAAACAAATAGGGGTCAGTGTTACAACCAATTAACCAATTCTGAACATTATCGCGAGCCCATTTATACCTGAATATGGCTCATAACACCCCTTGCTCATGACCAAAATCCCTTAACGTGAGTTACGCGCGCGTCGTTCCACTGAGCGTCAGACCCCGTAGAAAAGATCAAAGGATCTTCTTGAGATCCTTTTTTTCTGCGCGTAATCTGCTGCTTGCAAACAAAAAAACCACCGCTACCAGCGGTGGTTTGTTTGCCGGATCAAGAGCTACCAACTCTTTTTCCGAAGGTAACTGGCTTCAGCAGAGCGCAGATACCAAATACTG…
KCG_S0073	Endogenous	GCTAGCGCCACCATGTCTGCTCTGCTGAGCCTGTGTTTTGTGCTGCCTCTGGCTGCCCCTGGACACGGAACACAAGGATGGGAGCCTTGTACCGACCTGAGGCCTCTGGATATTCTGGCCGAGGTTGTGCCTTCTGATGGCGCCACATCTGGCATCAGAATCGTGCAGGTTCACGGCGCTAGAGGCCTGCAACTTTCTGTGGCCGCTCCTAGAACCATGAGCTTCCCCGCCAGCAGAATCTTCAGCCAGTGCGATCTGTTCCCCGAGGAATTCAGCATCGTGGTCACCCTGAGAGTGCCCAACCTGCCTCCTAAGAGAAACGAGTACCTGCTGACCGTGGTGGCCGAGGAATCTGATCTGCTGCTGCTGGGACTGAGACTGTCTCCTGCTCAGCTGCAC…	2027	TTTCAATATTATTGAAGCATTTATCAGGGTTATTGTCTCATGAGCGGATACATATTTGAATGTATTTAGAAAAATAAACAAATAGGGGTCAGTGTTACAACCAATTAACCAATTCTGAACATTATCGCGAGCCCATTTATACCTGAATATGGCTCATAACACCCCTTGCTCATGACCAAAATCCCTTAACGTGAGTTACGCGCGCGTCGTTCCACTGAGCGTCAGACCCCGTAGAAAAGATCAAAGGATCTTCTTGAGATCCTTTTTTTCTGCGCGTAATCTGCTGCTTGCAAACAAAAAAACCACCGCTACCAGCGGTGGTTTGTTTGCCGGATCAAGAGCTACCAACTCTTTTTCCGAAGGTAACTGGCTTCAGCAGAGCGCAGATACCAAATACTG…
KCG_S0074	Endogenous	GCTAGCGCCACCATGAGCGAGAGAGTGGAAAGAAATTGGAGCACCGGCGGATGGCTGCTGGCTCTGTGTCTTGCTTGGCTGTGGACACATCTGACACTGGCTGCTCTGCAGCCTCCTACAGCTACAGTTCTGGTGCAGCAGGGCACCTGTGAAGTGATCGCCGCTCACAGATGCTGCAACCGGAACAGAATTGAGGAACGGTCCCAGACCGTGAAGTGCAGCTGTTTTTCTGGCCAAGTGGCCGGCACCACAAGAGCCAAGCCATCTTGTGTGGATGCCAGCATCGTGCTGCAGAGATGGTGGTGCCAGATGGAACCTTGTCTGCCCGGCGAGGAATGCAAGGTGTTGCCTGATCTGAGCGGCTGGTCTTGCAGCAGCGGCCACAAAGTGAAAACCACC…	419	TTTCAATATTATTGAAGCATTTATCAGGGTTATTGTCTCATGAGCGGATACATATTTGAATGTATTTAGAAAAATAAACAAATAGGGGTCAGTGTTACAACCAATTAACCAATTCTGAACATTATCGCGAGCCCATTTATACCTGAATATGGCTCATAACACCCCTTGCTCATGACCAAAATCCCTTAACGTGAGTTACGCGCGCGTCGTTCCACTGAGCGTCAGACCCCGTAGAAAAGATCAAAGGATCTTCTTGAGATCCTTTTTTTCTGCGCGTAATCTGCTGCTTGCAAACAAAAAAACCACCGCTACCAGCGGTGGTTTGTTTGCCGGATCAAGAGCTACCAACTCTTTTTCCGAAGGTAACTGGCTTCAGCAGAGCGCAGATACCAAATACTG…
KCG_S0075	Endogenous	GCTAGCGCCACCATGAGAAGCCCCAGAATGAGAGTGTGTGCCAAGAGCGTGCTGCTGAGCCATTGGCTGTTTCTGGCCTACGTGCTGATGGTCTGCTGCAAGCTGATGAGCGCCAGCTCTCAGCACCTGAGAGGACATGCCGGACACCACCAGATCAAGCAGGGCACATGTGAAGTGGTGGCCGTGCACAGATGCTGCAACAAGAACAGAATCGAGGAACGGTCCCAGACCGTGAAGTGCAGCTGTTTTCCTGGCCAAGTGGCCGGCACAACAAGAGCCCAGCCTTCTTGTGTGGAAGCCAGCATCGTGATCCAGAAATGGTGGTGCCACATGAACCCCTGCCTGGAAGGCGAGGATTGCAAGGTGCTGCCTGATTACAGCGGCTGGTCTTGCAGCTCC…	440	TTTCAATATTATTGAAGCATTTATCAGGGTTATTGTCTCATGAGCGGATACATATTTGAATGTATTTAGAAAAATAAACAAATAGGGGTCAGTGTTACAACCAATTAACCAATTCTGAACATTATCGCGAGCCCATTTATACCTGAATATGGCTCATAACACCCCTTGCTCATGACCAAAATCCCTTAACGTGAGTTACGCGCGCGTCGTTCCACTGAGCGTCAGACCCCGTAGAAAAGATCAAAGGATCTTCTTGAGATCCTTTTTTTCTGCGCGTAATCTGCTGCTTGCAAACAAAAAAACCACCGCTACCAGCGGTGGTTTGTTTGCCGGATCAAGAGCTACCAACTCTTTTTCCGAAGGTAACTGGCTTCAGCAGAGCGCAGATACCAAATACTG…
KCG_S0076	Endogenous	GCTAGCGCCACCATGAAGCTGATGGTGCTGGTGTTCACCATCGGCCTGACACTGCTGCTGGGAGTTCAGGCCATGCCTGCCAATAGACTGAGCTGCTACCGGAAGATCCTGAAGGACCACAACTGCCACAACCTGCCTGAAGGCGTGGCCGATCTGACCCAGATCGATGTGAACGTGCAGGACCACTTCTGGGATGGCAAGGGCTGCGAGATGATCTGCTACTGCAACTTCAGCGAGCTGCTGTGCTGCCCCAAGGATGTGTTCTTCGGCCCCAAGATCAGCTTCGTGATCCCCTGCAACAATCAAGGCGCGCC	314	TTTCAATATTATTGAAGCATTTATCAGGGTTATTGTCTCATGAGCGGATACATATTTGAATGTATTTAGAAAAATAAACAAATAGGGGTCAGTGTTACAACCAATTAACCAATTCTGAACATTATCGCGAGCCCATTTATACCTGAATATGGCTCATAACACCCCTTGCTCATGACCAAAATCCCTTAACGTGAGTTACGCGCGCGTCGTTCCACTGAGCGTCAGACCCCGTAGAAAAGATCAAAGGATCTTCTTGAGATCCTTTTTTTCTGCGCGTAATCTGCTGCTTGCAAACAAAAAAACCACCGCTACCAGCGGTGGTTTGTTTGCCGGATCAAGAGCTACCAACTCTTTTTCCGAAGGTAACTGGCTTCAGCAGAGCGCAGATACCAAATACTG…
KCG_S0077	Endogenous	GCTAGCGCCACCATGGAATACCAGATCCTGAAGATGAGCCTGTGCCTGTTCATCCTGCTGTTTCTGACCCCTGGAATCCTGTGCATCTGCCCTCTGCAGTGCATCTGTACCGAGAGACACAGACACGTGGACTGCAGCGGCAGAAATCTGTCTACACTGCCTAGCGGCCTGCAAGAGAACATCATCCACCTGAACCTGAGCTACAACCACTTCACCGACCTGCACAACCAGCTGACCCAGTACACCAACCTGAGAACCCTGGACATCAGCAACAACCGGCTGGAAAGCCTGCCTGCTCATCTGCCTAGAAGCCTGTGGAATATGAGCGCCGCCAACAACAACATCAAGCTGCTGGACAAGAGCGACACCGCCTACCAGTGGAACCTGAAGTACCTGGAC…	1271	TTTCAATATTATTGAAGCATTTATCAGGGTTATTGTCTCATGAGCGGATACATATTTGAATGTATTTAGAAAAATAAACAAATAGGGGTCAGTGTTACAACCAATTAACCAATTCTGAACATTATCGCGAGCCCATTTATACCTGAATATGGCTCATAACACCCCTTGCTCATGACCAAAATCCCTTAACGTGAGTTACGCGCGCGTCGTTCCACTGAGCGTCAGACCCCGTAGAAAAGATCAAAGGATCTTCTTGAGATCCTTTTTTTCTGCGCGTAATCTGCTGCTTGCAAACAAAAAAACCACCGCTACCAGCGGTGGTTTGTTTGCCGGATCAAGAGCTACCAACTCTTTTTCCGAAGGTAACTGGCTTCAGCAGAGCGCAGATACCAAATACTG…
KCG_S0078	Endogenous	GCTAGCGCCACCATGCTGGATTGGAGACTGGCCAGCGCTCACTTCATTCTGGCCGTGACACTGACACTGTGGTCCAGCGGAAAGGTGCTGTCTGTGGATGTGACCACCACCGAGGCCTTTGACTCTGGCGTGATCGATGTGCAGAGCACCCCTACCGTGCGGGAAGAGAAAAGCGCCACAGATCTGACAGCCAAACTGCTGCTGCTGGACGAGCTGGTGTCCCTGGAAAACGACGTGATCGAGACAAAGAAGAAGCGGAGCTTCAGCGGCTTCGGCAGCCCTCTGGATAGACTGTCTGCCGGCTCTGTGGATCACAAGGGCAAGCAGAGAAAGGTGGTGGATCACCCCAAGCGGAGATTCGGCATCCCTATGGACCGGATCGGCCGGAACAGACTGAGC…	419	TTTCAATATTATTGAAGCATTTATCAGGGTTATTGTCTCATGAGCGGATACATATTTGAATGTATTTAGAAAAATAAACAAATAGGGGTCAGTGTTACAACCAATTAACCAATTCTGAACATTATCGCGAGCCCATTTATACCTGAATATGGCTCATAACACCCCTTGCTCATGACCAAAATCCCTTAACGTGAGTTACGCGCGCGTCGTTCCACTGAGCGTCAGACCCCGTAGAAAAGATCAAAGGATCTTCTTGAGATCCTTTTTTTCTGCGCGTAATCTGCTGCTTGCAAACAAAAAAACCACCGCTACCAGCGGTGGTTTGTTTGCCGGATCAAGAGCTACCAACTCTTTTTCCGAAGGTAACTGGCTTCAGCAGAGCGCAGATACCAAATACTG…
KCG_S0079	Endogenous	GCTAGCGCCACCATGAGCCAAGAGCCTACCACCTACAGCCTGTTTCTGTTCCTGTTTCTCAGCCACGGCGTGTCCAGCTACACCGTGCCTAATAGCAGACAGGATCTGCACCCTCTGCTGCAGAACATGGCCGAGGAAATCATCGACGGCAGCTACCTGAATGCCCTGCTGGACCTGATCCAGTTCCAGAGCAGCCACGTGTGGACCGACGATCTGTCTCACAGAGTGCTGGCCTACCTGAACAGCCGGAACGTGGCCTTTACAATCCCATCTCTGCAGGCCGCCGTGGAAAACCACCTGGAACAGAGACTGCACCAGCCTCAGAAGCTGCTGGAAGATCTGAGAAAGACAGACGCCCAGCAGTTCCGGACCGCCATGAAGTGTCTGCTCGAGGACAAG…	3410	TTTCAATATTATTGAAGCATTTATCAGGGTTATTGTCTCATGAGCGGATACATATTTGAATGTATTTAGAAAAATAAACAAATAGGGGTCAGTGTTACAACCAATTAACCAATTCTGAACATTATCGCGAGCCCATTTATACCTGAATATGGCTCATAACACCCCTTGCTCATGACCAAAATCCCTTAACGTGAGTTACGCGCGCGTCGTTCCACTGAGCGTCAGACCCCGTAGAAAAGATCAAAGGATCTTCTTGAGATCCTTTTTTTCTGCGCGTAATCTGCTGCTTGCAAACAAAAAAACCACCGCTACCAGCGGTGGTTTGTTTGCCGGATCAAGAGCTACCAACTCTTTTTCCGAAGGTAACTGGCTTCAGCAGAGCGCAGATACCAAATACTG…
KCG_S0080	HA	GCTAGCGCCACCATGAAGACCATCATTGCCCTGAGCTACATCTTCTGCCTGGTGTTCGCTGCGGCCGCCGTGGCCAAGAAGAAGGACAAAGTCAAGAAAGGCGGCCCTGGCAGCGAGTGTGCTGAATGGGCTTGGGGACCTTGCACACCCAGCAGCAAGGATTGTGGCGTGGGCTTCAGAGAAGGCACCTGTGGTGCTCAGACCCAGCGGATCAGATGCAGAGTGCCCTGCAACTGGAAGAAAGAGTTTGGCGCCGACTGCAAGTACAAGTTCGAGAACTGGGGCGCCTGTGATGGCGGCACAGGCACAAAAGTTCGGCAGGGCACACTGAAGAAGGCCCGGTATAACGCCCAGTGCCAAGAGACAATCAGAGTGACCAAGCCTTGCACTCCCAAGACC…	447	TTTCAATATTATTGAAGCATTTATCAGGGTTATTGTCTCATGAGCGGATACATATTTGAATGTATTTAGAAAAATAAACAAATAGGGGTCAGTGTTACAACCAATTAACCAATTCTGAACATTATCGCGAGCCCATTTATACCTGAATATGGCTCATAACACCCCTTGCTCATGACCAAAATCCCTTAACGTGAGTTACGCGCGCGTCGTTCCACTGAGCGTCAGACCCCGTAGAAAAGATCAAAGGATCTTCTTGAGATCCTTTTTTTCTGCGCGTAATCTGCTGCTTGCAAACAAAAAAACCACCGCTACCAGCGGTGGTTTGTTTGCCGGATCAAGAGCTACCAACTCTTTTTCCGAAGGTAACTGGCTTCAGCAGAGCGCAGATACCAAATACTG…
KCG_S0081	HA	GCTAGCGCCACCATGAAGACCATCATTGCCCTGAGCTACATCTTCTGCCTGGTGTTCGCTGCGGCCGCCGGCAAGAAAGAGAAGCCCGAGAAGAAAGTGAAGAAGTCCGACTGCGGCGAGTGGCAGTGGAGTGTGTGTGTTCCTACCAGCGGCGATTGTGGCCTGGGCACAAGAGAGGGAACAAGAACAGGCGCCGAGTGCAAGCAGACCATGAAGACCCAGAGATGCAAGATCCCCTGCAACTGGAAGAAGCAGTTCGGAGCCGAATGCAAGTACCAGTTTCAGGCCTGGGGCGAGTGCGACCTGAACACAGCCCTGAAAACCAGAACCGGCAGCCTGAAGAGAGCCCTGCATAACGCCGAGTGTCAGAAAACCGTGACCATCAGCAAGCCCTGCGGC…	486	TTTCAATATTATTGAAGCATTTATCAGGGTTATTGTCTCATGAGCGGATACATATTTGAATGTATTTAGAAAAATAAACAAATAGGGGTCAGTGTTACAACCAATTAACCAATTCTGAACATTATCGCGAGCCCATTTATACCTGAATATGGCTCATAACACCCCTTGCTCATGACCAAAATCCCTTAACGTGAGTTACGCGCGCGTCGTTCCACTGAGCGTCAGACCCCGTAGAAAAGATCAAAGGATCTTCTTGAGATCCTTTTTTTCTGCGCGTAATCTGCTGCTTGCAAACAAAAAAACCACCGCTACCAGCGGTGGTTTGTTTGCCGGATCAAGAGCTACCAACTCTTTTTCCGAAGGTAACTGGCTTCAGCAGAGCGCAGATACCAAATACTG…
