# Supplementary material for: Identification of orphan ligand-receptor relationships using a cell-based CRISPRa enrichment screening platform
Source: eLife. 2022 Sep 30;11:e81398. doi: 10.7554/eLife.81398 (PMC9578707; doi:10.7554/eLife.81398)
Supplement: Figure 2—source data 3. — GDA data for all 20 high-priority candidates used in the CRISPR activation (CRISPRa) enrichment screening workflow. Data was obtained from the DisGenet database and visualized with Cytoscape (v3.9.1). [file elife-81398-fig2-data3.xlsx]

## Sheet: Data_S2
Gene	#GeneID	Disease	#DiseaseID	Type	Disease_Class	Semantic_Type	N_genes_d	N_SNPs_d	Score_GDA	EI_GDA	N_PMIDs	N_SNPs_GDA	First_Ref	Last_Ref
VWC2L	402117	Intelligence	C0021704	phenotype	Behavior and Behavior Mechanisms	Mental Process	645	2093	0.1	1	1	1	2019	2019
VWC2L	402117	Schizophrenia	C0036341	disease	Mental Disorders	Mental or Behavioral Dysfunction	2872	2897	0.1	1	1	1	2019	2019
VWC2L	402117	Mood Disorders	C0525045	group	Mental Disorders	Mental or Behavioral Dysfunction	580	308	0.1	1	1	1	2018	2018
VWC2L	402117	mathematical ability	C0596887	phenotype		Mental Process	854	2127	0.1	1	1	2	2018	2018
VWC2L	402117	Major Depressive Disorder	C1269683	disease	Mental Disorders	Mental or Behavioral Dysfunction	1236	1451	0.1	1	1	1	2018	2018
TAFA5	25817	Pancreatic carcinoma	C0235974	disease	Digestive System Diseases; Neoplasms; Endocrine System Diseases	Neoplastic Process	2689	322	0.1	1	1	1	2011	2011
TAFA5	25817	Malignant neoplasm of pancreas	C0346647	disease	Digestive System Diseases; Neoplasms; Endocrine System Diseases	Neoplastic Process	2667	277	0.1	1	1	1	2011	2011
TAFA5	25817	Adenovirus Infections	C0001486	group	Infections	Disease or Syndrome	145	0	0.01	1	1	0	2018	2018
TAFA5	25817	Malignant Neoplasms	C0006826	group	Neoplasms	Neoplastic Process	8621	1641	0.01	1	1	0	2019	2019
TAFA5	25817	Diabetes	C0011847	disease	Endocrine System Diseases	Disease or Syndrome	2359	710	0.01	1	1	0	2019	2019
TAFA5	25817	Diabetes Mellitus	C0011849	group	Nutritional and Metabolic Diseases; Endocrine System Diseases	Disease or Syndrome	2803	824	0.01	1	1	0	2019	2019
TAFA5	25817	Diabetes Mellitus, Non-Insulin-Dependent	C0011860	disease	Nutritional and Metabolic Diseases; Endocrine System Diseases	Disease or Syndrome	3134	2672	0.01	1	1	0	2019	2019
TAFA5	25817	Malignant neoplasm of stomach	C0024623	disease	Digestive System Diseases; Neoplasms	Neoplastic Process	3806	615	0.01	1	1	0	2019	2019
TAFA5	25817	Metabolic Diseases	C0025517	group	Nutritional and Metabolic Diseases	Disease or Syndrome	945	50	0.01	1	1	0	2019	2019
TAFA5	25817	Neoplasm Metastasis	C0027627	phenotype	Pathological Conditions, Signs and Symptoms; Neoplasms	Neoplastic Process	6385	327	0.01	1	1	0	2019	2019
TAFA5	25817	Neoplasms	C0027651	group	Neoplasms	Neoplastic Process	10161	1644	0.01	1	1	0	2019	2019
TAFA5	25817	Neuromyelitis Optica	C0027873	disease	Eye Diseases; Immune System Diseases; Nervous System Diseases	Disease or Syndrome	171	45	0.01	1	1	0	2019	2019
TAFA5	25817	Obesity	C0028754	disease	Pathological Conditions, Signs and Symptoms; Nutritional and Metabolic Diseases	Disease or Syndrome	2821	1111	0.01	1	1	0	2018	2018
TAFA5	25817	Stomach Carcinoma	C0699791	disease	Digestive System Diseases; Neoplasms	Neoplastic Process	3720	652	0.01	1	1	0	2019	2019
TAFA5	25817	Primary malignant neoplasm	C1306459	group	Neoplasms	Neoplastic Process	8221	1374	0.01	1	1	0	2019	2019
TAFA2	338811	Anxiety Disorders	C0003469	group	Mental Disorders	Mental or Behavioral Dysfunction	840	163	0.3	1	1	0	2018	2018
TAFA2	338811	Mental deterioration	C0234985	phenotype	Mental Disorders	Mental or Behavioral Dysfunction	508	121	0.3	1	1	0	2018	2018
TAFA2	338811	Impaired cognition	C0338656	disease	Mental Disorders	Mental or Behavioral Dysfunction	1630	348	0.3	1	1	0	2018	2018
TAFA2	338811	Anxiety States, Neurotic	C0376280	disease	Mental Disorders	Mental or Behavioral Dysfunction	44	0	0.3	1	1	0	2018	2018
TAFA2	338811	Mild cognitive disorder	C1270972	disease	Mental Disorders	Mental or Behavioral Dysfunction	430	96	0.3	1	1	0	2018	2018
TAFA2	338811	Anxiety neurosis (finding)	C1279420	disease	Mental Disorders	Mental or Behavioral Dysfunction	75	5	0.3	1	1	0	2018	2018
TAFA2	338811	Anorexia Nervosa	C0003125	disease	Mental Disorders	Mental or Behavioral Dysfunction	202	72	0.1	1	2	1	2017	2018
TAFA2	338811	Chronic Obstructive Airway Disease	C0024117	disease	Respiratory Tract Diseases	Disease or Syndrome	1428	852	0.1	1	2	2	2014	2015
TAFA2	338811	Obsessive-Compulsive Disorder	C0028768	disease	Mental Disorders	Mental or Behavioral Dysfunction	175	112	0.1	1	1	1	2018	2018
TAFA2	338811	Polysomnography	C0162701	phenotype		Diagnostic Procedure	119	249	0.1	1	1	1	2012	2012
TAFA2	338811	Diastolic blood pressure	C0428883	phenotype		Clinical Attribute	507	1037	0.1	1	1	1	2018	2018
TAFA2	338811	Body mass index	C1305855	phenotype		Clinical Attribute	1014	2689	0.1	1	2	2	2012	2019
TAFA2	338811	response to bronchodilator	C3548479	phenotype		Organism Function	131	1106	0.1	1	1	5	2015	2015
TAFA2	338811	Mental impairment	C0683322	disease		Mental or Behavioral Dysfunction	67	14	0.02	1	2	0	2005	2018
TAFA2	338811	Mild Mental Retardation	C0026106	disease	Pathological Conditions, Signs and Symptoms; Nervous System Diseases; Mental Disorders; Behavior and Behavior Mechanisms	Mental or Behavioral Dysfunction	340	56	0.01	1	1	0	2018	2018
STC2	8614	Malignant neoplasm of breast	C0006142	disease	Neoplasms; Skin and Connective Tissue Diseases	Neoplastic Process	6941	3417	0.35	1	5	0	2002	2019
STC2	8614	Breast Carcinoma	C0678222	disease	Neoplasms; Skin and Connective Tissue Diseases	Neoplastic Process	6776	2793	0.35	1	5	0	2002	2019
STC2	8614	Mammary Neoplasms	C1458155	group	Neoplasms; Skin and Connective Tissue Diseases	Neoplastic Process	2780	385	0.34	1	4	0	2007	2018
STC2	8614	Endometriosis	C0014175	disease	Female Urogenital Diseases and Pregnancy Complications	Disease or Syndrome	1188	274	0.3	1	1	0	2011	2011
STC2	8614	Endometrioma	C0269102	disease	Female Urogenital Diseases and Pregnancy Complications	Neoplastic Process	279	4	0.3	1	1	0	2011	2011
STC2	8614	Non-alcoholic Fatty Liver Disease	C0400966	disease	Digestive System Diseases	Disease or Syndrome	1058	222	0.3	1	1	0	2014	2014
STC2	8614	Mammary Neoplasms, Human	C1257931	disease	Neoplasms; Skin and Connective Tissue Diseases	Neoplastic Process	527	0	0.3	1	1	0	2008	2008
STC2	8614	Nonalcoholic Steatohepatitis	C3241937	disease	Digestive System Diseases	Disease or Syndrome	434	17	0.3	1	1	0	2014	2014
STC2	8614	Mammary Carcinoma, Human	C4704874	disease	Neoplasms; Skin and Connective Tissue Diseases	Neoplastic Process	545	0	0.3	1	1	0	2008	2008
STC2	8614	Mammary Neoplasms, Experimental	C0024668	phenotype	Neoplasms	Neoplastic Process; Experimental Model of Disease	218	0	0.2	1	1	0	2008	2008
STC2	8614	Reperfusion Injury	C0035126	disease	Pathological Conditions, Signs and Symptoms; Cardiovascular Diseases	Injury or Poisoning	300	0	0.2	1	1	0	2004	2004
STC2	8614	Birth Weight	C0005612	phenotype	Pathological Conditions, Signs and Symptoms	Organism Attribute	214	369	0.1	1	1	1	2019	2019
STC2	8614	Body Height	C0005890	phenotype		Organism Attribute	1903	3972	0.1	1	1	1	2019	2019
STC2	8614	Neoplasms	C0027651	group	Neoplasms	Neoplastic Process	10161	1644	0.1	1	13	0	2002	2019
STC2	8614	Waist-Hip Ratio	C0205682	phenotype		Organism Attribute	565	1138	0.1	1	1	1	2019	2019
STC2	8614	Tumor Cell Invasion	C1269955	phenotype		Neoplastic Process	6626	169	0.1	1	13	0	2009	2019
STC2	8614	Malignant Neoplasms	C0006826	group	Neoplasms	Neoplastic Process	8621	1641	0.08	1	8	0	2009	2019
STC2	8614	Secondary malignant neoplasm of lymph node	C0686619	disease	Pathological Conditions, Signs and Symptoms; Neoplasms	Neoplastic Process	2825	188	0.08	1	8	0	2004	2019
STC2	8614	Neoplasm Metastasis	C0027627	phenotype	Pathological Conditions, Signs and Symptoms; Neoplasms	Neoplastic Process	6385	327	0.07	1	7	0	2010	2019
STC2	8614	Primary malignant neoplasm	C1306459	group	Neoplasms	Neoplastic Process	8221	1374	0.06	1	6	0	2009	2019
STC2	8614	Colorectal Carcinoma	C0009402	disease	Digestive System Diseases; Neoplasms	Neoplastic Process	5473	1962	0.05	1	5	0	2009	2019
STC2	8614	Malignant neoplasm of stomach	C0024623	disease	Digestive System Diseases; Neoplasms	Neoplastic Process	3806	615	0.04	0.75	4	0	2010	2019
STC2	8614	Stomach Carcinoma	C0699791	disease	Digestive System Diseases; Neoplasms	Neoplastic Process	3720	652	0.04	0.75	4	0	2010	2019
STC2	8614	Squamous cell carcinoma of the head and neck	C1168401	disease	Neoplasms	Neoplastic Process	1543	348	0.04	1	4	0	2017	2019
STC2	8614	Liver carcinoma	C2239176	disease	Digestive System Diseases; Neoplasms	Neoplastic Process	5725	942	0.04	1	4	0	2012	2019
STC2	8614	Malignant neoplasm of colon and/or rectum	C4722085	disease		Neoplastic Process	3669	502	0.04	1	4	0	2009	2019
STC2	8614	Arteriosclerosis	C0003850	disease	Cardiovascular Diseases	Disease or Syndrome	2006	267	0.03	1	3	0	2016	2019
STC2	8614	Atherosclerosis	C0004153	disease	Cardiovascular Diseases	Disease or Syndrome	2044	281	0.03	1	3	0	2016	2019
STC2	8614	Tumor Progression	C0178874	phenotype	Pathological Conditions, Signs and Symptoms	Neoplastic Process	3865	72	0.03	1	3	0	2010	2019
STC2	8614	Malignant tumor of cervix	C0007847	disease	Neoplasms; Female Urogenital Diseases and Pregnancy Complications	Neoplastic Process	1718	245	0.02	1	2	0	2015	2016
STC2	8614	Squamous cell carcinoma of esophagus	C0279626	disease	Digestive System Diseases; Neoplasms	Neoplastic Process	2053	329	0.02	1	2	0	2011	2013
STC2	8614	Laryngeal Squamous Cell Carcinoma	C0280324	disease	Neoplasms; Respiratory Tract Diseases; Otorhinolaryngologic Diseases	Neoplastic Process	504	30	0.02	1	2	0	2014	2019
STC2	8614	Cervix carcinoma	C0302592	disease	Neoplasms; Female Urogenital Diseases and Pregnancy Complications	Neoplastic Process	1881	283	0.02	1	2	0	2015	2016
STC2	8614	ovarian neoplasm	C0919267	disease	Neoplasms; Female Urogenital Diseases and Pregnancy Complications; Endocrine System Diseases	Neoplastic Process	2542	757	0.02	1	2	0	2010	2015
STC2	8614	Malignant neoplasm of ovary	C1140680	disease	Neoplasms; Female Urogenital Diseases and Pregnancy Complications; Endocrine System Diseases	Neoplastic Process	2563	315	0.02	1	2	0	2010	2015
STC2	8614	Secondary Neoplasm	C2939419	group	Pathological Conditions, Signs and Symptoms; Neoplasms	Neoplastic Process	2492	85	0.02	1	2	0	2019	2019
STC2	8614	cervical cancer	C4048328	disease	Neoplasms; Female Urogenital Diseases and Pregnancy Complications	Neoplastic Process	1817	268	0.02	1	2	0	2015	2016
STC2	8614	Carcinoma, Ovarian Epithelial	C4721610	disease	Neoplasms; Female Urogenital Diseases and Pregnancy Complications; Endocrine System Diseases	Neoplastic Process	2841	327	0.02	1	2	0	2010	2015
STC2	8614	Anemia of chronic disease	C0002873	phenotype	Hemic and Lymphatic Diseases	Disease or Syndrome	100	1	0.01	1	1	0	2018	2018
STC2	8614	Refractory anemias	C0002893	disease	Hemic and Lymphatic Diseases	Disease or Syndrome	340	11	0.01	1	1	0	2008	2008
STC2	8614	Rheumatoid Arthritis	C0003873	disease	Skin and Connective Tissue Diseases; Musculoskeletal Diseases; Immune System Diseases	Disease or Syndrome	2723	2387	0.01	1	1	0	2008	2008
STC2	8614	Malignant neoplasm of endometrium	C0007103	disease	Neoplasms; Female Urogenital Diseases and Pregnancy Complications	Neoplastic Process	1235	197	0.01	1	1	0	2019	2019
STC2	8614	Rectal Carcinoma	C0007113	disease	Digestive System Diseases; Neoplasms	Neoplastic Process	472	112	0.01	1	1	0	2018	2018
STC2	8614	Diabetes Mellitus	C0011849	group	Nutritional and Metabolic Diseases; Endocrine System Diseases	Disease or Syndrome	2803	824	0.01	1	1	0	2018	2018
STC2	8614	Esophageal Neoplasms	C0014859	group	Digestive System Diseases; Neoplasms	Neoplastic Process	1254	270	0.01	1	1	0	2011	2011
STC2	8614	Fatty Liver	C0015695	disease	Digestive System Diseases	Disease or Syndrome	875	35	0.01	1	1	0	2018	2018
STC2	8614	Glioblastoma	C0017636	disease	Neoplasms	Neoplastic Process	3177	281	0.01	1	1	0	2018	2018
STC2	8614	Heart failure	C0018801	disease	Cardiovascular Diseases	Disease or Syndrome	1499	201	0.01	1	1	0	2018	2018
STC2	8614	Congestive heart failure	C0018802	disease	Cardiovascular Diseases	Disease or Syndrome	1760	165	0.01	1	1	0	2018	2018
STC2	8614	Hypertriglyceridemia	C0020557	phenotype	Nutritional and Metabolic Diseases	Disease or Syndrome	340	169	0.01	1	1	0	2018	2018
STC2	8614	Chronic Obstructive Airway Disease	C0024117	disease	Respiratory Tract Diseases	Disease or Syndrome	1428	852	0.01	1	1	0	2019	2019
STC2	8614	Lymphatic Metastasis	C0024232	disease	Pathological Conditions, Signs and Symptoms; Neoplasms	Neoplastic Process	463	10	0.01	1	1	0	2014	2014
STC2	8614	Metabolic Diseases	C0025517	group	Nutritional and Metabolic Diseases	Disease or Syndrome	945	50	0.01	1	1	0	2018	2018
STC2	8614	Neuroblastoma	C0027819	disease	Neoplasms	Neoplastic Process	2509	386	0.01	1	1	0	2009	2009
STC2	8614	Pancreatitis	C0030305	disease	Digestive System Diseases	Disease or Syndrome	502	80	0.01	1	1	0	2011	2011
STC2	8614	Retinoblastoma	C0035335	disease	Neoplasms; Eye Diseases	Neoplastic Process	853	193	0.01	1	1	0	2010	2010
STC2	8614	Hyperphosphatemia (disorder)	C0085681	disease	Nutritional and Metabolic Diseases	Disease or Syndrome	65	1	0.01	1	1	0	2012	2012
STC2	8614	Esophageal carcinoma	C0152018	disease	Digestive System Diseases; Neoplasms	Neoplastic Process	1287	272	0.01	1	1	0	2011	2011
STC2	8614	Malignant neoplasm of lung	C0242379	disease	Neoplasms; Respiratory Tract Diseases	Neoplastic Process	4173	1142	0.01	1	1	0	2019	2019
STC2	8614	Disseminated neuroblastoma	C0278694	disease	Neoplasms	Neoplastic Process	56	0	0.01	1	1	0	2009	2009
STC2	8614	Adult Glioblastoma	C0278878	disease	Neoplasms	Neoplastic Process	2528	98	0.01	1	1	0	2018	2018
STC2	8614	Childhood Glioblastoma	C0280474	disease	Neoplasms	Neoplastic Process	2527	98	0.01	1	1	0	2018	2018
STC2	8614	Adenocarcinoma of colon	C0338106	disease	Digestive System Diseases; Neoplasms	Neoplastic Process	406	10	0.01	1	1	0	2019	2019
STC2	8614	Hypothalamic amenorrhea	C0341862	disease	Nervous System Diseases; Endocrine System Diseases	Disease or Syndrome	10	2	0.01	1	1	0	2019	2019
STC2	8614	Malignant neoplasm of prostate	C0376358	disease	Neoplasms; Male Urogenital Diseases	Neoplastic Process	4502	1082	0.01	1	1	0	2009	2009
STC2	8614	Endometrial Carcinoma	C0476089	disease	Neoplasms; Female Urogenital Diseases and Pregnancy Complications	Neoplastic Process	1597	326	0.01	1	1	0	2019	2019
STC2	8614	Malignant neoplasm of esophagus	C0546837	disease	Digestive System Diseases; Neoplasms	Neoplastic Process	1286	214	0.01	1	1	0	2011	2011
STC2	8614	Prostate carcinoma	C0600139	disease	Neoplasms; Male Urogenital Diseases	Neoplastic Process	4388	1168	0.01	1	1	0	2009	2009
STC2	8614	Carcinoma of lung	C0684249	disease	Neoplasms; Respiratory Tract Diseases	Neoplastic Process	4081	1204	0.01	1	1	0	2019	2019
STC2	8614	Central neuroblastoma	C0700095	disease	Neoplasms; Nervous System Diseases	Neoplastic Process	2419	231	0.01	1	1	0	2009	2009
STC2	8614	Middle Cerebral Artery Occlusion	C0740391	disease	Pathological Conditions, Signs and Symptoms; Nervous System Diseases; Cardiovascular Diseases	Acquired Abnormality	626	0	0.01	1	1	0	2004	2004
STC2	8614	Stage 4S neuroblastoma	C1135161	disease		Neoplastic Process	45	0	0.01	1	1	0	2009	2009
STC2	8614	Avellino corneal dystrophy	C1275685	disease	Congenital, Hereditary, and Neonatal Diseases and Abnormalities; Eye Diseases	Disease or Syndrome	115	14	0.01	1	1	0	2018	2018
STC2	8614	Primary malignant neoplasm of lung	C1306460	disease	Neoplasms; Respiratory Tract Diseases	Neoplastic Process	3894	981	0.01	1	1	0	2019	2019
STC2	8614	Hormone refractory prostate cancer	C1328504	disease	Neoplasms; Male Urogenital Diseases	Neoplastic Process	683	29	0.01	1	1	0	2009	2009
STC2	8614	Non-Hereditary Clear Cell Renal Cell Carcinoma	C1334978	disease	Neoplasms; Female Urogenital Diseases and Pregnancy Complications; Male Urogenital Diseases	Neoplastic Process	15	0	0.01	1	1	0	2012	2012
STC2	8614	ST segment elevation myocardial infarction	C1536220	disease	Pathological Conditions, Signs and Symptoms; Cardiovascular Diseases	Disease or Syndrome	264	16	0.01	1	1	0	2018	2018
STC2	8614	Glioblastoma Multiforme	C1621958	disease	Neoplasms	Neoplastic Process	3197	186	0.01	1	1	0	2018	2018
STC2	8614	Cardio-Renal Syndrome	C2242703	disease	Female Urogenital Diseases and Pregnancy Complications; Male Urogenital Diseases; Cardiovascular Diseases	Disease or Syndrome	21	0	0.01	1	1	0	2012	2012
STC2	8614	Steatohepatitis	C2711227	disease	Digestive System Diseases	Disease or Syndrome	1143	75	0.01	1	1	0	2018	2018
STC2	8614	Nasopharyngeal carcinoma	C2931822	disease	Neoplasms; Stomatognathic Diseases; Otorhinolaryngologic Diseases	Neoplastic Process	1553	320	0.01	1	1	0	2019	2019
STC2	8614	Oestrogen receptor positive breast cancer	C2938924	disease		Neoplastic Process	510	58	0.01	1	1	0	2019	2019
STC2	8614	Luminal A Breast Carcinoma	C3642345	disease		Neoplastic Process	153	11	0.01	1	1	0	2019	2019
STC2	8614	Childhood Neuroblastoma	C4086165	disease	Neoplasms	Neoplastic Process	2420	231	0.01	1	1	0	2009	2009
STC2	8614	Fatty Liver Disease	C4529962	disease		Disease or Syndrome	741	81	0.01	1	1	0	2014	2014
STC2	8614	Amyloidosis cutis dyschromia	C4554601	disease	Congenital, Hereditary, and Neonatal Diseases and Abnormalities; Nutritional and Metabolic Diseases; Skin and Connective Tissue Diseases	Disease or Syndrome	84	1	0.01	1	1	0	2018	2018
STC2	8614	Metastatic Neuroblastoma	C4722306	disease	Neoplasms	Neoplastic Process	31	0	0.01	1	1	0	2009	2009
STC2	8614	progesterone receptor-positive breast cancer	C4733094	disease		Neoplastic Process	28	17	0.01	1	1	0	2004	2004
STC1	6781	Reperfusion Injury	C0035126	disease	Pathological Conditions, Signs and Symptoms; Cardiovascular Diseases	Injury or Poisoning	300	0	0.2	1	1	0	2004	2004
STC1	6781	Malignant Neoplasms	C0006826	group	Neoplasms	Neoplastic Process	8621	1641	0.1	1	16	0	2000	2020
STC1	6781	Neoplasm Metastasis	C0027627	phenotype	Pathological Conditions, Signs and Symptoms; Neoplasms	Neoplastic Process	6385	327	0.1	1	14	0	2003	2020
STC1	6781	Neoplasms	C0027651	group	Neoplasms	Neoplastic Process	10161	1644	0.1	1	18	0	2005	2020
STC1	6781	Carcinogenesis	C0596263	phenotype	Pathological Conditions, Signs and Symptoms; Neoplasms	Neoplastic Process	6243	355	0.1	1	11	0	2010	2019
STC1	6781	Breast Carcinoma	C0678222	disease	Neoplasms; Skin and Connective Tissue Diseases	Neoplastic Process	6776	2793	0.1	1	10	0	2002	2019
STC1	6781	Primary malignant neoplasm	C1306459	group	Neoplasms	Neoplastic Process	8221	1374	0.1	1	13	0	2000	2020
STC1	6781	Malignant neoplasm of breast	C0006142	disease	Neoplasms; Skin and Connective Tissue Diseases	Neoplastic Process	6941	3417	0.09	1	9	0	2003	2019
STC1	6781	Tumor Cell Invasion	C1269955	phenotype		Neoplastic Process	6626	169	0.08	1	8	0	2012	2019
STC1	6781	Mammary Neoplasms	C1458155	group	Neoplasms; Skin and Connective Tissue Diseases	Neoplastic Process	2780	385	0.04	1	4	0	2003	2018
STC1	6781	Liver carcinoma	C2239176	disease	Digestive System Diseases; Neoplasms	Neoplastic Process	5725	942	0.04	1	4	0	2000	2018
STC1	6781	Colorectal Carcinoma	C0009402	disease	Digestive System Diseases; Neoplasms	Neoplastic Process	5473	1962	0.03	1	3	0	2000	2013
STC1	6781	Glioblastoma	C0017636	disease	Neoplasms	Neoplastic Process	3177	281	0.03	1	3	0	2018	2019
STC1	6781	Malignant neoplasm of stomach	C0024623	disease	Digestive System Diseases; Neoplasms	Neoplastic Process	3806	615	0.03	1	3	0	2011	2019
STC1	6781	Tumor Progression	C0178874	phenotype	Pathological Conditions, Signs and Symptoms	Neoplastic Process	3865	72	0.03	1	3	0	2016	2019
STC1	6781	Adult Glioblastoma	C0278878	disease	Neoplasms	Neoplastic Process	2528	98	0.03	1	3	0	2018	2019
STC1	6781	Squamous cell carcinoma of esophagus	C0279626	disease	Digestive System Diseases; Neoplasms	Neoplastic Process	2053	329	0.03	1	3	0	2012	2020
STC1	6781	Childhood Glioblastoma	C0280474	disease	Neoplasms	Neoplastic Process	2527	98	0.03	1	3	0	2018	2019
STC1	6781	Malignant neoplasm of prostate	C0376358	disease	Neoplasms; Male Urogenital Diseases	Neoplastic Process	4502	1082	0.03	1	3	0	2012	2020
STC1	6781	Prostate carcinoma	C0600139	disease	Neoplasms; Male Urogenital Diseases	Neoplastic Process	4388	1168	0.03	1	3	0	2012	2020
STC1	6781	Stomach Carcinoma	C0699791	disease	Digestive System Diseases; Neoplasms	Neoplastic Process	3720	652	0.03	1	3	0	2011	2019
STC1	6781	Glioblastoma Multiforme	C1621958	disease	Neoplasms	Neoplastic Process	3197	186	0.03	1	3	0	2018	2019
STC1	6781	Malignant neoplasm of colon and/or rectum	C4722085	disease		Neoplastic Process	3669	502	0.03	1	3	0	2000	2013
STC1	6781	Malignant neoplasm of thyroid	C0007115	disease	Neoplasms; Endocrine System Diseases	Neoplastic Process	949	103	0.02	1	2	0	2015	2016
STC1	6781	Cerebral Infarction	C0007785	disease	Pathological Conditions, Signs and Symptoms; Nervous System Diseases; Cardiovascular Diseases	Disease or Syndrome	687	123	0.02	1	2	0	2015	2020
STC1	6781	Malignant tumor of cervix	C0007847	disease	Neoplasms; Female Urogenital Diseases and Pregnancy Complications	Neoplastic Process	1718	245	0.02	1	2	0	2013	2017
STC1	6781	Constipation	C0009806	phenotype	Pathological Conditions, Signs and Symptoms	Sign or Symptom	424	57	0.02	1	2	0	2002	2017
STC1	6781	Endometriosis	C0014175	disease	Female Urogenital Diseases and Pregnancy Complications	Disease or Syndrome	1188	274	0.02	0.5	2	0	2016	2020
STC1	6781	Glioma	C0017638	disease	Neoplasms	Neoplastic Process	3097	353	0.02	1	2	0	2015	2018
STC1	6781	Retinitis Pigmentosa	C0035334	disease	Congenital, Hereditary, and Neonatal Diseases and Abnormalities; Eye Diseases	Disease or Syndrome	546	541	0.02	1	2	0	2012	2017
STC1	6781	Thyroid Neoplasm	C0040136	disease	Neoplasms; Endocrine System Diseases	Neoplastic Process	1164	135	0.02	1	2	0	2015	2016
STC1	6781	Acute leukemia	C0085669	disease	Pathological Conditions, Signs and Symptoms; Neoplasms	Neoplastic Process	639	50	0.02	1	2	0	2004	2016
STC1	6781	Conventional (Clear Cell) Renal Cell Carcinoma	C0279702	disease	Neoplasms; Female Urogenital Diseases and Pregnancy Complications; Male Urogenital Diseases	Neoplastic Process	2346	222	0.02	1	2	0	2015	2018
STC1	6781	Cervix carcinoma	C0302592	disease	Neoplasms; Female Urogenital Diseases and Pregnancy Complications	Neoplastic Process	1881	283	0.02	1	2	0	2013	2017
STC1	6781	Thyroid carcinoma	C0549473	disease	Neoplasms; Endocrine System Diseases	Neoplastic Process	1175	145	0.02	1	2	0	2015	2016
STC1	6781	ovarian neoplasm	C0919267	disease	Neoplasms; Female Urogenital Diseases and Pregnancy Complications; Endocrine System Diseases	Neoplastic Process	2542	757	0.02	1	2	0	2010	2019
STC1	6781	Ischemic stroke	C0948008	disease	Nervous System Diseases; Cardiovascular Diseases	Disease or Syndrome	1159	704	0.02	0.5	2	0	2017	2020
STC1	6781	Malignant neoplasm of ovary	C1140680	disease	Neoplasms; Female Urogenital Diseases and Pregnancy Complications; Endocrine System Diseases	Neoplastic Process	2563	315	0.02	1	2	0	2010	2019
STC1	6781	cervical cancer	C4048328	disease	Neoplasms; Female Urogenital Diseases and Pregnancy Complications	Neoplastic Process	1817	268	0.02	1	2	0	2013	2017
STC1	6781	Carcinoma, Ovarian Epithelial	C4721610	disease	Neoplasms; Female Urogenital Diseases and Pregnancy Complications; Endocrine System Diseases	Neoplastic Process	2841	327	0.02	1	2	0	2010	2019
STC1	6781	Alzheimer's Disease	C0002395	disease	Nervous System Diseases; Mental Disorders	Disease or Syndrome	3397	1843	0.01	1	1	0	2017	2017
STC1	6781	Anoxia	C0003130	phenotype	Pathological Conditions, Signs and Symptoms	Pathologic Function	287	0	0.01	1	1	0	2005	2005
STC1	6781	Asthma	C0004096	disease	Respiratory Tract Diseases; Immune System Diseases	Disease or Syndrome	2096	1536	0.01	1	1	0	2018	2018
STC1	6781	Carcinoid Tumor	C0007095	phenotype	Neoplasms	Neoplastic Process	267	3	0.01	1	1	0	2003	2003
STC1	6781	Malignant neoplasm of endometrium	C0007103	disease	Neoplasms; Female Urogenital Diseases and Pregnancy Complications	Neoplastic Process	1235	197	0.01	1	1	0	2008	2008
STC1	6781	Non-Small Cell Lung Carcinoma	C0007131	disease	Neoplasms; Respiratory Tract Diseases	Neoplastic Process	3926	712	0.01	1	1	0	2011	2011
STC1	6781	Renal Cell Carcinoma	C0007134	disease	Neoplasms; Female Urogenital Diseases and Pregnancy Complications; Male Urogenital Diseases	Neoplastic Process	2084	288	0.01	1	1	0	2018	2018
STC1	6781	Squamous cell carcinoma	C0007137	disease	Neoplasms	Neoplastic Process	2507	257	0.01	1	1	0	2012	2012
STC1	6781	Brain Ischemia	C0007786	disease	Nervous System Diseases; Cardiovascular Diseases	Disease or Syndrome	358	5	0.01	1	1	0	2007	2007
STC1	6781	Congenital chromosomal disease	C0008626	group	Congenital, Hereditary, and Neonatal Diseases and Abnormalities	Congenital Abnormality	757	47	0.01	1	1	0	2010	2010
STC1	6781	Colonic Neoplasms	C0009375	group	Digestive System Diseases; Neoplasms	Neoplastic Process	947	45	0.01	1	1	0	2002	2002
STC1	6781	Colorectal Neoplasms	C0009404	group	Digestive System Diseases; Neoplasms	Neoplastic Process	1296	609	0.01	1	1	0	2008	2008
STC1	6781	Presenile dementia	C0011265	disease	Nervous System Diseases; Mental Disorders	Mental or Behavioral Dysfunction	718	159	0.01	1	1	0	2017	2017
STC1	6781	Diabetes	C0011847	disease	Endocrine System Diseases	Disease or Syndrome	2359	710	0.01	1	1	0	2017	2017
STC1	6781	Diabetes Mellitus	C0011849	group	Nutritional and Metabolic Diseases; Endocrine System Diseases	Disease or Syndrome	2803	824	0.01	1	1	0	2017	2017
STC1	6781	Diabetes Mellitus, Non-Insulin-Dependent	C0011860	disease	Nutritional and Metabolic Diseases; Endocrine System Diseases	Disease or Syndrome	3134	2672	0.01	1	1	0	2019	2019
STC1	6781	Diabetic Nephropathy	C0011881	disease	Female Urogenital Diseases and Pregnancy Complications; Male Urogenital Diseases; Endocrine System Diseases	Disease or Syndrome	1189	238	0.01	1	1	0	2019	2019
STC1	6781	Dwarfism	C0013336	disease	Congenital, Hereditary, and Neonatal Diseases and Abnormalities; Musculoskeletal Diseases; Endocrine System Diseases	Congenital Abnormality	1261	77	0.01	1	1	0	2002	2002
STC1	6781	Ependymoma	C0014474	disease	Neoplasms	Neoplastic Process	244	8	0.01	1	1	0	2006	2006
STC1	6781	Esophageal Diseases	C0014852	group	Digestive System Diseases	Disease or Syndrome	19	1	0.01	1	1	0	2012	2012
STC1	6781	Esophageal Neoplasms	C0014859	group	Digestive System Diseases; Neoplasms	Neoplastic Process	1254	270	0.01	1	1	0	2012	2012
STC1	6781	Glycogen storage disease type II	C0017921	disease	Congenital, Hereditary, and Neonatal Diseases and Abnormalities; Nutritional and Metabolic Diseases; Nervous System Diseases	Disease or Syndrome	194	269	0.01	1	1	0	2012	2012
STC1	6781	Heart failure	C0018801	disease	Cardiovascular Diseases	Disease or Syndrome	1499	201	0.01	1	1	0	2003	2003
STC1	6781	Congestive heart failure	C0018802	disease	Cardiovascular Diseases	Disease or Syndrome	1760	165	0.01	1	1	0	2003	2003
STC1	6781	Hirschsprung Disease	C0019569	disease	Congenital, Hereditary, and Neonatal Diseases and Abnormalities; Digestive System Diseases	Disease or Syndrome	384	162	0.01	1	1	0	2002	2002
STC1	6781	Hypercalcemia	C0020437	disease	Nutritional and Metabolic Diseases	Disease or Syndrome	157	9	0.01	1	1	0	2007	2007
STC1	6781	Inflammation	C0021368	phenotype	Pathological Conditions, Signs and Symptoms	Pathologic Function	467	0	0.01	1	1	0	2008	2008
STC1	6781	insulinoma	C0021670	disease	Digestive System Diseases; Neoplasms; Endocrine System Diseases	Neoplastic Process	258	8	0.01	1	1	0	2003	2003
STC1	6781	leukemia	C0023418	disease	Neoplasms	Neoplastic Process	2111	144	0.01	1	1	0	2004	2004
STC1	6781	Acute lymphocytic leukemia	C0023449	disease	Neoplasms; Immune System Diseases; Hemic and Lymphatic Diseases	Neoplastic Process	1293	222	0.01	1	1	0	2016	2016
STC1	6781	Leukemia, Myelocytic, Acute	C0023467	disease	Neoplasms	Neoplastic Process	3111	6892	0.01	1	1	0	2016	2016
STC1	6781	liposarcoma	C0023827	disease	Neoplasms	Neoplastic Process	200	6	0.01	1	1	0	2004	2004
STC1	6781	Lung diseases	C0024115	group	Respiratory Tract Diseases	Disease or Syndrome	700	50	0.01	1	1	0	2011	2011
STC1	6781	melanoma	C0025202	disease	Neoplasms	Neoplastic Process	3087	515	0.01	1	1	0	2016	2016
STC1	6781	Obesity	C0028754	disease	Pathological Conditions, Signs and Symptoms; Nutritional and Metabolic Diseases	Disease or Syndrome	2821	1111	0.01	1	1	0	2017	2017
STC1	6781	Degenerative polyarthritis	C0029408	disease	Musculoskeletal Diseases	Disease or Syndrome	1827	247	0.01	1	1	0	2019	2019
STC1	6781	Polycystic Ovary Syndrome	C0032460	disease	Neoplasms; Female Urogenital Diseases and Pregnancy Complications; Endocrine System Diseases	Disease or Syndrome	988	363	0.01	0	1	0	2020	2020
STC1	6781	Pulmonary Fibrosis	C0034069	disease	Respiratory Tract Diseases	Disease or Syndrome	924	25	0.01	1	1	0	2015	2015
STC1	6781	Retinal Diseases	C0035309	group	Eye Diseases	Disease or Syndrome	714	56	0.01	1	1	0	2020	2020
STC1	6781	Retinoblastoma	C0035335	disease	Neoplasms; Eye Diseases	Neoplastic Process	853	193	0.01	1	1	0	2011	2011
STC1	6781	Retinopathy of Prematurity	C0035344	disease	Congenital, Hereditary, and Neonatal Diseases and Abnormalities; Eye Diseases	Disease or Syndrome	202	16	0.01	1	1	0	2020	2020
STC1	6781	Cerebrovascular accident	C0038454	group	Nervous System Diseases; Cardiovascular Diseases	Disease or Syndrome	1658	591	0.01	1	1	0	2020	2020
STC1	6781	Ureteral obstruction	C0041956	phenotype	Female Urogenital Diseases and Pregnancy Complications; Male Urogenital Diseases	Disease or Syndrome	359	0	0.01	1	1	0	2004	2004
STC1	6781	B-Cell Lymphomas	C0079731	group	Neoplasms; Immune System Diseases; Hemic and Lymphatic Diseases	Neoplastic Process	1408	42	0.01	1	1	0	2019	2019
STC1	6781	Choroid Plexus Neoplasms	C0085138	group	Neoplasms; Nervous System Diseases	Neoplastic Process	19	0	0.01	1	1	0	2006	2006
STC1	6781	Small cell carcinoma of lung	C0149925	disease	Neoplasms; Respiratory Tract Diseases	Neoplastic Process	972	125	0.01	1	1	0	2019	2019
STC1	6781	Adenocarcinoma of lung (disorder)	C0152013	disease	Neoplasms	Neoplastic Process	2438	563	0.01	1	1	0	2016	2016
STC1	6781	Esophageal carcinoma	C0152018	disease	Digestive System Diseases; Neoplasms	Neoplastic Process	1287	272	0.01	1	1	0	2012	2012
STC1	6781	Secondary malignant neoplasm of lung	C0153676	disease	Neoplasms; Respiratory Tract Diseases	Neoplastic Process	1370	20	0.01	1	1	0	2017	2017
STC1	6781	Choroid Plexus Papilloma	C0205770	disease	Neoplasms; Nervous System Diseases	Neoplastic Process	64	17	0.01	1	1	0	2006	2006
STC1	6781	Follicular thyroid carcinoma	C0206682	disease	Neoplasms	Neoplastic Process	293	28	0.01	1	1	0	2016	2016
STC1	6781	Transient erythroblastopenia of childhood	C0238478	disease	Congenital, Hereditary, and Neonatal Diseases and Abnormalities; Hemic and Lymphatic Diseases	Disease or Syndrome	23	0	0.01	1	1	0	2018	2018
STC1	6781	Malignant neoplasm of lung	C0242379	disease	Neoplasms; Respiratory Tract Diseases	Neoplastic Process	4173	1142	0.01	1	1	0	2012	2012
STC1	6781	Age related macular degeneration	C0242383	disease	Eye Diseases	Disease or Syndrome	685	663	0.01	1	1	0	2012	2012
STC1	6781	Neoplasm, Residual	C0242596	phenotype	Pathological Conditions, Signs and Symptoms; Neoplasms	Neoplastic Process	329	23	0.01	1	1	0	2004	2004
STC1	6781	Cerebral dysfunction	C0262405	disease	Nervous System Diseases	Disease or Syndrome	45	0	0.01	1	1	0	2020	2020
STC1	6781	Nonexudative age-related macular degeneration	C0271083	disease	Eye Diseases	Acquired Abnormality	3	0	0.01	1	1	0	2012	2012
STC1	6781	Adult Ependymoma	C0278874	disease	Neoplasms	Neoplastic Process	144	3	0.01	1	1	0	2006	2006
STC1	6781	Laryngeal Squamous Cell Carcinoma	C0280324	disease	Neoplasms; Respiratory Tract Diseases; Otorhinolaryngologic Diseases	Neoplastic Process	504	30	0.01	1	1	0	2014	2014
STC1	6781	Carcinoid tumor no ICD-O subtype	C0334299	phenotype	Neoplasms	Neoplastic Process	122	0	0.01	1	1	0	2003	2003
STC1	6781	Eosinophilic esophagitis	C0341106	disease	Digestive System Diseases; Immune System Diseases; Hemic and Lymphatic Diseases	Disease or Syndrome	183	40	0.01	1	1	0	2018	2018
STC1	6781	Constipation - functional	C0401146	disease	Pathological Conditions, Signs and Symptoms	Disease or Syndrome	15	0	0.01	1	1	0	2019	2019
STC1	6781	Osteoarthritis, Knee	C0409959	disease	Musculoskeletal Diseases	Disease or Syndrome	368	150	0.01	1	1	0	2019	2019
STC1	6781	Choroid Plexus Carcinoma	C0431109	disease	Neoplasms; Nervous System Diseases	Neoplastic Process	34	11	0.01	1	1	0	2006	2006
STC1	6781	Endometrial Carcinoma	C0476089	disease	Neoplasms; Female Urogenital Diseases and Pregnancy Complications	Neoplastic Process	1597	326	0.01	1	1	0	2008	2008
STC1	6781	Dementia	C0497327	disease	Nervous System Diseases; Mental Disorders	Mental or Behavioral Dysfunction	816	176	0.01	1	1	0	2017	2017
STC1	6781	Recurrent tumor	C0521158	phenotype		Neoplastic Process	735	33	0.01	1	1	0	2018	2018
STC1	6781	Neurodegenerative Disorders	C0524851	group	Nervous System Diseases	Disease or Syndrome	1515	85	0.01	1	1	0	2017	2017
STC1	6781	Malignant neoplasm of esophagus	C0546837	disease	Digestive System Diseases; Neoplasms	Neoplastic Process	1286	214	0.01	1	1	0	2012	2012
STC1	6781	Malignant Glioma	C0555198	disease	Neoplasms	Neoplastic Process	724	22	0.01	1	1	0	2015	2015
STC1	6781	Cerebral metastasis	C0555278	disease		Neoplastic Process	16	0	0.01	1	1	0	2006	2006
STC1	6781	Intraocular pressure disorder	C0595921	disease	Eye Diseases	Disease or Syndrome	304	56	0.01	1	1	0	2017	2017
STC1	6781	Carcinoma of lung	C0684249	disease	Neoplasms; Respiratory Tract Diseases	Neoplastic Process	4081	1204	0.01	1	1	0	2012	2012
STC1	6781	Secondary malignant neoplasm of lymph node	C0686619	disease	Pathological Conditions, Signs and Symptoms; Neoplasms	Neoplastic Process	2825	188	0.01	1	1	0	2020	2020
STC1	6781	Brain Tumor, Primary	C0750974	disease	Neoplasms; Nervous System Diseases	Neoplastic Process	122	8	0.01	1	1	0	2006	2006
STC1	6781	Newly Diagnosed Childhood Ependymoma	C0796611	disease	Neoplasms	Neoplastic Process	144	3	0.01	1	1	0	2006	2006
STC1	6781	Ductal Carcinoma	C1176475	disease	Neoplasms	Neoplastic Process	273	11	0.01	1	1	0	2004	2004
STC1	6781	Traditional Serrated Adenoma	C1266025	disease	Neoplasms	Neoplastic Process	90	2	0.01	1	1	0	2011	2011
STC1	6781	Primary malignant neoplasm of lung	C1306460	disease	Neoplasms; Respiratory Tract Diseases	Neoplastic Process	3894	981	0.01	1	1	0	2012	2012
STC1	6781	Childhood Leukemia	C1332977	disease	Neoplasms	Neoplastic Process	1740	140	0.01	1	1	0	2004	2004
STC1	6781	Tumor Angiogenesis	C1519670	phenotype	Pathological Conditions, Signs and Symptoms	Neoplastic Process	822	5	0.01	1	1	0	2011	2011
STC1	6781	Benign Prostatic Hyperplasia	C1704272	disease	Male Urogenital Diseases	Disease or Syndrome	770	91	0.01	1	1	0	2020	2020
STC1	6781	Idiopathic Pulmonary Fibrosis	C1800706	disease	Respiratory Tract Diseases	Disease or Syndrome	803	63	0.01	1	1	0	2015	2015
STC1	6781	Progesterone Resistance	C1849699	disease	Female Urogenital Diseases and Pregnancy Complications	Disease or Syndrome	29	0	0.01	1	1	0	2020	2020
STC1	6781	Childhood Ependymoma	C1851584	disease	Neoplasms	Neoplastic Process	147	3	0.01	1	1	0	2006	2006
STC1	6781	Precursor Cell Lymphoblastic Leukemia Lymphoma	C1961102	disease	Neoplasms; Immune System Diseases; Hemic and Lymphatic Diseases	Neoplastic Process	879	168	0.01	1	1	0	2016	2016
STC1	6781	Photoreceptor degeneration	C1998028	disease	Eye Diseases	Disease or Syndrome	136	16	0.01	1	1	0	2012	2012
STC1	6781	Thyroid cancer, follicular	C2931367	disease	Neoplasms	Neoplastic Process	58	5	0.01	1	1	0	2016	2016
STC1	6781	Dystrophia myotonica 2	C2931689	disease	Congenital, Hereditary, and Neonatal Diseases and Abnormalities; Musculoskeletal Diseases; Nervous System Diseases	Disease or Syndrome	118	21	0.01	1	1	0	2018	2018
STC1	6781	Nasopharyngeal carcinoma	C2931822	disease	Neoplasms; Stomatognathic Diseases; Otorhinolaryngologic Diseases	Neoplastic Process	1553	320	0.01	1	1	0	2012	2012
STC1	6781	Secondary Neoplasm	C2939419	group	Pathological Conditions, Signs and Symptoms; Neoplasms	Neoplastic Process	2492	85	0.01	1	1	0	2013	2013
STC1	6781	Bisphosphonate-associated osteonecrosis	C2986536	disease	Pathological Conditions, Signs and Symptoms; Musculoskeletal Diseases; Stomatognathic Diseases	Disease or Syndrome	6	0	0.01	1	1	0	2003	2003
STC1	6781	Luminal A Breast Carcinoma	C3642345	disease		Neoplastic Process	153	11	0.01	1	1	0	2017	2017
STC1	6781	Chronic kidney disease mineral and bone disorder	C4076240	disease	Nutritional and Metabolic Diseases; Female Urogenital Diseases and Pregnancy Complications; Musculoskeletal Diseases; Male Urogenital Diseases; Endocrine System Diseases	Disease or Syndrome	26	0	0.01	1	1	0	2017	2017
STC1	6781	Immune-Mediated Coagulopathy	C4321358	disease	Hemic and Lymphatic Diseases	Disease or Syndrome	11	0	0.01	1	1	0	2002	2002
STC1	6781	High grade glioma	C4722099	disease	Neoplasms	Neoplastic Process	190	15	0.01	1	1	0	2015	2015
STC1	6781	Extrapulmonary Small Cell Carcinoma	C4722419	disease	Neoplasms	Neoplastic Process	157	11	0.01	1	1	0	2012	2012
SPARC	6678	OSTEOGENESIS IMPERFECTA, TYPE XVII	C4225301	disease		Disease or Syndrome	1	2	0.7	1	1	2	2015	2015
SPARC	6678	Osteogenesis Imperfecta	C0029434	disease	Congenital, Hereditary, and Neonatal Diseases and Abnormalities; Skin and Connective Tissue Diseases; Musculoskeletal Diseases	Disease or Syndrome; Congenital Abnormality	90	91	0.52	1	4	0	1991	2018
SPARC	6678	Liver Cirrhosis, Experimental	C0023893	disease	Pathological Conditions, Signs and Symptoms; Digestive System Diseases	Experimental Model of Disease	870	0	0.5	1	3	0	1996	2014
SPARC	6678	Colorectal Carcinoma	C0009402	disease	Digestive System Diseases; Neoplasms	Neoplastic Process	5473	1962	0.4	1	13	0	1995	2019
SPARC	6678	ovarian neoplasm	C0919267	disease	Neoplasms; Female Urogenital Diseases and Pregnancy Complications; Endocrine System Diseases	Neoplastic Process	2542	757	0.38	1	8	0	1999	2019
SPARC	6678	Malignant neoplasm of ovary	C1140680	disease	Neoplasms; Female Urogenital Diseases and Pregnancy Complications; Endocrine System Diseases	Neoplastic Process	2563	315	0.38	1	8	0	1999	2019
SPARC	6678	Malignant tumor of colon	C0007102	disease	Digestive System Diseases; Neoplasms	Neoplastic Process	2969	688	0.34	1	4	0	2007	2019
SPARC	6678	Kidney Diseases	C0022658	group	Female Urogenital Diseases and Pregnancy Complications; Male Urogenital Diseases	Disease or Syndrome	1180	140	0.33	1	4	0	2003	2017
SPARC	6678	Leukemia, Myelocytic, Acute	C0023467	disease	Neoplasms	Neoplastic Process	3111	6892	0.33	1	4	0	2006	2015
SPARC	6678	Intervertebral Disc Degeneration	C0158266	disease	Musculoskeletal Diseases	Disease or Syndrome	342	47	0.33	1	3	0	2011	2018
SPARC	6678	Fibrosis, Liver	C0239946	disease	Pathological Conditions, Signs and Symptoms; Digestive System Diseases	Disease or Syndrome	1179	64	0.33	1	4	0	1997	2020
SPARC	6678	Multiple Myeloma	C0026764	disease	Neoplasms; Immune System Diseases; Hemic and Lymphatic Diseases; Cardiovascular Diseases	Neoplastic Process	1740	865	0.32	1	2	0	2003	2008
SPARC	6678	Thrombocytopenia	C0040034	phenotype	Hemic and Lymphatic Diseases	Disease or Syndrome	592	110	0.32	1	3	0	2005	2016
SPARC	6678	Colonic Neoplasms	C0009375	group	Digestive System Diseases; Neoplasms	Neoplastic Process	947	45	0.31	1	1	0	2007	2007
SPARC	6678	Myocardial Ischemia	C0151744	disease	Cardiovascular Diseases	Disease or Syndrome	756	103	0.31	1	2	0	2005	2018
SPARC	6678	Colorectal Neoplasms	C0009404	group	Digestive System Diseases; Neoplasms	Neoplastic Process	1296	609	0.3	1	1	0	2008	2008
SPARC	6678	Hepatitis	C0019158	group	Digestive System Diseases	Disease or Syndrome	656	42	0.3	1	1	0	2013	2013
SPARC	6678	Hyperalgesia	C0020429	phenotype	Pathological Conditions, Signs and Symptoms; Nervous System Diseases	Sign or Symptom	451	4	0.3	1	1	0	2011	2011
SPARC	6678	Liver Cirrhosis	C0023890	disease	Pathological Conditions, Signs and Symptoms; Digestive System Diseases	Disease or Syndrome	1182	189	0.3	1	1	0	2013	2013
SPARC	6678	Lobstein Disease	C0023931	disease	Congenital, Hereditary, and Neonatal Diseases and Abnormalities; Skin and Connective Tissue Diseases; Musculoskeletal Diseases	Disease or Syndrome	13	257	0.3	1	1	0	1991	1991
SPARC	6678	Low Back Pain	C0024031	phenotype	Pathological Conditions, Signs and Symptoms	Sign or Symptom	88	11	0.3	1	1	0	2011	2011
SPARC	6678	Acute Myeloid Leukemia, M1	C0026998	disease	Neoplasms	Neoplastic Process	138	0	0.3	1	1	0	2008	2008
SPARC	6678	Necrosis	C0027540	phenotype	Pathological Conditions, Signs and Symptoms	Organ or Tissue Function	60	0	0.3	1	1	0	2013	2013
SPARC	6678	Neoplasms, Experimental	C0027659	phenotype	Neoplasms	Neoplastic Process; Experimental Model of Disease	95	0	0.3	1	1	0	2010	2010
SPARC	6678	Uremia	C0041948	disease	Female Urogenital Diseases and Pregnancy Complications; Male Urogenital Diseases	Disease or Syndrome	110	2	0.3	1	1	0	2009	2009
SPARC	6678	Weight Gain	C0043094	phenotype	Pathological Conditions, Signs and Symptoms	Finding	124	12	0.3	1	1	0	2008	2008
SPARC	6678	Adrenocortical carcinoma	C0206686	disease	Neoplasms; Endocrine System Diseases	Neoplastic Process	281	46	0.3	1	1	0	2012	2012
SPARC	6678	Osteogenesis imperfecta type IV (disorder)	C0268363	disease		Disease or Syndrome; Congenital Abnormality	12	65	0.3	1	1	0	2015	2015
SPARC	6678	Low Back Pain, Mechanical	C0423682	disease	Pathological Conditions, Signs and Symptoms	Disease or Syndrome	3	0	0.3	1	1	0	2011	2011
SPARC	6678	Low Back Pain, Posterior Compartment	C0423689	phenotype	Pathological Conditions, Signs and Symptoms	Sign or Symptom	2	0	0.3	1	1	0	2011	2011
SPARC	6678	Allodynia	C0458247	phenotype	Pathological Conditions, Signs and Symptoms; Nervous System Diseases	Finding	84	0	0.3	1	1	0	2011	2011
SPARC	6678	Low Back Pain, Postural	C0577660	phenotype	Pathological Conditions, Signs and Symptoms	Sign or Symptom	2	0	0.3	1	1	0	2011	2011
SPARC	6678	Stomach Carcinoma	C0699791	disease	Digestive System Diseases; Neoplasms	Neoplastic Process	3720	652	0.3	1	13	0	2002	2019
SPARC	6678	Hyperalgesia, Primary	C0751211	phenotype	Pathological Conditions, Signs and Symptoms; Nervous System Diseases	Sign or Symptom	84	0	0.3	1	1	0	2011	2011
SPARC	6678	Hyperalgesia, Secondary	C0751212	phenotype	Pathological Conditions, Signs and Symptoms; Nervous System Diseases	Sign or Symptom	88	0	0.3	1	1	0	2011	2011
SPARC	6678	Tactile Allodynia	C0751213	phenotype	Pathological Conditions, Signs and Symptoms; Nervous System Diseases	Sign or Symptom	114	0	0.3	1	1	0	2011	2011
SPARC	6678	Hyperalgesia, Thermal	C0751214	phenotype	Pathological Conditions, Signs and Symptoms; Nervous System Diseases	Sign or Symptom	154	0	0.3	1	1	0	2011	2011
SPARC	6678	Recurrent Low Back Pain	C0751648	phenotype	Pathological Conditions, Signs and Symptoms	Sign or Symptom	2	0	0.3	1	1	0	2011	2011
SPARC	6678	Acute Myeloid Leukemia (AML-M2)	C1879321	disease	Neoplasms	Neoplastic Process	143	5	0.3	1	1	0	2008	2008
SPARC	6678	Degenerative Intervertebral Discs	C2717759	disease	Musculoskeletal Diseases	Anatomical Abnormality	23	0	0.3	1	1	0	2011	2011
SPARC	6678	Mechanical Allodynia	C2936719	phenotype	Pathological Conditions, Signs and Symptoms; Nervous System Diseases	Sign or Symptom	408	4	0.3	1	1	0	2011	2011
SPARC	6678	Diabetic Nephropathy	C0011881	disease	Female Urogenital Diseases and Pregnancy Complications; Male Urogenital Diseases; Endocrine System Diseases	Disease or Syndrome	1189	238	0.22	1	3	0	1995	2017
SPARC	6678	Myocardial Infarction	C0027051	disease	Pathological Conditions, Signs and Symptoms; Cardiovascular Diseases	Disease or Syndrome	1800	680	0.21	1	2	0	2004	2019
SPARC	6678	Endotoxemia	C0376618	phenotype	Pathological Conditions, Signs and Symptoms; Infections	Disease or Syndrome	401	5	0.21	1	1	0	2000	2000
SPARC	6678	Diabetic Angiopathies	C0011875	disease	Endocrine System Diseases; Cardiovascular Diseases	Disease or Syndrome	106	7	0.2	1	1	0	2000	2000
SPARC	6678	Glomerulonephritis, Membranoproliferative	C0017662	disease	Female Urogenital Diseases and Pregnancy Complications; Male Urogenital Diseases; Immune System Diseases	Disease or Syndrome	57	3	0.2	1	1	0	1996	1996
SPARC	6678	Membranous glomerulonephritis	C0017665	disease	Female Urogenital Diseases and Pregnancy Complications; Male Urogenital Diseases; Immune System Diseases	Disease or Syndrome	197	33	0.2	1	1	0	1996	1996
SPARC	6678	Osteoporosis	C0029456	disease	Nutritional and Metabolic Diseases; Musculoskeletal Diseases	Disease or Syndrome	1098	182	0.12	1	2	0	2008	2012
SPARC	6678	Body Height	C0005890	phenotype		Organism Attribute	1903	3972	0.1	1	1	1	2019	2019
SPARC	6678	Malignant neoplasm of breast	C0006142	disease	Neoplasms; Skin and Connective Tissue Diseases	Neoplastic Process	6941	3417	0.1	1	14	2	1998	2018
SPARC	6678	Malignant Neoplasms	C0006826	group	Neoplasms	Neoplastic Process	8621	1641	0.1	0.949	39	0	1996	2019
SPARC	6678	Dwarfism	C0013336	disease	Congenital, Hereditary, and Neonatal Diseases and Abnormalities; Musculoskeletal Diseases; Endocrine System Diseases	Congenital Abnormality	1261	77	0.1		0	1
SPARC	6678	Glioma	C0017638	disease	Neoplasms	Neoplastic Process	3097	353	0.1	1	16	0	2001	2019
SPARC	6678	Malignant neoplasm of stomach	C0024623	disease	Digestive System Diseases; Neoplasms	Neoplastic Process	3806	615	0.1	1	13	0	2002	2019
SPARC	6678	melanoma	C0025202	disease	Neoplasms	Neoplastic Process	3087	515	0.1	1	17	0	1997	2014
SPARC	6678	Muscle hypotonia	C0026827	phenotype	Pathological Conditions, Signs and Symptoms; Nervous System Diseases	Finding	967	579	0.1		0	0
SPARC	6678	Neoplasm Metastasis	C0027627	phenotype	Pathological Conditions, Signs and Symptoms; Neoplasms	Neoplastic Process	6385	327	0.1	0.949	39	0	2003	2019
SPARC	6678	Neoplasms	C0027651	group	Neoplasms	Neoplastic Process	10161	1644	0.1	0.969	127	0	1992	2019
SPARC	6678	Scoliosis, unspecified	C0036439	disease	Musculoskeletal Diseases	Disease or Syndrome	850	135	0.1		0	0
SPARC	6678	Muscle Weakness	C0151786	phenotype	Pathological Conditions, Signs and Symptoms; Musculoskeletal Diseases; Nervous System Diseases	Sign or Symptom	536	87	0.1		0	0
SPARC	6678	Tumor Progression	C0178874	phenotype	Pathological Conditions, Signs and Symptoms	Neoplastic Process	3865	72	0.1	0.9	20	0	1995	2020
SPARC	6678	Triglycerides measurement	C0202236	phenotype		Laboratory Procedure	563	1418	0.1	1	1	1	2008	2008
SPARC	6678	Pancreatic carcinoma	C0235974	disease	Digestive System Diseases; Neoplasms; Endocrine System Diseases	Neoplastic Process	2689	322	0.1	1	13	0	2005	2019
SPARC	6678	Compression fracture of vertebral column	C0262431	phenotype	Nutritional and Metabolic Diseases; Musculoskeletal Diseases; Wounds and Injuries	Pathologic Function	25	1	0.1		0	0
SPARC	6678	Malignant neoplasm of pancreas	C0346647	disease	Digestive System Diseases; Neoplasms; Endocrine System Diseases	Neoplastic Process	2667	277	0.1	0.929	14	0	2005	2019
SPARC	6678	Short stature	C0349588	phenotype		Finding	1127	292	0.1		0	0
SPARC	6678	Malignant neoplasm of prostate	C0376358	disease	Neoplasms; Male Urogenital Diseases	Neoplastic Process	4502	1082	0.1	1	16	0	2000	2020
SPARC	6678	Delayed speech and language development	C0454644	phenotype	Behavior and Behavior Mechanisms	Finding	560	192	0.1		0	0
SPARC	6678	Clumsiness - motor delay	C0520947	disease	Pathological Conditions, Signs and Symptoms; Nervous System Diseases; Mental Disorders; Behavior and Behavior Mechanisms	Disease or Syndrome	393	2	0.1		0	0
SPARC	6678	Carcinogenesis	C0596263	phenotype	Pathological Conditions, Signs and Symptoms; Neoplasms	Neoplastic Process	6243	355	0.1	0.96	25	0	1998	2019
SPARC	6678	Prostate carcinoma	C0600139	disease	Neoplasms; Male Urogenital Diseases	Neoplastic Process	4388	1168	0.1	1	15	0	2000	2020
SPARC	6678	Breast Carcinoma	C0678222	disease	Neoplasms; Skin and Connective Tissue Diseases	Neoplastic Process	6776	2793	0.1	1	13	2	1998	2018
SPARC	6678	Secondary malignant neoplasm of lymph node	C0686619	disease	Pathological Conditions, Signs and Symptoms; Neoplasms	Neoplastic Process	2825	188	0.1	0.917	12	0	2004	2019
SPARC	6678	Tumor Cell Invasion	C1269955	phenotype		Neoplastic Process	6626	169	0.1	1	45	0	1998	2020
SPARC	6678	Body mass index	C1305855	phenotype		Clinical Attribute	1014	2689	0.1	1	1	1	2019	2019
SPARC	6678	Primary malignant neoplasm	C1306459	group	Neoplasms	Neoplastic Process	8221	1374	0.1	0.944	36	0	1996	2019
SPARC	6678	Decreased muscle mass	C1837108	phenotype		Finding	65	12	0.1		0	0
SPARC	6678	Soft skin	C1844592	phenotype		Finding	22	3	0.1		0	0
SPARC	6678	Platyspondyly	C1844704	phenotype		Finding	93	3	0.1		0	0
SPARC	6678	Thin metacarpal cortices	C1850160	phenotype		Finding	2	0	0.1		0	0
SPARC	6678	Motor delay	C1854301	phenotype	Mental Disorders	Finding	384	34	0.1		0	0
SPARC	6678	Liver carcinoma	C2239176	disease	Digestive System Diseases; Neoplasms	Neoplastic Process	5725	942	0.1	1	11	4	1999	2019
SPARC	6678	Short Stature, CTCAE	C2919142	phenotype		Finding	1010	0	0.1		0	0
SPARC	6678	Obesity	C0028754	disease	Pathological Conditions, Signs and Symptoms; Nutritional and Metabolic Diseases	Disease or Syndrome	2821	1111	0.09	1	9	0	2001	2019
SPARC	6678	Malignant neoplasm of lung	C0242379	disease	Neoplasms; Respiratory Tract Diseases	Neoplastic Process	4173	1142	0.09	1	9	0	2003	2019
SPARC	6678	Non-Small Cell Lung Carcinoma	C0007131	disease	Neoplasms; Respiratory Tract Diseases	Neoplastic Process	3926	712	0.08	1	8	0	1998	2017
SPARC	6678	Neuroblastoma	C0027819	disease	Neoplasms	Neoplastic Process	2509	386	0.08	1	8	0	2004	2017
SPARC	6678	Carcinoma of lung	C0684249	disease	Neoplasms; Respiratory Tract Diseases	Neoplastic Process	4081	1204	0.08	1	8	0	2003	2019
SPARC	6678	Primary malignant neoplasm of lung	C1306460	disease	Neoplasms; Respiratory Tract Diseases	Neoplastic Process	3894	981	0.08	1	8	0	2003	2019
SPARC	6678	ANOPHTHALMIA AND PULMONARY HYPOPLASIA	C1832661	disease	Congenital, Hereditary, and Neonatal Diseases and Abnormalities; Eye Diseases; Respiratory Tract Diseases	Disease or Syndrome	1410	80	0.08	0.875	8	0	2005	2019
SPARC	6678	Carcinoma, Ovarian Epithelial	C4721610	disease	Neoplasms; Female Urogenital Diseases and Pregnancy Complications; Endocrine System Diseases	Neoplastic Process	2841	327	0.08	1	8	0	1999	2019
SPARC	6678	Central neuroblastoma	C0700095	disease	Neoplasms; Nervous System Diseases	Neoplastic Process	2419	231	0.07	1	7	0	2004	2017
SPARC	6678	Childhood Neuroblastoma	C4086165	disease	Neoplasms	Neoplastic Process	2420	231	0.07	1	7	0	2004	2017
SPARC	6678	Diabetes	C0011847	disease	Endocrine System Diseases	Disease or Syndrome	2359	710	0.06	1	6	0	2010	2019
SPARC	6678	Diabetes Mellitus	C0011849	group	Nutritional and Metabolic Diseases; Endocrine System Diseases	Disease or Syndrome	2803	824	0.06	1	6	0	2010	2019
SPARC	6678	Osteosarcoma	C0029463	disease	Neoplasms	Neoplastic Process	2283	178	0.06	0.833	6	0	1995	2019
SPARC	6678	Systemic Scleroderma	C0036421	disease	Skin and Connective Tissue Diseases	Disease or Syndrome	979	287	0.06	1	6	0	1991	2019
SPARC	6678	Osteosarcoma of bone	C0585442	disease	Neoplasms	Neoplastic Process	2247	151	0.06	0.833	6	0	1995	2019
SPARC	6678	Childhood Osteosarcoma	C1332986	disease	Neoplasms	Neoplastic Process	2208	151	0.06	0.833	6	0	1995	2019
SPARC	6678	Mammary Neoplasms	C1458155	group	Neoplasms; Skin and Connective Tissue Diseases	Neoplastic Process	2780	385	0.06	1	6	0	1997	2017
SPARC	6678	Glioblastoma Multiforme	C1621958	disease	Neoplasms	Neoplastic Process	3197	186	0.06	1	6	0	2005	2012
SPARC	6678	Malignant neoplasm of colon and/or rectum	C4722085	disease		Neoplastic Process	3669	502	0.06	1	6	0	1995	2019
SPARC	6678	Adenocarcinoma	C0001418	group	Neoplasms	Neoplastic Process	2235	168	0.05	1	5	0	2002	2017
SPARC	6678	Scleroderma	C0011644	disease	Skin and Connective Tissue Diseases	Disease or Syndrome	316	5	0.05	1	5	0	1991	2006
SPARC	6678	Glioblastoma	C0017636	disease	Neoplasms	Neoplastic Process	3177	281	0.05	1	5	0	2005	2019
SPARC	6678	Mandibulofacial Dysostosis	C0242387	disease	Congenital, Hereditary, and Neonatal Diseases and Abnormalities; Eye Diseases; Musculoskeletal Diseases	Disease or Syndrome	42	30	0.05	1	5	0	1993	1996
SPARC	6678	Squamous cell carcinoma of esophagus	C0279626	disease	Digestive System Diseases; Neoplasms	Neoplastic Process	2053	329	0.05	0.8	5	0	2006	2019
SPARC	6678	5q-syndrome	C0740302	disease	Pathological Conditions, Signs and Symptoms; Hemic and Lymphatic Diseases	Disease or Syndrome	45	1	0.05	1	5	0	2000	2014
SPARC	6678	Myelodysplastic Syndrome with Isolated del(5q)	C1292779	disease	Hemic and Lymphatic Diseases	Neoplastic Process	41	1	0.05	1	5	0	2000	2014
SPARC	6678	Pancreatic Ductal Adenocarcinoma	C1335302	disease	Digestive System Diseases; Neoplasms; Endocrine System Diseases	Neoplastic Process	970	22	0.05	1	5	0	2005	2019
SPARC	6678	Chromosome 5, trisomy 5q	C1802398	disease	Pathological Conditions, Signs and Symptoms; Congenital, Hereditary, and Neonatal Diseases and Abnormalities; Nervous System Diseases	Disease or Syndrome	42	1	0.05	1	5	0	2000	2014
SPARC	6678	MYELODYSPLASTIC SYNDROME	C3463824	group	Hemic and Lymphatic Diseases	Neoplastic Process	1033	95	0.05	1	5	0	2007	2015
SPARC	6678	Malignant neoplasm of urinary bladder	C0005684	disease	Neoplasms; Female Urogenital Diseases and Pregnancy Complications; Male Urogenital Diseases	Neoplastic Process	2113	316	0.04	1	4	0	2001	2019
SPARC	6678	Bladder Neoplasm	C0005695	disease	Neoplasms; Female Urogenital Diseases and Pregnancy Complications; Male Urogenital Diseases	Neoplastic Process	2130	281	0.04	1	4	0	2001	2019
SPARC	6678	Carcinoma	C0007097	group	Neoplasms	Neoplastic Process	2462	103	0.04	1	4	0	1988	2014
SPARC	6678	Diabetes Mellitus, Non-Insulin-Dependent	C0011860	disease	Nutritional and Metabolic Diseases; Endocrine System Diseases	Disease or Syndrome	3134	2672	0.04	1	4	0	2009	2018
SPARC	6678	Lung Neoplasms	C0024121	group	Neoplasms; Respiratory Tract Diseases	Neoplastic Process	1486	39	0.04	1	4	0	1998	2008
SPARC	6678	Medulloblastoma	C0025149	disease	Neoplasms	Neoplastic Process	862	115	0.04	1	4	0	2011	2014
SPARC	6678	Secondary malignant neoplasm of lung	C0153676	disease	Neoplasms; Respiratory Tract Diseases	Neoplastic Process	1370	20	0.04	1	4	0	2014	2017
SPARC	6678	Secondary malignant neoplasm of bone	C0153690	disease	Pathological Conditions, Signs and Symptoms; Neoplasms; Musculoskeletal Diseases	Neoplastic Process	647	18	0.04	1	4	0	2016	2018
SPARC	6678	Childhood Medulloblastoma	C0278510	disease	Neoplasms	Neoplastic Process	771	25	0.04	1	4	0	2011	2014
SPARC	6678	Adult Medulloblastoma	C0278876	disease	Neoplasms	Neoplastic Process	762	24	0.04	1	4	0	2011	2014
SPARC	6678	Colon Carcinoma	C0699790	disease	Digestive System Diseases; Neoplasms	Neoplastic Process	2832	275	0.04	1	4	0	2007	2019
SPARC	6678	Carcinoma of bladder	C0699885	disease	Neoplasms; Female Urogenital Diseases and Pregnancy Complications; Male Urogenital Diseases	Neoplastic Process	2104	309	0.04	1	4	0	2001	2019
SPARC	6678	Nasopharyngeal carcinoma	C2931822	disease	Neoplasms; Stomatognathic Diseases; Otorhinolaryngologic Diseases	Neoplastic Process	1553	320	0.04	1	4	0	2008	2019
SPARC	6678	Secondary Neoplasm	C2939419	group	Pathological Conditions, Signs and Symptoms; Neoplasms	Neoplastic Process	2492	85	0.04	1	4	0	2009	2017
SPARC	6678	Astrocytoma	C0004114	disease	Neoplasms	Neoplastic Process	985	59	0.03	1	3	0	2000	2013
SPARC	6678	Brain Neoplasms	C0006118	group	Neoplasms; Nervous System Diseases	Neoplastic Process	1018	204	0.03	1	3	0	1998	2008
SPARC	6678	Glaucoma	C0017601	disease	Eye Diseases	Disease or Syndrome	770	198	0.03	1	3	0	2010	2018
SPARC	6678	Pulmonary Fibrosis	C0034069	disease	Respiratory Tract Diseases	Disease or Syndrome	924	25	0.03	1	3	0	2002	2017
SPARC	6678	Adult Glioblastoma	C0278878	disease	Neoplasms	Neoplastic Process	2528	98	0.03	1	3	0	2005	2010
SPARC	6678	Childhood Glioblastoma	C0280474	disease	Neoplasms	Neoplastic Process	2527	98	0.03	1	3	0	2005	2010
SPARC	6678	Glaucoma, Primary Open Angle	C0339573	disease	Eye Diseases	Disease or Syndrome	383	222	0.03	1	3	0	2008	2019
SPARC	6678	Idiopathic Pulmonary Fibrosis	C1800706	disease	Respiratory Tract Diseases	Disease or Syndrome	803	63	0.03	1	3	0	2003	2017
SPARC	6678	Childhood Myelodysplastic Syndrome	C2347761	disease	Hemic and Lymphatic Diseases	Neoplastic Process	335	20	0.03	1	3	0	2014	2015
SPARC	6678	Adult Myelodysplastic Syndrome	C3900098	disease	Hemic and Lymphatic Diseases	Neoplastic Process	332	20	0.03	1	3	0	2014	2015
SPARC	6678	Alzheimer's Disease	C0002395	disease	Nervous System Diseases; Mental Disorders	Disease or Syndrome	3397	1843	0.02	1	2	0	2019	2019
SPARC	6678	Ameloblastoma	C0002448	disease	Neoplasms	Neoplastic Process	174	4	0.02	1	2	0	2010	2019
SPARC	6678	Rheumatoid Arthritis	C0003873	disease	Skin and Connective Tissue Diseases; Musculoskeletal Diseases; Immune System Diseases	Disease or Syndrome	2723	2387	0.02	1	2	0	2015	2019
SPARC	6678	Back Pain	C0004604	phenotype	Pathological Conditions, Signs and Symptoms	Sign or Symptom	110	10	0.02	1	2	0	2011	2011
SPARC	6678	Bone neoplasms	C0005967	group	Neoplasms; Musculoskeletal Diseases	Neoplastic Process	151	4	0.02	1	2	0	1992	2018
SPARC	6678	Renal Cell Carcinoma	C0007134	disease	Neoplasms; Female Urogenital Diseases and Pregnancy Complications; Male Urogenital Diseases	Neoplastic Process	2084	288	0.02	1	2	0	2001	2012
SPARC	6678	Squamous cell carcinoma	C0007137	disease	Neoplasms	Neoplastic Process	2507	257	0.02	1	2	0	2015	2019
SPARC	6678	Diabetic Retinopathy	C0011884	disease	Eye Diseases; Endocrine System Diseases; Cardiovascular Diseases	Disease or Syndrome	645	213	0.02	1	2	0	2010	2019
SPARC	6678	Diarrhea	C0011991	phenotype	Pathological Conditions, Signs and Symptoms	Sign or Symptom	632	63	0.02	1	2	0	2003	2017
SPARC	6678	Angle Closure Glaucoma	C0017605	disease	Eye Diseases	Disease or Syndrome	94	56	0.02	1	2	0	2008	2019
SPARC	6678	Primary angle-closure glaucoma	C0017606	disease	Eye Diseases	Disease or Syndrome	87	55	0.02	1	2	0	2008	2019
SPARC	6678	Herpes Simplex Infections	C0019348	group	Infections; Skin and Connective Tissue Diseases	Disease or Syndrome	645	11	0.02	1	2	0	2006	2016
SPARC	6678	Myeloid Leukemia, Chronic	C0023473	disease	Neoplasms; Hemic and Lymphatic Diseases	Neoplastic Process	1172	115	0.02	1	2	0	2010	2013
SPARC	6678	Meningioma	C0025286	disease	Neoplasms; Nervous System Diseases	Neoplastic Process	634	43	0.02	1	2	0	2006	2010
SPARC	6678	Pancreatic Neoplasm	C0030297	disease	Digestive System Diseases; Neoplasms; Endocrine System Diseases	Neoplastic Process	764	20	0.02	1	2	0	2007	2017
SPARC	6678	Polycystic Ovary Syndrome	C0032460	disease	Neoplasms; Female Urogenital Diseases and Pregnancy Complications; Endocrine System Diseases	Disease or Syndrome	988	363	0.02	1	2	0	2012	2013
SPARC	6678	Prostatic Neoplasms	C0033578	group	Neoplasms; Male Urogenital Diseases	Neoplastic Process	1722	31	0.02	1	2	0	2007	2016
SPARC	6678	Cataract	C0086543	disease	Eye Diseases	Acquired Abnormality	878	124	0.02	1	2	0	1999	2018
SPARC	6678	Undifferentiated carcinoma	C0205698	disease	Neoplasms	Neoplastic Process	283	8	0.02	1	2	0	2000	2002
SPARC	6678	Carcinomatosis	C0205699	phenotype	Neoplasms	Neoplastic Process	186	2	0.02	1	2	0	2007	2008
SPARC	6678	Gastric Adenocarcinoma	C0278701	disease	Digestive System Diseases; Neoplasms	Neoplastic Process	453	235	0.02	1	2	0	2013	2017
SPARC	6678	Adult Meningioma	C0278877	disease	Neoplasms; Nervous System Diseases	Neoplastic Process	405	30	0.02	1	2	0	2006	2010
SPARC	6678	Malignant Head and Neck Neoplasm	C0278996	disease	Neoplasms	Neoplastic Process	767	118	0.02	1	2	0	2017	2018
SPARC	6678	Conventional (Clear Cell) Renal Cell Carcinoma	C0279702	disease	Neoplasms; Female Urogenital Diseases and Pregnancy Complications; Male Urogenital Diseases	Neoplastic Process	2346	222	0.02	1	2	0	2001	2012
SPARC	6678	Solid Neoplasm	C0280100	phenotype	Neoplasms	Neoplastic Process	1145	24	0.02	1	2	0	2017	2019
SPARC	6678	Adenocarcinoma of pancreas	C0281361	disease	Digestive System Diseases; Neoplasms; Endocrine System Diseases	Neoplastic Process	518	138	0.02	1	2	0	2010	2018
SPARC	6678	Secondary malignant neoplasm of pancreas	C0346976	disease	Digestive System Diseases; Neoplasms; Endocrine System Diseases	Neoplastic Process	69	4	0.02	0.5	2	0	2015	2017
SPARC	6678	Non-alcoholic Fatty Liver Disease	C0400966	disease	Digestive System Diseases	Disease or Syndrome	1058	222	0.02	1	2	0	2018	2019
SPARC	6678	Chronic low back pain	C0457949	disease	Pathological Conditions, Signs and Symptoms	Disease or Syndrome	43	3	0.02	1	2	0	2011	2018
SPARC	6678	Endometrial Carcinoma	C0476089	disease	Neoplasms; Female Urogenital Diseases and Pregnancy Complications	Neoplastic Process	1597	326	0.02	1	2	0	2007	2014
SPARC	6678	Metastatic Prostate Carcinoma	C0936223	disease	Neoplasms; Male Urogenital Diseases	Neoplastic Process	362	24	0.02	1	2	0	2003	2016
SPARC	6678	Metastasis from malignant tumor of prostate	C1282496	disease		Neoplastic Process	342	18	0.02	1	2	0	2003	2016
SPARC	6678	Tumor Angiogenesis	C1519670	phenotype	Pathological Conditions, Signs and Symptoms	Neoplastic Process	822	5	0.02	1	2	0	2010	2016
SPARC	6678	Malignant transformation	C1608408	phenotype		Neoplastic Process	1027	20	0.02	1	2	0	2001	2004
SPARC	6678	Meningioma, benign, no ICD-O subtype	C1762616	disease	Neoplasms; Nervous System Diseases	Neoplastic Process	404	30	0.02	1	2	0	2006	2010
SPARC	6678	Coronary Artery Disease	C1956346	disease	Cardiovascular Diseases	Disease or Syndrome	1708	1577	0.02	1	2	0	2001	2017
SPARC	6678	Head and Neck Carcinoma	C3887461	disease	Neoplasms	Neoplastic Process	786	118	0.02	1	2	0	2017	2018
SPARC	6678	Primary Myelofibrosis	C0001815	disease	Hemic and Lymphatic Diseases	Neoplastic Process	282	29	0.01	1	1	0	2012	2012
SPARC	6678	Alveolar Bone Loss	C0002382	disease	Musculoskeletal Diseases; Stomatognathic Diseases	Disease or Syndrome	101	0	0.01	1	1	0	2007	2007
SPARC	6678	Aplastic Anemia	C0002874	disease	Hemic and Lymphatic Diseases	Disease or Syndrome	238	30	0.01	1	1	0	2015	2015
SPARC	6678	Anthracosis	C0003165	disease	Respiratory Tract Diseases	Disease or Syndrome	65	37	0.01	1	1	3	2014	2014
SPARC	6678	Arteriosclerosis	C0003850	disease	Cardiovascular Diseases	Disease or Syndrome	2006	267	0.01	1	1	0	1993	1993
SPARC	6678	Asthma	C0004096	disease	Respiratory Tract Diseases; Immune System Diseases	Disease or Syndrome	2096	1536	0.01	1	1	0	2017	2017
SPARC	6678	Atherosclerosis	C0004153	disease	Cardiovascular Diseases	Disease or Syndrome	2044	281	0.01	1	1	0	1993	1993
SPARC	6678	Autoimmune Diseases	C0004364	group	Immune System Diseases	Disease or Syndrome	1758	428	0.01	1	1	0	2011	2011
SPARC	6678	Barrett Esophagus	C0004763	disease	Digestive System Diseases; Neoplasms	Disease or Syndrome	478	60	0.01	1	1	0	2003	2003
SPARC	6678	Bone Diseases	C0005940	group	Musculoskeletal Diseases	Disease or Syndrome	317	10	0.01	1	1	0	2007	2007
SPARC	6678	Malignant neoplasm of endometrium	C0007103	disease	Neoplasms; Female Urogenital Diseases and Pregnancy Complications	Neoplastic Process	1235	197	0.01	1	1	0	2014	2014
SPARC	6678	Rectal Carcinoma	C0007113	disease	Digestive System Diseases; Neoplasms	Neoplastic Process	472	112	0.01	1	1	0	2017	2017
SPARC	6678	Malignant neoplasm of skin	C0007114	disease	Neoplasms; Skin and Connective Tissue Diseases	Neoplastic Process	508	38	0.01	1	1	0	2014	2014
SPARC	6678	Noninfiltrating Intraductal Carcinoma	C0007124	disease	Neoplasms	Neoplastic Process	486	13	0.01	1	1	0	2018	2018
SPARC	6678	Malignant tumor of cervix	C0007847	disease	Neoplasms; Female Urogenital Diseases and Pregnancy Complications	Neoplastic Process	1718	245	0.01	1	1	0	2012	2012
SPARC	6678	Charcot-Marie-Tooth Disease	C0007959	disease	Congenital, Hereditary, and Neonatal Diseases and Abnormalities; Nervous System Diseases	Disease or Syndrome	208	136	0.01	1	1	0	2009	2009
SPARC	6678	Colitis	C0009319	disease	Digestive System Diseases	Disease or Syndrome	1135	15	0.01	1	1	0	2018	2018
SPARC	6678	Febrile Convulsions	C0009952	disease	Pathological Conditions, Signs and Symptoms; Nervous System Diseases	Disease or Syndrome	192	65	0.01	1	1	0	2019	2019
SPARC	6678	Corneal dystrophy	C0010036	disease	Congenital, Hereditary, and Neonatal Diseases and Abnormalities; Eye Diseases	Disease or Syndrome	113	25	0.01	1	1	0	1996	1996
SPARC	6678	Coronary Arteriosclerosis	C0010054	disease	Cardiovascular Diseases	Disease or Syndrome	1282	440	0.01	1	1	0	2001	2001
SPARC	6678	Coronary heart disease	C0010068	disease	Cardiovascular Diseases	Disease or Syndrome	1576	1178	0.01	1	1	0	2001	2001
SPARC	6678	Coxsackievirus Infections	C0010246	group	Infections	Disease or Syndrome	48	1	0.01	1	1	0	2019	2019
SPARC	6678	Craniosynostosis	C0010278	disease	Congenital, Hereditary, and Neonatal Diseases and Abnormalities; Musculoskeletal Diseases	Disease or Syndrome	488	90	0.01	1	1	0	2019	2019
SPARC	6678	Phyllodes Tumor	C0010701	disease	Neoplasms	Neoplastic Process	100	1	0.01	1	1	0	2017	2017
SPARC	6678	Diabetes Mellitus, Insulin-Dependent	C0011854	disease	Nutritional and Metabolic Diseases; Immune System Diseases; Endocrine System Diseases	Disease or Syndrome	1675	954	0.01	1	1	0	2018	2018
SPARC	6678	Patent ductus arteriosus	C0013274	disease	Congenital, Hereditary, and Neonatal Diseases and Abnormalities; Cardiovascular Diseases	Congenital Abnormality	510	56	0.01	1	1	0	2017	2017
SPARC	6678	Encephalomyelitis	C0014070	disease	Infections; Nervous System Diseases	Disease or Syndrome	865	7	0.01	1	1	0	2011	2011
SPARC	6678	Enteritis	C0014335	disease	Digestive System Diseases	Disease or Syndrome	85	2	0.01	1	1	0	2004	2004
SPARC	6678	Fatigue	C0015672	phenotype	Pathological Conditions, Signs and Symptoms	Sign or Symptom	760	67	0.01	1	1	0	2017	2017
SPARC	6678	Fibrosis	C0016059	phenotype	Pathological Conditions, Signs and Symptoms	Pathologic Function	184	0	0.01	1	1	0	2003	2003
SPARC	6678	Fragile X Syndrome	C0016667	disease	Congenital, Hereditary, and Neonatal Diseases and Abnormalities; Nervous System Diseases	Disease or Syndrome	194	11	0.01	1	1	0	2017	2017
SPARC	6678	Gastroesophageal reflux disease	C0017168	disease	Digestive System Diseases	Disease or Syndrome	446	52	0.01	1	1	0	2003	2003
SPARC	6678	Gingival Hypertrophy	C0017567	disease	Stomatognathic Diseases	Disease or Syndrome	7	0	0.01	1	1	0	2007	2007
SPARC	6678	Groenouw's Dystrophies	C0018245	disease	Congenital, Hereditary, and Neonatal Diseases and Abnormalities; Eye Diseases	Disease or Syndrome	3	0	0.01	1	1	0	1996	1996
SPARC	6678	Heart Diseases	C0018799	group	Cardiovascular Diseases	Disease or Syndrome	537	45	0.01	1	1	0	2016	2016
SPARC	6678	Heart failure	C0018801	disease	Cardiovascular Diseases	Disease or Syndrome	1499	201	0.01	1	1	0	2019	2019
SPARC	6678	Congestive heart failure	C0018802	disease	Cardiovascular Diseases	Disease or Syndrome	1760	165	0.01	1	1	0	2019	2019
SPARC	6678	Hemolytic-Uremic Syndrome	C0019061	disease	Female Urogenital Diseases and Pregnancy Complications; Male Urogenital Diseases; Hemic and Lymphatic Diseases	Disease or Syndrome	110	7	0.01	1	1	0	1994	1994
SPARC	6678	Hyperglycemia	C0020456	disease	Nutritional and Metabolic Diseases	Disease or Syndrome	1098	108	0.01	1	1	0	2009	2009
SPARC	6678	Hypertensive disease	C0020538	group	Cardiovascular Diseases	Disease or Syndrome	2322	1085	0.01	1	1	0	2007	2007
SPARC	6678	leukemia	C0023418	disease	Neoplasms	Neoplastic Process	2111	144	0.01	1	1	0	2013	2013
SPARC	6678	Acute monocytic leukemia	C0023465	disease	Neoplasms	Neoplastic Process	633	22	0.01	1	1	0	2006	2006
SPARC	6678	Liver neoplasms	C0023903	group	Digestive System Diseases; Neoplasms	Neoplastic Process	1424	7	0.01	1	1	0	1999	1999
SPARC	6678	Chronic Obstructive Airway Disease	C0024117	disease	Respiratory Tract Diseases	Disease or Syndrome	1428	852	0.01	1	1	0	2017	2017
SPARC	6678	Myopathy	C0026848	group	Musculoskeletal Diseases; Nervous System Diseases	Disease or Syndrome	634	166	0.01	1	1	0	2017	2017
SPARC	6678	Myelofibrosis	C0026987	disease	Pathological Conditions, Signs and Symptoms; Neoplasms; Hemic and Lymphatic Diseases	Neoplastic Process	163	7	0.01	1	1	0	2012	2012
SPARC	6678	Myeloproliferative disease	C0027022	group	Hemic and Lymphatic Diseases	Neoplastic Process	365	43	0.01	1	1	0	2012	2012
SPARC	6678	Myocarditis	C0027059	disease	Cardiovascular Diseases	Disease or Syndrome	285	2	0.01	1	1	0	2018	2018
SPARC	6678	Neoplasms, Vascular Tissue	C0027668	group	Neoplasms	Neoplastic Process	67	1	0.01	1	1	0	2018	2018
SPARC	6678	Melanocytic nevus	C0027962	disease	Neoplasms	Neoplastic Process	297	33	0.01	1	1	0	1997	1997
SPARC	6678	Nose Diseases	C0028432	group	Respiratory Tract Diseases; Otorhinolaryngologic Diseases	Disease or Syndrome	14	0	0.01	1	1	0	2015	2015
SPARC	6678	Obsessive-Compulsive Disorder	C0028768	disease	Mental Disorders	Mental or Behavioral Dysfunction	175	112	0.01	1	1	0	2019	2019
SPARC	6678	Ovarian Carcinoma	C0029925	disease	Neoplasms; Female Urogenital Diseases and Pregnancy Complications; Endocrine System Diseases	Neoplastic Process	539	19	0.01	1	1	0	1999	1999
SPARC	6678	Pterygium	C0033999	disease	Eye Diseases	Disease or Syndrome	216	5	0.01	1	1	0	2012	2012
SPARC	6678	Raynaud Phenomenon	C0034735	disease	Cardiovascular Diseases	Disease or Syndrome	63	1	0.01	1	1	0	2002	2002
SPARC	6678	Retinal Diseases	C0035309	group	Eye Diseases	Disease or Syndrome	714	56	0.01	1	1	0	2007	2007
SPARC	6678	Schistosomiasis	C0036323	disease	Infections	Disease or Syndrome	152	4	0.01	1	1	0	1995	1995
SPARC	6678	Schizophrenia	C0036341	disease	Mental Disorders	Mental or Behavioral Dysfunction	2872	2897	0.01	1	1	0	2019	2019
SPARC	6678	Localized scleroderma	C0036420	disease	Skin and Connective Tissue Diseases	Disease or Syndrome	51	0	0.01	1	1	0	1991	1991
SPARC	6678	Ankylosing spondylitis	C0038013	disease	Musculoskeletal Diseases	Disease or Syndrome	710	609	0.01	1	1	0	2011	2011
SPARC	6678	Virus Diseases	C0042769	group	Infections	Disease or Syndrome	1471	42	0.01	1	1	0	2012	2012
SPARC	6678	Lentivirus Infections	C0079680	group	Infections	Disease or Syndrome	88	0	0.01	1	1	0	2019	2019
SPARC	6678	B-Cell Lymphomas	C0079731	group	Neoplasms; Immune System Diseases; Hemic and Lymphatic Diseases	Neoplastic Process	1408	42	0.01	1	1	0	2019	2019
SPARC	6678	Diffuse Large B-Cell Lymphoma	C0079744	disease	Neoplasms; Immune System Diseases; Hemic and Lymphatic Diseases	Neoplastic Process	1043	127	0.01	1	1	0	2017	2017
SPARC	6678	T-Cell Lymphoma	C0079772	disease	Neoplasms; Immune System Diseases; Hemic and Lymphatic Diseases	Neoplastic Process	485	24	0.01	1	1	0	2018	2018
SPARC	6678	Severe Combined Immunodeficiency	C0085110	disease	Congenital, Hereditary, and Neonatal Diseases and Abnormalities; Nutritional and Metabolic Diseases; Immune System Diseases	Disease or Syndrome	284	46	0.01	1	1	0	2011	2011
SPARC	6678	Gestational Diabetes	C0085207	phenotype	Nutritional and Metabolic Diseases; Female Urogenital Diseases and Pregnancy Complications; Endocrine System Diseases	Disease or Syndrome	649	224	0.01	0	1	0	2013	2013
SPARC	6678	Polycystic Kidney, Autosomal Dominant	C0085413	disease	Congenital, Hereditary, and Neonatal Diseases and Abnormalities; Female Urogenital Diseases and Pregnancy Complications; Male Urogenital Diseases	Disease or Syndrome	280	35	0.01	1	1	0	2006	2006
SPARC	6678	Rous Sarcoma	C0086942	disease	Neoplasms; Infections; Animal Diseases	Neoplastic Process; Experimental Model of Disease	60	0	0.01	1	1	0	1986	1986
SPARC	6678	Chronic sinusitis	C0149516	disease	Infections; Respiratory Tract Diseases; Otorhinolaryngologic Diseases	Disease or Syndrome	205	6	0.01	1	1	0	2019	2019
SPARC	6678	Pancreatitis, Chronic	C0149521	disease	Digestive System Diseases	Disease or Syndrome	379	56	0.01	1	1	0	2005	2005
SPARC	6678	Squamous cell carcinoma of lung	C0149782	disease	Neoplasms; Respiratory Tract Diseases	Neoplastic Process	670	283	0.01	1	1	0	2019	2019
SPARC	6678	Adenocarcinoma of lung (disorder)	C0152013	disease	Neoplasms	Neoplastic Process	2438	563	0.01	1	1	0	2019	2019
SPARC	6678	Bone Cysts, Aneurysmal	C0152244	disease	Neoplasms; Musculoskeletal Diseases	Disease or Syndrome	79	5	0.01	0	1	0	2018	2018
SPARC	6678	Nodular Sclerosis Classical Hodgkin Lymphoma	C0152268	disease	Neoplasms; Immune System Diseases; Hemic and Lymphatic Diseases	Neoplastic Process	66	22	0.01	1	1	0	2009	2009
SPARC	6678	Hypopharyngeal Cancer	C0153398	disease	Neoplasms; Stomatognathic Diseases; Otorhinolaryngologic Diseases	Neoplastic Process	50	1	0.01	1	1	0	2018	2018
SPARC	6678	Conjunctival scar	C0155164	disease	Pathological Conditions, Signs and Symptoms; Eye Diseases	Acquired Abnormality	14	0	0.01	1	1	0	2018	2018
SPARC	6678	Intervertebral disc disorder	C0158252	group	Pathological Conditions, Signs and Symptoms; Musculoskeletal Diseases	Disease or Syndrome	188	19	0.01	1	1	0	2018	2018
SPARC	6678	Idiopathic osteoporosis	C0158447	disease	Nutritional and Metabolic Diseases; Musculoskeletal Diseases	Disease or Syndrome	10	0	0.01	1	1	0	2008	2008
SPARC	6678	Cleft palate with cleft lip	C0158646	disease	Congenital, Hereditary, and Neonatal Diseases and Abnormalities; Musculoskeletal Diseases; Stomatognathic Diseases	Congenital Abnormality	119	43	0.01	1	1	0	2019	2019
SPARC	6678	Anaplastic carcinoma	C0205696	disease	Neoplasms	Neoplastic Process	232	3	0.01	1	1	0	2002	2002
SPARC	6678	Neuroectodermal Tumor, Primitive	C0206663	disease	Neoplasms	Neoplastic Process	184	6	0.01	1	1	0	2010	2010
SPARC	6678	Carcinoma, Endometrioid	C0206687	disease	Neoplasms; Female Urogenital Diseases and Pregnancy Complications; Endocrine System Diseases	Neoplastic Process	223	12	0.01	1	1	0	2014	2014
SPARC	6678	Mucoepidermoid Carcinoma	C0206694	disease	Neoplasms	Neoplastic Process	153	6	0.01	1	1	0	2019	2019
SPARC	6678	Cystadenocarcinoma, Serous	C0206701	disease	Neoplasms	Neoplastic Process	110	1	0.01	1	1	0	2014	2014
SPARC	6678	Angiofibroma	C0206731	disease	Neoplasms	Neoplastic Process	45	1	0.01	1	1	0	2008	2008
SPARC	6678	Gastrointestinal Carcinoid Tumor	C0220620	disease	Digestive System Diseases; Neoplasms; Endocrine System Diseases	Neoplastic Process	323	13	0.01	1	1	0	2004	2004
SPARC	6678	Uveal melanoma	C0220633	disease	Neoplasms; Eye Diseases	Neoplastic Process	376	22	0.01	1	1	0	2009	2009
SPARC	6678	Diastrophic dysplasia	C0220726	disease	Congenital, Hereditary, and Neonatal Diseases and Abnormalities; Musculoskeletal Diseases; Endocrine System Diseases	Disease or Syndrome	56	63	0.01	1	1	0	1991	1991
SPARC	6678	Papillary thyroid carcinoma	C0238463	disease	Neoplasms; Endocrine System Diseases	Neoplastic Process	1348	204	0.01	1	1	0	2019	2019
SPARC	6678	Dyslipidemias	C0242339	group	Nutritional and Metabolic Diseases	Disease or Syndrome	471	184	0.01	1	1	0	2013	2013
SPARC	6678	Indian childhood cirrhosis	C0268074	disease	Pathological Conditions, Signs and Symptoms; Digestive System Diseases; Respiratory Tract Diseases	Disease or Syndrome	67	6	0.01	1	1	0	2006	2006
SPARC	6678	Classical galactosemia	C0268151	disease	Congenital, Hereditary, and Neonatal Diseases and Abnormalities; Nutritional and Metabolic Diseases; Nervous System Diseases	Disease or Syndrome	32	233	0.01	1	1	0	2010	2010
SPARC	6678	Simple renal cyst	C0268800	disease	Pathological Conditions, Signs and Symptoms; Congenital, Hereditary, and Neonatal Diseases and Abnormalities; Neoplasms; Female Urogenital Diseases and Pregnancy Complications; Male Urogenital Diseases	Disease or Syndrome	100	2	0.01	1	1	0	2006	2006
SPARC	6678	Viral myocarditis	C0276138	disease	Infections; Cardiovascular Diseases	Disease or Syndrome	129	2	0.01	1	1	0	2018	2018
SPARC	6678	Radicular pain	C0278147	phenotype	Pathological Conditions, Signs and Symptoms	Sign or Symptom	23	5	0.01	1	1	0	2011	2011
SPARC	6678	Carcinoma breast stage IV	C0278488	disease		Neoplastic Process	573	14	0.01	1	1	0	2017	2017
SPARC	6678	Extramedullary Plasmacytoma	C0278619	disease	Neoplasms; Immune System Diseases	Neoplastic Process	15	0	0.01	1	1	0	2003	2003
SPARC	6678	Bladder cancer recurrent	C0278827	disease	Neoplasms; Female Urogenital Diseases and Pregnancy Complications; Male Urogenital Diseases	Neoplastic Process	7	0	0.01	1	1	0	2019	2019
SPARC	6678	Metastatic melanoma	C0278883	disease	Neoplasms	Neoplastic Process	504	42	0.01	1	1	0	2014	2014
SPARC	6678	Small cell osteosarcoma	C0279622	disease	Neoplasms	Neoplastic Process	13	0	0.01	1	1	0	1992	1992
SPARC	6678	Adenocarcinoma Of Esophagus	C0279628	disease	Digestive System Diseases; Neoplasms	Neoplastic Process	468	81	0.01	1	1	0	2003	2003
SPARC	6678	stage, ovarian epithelial cancer	C0280220	disease		Neoplastic Process	65	0	0.01	1	1	0	2019	2019
SPARC	6678	Squamous cell carcinoma of oropharynx	C0280313	disease	Neoplasms; Stomatognathic Diseases; Otorhinolaryngologic Diseases	Neoplastic Process	155	33	0.01	1	1	0	2016	2016
SPARC	6678	Vascular Neoplasms	C0282607	group	Neoplasms; Cardiovascular Diseases	Neoplastic Process	15	0	0.01	1	1	0	2018	2018
SPARC	6678	Cervix carcinoma	C0302592	disease	Neoplasms; Female Urogenital Diseases and Pregnancy Complications	Neoplastic Process	1881	283	0.01	1	1	0	2012	2012
SPARC	6678	Superficial ulcer	C0333307	disease	Pathological Conditions, Signs and Symptoms	Acquired Abnormality	242	10	0.01	0	1	0	2015	2015
SPARC	6678	Tumor necrosis	C0333516	phenotype	Pathological Conditions, Signs and Symptoms	Neoplastic Process	350	1	0.01	1	1	0	2009	2009
SPARC	6678	Epiretinal Membrane	C0339543	disease	Eye Diseases	Acquired Abnormality	102	0	0.01	1	1	0	2002	2002
SPARC	6678	Complications of Diabetes Mellitus	C0342257	group	Endocrine System Diseases	Disease or Syndrome	240	35	0.01	1	1	0	2010	2010
SPARC	6678	Human papilloma virus infection	C0343641	disease	Infections	Disease or Syndrome	429	42	0.01	1	1	0	2016	2016
SPARC	6678	Intrahepatic Cholangiocarcinoma	C0345905	disease	Neoplasms	Neoplastic Process	470	19	0.01	1	1	0	2006	2006
SPARC	6678	Pseudoachondroplasia	C0410538	disease	Congenital, Hereditary, and Neonatal Diseases and Abnormalities; Musculoskeletal Diseases	Congenital Abnormality	19	16	0.01	1	1	0	2007	2007
SPARC	6678	Developmental delay (disorder)	C0424605	phenotype	Mental Disorders	Mental or Behavioral Dysfunction	584	68	0.01	1	1	0	2011	2011
SPARC	6678	Secondary malignant neoplasm of liver	C0494165	disease	Digestive System Diseases; Neoplasms	Neoplastic Process	951	34	0.01	1	1	0	1995	1995
SPARC	6678	Bilateral cataracts (disorder)	C0521707	disease	Eye Diseases	Disease or Syndrome	166	37	0.01	1	1	0	1999	1999
SPARC	6678	Neurodegenerative Disorders	C0524851	group	Nervous System Diseases	Disease or Syndrome	1515	85	0.01	1	1	0	2019	2019
SPARC	6678	Thyroid carcinoma	C0549473	disease	Neoplasms; Endocrine System Diseases	Neoplastic Process	1175	145	0.01	1	1	0	2002	2002
SPARC	6678	Malignant Glioma	C0555198	disease	Neoplasms	Neoplastic Process	724	22	0.01	1	1	0	2009	2009
SPARC	6678	Global developmental delay	C0557874	disease		Mental or Behavioral Dysfunction	1825	553	0.01	1	1	0	2011	2011
SPARC	6678	Intraocular pressure disorder	C0595921	disease	Eye Diseases	Disease or Syndrome	304	56	0.01	1	1	0	2014	2014
SPARC	6678	Chemical Carcinogenesis	C0596321	phenotype	Pathological Conditions, Signs and Symptoms; Neoplasms	Neoplastic Process	71	2	0.01	1	1	0	2013	2013
SPARC	6678	Tumor Initiation	C0598935	phenotype	Pathological Conditions, Signs and Symptoms; Neoplasms	Neoplastic Process	533	8	0.01	1	1	0	2008	2008
SPARC	6678	Waardenburg Anophthalmia Syndrome	C0599973	disease	Congenital, Hereditary, and Neonatal Diseases and Abnormalities	Disease or Syndrome	8	10	0.01	1	1	0	2011	2011
SPARC	6678	Epithelial ovarian cancer	C0677886	disease	Neoplasms; Female Urogenital Diseases and Pregnancy Complications; Endocrine System Diseases	Neoplastic Process	1224	129	0.01	1	1	0	1999	1999
SPARC	6678	Malignant neoplasm of gastrointestinal tract	C0685938	disease	Digestive System Diseases; Neoplasms	Neoplastic Process	423	55	0.01	1	1	0	2013	2013
SPARC	6678	Middle Cerebral Artery Occlusion	C0740391	disease	Pathological Conditions, Signs and Symptoms; Nervous System Diseases; Cardiovascular Diseases	Acquired Abnormality	626	0	0.01	1	1	0	2018	2018
SPARC	6678	Chronic back pain	C0740418	phenotype	Pathological Conditions, Signs and Symptoms	Sign or Symptom	10	0	0.01	1	1	0	2011	2011
SPARC	6678	Biliary carcinoma	C0740476	disease		Neoplastic Process	1	0	0.01	1	1	0	2017	2017
SPARC	6678	Brunner Syndrome	C0796275	disease	Pathological Conditions, Signs and Symptoms; Congenital, Hereditary, and Neonatal Diseases and Abnormalities; Nervous System Diseases; Mental Disorders; Behavior and Behavior Mechanisms	Disease or Syndrome	3	5	0.01	1	1	0	2019	2019
SPARC	6678	Pancreatic carcinoma resectable	C0854778	disease	Digestive System Diseases; Neoplasms; Endocrine System Diseases	Neoplastic Process	35	0	0.01	1	1	0	2010	2010
SPARC	6678	Cardiomyopathies	C0878544	group	Cardiovascular Diseases	Disease or Syndrome	925	294	0.01	1	1	0	2018	2018
SPARC	6678	Stromal Neoplasm	C0879615	disease	Neoplasms	Neoplastic Process	86	1	0.01	1	1	0	2011	2011
SPARC	6678	Monckeberg Medial Calcific Sclerosis	C0887866	disease	Nutritional and Metabolic Diseases	Disease or Syndrome	5	0	0.01	1	1	0	1999	1999
SPARC	6678	Ovarian adenocarcinoma	C0948216	disease	Neoplasms; Female Urogenital Diseases and Pregnancy Complications; Endocrine System Diseases	Neoplastic Process	43	1	0.01	1	1	0	1999	1999
SPARC	6678	Impaired insulin secretion	C0948379	disease		Disease or Syndrome	88	14	0.01	1	1	0	2019	2019
SPARC	6678	Squamous cell carcinoma of the head and neck	C1168401	disease	Neoplasms	Neoplastic Process	1543	348	0.01	1	1	0	2005	2005
SPARC	6678	Ductal Carcinoma	C1176475	disease	Neoplasms	Neoplastic Process	273	11	0.01	1	1	0	2005	2005
SPARC	6678	Chronic myeloproliferative disorder	C1292778	disease	Neoplasms; Hemic and Lymphatic Diseases	Neoplastic Process	366	47	0.01	1	1	0	2012	2012
SPARC	6678	Pancreatic intraepithelial neoplasia	C1301034	disease	Neoplasms	Neoplastic Process	186	11	0.01	1	1	0	2019	2019
SPARC	6678	Adenoma of large intestine	C1302401	disease	Digestive System Diseases; Neoplasms	Neoplastic Process	452	213	0.01	1	1	0	2019	2019
SPARC	6678	Childhood Leukemia	C1332977	disease	Neoplasms	Neoplastic Process	1740	140	0.01	1	1	0	2013	2013
SPARC	6678	Hypopharyngeal Carcinoma	C1368404	disease	Neoplasms; Stomatognathic Diseases; Otorhinolaryngologic Diseases	Neoplastic Process	103	1	0.01	1	1	0	2018	2018
SPARC	6678	Renal carcinoma	C1378703	disease	Neoplasms; Female Urogenital Diseases and Pregnancy Complications; Male Urogenital Diseases	Neoplastic Process	665	21	0.01	1	1	0	2001	2001
SPARC	6678	Hepatocarcinogenesis	C1512409	disease	Pathological Conditions, Signs and Symptoms; Neoplasms	Neoplastic Process	855	24	0.01	1	1	0	2011	2011
SPARC	6678	Morphea	C1527383	disease	Skin and Connective Tissue Diseases	Disease or Syndrome	20	0	0.01	1	1	0	1991	1991
SPARC	6678	Adenocarcinoma, Endometrioid	C1569637	disease	Neoplasms; Female Urogenital Diseases and Pregnancy Complications; Endocrine System Diseases	Neoplastic Process	130	4	0.01	1	1	0	2014	2014
SPARC	6678	Carcinoma of urinary bladder, invasive	C1827293	disease	Neoplasms; Female Urogenital Diseases and Pregnancy Complications; Male Urogenital Diseases	Neoplastic Process	287	14	0.01	1	1	0	2001	2001
SPARC	6678	PIGMENTARY DISORDER, RETICULATE, WITH SYSTEMIC MANIFESTATIONS	C1845050	disease	Pathological Conditions, Signs and Symptoms; Congenital, Hereditary, and Neonatal Diseases and Abnormalities; Nutritional and Metabolic Diseases; Skin and Connective Tissue Diseases	Disease or Syndrome	209	37	0.01	1	1	0	2009	2009
SPARC	6678	Pterygium Of Conjunctiva And Cornea	C1867441	disease	Eye Diseases	Disease or Syndrome	169	4	0.01	1	1	0	2012	2012
SPARC	6678	HER2-positive carcinoma of breast	C1960398	disease	Neoplasms; Skin and Connective Tissue Diseases	Neoplastic Process	288	26	0.01	1	1	0	2013	2013
SPARC	6678	Tubulointerstitial fibrosis	C1969372	phenotype		Disease or Syndrome	328	0	0.01	1	1	0	2007	2007
SPARC	6678	Oropharyngeal Carcinoma	C2349952	disease	Neoplasms; Stomatognathic Diseases; Otorhinolaryngologic Diseases	Neoplastic Process	115	15	0.01	1	1	0	2016	2016
SPARC	6678	Neurodegeneration with brain iron accumulation (NBIA)	C2931845	disease	Nutritional and Metabolic Diseases; Nervous System Diseases	Disease or Syndrome	40	2	0.01	1	1	0	2019	2019
SPARC	6678	Clear-cell metastatic renal cell carcinoma	C2931852	disease	Neoplasms; Female Urogenital Diseases and Pregnancy Complications; Male Urogenital Diseases	Neoplastic Process	260	11	0.01	1	1	0	2001	2001
SPARC	6678	Spindle Cell Oncocytoma of the Adenohypophysis	C2986561	disease	Neoplasms	Neoplastic Process	35	2	0.01	1	1	0	2011	2011
SPARC	6678	PARKINSON DISEASE, LATE-ONSET	C3160718	disease		Disease or Syndrome	247	76	0.01	1	1	0	2012	2012
SPARC	6678	Multiple Chronic Conditions	C3266262	disease	Pathological Conditions, Signs and Symptoms	Disease or Syndrome	929	42	0.01	1	1	0	2012	2012
SPARC	6678	Ewing Sarcoma/Peripheral Primitive Neuroectodermal Tumor	C3536893	disease	Neoplasms	Neoplastic Process	95	1	0.01	1	1	0	2010	2010
SPARC	6678	Triple Negative Breast Neoplasms	C3539878	disease	Neoplasms; Skin and Connective Tissue Diseases	Neoplastic Process	1674	99	0.01	1	1	0	2016	2016
SPARC	6678	Luminal A Breast Carcinoma	C3642345	disease		Neoplastic Process	153	11	0.01	1	1	0	2019	2019
SPARC	6678	Skin Erosion	C3887524	disease	Skin and Connective Tissue Diseases	Disease or Syndrome	225	2	0.01	0	1	0	2015	2015
SPARC	6678	Obesity, Metabolically Benign	C4042861	phenotype	Pathological Conditions, Signs and Symptoms; Nutritional and Metabolic Diseases	Sign or Symptom	19	8	0.01	1	1	0	2018	2018
SPARC	6678	cervical cancer	C4048328	disease	Neoplasms; Female Urogenital Diseases and Pregnancy Complications	Neoplastic Process	1817	268	0.01	1	1	0	2012	2012
SPARC	6678	Childhood Astrocytoma	C4086152	disease	Neoplasms	Neoplastic Process	615	39	0.01	1	1	0	2002	2002
SPARC	6678	PATENT DUCTUS ARTERIOSUS 1	C4282128	disease	Congenital, Hereditary, and Neonatal Diseases and Abnormalities; Cardiovascular Diseases	Congenital Abnormality	229	12	0.01	1	1	0	2017	2017
SPARC	6678	Pterygium of eye	C4520843	disease	Eye Diseases	Disease or Syndrome	169	4	0.01	1	1	0	2012	2012
SPARC	6678	Refractory Colorectal Carcinoma	C4688318	disease	Digestive System Diseases; Neoplasms	Neoplastic Process	9	2	0.01	1	1	0	2007	2007
SPARC	6678	Triple-Negative Breast Carcinoma	C4722518	disease	Neoplasms; Skin and Connective Tissue Diseases	Neoplastic Process	1598	96	0.01	1	1	0	2016	2016
SPARC	6678	Metastatic Malignant Neoplasm in the Viscera	C4725861	disease		Neoplastic Process	30	2	0.01	1	1	0	2017	2017
SPARC	6678	HER2-negative breast cancer	C4733095	disease		Neoplastic Process	160	18	0.01	1	1	0	2013	2013
SMOC1	64093	Waardenburg Anophthalmia Syndrome	C0599973	disease	Congenital, Hereditary, and Neonatal Diseases and Abnormalities	Disease or Syndrome	8	10	0.99	1	10	10	2011	2019
SMOC1	64093	Disorder of eye	C0015397	group	Eye Diseases	Disease or Syndrome	400	14	0.3		0	0
SMOC1	64093	Liver Cirrhosis, Experimental	C0023893	disease	Pathological Conditions, Signs and Symptoms; Digestive System Diseases	Experimental Model of Disease	870	0	0.3	1	1	0	2014	2014
SMOC1	64093	Polydactyly	C0152427	disease	Congenital, Hereditary, and Neonatal Diseases and Abnormalities; Musculoskeletal Diseases	Congenital Abnormality	188	43	0.3	1	1	0	2011	2011
SMOC1	64093	Klippel-Trenaunay-Weber Syndrome	C0022739	disease	Cardiovascular Diseases	Disease or Syndrome	14	6	0.2	1	2	0	2011	2011
SMOC1	64093	Nail-Patella Syndrome	C0027341	disease	Congenital, Hereditary, and Neonatal Diseases and Abnormalities; Skin and Connective Tissue Diseases; Musculoskeletal Diseases	Disease or Syndrome	38	18	0.2	1	2	0	2011	2011
SMOC1	64093	Rubinstein-Taybi Syndrome	C0035934	disease	Congenital, Hereditary, and Neonatal Diseases and Abnormalities; Musculoskeletal Diseases; Nervous System Diseases	Disease or Syndrome	31	88	0.2	1	2	0	2011	2011
SMOC1	64093	Thrombocytopenia-Absent Radius Syndrome	C0175703	disease	Congenital, Hereditary, and Neonatal Diseases and Abnormalities; Musculoskeletal Diseases; Hemic and Lymphatic Diseases	Disease or Syndrome	12	5	0.2	1	2	0	2011	2011
SMOC1	64093	VATER Association	C0220708	disease	Congenital, Hereditary, and Neonatal Diseases and Abnormalities; Digestive System Diseases; Cardiovascular Diseases	Disease or Syndrome	12	0	0.2	1	2	0	2011	2011
SMOC1	64093	Holt-Oram syndrome	C0265264	disease	Congenital, Hereditary, and Neonatal Diseases and Abnormalities; Musculoskeletal Diseases; Cardiovascular Diseases	Disease or Syndrome	28	69	0.2	1	2	0	2011	2011
SMOC1	64093	Congenital malformation syndromes involving limbs	C0431766	disease	Congenital, Hereditary, and Neonatal Diseases and Abnormalities; Musculoskeletal Diseases	Congenital Abnormality	1	0	0.2	1	2	0	2011	2011
SMOC1	64093	Sirenomelia syndrome	C1406717	disease		Disease or Syndrome	1	0	0.2	1	2	0	2011	2011
SMOC1	64093	Cleft Palate	C0008925	disease	Congenital, Hereditary, and Neonatal Diseases and Abnormalities; Musculoskeletal Diseases; Stomatognathic Diseases	Congenital Abnormality	611	158	0.11	1	1	0	2011	2011
SMOC1	64093	Intellectual Disability	C3714756	group	Pathological Conditions, Signs and Symptoms; Nervous System Diseases; Mental Disorders; Behavior and Behavior Mechanisms	Mental or Behavioral Dysfunction	2165	159	0.11	1	1	0	1996	1996
SMOC1	64093	Anophthalmos	C0003119	disease	Congenital, Hereditary, and Neonatal Diseases and Abnormalities; Eye Diseases	Congenital Abnormality	89	6	0.1		0	0
SMOC1	64093	Blepharophimosis	C0005744	disease	Congenital, Hereditary, and Neonatal Diseases and Abnormalities; Eye Diseases	Congenital Abnormality	106	15	0.1		0	0
SMOC1	64093	Body Height	C0005890	phenotype		Organism Attribute	1903	3972	0.1	1	1	1	2019	2019
SMOC1	64093	Bone Density	C0005938	phenotype		Clinical Attribute	138	654	0.1	1	1	1	2014	2014
SMOC1	64093	Cleft upper lip	C0008924	disease	Congenital, Hereditary, and Neonatal Diseases and Abnormalities; Stomatognathic Diseases	Congenital Abnormality	255	282	0.1		0	0
SMOC1	64093	Congenital clubfoot	C0009081	disease	Congenital, Hereditary, and Neonatal Diseases and Abnormalities; Musculoskeletal Diseases	Congenital Abnormality	285	44	0.1		0	0
SMOC1	64093	Cryptorchidism	C0010417	disease	Congenital, Hereditary, and Neonatal Diseases and Abnormalities; Male Urogenital Diseases; Endocrine System Diseases	Congenital Abnormality	725	80	0.1		0	0
SMOC1	64093	Dwarfism	C0013336	disease	Congenital, Hereditary, and Neonatal Diseases and Abnormalities; Musculoskeletal Diseases; Endocrine System Diseases	Congenital Abnormality	1261	77	0.1		0	0
SMOC1	64093	Red Blood Cell Count measurement	C0014772	phenotype		Laboratory Procedure	717	1599	0.1	1	1	1	2019	2019
SMOC1	64093	Failure to Thrive	C0015544	disease	Pathological Conditions, Signs and Symptoms	Disease or Syndrome	842	10	0.1		0	0
SMOC1	64093	Hydrocephalus	C0020255	disease	Nervous System Diseases	Disease or Syndrome	473	37	0.1		0	0
SMOC1	64093	Micrognathism	C0025990	disease	Congenital, Hereditary, and Neonatal Diseases and Abnormalities; Musculoskeletal Diseases; Stomatognathic Diseases	Congenital Abnormality	586	53	0.1		0	0
SMOC1	64093	Microphthalmos	C0026010	disease	Congenital, Hereditary, and Neonatal Diseases and Abnormalities; Eye Diseases	Congenital Abnormality	337	40	0.1		0	1
SMOC1	64093	Moderate intellectual disability	C0026351	disease	Pathological Conditions, Signs and Symptoms; Nervous System Diseases; Mental Disorders; Behavior and Behavior Mechanisms	Mental or Behavioral Dysfunction	251	94	0.1		0	0
SMOC1	64093	Optic Atrophy	C0029124	disease	Eye Diseases; Nervous System Diseases	Disease or Syndrome	568	51	0.1		0	0
SMOC1	64093	Severe intellectual disability	C0036857	disease	Pathological Conditions, Signs and Symptoms; Nervous System Diseases; Mental Disorders; Behavior and Behavior Mechanisms	Mental or Behavioral Dysfunction	429	74	0.1		0	0
SMOC1	64093	Venous Insufficiency	C0042485	disease	Cardiovascular Diseases	Disease or Syndrome	17	1	0.1		0	0
SMOC1	64093	Arhinencephaly	C0078982	disease	Congenital, Hereditary, and Neonatal Diseases and Abnormalities; Musculoskeletal Diseases; Nervous System Diseases	Congenital Abnormality	35	0	0.1		0	0
SMOC1	64093	Bone Mineral Density Test	C0177804	phenotype		Diagnostic Procedure	54	314	0.1	1	1	1	2014	2014
SMOC1	64093	Triglycerides measurement	C0202236	phenotype		Laboratory Procedure	563	1418	0.1	1	1	1	2018	2018
SMOC1	64093	Syndactyly of fingers	C0221352	disease	Congenital, Hereditary, and Neonatal Diseases and Abnormalities; Female Urogenital Diseases and Pregnancy Complications; Musculoskeletal Diseases	Congenital Abnormality	171	12	0.1		0	0
SMOC1	64093	Horseshoe Kidney	C0221353	disease	Congenital, Hereditary, and Neonatal Diseases and Abnormalities; Female Urogenital Diseases and Pregnancy Complications; Male Urogenital Diseases	Congenital Abnormality	51	3	0.1		0	0
SMOC1	64093	Frontal bossing	C0221354	disease	Congenital, Hereditary, and Neonatal Diseases and Abnormalities; Musculoskeletal Diseases	Congenital Abnormality	321	22	0.1		0	0
SMOC1	64093	Low set ears	C0239234	disease		Congenital Abnormality	489	64	0.1		0	0
SMOC1	64093	Hypoplasia of the maxilla	C0240310	disease		Congenital Abnormality	113	5	0.1		0	0
SMOC1	64093	Byzanthine arch palate	C0240635	disease	Congenital, Hereditary, and Neonatal Diseases and Abnormalities; Musculoskeletal Diseases; Nervous System Diseases; Stomatognathic Diseases	Congenital Abnormality	497	70	0.1		0	0
SMOC1	64093	Cardiovascular Abnormalities	C0243050	group	Congenital, Hereditary, and Neonatal Diseases and Abnormalities; Cardiovascular Diseases	Congenital Abnormality	99	12	0.1		0	0
SMOC1	64093	Tarsal Coalition	C0265654	disease	Congenital, Hereditary, and Neonatal Diseases and Abnormalities; Musculoskeletal Diseases	Congenital Abnormality	22	1	0.1		0	0
SMOC1	64093	Syndactyly of the toes	C0265660	disease	Congenital, Hereditary, and Neonatal Diseases and Abnormalities; Musculoskeletal Diseases	Congenital Abnormality	129	11	0.1		0	0
SMOC1	64093	Macrodontia	C0266036	disease	Congenital, Hereditary, and Neonatal Diseases and Abnormalities; Stomatognathic Diseases	Congenital Abnormality	12	1	0.1		0	0
SMOC1	64093	Nasal Flaring	C0277873	phenotype		Sign or Symptom	5	0	0.1		0	0
SMOC1	64093	Osseous ankylosis	C0332790	disease	Musculoskeletal Diseases	Acquired Abnormality	10	1	0.1		0	1
SMOC1	64093	Short stature	C0349588	phenotype		Finding	1127	292	0.1		0	0
SMOC1	64093	Downward slant of palpebral fissure	C0423110	phenotype		Finding	391	49	0.1		0	0
SMOC1	64093	Short palpebral fissure	C0423112	phenotype		Finding	91	16	0.1		0	0
SMOC1	64093	Single transverse palmar crease	C0424731	phenotype	Congenital, Hereditary, and Neonatal Diseases and Abnormalities	Finding	78	14	0.1		0	0
SMOC1	64093	Broad thumbs	C0426891	phenotype		Finding	67	11	0.1		0	0
SMOC1	64093	Red cell distribution width determination	C0427460	phenotype		Laboratory Procedure	593	988	0.1	1	3	2	2016	2019
SMOC1	64093	Posteriorly rotated ear	C0431478	disease		Congenital Abnormality	176	23	0.1		0	0
SMOC1	64093	Ulnar polydactyly of fingers	C0431904	disease	Congenital, Hereditary, and Neonatal Diseases and Abnormalities; Musculoskeletal Diseases	Congenital Abnormality	92	11	0.1		0	0
SMOC1	64093	Growth delay	C0456070	phenotype		Pathologic Function	244	40	0.1		0	0
SMOC1	64093	Mean Corpuscular Volume (result)	C0524587	phenotype		Laboratory or Test Result	269	549	0.1	1	1	1	2012	2012
SMOC1	64093	Thin lips	C0578038	phenotype		Finding	99	8	0.1		0	0
SMOC1	64093	Absent finger	C0728895	disease	Congenital, Hereditary, and Neonatal Diseases and Abnormalities; Musculoskeletal Diseases	Congenital Abnormality	26	0	0.1		0	0
SMOC1	64093	Systolic Pressure	C0871470	phenotype		Clinical Attribute	843	1931	0.1	1	1	1	2019	2019
SMOC1	64093	Deformity of lower limb	C1096086	disease		Anatomical Abnormality	11	5	0.1		0	1
SMOC1	64093	Finding of Mean Corpuscular Hemoglobin	C1261502	phenotype		Finding	653	1206	0.1	1	2	1	2016	2019
SMOC1	64093	RDW - Red blood cell distribution width result	C1304746	phenotype		Laboratory or Test Result	593	988	0.1	1	3	2	2016	2019
SMOC1	64093	Fibular hypoplasia	C1832119	phenotype		Finding	16	0	0.1		0	0
SMOC1	64093	Synostosis of carpal bones	C1836193	phenotype		Finding	23	0	0.1		0	0
SMOC1	64093	Depressed nasal bridge	C1836542	phenotype		Finding	426	39	0.1		0	0
SMOC1	64093	Tibial bowing	C1837081	phenotype	Musculoskeletal Diseases	Finding	25	0	0.1		0	0
SMOC1	64093	Prominent forehead	C1837260	phenotype		Finding	159	25	0.1		0	0
SMOC1	64093	Abnormal form of the vertebral bodies	C1839326	phenotype		Finding	89	0	0.1		0	0
SMOC1	64093	Deep philtrum	C1839797	phenotype		Finding	42	5	0.1		0	0
SMOC1	64093	Sandal gap	C1840069	phenotype		Finding	62	6	0.1		0	0
SMOC1	64093	Large earlobe	C1844573	phenotype		Finding	18	2	0.1		0	0
SMOC1	64093	Clinodactyly of the 5th finger	C1850049	disease		Congenital Abnormality	284	39	0.1		0	0
SMOC1	64093	Short tibia	C1850259	phenotype		Finding	17	0	0.1		0	0
SMOC1	64093	Short nose	C1854114	phenotype		Finding	265	23	0.1		0	0
SMOC1	64093	Low-set, posteriorly rotated ears	C1857486	phenotype		Finding	223	19	0.1		0	0
SMOC1	64093	Death in infancy	C1858430	phenotype		Finding	146	7	0.1		0	0
SMOC1	64093	Camptodactyly of 2nd-5th fingers	C1859368	phenotype		Finding	1	0	0.1		0	0
SMOC1	64093	Fused fourth and fifth metacarpals	C1859768	phenotype		Finding	3	0	0.1		0	0
SMOC1	64093	Postnatal growth retardation	C1859778	phenotype		Finding	121	11	0.1		0	0
SMOC1	64093	Bilateral single transverse palmar creases	C1862095	phenotype		Finding	65	1	0.1		0	0
SMOC1	64093	Long philtrum	C1865014	phenotype		Finding	282	16	0.1		0	0
SMOC1	64093	Postaxial foot polydactyly	C2112129	disease	Congenital, Hereditary, and Neonatal Diseases and Abnormalities; Musculoskeletal Diseases	Congenital Abnormality	45	4	0.1		0	0
SMOC1	64093	True anophthalmia	C2675590	phenotype	Congenital, Hereditary, and Neonatal Diseases and Abnormalities; Eye Diseases	Finding	1	1	0.1		0	1
SMOC1	64093	Short Stature, CTCAE	C2919142	phenotype		Finding	1010	0	0.1		0	0
SMOC1	64093	Blood Protein Measurement	C2985280	phenotype		Laboratory Procedure	1156	2575	0.1	1	2	2	2018	2018
SMOC1	64093	Retrognathia	C3494422	disease	Congenital, Hereditary, and Neonatal Diseases and Abnormalities; Musculoskeletal Diseases; Stomatognathic Diseases	Anatomical Abnormality	191	11	0.1		0	0
SMOC1	64093	Joint hyperflexibility	C3553764	phenotype		Finding	181	12	0.1		0	0
SMOC1	64093	Abnormal eyebrow morphology	C4011556	group		Anatomical Abnormality	29	1	0.1		0	0
SMOC1	64093	Hypoplasia of the premaxilla	C4020770	phenotype		Finding	3	0	0.1		0	0
SMOC1	64093	Abnormality of the upper limb	C4020900	phenotype		Anatomical Abnormality	6	4	0.1		0	1
SMOC1	64093	Abnormality of the metacarpal bones	C4021785	disease	Musculoskeletal Diseases	Anatomical Abnormality	40	3	0.1		0	0
SMOC1	64093	Foot oligodactyly	C4281601	phenotype		Anatomical Abnormality	9	1	0.1		0	1
SMOC1	64093	Corpuscular Hemoglobin Concentration Mean	C4528257	phenotype		Laboratory or Test Result	401	4389	0.1	1	1	8	2012	2012
SMOC1	64093	Flared nostrils abnormality	C4551517	phenotype		Finding	6	1	0.1		0	0
SMOC1	64093	Virus Diseases	C0042769	group	Infections	Disease or Syndrome	1471	42	0.07	1	7	0	2010	2019
SMOC1	64093	Hepatitis C	C0019196	disease	Digestive System Diseases; Infections	Disease or Syndrome	1768	347	0.04	1	4	0	2009	2012
SMOC1	64093	Congenital Abnormality	C0000768	group	Congenital, Hereditary, and Neonatal Diseases and Abnormalities	Congenital Abnormality	1098	73	0.02	1	2	0	2019	2019
SMOC1	64093	Systemic Scleroderma	C0036421	disease	Skin and Connective Tissue Diseases	Disease or Syndrome	979	287	0.02	1	2	0	2007	2014
SMOC1	64093	Flavivirus Infections	C0206608	group	Infections	Disease or Syndrome	30	0	0.02	1	2	0	2018	2018
SMOC1	64093	West Nile viral infection	C1096184	disease	Infections; Nervous System Diseases	Disease or Syndrome	164	2	0.02	1	2	0	2009	2010
SMOC1	64093	Agenesis	C0000846	disease		Congenital Abnormality	161	44	0.01	1	1	0	2011	2011
SMOC1	64093	Dengue Fever	C0011311	disease	Infections	Disease or Syndrome	360	39	0.01	1	1	0	2015	2015
SMOC1	64093	Diabetes Mellitus, Insulin-Dependent	C0011854	disease	Nutritional and Metabolic Diseases; Immune System Diseases; Endocrine System Diseases	Disease or Syndrome	1675	954	0.01	1	1	0	2006	2006
SMOC1	64093	Patent ductus arteriosus	C0013274	disease	Congenital, Hereditary, and Neonatal Diseases and Abnormalities; Cardiovascular Diseases	Congenital Abnormality	510	56	0.01	1	1	0	2013	2013
SMOC1	64093	Encephalitis	C0014038	disease	Nervous System Diseases	Disease or Syndrome	324	18	0.01	1	1	0	2018	2018
SMOC1	64093	Glioma	C0017638	disease	Neoplasms	Neoplastic Process	3097	353	0.01	1	1	0	2019	2019
SMOC1	64093	Hepatitis B	C0019163	disease	Digestive System Diseases; Infections	Disease or Syndrome	1449	519	0.01	1	1	0	2011	2011
SMOC1	64093	Keratosis Follicularis	C0022595	disease	Congenital, Hereditary, and Neonatal Diseases and Abnormalities; Skin and Connective Tissue Diseases	Disease or Syndrome	57	21	0.01	1	1	0	1998	1998
SMOC1	64093	Mental Retardation	C0025362	disease	Pathological Conditions, Signs and Symptoms; Congenital, Hereditary, and Neonatal Diseases and Abnormalities; Nervous System Diseases; Mental Disorders; Behavior and Behavior Mechanisms	Mental or Behavioral Dysfunction	505	98	0.01	1	1	0	1996	1996
SMOC1	64093	Neoplasms	C0027651	group	Neoplasms	Neoplastic Process	10161	1644	0.01	1	1	0	2017	2017
SMOC1	64093	Neuroblastoma	C0027819	disease	Neoplasms	Neoplastic Process	2509	386	0.01	1	1	0	1995	1995
SMOC1	64093	Rubella	C0035920	disease	Infections	Disease or Syndrome	82	11	0.01	1	1	0	2010	2010
SMOC1	64093	Syndactyly	C0039075	disease	Congenital, Hereditary, and Neonatal Diseases and Abnormalities; Musculoskeletal Diseases	Congenital Abnormality	127	26	0.01	1	1	0	2011	2011
SMOC1	64093	Urticaria	C0042109	disease	Skin and Connective Tissue Diseases; Immune System Diseases	Disease or Syndrome	168	11	0.01	1	1	0	2018	2018
SMOC1	64093	Complete atrioventricular block	C0151517	disease	Pathological Conditions, Signs and Symptoms; Cardiovascular Diseases	Disease or Syndrome	403	96	0.01	1	1	0	2016	2016
SMOC1	64093	Aarskog syndrome	C0175701	disease	Congenital, Hereditary, and Neonatal Diseases and Abnormalities; Musculoskeletal Diseases; Endocrine System Diseases; Cardiovascular Diseases	Disease or Syndrome	42	24	0.01	1	1	0	1994	1994
SMOC1	64093	Cervical Intraepithelial Neoplasia	C0206708	disease	Neoplasms	Neoplastic Process	398	29	0.01	1	1	0	2009	2009
SMOC1	64093	Congenital defects	C0220810	group		Congenital Abnormality	126	6	0.01	1	1	0	2019	2019
SMOC1	64093	Welts	C0221232	phenotype	Pathological Conditions, Signs and Symptoms; Skin and Connective Tissue Diseases; Immune System Diseases	Sign or Symptom	53	0	0.01	1	1	0	2018	2018
SMOC1	64093	Dermatomyositis, Childhood Type	C0263666	disease	Skin and Connective Tissue Diseases; Musculoskeletal Diseases; Nervous System Diseases	Disease or Syndrome	62	1	0.01	1	1	0	2018	2018
SMOC1	64093	Polysyndactyly	C0265553	disease	Congenital, Hereditary, and Neonatal Diseases and Abnormalities; Musculoskeletal Diseases	Congenital Abnormality	12	1	0.01	0	1	0	1994	1994
SMOC1	64093	Vesicular Stomatitis	C0266999	disease	Infections; Stomatognathic Diseases; Animal Diseases	Disease or Syndrome	112	0	0.01	1	1	0	2013	2013
SMOC1	64093	Rhinovirus infection	C0276447	disease	Infections	Disease or Syndrome	202	4	0.01	1	1	0	2017	2017
SMOC1	64093	Deformity	C0302142	group	Pathological Conditions, Signs and Symptoms; Congenital, Hereditary, and Neonatal Diseases and Abnormalities	Anatomical Abnormality	350	26	0.01	1	1	0	2019	2019
SMOC1	64093	Tumor necrosis	C0333516	phenotype	Pathological Conditions, Signs and Symptoms	Neoplastic Process	350	1	0.01	1	1	0	2013	2013
SMOC1	64093	Hepatitis C, Chronic	C0524910	disease	Digestive System Diseases; Infections	Disease or Syndrome	430	80	0.01	1	1	0	2011	2011
SMOC1	64093	Central neuroblastoma	C0700095	disease	Neoplasms; Nervous System Diseases	Neoplastic Process	2419	231	0.01	1	1	0	1995	1995
SMOC1	64093	Cleft palate, isolated	C1837218	disease	Congenital, Hereditary, and Neonatal Diseases and Abnormalities; Musculoskeletal Diseases; Stomatognathic Diseases	Congenital Abnormality	295	70	0.01	1	1	0	2011	2011
SMOC1	64093	Malformations of Cortical Development, Group II	C1837249	disease	Congenital, Hereditary, and Neonatal Diseases and Abnormalities; Nervous System Diseases	Congenital Abnormality	180	101	0.01	1	1	0	2019	2019
SMOC1	64093	Trichohepatoenteric Syndrome	C1857276	disease	Pathological Conditions, Signs and Symptoms; Congenital, Hereditary, and Neonatal Diseases and Abnormalities; Female Urogenital Diseases and Pregnancy Complications; Skin and Connective Tissue Diseases	Disease or Syndrome	424	28	0.01	1	1	0	2019	2019
SMOC1	64093	Oral allergy syndrome	C2316159	phenotype	Immune System Diseases	Disease or Syndrome	3	0	0.01	1	1	0	2018	2018
SMOC1	64093	HIV-1 infection	C2363741	disease		Disease or Syndrome	695	94	0.01	1	1	0	2016	2016
SMOC1	64093	Uranostaphyloschisis	C2981150	disease	Congenital, Hereditary, and Neonatal Diseases and Abnormalities; Musculoskeletal Diseases; Respiratory Tract Diseases; Stomatognathic Diseases; Otorhinolaryngologic Diseases	Congenital Abnormality	190	75	0.01	1	1	0	2011	2011
SMOC1	64093	Childhood Neuroblastoma	C4086165	disease	Neoplasms	Neoplastic Process	2420	231	0.01	1	1	0	1995	1995
SMOC1	64093	PATENT DUCTUS ARTERIOSUS 1	C4282128	disease	Congenital, Hereditary, and Neonatal Diseases and Abnormalities; Cardiovascular Diseases	Congenital Abnormality	229	12	0.01	1	1	0	2013	2013
SCRG1	11341	Fibrosis, Liver	C0239946	disease	Pathological Conditions, Signs and Symptoms; Digestive System Diseases	Disease or Syndrome	1179	64	0.01	1	1	0	2019	2019
PTN	5764	Carcinoma	C0007097	group	Neoplasms	Neoplastic Process	2462	103	0.3	1	1	0	2005	2005
PTN	5764	Liver Cirrhosis, Experimental	C0023893	disease	Pathological Conditions, Signs and Symptoms; Digestive System Diseases	Experimental Model of Disease	870	0	0.3	1	1	0	2014	2014
PTN	5764	Animal Mammary Neoplasms	C0024667	phenotype	Neoplasms; Animal Diseases	Neoplastic Process	147	0	0.3	1	1	0	2005	2005
PTN	5764	Mammary Neoplasms, Experimental	C0024668	phenotype	Neoplasms	Neoplastic Process; Experimental Model of Disease	218	0	0.3	1	1	0	2005	2005
PTN	5764	Anaplastic carcinoma	C0205696	disease	Neoplasms	Neoplastic Process	232	3	0.3	1	1	0	2005	2005
PTN	5764	Carcinoma, Spindle-Cell	C0205697	disease	Neoplasms	Neoplastic Process	218	5	0.3	1	1	0	2005	2005
PTN	5764	Undifferentiated carcinoma	C0205698	disease	Neoplasms	Neoplastic Process	283	8	0.3	1	1	0	2005	2005
PTN	5764	Carcinomatosis	C0205699	phenotype	Neoplasms	Neoplastic Process	186	2	0.3	1	1	0	2005	2005
PTN	5764	Mammary Carcinoma, Animal	C1257925	disease	Neoplasms; Animal Diseases	Neoplastic Process	144	0	0.3	1	1	0	2005	2005
PTN	5764	Liver Cirrhosis	C0023890	disease	Pathological Conditions, Signs and Symptoms; Digestive System Diseases	Disease or Syndrome	1182	189	0.21	1	1	0	2008	2008
PTN	5764	Parkinson Disease	C0030567	disease	Nervous System Diseases	Disease or Syndrome	2078	990	0.21	1	2	0	2009	2018
PTN	5764	Cholestasis, Extrahepatic	C0005398	disease	Digestive System Diseases	Disease or Syndrome	87	0	0.2	1	1	0	2008	2008
PTN	5764	Transient Ischemic Attack	C0007787	disease	Nervous System Diseases; Cardiovascular Diseases	Disease or Syndrome	344	16	0.2	1	1	0	1998	1998
PTN	5764	Experimental Autoimmune Encephalomyelitis	C0014072	disease	Immune System Diseases; Nervous System Diseases	Experimental Model of Disease	97	0	0.2	1	1	0	1998	1998
PTN	5764	Myocardial Infarction	C0027051	disease	Pathological Conditions, Signs and Symptoms; Cardiovascular Diseases	Disease or Syndrome	1800	680	0.2	1	1	0	2007	2007
PTN	5764	Left Ventricular Hypertrophy	C0149721	disease	Pathological Conditions, Signs and Symptoms; Cardiovascular Diseases	Disease or Syndrome	403	67	0.2	1	1	0	2010	2010
PTN	5764	Sciatic Neuropathy	C0149940	disease	Nervous System Diseases	Disease or Syndrome	115	0	0.2	1	1	0	2008	2008
PTN	5764	Visual seizure	C0270824	disease	Pathological Conditions, Signs and Symptoms; Nervous System Diseases	Disease or Syndrome	209	0	0.2	1	1	0	1993	1993
PTN	5764	Malignant Neoplasms	C0006826	group	Neoplasms	Neoplastic Process	8621	1641	0.1	1	17	0	1992	2020
PTN	5764	Glioblastoma	C0017636	disease	Neoplasms	Neoplastic Process	3177	281	0.1	1	15	0	2002	2017
PTN	5764	Glioma	C0017638	disease	Neoplasms	Neoplastic Process	3097	353	0.1	1	12	0	2002	2020
PTN	5764	Neoplasm Metastasis	C0027627	phenotype	Pathological Conditions, Signs and Symptoms; Neoplasms	Neoplastic Process	6385	327	0.1	1	15	0	1994	2019
PTN	5764	Neoplasms	C0027651	group	Neoplasms	Neoplastic Process	10161	1644	0.1	0.885	26	0	1992	2018
PTN	5764	Adult Glioblastoma	C0278878	disease	Neoplasms	Neoplastic Process	2528	98	0.1	1	12	0	2003	2017
PTN	5764	Childhood Glioblastoma	C0280474	disease	Neoplasms	Neoplastic Process	2527	98	0.1	1	12	0	2003	2017
PTN	5764	Primary malignant neoplasm	C1306459	group	Neoplasms	Neoplastic Process	8221	1374	0.1	1	12	0	1992	2020
PTN	5764	Glioblastoma Multiforme	C1621958	disease	Neoplasms	Neoplastic Process	3197	186	0.1	1	12	0	2003	2017
PTN	5764	Blood Protein Measurement	C2985280	phenotype		Laboratory Procedure	1156	2575	0.1	1	2	2	2018	2018
PTN	5764	Malignant neoplasm of lung	C0242379	disease	Neoplasms; Respiratory Tract Diseases	Neoplastic Process	4173	1142	0.07	1	7	0	1993	2017
PTN	5764	Tumor Cell Invasion	C1269955	phenotype		Neoplastic Process	6626	169	0.07	1	7	0	2001	2019
PTN	5764	Malignant neoplasm of breast	C0006142	disease	Neoplasms; Skin and Connective Tissue Diseases	Neoplastic Process	6941	3417	0.06	1	6	0	1992	2017
PTN	5764	Breast Carcinoma	C0678222	disease	Neoplasms; Skin and Connective Tissue Diseases	Neoplastic Process	6776	2793	0.06	1	6	0	1992	2017
PTN	5764	Carcinoma of lung	C0684249	disease	Neoplasms; Respiratory Tract Diseases	Neoplastic Process	4081	1204	0.06	1	6	0	1997	2017
PTN	5764	Primary malignant neoplasm of lung	C1306460	disease	Neoplasms; Respiratory Tract Diseases	Neoplastic Process	3894	981	0.06	1	6	0	1997	2017
PTN	5764	Tumor Progression	C0178874	phenotype	Pathological Conditions, Signs and Symptoms	Neoplastic Process	3865	72	0.05	1	5	0	2015	2019
PTN	5764	melanoma	C0025202	disease	Neoplasms	Neoplastic Process	3087	515	0.04	1	4	0	1996	2017
PTN	5764	Carcinogenesis	C0596263	phenotype	Pathological Conditions, Signs and Symptoms; Neoplasms	Neoplastic Process	6243	355	0.04	1	4	0	2002	2020
PTN	5764	Astrocytoma	C0004114	disease	Neoplasms	Neoplastic Process	985	59	0.03	1	3	0	2003	2015
PTN	5764	Neuroblastoma	C0027819	disease	Neoplasms	Neoplastic Process	2509	386	0.03	1	3	0	2003	2007
PTN	5764	Prostatic Neoplasms	C0033578	group	Neoplasms; Male Urogenital Diseases	Neoplastic Process	1722	31	0.03	1	3	0	2005	2006
PTN	5764	Small cell carcinoma of lung	C0149925	disease	Neoplasms; Respiratory Tract Diseases	Neoplastic Process	972	125	0.03	1	3	0	1997	2019
PTN	5764	Cicatrix, Hypertrophic	C0162810	disease	Pathological Conditions, Signs and Symptoms	Acquired Abnormality	185	3	0.03	1	3	0	2013	2018
PTN	5764	Neurodegenerative Disorders	C0524851	group	Nervous System Diseases	Disease or Syndrome	1515	85	0.03	1	3	0	2015	2019
PTN	5764	Tumor Angiogenesis	C1519670	phenotype	Pathological Conditions, Signs and Symptoms	Neoplastic Process	822	5	0.03	1	3	0	1996	2015
PTN	5764	Rheumatoid Arthritis	C0003873	disease	Skin and Connective Tissue Diseases; Musculoskeletal Diseases; Immune System Diseases	Disease or Syndrome	2723	2387	0.02	1	2	0	2003	2017
PTN	5764	Brain Neoplasms	C0006118	group	Neoplasms; Nervous System Diseases	Neoplastic Process	1018	204	0.02	1	2	0	2009	2017
PTN	5764	Non-Small Cell Lung Carcinoma	C0007131	disease	Neoplasms; Respiratory Tract Diseases	Neoplastic Process	3926	712	0.02	1	2	0	1997	2015
PTN	5764	Choriocarcinoma	C0008497	disease	Neoplasms; Female Urogenital Diseases and Pregnancy Complications	Neoplastic Process	431	2	0.02	1	2	0	1996	2000
PTN	5764	Colorectal Carcinoma	C0009402	disease	Digestive System Diseases; Neoplasms	Neoplastic Process	5473	1962	0.02	1	2	0	1999	2019
PTN	5764	Meningioma	C0025286	disease	Neoplasms; Nervous System Diseases	Neoplastic Process	634	43	0.02	1	2	0	1992	2007
PTN	5764	nervous system disorder	C0027765	group	Nervous System Diseases	Disease or Syndrome	977	39	0.02	1	2	0	2017	2019
PTN	5764	Nervous System Neoplasms	C0027766	group	Neoplasms; Nervous System Diseases	Neoplastic Process	68	1	0.02	1	2	0	2001	2009
PTN	5764	Degenerative polyarthritis	C0029408	disease	Musculoskeletal Diseases	Disease or Syndrome	1827	247	0.02	1	2	0	2003	2007
PTN	5764	Osteoporosis	C0029456	disease	Nutritional and Metabolic Diseases; Musculoskeletal Diseases	Disease or Syndrome	1098	182	0.02	1	2	0	2010	2011
PTN	5764	Osteosarcoma	C0029463	disease	Neoplasms	Neoplastic Process	2283	178	0.02	1	2	0	2017	2019
PTN	5764	Adenocarcinoma of lung (disorder)	C0152013	disease	Neoplasms	Neoplastic Process	2438	563	0.02	1	2	0	2009	2013
PTN	5764	Papillary thyroid carcinoma	C0238463	disease	Neoplasms; Endocrine System Diseases	Neoplastic Process	1348	204	0.02	1	2	0	2016	2017
PTN	5764	Malignant neoplasm of prostate	C0376358	disease	Neoplasms; Male Urogenital Diseases	Neoplastic Process	4502	1082	0.02	1	2	0	1999	2011
PTN	5764	Osteosarcoma of bone	C0585442	disease	Neoplasms	Neoplastic Process	2247	151	0.02	1	2	0	2017	2019
PTN	5764	Prostate carcinoma	C0600139	disease	Neoplasms; Male Urogenital Diseases	Neoplastic Process	4388	1168	0.02	1	2	0	1999	2011
PTN	5764	Central neuroblastoma	C0700095	disease	Neoplasms; Nervous System Diseases	Neoplastic Process	2419	231	0.02	1	2	0	2003	2006
PTN	5764	Schimke immunoosseous dysplasia	C0877024	disease	Congenital, Hereditary, and Neonatal Diseases and Abnormalities; Female Urogenital Diseases and Pregnancy Complications; Musculoskeletal Diseases; Male Urogenital Diseases; Respiratory Tract Diseases; Immune System Diseases; Cardiovascular Diseases	Congenital Abnormality	21	19	0.02	1	2	0	2012	2017
PTN	5764	Childhood Osteosarcoma	C1332986	disease	Neoplasms	Neoplastic Process	2208	151	0.02	1	2	0	2017	2019
PTN	5764	Childhood Neuroblastoma	C4086165	disease	Neoplasms	Neoplastic Process	2420	231	0.02	1	2	0	2003	2006
PTN	5764	Acquired Immunodeficiency Syndrome	C0001175	group	Infections; Immune System Diseases	Disease or Syndrome	243	42	0.01	1	1	0	1999	1999
PTN	5764	Adenocarcinoma	C0001418	group	Neoplasms	Neoplastic Process	2235	168	0.01	1	1	0	2012	2012
PTN	5764	Alzheimer's Disease	C0002395	disease	Nervous System Diseases; Mental Disorders	Disease or Syndrome	3397	1843	0.01	1	1	0	2017	2017
PTN	5764	Arteriosclerosis	C0003850	disease	Cardiovascular Diseases	Disease or Syndrome	2006	267	0.01	1	1	0	2010	2010
PTN	5764	Atherosclerosis	C0004153	disease	Cardiovascular Diseases	Disease or Syndrome	2044	281	0.01	1	1	0	2010	2010
PTN	5764	Autoimmune Diseases	C0004364	group	Immune System Diseases	Disease or Syndrome	1758	428	0.01	1	1	0	2017	2017
PTN	5764	Malignant tumor of colon	C0007102	disease	Digestive System Diseases; Neoplasms	Neoplastic Process	2969	688	0.01	1	1	0	2017	2017
PTN	5764	Malignant tumor of cervix	C0007847	disease	Neoplasms; Female Urogenital Diseases and Pregnancy Complications	Neoplastic Process	1718	245	0.01	1	1	0	2003	2003
PTN	5764	Cholesteatoma	C0008373	disease	Skin and Connective Tissue Diseases	Disease or Syndrome	135	1	0.01	1	1	0	2004	2004
PTN	5764	Diabetic Retinopathy	C0011884	disease	Eye Diseases; Endocrine System Diseases; Cardiovascular Diseases	Disease or Syndrome	645	213	0.01	1	1	0	2017	2017
PTN	5764	Diphtheria	C0012546	disease	Infections	Disease or Syndrome	147	0	0.01	1	1	0	2019	2019
PTN	5764	Dyskinetic syndrome	C0013384	disease	Pathological Conditions, Signs and Symptoms; Nervous System Diseases	Disease or Syndrome	316	42	0.01	1	1	0	2018	2018
PTN	5764	Encephalitis, St. Louis	C0014060	disease	Infections; Nervous System Diseases	Disease or Syndrome	272	34	0.01	1	1	0	2017	2017
PTN	5764	Encephalomyelitis	C0014070	disease	Infections; Nervous System Diseases	Disease or Syndrome	865	7	0.01	1	1	0	2019	2019
PTN	5764	Endometriosis	C0014175	disease	Female Urogenital Diseases and Pregnancy Complications	Disease or Syndrome	1188	274	0.01	1	1	0	2002	2002
PTN	5764	Fatigue	C0015672	phenotype	Pathological Conditions, Signs and Symptoms	Sign or Symptom	760	67	0.01	1	1	0	2017	2017
PTN	5764	Fatty Liver	C0015695	disease	Digestive System Diseases	Disease or Syndrome	875	35	0.01	1	1	0	2017	2017
PTN	5764	Hallervorden-Spatz Syndrome	C0018523	disease	Congenital, Hereditary, and Neonatal Diseases and Abnormalities; Nervous System Diseases	Disease or Syndrome	22	42	0.01	1	1	0	2002	2002
PTN	5764	Sensorineural Hearing Loss (disorder)	C0018784	disease	Pathological Conditions, Signs and Symptoms; Nervous System Diseases; Otorhinolaryngologic Diseases	Disease or Syndrome	783	111	0.01	1	1	0	2019	2019
PTN	5764	Heart failure	C0018801	disease	Cardiovascular Diseases	Disease or Syndrome	1499	201	0.01	1	1	0	2009	2009
PTN	5764	Congestive heart failure	C0018802	disease	Cardiovascular Diseases	Disease or Syndrome	1760	165	0.01	1	1	0	2009	2009
PTN	5764	Hepatitis B	C0019163	disease	Digestive System Diseases; Infections	Disease or Syndrome	1449	519	0.01	1	1	0	2017	2017
PTN	5764	HIV Infections	C0019693	group	Infections; Immune System Diseases	Disease or Syndrome	807	142	0.01	1	1	0	2005	2005
PTN	5764	Inflammation	C0021368	phenotype	Pathological Conditions, Signs and Symptoms	Pathologic Function	467	0	0.01	1	1	0	2002	2002
PTN	5764	Keloid	C0022548	disease	Pathological Conditions, Signs and Symptoms; Skin and Connective Tissue Diseases	Acquired Abnormality	165	15	0.01	1	1	0	2016	2016
PTN	5764	Menkes Kinky Hair Syndrome	C0022716	disease	Congenital, Hereditary, and Neonatal Diseases and Abnormalities; Nutritional and Metabolic Diseases; Skin and Connective Tissue Diseases; Nervous System Diseases	Disease or Syndrome	20	99	0.01	1	1	0	2017	2017
PTN	5764	leukemia	C0023418	disease	Neoplasms	Neoplastic Process	2111	144	0.01	1	1	0	2014	2014
PTN	5764	Chronic Lymphocytic Leukemia	C0023434	disease	Neoplasms; Immune System Diseases; Hemic and Lymphatic Diseases	Neoplastic Process	1447	291	0.01	1	1	0	2014	2014
PTN	5764	Lymphoid leukemia	C0023448	disease	Neoplasms; Immune System Diseases; Hemic and Lymphatic Diseases	Neoplastic Process	288	4	0.01	1	1	0	2014	2014
PTN	5764	Myeloid Leukemia, Chronic	C0023473	disease	Neoplasms; Hemic and Lymphatic Diseases	Neoplastic Process	1172	115	0.01	1	1	0	2020	2020
PTN	5764	Lung diseases	C0024115	group	Respiratory Tract Diseases	Disease or Syndrome	700	50	0.01	1	1	0	2019	2019
PTN	5764	Lupus Erythematosus, Systemic	C0024141	disease	Skin and Connective Tissue Diseases; Immune System Diseases	Disease or Syndrome	1883	1172	0.01	1	1	1	2017	2017
PTN	5764	Lymphoma	C0024299	group	Neoplasms; Immune System Diseases; Hemic and Lymphatic Diseases	Neoplastic Process	1548	91	0.01	1	1	0	2007	2007
PTN	5764	Malignant neoplasm of stomach	C0024623	disease	Digestive System Diseases; Neoplasms	Neoplastic Process	3806	615	0.01	1	1	0	2017	2017
PTN	5764	Metabolic Diseases	C0025517	group	Nutritional and Metabolic Diseases	Disease or Syndrome	945	50	0.01	1	1	0	2019	2019
PTN	5764	Multiple Myeloma	C0026764	disease	Neoplasms; Immune System Diseases; Hemic and Lymphatic Diseases; Cardiovascular Diseases	Neoplastic Process	1740	865	0.01	1	1	0	2009	2009
PTN	5764	Multiple Sclerosis	C0026769	disease	Immune System Diseases; Nervous System Diseases	Disease or Syndrome	1800	1022	0.01	1	1	0	2019	2019
PTN	5764	Nephroblastoma	C0027708	disease	Congenital, Hereditary, and Neonatal Diseases and Abnormalities; Neoplasms; Female Urogenital Diseases and Pregnancy Complications; Male Urogenital Diseases	Neoplastic Process	586	125	0.01	1	1	0	1993	1993
PTN	5764	neurofibroma	C0027830	disease	Neoplasms; Nervous System Diseases	Neoplastic Process	125	5	0.01	1	1	0	2001	2001
PTN	5764	Neurofibromatosis 1	C0027831	disease	Congenital, Hereditary, and Neonatal Diseases and Abnormalities; Neoplasms; Nervous System Diseases	Neoplastic Process	311	827	0.01	1	1	0	2001	2001
PTN	5764	Osteopenia	C0029453	disease	Nutritional and Metabolic Diseases; Musculoskeletal Diseases	Disease or Syndrome	845	61	0.01	1	1	0	2009	2009
PTN	5764	Pancreatic Neoplasm	C0030297	disease	Digestive System Diseases; Neoplasms; Endocrine System Diseases	Neoplastic Process	764	20	0.01	1	1	0	2002	2002
PTN	5764	Peyronie Disease	C0030848	disease	Skin and Connective Tissue Diseases; Male Urogenital Diseases	Disease or Syndrome	41	1	0.01	1	1	0	2004	2004
PTN	5764	Respiratory Distress Syndrome, Adult	C0035222	disease	Respiratory Tract Diseases	Disease or Syndrome	434	60	0.01	1	1	0	2018	2018
PTN	5764	Retinopathy of Prematurity	C0035344	disease	Congenital, Hereditary, and Neonatal Diseases and Abnormalities; Eye Diseases	Disease or Syndrome	202	16	0.01	1	1	0	2017	2017
PTN	5764	synovial sarcoma	C0039101	disease	Neoplasms	Neoplastic Process	299	4	0.01	1	1	0	2017	2017
PTN	5764	Thymoma	C0040100	disease	Neoplasms; Hemic and Lymphatic Diseases	Neoplastic Process	291	20	0.01	1	1	0	2017	2017
PTN	5764	Thyroid Nodule	C0040137	disease	Neoplasms; Endocrine System Diseases	Neoplastic Process	150	17	0.01	1	1	0	2016	2016
PTN	5764	Toxoplasmosis	C0040558	disease	Infections	Disease or Syndrome	112	0	0.01	1	1	0	1999	1999
PTN	5764	Virus Diseases	C0042769	group	Infections	Disease or Syndrome	1471	42	0.01	1	1	0	2017	2017
PTN	5764	Sweet Syndrome	C0085077	disease	Skin and Connective Tissue Diseases	Disease or Syndrome	104	3	0.01	1	1	0	2017	2017
PTN	5764	Sicca Syndrome	C0086981	disease	Eye Diseases; Skin and Connective Tissue Diseases; Musculoskeletal Diseases; Immune System Diseases; Stomatognathic Diseases	Disease or Syndrome	132	4	0.01	1	1	0	2017	2017
PTN	5764	Proliferative diabetic retinopathy	C0154830	disease	Pathological Conditions, Signs and Symptoms; Eye Diseases; Endocrine System Diseases; Cardiovascular Diseases	Disease or Syndrome	180	45	0.01	1	1	0	2015	2015
PTN	5764	Neurofibromatoses	C0162678	group	Congenital, Hereditary, and Neonatal Diseases and Abnormalities; Neoplasms; Nervous System Diseases	Neoplastic Process	135	16	0.01	1	1	0	2001	2001
PTN	5764	Ki-1+ Anaplastic Large Cell Lymphoma	C0206180	disease	Neoplasms; Immune System Diseases; Hemic and Lymphatic Diseases	Neoplastic Process	300	10	0.01	1	1	0	2008	2008
PTN	5764	Cervical Intraepithelial Neoplasia	C0206708	disease	Neoplasms	Neoplastic Process	398	29	0.01	1	1	0	2018	2018
PTN	5764	Pancreatic carcinoma	C0235974	disease	Digestive System Diseases; Neoplasms; Endocrine System Diseases	Neoplastic Process	2689	322	0.01	1	1	0	2017	2017
PTN	5764	bone destruction	C0238790	disease		Disease or Syndrome	234	3	0.01	1	1	0	2004	2004
PTN	5764	Proliferative vitreoretinopathy	C0242852	disease	Eye Diseases	Disease or Syndrome	142	14	0.01	1	1	0	2017	2017
PTN	5764	Exudative age-related macular degeneration	C0271084	disease	Eye Diseases	Disease or Syndrome	158	109	0.01	1	1	0	2017	2017
PTN	5764	stage, cervical cancer	C0280232	phenotype	Neoplasms; Female Urogenital Diseases and Pregnancy Complications	Neoplastic Process	48	0	0.01	0	1	0	2003	2003
PTN	5764	Cervix carcinoma	C0302592	disease	Neoplasms; Female Urogenital Diseases and Pregnancy Complications	Neoplastic Process	1881	283	0.01	1	1	0	2003	2003
PTN	5764	Malignant neoplasm of pancreas	C0346647	disease	Digestive System Diseases; Neoplasms; Endocrine System Diseases	Neoplastic Process	2667	277	0.01	1	1	0	2017	2017
PTN	5764	Endotoxemia	C0376618	phenotype	Pathological Conditions, Signs and Symptoms; Infections	Disease or Syndrome	401	5	0.01	1	1	0	2019	2019
PTN	5764	ovarian serous tumor	C0476122	disease		Neoplastic Process	4	0	0.01	1	1	0	2015	2015
PTN	5764	Secondary malignant neoplasm of liver	C0494165	disease	Digestive System Diseases; Neoplasms	Neoplastic Process	951	34	0.01	1	1	0	2017	2017
PTN	5764	Peritoneal Fibrosis	C0521607	disease	Pathological Conditions, Signs and Symptoms; Digestive System Diseases	Disease or Syndrome	104	0	0.01	1	1	0	2012	2012
PTN	5764	Malignant Glioma	C0555198	disease	Neoplasms	Neoplastic Process	724	22	0.01	1	1	0	2018	2018
PTN	5764	Tumor Initiation	C0598935	phenotype	Pathological Conditions, Signs and Symptoms; Neoplasms	Neoplastic Process	533	8	0.01	1	1	0	2016	2016
PTN	5764	Epithelial ovarian cancer	C0677886	disease	Neoplasms; Female Urogenital Diseases and Pregnancy Complications; Endocrine System Diseases	Neoplastic Process	1224	129	0.01	1	1	0	2015	2015
PTN	5764	Secondary malignant neoplasm of lymph node	C0686619	disease	Pathological Conditions, Signs and Symptoms; Neoplasms	Neoplastic Process	2825	188	0.01	0	1	0	2018	2018
PTN	5764	Colon Carcinoma	C0699790	disease	Digestive System Diseases; Neoplasms	Neoplastic Process	2832	275	0.01	1	1	0	2017	2017
PTN	5764	Stomach Carcinoma	C0699791	disease	Digestive System Diseases; Neoplasms	Neoplastic Process	3720	652	0.01	1	1	0	2017	2017
PTN	5764	Malignant Testicular Germ Cell Tumor	C0855197	disease	Neoplasms; Male Urogenital Diseases; Endocrine System Diseases	Neoplastic Process	128	62	0.01	1	1	0	2020	2020
PTN	5764	ovarian neoplasm	C0919267	disease	Neoplasms; Female Urogenital Diseases and Pregnancy Complications; Endocrine System Diseases	Neoplastic Process	2542	757	0.01	1	1	0	2015	2015
PTN	5764	Malignant neoplasm of ovary	C1140680	disease	Neoplasms; Female Urogenital Diseases and Pregnancy Complications; Endocrine System Diseases	Neoplastic Process	2563	315	0.01	1	1	0	2015	2015
PTN	5764	Precursor B-cell lymphoblastic leukemia	C1292769	disease	Neoplasms; Immune System Diseases; Hemic and Lymphatic Diseases	Neoplastic Process	478	23	0.01	1	1	0	2014	2014
PTN	5764	Anaplastic large B-cell lymphoma	C1321546	disease	Neoplasms; Immune System Diseases; Hemic and Lymphatic Diseases	Neoplastic Process	17	1	0.01	1	1	0	2018	2018
PTN	5764	Childhood Leukemia	C1332977	disease	Neoplasms	Neoplastic Process	1740	140	0.01	1	1	0	2014	2014
PTN	5764	Childhood Kidney Wilms Tumor	C1333015	disease	Congenital, Hereditary, and Neonatal Diseases and Abnormalities; Neoplasms; Female Urogenital Diseases and Pregnancy Complications; Male Urogenital Diseases	Neoplastic Process	338	36	0.01	1	1	0	1993	1993
PTN	5764	Crushing sensation	C1456399	phenotype		Sign or Symptom	10	0	0.01	1	1	0	2013	2013
PTN	5764	Mammary Neoplasms	C1458155	group	Neoplasms; Skin and Connective Tissue Diseases	Neoplastic Process	2780	385	0.01	1	1	0	2007	2007
PTN	5764	Sjogren's Syndrome	C1527336	disease	Eye Diseases; Skin and Connective Tissue Diseases; Musculoskeletal Diseases; Immune System Diseases; Stomatognathic Diseases	Disease or Syndrome	481	47	0.01	1	1	0	2017	2017
PTN	5764	tumor vasculature	C1658953	phenotype		Neoplastic Process	200	0	0.01	1	1	0	2006	2006
PTN	5764	Benign Prostatic Hyperplasia	C1704272	disease	Male Urogenital Diseases	Disease or Syndrome	770	91	0.01	1	1	0	1999	1999
PTN	5764	PIGMENTARY DISORDER, RETICULATE, WITH SYSTEMIC MANIFESTATIONS	C1845050	disease	Pathological Conditions, Signs and Symptoms; Congenital, Hereditary, and Neonatal Diseases and Abnormalities; Nutritional and Metabolic Diseases; Skin and Connective Tissue Diseases	Disease or Syndrome	209	37	0.01	1	1	0	2015	2015
PTN	5764	Hypoprebetalipoproteinemia, Acanthocytosis, Retinitis Pigmentosa, And Pallidal Degeneration	C1846582	disease	Congenital, Hereditary, and Neonatal Diseases and Abnormalities; Nervous System Diseases	Disease or Syndrome	7	5	0.01	1	1	0	2002	2002
PTN	5764	B-CELL MALIGNANCY, LOW-GRADE	C1868683	disease		Neoplastic Process	350	19	0.01	1	1	0	2014	2014
PTN	5764	Chronic total occlusion of coronary artery	C1955779	disease	Cardiovascular Diseases	Disease or Syndrome	1	0	0.01	1	1	0	2018	2018
PTN	5764	Liver carcinoma	C2239176	disease	Digestive System Diseases; Neoplasms	Neoplastic Process	5725	942	0.01	1	1	0	2017	2017
PTN	5764	Steatohepatitis	C2711227	disease	Digestive System Diseases	Disease or Syndrome	1143	75	0.01	1	1	0	2017	2017
PTN	5764	Secondary Neoplasm	C2939419	group	Pathological Conditions, Signs and Symptoms; Neoplasms	Neoplastic Process	2492	85	0.01	1	1	0	2012	2012
PTN	5764	Triple Negative Breast Neoplasms	C3539878	disease	Neoplasms; Skin and Connective Tissue Diseases	Neoplastic Process	1674	99	0.01	1	1	0	2018	2018
PTN	5764	intracranial glioma	C3665419	disease	Neoplasms; Nervous System Diseases	Neoplastic Process	108	1	0.01	1	1	0	2018	2018
PTN	5764	cervical cancer	C4048328	disease	Neoplasms; Female Urogenital Diseases and Pregnancy Complications	Neoplastic Process	1817	268	0.01	1	1	0	2003	2003
PTN	5764	Dupuytren's Disease	C4082974	disease	Neoplasms; Skin and Connective Tissue Diseases; Musculoskeletal Diseases	Disease or Syndrome	59	14	0.01	1	1	0	2004	2004
PTN	5764	Carcinoma, Ovarian Epithelial	C4721610	disease	Neoplasms; Female Urogenital Diseases and Pregnancy Complications; Endocrine System Diseases	Neoplastic Process	2841	327	0.01	1	1	0	2015	2015
PTN	5764	High grade glioma	C4722099	disease	Neoplasms	Neoplastic Process	190	15	0.01	1	1	0	2018	2018
PTN	5764	Triple-Negative Breast Carcinoma	C4722518	disease	Neoplasms; Skin and Connective Tissue Diseases	Neoplastic Process	1598	96	0.01	1	1	0	2018	2018
PTN	5764	Blood Vessel Tumors	C4722524	group	Neoplasms	Neoplastic Process	17	0	0.01	1	1	0	2009	2009
OSTN	344901	Alzheimer's Disease	C0002395	disease	Nervous System Diseases; Mental Disorders	Disease or Syndrome	3397	1843	0.01	1	1	0	2013	2013
OSTN	344901	Amyloidosis	C0002726	disease	Nutritional and Metabolic Diseases	Disease or Syndrome	694	93	0.01	1	1	0	2018	2018
OSTN	344901	Congestive heart failure	C0018802	disease	Cardiovascular Diseases	Disease or Syndrome	1760	165	0.01	1	1	0	2018	2018
OSTN	344901	Myocardial Infarction	C0027051	disease	Pathological Conditions, Signs and Symptoms; Cardiovascular Diseases	Disease or Syndrome	1800	680	0.01	1	1	0	2018	2018
OSTN	344901	LATERAL MENINGOCELE SYNDROME	C1851710	disease	Pathological Conditions, Signs and Symptoms; Congenital, Hereditary, and Neonatal Diseases and Abnormalities; Nervous System Diseases	Disease or Syndrome	118	12	0.01	1	1	0	2014	2014
OSTN	344901	LIMB-MAMMARY SYNDROME	C1863753	disease	Congenital, Hereditary, and Neonatal Diseases and Abnormalities; Musculoskeletal Diseases	Disease or Syndrome	120	1	0.01	1	1	0	2014	2014
OMG	4974	Neurofibromatosis 1	C0027831	disease	Congenital, Hereditary, and Neonatal Diseases and Abnormalities; Neoplasms; Nervous System Diseases	Neoplastic Process	311	827	0.04	1	4	0	1994	2000
OMG	4974	Multiple Sclerosis	C0026769	disease	Immune System Diseases; Nervous System Diseases	Disease or Syndrome	1800	1022	0.03	0.667	3	0	1995	2017
OMG	4974	Myasthenia Gravis, Ocular	C0751340	disease	Neoplasms; Immune System Diseases; Nervous System Diseases	Disease or Syndrome	17	0	0.03	1	3	0	2018	2020
OMG	4974	Blepharoptosis	C0005745	disease	Eye Diseases	Disease or Syndrome	595	57	0.02	1	2	0	2019	2020
OMG	4974	Ptosis	C0033377	disease	Pathological Conditions, Signs and Symptoms	Disease or Syndrome	607	12	0.02	1	2	0	2019	2020
OMG	4974	Plexiform Neurofibroma	C0206728	disease	Neoplasms; Nervous System Diseases	Neoplastic Process	46	5	0.02	1	2	0	1999	2011
OMG	4974	Autistic Disorder	C0004352	disease	Mental Disorders	Mental or Behavioral Dysfunction	1112	395	0.01	1	1	1	2003	2003
OMG	4974	Brain Neoplasms	C0006118	group	Neoplasms; Nervous System Diseases	Neoplastic Process	1018	204	0.01	1	1	0	2019	2019
OMG	4974	Demyelinating Diseases	C0011303	group	Nervous System Diseases	Disease or Syndrome	156	5	0.01	1	1	0	2017	2017
OMG	4974	Diabetes Mellitus, Non-Insulin-Dependent	C0011860	disease	Nutritional and Metabolic Diseases; Endocrine System Diseases	Disease or Syndrome	3134	2672	0.01	1	1	0	2017	2017
OMG	4974	Mental Retardation	C0025362	disease	Pathological Conditions, Signs and Symptoms; Congenital, Hereditary, and Neonatal Diseases and Abnormalities; Nervous System Diseases; Mental Disorders; Behavior and Behavior Mechanisms	Mental or Behavioral Dysfunction	505	98	0.01	1	1	0	2006	2006
OMG	4974	Neoplasms	C0027651	group	Neoplasms	Neoplastic Process	10161	1644	0.01	1	1	0	2019	2019
OMG	4974	Obesity	C0028754	disease	Pathological Conditions, Signs and Symptoms; Nutritional and Metabolic Diseases	Disease or Syndrome	2821	1111	0.01	1	1	0	2014	2014
OMG	4974	Cerebrovascular accident	C0038454	group	Nervous System Diseases; Cardiovascular Diseases	Disease or Syndrome	1658	591	0.01	1	1	0	2006	2006
OMG	4974	Thromboangiitis Obliterans	C0040021	disease	Cardiovascular Diseases	Disease or Syndrome	127	16	0.01	1	1	0	2018	2018
OMG	4974	Thyroid associated opthalmopathies	C0339143	disease	Congenital, Hereditary, and Neonatal Diseases and Abnormalities; Eye Diseases; Immune System Diseases; Endocrine System Diseases	Disease or Syndrome	211	49	0.01	1	1	0	2018	2018
OMG	4974	Middle Cerebral Artery Occlusion	C0740391	disease	Pathological Conditions, Signs and Symptoms; Nervous System Diseases; Cardiovascular Diseases	Acquired Abnormality	626	0	0.01	1	1	0	2017	2017
OMG	4974	Malignant Peripheral Nerve Sheath Tumor	C0751690	disease	Neoplasms; Nervous System Diseases	Neoplastic Process	261	19	0.01	1	1	0	2011	2011
OMG	4974	Multiple Sclerosis, Primary Progressive	C0751964	disease	Immune System Diseases; Nervous System Diseases	Disease or Syndrome	37	2	0.01	1	1	0	2000	2000
OMG	4974	Myasthenias	C0947912	disease	Pathological Conditions, Signs and Symptoms; Musculoskeletal Diseases; Nervous System Diseases	Disease or Syndrome	41	3	0.01	1	1	0	2020	2020
OMG	4974	Glut1 Deficiency Syndrome	C1847501	disease	Congenital, Hereditary, and Neonatal Diseases and Abnormalities; Nutritional and Metabolic Diseases	Disease or Syndrome	10	7	0.01	1	1	0	2011	2011
OMG	4974	Intellectual Disability	C3714756	group	Pathological Conditions, Signs and Symptoms; Nervous System Diseases; Mental Disorders; Behavior and Behavior Mechanisms	Mental or Behavioral Dysfunction	2165	159	0.01	1	1	0	2006	2006
NRN1L	123904	Triglycerides measurement	C0202236	phenotype		Laboratory Procedure	563	1418	0.1	1	1	1	2009	2009
NRN1L	123904	Corpuscular Hemoglobin Concentration Mean	C4528257	phenotype		Laboratory or Test Result	401	4389	0.1	1	1	1	2012	2012
NRN1L	123904	Seizures	C0036572	phenotype	Pathological Conditions, Signs and Symptoms; Nervous System Diseases	Sign or Symptom	2152	553	0.01	1	1	0	2008	2008
NRN1	51299	Schizophrenia	C0036341	disease	Mental Disorders	Mental or Behavioral Dysfunction	2872	2897	0.34	1	4	0	2010	2017
NRN1	51299	Impaired cognition	C0338656	disease	Mental Disorders	Mental or Behavioral Dysfunction	1630	348	0.03	1	3	0	2010	2015
NRN1	51299	Alzheimer's Disease	C0002395	disease	Nervous System Diseases; Mental Disorders	Disease or Syndrome	3397	1843	0.02	1	2	0	2014	2019
NRN1	51299	Neoplasms	C0027651	group	Neoplasms	Neoplastic Process	10161	1644	0.02	1	2	0	2005	2006
NRN1	51299	Bipolar Disorder	C0005586	disease	Mental Disorders	Mental or Behavioral Dysfunction	1183	839	0.01	1	1	0	2016	2016
NRN1	51299	Borderline Personality Disorder	C0006012	disease	Mental Disorders	Mental or Behavioral Dysfunction	221	82	0.01	1	1	0	2016	2016
NRN1	51299	Bronchopulmonary Dysplasia	C0006287	disease	Congenital, Hereditary, and Neonatal Diseases and Abnormalities; Respiratory Tract Diseases	Disease or Syndrome	423	112	0.01	1	1	0	2016	2016
NRN1	51299	Malignant Neoplasms	C0006826	group	Neoplasms	Neoplastic Process	8621	1641	0.01	1	1	0	2006	2006
NRN1	51299	Non-Small Cell Lung Carcinoma	C0007131	disease	Neoplasms; Respiratory Tract Diseases	Neoplastic Process	3926	712	0.01	1	1	0	2019	2019
NRN1	51299	Cognition Disorders	C0009241	group	Mental Disorders	Mental or Behavioral Dysfunction	607	47	0.01	1	1	0	2010	2010
NRN1	51299	Depressive disorder	C0011581	disease	Mental Disorders	Mental or Behavioral Dysfunction	1719	297	0.01	1	1	0	2017	2017
NRN1	51299	Endometriosis	C0014175	disease	Female Urogenital Diseases and Pregnancy Complications	Disease or Syndrome	1188	274	0.01	1	1	0	2019	2019
NRN1	51299	Hyperglycemia	C0020456	disease	Nutritional and Metabolic Diseases	Disease or Syndrome	1098	108	0.01	1	1	0	2018	2018
NRN1	51299	melanoma	C0025202	disease	Neoplasms	Neoplastic Process	3087	515	0.01	1	1	0	2017	2017
NRN1	51299	Seizures	C0036572	phenotype	Pathological Conditions, Signs and Symptoms; Nervous System Diseases	Sign or Symptom	2152	553	0.01	1	1	0	2014	2014
NRN1	51299	Subarachnoid Hemorrhage	C0038525	disease	Pathological Conditions, Signs and Symptoms; Nervous System Diseases; Cardiovascular Diseases	Disease or Syndrome	501	26	0.01	1	1	0	2017	2017
NRN1	51299	Depressive Symptoms	C0086132	phenotype	Behavior and Behavior Mechanisms	Sign or Symptom	421	120	0.01	1	1	1	2017	2017
NRN1	51299	Endometriosis of ovary	C0156344	disease	Female Urogenital Diseases and Pregnancy Complications; Endocrine System Diseases	Disease or Syndrome	70	3	0.01	1	1	0	2019	2019
NRN1	51299	Neurodegenerative Disorders	C0524851	group	Nervous System Diseases	Disease or Syndrome	1515	85	0.01	1	1	0	2018	2018
NRN1	51299	Primary malignant neoplasm	C1306459	group	Neoplasms	Neoplastic Process	8221	1374	0.01	1	1	0	2006	2006
NRN1	51299	Speech Sound Disorders	C4019167	disease	Mental Disorders	Mental or Behavioral Dysfunction	11	0	0.01	1	1	0	2016	2016
MYOC	4653	GLAUCOMA 1, OPEN ANGLE, A	C1842028	disease	Eye Diseases	Disease or Syndrome	4	38	0.72	1	38	37	1996	2015
MYOC	4653	Glaucoma	C0017601	disease	Eye Diseases	Disease or Syndrome	770	198	0.7	0.979	146	21	1995	2019
MYOC	4653	Glaucoma, Open-Angle	C0017612	disease	Eye Diseases	Disease or Syndrome	130	236	0.7	0.987	76	6	1996	2019
MYOC	4653	Glaucoma, Primary Open Angle	C0339573	disease	Eye Diseases	Disease or Syndrome	383	222	0.5	0.983	178	27	1996	2019
MYOC	4653	GLAUCOMA 3, PRIMARY CONGENITAL, A	C1856439	disease	Eye Diseases	Disease or Syndrome; Congenital Abnormality	3	34	0.5	1	1	1	2005	2005
MYOC	4653	Hydrophthalmos	C0020302	disease	Congenital, Hereditary, and Neonatal Diseases and Abnormalities; Eye Diseases	Congenital Abnormality	60	11	0.4	1	13	1	1996	2013
MYOC	4653	Ocular Hypertension	C0028840	disease	Eye Diseases	Disease or Syndrome	103	8	0.4	0.769	13	3	1997	2017
MYOC	4653	Glaucoma of childhood	C2981140	disease	Eye Diseases	Disease or Syndrome	30	15	0.4	1	10	1	1996	2012
MYOC	4653	Disorder of eye	C0015397	group	Eye Diseases	Disease or Syndrome	400	14	0.33	1	3	0	2002	2019
MYOC	4653	Liver Cirrhosis, Experimental	C0023893	disease	Pathological Conditions, Signs and Symptoms; Digestive System Diseases	Experimental Model of Disease	870	0	0.3	1	1	0	2014	2014
MYOC	4653	Secondary Open Angle Glaucoma	C0271148	disease	Eye Diseases	Disease or Syndrome	13	0	0.3	1	1	0	2011	2011
MYOC	4653	Glomerulonephritis, Membranoproliferative	C0017662	disease	Female Urogenital Diseases and Pregnancy Complications; Male Urogenital Diseases; Immune System Diseases	Disease or Syndrome	57	3	0.2	1	1	0	2005	2005
MYOC	4653	Severe myopia	C0271183	disease	Eye Diseases	Disease or Syndrome	184	116	0.15	0.8	5	0	2007	2014
MYOC	4653	Disorder of the optic nerve	C0029132	group	Eye Diseases; Nervous System Diseases	Disease or Syndrome	112	2	0.12	1	2	0	1997	2012
MYOC	4653	Unspecified visual loss	C3665346	phenotype	Pathological Conditions, Signs and Symptoms; Eye Diseases	Sign or Symptom	235	11	0.12	1	2	0	2014	2015
MYOC	4653	Immunologic Deficiency Syndromes	C0021051	group	Immune System Diseases	Disease or Syndrome	973	31	0.1		0	1
MYOC	4653	Lymphopenia	C0024312	disease	Immune System Diseases; Hemic and Lymphatic Diseases	Disease or Syndrome	239	16	0.1		0	1
MYOC	4653	Myopia	C0027092	disease	Eye Diseases	Disease or Syndrome	490	167	0.1		0	0
MYOC	4653	Retinal Artery Occlusion	C0035302	disease	Eye Diseases; Cardiovascular Diseases	Disease or Syndrome	9	1	0.1		0	0
MYOC	4653	Retinal Detachment	C0035305	disease	Eye Diseases	Disease or Syndrome	148	10	0.1		0	0
MYOC	4653	Retinal Vein Occlusion	C0035328	disease	Eye Diseases; Cardiovascular Diseases	Disease or Syndrome	76	15	0.1		0	1
MYOC	4653	Severe Combined Immunodeficiency	C0085110	disease	Congenital, Hereditary, and Neonatal Diseases and Abnormalities; Nutritional and Metabolic Diseases; Immune System Diseases	Disease or Syndrome	284	46	0.1		0	1
MYOC	4653	Scotoma, Central	C0152191	phenotype	Pathological Conditions, Signs and Symptoms; Eye Diseases; Nervous System Diseases	Finding	43	2	0.1		0	0
MYOC	4653	Port-Wine Stain	C0235752	disease	Congenital, Hereditary, and Neonatal Diseases and Abnormalities; Skin and Connective Tissue Diseases	Congenital Abnormality	46	10	0.1		0	0
MYOC	4653	Peripheral visual field loss	C0241688	phenotype		Finding	19	4	0.1		0	0
MYOC	4653	Temporal pallor of optic disc	C0344299	disease	Eye Diseases; Nervous System Diseases	Disease or Syndrome	5	0	0.1		0	0
MYOC	4653	Combined immunodeficiency	C0494261	disease	Congenital, Hereditary, and Neonatal Diseases and Abnormalities; Nutritional and Metabolic Diseases; Immune System Diseases	Disease or Syndrome	86	11	0.1		0	1
MYOC	4653	Intraocular pressure disorder	C0595921	disease	Eye Diseases	Disease or Syndrome	304	56	0.1	0.944	36	6	1996	2019
MYOC	4653	Glaucomatous visual field defect	C1299694	phenotype		Finding	3	0	0.1		0	0
MYOC	4653	Primary congenital glaucoma	C1533041	disease	Congenital, Hereditary, and Neonatal Diseases and Abnormalities; Eye Diseases; Nervous System Diseases	Disease or Syndrome	24	25	0.1	0.929	14	2	2004	2016
MYOC	4653	GLAUCOMA 3, PRIMARY CONGENITAL, A, DIGENIC	C1866550	disease		Finding	1	1	0.1		0	1
MYOC	4653	Anterior chamber anomalies	C3152182	phenotype	Congenital, Hereditary, and Neonatal Diseases and Abnormalities; Eye Diseases	Congenital Abnormality	18	1	0.1		0	0
MYOC	4653	Abnormal iris vasculature	C3275963	phenotype		Finding	2	0	0.1		0	0
MYOC	4653	Visual Impairment	C3665347	phenotype	Pathological Conditions, Signs and Symptoms; Eye Diseases; Nervous System Diseases	Finding	422	0	0.1		0	0
MYOC	4653	Abnormal vision	C3665386	phenotype	Pathological Conditions, Signs and Symptoms; Eye Diseases; Nervous System Diseases	Finding	115	6	0.1		0	0
MYOC	4653	Increased cup-to-disc ratio	C3805911	phenotype		Finding	4	1	0.1		0	0
MYOC	4653	GLAUCOMA 1, OPEN ANGLE, A, DIGENIC	C4016750	disease		Finding	2	1	0.1		0	1
MYOC	4653	Abnormality of T cell physiology	C4023166	phenotype		Pathologic Function	6	3	0.1		0	1
MYOC	4653	Abnormality of cellular immune system	C4023612	phenotype		Anatomical Abnormality	4	3	0.1		0	1
MYOC	4653	Abnormality iris morphology	C4025845	disease		Anatomical Abnormality	27	0	0.1		0	0
MYOC	4653	Juvenile open angle	C4068743	disease		Disease or Syndrome	7	1	0.1	1	17	1	1997	2018
MYOC	4653	Low Tension Glaucoma	C0152136	disease	Eye Diseases	Disease or Syndrome	103	56	0.07	0.857	7	4	2001	2019
MYOC	4653	Familial (FPAH)	C1611743	disease		Disease or Syndrome	1075	276	0.07	0.857	7	0	1997	2019
MYOC	4653	Blindness	C0456909	phenotype	Pathological Conditions, Signs and Symptoms; Eye Diseases; Nervous System Diseases	Disease or Syndrome	393	34	0.04	1	4	0	2013	2018
MYOC	4653	Early-Onset Glaucoma	C3711383	disease	Eye Diseases	Disease or Syndrome	15	1	0.03	1	3	0	2001	2019
MYOC	4653	Corticosteroid-induced glaucoma	C0339578	disease	Eye Diseases	Disease or Syndrome	6	0	0.02	0.5	2	0	2004	2004
MYOC	4653	Aqueous Humor Disorders	C0595936	disease	Eye Diseases	Disease or Syndrome	85	1	0.02	1	2	0	2013	2018
MYOC	4653	Chronic open angle glaucoma	C0857070	disease	Eye Diseases	Disease or Syndrome	6	0	0.02	1	2	0	1995	1997
MYOC	4653	Optic Neuropathy	C3887709	disease	Eye Diseases; Nervous System Diseases	Disease or Syndrome	54	8	0.02	1	2	0	1997	2012
MYOC	4653	Amyloidosis	C0002726	disease	Nutritional and Metabolic Diseases	Disease or Syndrome	694	93	0.01	1	1	0	2014	2014
MYOC	4653	Malignant Neoplasms	C0006826	group	Neoplasms	Neoplastic Process	8621	1641	0.01	1	1	0	2012	2012
MYOC	4653	Angle Closure Glaucoma	C0017605	disease	Eye Diseases	Disease or Syndrome	94	56	0.01	1	1	3	2015	2015
MYOC	4653	Primary angle-closure glaucoma	C0017606	disease	Eye Diseases	Disease or Syndrome	87	55	0.01	1	1	3	2015	2015
MYOC	4653	Heart failure	C0018801	disease	Cardiovascular Diseases	Disease or Syndrome	1499	201	0.01	1	1	0	2019	2019
MYOC	4653	Congestive heart failure	C0018802	disease	Cardiovascular Diseases	Disease or Syndrome	1760	165	0.01	1	1	0	2019	2019
MYOC	4653	Hypertensive disease	C0020538	group	Cardiovascular Diseases	Disease or Syndrome	2322	1085	0.01	1	1	1	2015	2015
MYOC	4653	Nephrosis	C0027720	disease	Female Urogenital Diseases and Pregnancy Complications; Male Urogenital Diseases	Disease or Syndrome	68	0	0.01	1	1	0	2011	2011
MYOC	4653	Nephrotic Syndrome	C0027726	group	Female Urogenital Diseases and Pregnancy Complications; Male Urogenital Diseases	Disease or Syndrome	384	45	0.01	1	1	0	2011	2011
MYOC	4653	Neurilemmoma	C0027809	disease	Neoplasms	Neoplastic Process	193	11	0.01	1	1	0	2003	2003
MYOC	4653	Parkinson Disease	C0030567	disease	Nervous System Diseases	Disease or Syndrome	2078	990	0.01	1	1	1	2007	2007
MYOC	4653	Refractive Errors	C0034951	group	Eye Diseases	Disease or Syndrome	71	75	0.01	1	1	0	2018	2018
MYOC	4653	Low Vision	C0042798	disease	Pathological Conditions, Signs and Symptoms; Eye Diseases; Nervous System Diseases	Disease or Syndrome	157	51	0.01	1	1	0	2007	2007
MYOC	4653	Synovial Cyst	C0085648	disease	Neoplasms	Disease or Syndrome	87	0	0.01	1	1	0	2005	2005
MYOC	4653	Glomerulosclerosis (disorder)	C0178664	disease	Female Urogenital Diseases and Pregnancy Complications; Male Urogenital Diseases; Cardiovascular Diseases	Disease or Syndrome	221	3	0.01	1	1	0	2005	2005
MYOC	4653	Fibrosis, Liver	C0239946	disease	Pathological Conditions, Signs and Symptoms; Digestive System Diseases	Disease or Syndrome	1179	64	0.01	1	1	0	2014	2014
MYOC	4653	Coloboma of iris	C0240063	disease	Congenital, Hereditary, and Neonatal Diseases and Abnormalities; Eye Diseases	Anatomical Abnormality	153	12	0.01	1	1	0	2006	2006
MYOC	4653	Glaucomatous atrophy of optic disc	C0271342	disease	Eye Diseases; Nervous System Diseases	Disease or Syndrome	1	1	0.01	0	1	1	1999	1999
MYOC	4653	Goniodysgenesis	C0311237	disease		Congenital Abnormality	6	3	0.01	1	1	1	2009	2009
MYOC	4653	Glaucoma due to combination of mechanisms	C0339576	disease	Eye Diseases	Disease or Syndrome	1	0	0.01	1	1	0	2002	2002
MYOC	4653	Neurodegenerative Disorders	C0524851	group	Nervous System Diseases	Disease or Syndrome	1515	85	0.01	1	1	0	2003	2003
MYOC	4653	Chronic primary angle closure glaucoma	C0543991	disease	Eye Diseases	Disease or Syndrome	9	0	0.01	1	1	0	2005	2005
MYOC	4653	Glaucoma and ocular hypertension	C0851409	disease	Eye Diseases	Disease or Syndrome	10	1	0.01	1	1	1	1997	1997
MYOC	4653	Myxoid cyst	C1258666	disease	Neoplasms; Skin and Connective Tissue Diseases	Disease or Syndrome	106	0	0.01	1	1	0	2005	2005
MYOC	4653	Primary malignant neoplasm	C1306459	group	Neoplasms	Neoplastic Process	8221	1374	0.01	1	1	0	2012	2012
MYOC	4653	Mesangioproliferative glomerulonephritis	C1737225	disease		Disease or Syndrome	21	0	0.01	1	1	0	2005	2005
MYOC	4653	Protein Misfolding Disorders	C2718001	disease	Nutritional and Metabolic Diseases	Disease or Syndrome	38	1	0.01	1	1	0	2011	2011
MYOC	4653	Axenfeld-Rieger syndrome	C3495488	disease	Congenital, Hereditary, and Neonatal Diseases and Abnormalities; Eye Diseases	Disease or Syndrome	22	7	0.01	1	1	0	2013	2013
MYOC	4653	AL-RAQAD SYNDROME	C4085595	disease		Disease or Syndrome	17	8	0.01	1	1	0	2013	2013
MYOC	4653	Abnormal cell morphology	C4476793	phenotype		Anatomical Abnormality	12	1	0.01	1	1	1	2004	2004
MDK	4192	Schizophrenia	C0036341	disease	Mental Disorders	Mental or Behavioral Dysfunction	2872	2897	0.62	1	8	1	2004	2019
MDK	4192	Glioma	C0017638	disease	Neoplasms	Neoplastic Process	3097	353	0.34	1	5	0	2004	2019
MDK	4192	Malignant mesothelioma	C0345967	disease	Neoplasms; Respiratory Tract Diseases	Neoplastic Process	420	12	0.33	1	4	0	2010	2017
MDK	4192	Diabetic Nephropathy	C0011881	disease	Female Urogenital Diseases and Pregnancy Complications; Male Urogenital Diseases; Endocrine System Diseases	Disease or Syndrome	1189	238	0.31	1	1	0	2007	2007
MDK	4192	Malignant Glioma	C0555198	disease	Neoplasms	Neoplastic Process	724	22	0.31	1	2	0	2004	2011
MDK	4192	Anxiety Disorders	C0003469	group	Mental Disorders	Mental or Behavioral Dysfunction	840	163	0.3	1	1	0	2009	2009
MDK	4192	Nodular glomerulosclerosis	C0017667	disease	Female Urogenital Diseases and Pregnancy Complications; Male Urogenital Diseases; Endocrine System Diseases	Disease or Syndrome	59	0	0.3	1	1	0	2007	2007
MDK	4192	Memory Disorders	C0025261	disease	Pathological Conditions, Signs and Symptoms; Nervous System Diseases; Behavior and Behavior Mechanisms	Mental or Behavioral Dysfunction	62	0	0.3	1	1	0	2009	2009
MDK	4192	Memory impairment	C0233794	phenotype	Pathological Conditions, Signs and Symptoms; Nervous System Diseases; Behavior and Behavior Mechanisms	Mental or Behavioral Dysfunction	763	48	0.3	1	1	0	2009	2009
MDK	4192	mixed gliomas	C0259783	disease	Neoplasms	Neoplastic Process	76	0	0.3	1	1	0	2011	2011
MDK	4192	Anxiety States, Neurotic	C0376280	disease	Mental Disorders	Mental or Behavioral Dysfunction	44	0	0.3	1	1	0	2009	2009
MDK	4192	Age-Related Memory Disorders	C0751292	group	Pathological Conditions, Signs and Symptoms; Nervous System Diseases; Behavior and Behavior Mechanisms	Mental or Behavioral Dysfunction	43	0	0.3	1	1	0	2009	2009
MDK	4192	Memory Disorder, Semantic	C0751293	phenotype	Pathological Conditions, Signs and Symptoms; Nervous System Diseases; Behavior and Behavior Mechanisms	Mental or Behavioral Dysfunction	43	0	0.3	1	1	0	2009	2009
MDK	4192	Memory Disorder, Spatial	C0751294	phenotype	Pathological Conditions, Signs and Symptoms; Nervous System Diseases; Behavior and Behavior Mechanisms	Mental or Behavioral Dysfunction	43	0	0.3	1	1	0	2009	2009
MDK	4192	Memory Loss	C0751295	phenotype	Pathological Conditions, Signs and Symptoms; Nervous System Diseases; Behavior and Behavior Mechanisms	Sign or Symptom	163	10	0.3	1	1	0	2009	2009
MDK	4192	Anxiety neurosis (finding)	C1279420	disease	Mental Disorders	Mental or Behavioral Dysfunction	75	5	0.3	1	1	0	2009	2009
MDK	4192	Myocardial Infarction	C0027051	disease	Pathological Conditions, Signs and Symptoms; Cardiovascular Diseases	Disease or Syndrome	1800	680	0.21	1	2	0	1998	2009
MDK	4192	Experimental Autoimmune Encephalomyelitis	C0014072	disease	Immune System Diseases; Nervous System Diseases	Experimental Model of Disease	97	0	0.2	1	1	0	1998	1998
MDK	4192	Coronary Stenosis	C0242231	disease	Cardiovascular Diseases	Disease or Syndrome	111	20	0.2	1	1	0	2000	2000
MDK	4192	Brain Infarction	C0751955	disease	Pathological Conditions, Signs and Symptoms; Nervous System Diseases; Cardiovascular Diseases	Disease or Syndrome	114	11	0.2	1	1	0	2004	2004
MDK	4192	Malignant Neoplasms	C0006826	group	Neoplasms	Neoplastic Process	8621	1641	0.1	0.974	39	0	1996	2020
MDK	4192	Child Development Disorders, Pervasive	C0008074	group	Mental Disorders	Mental or Behavioral Dysfunction	168	379	0.1	1	1	1	2017	2017
MDK	4192	Neoplasm Metastasis	C0027627	phenotype	Pathological Conditions, Signs and Symptoms; Neoplasms	Neoplastic Process	6385	327	0.1	1	11	0	1998	2020
MDK	4192	Neoplasms	C0027651	group	Neoplasms	Neoplastic Process	10161	1644	0.1	0.913	46	0	1993	2019
MDK	4192	Carcinogenesis	C0596263	phenotype	Pathological Conditions, Signs and Symptoms; Neoplasms	Neoplastic Process	6243	355	0.1	0.955	22	0	1996	2020
MDK	4192	Primary malignant neoplasm	C1306459	group	Neoplasms	Neoplastic Process	8221	1374	0.1	1	21	0	2005	2020
MDK	4192	Liver carcinoma	C2239176	disease	Digestive System Diseases; Neoplasms	Neoplastic Process	5725	942	0.1	1	18	0	1993	2020
MDK	4192	Carcinoma	C0007097	group	Neoplasms	Neoplastic Process	2462	103	0.08	0.875	8	0	1993	2017
MDK	4192	Tumor Cell Invasion	C1269955	phenotype		Neoplastic Process	6626	169	0.08	1	8	0	2000	2016
MDK	4192	Neuroblastoma	C0027819	disease	Neoplasms	Neoplastic Process	2509	386	0.07	1	7	0	2000	2015
MDK	4192	Pancreatic carcinoma	C0235974	disease	Digestive System Diseases; Neoplasms; Endocrine System Diseases	Neoplastic Process	2689	322	0.07	1	7	0	2001	2015
MDK	4192	Central neuroblastoma	C0700095	disease	Neoplasms; Nervous System Diseases	Neoplastic Process	2419	231	0.07	1	7	0	2000	2015
MDK	4192	Childhood Neuroblastoma	C4086165	disease	Neoplasms	Neoplastic Process	2420	231	0.07	1	7	0	2000	2015
MDK	4192	Rheumatoid Arthritis	C0003873	disease	Skin and Connective Tissue Diseases; Musculoskeletal Diseases; Immune System Diseases	Disease or Syndrome	2723	2387	0.06	1	6	0	2004	2020
MDK	4192	Squamous cell carcinoma	C0007137	disease	Neoplasms	Neoplastic Process	2507	257	0.06	1	6	0	2003	2017
MDK	4192	Herpes Simplex Infections	C0019348	group	Infections; Skin and Connective Tissue Diseases	Disease or Syndrome	645	11	0.06	1	6	0	1999	2006
MDK	4192	Malignant neoplasm of stomach	C0024623	disease	Digestive System Diseases; Neoplasms	Neoplastic Process	3806	615	0.06	1	6	0	1998	2017
MDK	4192	Malignant neoplasm of pancreas	C0346647	disease	Digestive System Diseases; Neoplasms; Endocrine System Diseases	Neoplastic Process	2667	277	0.06	1	6	0	2001	2014
MDK	4192	Secondary Neoplasm	C2939419	group	Pathological Conditions, Signs and Symptoms; Neoplasms	Neoplastic Process	2492	85	0.06	1	6	0	1998	2018
MDK	4192	Non-Small Cell Lung Carcinoma	C0007131	disease	Neoplasms; Respiratory Tract Diseases	Neoplastic Process	3926	712	0.05	1	5	0	2012	2018
MDK	4192	Glioblastoma	C0017636	disease	Neoplasms	Neoplastic Process	3177	281	0.05	1	5	0	1999	2019
MDK	4192	Kidney Failure, Acute	C0022660	disease	Female Urogenital Diseases and Pregnancy Complications; Male Urogenital Diseases	Disease or Syndrome	826	32	0.05	1	5	0	2017	2020
MDK	4192	Malignant neoplasm of prostate	C0376358	disease	Neoplasms; Male Urogenital Diseases	Neoplastic Process	4502	1082	0.05	0.8	5	0	2006	2020
MDK	4192	Prostate carcinoma	C0600139	disease	Neoplasms; Male Urogenital Diseases	Neoplastic Process	4388	1168	0.05	0.8	5	0	2006	2020
MDK	4192	Secondary malignant neoplasm of lymph node	C0686619	disease	Pathological Conditions, Signs and Symptoms; Neoplasms	Neoplastic Process	2825	188	0.05	1	5	0	1998	2017
MDK	4192	Colorectal Carcinoma	C0009402	disease	Digestive System Diseases; Neoplasms	Neoplastic Process	5473	1962	0.04	1	4	0	1996	2017
MDK	4192	Nephroblastoma	C0027708	disease	Congenital, Hereditary, and Neonatal Diseases and Abnormalities; Neoplasms; Female Urogenital Diseases and Pregnancy Complications; Male Urogenital Diseases	Neoplastic Process	586	125	0.04	1	4	0	1993	2000
MDK	4192	Tumor Progression	C0178874	phenotype	Pathological Conditions, Signs and Symptoms	Neoplastic Process	3865	72	0.04	1	4	0	2012	2020
MDK	4192	Papillary thyroid carcinoma	C0238463	disease	Neoplasms; Endocrine System Diseases	Neoplastic Process	1348	204	0.04	1	4	0	2000	2018
MDK	4192	Breast Carcinoma	C0678222	disease	Neoplasms; Skin and Connective Tissue Diseases	Neoplastic Process	6776	2793	0.04	1	4	0	1994	2015
MDK	4192	Stomach Carcinoma	C0699791	disease	Digestive System Diseases; Neoplasms	Neoplastic Process	3720	652	0.04	1	4	0	2007	2017
MDK	4192	Carcinoma of bladder	C0699885	disease	Neoplasms; Female Urogenital Diseases and Pregnancy Complications; Male Urogenital Diseases	Neoplastic Process	2104	309	0.04	1	4	0	1996	2007
MDK	4192	Childhood Kidney Wilms Tumor	C1333015	disease	Congenital, Hereditary, and Neonatal Diseases and Abnormalities; Neoplasms; Female Urogenital Diseases and Pregnancy Complications; Male Urogenital Diseases	Neoplastic Process	338	36	0.04	1	4	0	1993	2000
MDK	4192	Glioblastoma Multiforme	C1621958	disease	Neoplasms	Neoplastic Process	3197	186	0.04	1	4	0	2005	2019
MDK	4192	Malignant neoplasm of colon and/or rectum	C4722085	disease		Neoplastic Process	3669	502	0.04	1	4	0	1996	2017
MDK	4192	Malignant neoplasm of urinary bladder	C0005684	disease	Neoplasms; Female Urogenital Diseases and Pregnancy Complications; Male Urogenital Diseases	Neoplastic Process	2113	316	0.03	1	3	0	1996	2007
MDK	4192	Bladder Neoplasm	C0005695	disease	Neoplasms; Female Urogenital Diseases and Pregnancy Complications; Male Urogenital Diseases	Neoplastic Process	2130	281	0.03	1	3	0	1996	2007
MDK	4192	Malignant neoplasm of breast	C0006142	disease	Neoplasms; Skin and Connective Tissue Diseases	Neoplastic Process	6941	3417	0.03	1	3	0	2004	2015
MDK	4192	Endometriosis	C0014175	disease	Female Urogenital Diseases and Pregnancy Complications	Disease or Syndrome	1188	274	0.03	0.667	3	0	2002	2016
MDK	4192	neurofibroma	C0027830	disease	Neoplasms; Nervous System Diseases	Neoplastic Process	125	5	0.03	1	3	0	1999	2002
MDK	4192	Neurofibromatosis 1	C0027831	disease	Congenital, Hereditary, and Neonatal Diseases and Abnormalities; Neoplasms; Nervous System Diseases	Neoplastic Process	311	827	0.03	1	3	0	1999	2004
MDK	4192	Neurofibromatoses	C0162678	group	Congenital, Hereditary, and Neonatal Diseases and Abnormalities; Neoplasms; Nervous System Diseases	Neoplastic Process	135	16	0.03	1	3	0	1999	2002
MDK	4192	Adult Glioblastoma	C0278878	disease	Neoplasms	Neoplastic Process	2528	98	0.03	1	3	0	2005	2013
MDK	4192	Childhood Glioblastoma	C0280474	disease	Neoplasms	Neoplastic Process	2527	98	0.03	1	3	0	2005	2013
MDK	4192	Malignant Peripheral Nerve Sheath Tumor	C0751690	disease	Neoplasms; Nervous System Diseases	Neoplastic Process	261	19	0.03	0.667	3	0	2001	2010
MDK	4192	ovarian neoplasm	C0919267	disease	Neoplasms; Female Urogenital Diseases and Pregnancy Complications; Endocrine System Diseases	Neoplastic Process	2542	757	0.03	1	3	0	1997	2012
MDK	4192	Acute pancreatitis	C0001339	disease	Digestive System Diseases	Disease or Syndrome	435	51	0.02	1	2	0	2017	2017
MDK	4192	Adenocarcinoma	C0001418	group	Neoplasms	Neoplastic Process	2235	168	0.02	1	2	0	2014	2018
MDK	4192	Malignant tumor of cervix	C0007847	disease	Neoplasms; Female Urogenital Diseases and Pregnancy Complications	Neoplastic Process	1718	245	0.02	1	2	0	2003	2004
MDK	4192	Ulcerative Colitis	C0009324	disease	Digestive System Diseases	Disease or Syndrome	1458	827	0.02	1	2	0	2017	2019
MDK	4192	Crohn Disease	C0010346	disease	Digestive System Diseases	Disease or Syndrome	1382	1147	0.02	1	2	0	2017	2019
MDK	4192	Esophageal Neoplasms	C0014859	group	Digestive System Diseases; Neoplasms	Neoplastic Process	1254	270	0.02	1	2	0	1999	2003
MDK	4192	Hypertensive disease	C0020538	group	Cardiovascular Diseases	Disease or Syndrome	2322	1085	0.02	1	2	0	2010	2018
MDK	4192	Acute lymphocytic leukemia	C0023449	disease	Neoplasms; Immune System Diseases; Hemic and Lymphatic Diseases	Neoplastic Process	1293	222	0.02	1	2	0	2007	2010
MDK	4192	Lupus Erythematosus, Systemic	C0024141	disease	Skin and Connective Tissue Diseases; Immune System Diseases	Disease or Syndrome	1883	1172	0.02	1	2	0	2017	2019
MDK	4192	melanoma	C0025202	disease	Neoplasms	Neoplastic Process	3087	515	0.02	1	2	0	2017	2017
MDK	4192	Mesothelioma	C0025500	disease	Neoplasms	Neoplastic Process	560	4	0.02	1	2	0	2010	2017
MDK	4192	Obesity	C0028754	disease	Pathological Conditions, Signs and Symptoms; Nutritional and Metabolic Diseases	Disease or Syndrome	2821	1111	0.02	0.5	2	0	2019	2020
MDK	4192	Osteosarcoma	C0029463	disease	Neoplasms	Neoplastic Process	2283	178	0.02	1	2	0	2012	2014
MDK	4192	Acute leukemia	C0085669	disease	Pathological Conditions, Signs and Symptoms; Neoplasms	Neoplastic Process	639	50	0.02	1	2	0	2007	2009
MDK	4192	Malignant neoplasm of lung	C0242379	disease	Neoplasms; Respiratory Tract Diseases	Neoplastic Process	4173	1142	0.02	1	2	0	1993	2013
MDK	4192	Squamous cell carcinoma of esophagus	C0279626	disease	Digestive System Diseases; Neoplasms	Neoplastic Process	2053	329	0.02	0.5	2	0	2006	2019
MDK	4192	Solid Neoplasm	C0280100	phenotype	Neoplasms	Neoplastic Process	1145	24	0.02	1	2	0	2000	2018
MDK	4192	Cervix carcinoma	C0302592	disease	Neoplasms; Female Urogenital Diseases and Pregnancy Complications	Neoplastic Process	1881	283	0.02	1	2	0	2003	2004
MDK	4192	Neurodegenerative Disorders	C0524851	group	Nervous System Diseases	Disease or Syndrome	1515	85	0.02	1	2	0	2018	2019
MDK	4192	Osteosarcoma of bone	C0585442	disease	Neoplasms	Neoplastic Process	2247	151	0.02	1	2	0	2012	2014
MDK	4192	Carcinoma of lung	C0684249	disease	Neoplasms; Respiratory Tract Diseases	Neoplastic Process	4081	1204	0.02	1	2	0	1999	2013
MDK	4192	Colon Carcinoma	C0699790	disease	Digestive System Diseases; Neoplasms	Neoplastic Process	2832	275	0.02	1	2	0	2004	2005
MDK	4192	precancerous lesions	C0940937	phenotype		Neoplastic Process	270	19	0.02	1	2	0	2007	2013
MDK	4192	Malignant neoplasm of ovary	C1140680	disease	Neoplasms; Female Urogenital Diseases and Pregnancy Complications; Endocrine System Diseases	Neoplastic Process	2563	315	0.02	1	2	0	2001	2012
MDK	4192	Childhood Osteosarcoma	C1332986	disease	Neoplasms	Neoplastic Process	2208	151	0.02	1	2	0	2012	2014
MDK	4192	Tumor Angiogenesis	C1519670	phenotype	Pathological Conditions, Signs and Symptoms	Neoplastic Process	822	5	0.02	1	2	0	2006	2010
MDK	4192	Sjogren's Syndrome	C1527336	disease	Eye Diseases; Skin and Connective Tissue Diseases; Musculoskeletal Diseases; Immune System Diseases; Stomatognathic Diseases	Disease or Syndrome	481	47	0.02	1	2	0	2017	2019
MDK	4192	ANOPHTHALMIA AND PULMONARY HYPOPLASIA	C1832661	disease	Congenital, Hereditary, and Neonatal Diseases and Abnormalities; Eye Diseases; Respiratory Tract Diseases	Disease or Syndrome	1410	80	0.02	1	2	0	2011	2014
MDK	4192	Precursor Cell Lymphoblastic Leukemia Lymphoma	C1961102	disease	Neoplasms; Immune System Diseases; Hemic and Lymphatic Diseases	Neoplastic Process	879	168	0.02	1	2	0	2007	2010
MDK	4192	PACHYONYCHIA CONGENITA 3	C3714948	disease		Disease or Syndrome	209	20	0.02	1	2	0	2006	2006
MDK	4192	cervical cancer	C4048328	disease	Neoplasms; Female Urogenital Diseases and Pregnancy Complications	Neoplastic Process	1817	268	0.02	1	2	0	2003	2004
MDK	4192	Carcinoma, Ovarian Epithelial	C4721610	disease	Neoplasms; Female Urogenital Diseases and Pregnancy Complications; Endocrine System Diseases	Neoplastic Process	2841	327	0.02	1	2	0	2001	2012
MDK	4192	Adenoma	C0001430	group	Neoplasms	Neoplastic Process	1183	103	0.01	1	1	0	1999	1999
MDK	4192	Anorexia Nervosa	C0003125	disease	Mental Disorders	Mental or Behavioral Dysfunction	202	72	0.01	0	1	0	2019	2019
MDK	4192	Arteriosclerosis	C0003850	disease	Cardiovascular Diseases	Disease or Syndrome	2006	267	0.01	0	1	0	2017	2017
MDK	4192	Arthritis	C0003864	disease	Musculoskeletal Diseases	Disease or Syndrome	1072	69	0.01	1	1	0	2004	2004
MDK	4192	Astrocytoma	C0004114	disease	Neoplasms	Neoplastic Process	985	59	0.01	1	1	0	1999	1999
MDK	4192	Atherosclerosis	C0004153	disease	Cardiovascular Diseases	Disease or Syndrome	2044	281	0.01	0	1	0	2017	2017
MDK	4192	Autoimmune Diseases	C0004364	group	Immune System Diseases	Disease or Syndrome	1758	428	0.01	1	1	0	2017	2017
MDK	4192	Brain Neoplasms	C0006118	group	Neoplasms; Nervous System Diseases	Neoplastic Process	1018	204	0.01	1	1	0	1999	1999
MDK	4192	Cachexia	C0006625	phenotype	Pathological Conditions, Signs and Symptoms	Sign or Symptom	273	11	0.01	1	1	0	2007	2007
MDK	4192	Malignant tumor of colon	C0007102	disease	Digestive System Diseases; Neoplasms	Neoplastic Process	2969	688	0.01	1	1	0	2004	2004
MDK	4192	Malignant neoplasm of endometrium	C0007103	disease	Neoplasms; Female Urogenital Diseases and Pregnancy Complications	Neoplastic Process	1235	197	0.01	1	1	0	2020	2020
MDK	4192	Carcinoma, Papillary	C0007133	disease	Neoplasms	Neoplastic Process	225	9	0.01	1	1	0	2000	2000
MDK	4192	Cerebral Infarction	C0007785	disease	Pathological Conditions, Signs and Symptoms; Nervous System Diseases; Cardiovascular Diseases	Disease or Syndrome	687	123	0.01	1	1	0	2008	2008
MDK	4192	Brain Ischemia	C0007786	disease	Nervous System Diseases; Cardiovascular Diseases	Disease or Syndrome	358	5	0.01	1	1	0	2002	2002
MDK	4192	Colonic Neoplasms	C0009375	group	Digestive System Diseases; Neoplasms	Neoplastic Process	947	45	0.01	1	1	0	2004	2004
MDK	4192	Cystic Fibrosis	C0010674	disease	Congenital, Hereditary, and Neonatal Diseases and Abnormalities; Digestive System Diseases; Respiratory Tract Diseases	Disease or Syndrome	852	704	0.01	1	1	0	2013	2013
MDK	4192	Dwarfism	C0013336	disease	Congenital, Hereditary, and Neonatal Diseases and Abnormalities; Musculoskeletal Diseases; Endocrine System Diseases	Congenital Abnormality	1261	77	0.01	1	1	0	2019	2019
MDK	4192	Endometrial Neoplasms	C0014170	group	Neoplasms; Female Urogenital Diseases and Pregnancy Complications	Neoplastic Process	261	32	0.01	1	1	0	2008	2008
MDK	4192	Hematological Disease	C0018939	group	Hemic and Lymphatic Diseases	Disease or Syndrome	255	16	0.01	1	1	0	2010	2010
MDK	4192	HIV Infections	C0019693	group	Infections; Immune System Diseases	Disease or Syndrome	807	142	0.01	1	1	0	2006	2006
MDK	4192	Hodgkin Disease	C0019829	disease	Neoplasms; Immune System Diseases; Hemic and Lymphatic Diseases	Neoplastic Process	900	148	0.01	1	1	0	2000	2000
MDK	4192	Inflammatory Bowel Diseases	C0021390	group	Digestive System Diseases	Disease or Syndrome	1577	605	0.01	1	1	0	2019	2019
MDK	4192	insulinoma	C0021670	disease	Digestive System Diseases; Neoplasms; Endocrine System Diseases	Neoplastic Process	258	8	0.01	1	1	0	2007	2007
MDK	4192	leukemia	C0023418	disease	Neoplasms	Neoplastic Process	2111	144	0.01	1	1	0	2009	2009
MDK	4192	Lymphoid leukemia	C0023448	disease	Neoplasms; Immune System Diseases; Hemic and Lymphatic Diseases	Neoplastic Process	288	4	0.01	1	1	0	2010	2010
MDK	4192	Chronic Obstructive Airway Disease	C0024117	disease	Respiratory Tract Diseases	Disease or Syndrome	1428	852	0.01	1	1	0	2013	2013
MDK	4192	Lupus Nephritis	C0024143	disease	Female Urogenital Diseases and Pregnancy Complications; Skin and Connective Tissue Diseases; Male Urogenital Diseases; Immune System Diseases	Disease or Syndrome	503	64	0.01	1	1	0	2017	2017
MDK	4192	Lymphoma	C0024299	group	Neoplasms; Immune System Diseases; Hemic and Lymphatic Diseases	Neoplastic Process	1548	91	0.01	1	1	0	2000	2000
MDK	4192	Lymphoma, Non-Hodgkin	C0024305	disease	Neoplasms; Immune System Diseases; Hemic and Lymphatic Diseases	Neoplastic Process	733	197	0.01	1	1	0	2000	2000
MDK	4192	Medulloblastoma	C0025149	disease	Neoplasms	Neoplastic Process	862	115	0.01	1	1	0	1999	1999
MDK	4192	Meningioma	C0025286	disease	Neoplasms; Nervous System Diseases	Neoplastic Process	634	43	0.01	1	1	0	2007	2007
MDK	4192	Meningitis	C0025289	disease	Nervous System Diseases	Disease or Syndrome	191	13	0.01	1	1	0	2008	2008
MDK	4192	Multiple Sclerosis	C0026769	disease	Immune System Diseases; Nervous System Diseases	Disease or Syndrome	1800	1022	0.01	1	1	0	2019	2019
MDK	4192	Myocarditis	C0027059	disease	Cardiovascular Diseases	Disease or Syndrome	285	2	0.01	1	1	0	2019	2019
MDK	4192	nervous system disorder	C0027765	group	Nervous System Diseases	Disease or Syndrome	977	39	0.01	1	1	0	2019	2019
MDK	4192	Nervous System Neoplasms	C0027766	group	Neoplasms; Nervous System Diseases	Neoplastic Process	68	1	0.01	1	1	0	2001	2001
MDK	4192	Odontogenic Tumors	C0028880	group	Neoplasms	Neoplastic Process	62	2	0.01	1	1	0	2008	2008
MDK	4192	Pancreatic Neoplasm	C0030297	disease	Digestive System Diseases; Neoplasms; Endocrine System Diseases	Neoplastic Process	764	20	0.01	1	1	0	2002	2002
MDK	4192	Pancreatitis	C0030305	disease	Digestive System Diseases	Disease or Syndrome	502	80	0.01	1	1	0	2017	2017
MDK	4192	Periapical Granuloma	C0031029	disease	Stomatognathic Diseases	Disease or Syndrome	41	0	0.01	1	1	0	2011	2011
MDK	4192	Periapical Periodontitis	C0031030	disease	Stomatognathic Diseases	Disease or Syndrome	90	5	0.01	1	1	0	2011	2011
MDK	4192	Pituitary Diseases	C0032002	group	Nervous System Diseases; Endocrine System Diseases	Disease or Syndrome	153	3	0.01	1	1	0	2017	2017
MDK	4192	Respiratory Distress Syndrome, Adult	C0035222	disease	Respiratory Tract Diseases	Disease or Syndrome	434	60	0.01	1	1	0	2019	2019
MDK	4192	Septicemia	C0036690	disease	Pathological Conditions, Signs and Symptoms; Infections	Disease or Syndrome	1285	141	0.01	1	1	0	2019	2019
MDK	4192	synovial sarcoma	C0039101	disease	Neoplasms	Neoplastic Process	299	4	0.01	1	1	0	2017	2017
MDK	4192	Fibromatosis, Aggressive	C0079218	disease	Neoplasms	Neoplastic Process	84	12	0.01	1	1	0	2011	2011
MDK	4192	Pleural Effusion, Malignant	C0080032	disease	Neoplasms; Respiratory Tract Diseases	Disease or Syndrome	119	6	0.01	1	1	0	2013	2013
MDK	4192	Sweet Syndrome	C0085077	disease	Skin and Connective Tissue Diseases	Disease or Syndrome	104	3	0.01	1	1	0	2017	2017
MDK	4192	Sicca Syndrome	C0086981	disease	Eye Diseases; Skin and Connective Tissue Diseases; Musculoskeletal Diseases; Immune System Diseases; Stomatognathic Diseases	Disease or Syndrome	132	4	0.01	1	1	0	2017	2017
MDK	4192	Adenocarcinoma of lung (disorder)	C0152013	disease	Neoplasms	Neoplastic Process	2438	563	0.01	1	1	0	2013	2013
MDK	4192	Esophageal carcinoma	C0152018	disease	Digestive System Diseases; Neoplasms	Neoplastic Process	1287	272	0.01	1	1	0	1999	1999
MDK	4192	Malignant neoplasm of duodenum	C0153426	disease	Digestive System Diseases; Neoplasms	Neoplastic Process	5	1	0.01	1	1	0	1998	1998
MDK	4192	Secondary malignant neoplasm of lung	C0153676	disease	Neoplasms; Respiratory Tract Diseases	Neoplastic Process	1370	20	0.01	1	1	0	2012	2012
MDK	4192	Aortic Aneurysm, Abdominal	C0162871	disease	Cardiovascular Diseases	Disease or Syndrome	586	90	0.01	1	1	0	2017	2017
MDK	4192	Germ cell tumor	C0205851	disease	Neoplasms	Neoplastic Process	278	5	0.01	1	1	0	1997	1997
MDK	4192	Ki-1+ Anaplastic Large Cell Lymphoma	C0206180	disease	Neoplasms; Immune System Diseases; Hemic and Lymphatic Diseases	Neoplastic Process	300	10	0.01	1	1	0	2008	2008
MDK	4192	Alveolar Soft Part Sarcoma	C0206657	disease	Neoplasms	Neoplastic Process	61	0	0.01	1	1	0	2011	2011
MDK	4192	Neuroectodermal Tumor, Primitive	C0206663	disease	Neoplasms	Neoplastic Process	184	6	0.01	1	1	0	1999	1999
MDK	4192	Cholangiocarcinoma	C0206698	disease	Neoplasms	Neoplastic Process	877	43	0.01	1	1	0	2018	2018
MDK	4192	Neuroendocrine Tumors	C0206754	group	Neoplasms	Neoplastic Process	491	20	0.01	1	1	0	2017	2017
MDK	4192	Neoplasm, Residual	C0242596	phenotype	Pathological Conditions, Signs and Symptoms; Neoplasms	Neoplastic Process	329	23	0.01	1	1	0	2007	2007
MDK	4192	Sepsis	C0243026	disease	Pathological Conditions, Signs and Symptoms; Infections	Disease or Syndrome	1453	144	0.01	1	1	0	2019	2019
MDK	4192	Necrosis of pancreas	C0267953	disease	Digestive System Diseases	Disease or Syndrome	16	1	0.01	1	1	0	2017	2017
MDK	4192	Primary amyloidosis	C0268381	disease	Neoplasms; Nutritional and Metabolic Diseases; Immune System Diseases	Disease or Syndrome	59	11	0.01	1	1	0	2009	2009
MDK	4192	Adult Malignant Peripheral Nerve Sheath Tumor	C0278622	disease	Neoplasms; Nervous System Diseases	Neoplastic Process	62	2	0.01	1	1	0	2005	2005
MDK	4192	Adult Meningioma	C0278877	disease	Neoplasms; Nervous System Diseases	Neoplastic Process	405	30	0.01	1	1	0	2007	2007
MDK	4192	Childhood Solid Neoplasm	C0279068	phenotype		Neoplastic Process	169	3	0.01	1	1	0	2013	2013
MDK	4192	Childhood Malignant Peripheral Nerve Sheath Tumor	C0279987	disease	Neoplasms; Nervous System Diseases	Neoplastic Process	62	2	0.01	1	1	0	2005	2005
MDK	4192	stage, cervical cancer	C0280232	phenotype	Neoplasms; Female Urogenital Diseases and Pregnancy Complications	Neoplastic Process	48	0	0.01	0	1	0	2003	2003
MDK	4192	Asbestos pleurisy	C0339997	disease	Infections; Respiratory Tract Diseases	Disease or Syndrome	3	0	0.01	1	1	0	2017	2017
MDK	4192	Skin callus	C0376154	disease	Skin and Connective Tissue Diseases	Acquired Abnormality	154	0	0.01	1	1	0	2017	2017
MDK	4192	Endotoxemia	C0376618	phenotype	Pathological Conditions, Signs and Symptoms; Infections	Disease or Syndrome	401	5	0.01	1	1	0	2019	2019
MDK	4192	Endometrial Carcinoma	C0476089	disease	Neoplasms; Female Urogenital Diseases and Pregnancy Complications	Neoplastic Process	1597	326	0.01	1	1	0	2020	2020
MDK	4192	Secondary malignant neoplasm of liver	C0494165	disease	Digestive System Diseases; Neoplasms	Neoplastic Process	951	34	0.01	1	1	0	2018	2018
MDK	4192	Osteoporotic Fractures	C0521170	group	Wounds and Injuries	Disease or Syndrome	108	40	0.01	1	1	0	2018	2018
MDK	4192	Pervasive Development Disorder	C0524528	group	Mental Disorders	Mental or Behavioral Dysfunction	328	49	0.01	1	1	0	2018	2018
MDK	4192	Duodenal Cancer	C0541912	disease	Digestive System Diseases; Neoplasms	Neoplastic Process	8	1	0.01	1	1	0	1998	1998
MDK	4192	Malignant neoplasm of esophagus	C0546837	disease	Digestive System Diseases; Neoplasms	Neoplastic Process	1286	214	0.01	1	1	0	1999	1999
MDK	4192	Ewings sarcoma	C0553580	disease	Neoplasms	Neoplastic Process	517	25	0.01	1	1	0	2001	2001
MDK	4192	Middle Cerebral Artery Occlusion	C0740391	disease	Pathological Conditions, Signs and Symptoms; Nervous System Diseases; Cardiovascular Diseases	Acquired Abnormality	626	0	0.01	1	1	0	2018	2018
MDK	4192	Biliary Tract Cancer	C0750952	disease	Digestive System Diseases; Neoplasms	Neoplastic Process	167	11	0.01	1	1	0	2018	2018
MDK	4192	Malignant Pleural Mesothelioma	C0812413	disease	Neoplasms; Respiratory Tract Diseases	Neoplastic Process	421	15	0.01	1	1	0	2017	2017
MDK	4192	Arteriopathic disease	C0852949	group	Pathological Conditions, Signs and Symptoms; Cardiovascular Diseases	Disease or Syndrome	101	14	0.01	1	1	0	2017	2017
MDK	4192	Breast adenocarcinoma	C0858252	disease	Neoplasms; Skin and Connective Tissue Diseases	Neoplastic Process	219	7	0.01	1	1	0	1991	1991
MDK	4192	Ischemic stroke	C0948008	disease	Nervous System Diseases; Cardiovascular Diseases	Disease or Syndrome	1159	704	0.01	1	1	0	2018	2018
MDK	4192	Squamous cell carcinoma of the head and neck	C1168401	disease	Neoplasms	Neoplastic Process	1543	348	0.01	1	1	0	2008	2008
MDK	4192	Sarcoma	C1261473	group	Neoplasms	Neoplastic Process	853	42	0.01	1	1	0	2008	2008
MDK	4192	Precursor B-cell lymphoblastic leukemia	C1292769	disease	Neoplasms; Immune System Diseases; Hemic and Lymphatic Diseases	Neoplastic Process	478	23	0.01	1	1	0	2007	2007
MDK	4192	Primary malignant neoplasm of lung	C1306460	disease	Neoplasms; Respiratory Tract Diseases	Neoplastic Process	3894	981	0.01	1	1	0	2013	2013
MDK	4192	Staphylococcus aureus infection	C1318973	disease	Infections	Disease or Syndrome	49	4	0.01	1	1	0	2013	2013
MDK	4192	Childhood Leukemia	C1332977	disease	Neoplasms	Neoplastic Process	1740	140	0.01	1	1	0	2009	2009
MDK	4192	Differentiated Thyroid Gland Carcinoma	C1337013	disease		Neoplastic Process	245	80	0.01	1	1	0	2017	2017
MDK	4192	Epithelioma	C1368683	disease	Neoplasms	Neoplastic Process	326	2	0.01	1	1	0	1997	1997
MDK	4192	Mammary Neoplasms	C1458155	group	Neoplasms; Skin and Connective Tissue Diseases	Neoplastic Process	2780	385	0.01	1	1	0	2004	2004
MDK	4192	Autism Spectrum Disorders	C1510586	disease	Mental Disorders	Mental or Behavioral Dysfunction	1071	331	0.01	1	1	0	2018	2018
MDK	4192	Neoplasms, Intracranial	C1527390	group	Neoplasms; Nervous System Diseases	Neoplastic Process	157	4	0.01	1	1	0	2007	2007
MDK	4192	ST segment elevation myocardial infarction	C1536220	disease	Pathological Conditions, Signs and Symptoms; Cardiovascular Diseases	Disease or Syndrome	264	16	0.01	1	1	0	2018	2018
MDK	4192	Chronic Kidney Diseases	C1561643	group	Female Urogenital Diseases and Pregnancy Complications; Male Urogenital Diseases	Disease or Syndrome	1074	306	0.01	1	1	0	2017	2017
MDK	4192	Malignant transformation	C1608408	phenotype		Neoplastic Process	1027	20	0.01	1	1	0	2008	2008
MDK	4192	tumor vasculature	C1658953	phenotype		Neoplastic Process	200	0	0.01	1	1	0	2002	2002
MDK	4192	Pneumonia, Ventilator-Associated	C1701940	disease	Pathological Conditions, Signs and Symptoms; Infections; Respiratory Tract Diseases	Disease or Syndrome	56	3	0.01	1	1	0	2013	2013
MDK	4192	Progression of non-small cell lung cancer	C1737250	disease		Neoplastic Process	151	0	0.01	1	1	0	2012	2012
MDK	4192	Meningioma, benign, no ICD-O subtype	C1762616	disease	Neoplasms; Nervous System Diseases	Neoplastic Process	404	30	0.01	1	1	0	2007	2007
MDK	4192	MYELOPROLIFERATIVE DISORDER, CHRONIC, WITH EOSINOPHILIA	C1851585	disease	Hemic and Lymphatic Diseases	Disease or Syndrome	119	5	0.01	1	1	0	2018	2018
MDK	4192	Microscopic Polyarteritis	C2347126	disease	Immune System Diseases; Nervous System Diseases; Cardiovascular Diseases	Disease or Syndrome	77	7	0.01	1	1	0	2017	2017
MDK	4192	Nasopharyngeal carcinoma	C2931822	disease	Neoplasms; Stomatognathic Diseases; Otorhinolaryngologic Diseases	Neoplastic Process	1553	320	0.01	1	1	0	2018	2018
MDK	4192	Autoinflammatory disease	C3267073	disease		Disease or Syndrome	81	10	0.01	1	1	0	2019	2019
MDK	4192	Cone-Rod Dystrophy 2	C3489532	disease	Congenital, Hereditary, and Neonatal Diseases and Abnormalities; Eye Diseases	Disease or Syndrome	254	51	0.01	1	1	0	2019	2019
MDK	4192	SHWACHMAN-DIAMOND SYNDROME 1	C4692625	disease		Disease or Syndrome	7	14	0.01	1	1	0	2004	2004
MDK	4192	Atherosclerotic lesion	C4703473	disease	Cardiovascular Diseases	Disease or Syndrome	253	0	0.01	1	1	0	2017	2017
MDK	4192	Primary differentiated carcinoma of thyroid gland	C4722172	disease		Neoplastic Process	167	41	0.01	1	1	0	2017	2017
LY6H	4062	mathematical ability	C0596887	phenotype		Mental Process	854	2127	0.1	1	1	1	2018	2018
KRTDAP	388533	Aortic Aneurysm	C0003486	disease	Cardiovascular Diseases	Disease or Syndrome	278	19	0.01	1	1	0	2018	2018
ISM1	140862	Body Height	C0005890	phenotype		Organism Attribute	1903	3972	0.1	1	1	1	2019	2019
ISM1	140862	Duration of sleep	C0424574	phenotype		Finding	104	203	0.1	1	1	1	2016	2016
ISM1	140862	Leukemia, Mast-Cell	C0023461	disease	Neoplasms	Neoplastic Process	75	7	0.02	1	2	0	2017	2019
ISM1	140862	Mastocytosis, Systemic	C0221013	disease	Neoplasms; Immune System Diseases	Neoplastic Process	94	11	0.02	1	2	0	2018	2019
ISM1	140862	Malignant Neoplasms	C0006826	group	Neoplasms	Neoplastic Process	8621	1641	0.01	1	1	0	2014	2014
ISM1	140862	Malignant tumor of colon	C0007102	disease	Digestive System Diseases; Neoplasms	Neoplastic Process	2969	688	0.01	1	1	0	2019	2019
ISM1	140862	Malignant neoplasm of stomach	C0024623	disease	Digestive System Diseases; Neoplasms	Neoplastic Process	3806	615	0.01	1	1	0	2014	2014
ISM1	140862	Neoplasms	C0027651	group	Neoplasms	Neoplastic Process	10161	1644	0.01	1	1	0	2019	2019
ISM1	140862	Schizophrenia	C0036341	disease	Mental Disorders	Mental or Behavioral Dysfunction	2872	2897	0.01	1	1	0	2018	2018
ISM1	140862	Colon Carcinoma	C0699790	disease	Digestive System Diseases; Neoplasms	Neoplastic Process	2832	275	0.01	1	1	0	2019	2019
ISM1	140862	Stomach Carcinoma	C0699791	disease	Digestive System Diseases; Neoplasms	Neoplastic Process	3720	652	0.01	1	1	0	2014	2014
ISM1	140862	Primary malignant neoplasm	C1306459	group	Neoplasms	Neoplastic Process	8221	1374	0.01	1	1	0	2014	2014
ISM1	140862	Low grade glioma	C1997217	disease	Neoplasms	Neoplastic Process	85	10	0.01	1	1	0	2019	2019
ISM1	140862	Liver carcinoma	C2239176	disease	Digestive System Diseases; Neoplasms	Neoplastic Process	5725	942	0.01	1	1	0	2019	2019
GAS1	2619	Lobar Holoprosencephaly	C0431362	disease	Congenital, Hereditary, and Neonatal Diseases and Abnormalities; Musculoskeletal Diseases; Nervous System Diseases	Congenital Abnormality	37	2	0.5	1	1	0	2007	2007
GAS1	2619	Alobar Holoprosencephaly	C0431363	disease	Congenital, Hereditary, and Neonatal Diseases and Abnormalities; Musculoskeletal Diseases; Nervous System Diseases	Congenital Abnormality	16	0	0.5	1	1	0	2007	2007
GAS1	2619	Semilobar Holoprosencephaly	C0751617	disease	Congenital, Hereditary, and Neonatal Diseases and Abnormalities; Musculoskeletal Diseases; Nervous System Diseases	Congenital Abnormality	17	5	0.5	1	1	0	2007	2007
GAS1	2619	Holoprosencephaly	C0079541	disease	Congenital, Hereditary, and Neonatal Diseases and Abnormalities; Musculoskeletal Diseases; Nervous System Diseases	Congenital Abnormality	109	45	0.43	1	3	0	2007	2012
GAS1	2619	Arhinencephaly	C0078982	disease	Congenital, Hereditary, and Neonatal Diseases and Abnormalities; Musculoskeletal Diseases; Nervous System Diseases	Congenital Abnormality	35	0	0.3	1	1	0	2007	2007
GAS1	2619	Cleft Palate	C0008925	disease	Congenital, Hereditary, and Neonatal Diseases and Abnormalities; Musculoskeletal Diseases; Stomatognathic Diseases	Congenital Abnormality	611	158	0.11	1	1	0	2007	2007
GAS1	2619	Asthma	C0004096	disease	Respiratory Tract Diseases; Immune System Diseases	Disease or Syndrome	2096	1536	0.1		0	0
GAS1	2619	Choanal Atresia	C0008297	disease	Congenital, Hereditary, and Neonatal Diseases and Abnormalities; Respiratory Tract Diseases; Otorhinolaryngologic Diseases	Congenital Abnormality	104	7	0.1		0	0
GAS1	2619	Dwarfism	C0013336	disease	Congenital, Hereditary, and Neonatal Diseases and Abnormalities; Musculoskeletal Diseases; Endocrine System Diseases	Congenital Abnormality	1261	77	0.1		0	0
GAS1	2619	Fetal Growth Retardation	C0015934	phenotype	Pathological Conditions, Signs and Symptoms; Congenital, Hereditary, and Neonatal Diseases and Abnormalities; Female Urogenital Diseases and Pregnancy Complications	Disease or Syndrome	1037	21	0.1		0	0
GAS1	2619	Hemangioma	C0018916	disease	Neoplasms	Neoplastic Process	256	24	0.1		0	0
GAS1	2619	Hypothyroidism	C0020676	disease	Endocrine System Diseases	Disease or Syndrome	613	283	0.1		0	0
GAS1	2619	Microcephaly	C0025958	disease	Congenital, Hereditary, and Neonatal Diseases and Abnormalities; Musculoskeletal Diseases; Nervous System Diseases	Congenital Abnormality	1064	27	0.1		0	0
GAS1	2619	Neoplasms	C0027651	group	Neoplasms	Neoplastic Process	10161	1644	0.1	1	14	0	1995	2018
GAS1	2619	Scoliosis, unspecified	C0036439	disease	Musculoskeletal Diseases	Disease or Syndrome	850	135	0.1		0	0
GAS1	2619	Seizures	C0036572	phenotype	Pathological Conditions, Signs and Symptoms; Nervous System Diseases	Sign or Symptom	2152	553	0.1		0	0
GAS1	2619	Strabismus	C0038379	disease	Eye Diseases; Nervous System Diseases	Disease or Syndrome	716	89	0.1		0	0
GAS1	2619	Tetralogy of Fallot	C0039685	disease	Congenital, Hereditary, and Neonatal Diseases and Abnormalities; Cardiovascular Diseases	Congenital Abnormality	274	83	0.1		0	0
GAS1	2619	Gestational Diabetes	C0085207	phenotype	Nutritional and Metabolic Diseases; Female Urogenital Diseases and Pregnancy Complications; Endocrine System Diseases	Disease or Syndrome	649	224	0.1		0	0
GAS1	2619	Premature Birth	C0151526	phenotype	Female Urogenital Diseases and Pregnancy Complications	Pathologic Function	192	50	0.1		0	0
GAS1	2619	Agenesis of corpus callosum	C0175754	disease	Pathological Conditions, Signs and Symptoms; Congenital, Hereditary, and Neonatal Diseases and Abnormalities; Nervous System Diseases	Congenital Abnormality	615	45	0.1		0	0
GAS1	2619	Coloboma of iris	C0240063	disease	Congenital, Hereditary, and Neonatal Diseases and Abnormalities; Eye Diseases	Anatomical Abnormality	153	12	0.1		0	0
GAS1	2619	Panhypopituitarism	C0242343	disease	Nervous System Diseases; Endocrine System Diseases	Disease or Syndrome	73	23	0.1		0	0
GAS1	2619	Duodenal atresia	C0266174	disease	Congenital, Hereditary, and Neonatal Diseases and Abnormalities; Digestive System Diseases	Congenital Abnormality	39	2	0.1		0	0
GAS1	2619	Ambiguous Genitalia	C0266362	disease	Congenital, Hereditary, and Neonatal Diseases and Abnormalities; Female Urogenital Diseases and Pregnancy Complications; Male Urogenital Diseases; Endocrine System Diseases	Congenital Abnormality	109	14	0.1		0	0
GAS1	2619	Congenital hypoplasia of penis	C0266435	disease	Congenital, Hereditary, and Neonatal Diseases and Abnormalities	Congenital Abnormality	237	0	0.1		0	0
GAS1	2619	Congenital coloboma of iris	C0266551	disease	Congenital, Hereditary, and Neonatal Diseases and Abnormalities; Eye Diseases	Congenital Abnormality	148	1	0.1		0	0
GAS1	2619	Cyclocephaly	C0266667	disease	Congenital, Hereditary, and Neonatal Diseases and Abnormalities; Musculoskeletal Diseases; Nervous System Diseases	Congenital Abnormality	35	0	0.1		0	0
GAS1	2619	Short stature	C0349588	phenotype		Finding	1127	292	0.1		0	0
GAS1	2619	Orbital separation diminished	C0424711	phenotype		Finding	89	11	0.1		0	0
GAS1	2619	Congenital absence of kidneys syndrome	C1609433	disease	Congenital, Hereditary, and Neonatal Diseases and Abnormalities; Female Urogenital Diseases and Pregnancy Complications; Male Urogenital Diseases	Disease or Syndrome	110	0	0.1		0	0
GAS1	2619	Tented upper lip vermilion	C1839767	phenotype		Finding	79	8	0.1		0	0
GAS1	2619	Anteverted nostril	C1840077	phenotype		Finding	407	35	0.1		0	0
GAS1	2619	SOLITARY MEDIAN MAXILLARY CENTRAL INCISOR	C1840235	disease	Congenital, Hereditary, and Neonatal Diseases and Abnormalities; Stomatognathic Diseases	Congenital Abnormality	20	3	0.1		0	0
GAS1	2619	Midnasal stenosis	C1840238	phenotype		Finding	16	0	0.1		0	0
GAS1	2619	Short nose	C1854114	phenotype		Finding	265	23	0.1		0	0
GAS1	2619	Short philtrum	C1861324	phenotype		Finding	182	25	0.1		0	0
GAS1	2619	Short Stature, CTCAE	C2919142	phenotype		Finding	1010	0	0.1		0	0
GAS1	2619	Intellectual Disability	C3714756	group	Pathological Conditions, Signs and Symptoms; Nervous System Diseases; Mental Disorders; Behavior and Behavior Mechanisms	Mental or Behavioral Dysfunction	2165	159	0.1		0	0
GAS1	2619	EMG: myopathic abnormalities	C4021726	phenotype	Musculoskeletal Diseases; Nervous System Diseases	Pathologic Function	115	16	0.1		0	0
GAS1	2619	Narrow nasal bridge	C4551564	phenotype		Finding	47	2	0.1		0	0
GAS1	2619	Glioma	C0017638	disease	Neoplasms	Neoplastic Process	3097	353	0.05	1	5	0	2004	2014
GAS1	2619	Malignant Neoplasms	C0006826	group	Neoplasms	Neoplastic Process	8621	1641	0.04	0.75	4	0	2009	2017
GAS1	2619	Primary malignant neoplasm	C1306459	group	Neoplasms	Neoplastic Process	8221	1374	0.04	0.75	4	0	2009	2017
GAS1	2619	Neoplasm Metastasis	C0027627	phenotype	Pathological Conditions, Signs and Symptoms; Neoplasms	Neoplastic Process	6385	327	0.03	1	3	0	2008	2016
GAS1	2619	Glioblastoma Multiforme	C1621958	disease	Neoplasms	Neoplastic Process	3197	186	0.03	1	3	0	2014	2018
GAS1	2619	Congenital Abnormality	C0000768	group	Congenital, Hereditary, and Neonatal Diseases and Abnormalities	Congenital Abnormality	1098	73	0.02	1	2	0	2007	2010
GAS1	2619	Colorectal Carcinoma	C0009402	disease	Digestive System Diseases; Neoplasms	Neoplastic Process	5473	1962	0.02	1	2	0	2011	2016
GAS1	2619	Glioblastoma	C0017636	disease	Neoplasms	Neoplastic Process	3177	281	0.02	1	2	0	2018	2018
GAS1	2619	Malignant neoplasm of stomach	C0024623	disease	Digestive System Diseases; Neoplasms	Neoplastic Process	3806	615	0.02	1	2	0	2009	2012
GAS1	2619	Papillary thyroid carcinoma	C0238463	disease	Neoplasms; Endocrine System Diseases	Neoplastic Process	1348	204	0.02	1	2	0	2005	2013
GAS1	2619	Adult Glioblastoma	C0278878	disease	Neoplasms	Neoplastic Process	2528	98	0.02	1	2	0	2018	2018
GAS1	2619	Childhood Glioblastoma	C0280474	disease	Neoplasms	Neoplastic Process	2527	98	0.02	1	2	0	2018	2018
GAS1	2619	Carcinogenesis	C0596263	phenotype	Pathological Conditions, Signs and Symptoms; Neoplasms	Neoplastic Process	6243	355	0.02	0.5	2	0	2013	2016
GAS1	2619	Malignant neoplasm of colon and/or rectum	C4722085	disease		Neoplastic Process	3669	502	0.02	1	2	0	2011	2016
GAS1	2619	Basal Cell Nevus Syndrome	C0004779	disease	Congenital, Hereditary, and Neonatal Diseases and Abnormalities; Neoplasms; Musculoskeletal Diseases; Stomatognathic Diseases	Neoplastic Process	74	124	0.01	1	1	0	1995	1995
GAS1	2619	Malignant neoplasm of urinary bladder	C0005684	disease	Neoplasms; Female Urogenital Diseases and Pregnancy Complications; Male Urogenital Diseases	Neoplastic Process	2113	316	0.01	1	1	0	1996	1996
GAS1	2619	Bladder Neoplasm	C0005695	disease	Neoplasms; Female Urogenital Diseases and Pregnancy Complications; Male Urogenital Diseases	Neoplastic Process	2130	281	0.01	1	1	0	1996	1996
GAS1	2619	Malignant neoplasm of breast	C0006142	disease	Neoplasms; Skin and Connective Tissue Diseases	Neoplastic Process	6941	3417	0.01	1	1	0	2005	2005
GAS1	2619	Diabetes	C0011847	disease	Endocrine System Diseases	Disease or Syndrome	2359	710	0.01	1	1	0	2017	2017
GAS1	2619	Diabetes Mellitus	C0011849	group	Nutritional and Metabolic Diseases; Endocrine System Diseases	Disease or Syndrome	2803	824	0.01	1	1	0	2017	2017
GAS1	2619	Hereditary Sensory Autonomic Neuropathy, Type 1	C0020071	disease	Congenital, Hereditary, and Neonatal Diseases and Abnormalities; Nervous System Diseases	Disease or Syndrome	32	14	0.01	1	1	0	1997	1997
GAS1	2619	Hypopituitarism	C0020635	disease	Nervous System Diseases; Endocrine System Diseases	Disease or Syndrome	69	4	0.01	0	1	0	2015	2015
GAS1	2619	Kidney Diseases	C0022658	group	Female Urogenital Diseases and Pregnancy Complications; Male Urogenital Diseases	Disease or Syndrome	1180	140	0.01	1	1	0	2015	2015
GAS1	2619	melanoma	C0025202	disease	Neoplasms	Neoplastic Process	3087	515	0.01	1	1	0	2008	2008
GAS1	2619	Neuroblastoma	C0027819	disease	Neoplasms	Neoplastic Process	2509	386	0.01	1	1	0	2002	2002
GAS1	2619	Osteosarcoma	C0029463	disease	Neoplasms	Neoplastic Process	2283	178	0.01	1	1	0	2016	2016
GAS1	2619	Rabies (disorder)	C0034494	disease	Infections	Disease or Syndrome	123	0	0.01	1	1	0	1996	1996
GAS1	2619	Intervertebral Disc Degeneration	C0158266	disease	Musculoskeletal Diseases	Disease or Syndrome	342	47	0.01	1	1	0	2017	2017
GAS1	2619	Tumor Progression	C0178874	phenotype	Pathological Conditions, Signs and Symptoms	Neoplastic Process	3865	72	0.01	1	1	0	2016	2016
GAS1	2619	Conventional (Clear Cell) Renal Cell Carcinoma	C0279702	disease	Neoplasms; Female Urogenital Diseases and Pregnancy Complications; Male Urogenital Diseases	Neoplastic Process	2346	222	0.01	1	1	0	2017	2017
GAS1	2619	Glaucoma, Primary Open Angle	C0339573	disease	Eye Diseases	Disease or Syndrome	383	222	0.01	1	1	0	2008	2008
GAS1	2619	Congenital deafness	C0339789	disease	Pathological Conditions, Signs and Symptoms; Congenital, Hereditary, and Neonatal Diseases and Abnormalities; Female Urogenital Diseases and Pregnancy Complications; Nervous System Diseases; Otorhinolaryngologic Diseases	Congenital Abnormality	72	11	0.01	1	1	0	2007	2007
GAS1	2619	Nicotinamide adenine dinucleotide coenzyme Q reductase deficiency	C0342776	disease		Disease or Syndrome	51	4	0.01	1	1	0	2015	2015
GAS1	2619	Osteosarcoma of bone	C0585442	disease	Neoplasms	Neoplastic Process	2247	151	0.01	1	1	0	2016	2016
GAS1	2619	Breast Carcinoma	C0678222	disease	Neoplasms; Skin and Connective Tissue Diseases	Neoplastic Process	6776	2793	0.01	1	1	0	2005	2005
GAS1	2619	Stomach Carcinoma	C0699791	disease	Digestive System Diseases; Neoplasms	Neoplastic Process	3720	652	0.01	1	1	0	2012	2012
GAS1	2619	Carcinoma of bladder	C0699885	disease	Neoplasms; Female Urogenital Diseases and Pregnancy Complications; Male Urogenital Diseases	Neoplastic Process	2104	309	0.01	1	1	0	1996	1996
GAS1	2619	Central neuroblastoma	C0700095	disease	Neoplasms; Nervous System Diseases	Neoplastic Process	2419	231	0.01	1	1	0	2002	2002
GAS1	2619	Anxiety symptoms	C0860603	phenotype		Sign or Symptom	110	10	0.01	1	1	0	2017	2017
GAS1	2619	Childhood Osteosarcoma	C1332986	disease	Neoplasms	Neoplastic Process	2208	151	0.01	1	1	0	2016	2016
GAS1	2619	Cleft palate, isolated	C1837218	disease	Congenital, Hereditary, and Neonatal Diseases and Abnormalities; Musculoskeletal Diseases; Stomatognathic Diseases	Congenital Abnormality	295	70	0.01	1	1	0	2007	2007
GAS1	2619	Uranostaphyloschisis	C2981150	disease	Congenital, Hereditary, and Neonatal Diseases and Abnormalities; Musculoskeletal Diseases; Respiratory Tract Diseases; Stomatognathic Diseases; Otorhinolaryngologic Diseases	Congenital Abnormality	190	75	0.01	1	1	0	2007	2007
GAS1	2619	Triple Negative Breast Neoplasms	C3539878	disease	Neoplasms; Skin and Connective Tissue Diseases	Neoplastic Process	1674	99	0.01	1	1	0	2014	2014
GAS1	2619	intracranial glioma	C3665419	disease	Neoplasms; Nervous System Diseases	Neoplastic Process	108	1	0.01	1	1	0	2014	2014
GAS1	2619	Childhood Neuroblastoma	C4086165	disease	Neoplasms	Neoplastic Process	2420	231	0.01	1	1	0	2002	2002
GAS1	2619	Peripheral Nervous System Diseases	C4721453	group	Nervous System Diseases	Disease or Syndrome	549	69	0.01	1	1	0	1997	1997
GAS1	2619	Triple-Negative Breast Carcinoma	C4722518	disease	Neoplasms; Skin and Connective Tissue Diseases	Neoplastic Process	1598	96	0.01	1	1	0	2014	2014
CDNF	441549	Cocaine Dependence	C0600427	disease	Chemically-Induced Disorders; Mental Disorders	Mental or Behavioral Dysfunction	199	39	0.31	0	1	0	2009	2009
CDNF	441549	Parkinson Disease	C0030567	disease	Nervous System Diseases	Disease or Syndrome	2078	990	0.1	1	18	1	2007	2020
CDNF	441549	Blood Protein Measurement	C2985280	phenotype		Laboratory Procedure	1156	2575	0.1	1	1	1	2018	2018
CDNF	441549	Neurodegenerative Disorders	C0524851	group	Nervous System Diseases	Disease or Syndrome	1515	85	0.03	1	3	0	2017	2019
CDNF	441549	Alzheimer's Disease	C0002395	disease	Nervous System Diseases; Mental Disorders	Disease or Syndrome	3397	1843	0.02	1	2	0	2015	2019
CDNF	441549	Cerebrovascular accident	C0038454	group	Nervous System Diseases; Cardiovascular Diseases	Disease or Syndrome	1658	591	0.02	1	2	0	2019	2020
CDNF	441549	Cerebral Infarction	C0007785	disease	Pathological Conditions, Signs and Symptoms; Nervous System Diseases; Cardiovascular Diseases	Disease or Syndrome	687	123	0.01	1	1	0	2018	2018
CDNF	441549	Brain Ischemia	C0007786	disease	Nervous System Diseases; Cardiovascular Diseases	Disease or Syndrome	358	5	0.01	1	1	0	2018	2018
CDNF	441549	Diabetes	C0011847	disease	Endocrine System Diseases	Disease or Syndrome	2359	710	0.01	1	1	0	2017	2017
CDNF	441549	Diabetes Mellitus	C0011849	group	Nutritional and Metabolic Diseases; Endocrine System Diseases	Disease or Syndrome	2803	824	0.01	1	1	0	2017	2017
CDNF	441549	Fever	C0015967	phenotype	Pathological Conditions, Signs and Symptoms	Sign or Symptom	1021	66	0.01	1	1	0	2017	2017
CDNF	441549	nervous system disorder	C0027765	group	Nervous System Diseases	Disease or Syndrome	977	39	0.01	1	1	0	2019	2019
CDNF	441549	Schizophrenia	C0036341	disease	Mental Disorders	Mental or Behavioral Dysfunction	2872	2897	0.01	1	1	0	2018	2018
CDNF	441549	Middle Cerebral Artery Occlusion	C0740391	disease	Pathological Conditions, Signs and Symptoms; Nervous System Diseases; Cardiovascular Diseases	Acquired Abnormality	626	0	0.01	1	1	0	2018	2018
CDNF	441549	Young onset Parkinson disease	C4275179	disease	Nervous System Diseases	Disease or Syndrome	51	32	0.01	0	1	0	2011	2011

## Sheet: Data_S2 Pivot
Type	(Multiple Items)
Row Labels	Count of Disease	Sum of N_PMIDs	Average of Score_GDA	Min of Score_GDA	Max of Score_GDA
CDNF	13	34	0.0430769	0.01	0.31
GAS1	70	85	0.0724286	0.01	0.5
ISM1	12	14	0.0116667	0.01	0.02
KRTDAP	1	1	0.01	0.01	0.01
MDK	191	490	0.045288	0.01	0.62
MYOC	66	609	0.119091	0.01	0.72
NRN1	19	26	0.0294737	0.01	0.34
OMG	22	32	0.0145455	0.01	0.04
OSTN	6	6	0.01	0.01	0.01
PTN	148	320	0.0424324	0.01	0.3
SCRG1	1	1	0.01	0.01	0.01
SMOC1	87	81	0.0887356	0.01	0.99
SPARC	293	943	0.0575085	0.01	0.7
STC1	124	229	0.018629	0.01	0.2
STC2	79	153	0.0548101	0.01	0.35
TAFA2	10	13	0.183	0.01	0.3
TAFA5	14	14	0.0228571	0.01	0.1
VWC2L	3	3	0.1	0.1	0.1
