# Supplementary material for: Identification of orphan ligand-receptor relationships using a cell-based CRISPRa enrichment screening platform
Source: eLife. 2022 Sep 30;11:e81398. doi: 10.7554/eLife.81398 (PMC9578707; doi:10.7554/eLife.81398)
Supplement: Figure 2—source data 5. — Table of SPR conditions for all ligand-analyte pairs tested including ligand RU, maximum analyte concentration, analyte RU at maximum concentration, injection time (s), injection rate (µl/min), dissociation time (s), regeneration conditions and fit data. [file elife-81398-fig2-data5.xlsx]

## Sheet: Data S4
Ligand (bio+)	Analyte (bio-)	Max Analyte Conc (nM)	Dilution Series	Injection Time (sec)	Injection Rate (ul/min)	Time Dissociation (sec)	Regeneration	Regen Rate (ul/min)
PTPRA	GAS1	10000	2	60	30	240	2 x 10 sec 2M MgCl2	50
PRPRJ	GAS1	10000	2	60	30	240	2 x 10 sec 2M MgCl2	50
PTPRU	GAS1	10000	2	60	30	240	2 x 10 sec 2M MgCl2	50
PTPRU	OMG	15000	2	60	30	240	2 x 10 sec 2M MgCl2	50
OMG	PTPRU	2000	2	60	30	240	2 x 10 sec 2M MgCl2	50
OMG	PTPRT	25000	2	60	30	240	2 x 10 sec 2M MgCl2	50
OMG	PTPRM	25000	2	60	30	240	2 x 10 sec 2M MgCl2	50
OMG	PTPRK	25000	2	60	30	240	2 x 10 sec 2M MgCl2	50
OMG	PTPRS	25000	2	60	30	240	2 x 10 sec 2M MgCl2	50
OMG	PTPRF	25000	2	60	30	240	2 x 10 sec 2M MgCl2	50
OMG	PTPRD	25000	2	60	30	240	2 x 10 sec 2M MgCl2	50
OMG	PTPRJ	25000	2	60	30	240	2 x 10 sec 2M MgCl2	50
PTPRU	OSTN	250	2	60	30	240	2 x 10 sec 2M MgCl2	50
PTPRT	OSTN	500	2	60	30	240	2 x 10 sec 2M MgCl2	50
PTPRM	OSTN	500	2	60	30	240	2 x 10 sec 2M MgCl2	50
PTPRK	OSTN	500	2	60	30	240	2 x 10 sec 2M MgCl2	50
PTPRS	OSTN	500	2	60	30	240	2 x 10 sec 2M MgCl2	50
PTPRF	OSTN	500	2	60	30	240	2 x 10 sec 2M MgCl2	50
PTPRD	OSTN	500	2	60	30	240	2 x 10 sec 2M MgCl2	50
PTPRJ	OSTN	500	2	60	30	240	2 x 10 sec 2M MgCl2	50
KIR3DL1	TAFA2	40000	2	60	30	240	2 x 10 sec 2M MgCl2	50
TAFA2	KIR3DL1	60000	2	60	30	240	2 x 10 sec 2M MgCl2	50
KIR3DL3	TAFA2	80000	2	60	30	240	2 x 10 sec 2M MgCl2	50
PTN	RNF167	30000	1	60	30	240	2 x 10 sec 2M MgCl2	50
MDK	RNF167	30000	1	60	30	240	2 x 10 sec 2M MgCl2	50
PTN	RNF128	30000	1	60	30	240	2 x 10 sec 2M MgCl2	50
MDK	RNF128	30000	1	60	30	240	2 x 10 sec 2M MgCl2	50
RNF167	TAFA2	80000	2	60	30	240	2 x 10 sec 2M MgCl2	50
TAFA5	RNF167	40000	2	60	30	240	2 x 10 sec 2M MgCl2	50
MFRP	PTN	5000	2	60	30	240	2 x 10 sec 2M MgCl2	50
ROR1	PTN	5000	2	60	30	240	2 x 10 sec 2M MgCl2	50
SMOC1	SMOC1	15000	2	60	30	240	2 x 10 sec 2M MgCl2	50
BST2	SMOC1	25000	2	60	30	240	2 x 10 sec 2M MgCl2	50
IGSF23	SMOC1	25000	2	60	30	240	2 x 10 sec 2M MgCl2	50
SMOC2	SMOC1	25000	2	60	30	240	2 x 10 sec 2M MgCl2	50
RNF167	MCAM	20000	2	60	30	240	2 x 10 sec 2M MgCl2	50
MFRP	MDK	5000	2	60	30	240	2 x 10 sec 2M MgCl2	50
ROR1	MDK	5000	2	60	30	240	2 x 10 sec 2M MgCl2	50

## Sheet: PTPRA_GAS1
KD (M)	Rmax (RU)	offset (RU)	Chi≤ (RU≤)
1.13e-06			0.0234
	8.88	-0.4038
KD (M)	SE(KD)	Rmax (RU)	SE(Rmax)	offset (RU)	SE(offset)
1.13e-06	1.1e-07
		8.9	0.18	-0.4	0.15

## Sheet: PTPRU_OMG
Curve	ka (1/Ms)	kd (1/s)	KD (M)	Rmax (RU)	Conc (M)	tc	Flow (ul/min)	kt (RU/Ms)	RI (RU)	Chi≤ (RU≤)	U-value
	6694	0.0004724	7.057e-08	731.3		1418000000000000				369	5
					2.344e-07		30	4407000000000000	10.63
					4.688e-07		30	4407000000000000	13.15
					9.375e-07		30	4407000000000000	14.37
					1.875e-06		30	4407000000000000	9.346
					3.75e-06		30	4407000000000000	-4.81
					7.5e-06		30	4407000000000000	-24.65
					1.5e-05		30	4407000000000000	-25.85
Curve	ka (1/Ms)	SE(ka)	kd (1/s)	SE(kd)	Rmax (RU)	SE(Rmax)	Conc (M)	tc	SE(tc)	f (ul/min)	RI (RU)	SE(RI)
	6694	8.8	0.0004724	4.7e-06	731.3	0.54		1418000000000000	4.4e+16
							2.344e-07			30	10.6	0.78
							4.688e-07			30	13.2	0.79
							9.375e-07			30	14.4	0.79
							1.875e-06			30	9.3	0.81
							3.75e-06			30	-4.8	0.84
							7.5e-06			30	-24.6	0.86
							1.5e-05			30	-25.8	0.88

## Sheet: PTPRU_OSTN
Curve	ka (1/Ms)	kd (1/s)	KD (M)	Rmax (RU)	Conc (M)	tc	Flow (ul/min)	kt (RU/Ms)	RI (RU)	Chi≤ (RU≤)	U-value
	290000	0.00368	1.27e-08	196.2		2.69e+16				21	2
					9.77e-10		30	8.36e+16	-1.286
					1.95e-09		30	8.36e+16	-1.296
					3.91e-09		30	8.36e+16	-0.5508
					7.81e-09		30	8.36e+16	2.62
					1.56e-08		30	8.36e+16	6.647
					3.13e-08		30	8.36e+16	11.81
					6.25e-08		30	8.36e+16	12.08
					1.25e-07		30	8.36e+16	1.638
					2.5e-07		30	8.36e+16	-8.195
Curve	ka (1/Ms)	SE(ka)	kd (1/s)	SE(kd)	Rmax (RU)	SE(Rmax)	Conc (M)	tc	SE(tc)	f (ul/min)	RI (RU)	SE(RI)
	290000	560	0.003684	7.2e-06	196.2	0.2		2.69e+16	7.3e+17
							9.77e-10			30	-1.3	0.19
							1.95e-09			30	-1.3	0.19
							3.91e-09			30	-0.6	0.19
							7.81e-09			30	2.6	0.19
							1.56e-08			30	6.6	0.19
							3.13e-08			30	11.8	0.2
							6.25e-08			30	12.1	0.2
							1.25e-07			30	1.6	0.21
							2.5e-07			30	-8.2	0.22

## Sheet: KIR3DL1_TAFA2
ka (1/Ms)	kd (1/s)	KD (M)	Rmax (RU)	Conc (M)	tc	Flow (ul/min)	kt (RU/Ms)	RI (RU)	Chi≤ (RU≤)	U-value
965	0.00166	1.72e-06	5.066		54800000000000				0.585	15
				3.125e-07		30	170000000000000	0.3649
				6.25e-07		30	170000000000000	0.4814
				1.25e-06		30	170000000000000	0.8954
				2.5e-06		30	170000000000000	1.32
				5e-06		30	170000000000000	1.951
				1e-05		30	170000000000000	2.719
				2e-05		30	170000000000000	4.145
				4e-05		30	170000000000000	6.265
ka (1/Ms)	SE(ka)	kd (1/s)	SE(kd)	Rmax (RU)	SE(Rmax)	Conc (M)	tc	SE(tc)	f (ul/min)	RI (RU)	SE(RI)
964.7	12	0.001661	4e-05	5.1	0.036		54800000000000	7.3e+19
						3.125e-07			30	0.4	0.031
						6.25e-07			30	0.5	0.031
						1.25e-06			30	0.9	0.031
						2.5e-06			30	1.3	0.031
						5e-06			30	2	0.032
						1e-05			30	2.7	0.033
						2e-05			30	4.1	0.034
						4e-05			30	6.3	0.036

## Sheet: MFRP_PTN
KD (M)	Rmax (RU)	offset (RU)	Chi≤ (RU≤)
1.22e-06			0.279
	20.78	1.063
KD (M)	SE(KD)	Rmax (RU)	SE(Rmax)	offset (RU)	SE(offset)
1.22e-06	2e-07
		20.8	0.96	1.1	0.41

## Sheet: ROR1_PTN
KD (M)	Rmax (RU)	offset (RU)	Chi≤ (RU≤)
1.659e-06			0.663
	20.73	0.8533
KD (M)	SE(KD)	Rmax (RU)	SE(Rmax)	offset (RU)	SE(offset)
1.659e-06	2.6e-07
		20.7	0.81	0.9	0.41

## Sheet: RNF167_TAFA2
KD (M)	Rmax (RU)	offset (RU)	Chi≤ (RU≤)
0.0003136			0.0271
	96.03	0.2753
KD (M)	SE(KD)	Rmax (RU)	SE(Rmax)	offset (RU)	SE(offset)
0.0003136	3.6e-05
		96	8.5	0.3	0.081

## Sheet: TAFA5_RNF167
KD (M)	Rmax (RU)	offset (RU)	Chi≤ (RU≤)
2.333e-05			0.07
	23.69	-1.988
KD (M)	SE(KD)	Rmax (RU)	SE(Rmax)	offset (RU)	SE(offset)
2.333e-05	2.5e-06
		23.7	0.9	-2	0.23
