# Supplementary figures and images for: Identification of orphan ligand-receptor relationships using a cell-based CRISPRa enrichment screening platform
Source: eLife journal article supplement (doi:10.7554/elife.81398), 2022-09-30

Figure 5-figure supplement 1

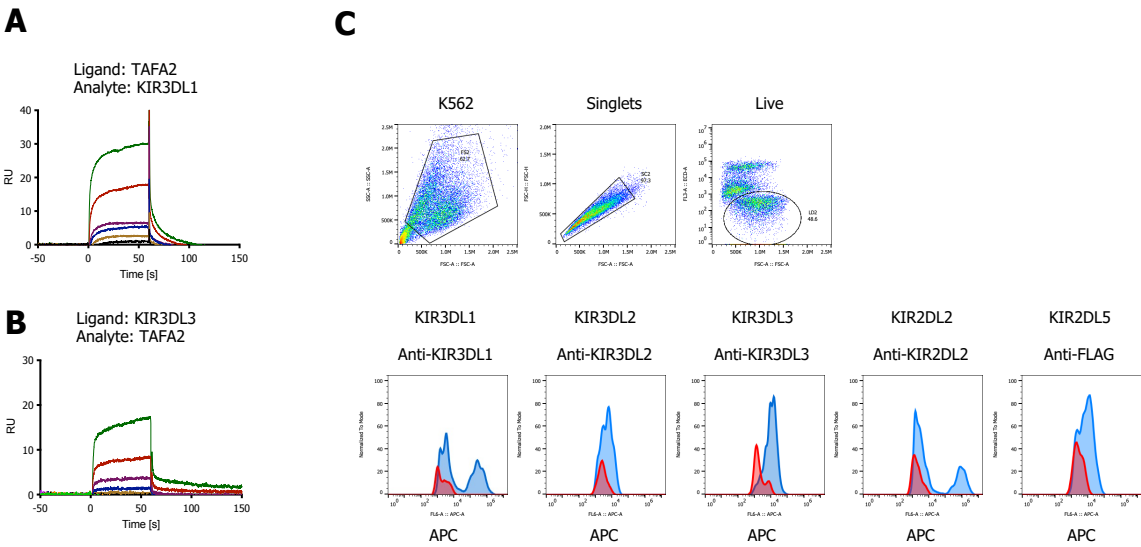

Supplement: supp [file elife-81398-supp-v2.zip]

Figure 6-figure supplement 1

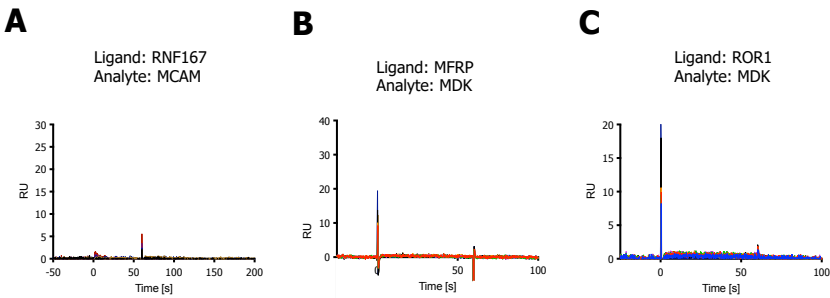

Supplement: supp [file elife-81398-supp-v2.zip]

Figure 2-figure supplement 3

A

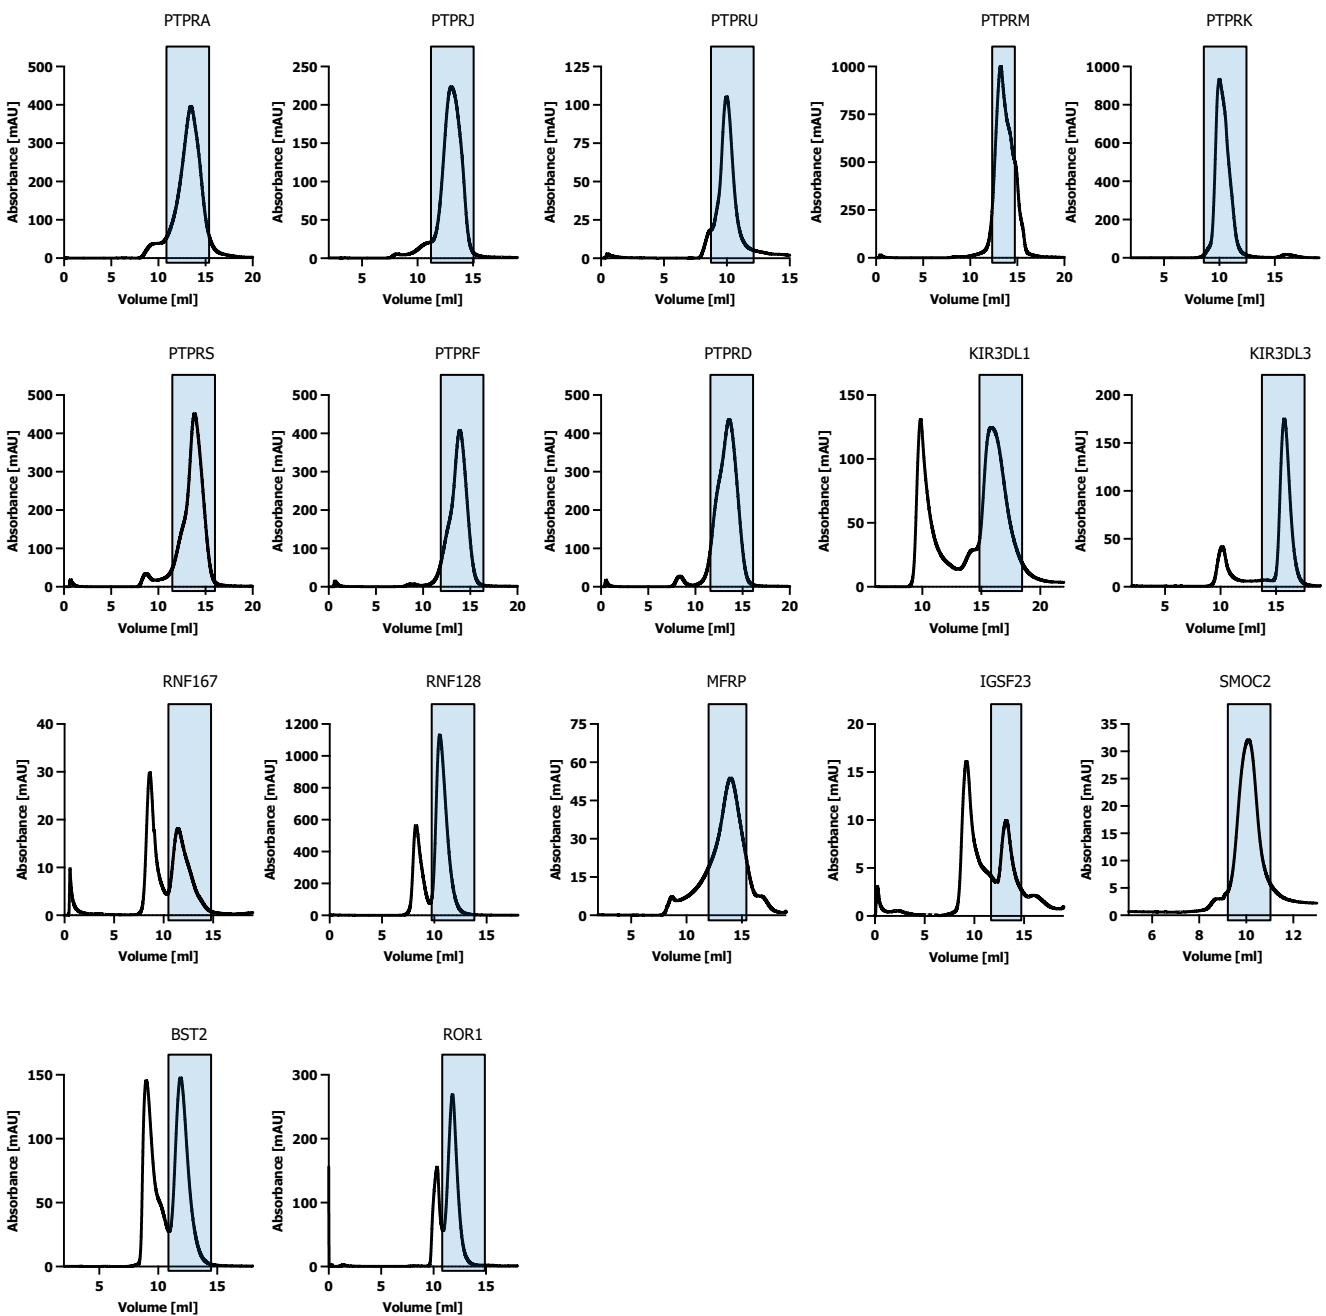

Supplement: supp [file elife-81398-supp-v2.zip]

Figure 4-figure supplement 1

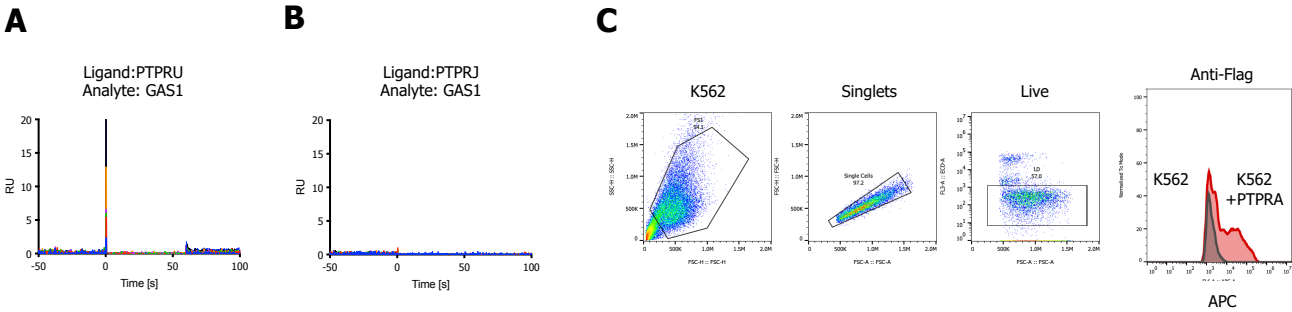

Supplement: supp [file elife-81398-supp-v2.zip]

Figure 3-figure supplement 1

A

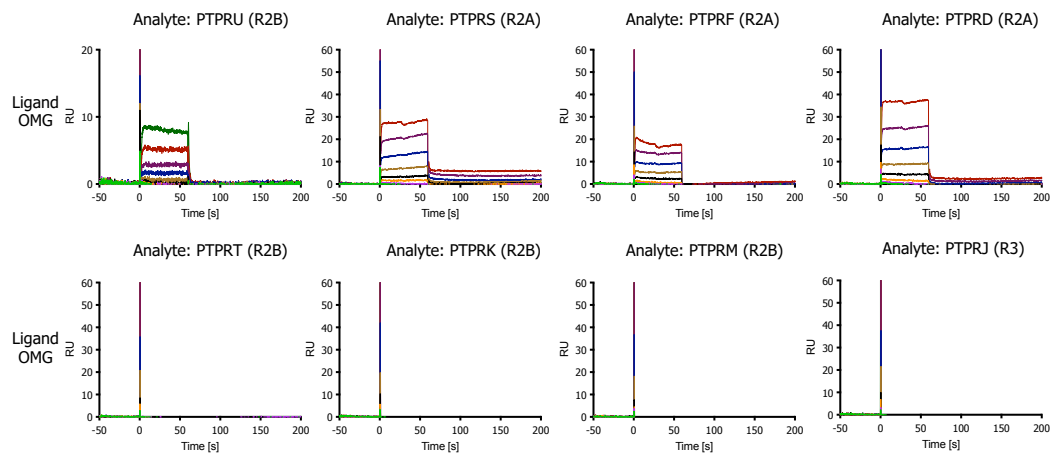

B

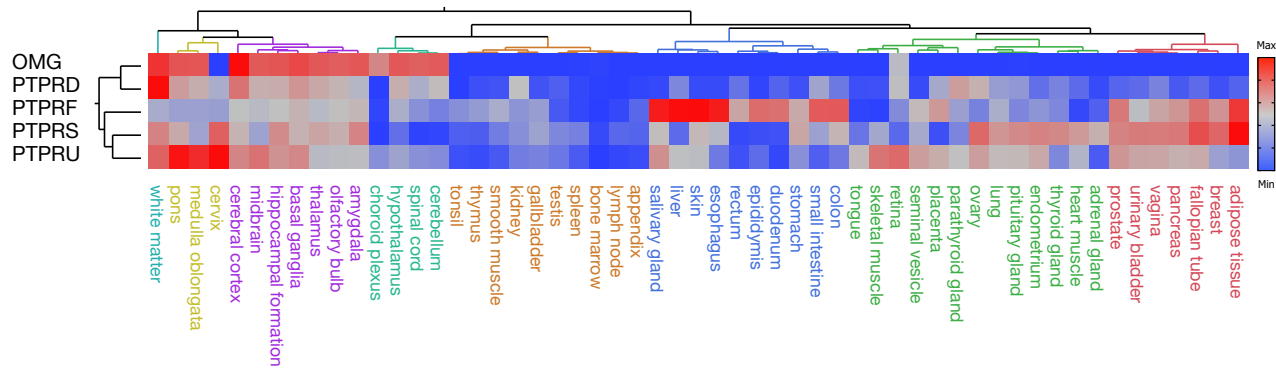

C

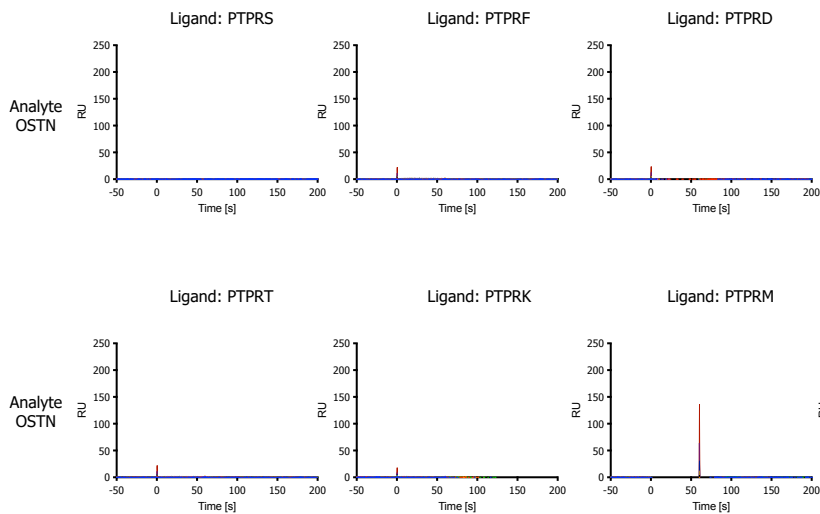

D

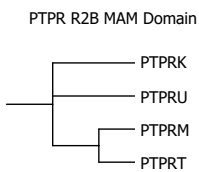

Supplement: supp [file elife-81398-supp-v2.zip]

Figure 2-figure supplement 2

A

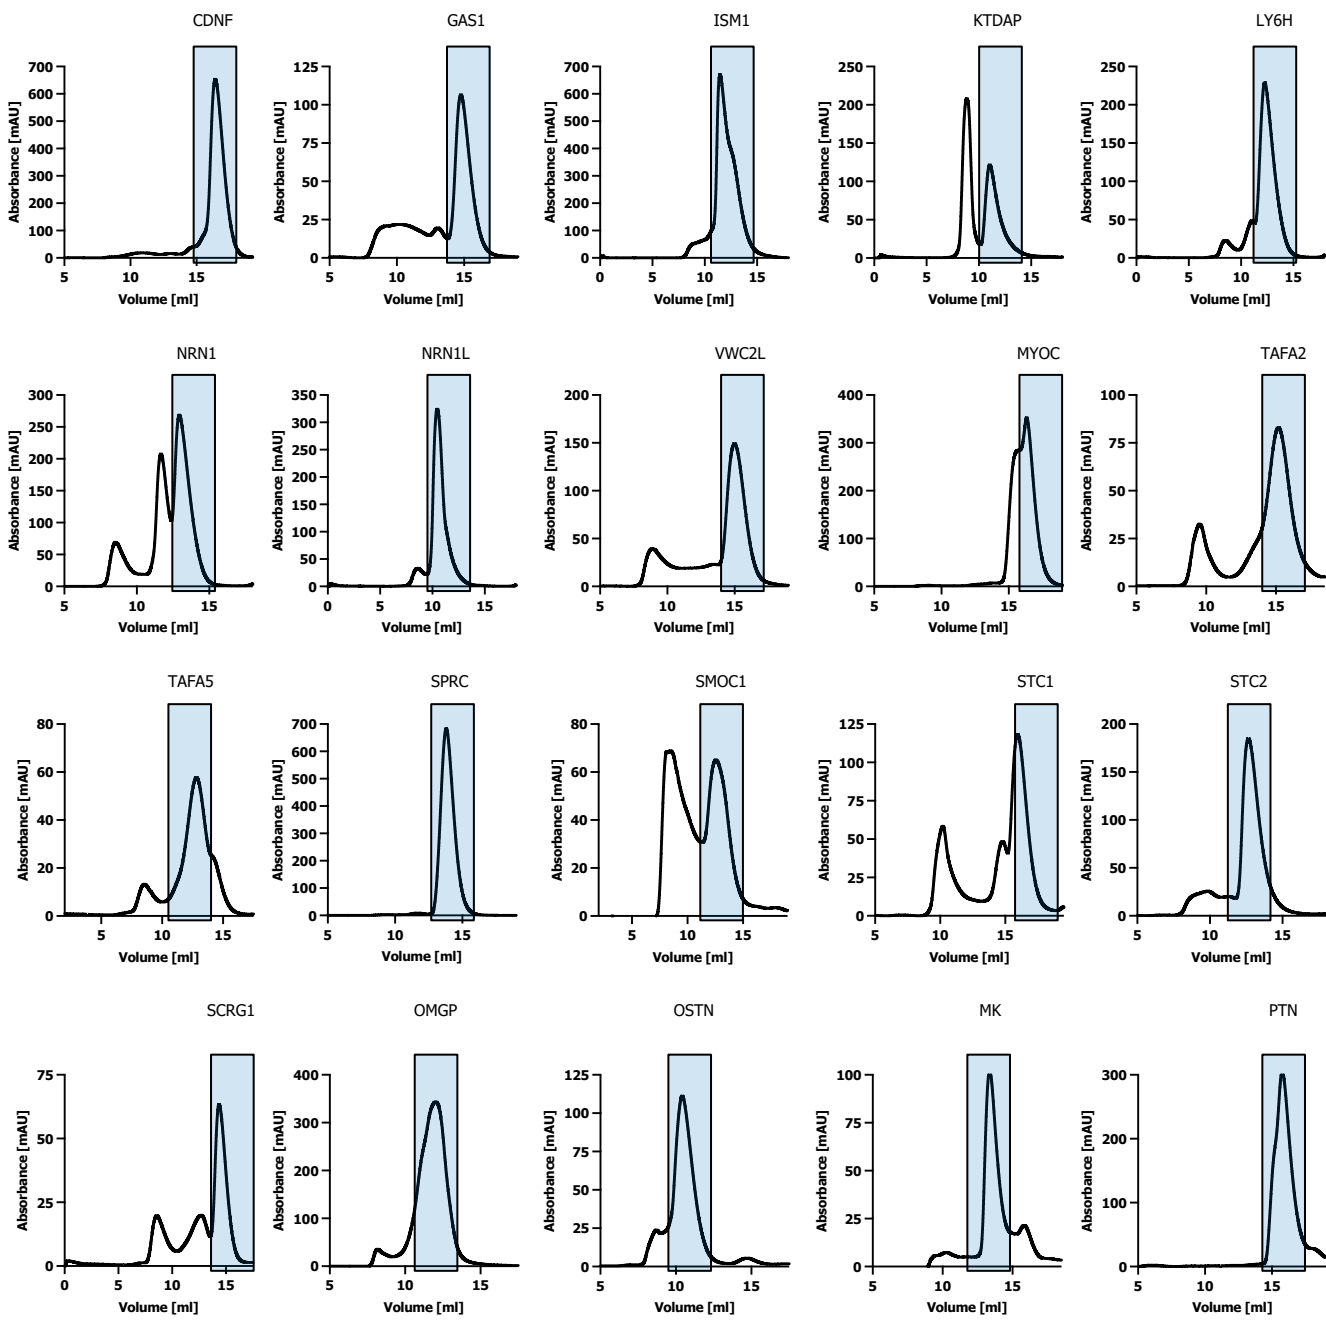

Supplement: supp [file elife-81398-supp-v2.zip]

Figure 2-figure supplement 1

A

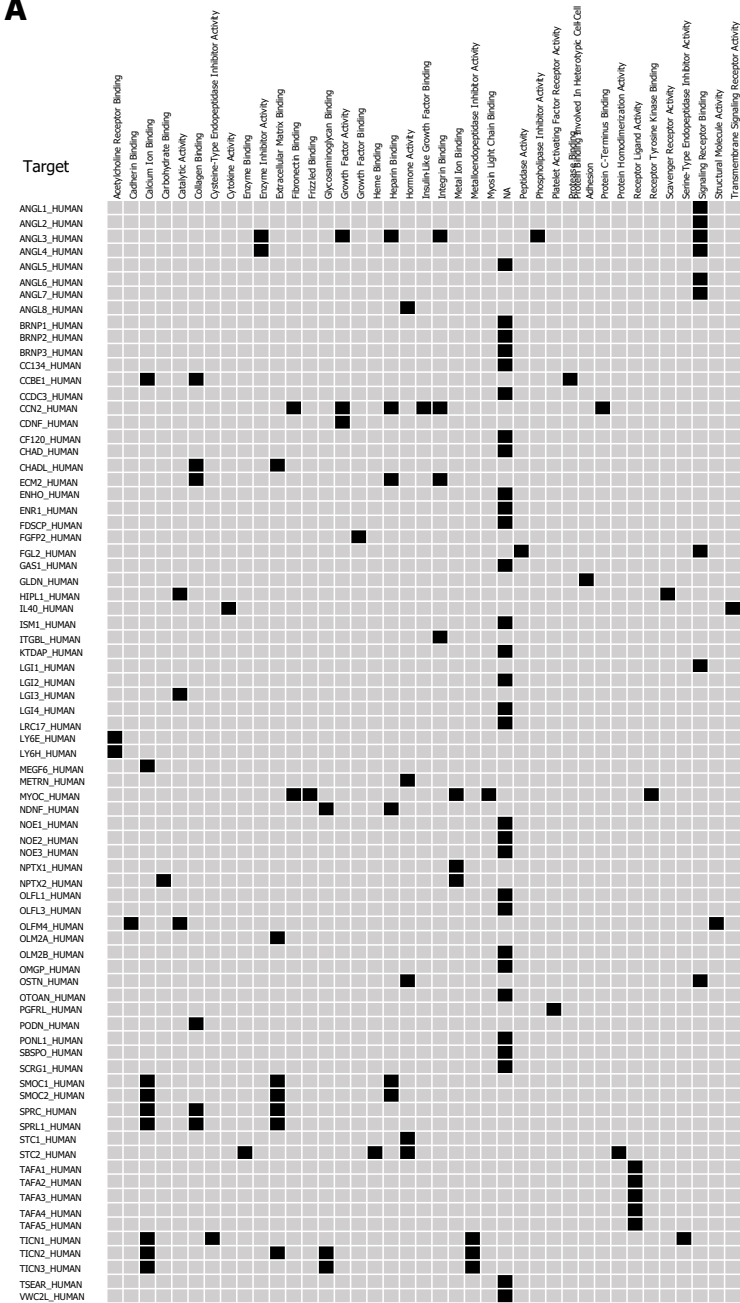

B

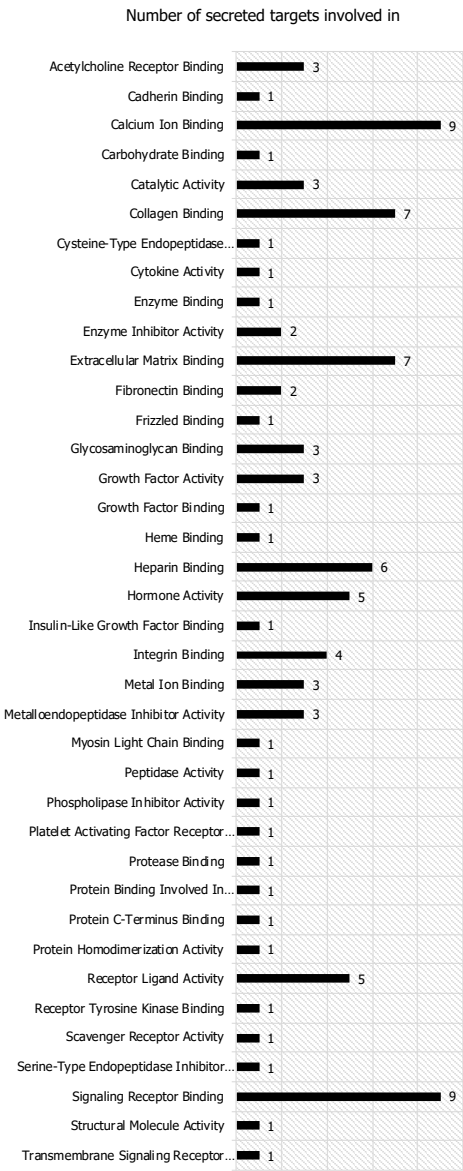

Supplement: supp [file elife-81398-supp-v2.zip]

Figure 2-figure supplement 4

A

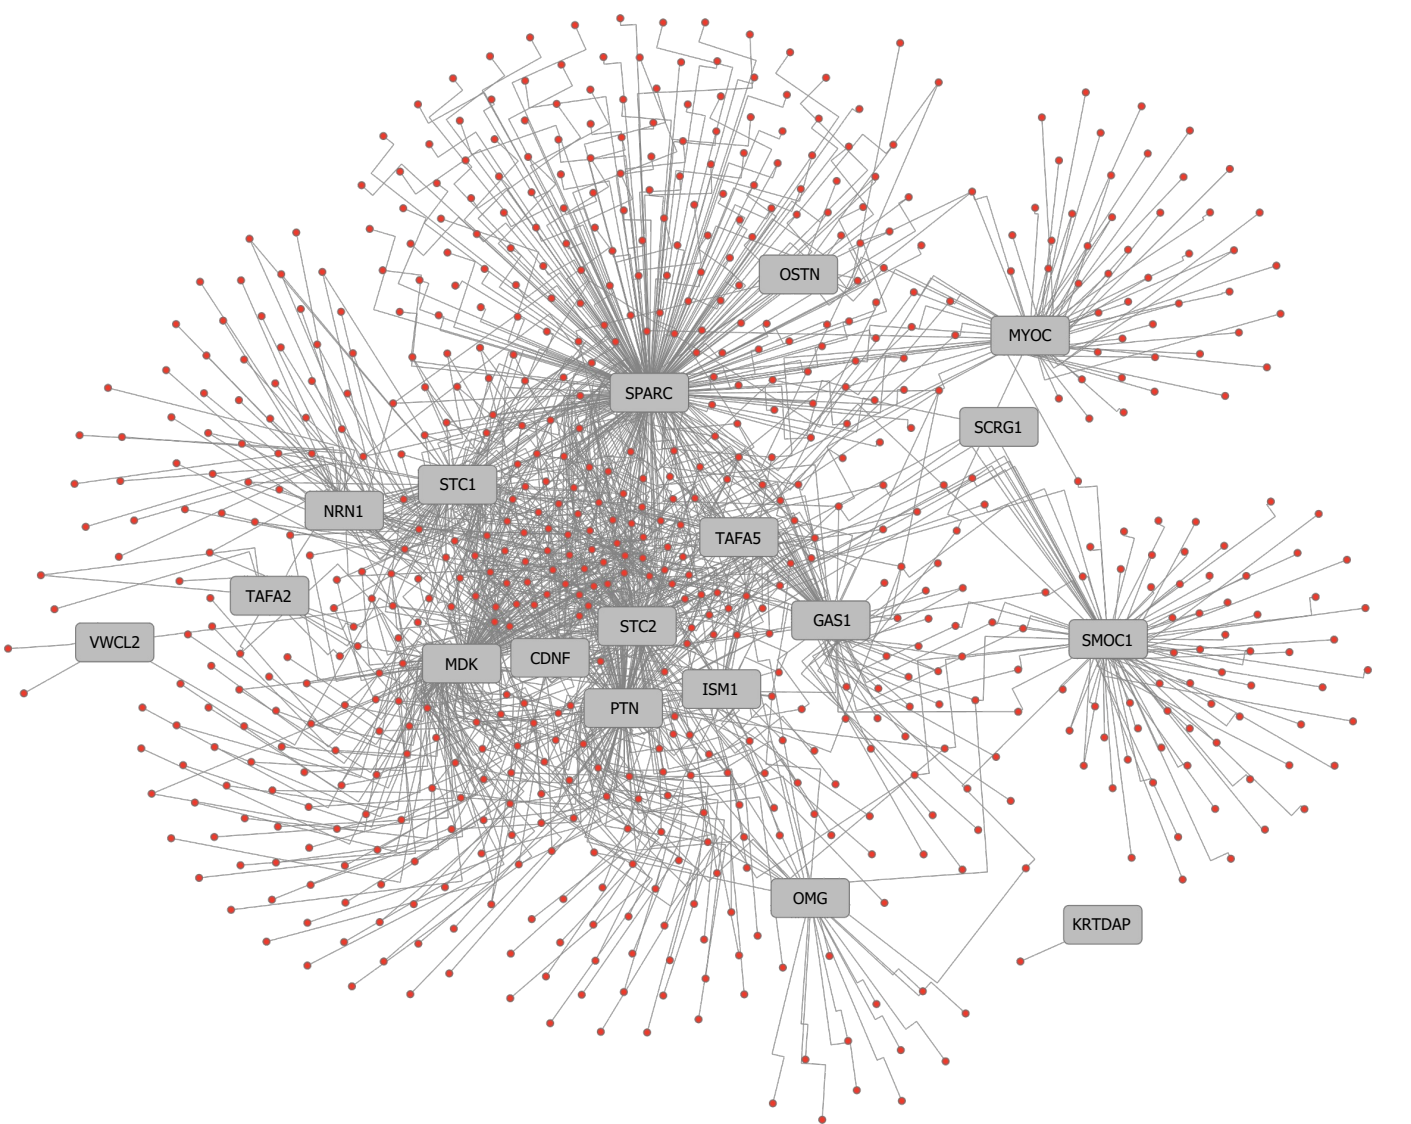

Supplement: supp [file elife-81398-supp-v2.zip]

Figure 1-figure supplement 1

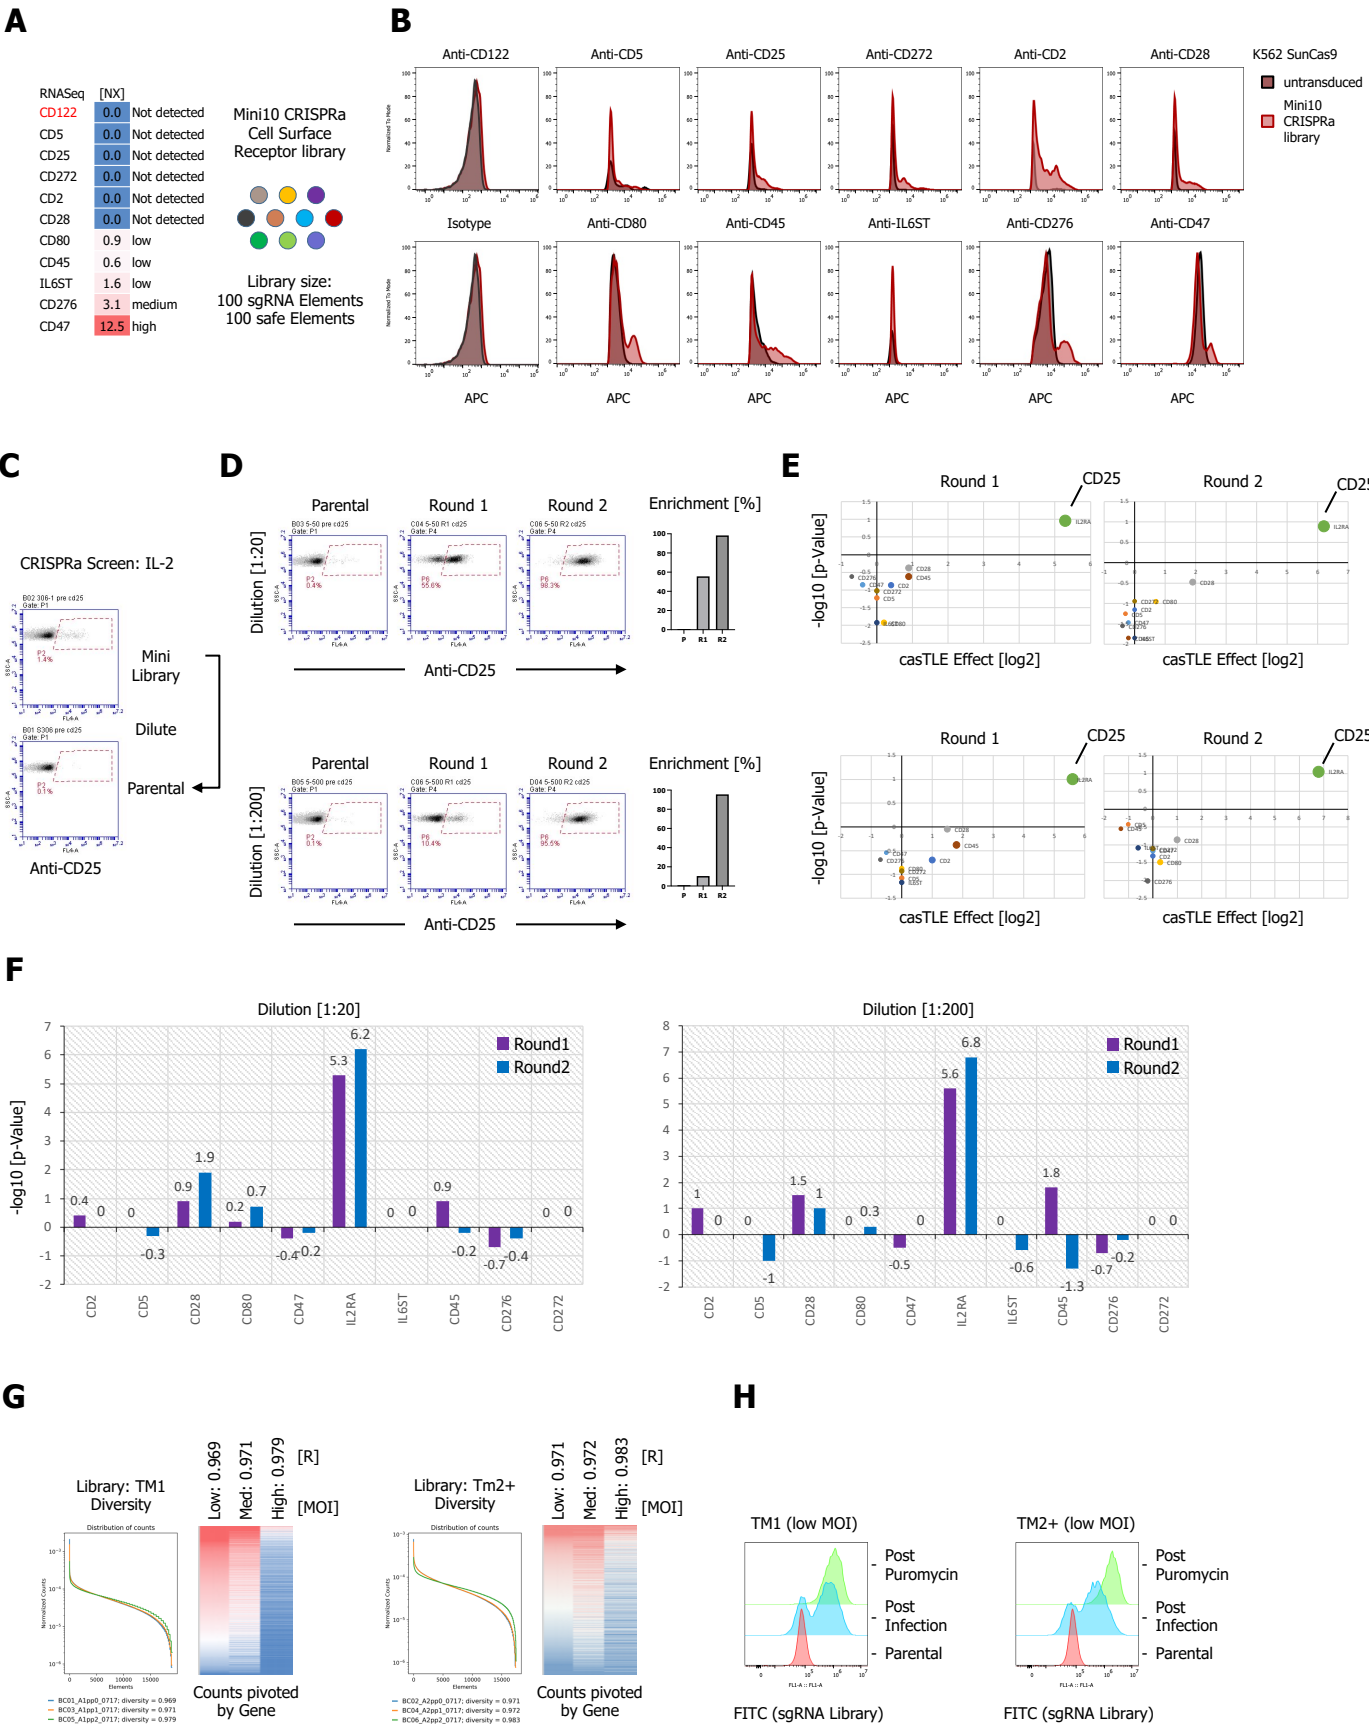

Supplement: supp [file elife-81398-supp-v2.zip]

Figure 7-figure supplement 1

A

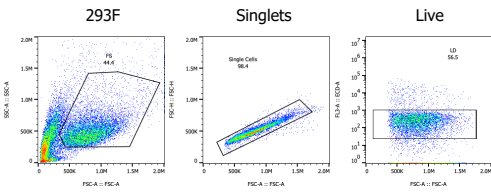

Supplement: supp [file elife-81398-supp-v2.zip]
